# Supplementary material for: SCN1A Mutation—Beyond Dravet Syndrome: A Systematic Review and Narrative Synthesis
Source: Front Neurol. 2021 Dec 24;12:743726. doi: 10.3389/fneur.2021.743726 (PMC8739186; doi:10.3389/fneur.2021.743726)
Supplement: Supplementary file 1 [file Data_Sheet_1.ZIP]

Archive with 6 entries (5 files):
- ╬─╧╫╝∞╦≈/Pubmed(1389 ).csv
- ╬─╧╫╝∞╦≈/Scopus (1500).csv
- ╬─╧╫╝∞╦≈/duplicatesú¿1147ú⌐.xls
- ╬─╧╫╝∞╦≈/exclude duplicates (1742).xls
- ╬─╧╫╝∞╦≈/include 453.xls
- ╬─╧╫╝∞╦≈/
