# Supplementary material for: SCN1A Mutation—Beyond Dravet Syndrome: A Systematic Review and Narrative Synthesis
Source: Front Neurol. 2021 Dec 24;12:743726. doi: 10.3389/fneur.2021.743726 (PMC8739186; doi:10.3389/fneur.2021.743726)
Supplement: Supplementary file 1 [file Data_Sheet_1.ZIP › ╬─╧╫╝∞╦≈/exclude duplicates (1742).xls]

## Sheet: animals and cells（331）
17515128	[Na channel gene mutations and epilepsy mouse model]	2007	Yamakawa K	No To Hattatsu	No To Hattatsu	No To Hattatsu
32394465	A 5-HT1D-receptor agonist protects Dravet syndrome mice from seizure and early death	Article	2020	Hatini P.G., Commons K.G.	European Journal of Neuroscience	52
19409490	A BAC transgenic mouse model reveals neuron subtype-specific effects of a Generalized Epilepsy with Febrile Seizures Plus (GEFS+) mutation	Article	2009	Tang B., Dutt K., Papale L., Rusconi R., Shankar A., Hunter J., Tufik S., Yu F.H., Catterall W.A., Mantegazza M., Goldin A.L., Escayg A.	Neurobiology of Disease	35
34309607	A Behavioral Screen for Heat-Induced Seizures in Mouse Models of Epilepsy	Article	2021	Das A., Smith M.A., O'Dowd D.K.	Journal of visualized experiments : JoVE
34600281	A ketogenic diet protects DBA/1 and Scn1a(R1407X/+) mice against seizure-induced respiratory arrest independent of ketosis	2021	Crotts MS	Epilepsy Behav	Epilepsy Behav	Epilepsy Behav
31265868	A more efficient conditional mouse model of Dravet syndrome: Implications for epigenetic selection and sex-dependent behaviors	Article	2019	Williams A.D., Kalume F., Westenbroek R.E., Catterall W.A.	Journal of Neuroscience Methods	325
8812438	A new sodium channel α-subunit gene (Scn9a) from Schwann cells maps to the Scn1a, Scn2a, Scn3a cluster of mouse chromosome 2	Article	1996	Beckers M.-C., Ernst E., Belcher S., Howe J., Levenson R., Gros P.	Genomics	36
30104343	A transient developmental window of fast-spiking interneuron dysfunction in a mouse model of dravet syndrome	Article	2018	Favero M., Sotuyo N.P., Lopez E., Kearney J.A., Goldberg E.M.	Journal of Neuroscience	38
33411788	Aberrant regulation of a poison exon caused by a non-coding variant in a mouse model of Scn1a-associated epileptic encephalopathy	Article	2021	Voskobiynyk Y., Battu G., Felker S.A., Cochran J.N., Newton M.P., Lambert L.J., Kesterson R.A., Myers R.M., Cooper G.M., Roberson E.D., Barsh G.S.	PLoS Genetics	17
31870807	Adolescent behavioral abnormalities in a Scn1a+/− mouse model of Dravet syndrome	Article	2020	Bahceci D., Anderson L.L., Occelli Hanbury Brown C.V., Zhou C., Arnold J.C.	Epilepsy and Behavior	103
33450277	Allosteric modulation of the cannabinoid 2 receptor confers seizure resistance in mice	Article	2021	Shapiro L., Gado F., Manera C., Escayg A.	Neuropharmacology	188
32793597	Alterations of the Hippocampal Neurogenic Niche in a Mouse Model of Dravet Syndrome	2020	Martín-Suárez S	Front Cell Dev Biol	Front Cell Dev Biol	Front Cell Dev Biol
1	Alterations of the Hippocampal Neurogenic Niche in a Mouse Model of Dravet Syndrome	Article	2020	Martín-Suárez S., Abiega O., Ricobaraza A., Hernandez-Alcoceba R., Encinas J.M.	Frontiers in Cell and Developmental Biology	8
27066534	Altered glycolysis and mitochondrial respiration in a zebrafish model of Dravet syndrome	Article	2016	Kumar M.G., Rowley S., Fulton R., Dinday M.T., Baraban S.C., Patel M.	eNeuro	3
23311867	Altered sleep regulation in a mouse model of SCN1A -derived genetic epilepsy with febrile seizures plus (GEFS+)	Article	2013	Papale L.A., Makinson C.D., Christopher Ehlen J., Tufik S., Decker M.J., Paul K.N., Escayg A.	Epilepsia	54
32848094	Antisense oligonucleotides increase Scn1a expression and reduce seizures and SUDEP incidence in a mouse model of Dravet syndrome	Article	2020	Han Z., Chen C., Christiansen A., Ji S., Lin Q., Anumonwo C., Liu C., Leiser S.C., Meena, Aznarez I., Liau G., Isom L.L.	Science Translational Medicine	12
33069731	Atypical myelinogenesis and reduced axon caliber in the Scn1a variant model of Dravet syndrome: An electron microscopy pilot study of the developing and mature mouse corpus callosum	Article	2021	Richards K., Jancovski N., Hanssen E., Connelly A., Petrou S.	Brain Research	1751
22914087	Autistic-like behaviour in Scn1a +- mice and rescue by enhanced GABA-mediated neurotransmission	Article	2012	Han S., Tai C., Westenbroek R.E., Yu F.H., Cheah C.S., Potter G.B., Rubenstein J.L., Scheuer T., De La Iglesia H.O., Catterall W.A.	Nature	489
28812061	Behavioral comorbidities and drug treatments in a zebrafish scn1lab model of dravet syndrome	Article	2017	Grone B.P., Qu T., Baraban S.C.	eNeuro	4
30868126	C57BL/6J and C57BL/6N substrains differentially influence phenotype severity in the Scn1a (+/-) mouse model of Dravet syndrome	2018	Kang SK	Epilepsia Open	Epilepsia Open	Epilepsia Open
1	C57BL/6J and C57BL/6N substrains differentially influence phenotype severity in the Scn1a+/− mouse model of Dravet syndrome	Article	2019	Kang S.K., Hawkins N.A., Kearney J.A.	Epilepsia Open	4
28556246	Cacna1g is a genetic modifier of epilepsy in a mouse model of Dravet syndrome	Article	2017	Calhoun J.D., Hawkins N.A., Zachwieja N.J., Kearney J.A.	Epilepsia	58
27656030	Calpain activation in Alzheimer’s model mice is an artifact of APP and presenilin overexpression	Article	2016	Saito T., Matsuba Y., Yamazaki N., Hashimoto S., Saido T.C.	Journal of Neuroscience	36
33395525	Cannabichromene, Related Phytocannabinoids, and 5-Fluoro-cannabichromene Have Anticonvulsant Properties in a Mouse Model of Dravet Syndrome	Article	2021	Anderson L.L., Ametovski A., Lin Luo J., Everett-Morgan D., McGregor I.S., Banister S.D., Arnold J.C.	ACS Chemical Neuroscience	12
28973916	Cannabidiol attenuates seizures and social deficits in a mouse model of Dravet syndrome	Article	2017	Kaplan J.S., Stella N., Catterall W.A., Westenbroek R.E.	Proceedings of the National Academy of Sciences of the United States of America	114
32321192	Cannabidiol improves survival and behavioural co-morbidities of Dravet syndrome in mice	Article	2020	Patra P.H., Serafeimidou-Pouliou E., Bazelot M., Whalley B.J., Williams C.M., McNeish A.J.	British Journal of Pharmacology	177
34384142	Cannabigerolic acid, a major biosynthetic precursor molecule in cannabis, exhibits divergent effects on seizures in mouse models of epilepsy	Article	2021	Anderson L.L., Heblinski M., Absalom N.L., Hawkins N.A., Bowen M.T., Benson M.J., Zhang F., Bahceci D., Doohan P.T., Chebib M., McGregor I.S., Kearney J.A., Arnold J.C.	British Journal of Pharmacology
32585475	Cannabis constituents reduce seizure behavior in chemically-induced and scn1a-mutant zebrafish	Article	2020	Thornton C., Dickson K.E., Carty D.R., Ashpole N.M., Willett K.L.	Epilepsy and Behavior	110
34308420	Combined Antiseizure Efficacy of Cannabidiol and Clonazepam in a Conditional Mouse Model of Dravet Syndrome	2021	Chuang SH	J Exp Neurol	J Exp Neurol	J Exp Neurol
22471526	Confirmation of an epilepsy modifier locus on mouse chromosome 11 and candidate gene analysis by RNA-Seq	Article	2012	Hawkins N.A., Kearney J.A.	Genes, Brain and Behavior	11
32865826	Convulsive seizures and some behavioral comorbidities are uncoupled in the Scn1aA1783V Dravet syndrome mouse model	Article	2020	Fadila S., Quinn S., Turchetti Maia A., Yakubovich D., Ovadia M., Anderson K.L., Giladi M., Rubinstein M.	Epilepsia	61
32445790	CRISPR/dCas9-based Scn1a gene activation in inhibitory neurons ameliorates epileptic and behavioral phenotypes of Dravet syndrome model mice	Article	2020	Yamagata T., Raveau M., Kobayashi K., Miyamoto H., Tatsukawa T., Ogiwara I., Itohara S., Hensch T.K., Yamakawa K.	Neurobiology of Disease	141
31607539	dCas9-Based Scn1a Gene Activation Restores Inhibitory Interneuron Excitability and Attenuates Seizures in Dravet Syndrome Mice	Article	2019	Colasante G., Lignani G., Brusco S., Di Berardino C., Carpenter J., Giannelli S., Valassina N., Bido S., Ricci R., Castoldi V., Marenna S., Church T., Massimino L., Morabito G., Benfenati F., Schorge S., Leocani L., Kullmann D.M., Broccoli V.	Molecular Therapy
30996233	Delayed maturation of GABAergic signaling in the Scn1a and Scn1b mouse models of Dravet Syndrome	Article	2019	Yuan Y., O’Malley H.A., Smaldino M.A., Bouza A.A., Hull J.M., Isom L.L.	Scientific Reports	9
33910599	Deletion of a non-canonical regulatory sequence causes loss of Scn1a expression and epileptic phenotypes in mice	Article	2021	Haigh J.L., Adhikari A., Copping N.A., Stradleigh T., Wade A.A., Catta-Preta R., Su-Feher L., Zdilar I., Morse S., Fenton T.A., Nguyen A., Quintero D., Agezew S., Sramek M., Kreun E.J., Carter J., Gompers A., Lambert J.T., Canales C.P., Pennacchio L.A., Visel A., Dickel D.E., Silverman J.L., Nord A.S.	Genome Medicine	13
33271326	Developmental alterations in firing properties of hippocampal CA1 inhibitory and excitatory neurons in a mouse model of Dravet syndrome	Article	2021	Almog Y., Fadila S., Brusel M., Mavashov A., Anderson K., Rubinstein M.	Neurobiology of Disease	148
34425903	Developmental dynamics of voltage-gated sodium channel isoform expression in the human and mouse brain	Article	2021	Liang L., Fazel Darbandi S., Pochareddy S., Gulden F.O., Gilson M.C., Sheppard B.K., Sahagun A., An J.-Y., Werling D.M., Rubenstein J.L.R., Sestan N., Bender K.J., Sanders S.J.	Genome Medicine	13
20006674	Differential expression of exon 5 splice variants of sodium channel α subunit mRNAs in the developing mouse brain	Article	2010	Gazina E.V., Richards K.L., Mokhtar M.B.C., Thomas E.A., Reid C.A., Petrou S.	Neuroscience	166
33144172	Disordered autonomic function during exposure to moderate heat or exercise in a mouse model of Dravet syndrome	Article	2021	Sahai N., Bard A.M., Devinsky O., Kalume F.	Neurobiology of Disease	147
31025941	Disordered breathing in a mouse model of Dravet syndrome	Article	2019	Kuo F.-S., Cleary C.M., Loturco J.J., Chen X., Mulkey D.K.	eLife	8
15007009	Distinct subcellular localization of different sodium channel alpha and beta subunits in single ventricular myocytes from mouse heart	2004	Maier SK	Circulation	Circulation	Circulation
31402621	Donepezil increases resistance to induced seizures in a mouse model of Dravet syndrome	Article	2019	Wong J.C., Thelin J.T., Escayg A.	Annals of Clinical and Translational Neurology	6
22260870	Dorsal root ganglia isolated from Nf1+/- mice exhibit increased levels of mRNA expression of voltage-dependent sodium channels	2012	Hodgdon KE	Neuroscience	Neuroscience	Neuroscience
1	Double trouble: Impairment of two interneuron types in a dravet mouse model	Note	2014	Kearney J.A.	Epilepsy Currents	15
24002024	Drug screening in Scn1a zebrafish mutant identifies clemizole as a potential Dravet syndrome treatment	Article	2013	Baraban S.C., Dinday M.T., Hortopan G.A.	Nature Communications	4
23494229	Effects of an epilepsy-causing mutation in the SCN1A sodium channel gene on cocaine-induced seizure susceptibility in mice	Article	2013	Purcell R.H., Papale L.A., Makinson C.D., Sawyer N.T., Schroeder J.P., Escayg A., Weinshenker D.	Psychopharmacology	228
22578034	Efficacy of stiripentol in hyperthermia-induced seizures in a mouse model of Dravet syndrome	Article	2012	Cao D., Ohtani H., Ogiwara I., Ohtani S., Takahashi Y., Yamakawa K., Inoue Y.	Epilepsia	53
32554600	Electrophysiological alterations of pyramidal cells and interneurons of the CA1 region of the hippocampus in a novel mouse model of dravet syndrome	Article	2020	Dyment D.A., Schock S.C., Deloughery K., Tran M.H., Ure K., Nutter L.M.J., Creighton A., Yuan J., Banderali U., Comas T., Baumann E., Jezierski A., Boycott K.M., Mackenzie A.E., Martina M., Care4Rare Canada Consortium	Genetics	215
34045209	Enhanced synaptic transmission in the extended amygdala and altered excitability in an extended amygdala to brainstem circuit in a dravet syndrome mouse model	Article	2021	Yan W.W., Xia M., Chiang J., Levitt A., Hawkins N., Kearney J., Swanson G.T., Chetkovich D., Nobis W.P.	eNeuro	8
33842883	Enhancing glucose metabolism via gluconeogenesis is therapeutic in a zebrafish model of Dravet syndrome	2021	Banerji R	Brain Commun	Brain Commun	Brain Commun
31578435	Epilepsy and neuropsychiatric comorbidities in mice carrying a recurrent Dravet syndrome SCN1A missense mutation	Article	2019	Ricobaraza A., Mora-Jimenez L., Puerta E., Sanchez-Carpintero R., Mingorance A., Artieda J., Nicolas M.J., Besne G., Bunuales M., Gonzalez-Aparicio M., Sola-Sevilla N., Valencia M., Hernandez-Alcoceba R.	Scientific Reports	9
32979291	Excitatory and inhibitory neuron defects in a mouse model of Scn1b-linked EIEE52	Article	2020	Hull J.M., O’Malley H.A., Chen C., Yuan Y., Denomme N., Bouza A.A., Anumonwo C., Lopez-Santiago L.F., Isom L.L.	Annals of Clinical and Translational Neurology	7
18381897	Extensive variation between inbred mouse strains due to endogenous L1 retrotransposition	Article	2008	Akagi K., Li J., Stephens R.M., Volfovsky N., Symer D.E.	Genome Research	18
27768696	Fine Mapping of a Dravet Syndrome Modifier Locus on Mouse Chromosome 5 and Candidate Gene Analysis by RNA-Seq	Article	2016	Hawkins N.A., Zachwieja N.J., Miller A.R., Anderson L.L., Kearney J.A.	PLoS Genetics	12
31880072	First FHM3 mouse model shows spontaneous cortical spreading depolarizations	Article	2020	Jansen N.A., Dehghani A., Linssen M.M.L., Breukel C., Tolner E.A., van den Maagdenberg A.M.J.M.	Annals of Clinical and Translational Neurology	7
32190912	Focal and generalized seizure activity after local hippocampal or cortical ablation of NaV1.1 channels in mice	Article	2020	Jansen N.A., Dehghani A., Breukel C., Tolner E.A., van den Maagdenberg A.M.J.M.	Epilepsia	61
34086081	Gabra2 is a genetic modifier of Dravet syndrome in mice	Article	2021	Hawkins N.A., Nomura T., Duarte S., Barse L., Williams R.W., Homanics G.E., Mulligan M.K., Contractor A., Kearney J.A.	Mammalian Genome	32
30347190	Gene expression profiling in a mouse model of Dravet syndrome	Article	2019	Hawkins N.A., Calhoun J.D., Huffman A.M., Kearney J.A.	Experimental Neurology	311
25281316	Genetic background modulates impaired excitability of inhibitory neurons in a mouse model of Dravet syndrome	Article	2015	Rubinstein M., Westenbroek R.E., Yu F.H., Jones C.J., Scheuer T., Catterall W.A.	Neurobiology of Disease	73
28505490	Heat induced temperature dysregulation and seizures in Dravet Syndrome/GEFS+ Gabrg2+/Q390X mice	Article	2017	Warner T.A., Liu Z., Macdonald R.L., Kang J.-Q.	Epilepsy Research	134
31346088	Hippocampal deletion of NaV1.1 channels in mice causes thermal seizures and cognitive deficit characteristic of Dravet Syndrome	Article	2019	Stein R.E., Kaplan J.S., Li J., Catterall W.A.	Proceedings of the National Academy of Sciences of the United States of America	116
23663038	Hippocampal hyperexcitability and specific epileptiform activity in a mouse model of Dravet syndrome	Article	2013	Liautard C., Scalmani P., Carriero G., De Curtis M., Franceschetti S., Mantegazza M.	Epilepsia	54
31697745	Home-cage monitoring ascertains signatures of ictal and interictal behavior in mouse models of generalized seizures	Article	2019	Jankovic M.J., Kapadia P.P., Krishnan V.	PLoS ONE	14
27799911	Huperzine A Provides Robust and Sustained Protection against Induced Seizures in Scn1a Mutant Mice	2016	Wong JC	Front Pharmacol	Front Pharmacol	Front Pharmacol
1	Huperzine a provides robust and sustained protection against induced seizures in Scn1a mutant mice	Article	2016	Wong J.C., Dutton S.B.B., Collins S.D., Schachter S., Escayg A.	Frontiers in Pharmacology	7
1	Hyperthermia-Induced Ventricular Tachycardia and Sudden Death in Mouse Model of Dravet Syndrome	Article	2011	Sasano T., Horigome Y., Takahashi Y., Ogiwara I., Furukawa T.	journal of arrhythmia	27
25378155	Impaired action potential initiation in GABAergic interneurons causes hyperexcitable networks in an epileptic mouse model carrying a human Nav1.1 mutation	Article	2014	Hedrich U.B.S., Liautard C., Kirschenbaum D., Pofahl M., Lavigne J., Liu Y., Theiss S., Slotta J., Escayg A., Dihné M., Beck H., Mantegazza M., Lerche H.	Journal of Neuroscience	34
25024183	Impaired excitability of somatostatin- and parvalbumin-expressing cortical interneurons in a mouse model of Dravet syndrome	Article	2014	Tai C., Abe Y., Westenbroek R.E., Scheuer T., Catterall W.A.	Proceedings of the National Academy of Sciences of the United States of America	111
33234612	Impaired θ-γ Coupling indicates inhibitory dysfunction and seizure risk in adravet syndromemouse model	Article	2021	Jansen N.A., Perez C., Schenke M., Van Beurden A.W., Dehghani A., Voskuyl R.A., Thijs R.D., Ullah G., Van Den Maagdenberg A.M.J.M., Tolner E.A.	Journal of Neuroscience	41
29337050	Impairments in social novelty recognition and spatial memory in mice with conditional deletion of Scn1a in parvalbumin-expressing cells	Article	2018	Tatsukawa T., Ogiwara I., Mazaki E., Shimohata A., Yamakawa K.	Neurobiology of Disease	112
34017040	Inhibitory synaptic transmission is impaired at higher extracellular Ca2+ concentrations in Scn1a +/− mouse model of Dravet syndrome	Article	2021	Uchino K., Kawano H., Tanaka Y., Adaniya Y., Asahara A., Deshimaru M., Kubota K., Watanabe T., Katsurabayashi S., Iwasaki K., Hirose S.	Scientific Reports	11
21463282	Insights into pathophysiology and therapy from a mouse model of Dravet syndrome	Article	2011	Oakley J.C., Kalume F., Catterall W.A.	Epilepsia	52
32608111	Interactions between cannabidiol and Δ9-tetrahydrocannabinol in modulating seizure susceptibility and survival in a mouse model of Dravet syndrome	Article	2020	Anderson L.L., Low I.K., McGregor I.S., Arnold J.C.	British Journal of Pharmacology	177
32102923	Interneuron desynchronization precedes seizures in a mouse model of Dravet syndrome	Article	2020	Tran C.H., Vaiana M., Nakuci J., Somarowthu A., Goff K.M., Goldstein N., Murthy P., Muldoon S.F., Goldberg E.M.	Journal of Neuroscience	40
33658306	Interneuron dysfunction in a new mouse model of scn1a gefs+	Article	2021	Das A., Zhu B., Xie Y., Zeng L., Pham A.T., Neumann J.C., Safrina O., Benavides D.R., Macgregor G.R., Schutte S.S., Hunt R.F., O’dowd D.K.	eNeuro	8
20042730	Intrinsic membrane properties of locus coeruleus neurons in Mecp2-null mice	2010	Zhang X	Am J Physiol Cell Physiol	Am J Physiol Cell Physiol	Am J Physiol Cell Physiol
25510870	Lactational exposure to low levels of the six indicator non-dioxin-like polychlorinated biphenyls induces DNA damage and repression of neuronal activity, in juvenile male mice	Article	2015	Elnar A.A., Desor F., Marin F., Soulimani R., Nemos C.	Toxicology	328
26465006	Large-Scale Phenotype-Based Antiepileptic Drug Screening in a Zebrafish Model of Dravet Syndrome	2015	Dinday MT	eNeuro	eNeuro	eNeuro
1	Large-scale phenotype-based antiepileptic drug screening in a zebrafish model of Dravet syndrome	Article	2015	Dinday M.T., Baraban S.C.	eNeuro	2
33864849	Lasting effects of mild embryonic ethanol exposure on voltage-gated ion channels in adult zebrafish brain	Article	2021	Chatterjee D., Mahabir S., Chatterjee D., Gerlai R.	Progress in Neuro-Psychopharmacology and Biological Psychiatry	110
24152123	Mapping genetic modifiers of survival in a mouse model of Dravet syndrome	Article	2014	Miller A.R., Hawkins N.A., Mccollom C.E., Kearney J.A.	Genes, Brain and Behavior	13
27690330	Mapping of a FEB3 homologous febrile seizure locus on mouse chromosome 2 containing candidate genes Scn1a and Scn3a	Article	2016	Hessel E.V.S., van Lith H.A., Wolterink-Donselaar I.G., de Wit M., Groot Koerkamp M.J.A., Holstege F.C.P., Kas M.J.H., Fernandes C., de Graan P.N.E.	European Journal of Neuroscience	44
34223647	Metabolomic signature of the Dravet syndrome: A genetic mouse model study	Article	2021	Miljanovic N., van Dijk R.M., Buchecker V., Potschka H.	Epilepsia	62
15102918	Mice lacking sodium channel beta1 subunits display defects in neuronal excitability, sodium channel expression, and nodal architecture	2004	Chen C	J Neurosci	J Neurosci	J Neurosci
22986304	Mouse with Nav1.1 haploinsufficiency, a model for Dravet syndrome, exhibits lowered sociability and learning impairment	Article	2013	Ito S., Ogiwara I., Yamada K., Miyamoto H., Hensch T.K., Osawa M., Yamakawa K.	Neurobiology of Disease	49
32134913	NaV1.1 and NaV1.6 selective compounds reduce the behavior phenotype and epileptiform activity in a novel zebrafish model for Dravet syndrome	Article	2020	Weuring W.J., Singh S., Volkers L., Rook M.B., Van't Slot R.H., Bosma M., Inserra M., Vetter I., Verhoeven-Duif N.M., Braun K.P.J., Rivara M., Koeleman B.P.C.	PLoS ONE	15
23922229	Nav1.1 haploinsufficiency in excitatory neurons ameliorates seizure-associated sudden death in a mouse model of dravet syndrome	Article	2013	Ogiwara I., Iwasato T., Miyamoto H., Iwata R., Yamagata T., Mazaki E., Yanagawa Y., Tamamaki N., Hensch T.K., Itohara S., Yamakawa K.	Human Molecular Genetics	22
17537961	Nav1.1 localizes to axons of parvalbumin-positive inhibitory interneurons: A circuit basis for epileptic seizures in mice carrying an Scn1a gene mutation	Article	2007	Ogiwara I., Miyamoto H., Morita N., Atapour N., Mazaki E., Inoue I., Takeuchi T., Itohara S., Yanagawa Y., Obata K., Furuichi T., Hensch T.K., Yamakawa K.	Journal of Neuroscience	27
29551491	Nav1.1-Overexpressing Interneuron Transplants Restore Brain Rhythms and Cognition in a Mouse Model of Alzheimer's Disease	Article	2018	Martinez-Losa M., Tracy T.E., Ma K., Verret L., Clemente-Perez A., Khan A.S., Cobos I., Ho K., Gan L., Mucke L., Alvarez-Dolado M., Palop J.J.	Neuron	98
33584198	Neuropathological Characterization of a Dravet Syndrome Knock-In Mouse Model Useful for Investigating Cannabinoid Treatments	2021	Satta V	Front Mol Neurosci	Front Mol Neurosci	Front Mol Neurosci
1	Neuropathological Characterization of a Dravet Syndrome Knock-In Mouse Model Useful for Investigating Cannabinoid Treatments	Article	2021	Satta V., Alonso C., Díez P., Martín-Suárez S., Rubio M., Encinas J.M., Fernández-Ruiz J., Sagredo O.	Frontiers in Molecular Neuroscience	13
32096222	New insights into the early mechanisms of epileptogenesis in a zebrafish model of Dravet syndrome	Article	2020	Tiraboschi E., Martina S., van der Ent W., Grzyb K., Gawel K., Cordero-Maldonado M.L., Poovathingal S.K., Heintz S., Satheesh S.V., Brattespe J., Xu J., Suster M., Skupin A., Esguerra C.V.	Epilepsia	61
31686510	Pharmacokinetics of Phytocannabinoid Acids and Anticonvulsant Effect of Cannabidiolic Acid in a Mouse Model of Dravet Syndrome	Article	2019	Anderson L.L., Low I.K., Banister S.D., McGregor I.S., Arnold J.C.	Journal of Natural Products	82
25965391	Pharmacological characterization of an antisense knockdown zebrafish model of Dravet syndrome: Inhibition of epileptic seizures by the serotonin agonist fenfluramine	Article	2015	Zhang Y., Kecskés A., Copmans D., Langlois M., Crawford A.D., Ceulemans B., Lagae L., De Witte P.A.M., Esguerra C.V.	PLoS ONE	10
31045243	Potentiating a2 subunit containing perisomatic GABAA receptors protects against seizures in a mouse model of Dravet syndrome	Article	2019	Nomura T., Hawkins N.A., Kearney J.A., George A.L., Jr., Contractor A.	Journal of Physiology	597
21801172	Protective effect of the ketogenic diet in Scn1a mutant mice	Article	2011	Dutton S.B.B., Sawyer N.T., Kalume F., Jumbo-Lucioni P., Borges K., Catterall W.A., Escayg A.	Epilepsia	52
34713469	Protective effects of medium chain triglyceride diet in a mouse model of Dravet syndrome	2021	Jancovski N	Epilepsia	Epilepsia	Epilepsia
34144125	Proteomic signature of the Dravet syndrome in the genetic Scn1a-A1783V mouse model	Article	2021	Miljanovic N., Hauck S.M., van Dijk R.M., Di Liberto V., Rezaei A., Potschka H.	Neurobiology of Disease	157
29046322	Pumilio2-deficient mice show a predisposition for epilepsy	Article	2017	Follwaczny P., Schieweck R., Riedemann T., Demleitner A., Straub T., Klemm A.H., Bilban M., Sutor B., Popper B., Kiebler M.A.	DMM Disease Models and Mechanisms	10
31758544	Reduced cannabinoid 2 receptor activity increases susceptibility to induced seizures in mice	Article	2019	Shapiro L., Wong J.C., Escayg A.	Epilepsia	60
21190943	Reduced sodium channel Na(v)1.1 levels in BACE1-null mice	2011	Kim DY	J Biol Chem	J Biol Chem	J Biol Chem
16921370	Reduced sodium current in GABAergic interneurons in a mouse model of severe myoclonic epilepsy in infancy	Article	2006	Yu F.H., Mantegazza M., Westenbroek R.E., Robbins C.A., Kalume F., Burton K.A., Spain W.J., McKnight G.S., Scheuer T., Catterall W.A.	Nature Neuroscience	9
17928448	Reduced sodium current in Purkinje neurons from Nav1.1 mutant mice: implications for ataxia in severe myoclonic epilepsy in infancy	2007	Kalume F	J Neurosci	J Neurosci	J Neurosci
33732797	Relative Quantification of Na(V)1.1 Protein in Mouse Brains Using a Meso Scale Discovery-Electrochemiluminescence (MSD-ECL) Method	2021	Han Z	Bio Protoc	Bio Protoc	Bio Protoc
1	Relative quantification of nav1.1 protein in mouse brains using a meso scale discovery- electrochemiluminescence (msd-ecl) method	Article	2021	Han Z., Christiansen A., Meena, Liau G.	Bio-protocol	11
31943325	Scn8a Antisense Oligonucleotide Is Protective in Mouse Models of SCN8A Encephalopathy and Dravet Syndrome	Article	2020	Lenk G.M., Jafar-Nejad P., Hill S.F., Huffman L.D., Smolen C.E., Wagnon J.L., Petit H., Yu W., Ziobro J., Bhatia K., Parent J., Giger R.J., Rigo F., Meisler M.H.	Annals of Neurology	87
28491900	Screening of conventional anticonvulsants in a genetic mouse model of epilepsy	2017	Hawkins NA	Ann Clin Transl Neurol	Ann Clin Transl Neurol	Ann Clin Transl Neurol
30076230	Selective NaV1.1 activation rescues Dravet syndrome mice from seizures and premature death	Article	2018	Richards K.L., Milligan C.J., Richardson R.J., Jancovski N., Grunnet M., Jacobson L.H., Undheim E.A.B., Mobli M., Chow C.Y., Herzig V., Csoti A., Panyi G., Reid C.A., King G.F., Petrou S.	Proceedings of the National Academy of Sciences of the United States of America	115
29317669	Selective targeting of Scn8a prevents seizure development in a mouse model of mesial temporal lobe epilepsy	Article	2018	Wong J.C., Makinson C.D., Lamar T., Cheng Q., Wingard J.C., Terwilliger E.F., Escayg A.	Scientific Reports	8
31445030	Serotonin abnormalities in Dravet syndrome mice before and after the age of seizure onset	Article	2019	Hatini P.G., Commons K.G.	Brain Research	1724
31830809	Sexually Divergent Mortality and Partial Phenotypic Rescue after Gene Therapy in a Mouse Model of Dravet Syndrome	Article	2020	Niibori Y., Lee S.J., Minassian B.A., Hampson D.R.	Human Gene Therapy	31
25766678	Sleep impairment and reduced interneuron excitability in a mouse model of Dravet Syndrome	Article	2015	Kalume F., Oakley J.C., Westenbroek R.E., Gile J., de la Iglesia H.O., Scheuer T., Catterall W.A.	Neurobiology of Disease	77
22908258	Specific deletion of NaV1.1 sodium channels in inhibitory interneurons causes seizures and premature death in a mouse model of Dravet syndrome	Article	2012	Cheah C.S., Yu F.H., Westenbroek R.E., Kalume F.K., Oakley J.C., Potter G.B., Rubenstein J.L., Catterall W.A.	Proceedings of the National Academy of Sciences of the United States of America	109
25855492	Spreading depolarization in the brainstem mediates sudden cardiorespiratory arrest in mouse SUDEP models	Article	2015	Aiba I., Noebels J.L.	Science Translational Medicine	7
24434335	Strain- and age-dependent hippocampal neuron sodium currents correlate with epilepsy severity in Dravet syndrome mice	Article	2014	Mistry A.M., Thompson C.H., Miller A.R., Vanoye C.G., George Jr. A.L., Kearney J.A.	Neurobiology of Disease	65
23524959	Sudden death in epilepsy: Of mice and men	Article	2013	Friedman D., Chyou J., Devinsky O.	Journal of Clinical Investigation	123
23524966	Sudden unexpected death in a mouse model of Dravet syndrome	Article	2013	Kalume F., Westenbroek R.E., Cheah C.S., Yu F.H., Oakley J.C., Scheuer T., Catterall W.A.	Journal of Clinical Investigation	123
23424217	Synergistic GABA-enhancing therapy against seizures in a mouse model of dravet syndrome	Article	2013	Oakley J.C., Cho A.R., Cheah C.S., Scheuer T., Catterall W.A.	Journal of Pharmacology and Experimental Therapeutics	345
25042160	Tau reduction prevents disease in a mouse model of Dravet syndrome	Article	2014	Gheyara A.L., Ponnusamy R., Djukic B., Craft R.J., Ho K., Guo W., Finucane M.M., Sanchez P.E., Mucke L.	Annals of Neurology	76
32126198	Tau Reduction Prevents Key Features of Autism in Mouse Models	Article	2020	Tai C., Chang C.-W., Yu G.-Q., Lopez I., Yu X., Wang X., Guo W., Mucke L.	Neuron	106
19234123	Temperature- and age-dependent seizures in a mouse model of severe myoclonic epilepsy in infancy	Article	Proceedings of the National Academy of Sciences of the United States of America	106	106	106
33099130	Testing broad-spectrum and isoform-preferring HCN channel blockers for anticonvulsant properties in mice	Article	2020	Kharouf Q., Pinares-Garcia P., Romanelli M.N., Reid C.A.	Epilepsy Research	168
32184723	The Glucagon-Like Peptide-1 Analogue Liraglutide Reduces Seizures Susceptibility, Cognition Dysfunction and Neuronal Apoptosis in a Mouse Model of Dravet Syndrome	2020	Liu S	Front Pharmacol	Front Pharmacol	Front Pharmacol
1	The Glucagon-Like Peptide-1 Analogue Liraglutide Reduces Seizures Susceptibility, Cognition Dysfunction and Neuronal Apoptosis in a Mouse Model of Dravet Syndrome	Article	2020	Liu S., Jin Z., Zhang Y., Rong S., He W., Sun K., Wan D., Huo J., Xiao L., Li X., Ding N., Wang F., Sun T.	Frontiers in Pharmacology	11
34079465	The Heat Sensing Trpv1 Receptor Is Not a Viable Anticonvulsant Drug Target in the Scn1a (+/-) Mouse Model of Dravet Syndrome	2021	Satpute Janve V	Front Pharmacol	Front Pharmacol	Front Pharmacol
1	The Heat Sensing Trpv1 Receptor Is Not a Viable Anticonvulsant Drug Target in the Scn1a +/− Mouse Model of Dravet Syndrome	Article	2021	Satpute Janve V., Anderson L.L., Bahceci D., Hawkins N.A., Kearney J.A., Arnold J.C.	Frontiers in Pharmacology	12
29127345	The synthetic neuroactive steroid SGE-516 reduces seizure burden and improves survival in a Dravet syndrome mouse model	Article	2017	Hawkins N.A., Lewis M., Hammond R.S., Doherty J.J., Kearney J.A.	Scientific Reports	7
31022638	The therapeutic effect of stiripentol in Gabrg2 +/Q390X mice associated with epileptic encephalopathy	Article	2019	Warner T.A., Smith N.K., Kang J.-Q.	Epilepsy Research	154
1679748	Three brain sodium channel α-subunit genes are clustered on the proximal segment of mouse chromosome 2	Article	1991	Malo D., Schurr E., Dorfman J., Canfield V., Levenson R., Gros P.	Genomics	10
30984098	Time of Day and a Ketogenic Diet Influence Susceptibility to SUDEP in Scn1a (R1407X/+) Mice	2019	Teran FA	Front Neurol	Front Neurol	Front Neurol
1	Time of Day and a Ketogenic Diet Influence Susceptibility to SUDEP in Scn1aR1407X/+ Mice	Article	2019	Teran F.A., Kim Y., Crotts M.S., Bravo E., Emaus K.J., Richerson G.B.	Frontiers in Neurology	10
1	Transcriptome profiling in engrailed-2 mutant mice reveals common molecular pathways associated with autism spectrum disorders	Article	2013	Sgadò P., Provenzano G., Dassi E., Adami V., Zunino G., Genovesi S., Casarosa S., Bozzi Y.	Molecular Autism	4
34589280	Transfer of SCN1A to the brain of adolescent mouse model of Dravet syndrome improves epileptic, motor, and behavioral manifestations	2021	Mora-Jimenez L	Mol Ther Nucleic Acids	Mol Ther Nucleic Acids	Mol Ther Nucleic Acids
1	Transfer of SCN1A to the brain of adolescent mouse model of Dravet syndrome improves epileptic, motor, and behavioral manifestations	Article	2021	Mora-Jimenez L., Valencia M., Sanchez-Carpintero R., Tønnesen J., Fadila S., Rubinstein M., Gonzalez-Aparicio M., Bunuales M., Fernandez-Pierola E., Nicolas M.J., Puerta E., Miguelez C., Minguez P.G., Lumbreras S., Gonzalez-Aseguinolaza G., Ricobaraza A., Hernandez-Alcoceba R.	Molecular Therapy - Nucleic Acids	25
33676317	Two-photon calcium imaging of seizures in awake, head-fixed mice	Article	2021	Somarowthu A., Goff K.M., Goldberg E.M.	Cell Calcium	96
26819275	Unaltered Network Activity and Interneuronal Firing during Spontaneous Cortical Dynamics in Vivo in a Mouse Model of Severe Myoclonic Epilepsy of Infancy	Article	2016	De Stasi A.M., Farisello P., Marcon I., Cavallari S., Forli A., Vecchia D., Losi G., Mantegazza M., Panzeri S., Carmignoto G., Bacci A., Fellin T.	Cerebral Cortex	26
31282864	Vasoactive intestinal peptide-expressing interneurons are impaired in a mouse model of dravet syndrome	Article	2019	Goff K.M., Goldberg E.M.	eLife	8
32807948	Viral manipulation of functionally distinct interneurons in mice, non-human primates and humans	Article	2020	Vormstein-Schneider D., Lin J.D., Pelkey K.A., Chittajallu R., Guo B., Arias-Garcia M.A., Allaway K., Sakopoulos S., Schneider G., Stevenson O., Vergara J., Sharma J., Zhang Q., Franken T.P., Smith J., Ibrahim L.A., M astro K.J., Sabri E., Huang S., Favuzzi E., Burbridge T., Xu Q., Guo L., Vogel I., Sanchez V., Saldi G.A., Gorissen B.L., Yuan X., Zaghloul K.A., Devinsky O., Sabatini B.L., Batista…	Nature Neuroscience	23
23597049	Peripheral nerve injury is accompanied by chronic transcriptome-wide changes in the mouse prefrontal cortex	2013	Alvarado S	Mol Pain	Mol Pain	Mol Pain
28428755	Pharmacological Analysis of the Anti-epileptic Mechanisms of Fenfluramine in scn1a Mutant Zebrafish	2017	Sourbron J	Front Pharmacol	Front Pharmacol	Front Pharmacol
34335252	Perampanel Reduces Hyperthermia-Induced Seizures in Dravet Syndrome Mouse Model	2021	Ho SY	Front Pharmacol	Front Pharmacol	Front Pharmacol
34510432	Soticlestat, a novel cholesterol 24-hydroxylase inhibitor, reduces seizures and premature death in Dravet syndrome mice	2021	Hawkins NA	Epilepsia	Epilepsia	Epilepsia
1	Perampanel Reduces Hyperthermia-Induced Seizures in Dravet Syndrome Mouse Model	Article	2021	Ho S.-Y., Lin L., Chen I.-C., Tsai C.-W., Chang F.-C., Liou H.-H.	Frontiers in Pharmacology	12
1	Peripheral nerve injury is accompanied by chronic transcriptome-wide changes in the mouse prefrontal cortex	Article	2013	Alvarado S., Tajerian M., Millecamps M., Suderman M., Stone L.S., Szyf M.	Molecular Pain	9
1	Pharmacological analysis of the anti-epileptic mechanisms of fenfluramine in scn1a mutant zebrafish	Article	2017	Sourbron J., Smolders I., de Witte P., Lagae L.	Frontiers in Pharmacology	8
1	Soticlestat, a novel cholesterol 24-hydroxylase inhibitor, reduces seizures and premature death in Dravet syndrome mice	Article	2021	Hawkins N.A., Jurado M., Thaxton T.T., Duarte S.E., Barse L., Tatsukawa T., Yamakawa K., Nishi T., Kondo S., Miyamoto M., Abrahams B.S., During M.J., Kearney J.A.	Epilepsia
15878599	Down-regulation of the sodium channel Na(v)1.1 alpha-subunit following focal ischemic brain injury in rats: in situ hybridization and immunohistochemical analysis	2005	2005	Life Sci	Life Sci	Life Sci	Yao C
16815341	Immunolocalization of NaV1.2 channel subtypes in rat and cat brain and spinal cord with high affinity antibodies	2006	2006	Brain Res	Brain Res	Brain Res	Jarnot M
16822974	Impaired firing and cell-specific compensation in neurons lacking nav1.6 sodium channels	2006	2006	J Neurosci	J Neurosci	J Neurosci	Van Wart A
16966585	Localization of Na+ channel isoforms at the atrioventricular junction and atrioventricular node in the rat	2006	2006	Circulation	Circulation	Circulation	Yoo S
12835116	The sodium channel blocker RS100642 reverses down-regulation of the sodium channel alpha-subunit Na(v) 1.1 expression caused by transient ischemic brain injury in rats	Article	2003	Neurotox Res	Neurotox Res	Neurotox Res	Yao C
17273863	Downregulation of neuronal sodium channel subunits Nav1.1 and Nav1.6 in the sinoatrial node from volume-overloaded heart failure rat	2007	2007	Pflugers Arch	Pflugers Arch	Pflugers Arch	Du Y
17709186	Expression of Nav1.1 in rat retinal AII amacrine cells	2007	2007	Neurosci Lett	Neurosci Lett	Neurosci Lett	Kaneko Y
17259145	[Expression and function of voltage-gated Na+ channel isoforms in rat sinoatrial node]	2007	2007	Nan Fang Yi Ke Da Xue Xue Bao	Nan Fang Yi Ke Da Xue Xue Bao	Nan Fang Yi Ke Da Xue Xue Bao	Huang X
18070091	Early treatment suppresses the development of spike-wave epilepsy in a rat model	2008	2008	Epilepsia	Epilepsia	Epilepsia	Blumenfeld H
18158113	Voltage-gated sodium channel Nav1.1, Nav1.3 and beta1 subunit were up-regulated in the hippocampus of spontaneously epileptic rat	2008	2008	Brain Res Bull	Brain Res Bull	Brain Res Bull	Guo F
19765660	Voltage-gated sodium channel expression in rat spiral ganglion neurons	2009	2009	Mol Cell Neurosci	Mol Cell Neurosci	Mol Cell Neurosci	Fryatt AG
19703358	Effect of electroacupuncture on the expression of Nav1.1 in rat after acute cerebral ischemia	2010	2010	Neurol Res	Neurol Res	Neurol Res	Ren L
20483028	Effect of electroacupuncture therapy on the expression of Na(v)1.1 and Na(v)1.6 in rat after acute cerebral ischemia	2010	2010	Neurol Res	Neurol Res	Neurol Res	Ren L
21303679	Comparative study of voltage-gated sodium channel α-subunits in non-overlapping four neuronal populations in the rat dorsal root ganglion	2011	2011	Neurosci Res	Neurosci Res	Neurosci Res	Fukuoka T
23886654	Expression of sodium channel α subunits 1.1, 1.2 and 1.6 in rat hippocampus after kainic acid-induced epilepsy	2013	2013	Epilepsy Res	Epilepsy Res	Epilepsy Res	Qiao X
26542295	Characterization of maturation of neuronal voltage-gated sodium channels SCN1A and SCN8A in rat myocardium	2015	2015	Mol Cell Pediatr	Mol Cell Pediatr	Mol Cell Pediatr	Krause U
20410126	A missense mutation of the gene encoding voltage-dependent sodium channel (NaV1.1) confers susceptibility to febrile seizures in rats	Article	2010	Mashimo T., Ohmori I., Ouchida M., Ohno Y., Tsurumi T., Miki T., Wakamori M., Ishihara S., Yoshida T., Takizawa A., Kato M., Hirabayashi M., Sasa M., Mori Y., Serikawa T.	Journal of Neuroscience	30
29522854	Chronic Amyloid β Oligomer Infusion Evokes Sustained Inflammation and Microglial Changes in the Rat Hippocampus via NLRP3	Article	2019	Fekete C., Vastagh C., Dénes Á., Hrabovszky E., Nyiri G., Kalló I., Liposits Z., Sárvári M.	Neuroscience	405
25453779	De novo expression of Nav1.7 in injured putative proprioceptive afferents: Multiple tetrodotoxin-sensitive sodium channels are retained in the rat dorsal root after spinal nerve ligation	Article	2015	Fukuoka T., Miyoshi K., Noguchi K.	Neuroscience	284
1	Effect and mechanism of carbamazepine on SCN1A expression in temporal lobe epilepsy rats	Article	2021	Zhang L., Feng Y.J., Li W., Yi Y.J., Wang J., Wang X.Y.	Indian Journal of Pharmaceutical Sciences	83
11494332	Expression profiles of voltage-gated Na+ channel α-subunit genes in rat and human prostate cancer cell lines	Article	2001	Diss J.K.J., Archer S.N., Hirano J., Fraser S.P., Djamgoz M.B.A.	Prostate	48
32418750	GABRG2 Deletion Linked to Genetic Epilepsy with Febrile Seizures Plus Affects the Expression of GABAA Receptor Subunits and Other Genes at Different Temperatures	Article	2020	Li X., Guo S., Liu K., Zhang C., Chang H., Yang W., Rong S., Hu Q., Cui J., Wang F., Sun T.	Neuroscience	438
32544858	Generation of corrected-hiPSC (USTCi001-A-1) from epilepsy patient iPSCs using TALEN-mediated editing of the SCN1A gene	Article	2020	Zhao H., He L., Li S., Huang H., Tang F., Han X., Lin Z., Tian C., Huang R., Zhou P., Huang J., Deng S., Li Z.	Stem Cell Research	46
29453127	Generation of D1-1 TALEN isogenic control cell line from Dravet syndrome patient iPSCs using TALEN-mediated editing of the SCN1A gene	Article	2018	Tanaka Y., Sone T., Higurashi N., Sakuma T., Suzuki S., Ishikawa M., Yamamoto T., Mitsui J., Tsuji H., Okano H., Hirose S.	Stem Cell Research	28
33370868	Generation of iPSC lines from two patients affected by febrile seizure due to inherited missense mutation in SCN1A gene	Article	2020	Scalise S., Scaramuzzino L., Lucchino V., Esposito C., Malatesta P., Grillone K., Perrotti N., Cuda G., Parrotta E.I.	Stem Cell Research	49
34247112	Generation of SCN1A Knock out induced pluripotent stem cell (iPSC) line	Article	2021	Shan W., Yang X., Ren Q., Wang Q.	Stem Cell Research	55
24953032	Generation of the SCN1A epilepsy mutation in hiPS cells using the TALEN technique	Article	2014	Chen W., Liu J., Zhang L., Xu H., Guo X., Deng S., Liu L., Yu D., Chen Y., Li Z.	Scientific Reports	4
31400703	Generation of three human induced pluripotent stem cell (iPSC) lines from three patients with Dravet syndrome carrying distinct SCN1A gene mutations	Article	2019	Schuster J., Fatima A., Sobol M., Norradin F.H., Laan L., Dahl N.	Stem Cell Research	39
22920678	High-frequency EEG oscillations in hyperthermia-induced seizures of Scn1a mutant rats	Article	2013	Kobayashi K., Ohmori I., Hayashi K., Kitagawa Y., Ouchida M., Inoue T., Ohtsuka Y.	Epilepsy Research	103
25142193	Interleukin-6 inhibits voltage-gated sodium channel activity of cultured rat spinal cord neurons	Article	2014	Li X., Chen W., Sheng J., Cao D., Wang W.	Acta Neuropsychiatrica	26
19306853	Long-term increasing co-localization of SCN8A and ankyrin-G in rat hippocampal cornu ammonis 1 after pilocarpine induced status epilepticus	Article	2009	Chen Z., Chen S., Chen L., Zhou J., Dai Q., Yang L., Li X., Zhou L.	Brain Research	1270
30885820	MicroRNA-132 regulates total protein of Nav1.1 and Nav1.2 in the hippocampus and cortex of rat with chronic cerebral hypoperfusion	Article	2019	Hu X.-L., Wang X.-X., Zhu Y.-M., Xuan L.-N., Peng L.-W., Liu Y.-Q., Yang H., Yang C., Jiao L., Hang P.-Z., Sun L.-H.	Behavioural Brain Research	366
26259688	MicroRNA-9 induces defective trafficking of Nav1.1 and Nav1.2 by targeting Navβ2 protein coding region in rat with chronic brain hypoperfusion	Article	2015	Sun L.-H., Yan M.-L., Hu X.-L., Peng L.-W., Che H., Bao Y.-N., Guo F., Liu T., Chen X., Zhang R., Ban T., Wang N., Liu H.-L., Hou X., Ai J.	Molecular Neurodegeneration	10
33045260	Scn1a and Cacna1a mutations mutually alter their original phenotypes in rats	Article	2020	Ohmori I., Kobayashi K., Ouchida M.	Neurochemistry International	141
20707984	Scn1a missense mutation impairs GABAA receptor-mediated synaptic transmission in the rat hippocampus	Article	2010	Ohno Y., Sofue N., Ishihara S., Mashimo T., Sasa M., Serikawa T.	Biochemical and Biophysical Research Communications	400
28758202	Sodium channel subtypes are differentially localized to pre- and post-synaptic sites in rat hippocampus	Article	2017	Johnson K.W., Herold K.F., Milner T.A., Hemmings H.C., Jr., Platholi J.	Journal of Comparative Neurology	525
26790420	Src family tyrosine kinase inhibitors suppress Nav1.1 expression in cultured rat spiral ganglion neurons	Article	2016	Chen H., Zeng Q., Yao C., Cai Z., Wei T., Huang Z., Su J.	Journal of Comparative Physiology A: Neuroethology, Sensory, Neural, and Behavioral Physiology	202
21480876	Therapy for hyperthermia-induced seizures in Scn1a mutant rats	Article	2011	Hayashi K., Ueshima S., Ouchida M., Mashimo T., Nishiki T., Sendo T., Serikawa T., Matsui H., Ohmori I.	Epilepsia	52
26995749	β1-Adrenergic blocker bisoprolol reverses down-regulated ion channels in sinoatrial node of heart failure rats	Article	2016	Du Y., Zhang J., Xi Y., Wu G., Han K., Huang X., Ma A., Wang T.	Journal of Physiology and Biochemistry	72
17629415	Generalized epilepsy with febrile seizures plus-associated sodium channel beta1 subunit mutations severely reduce beta subunit-mediated modulation of sodium channel function	Article	2007	Neuroscience	Neuroscience	Neuroscience	Xu R
17228331	Impaired firing and sodium channel function in CA1 hippocampal interneurons after transient cerebral ischemia	Article	2007	J Cereb Blood Flow Metab	J Cereb Blood Flow Metab	J Cereb Blood Flow Metab	Zhan RZ
17111377	Polarized distribution of ion channels within microdomains of the axon initial segment	Article	2007	J Comp Neurol	J Comp Neurol	J Comp Neurol	Van Wart A
18079688	Voltage-gated sodium channel alpha-subunits Na(v)1.1, Na(v)1.2, and Na(v)1.6 in the distal mammalian retina	Article	2007	Mol Vis	Mol Vis	Mol Vis	Mojumder DK
19118165	Cell-type-dependent molecular composition of the axon initial segment	Article	2008	J Neurosci	J Neurosci	J Neurosci	Lorincz A
18621130	Nav1.1 is predominantly expressed in nodes of Ranvier and axon initial segments	Article	2008	Mol Cell Neurosci	Mol Cell Neurosci	Mol Cell Neurosci	Duflocq A
17964804	Transcriptional and functional profiles of voltage-gated Na(+) channels in injured and non-injured DRG neurons in the SNI model of neuropathic pain	Article	2008	Mol Cell Neurosci	Mol Cell Neurosci	Mol Cell Neurosci	Berta T
19115387	Sodium channel activity modulates multiple functions in microglia	Article	2009	Glia	Glia	Glia	Black JA
19592486	Synthesis, solution structure, and phylum selectivity of a spider delta-toxin that slows inactivation of specific voltage-gated sodium channel subtypes	Article	2009	J Biol Chem	J Biol Chem	J Biol Chem	Yamaji N
20147455	Astrocytes within multiple sclerosis lesions upregulate sodium channel Nav1.5	Article	2010	Brain	Brain	Brain	Black JA
21833183	Propranolol blocks cardiac and neuronal voltage-gated sodium channels	Article	2010	Front Pharmacol	Front Pharmacol	Front Pharmacol	Wang DW
21994381	Action potential generation at an axon initial segment-like process in the axonless retinal AII amacrine cell	Article	2011	J Neurosci	J Neurosci	J Neurosci	Wu C
21890636	Alternative splicing modulates inactivation of type 1 voltage-gated sodium channels by toggling an amino acid in the first S3-S4 linker	Article	2011	J Biol Chem	J Biol Chem	J Biol Chem	Fletcher EV
21726526	Calmodulin and calcium differentially regulate the neuronal Nav1.1 voltage-dependent sodium channel	Article	2011	Biochem Biophys Res Commun	Biochem Biophys Res Commun	Biochem Biophys Res Commun	Gaudioso C
21566136	Identification of novel interaction sites that determine specificity between fibroblast growth factor homologous factors and voltage-gated sodium channels	Article	2011	J Biol Chem	J Biol Chem	J Biol Chem	Wang C
21734302	Molecular microdomains in a sensory terminal, the vestibular calyx ending	Article	2011	J Neurosci	J Neurosci	J Neurosci	Lysakowski A
21463271	Severe myoclonic epilepsy in infancy (Dravet syndrome) 30 years later	Review	2011	Epilepsia	Epilepsia	Epilepsia	Dravet C
22240828	[Dravet syndrome as a cause of epilepsy and learning disability]	Review	2012	Tidsskr Nor Laegeforen	Tidsskr Nor Laegeforen	Tidsskr Nor Laegeforen	Lund C
22541439	Inhibitory interneuron deficit links altered network activity and cognitive dysfunction in Alzheimer model	Article	2012	Cell	Cell	Cell	Verret L
24850863	Prokaryotic NavMs channel as a structural and functional model for eukaryotic sodium channel antagonism	2014	2014	Proc Natl Acad Sci U S A	Proc Natl Acad Sci U S A	Proc Natl Acad Sci U S A	Bagnéris C
26150927	The Nav channel bench series: Plasmid preparation	2014	2014	MethodsX	MethodsX	MethodsX	Feldman DH
32259093	Venom Peptides with Dual Modulatory Activity on the Voltage-Gated Sodium Channel Na(V)1.1 Provide Novel Leads for Development of Antiepileptic Drugs	2019	2019	ACS Pharmacol Transl Sci	ACS Pharmacol Transl Sci	ACS Pharmacol Transl Sci	Chow CY
32599563	Establishment of human induced pluripotent stem cells derived from skin cells of a patient with Dravet syndrome	2020	2020	Stem Cell Res	Stem Cell Res	Stem Cell Res	Kimura Y
32508047	Identification of potential candidate genes and pathways in atrioventricular nodal reentry tachycardia by whole-exome sequencing	2020	2020	Clin Transl Med	Clin Transl Med	Clin Transl Med	Luo R
32454875	Network Pharmacology-Based Approach to Investigate the Mechanisms of Mahai Capsules in the Treatment of Cardiovascular Diseases	2020	2020	Evid Based Complement Alternat Med	Evid Based Complement Alternat Med	Evid Based Complement Alternat Med	Shi M
34406040	CRISPRa-Mediated Upregulation of scn1laa During Early Development Causes Epileptiform Activity and dCas9-Associated Toxicity	2021	2021	CRISPR J	CRISPR J	CRISPR J	Weuring WJ
34546973	Hyperexcitable interneurons trigger cortical spreading depression in an Scn1a migraine model	2021	2021	J Clin Invest	J Clin Invest	J Clin Invest	Auffenberg E
33876820	UNC13B variants associated with partial epilepsy with favourable outcome	2021	2021	Brain	Brain	Brain	Wang J
18755274	A CACNB4 mutation shows that altered Cav2.1 function may be a genetic modifier of severe myoclonic epilepsy in infancy	Article	2008	Ohmori I., Ouchida M., Miki T., Mimaki N., Kiyonaka S., Nishiki T., Tomizawa K., Mori Y., Matsui H.	Neurobiology of Disease	32
33189042	A heterozygous SCN1A (c.A5768G/+) mutant human induced pluripotent stem cell line (USTCi002-A) generated using TALEN-mediated precise gene editing	Article	2020	Zhao H., Li S., Lin Z., He L., Deng W., Han X., Tang F., Cheng N., Zhou P., Huang R., Deng S., Huang J., Li Z.	Stem Cell Research	49
23639079	A human Dravet syndrome model from patient induced pluripotent stem cells	Article	2013	Higurashi N., Uchida T., Lossin C., Misumi Y., Okada Y., Akamatsu W., Imaizumi Y., Zhang B., Nabeshima K., Mori M.X., Katsurabayashi S., Shirasaka Y., Okano H., Hirose S.	Molecular Brain	6
23055484	A knock-in model of human epilepsy in Drosophila reveals a novel cellular mechanism associated with heat-induced seizure	Article	2012	Sun L., Gilligan J., Staber C., Schutte R.J., Nguyen V., O'Dowd D.K., Reenan R.	Journal of Neuroscience	32
32335140	A selective NaV1.1 activator with potential for treatment of Dravet syndrome epilepsy	Article	2020	Chow C.Y., Chin Y.K.Y., Ma L., Undheim E.A.B., Herzig V., King G.F.	Biochemical Pharmacology	181
28635024	A small molecule activator of Nav1.1 channels increases fast-spiking interneuron excitability and GABAergic transmission in vitro and has anti-convulsive effects in vivo	Article	2017	Frederiksen K., Lu D., Yang J., Jensen H.S., Bastlund J.F., Larsen P.H., Liu H., Crestey F., Dekermendjian K., Badolo L., Laursen M., Hougaard C., Yang C., Svenstrup N., Grunnet M.	European Journal of Neuroscience	46
11118488	A sodium channel mutation causing epilepsy in man exhibits subtle defects in fast inactivation and activation in vitro	Article	2000	Alekov A.K., Rahman Md.M., Mitrovic N., Lehmannhorn F., Lerche H.	Journal of Physiology	529
32581296	A Study among the Genotype, Functional Alternations, and Phenotype of 9 SCN1A Mutations in Epilepsy Patients	Article	2020	Kluckova D., Kolnikova M., Lacinova L., Jurkovicova-Tarabova B., Foltan T., Demko V., Kadasi L., Ficek A., Soltysova A.	Scientific Reports	10
30659983	A two-hit story: Seizures and genetic mutation interaction sets phenotype severity in SCN1A epilepsies	Article	2019	Salgueiro-Pereira A.R., Duprat F., Pousinha P.A., Loucif A., Douchamps V., Regondi C., Ayrault M., Eugie M., Stunault M.I., Escayg A., Goutagny R., Gnatkovsky V., Frassoni C., Marie H., Bethus I., Mantegazza M.	Neurobiology of Disease	125
34411648	ABCB1 c.3435C > T and EPHX1 c.416A > G polymorphisms influence plasma carbamazepine concentration, metabolism, and pharmacoresistance in epileptic patients	Article	2021	Zhang M.-L., Chen X.-L., Bai Z.-F., Zhao X., Li W.-X., Wang X.-Y., Zhang H., Chen X.-F., Zhang S.-Q., Tang J.-F., Xiao X.-H., Zhao Y.-L.	Gene	805
29578003	Abnormal changes in voltage-gated sodium channels subtypes NaV1.1, NaV1.2, NaV1.3, NaV1.6 and CaM/CaMKII pathway in low-grade astrocytoma	Article	2018	Guan G., Zhao M., Xu X., Boczek T., Mao X., Li Z., Gao Q., Li J., Zhao D., Niu W., Lei L., Guo F.	Neuroscience Letters	674
24155976	Altered Cardiac Electrophysiology and SUDEP in a Model of Dravet Syndrome	Article	2013	Auerbach D.S., Jones J., Clawson B.C., Offord J., Lenk G.M., Ogiwara I., Yamakawa K., Meisler M.H., Parent J.M., Isom L.L.	PLoS ONE	8
20100831	Altered function of the SCN1A voltage-gated sodium channel leads to γ-aminobutyric acid-ergic (GABAergic) interneuron abnormalities	Article	2010	Martin M.S., Dutt K., Papale L.A., Dubé C.M., Dutton S.B., De Haan G., Shankar A., Tufik S., Meisler M.H., Baram T.Z., Goldin A.L., Escayg A.	Journal of Biological Chemistry	285
23945787	Altered PKA modulation in the Nav1.1 Epilepsy variant I1656M	Article	2013	Liu S., Zheng P.	Journal of Neurophysiology	110
11860490	AMPA receptor activation induces association of G-beta protein with the alpha subunit of the sodium channel in neurons	Article	2001	Eur J Neurosci	Eur J Neurosci	Eur J Neurosci	Marin P
26410685	An Scn1a epilepsy mutation in Scn8a alters seizure susceptibility and behavior	Article	2016	Makinson C.D., Dutt K., Lin F., Papale L.A., Shankar A., Barela A.J., Liu R., Goldin A.L., Escayg A.	Experimental Neurology	275
30605686	Augmented Reticular Thalamic Bursting and Seizures in Scn1a-Dravet Syndrome	Article	2019	Ritter-Makinson S., Clemente-Perez A., Higashikubo B., Cho F.S., Holden S.S., Bennett E., Chkaidze A., Eelkman Rooda O.H.J., Cornet M.-C., Hoebeek F.E., Yamakawa K., Cilio M.R., Delord B., Paz J.T.	Cell Reports	26
29728980	Backbone resonance assignments of complexes of apo human calmodulin bound to IQ motif peptides of voltage-dependent sodium channels NaV1.1, NaV1.4 and NaV1.7	Article	2018	Isbell H.M., Kilpatrick A.M., Lin Z., Mahling R., Shea M.A.	Biomolecular NMR Assignments	12
30146492	Channelopathy as a SUDEP Biomarker in Dravet Syndrome Patient-Derived Cardiac Myocytes	Article	2018	Frasier C.R., Zhang H., Offord J., Dang L.T., Auerbach D.S., Shi H., Chen C., Goldman A.M., Eckhardt L.L., Bezzerides V.J., Parent J.M., Isom L.L.	Stem Cell Reports	11
31346614	Circadian regulation of sleep in a pre-clinical model of Dravet syndrome: Dynamics of sleep stage and siesta re-entrainment	Article	2019	Sanchez R.E.A., Bussi I.L., Ben-Hamo M., Caldart C.S., Catterall W.A., De La Iglesia H.O.	Sleep	42
28073790	Clemizole and modulators of serotonin signalling suppress seizures in Dravet syndrome	Article	2017	Griffin A., Hamling K.R., Knupp K., Hong S., Lee L.P., Baraban S.C.	Brain	140
34324871	Clonazepam attenuates neurobehavioral abnormalities in offspring exposed to maternal immune activation by enhancing GABAergic neurotransmission	Article	2021	Yang Y., Wang B., Zhong Z., Chen H., Ding W., Hoi M.P.M.	Biochemical Pharmacology	192
26978272	Cognitive deficits associated with Nav1.1 alterations: Involvement of neuronal firing dynamics and oscillations	Article	2016	Bender A.C., Luikart B.W., Lenck-Santini P.-P.	PLoS ONE	11
33712547	Comparative structural analysis of human Nav1.1 and Nav1.5 reveals mutational hotspots for sodium channelopathies	Article	2021	Pan X., Li Z., Jin X., Zhao Y., Huang G., Huang X., Shen Z., Cao Y., Dong M., Lei J., Yan N.	Proceedings of the National Academy of Sciences of the United States of America	118
31786370	Comparisons of dual isogenic human iPSC pairs identify functional alterations directly caused by an epilepsy associated SCN1A mutation	Article	2020	Xie Y., Ng N.N., Safrina O.S., Ramos C.M., Ess K.C., Schwartz P.H., Smith M.A., O'Dowd D.K.	Neurobiology of Disease	134
28007400	Consequences of acute Nav1.1 exposure to deltamethrin	Article	2017	James T.F., Nenov M.N., Tapia C.M., Lecchi M., Koshy S., Green T.A., Laezza F.	NeuroToxicology	60
23965409	Correlations in timing of sodium channel expression, epilepsy, and sudden death in Dravet syndrome	Article	2013	Cheah C.S., Westenbroek R.E., Roden W.H., Kalume F., Oakley J.C., Jansen L.A., Catterall W.A.	Channels	7
26731440	CRISPR/Cas9 facilitates investigation of neural circuit disease using human iPSCs: Mechanism of epilepsy caused by an SCN1A loss-of-function mutation	Article	2016	Liu J., Gao C., Chen W., Ma W., Li X., Shi Y., Zhang H., Zhang L., Long Y., Xu H., Guo X., Deng S., Yan X., Yu D., Pan G., Chen Y., Lai L., Liao W., Li Z.	Translational Psychiatry	6
	CRISPRa-Mediated Upregulation of scn1laa during Early Development Causes Epileptiform Activity and dCas9-Associated Toxicity	Article	2021	Weuring W.J., Dilevska I., Hoekman J., Van De Vondervoort J., Koetsier M., Van 'T Slot R.H., Braun K.P.J., Koeleman B.P.C.	CRISPR Journal	4
33460646	Cryptic prokaryotic promoters explain instability of recombinant neuronal sodium channels in bacteria	Article	2021	DeKeyser J.-M., Thompson C.H., George A.L., Jr.	Journal of Biological Chemistry	296
30605865	Curcumin's antiepileptic effect, and alterations in Na v 1.1 and Na v 1.6 expression in iron-induced epilepsy	Article	2019	Kumar V., Prakash C., Singh R., Sharma D.	Epilepsy Research	150
34002394	Development of an antiseizure drug screening platform for Dravet syndrome at the NINDS contract site for the Epilepsy Therapy Screening Program	Article	2021	Pernici C.D., Mensah J.A., Dahle E.J., Johnson K.J., Handy L., Buxton L., Smith M.D., West P.J., Metcalf C.S., Wilcox K.S.	Epilepsia	62
28711494	Development of membrane ion channels during neural differentiation from human embryonic stem cells	Article	Biochemical and Biophysical Research Communications	491	491	491
31928904	Differential excitatory vs inhibitory SCN expression at single cell level regulates brain sodium channel function in neurodevelopmental disorders	Article	2020	Du J., Simmons S., Brunklaus A., Adiconis X., Hession C.C., Fu Z., Li Y., Shema R., Møller R.S., Barak B., Feng G., Meisler M., Sanders S., Lerche H., Campbell A.J., McCarroll S., Levin J.Z., Lal D.	European Journal of Paediatric Neurology	24
31415810	DNA methylation microarray uncovers a permissive methylome for cardiomyocyte differentiation in human mesenchymal stem cells	Article	Genomics	112	112	112
12835125	Down regulation of sodium channel Na(v)1.1 expression by veratridine and its reversal by a novel sodium channel blocker, RS100642, in primary neuronal cultures	Article	2003	Neurotox Res	Neurotox Res	Neurotox Res	Dave JR
24990319	Electrophysiological Differences between the Same Pore Region Mutation in SCN1A and SCN3A	Article	2015	Chen Y.-J., Shi Y.-W., Xu H.-Q., Chen M.-L., Gao M.-M., Sun W.-W., Tang B., Zeng Y., Liao W.-P.	Molecular Neurobiology	51
11422459	Enhanced inactivation and acceleration of activation of the sodium channel associated with epilepsy in man	Article	2001	Alekov A.K., Masmudur Rahman M.D., Mitrovic N., Lehmann-Horn F., Lerche H.	European Journal of Neuroscience	13
14672992	Epilepsy-Associated Dysfunction in the Voltage-Gated Neuronal Sodium Channel SCN1A	Article	2003	Lossin C., Rhodes T.H., Desai R.R., Vanoye C.G., Wang D., Carniciu S., Devinsky O., George Jr. A.L.	Journal of Neuroscience	23
	Establishment of human induced pluripotent stem cells derived from skin cells of a patient with Dravet syndrome	Article	2020	Kimura Y., Tanaka Y., Shirasu N., Yasunaga S., Higurashi N., Hirose S.	Stem Cell Research	47
25590135	Evaluation of the effect of c.2946 + 1G > T mutation on splicing in the SCN1A gene	Article	2015	Ben Mahmoud A., Ben Mansour R., Driss F., Baklouti-Gargouri S., Siala O., Mkaouar-Rebai E., Fakhfakh F.	Computational Biology and Chemistry	54
	Expecting the unexpected: Lack of in vivo network defects in an Scn1a model of Dravet Syndrome	Article	2016	Hull J.M., Isom L.L.	Epilepsy Currents	16
31375088	Exploring the molecular basis of neuronal excitability in a vocal learner	Article	2019	Friedrich S.R., Lovell P.V., Kaser T.M., Mello C.V.	BMC Genomics	20
23318929	Focal Scn1a knockdown induces cognitive impairment without seizures	Article	2013	Bender A.C., Natola H., Ndong C., Holmes G.L., Scott R.C., Lenck-Santini P.-P.	Neurobiology of Disease	54
25725421	Functional and structural deficits of the dentate gyrus network coincide with emerging spontaneous seizures in an Scn1a mutant dravet syndrome model during development	Article	2015	Tsai M.-S., Lee M.-L., Chang C.-Y., Fan H.-H., Yu I.-S., Chen Y.-T., You J.-Y., Chen C.-Y., Chang F.-C., Hsiao J.H., Khorkova O., Liou H.-H., Yanagawa Y., Lee L.-J., Lin S.-W.	Neurobiology of Disease	77
12576172	Functional characterization of the D188V mutation in neuronal voltage-gated sodium channel causing generalized epilepsy with febrile seizures plus (GEFS)	Article	2003	Cossette P., Loukas A., Lafrenière R.G., Rochefort D., Harvey-Girard E., Ragsdale D.S., Dunn R.J., Rouleau G.A.	Epilepsy Research	53
11567038	Functional effects of two voltage-gated sodium channel mutations that cause generalized epilepsy with febrile seizures plus type 2	Article	2001	Spampanato J., Escayg A., Meisler M.H., Goldin A.L.	Journal of Neuroscience	21
	Gene expression profiling in genetic animal models of provide elements to unveil the molecular mechanisms underlying epileptogenesis in rodents	Article	2012	Matos A.H.B., Pascoal V.D.B., Nascimento D.R., Martins S., Rocha C.S., Vasconcellos J.F., Chamma M.T., Maurer-Morelli C.V., Martins A.S., Valle A.C., Godard A.L.B., Lopes Cendes I.	Journal of Epilepsy and Clinical Neurophysiology	18
26656780	Hlf is a genetic modifier of epilepsy caused by voltage-gated sodium channel mutations	Article	2016	Hawkins N.A., Kearney J.A.	Epilepsy Research	119
26182346	Human Nav1.6 channels generate larger resurgent currents than human Nav1.1 channels, but the Navβ4 peptide does not protect either isoform from use-dependent reduction	Article	2015	Patel R.R., Barbosa C., Xiao Y., Cummins T.R.	PLoS ONE	10
18655196	Identification of the promoter region and the 5′-untranslated exons of the human voltage-gated sodium channel Nav1.1 gene (SCN1A) and enhancement of gene expression by the 5′-untranslated exons	Article	2008	Long Y.-S., Zhao Q.-H., Su T., Cai Y.-L., Zeng Y., Shi Y.-W., Yi Y.-H., Chang H.-H., Liao W.-P.	Journal of Neuroscience Research	86
17065438	Impaired inactivation gate stabilization predicts increased persistent current for an epilepsy-associated SCN1A mutation	Article	2006	Kahlig K.M., Misra S.N., George Jr. A.L.	Journal of Neuroscience	26
31537705	Impairment of sharp-wave ripples in a murine model of dravet syndrome	Article	2019	Cheah C.S., Lundstrom B.N., Catteral W.A., Oakley J.C.	Journal of Neuroscience	39
14702334	Increased Neuronal Firing in Computer Simulations of Sodium Channel Mutations That Cause Generalized Epilepsy with Febrile Seizures Plus	Article	2004	Spampanato J., Aradi I., Soltesz I., Goldin A.L.	Journal of Neurophysiology	91
23375560	Inhalation of 10% carbon dioxide rapidly terminates Scn1a mutation-related hyperthermia-induced seizures	Article	2013	Ohmori I., Hayashi K., Wang H., Ouchida M., Fujita N., Inoue T., Michiue H., Nishiki T., Matsui H.	Epilepsy Research	105
30219789	Inhibitory effects of cannabidiol on voltage-dependent sodium currents	Article	2019	Ghovanloo M.-R., Shuart N.G., Mezeyova J., Dean R.A., Ruben P.C., Goodchild S.J.	Journal of Biological Chemistry	293
31186344	Investigating the therapeutic mechanism of cannabidiol in a human induced pluripotent stem cell (iPSC)-based model of Dravet syndrome	Article	2018	Sun Y., Dolmetsch R.E.	Cold Spring Harbor Symposia on Quantitative Biology	83
24805083	Knock-in model of Dravet syndrome reveals a constitutive and conditional reduction in sodium current	Article	2014	Schutte R.J., Schutte S.S., Algara J., Barragan E.V., Gilligan J., Staber C., Savva Y.A., Smith M.A., Reenan R., O'Dowd D.K.	Journal of Neurophysiology	112
25154505	Methylphenidate improves learning impairments and hyperthermia-induced seizures caused by an Scn1a mutation	Article	2014	Ohmori I., Kawakami N., Liu S., Wang H., Miyazaki I., Asanuma M., Michiue H., Matsui H., Mashimo T., Ouchida M.	Epilepsia	55
23773995	Modeling Dravet syndrome using induced pluripotent stem cells (iPSCs) and directly converted neurons	Article	2013	Jiao J., Yang Y., Shi Y., Chen J., Gao R., Fan Y., Yao H., Liao W., Sun X.-F., Gao S.	Human Molecular Genetics	22
34314446	Modeling NaV1.1/SCN1A sodium channel mutations in a microcircuit with realistic ion concentration dynamics suggests differential GABAergic mechanisms leading to hyperexcitability in epilepsy and hemiplegic migraine	Article	2021	Lemaire L., Desroches M., Krupa M., Pizzamiglio L., Scalmani P., Mantegazza M.	PLoS Computational Biology	17
17928445	Modulatory proteins can rescue a trafficking defective epileptogenic Nav1.1 Na+ channel mutant	Article	2007	Rusconi R., Scalmani P., Cassulini R.R., Giunti G., Gambardella A., Franceschetti S., Annesi G., Wanke E., Mantegazza M.	Journal of Neuroscience	27
12086636	Molecular basis of an inherited epilepsy	Article	2002	Lossin C., Wang D.W., Rhodes T.H., Vanoye C.G., George A.L., Jr.	Neuron	34
20590641	Molecular determinants of state-dependent block of voltage-gated sodium channels by pilsicainide	Article	2010	Desaphy J.-F., Dipalma A., Costanza T., Bruno C., Lentini G., Franchini C., George A.L., Conte Camerino D.	British Journal of Pharmacology	160
21864321	Na v1.1 dysfunction in genetic epilepsy with febrile seizures-plus or Dravet syndrome	Article	2011	Volkers L., Kahlig K.M., Verbeek N.E., Das J.H.G., van Kempen M.J.A., Stroink H., Augustijn P., van Nieuwenhuizen O., Lindhout D., George A.L., Koeleman B.P.C., Rook M.B.	European Journal of Neuroscience	34
33189882	Nanoparticle encapsulated oxytocin increases resistance to induced seizures and restores social behavior in Scn1a-derived epilepsy	Article	2021	Wong J.C., Shapiro L., Thelin J.T., Heaton E.C., Zaman R.U., D'Souza M.J., Murnane K.S., Escayg A.	Neurobiology of Disease	147
12837571	Nav1.1 channels with mutations of severe myoclonic epilepsy in infancy display attenuated currents	Article	2003	Sugawara T., Tsurubuchi Y., Fujiwara T., Mazaki-Miyazaki E., Nagata K., Montal M., Inoue Y., Yamakawa K.	Epilepsy Research	54
33651714	Neddylation stabilizes Nav1.1 to maintain interneuron excitability and prevent seizures in murine epilepsy models	Article	2021	Chen W., Luo B., Gao N., Li H., Wang H., Li L., Cui W., Zhang L., Sun D., Liu F., Dong Z., Ren X., Zhang H., Su H., Xiong W.-C., Mei L.	Journal of Clinical Investigation	131
21156207	Neuronal voltage-gated ion channels are genetic modifiers of generalized epilepsy with febrile seizures plus	Article	2011	Hawkins N.A., Martin M.S., Frankel W.N., Kearney J.A., Escayg A.	Neurobiology of Disease	41
24101488	Nonfunctional NaV1.1 familial hemiplegic migraine mutant transformed into gain of function by partial rescue of folding defects	Article	2013	Cestèle S., Schiavon E., Rusconi R., Franceschetti S., Mantegazza M.	Proceedings of the National Academy of Sciences of the United States of America	110
17054685	Nonfunctional SCN1A is common in severe myoclonic epilepsy of infancy	Article	2006	Ohmori I., Kahlig K.M., Rhodes T.H., Wang D.W., George Jr. A.L.	Epilepsia	47
15263074	Noninactivating voltage-gated sodium channels in severe myoclonic epilepsy of infancy	Article	2004	Rhodes T.H., Lossin C., Vanoye C.G., Wang D.W., George Jr. A.L.	Proceedings of the National Academy of Sciences of the United States of America	101
23086956	Nontruncating SCN1A mutations associated with severe myoclonic epilepsy of infancy impair cell surface expression	Article	2012	Thompson C.H., Porter J.C., Kahlig K.M., Daniels M.A., George Jr. A.L.	Journal of Biological Chemistry	287
15797713	Novel clustering of sodium channel Na(v)1.1 with ankyrin-G and neurofascin at discrete sites in the inner plexiform layer of the retina	Article	2005	Mol Cell Neurosci	Mol Cell Neurosci	Mol Cell Neurosci	Van Wart A
31686106	Optimization of in silico tools for predicting genetic variants: Individualizing for genes with molecular sub-regional stratification	Article	2020	Tang B., Li B., Gao L.-D., He N., Liu X.-R., Long Y.-S., Zeng Y., Yi Y.-H., Su T., Liao W.-P.	Briefings in Bioinformatics	21
28607094	Pharmacology of the Nav1.1 domain IV voltage sensor reveals coupling between inactivation gating processes	Article	2017	Osteen J.D., Sampson K., Iyer V., Julius D., Bosmans F.	Proceedings of the National Academy of Sciences of the United States of America	114
34083748	Phenotypic analysis of catastrophic childhood epilepsy genes	Article	2021	Griffin A., Carpenter C., Liu J., Paterno R., Grone B., Hamling K., Moog M., Dinday M.T., Figueroa F., Anvar M., Ononuju C., Qu T., Baraban S.C.	Communications Biology	4
25312340	Postzygotic single-nucleotide mosaicisms in whole-genome sequences of clinically unremarkable individuals	Article	2014	Huang A.Y., Xu X., Ye A.Y., Wu Q., Yan L., Zhao B., Yang X., He Y., Wang S., Zhang Z., Gu B., Zhao H.-Q., Wang M., Gao H., Gao G., Zhang Z., Yang X., Wu X., Zhang Y., Wei L.	Cell Research	24
22926190	Preferential inactivation of SCN1A in parvalbumin interneurons increases seizure susceptibility	Article	2013	Dutton S.B., Makinson C.D., Papale L.A., Shankar A., Balakrishnan B., Nakazawa K., Escayg A.	Neurobiology of Disease	49
31041505	Prolonged post-differentiation culture influences the expression and biophysics of Na+ and Ca2+ channels in induced pluripotent stem cell-derived ventricular-like cardiomyocytes	Article	2019	Ross G.R., Rizvi F., Emelyanova L., Tajik A.J., Jahangir A.	Cell and Tissue Research	378
	Propranolol blocks cardiac and neuronal voltage-gated sodium channels	Article	2010	Wang D.W., Mistry A.M., Kahlig K.M., Kearney J.A., Xiang J., George A.L.	Frontiers in Pharmacology	DEC
22150645	Pure haploinsufficiency for Dravet syndrome Na V1.1 (SCN1A) sodium channel truncating mutations	Article	2012	Bechi G., Scalmani P., Schiavon E., Rusconi R., Franceschetti S., Mantegazza M.	Epilepsia	53
24417577	Purinergic control of hippocampal circuit hyperexcitability in Dravet syndrome	Article	2014	Gu F., Hazra A., Aulakh A., Žiburkus J.	Epilepsia	55
20735403	Ranolazine selectively blocks persistent current evoked by epilepsy-associated Na V1.1 mutations	Article	2010	Kahlig K.M., Lepist I., Leung K., Rajamani S., George A.L.	British Journal of Pharmacology	161
24747835	Reduced dendritic arborization and hyperexcitability of pyramidal neurons in a Scn1b-based model of Dravet syndrome	Article	2014	Reid C.A., Leaw B., Richards K.L., Richardson R., Wimmer V., Yu C., Hill-Yardin E.L., Lerche H., Scheffer I.E., Berkovic S.F., Petrou S.	Brain	137
19228957	Regulation of persistent na current by interactions between β subunits of voltage-gated na channels	Article	2009	Aman T.K., Grieco-Calub T.M., Chen C., Rusconi R., Slat E.A., Isom L.L., Raman I.M.	Journal of Neuroscience	29
30529264	RNA-seq Analysis of the SCN1A-KO Model based on CRISPR/Cas9 Genome Editing Technology	Article	2019	Shi X., He W., Guo S., Zhang B., Ren S., Liu K., Sun T., Cui J.	Neuroscience	398
23570977	Role of late sodium current as a potential arrhythmogenic mechanism in the progression of pressure-induced heart disease	Article	2013	Toischer K., Hartmann N., Wagner S., Fischer T.H., Herting J., Danner B.C., Sag C.M., Hund T.J., Mohler P.J., Belardinelli L., Hasenfuss G., Maier L.S., Sossalla S.	Journal of Molecular and Cellular Cardiology	61
26694226	Scn1a dysfunction alters behavior but not the effect of stress on seizure response	Article	2016	Sawyer N.T., Helvig A.W., Makinson C.D., Decker M.J., Neigh G.N., Escayg A.	Genes, Brain and Behavior	15
21453355	SCN1A splice variants exhibit divergent sensitivity to commonly used antiepileptic drugs	Article	2011	Thompson C.H., Kahlig K.M., George Jr. A.L.	Epilepsia	52
34475263	Seizure phenotype and underlying cellular defects in drosophila knock-in models of DS (R1648C) and GEFS1 (R1648H) SCN1A epilepsy	Article	2021	Roemmich A.J., Vu T., Lukacsovich T., Hawkins C., Schutte S.S., O’Dowd D.K.	eNeuro	8
27281198	Selective spider toxins reveal a role for the Nav1.1 channel in mechanical pain	Article	2016	Osteen J.D., Herzig V., Gilchrist J., Emrick J.J., Zhang C., Wang X., Castro J., Garcia-Caraballo S., Grundy L., Rychkov G.Y., Weyer A.D., Dekan Z., Undheim E.A.B., Alewood P., Stucky C.L., Brierley S.M., Basbaum A.I., Bosmans F., King G.F., Julius D.	Nature	534
18632931	Self-limited hyperexcitability: Functional effect of a familial hemiplegic migraine mutation of the Nav1.1 (SCN1A) Na+ channel	Article	2008	Cestèle S., Scalmani P., Rusconi R., Terragni B., Franceschetti S., Mantegazza M.	Journal of Neuroscience	28
16380441	Single-channel properties of human NaV1.1 and mechanism of channel dysfunction in SCN1A-associated epilepsy	Article	2006	Vanoye C.G., Lossin C., Rhodes T.H., George Jr. A.L.	Journal of General Physiology	127
30705357	Small changes in synaptic gain lead to seizure-like activity in neuronal network at criticality	Article	2019	Du J., Vegh V., Reutens D.C.	Scientific Reports	9
16210358	Sodium channel dysfunction in intractable childhood epilepsy with generalized tonic-clonic seizures	Article	2005	Rhodes T.H., Vanoye C.G., Ohmori I., Ogiwara I., Yamakawa K., George Jr. A.L.	Journal of Physiology	569
29188487	Sodium Metabisulfite: Effects on Ionic Currents and Excitotoxicity	Article	2018	Lai M.-C., Hung T.-Y., Lin K.-M., Sung P.-S., Wu S.-J., Yang C.-S., Wu Y.-J., Tsai J.-J., Wu S.-N., Huang C.-W.	Neurotoxicity Research	34
20080581	Multiplexed transposon-mediated stable gene transfer in human cells	Article	2010	Kahlig K.M., Saridey S.K., Kaja A., Daniels M.A., George Jr. A.L., Wilson M.H.	Proceedings of the National Academy of Sciences of the United States of America	107
	Mutations of Voltage-Gated Sodium Channel Genes SCN1A and SCN2A in Epilepsy, Intellectual Disability, and Autism	Book Chapter	2016	Yamakawa K.	Neuronal and Synaptic Dysfunction in Autism Spectrum Disorder and Intellectual Disability
32114117	The voltage-gated sodium channel inhibitor, 4,9-anhydrotetrodotoxin, blocks human Nav1.1 in addition to Nav1.6	Article	2020	Denomme N., Lukowski A.L., Hull J.M., Jameson M.B., Bouza A.A., Narayan A.R.H., Isom L.L.	Neuroscience Letters	724
32146541	Tiered analysis of whole-exome sequencing for epilepsy diagnosis	Article	2020	Dunn P.J., Maher B.H., Albury C.L., Stuart S., Sutherland H.G., Maksemous N., Benton M.C., Smith R.A., Haupt L.M., Griffiths L.R.	Molecular Genetics and Genomics	295
28735770	To4, the first Tityus obscurus β-toxin fully electrophysiologically characterized on human sodium channel isoforms	Article	2017	Duque H.M., Mourão C.B.F., Tibery D.V., Barbosa E.A., Campos L.A., Schwartz E.F.	Peptides	95
23885228	Towards identification of individual etiologies by resolving genomic and biological conundrums in patients with autism spectrum disorders	Article	2013	Mol Syndromol	Mol Syndromol	Mol Syndromol	Poot M
31445158	Transcriptomes of Dravet syndrome iPSC derived GABAergic cells reveal dysregulated pathways for chromatin remodeling and neurodevelopment	Article	2019	Schuster J., Laan L., Klar J., Jin Z., Huss M., Korol S., Noraddin F.H., Sobol M., Birnir B., Dahl N.	Neurobiology of Disease	132
28490751	Unexpected Efficacy of a Novel Sodium Channel Modulator in Dravet Syndrome	Article	2017	Anderson L.L., Hawkins N.A., Thompson C.H., Kearney J.A., George A.L., Jr.	Scientific Reports	7
27333023	Upregulation of Haploinsufficient Gene Expression in the Brain by Targeting a Long Non-coding RNA Improves Seizure Phenotype in a Model of Dravet Syndrome	Article	2016	Hsiao J., Yuan T.Y., Tsai M.S., Lu C.Y., Lin Y.C., Lee M.L., Lin S.W., Chang F.C., Liu Pimentel H., Olive C., Coito C., Shen G., Young M., Thorne T., Lawrence M., Magistri M., Faghihi M.A., Khorkova O., Wahlestedt C.	EBioMedicine	9
	Venom Peptides with Dual Modulatory Activity on the Voltage-Gated Sodium Channel NaV1.1 Provide Novel Leads for Development of Antiepileptic Drugs	Article	2020	Chow C.Y., Chin Y.K.-Y., Walker A.A., Guo S., Blomster L.V., Ward M.J., Herzig V., Rokyta D.R., King G.F.	ACS Pharmacology and Translational Science	3
18021327	Voltage-dependent Nav1.7 sodium channels: Multiple roles in adrenal chromaffin cells and peripheral nervous system	Conference Paper	2008	Wada A., Wanke E., Gullo F., Schiavon E.	Acta Physiologica	192
	Voltage-gated sodium channels: Biophysics, pharmacology, and related channelopathies	Article	2012	Savio-Galimberti E., Gollob M.H., Darbar D.	Frontiers in Pharmacology	2021-07-03
27458797	A deleterious Nav1.1 mutation selectively impairs telencephalic inhibitory neurons derived from Dravet Syndrome patients	Article	2016	Sun Y., Paşca S.P., Portmann T., Goold C., Worringer K.A., Guan W., Chan K.C., Gai H., Vogt D., Chen Y.-J.J., Mao R., Chan K., Rubenstein J.L.R., Madison D.V., Hallmayer J., Froehlich-Santino W.M., Bernstein J.A., Dolmetsch R.E.	eLife	5
17576410	BACE1 regulates voltage-gated sodium channels and neuronal activity	Article	2007	Nat Cell Biol	Nat Cell Biol	Nat Cell Biol	Kim DY
34135733	Deciphering in silico the Role of Mutated Na (V) 1.1 Sodium Channels in Enhancing Trigeminal Nociception in Familial Hemiplegic Migraine Type 3	Article	2021	Front Cell Neurosci	Front Cell Neurosci	Front Cell Neurosci	Suleimanova A
34491914	Initiation of migraine-related cortical spreading depolarization by hyperactivity of GABAergic neurons and NaV1.1 channels	Article	2021	J Clin Invest	J Clin Invest	J Clin Invest	Chever O
16750188	Molecular diversity of voltage-gated sodium channel alpha and beta subunit mRNAs in human tissues	Article	2006	Eur J Pharmacol	Eur J Pharmacol	Eur J Pharmacol	Candenas L
18621678	Divergent sodium channel defects in familial hemiplegic migraine（细胞）	Article（排除）	2008	Kahlig K.M., Rhodes T.H., Pusch M., Freilinger T., Pereira-Monteiro J.M., Ferrari M.D., Van Den Maagdenberg A.M.J.M., Dichgans M., George Jr. A.L.	Proceedings of the National Academy of Sciences of the United States of America	105
29986598	Gain of function of sporadic/familial hemiplegic migraine-causing SCN1A mutations: Use of an optimized cDNA（细胞）	Article（排除）	2019	Bertelli S., Barbieri R., Pusch M., Gavazzo P.	Cephalalgia	39
31730442	Late sodium current blocker GS967 inhibits persistent currents induced by familial hemiplegic migraine type 3 mutations of the SCN1A gene（细胞）	Article（排除）	2019	Barbieri R., Bertelli S., Pusch M., Gavazzo P.	Journal of Headache and Pain	20
30038559	Gain of Function for the SCN1A/hNa(v)1.1-L1670W Mutation Responsible for Familial Hemiplegic Migraine（细胞）	Article	2018	Front Mol Neurosci	Front Mol Neurosci	Front Mol Neurosci	Dhifallah S

## Sheet:  Review (357)
17395140	Channelopathies in Idiopathic Epilepsy	Review	Neurotherapeutics	4	4	4
31371349	Genomic testing in pediatric epilepsy	Review	Cold Spring Harbor Molecular Case Studies	5	5	5
18759544	Migraine genetics	Review	Expert Review of Neurotherapeutics	8	8	8
31865891	Systematic Review of the Genetics of Sudden Unexpected Death in Epilepsy: Potential Overlap With Sudden Cardiac Death and Arrhythmia-Related Genes	Review	Journal of the American Heart Association	9	9	9
24752120	Mechanisms of sudden unexpected death in epilepsy: The pathway to prevention	Review	Nature Reviews Neurology	10	10	10
18637738	Forty years from markers to genes	Article	Twin Research and Human Genetics	11	11	11
22462743	Research Highlights: Genetic polymorphisms and retention rate of antiepileptic drugs	Comment	Pharmacogenomics	13	13	13
24740805	Epilepsy: Old syndromes, new genes	Review	Current Neurology and Neuroscience Reports	14	14	14
30448857	From molecules to medicines: the dawn of targeted therapies for genetic epilepsies	Review	Nature Reviews Neurology	14	14	14
24524648	The relationship between genes affecting the development of epilepsy and approaches to epilepsy therapy	Review	Expert Review of Neurotherapeutics	14	14	14
26319171	Genetic Discoveries Drive Molecular Analyses and Targeted Therapeutic Options in the Epilepsies	Review	Current Neurology and Neuroscience Reports	15	15	15
26597089	The genetic landscape of the epileptic encephalopathies of infancy and childhood	Review	The Lancet Neurology	15	15	15
26319172	Using Patient-Derived Induced Pluripotent Stem Cells to Model and Treat Epilepsies	Review	Current Neurology and Neuroscience Reports	15	15	15
32001838	Antisense oligonucleotide hope for childhood epilepsies	Review	Nature Reviews Neurology	16	16	16
28474565	Drug-resistant epilepsy and surgery	Review	Current Neuropharmacology	16	16	16
32616899	Gene tests in adults with epilepsy and intellectual disability	Article	Nature Reviews Neurology	16	16	16
28405954	Genetic Testing in Pediatric Epilepsy	Review	Current Neurology and Neuroscience Reports	17	17	17
30370865	Understanding genotypes and phenotypes of the mutations in voltage-gated sodium channel α subunits in epilepsy	Review	CNS and Neurological Disorders - Drug Targets	18	18	18
22617547	A genetic diagnostic approach to infantile epileptic encephalopathies	Review	Journal of Clinical Neuroscience	19	19	19
17495624	Migraine: Gene mutations and functional consequences	Review	Current Opinion in Neurology	20	20	20
31588875	Pharmacogenetics and the treatment of epilepsy: What do we know?	Review	Pharmacogenomics	20	20	20
29895856	Evaluating the pathogenic potential of genes with de novo variants in epileptic encephalopathies	Review	Genetics in Medicine	21	21	21
21917483	The genetics of monogenic idiopathic epilepsies and epileptic encephalopathies	Review	Seizure	21	21	21
22569204	PharmGKB summary: Phenytoin pathway	Review	Pharmacogenetics and Genomics	22	22	22
29467100	Epileptogenesis in neonatal brain	Review	Seminars in Fetal and Neonatal Medicine	23	23	23
28799511	Treatment of epileptic encephalopathies	Review	Current Pharmaceutical Design	23	23	23
29249505	Early Life Epilepsies are a Comorbidity of Developmental Brain Disorders	Review	Seminars in Pediatric Neurology	24	24	24
30087451	Somatic mutations in the human brain: implications for psychiatric research	Review	Molecular Psychiatry	24	24	24
12915053	The genetics of human epilepsy	Review	Trends in Pharmacological Sciences	24	24	24
14505365	Paroxysms of excitement: Sodium channel dysfunction in heart and brain	Review	BioEssays	25	25	25
21076337	Stress and epilepsy: Multiple models, multiple outcomes	Review	Journal of Clinical Neurophysiology	27	27	27
18206787	Channelopathies: A Review	Review	Pediatric Neurology	38	38	38
17101538	Voltage-gated sodium channels: Action players with many faces	Review	Annals of Medicine	38	38	38
33940579	CRISPR/dCas9 as a Therapeutic Approach for Neurodevelopmental Disorders: Innovations and Limitations Compared to Traditional Strategies	Review	Developmental Neuroscience	43	43	43
17578530	The cerebellum and migraine	Review	Headache	47	47	47
18754913	Genetic mechanisms in idiopathic epilepsies	Review	Developmental Medicine and Child Neurology	50	50	50
15912753	Development of the molecular genetics of epilepsy	Review	Brain and Nerve	57	57	57
33856647	Epilepsy and Migraine Shared Genetic and Molecular Mechanisms: Focus on Therapeutic Strategies	Review	Molecular Neurobiology	58	58	58
17187176	The search for migraine genes: An overview of current knowledge	Review	Cellular and Molecular Life Sciences	64	64	64
31380988	Tackling Epilepsy with High-definition Precision Medicine: A Review	Review	JAMA Neurology	76	76	76
28986278	Synaptopathology in autism spectrum disorders: Complex effects of synaptic genes on neural circuits	Review	Progress in Neuro-Psychopharmacology and Biological Psychiatry	84	84	84
25996134	The Stroke-Migraine Depolarization Continuum	Review	Neuron	86	86	86
18952142	Mechanisms of human inherited epilepsies	Review	Progress in Neurobiology	87	87	87
26985722	Unifying Views of Autism Spectrum Disorders: A Consideration of Autoregulatory Feedback Loops	Review	Neuron	89	89	89
30269941	Individualized treatment approaches: Fenfluramine, a novel antiepileptic medication for the treatment of seizures in Dravet syndrome	Review	Epilepsy and Behavior	91	91	91
30392545	Migraine Headache: Updates and Future Developments	Review	Mayo Clinic Proceedings	93	93	93
26231830	Prioritizing the development of mouse models for childhood brain disorders	Review	Neuropharmacology	100	100	100
31708430	Novel treatment approaches and pediatric research networks in status epilepticus	Review	Epilepsy and Behavior	101	101	101
32544542	Seizing the moment: Zebrafish epilepsy models	Review	Neuroscience and Biobehavioral Reviews	116	116	116
18060017	Mutations in sodium-channel gene SCN9A cause a spectrum of human genetic pain disorders	Review	Journal of Clinical Investigation	117	117	117
29037745	Genetics update: Monogenetics, polygene disorders and the quest for modifying genes	Review	Neuropharmacology	132	132	132
22961543	Neurological perspectives on voltage-gated sodium channels	Review	Brain	135	135	135
28764992	Impact on GABA systems in monogenetic developmental CNS disorders: Clues to symptomatic treatment	Review	Neuropharmacology	136	136	136
29783181	Autistic traits in epilepsy models: Why, when and how?	Review	Epilepsy Research	144	144	144
32880951	Recent advances in gene therapy for neurodevelopmental disorders with epilepsy	Review	Journal of Neurochemistry	157	157	157
18405771	Familial and sporadic hemiplegic migraine [Migraine hémiplégique familiale et sporadique]	Review	Revue Neurologique	164	164	164
24419271	Neurobiology of autism gene products: Towards pathogenesis and drug targets	Review	Psychopharmacology	231	231	231
32473276	Ion Channels Involvement in Neurodevelopmental Disorders	Review	Neuroscience	440	440	440
32554108	Losing the Beat: Contribution of Purkinje Cell Firing Dysfunction to Disease, and Its Reversal	Review	Neuroscience	462	462	462
25012387	How can advances in epilepsy genetics lead to better treatments and cures?	Review	Advances in Experimental Medicine and Biology	813	813	813
21563120	Early diagnosis of Dravet's syndrome: Contributions from clinical practice and molecular biology [Diagnóstico temprano del síndrome de Dravet: Aportaciones de la clínica y la biología molecular]	Review	2011	Abad R.S.-C.	Revista de Neurologia	52
15508261	"Severe myoclonic epilepsy in infancy". Relevance for the clinician of severe epilepsy starting in infancy	Review	2004	Acta Neurol Belg	Acta Neurol Belg	Acta Neurol Belg	Ceulemans B
	Voltage Gated Sodium Channel Genes in Epilepsy: Mutations, Functional Studies, and Treatment Dimensions	Review	2021	Ademuwagun I.A., Rotimi S.O., Syrbe S., Ajamma Y.U., Adebiyi E.	Frontiers in Neurology	12
15508917	Myoclonic seizures in the context of generalized epilepsy with febrile seizures plus (GEFS+)	Review	2005	Adv Neurol	Adv Neurol	Adv Neurol	Baulac M
	Slower, Fewer Hippocampal Ripples in Loss-of-Function Model of Dravet Syndrome	Comment	2020	Ahmed O.J.	Epilepsy Currents	20
23093055	Dravet syndrome: A genetic epileptic disorder	Review	2012	Akiyama M., Kobayashi K., Ohtsuka Y.	Acta Medica Okayama	66
	Dravet syndrome, what is new?	Review	2013	Al-Baradie R.S.	Neurosciences	18
28615892	Molecular Genetics of Epilepsy: A Clinician's Perspective	Review	2017	Ann Indian Acad Neurol	Ann Indian Acad Neurol	Ann Indian Acad Neurol	Dhiman V
27127758	Migraine in the era of precision medicine	Review	2016	Ann Transl Med	Ann Transl Med	Ann Transl Med	Zhang LM
25087078	Genetic determinants of common epilepsies: A meta-analysis of genome-wide association studies	Meta-Analysis	2014	Anney R.J.L., Avbersek A., Balding D., Baum L., Becker F., Berkovic S.F., Bradfi J.P., Brody L.C., Buono R.J., Catarino C.B., Cavalleri G.L., Cherny S.S., Chinthapalli K., Coffey A.J., Compston A., Cossette P., De Haan G.-J., De Jonghe P., De Kovel C.G.F., Delanty N., Depondt C., Dlugos D.J., Doherty C.P., Elger C.E., Ferraro T.N., Feucht M., Franke A., French J., Gaus V., Goldstein D.B., Gui H.,…	The Lancet Neurology	13
19702726	Dravet syndrome: From electroclinical characteristics to molecular biology	Review	2009	Arzimanoglou A.	Epilepsia	50
16550559	Genes and loci involved in febrile seizures and related epilepsy syndromes	Review	2006	Audenaert D., Van Broeckhoven C., De Jonghe P.	Human Mutation	27
33971653	Targeting Poison Exons to Treat Developmental and Epileptic Encephalopathy	Review	2021	Aziz M.C., Schneider P.N., Carvill G.L.	Developmental Neuroscience	43
	Genetic basis of sudden unexpected death in epilepsy	Review	2017	Bagnall R.D., Crompton D.E., Semsarian C.	Frontiers in Neurology	8
29582177	Association between two SCN1A polymorphisms and resistance to sodium channel blocking AEDs: a meta-analysis	Meta-Analysis	2018	Bao Y., Liu X., Xiao Z.	Neurological Sciences	39
23801004	Headache and epilepsy topical collection on secondary headache	Review	2013	Bauer P.R., Carpay J.A., Terwindt G.M., Sander J.W., Thijs R.J., Haan J., Visser G.H.	Current Pain and Headache Reports	17
	Channelopathies in human epilepsies [Canalopathies épileptiques]	Review	2010	Baulac S.	Epilepsies	22
19853223	Advances on the Genetics of Mendelian Idiopathic Epilepsies	Review	2009	Baulac S., Baulac M.	Neurologic Clinics	27
24337656	Case-control association study of polymorphisms in the voltage-gated sodium channel genes SCN1A, SCN2A, SCN3A, SCN1B, and SCN2B and epilepsy	Meta-Analysis	2014	Baum L., Haerian B.S., Ng H.-K., Wong V.C.N., Ng P.W., Lui C.H.T., Sin N.C., Zhang C., Tomlinson B., Wong G.W.-K., Tan H.J., Raymond A.A., Mohamed Z., Kwan P.	Human Genetics	133
	Beyond Dravet Syndrome: Characterization of a Novel, More Severe SCN1A-Linked Epileptic Encephalopathy	Review	2019	Beck V.C., Hull J.M., Isom L.L.	Epilepsy Currents	19
22341965	SCN1A mutations in Dravet syndrome: Impact of interneuron dysfunction on neural networks and cognitive outcome	Review	2012	Bender A.C., Morse R.P., Scott R.C., Holmes G.L., Lenck-Santini P.-P.	Epilepsy and Behavior	23
	Genetics of epilepsy in clinical practice	Review	2015	Berkovic S.F.	Epilepsy Currents	15
20495966	Migraine and epilepsy: A focus on overlapping clinical, pathophysiological, molecular, and therapeutic aspects	Review	2010	Bianchin M.M., Londero R.G., Lima J.E., Bigal M.E.	Current Pain and Headache Reports	14
14738422	Generalized Epilepsy with Febrile Seizures Plus (GEFS+): Clinical Spectrum in Seven Italian Families Unrelated to SCN1A, SCN1B, and GABRG2 Gene Mutations	Review	2004	Bonanni P., Malcarne M., Moro F., Veggiotti P., Buti D., Ferrari A.R., Parrini E., Mei D., Volzone A., Zara F., Heron S.E., Bordo L., Marini C., Guerrini R.	Epilepsia	45
	Genetic Basis of Ventricular Arrhythmias	Review	2010	Boussy T., Paparella G., de Asmundis C., Sarkozy A., Chierchia G.B., Brugada J., Brugada R., Brugada P.	Heart Failure Clinics	6
18342948	How do mutant Nav1.1 sodium channels cause epilepsy?	Review	2008	Brain Res Rev	Brain Res Rev	Brain Res Rev	Ragsdale DS
18093548	Epilepsy: randomised trials and genetic tribulations	Review	2008	Brodie M.J.	The Lancet Neurology	7
	Exploring the hereditary nature of migraine	Review	2021	Bron C., Sutherland H.G., Griffiths L.R.	Neuropsychiatric Disease and Treatment	17
32227486	Sodium channel epilepsies and neurodevelopmental disorders: from disease mechanisms to clinical application	Review	2020	Brunklaus A., Lal D.	Developmental Medicine and Child Neurology	62
31782251	SCN1A variants from bench to bedside—improved clinical prediction from functional characterization	Review	2020	Brunklaus A., Schorge S., Smith A.D., Ghanty I., Stewart K., Gardiner S., Du J., Pérez-Palma E., Symonds J.D., Collier A.C., Lal D., Zuberi S.M.	Human Mutation	41
24836964	Dravet syndrome - From epileptic encephalopathy to channelopathy	Review	2014	Brunklaus A., Zuberi S.M.	Epilepsia	55
25917466	Febrile seizures and Genetic Epilepsy with Febrile Seizures plus (GEFS+)	Review	2015	Camfield P., Camfield C.	Epileptic Disorders	17
33855971	Epilepsy channelopathies go neddy: Stabilizing NaV1.1 channels by neddylation	Review	2021	Cannon S.C.	Journal of Clinical Investigation	131
12086630	Sodium channel gating: No margin for error	Review	2002	Cannon S.C.	Neuron	34
	The voltage-gated channelopathies as a paradigm for studying epilepsy-causing genes	Review	2018	Carpenter J.C., Schorge S.	Current Opinion in Physiology	2
32615329	Poison exons in neurodevelopment and disease	Review	2020	Carvill G.L., Mefford H.C.	Current Opinion in Genetics and Development	65
	Dravet syndrome: a sodium channel interneuronopathy	Review	2018	Catterall W.A.	Current Opinion in Physiology	2
20194124	NaV1.1 channels and epilepsy	Review	2010	Catterall W.A., Kalume F., Oakley J.C.	Journal of Physiology	588
18197881	A review of the genetic relation between migraine and epilepsy	2008	2008	Cephalalgia	Cephalalgia	Cephalalgia	Haan J
23398611	Divergent effects of the T1174S SCN1A mutation associated with seizures and hemiplegic migraine	Review	2013	Cestèle S., Labate A., Rusconi R., Tarantino P., Mumoli L., Franceschetti S., Annesi G., Mantegazza M., Gambardella A.	Epilepsia	54
	"Severe myoclonic epilepsy in infancy" relevance for the clinician of severe epilepsy starting in infancy	Review	2004	Ceulemans B., Cras P.	Acta Neurologica Belgica	104
26293783	Seizing control of epileptic activity can improve outcome	Review	2015	Chapman K.E., Specchio N., Shinnar S., Holmes G.L.	Epilepsia	56
	Current proceedings of febrile seizures and related epileptic syndromes in SCN1A: From bedside to bench	Review	2009	Chen S.-J., Hirose S.	Journal of Medical Sciences	29
	Genetic and epigenetic mechanisms of epilepsy: A review	Review	2017	Chen T., Giri M., Xia Z., Subedi Y.N., Li Y.	Neuropsychiatric Disease and Treatment	13
	Untangling the dravet syndrome seizure network: The changing face of a rare genetic epilepsy	Review	2014	Chopra R., Isom L.L.	Epilepsy Currents	14
17438605	Gene symbol: SCN1A.	Article	2007	Combi R., Grioni D., Tenchini M.L., Bertolini M., Tredici G., Dalpra L.	Human genetics	120
27264139	Dravet Syndrome: Diagnosis and Long-Term Course	Review	2016	Connolly M.B.	Canadian Journal of Neurological Sciences	43
	Understanding spreading depression from headache to sudden unexpected death	Review	2018	Cozzolino O., Marchese M., Trovato F., Pracucci E., Ratto G.M., Buzzi M.G., Sicca F., Santorelli F.M.	Frontiers in Neurology	9
31497436	Dravet Syndrome: An Overview	Review	2019	Cureus	Cureus	Cureus	Anwar A
20425031	Cortical spreading depression and migraine	Review	2010	Curr Neurol Neurosci Rep	Curr Neurol Neurosci Rep	Curr Neurol Neurosci Rep	Eikermann-Haerter K
19532038	Genetics of antiepileptic drug resistance	Review	2009	Curr Opin Neurol	Curr Opin Neurol	Curr Opin Neurol	Sisodiya SM
30123852	Dravet Syndrome: A Sodium Channel Interneuronopathy	Review	2018	Curr Opin Physiol	Curr Opin Physiol	Curr Opin Physiol	Catterall WA
18765143	Genetics of headache in children: where are we headed?	Review	2008	Curr Pain Headache Rep	Curr Pain Headache Rep	Curr Pain Headache Rep	Hershey AD
30315507	Current Treatment Strategies and Future Treatment Options for Dravet Syndrome	Review	2018	Curr Treat Options Neurol	Curr Treat Options Neurol	Curr Treat Options Neurol	Ziobro J
23203776	Familial and sporadic hemiplegic migraine: diagnosis and treatment	Review	2013	Curr Treat Options Neurol	Curr Treat Options Neurol	Curr Treat Options Neurol	Pelzer N
21504425	Molecular genetics of Dravet syndrome	Review	2011	De Jonghe P.	Developmental Medicine and Child Neurology	53
	Hemiplegic and basilar-type migraine: Epidemiology, genetics, and mechanisms	Review	2006	de Theije-Kors E., Haan J.	Headache Currents	3
19455354	Molecular genetics of migraine	Review	2009	de Vries B., Frants R.R., Ferrari M.D., van den Maagdenberg A.M.J.M.	Human Genetics	126
16866710	Genetic biomarkers for migraine	Review	2006	De Vries B., Haan J., Frants R.R., Van Den Maagdenberg A.M.J.M., Ferrari M.D.	Headache	46
19087113	Debate: Does genetic information in humans help us treat patients? PRO - Genetic information in humans helps us treat patients. CON - Genetic information does not help at all	Review	2008	Delgado-Escueta A.V., Bourgeois B.F.D.	Epilepsia	49
11579434	Genes and mutations in idiopathic epilepsy	Article	2001	Delgado-Escueta A.V., Ganesh S., Yamakawa K.	American Journal of Medical Genetics - Seminars in Medical Genetics	106
	Molecular genetics of epilepsy: A clinician's perspective	Review	2017	Dhiman V.	Annals of Indian Academy of Neurology	20
32430436	Diagnostic and therapeutic aspects of hemiplegic migraine	Review	2020	Di Stefano V., Rispoli M.G., Pellegrino N., Graziosi A., Rotondo E., Napoli C., Pietrobon D., Pietrobon D., Brighina F., Parisi P.	Journal of Neurology, Neurosurgery and Psychiatry	91
32949224	Sudden death in epilepsy: There is room for intracranial pressure	Review	2020	Dibué M., Spoor J.K.H., Dremmen M., von Saß C.F., Hänggi D., Steiger H.-J., Ryvlin P., Kamp M.A.	Brain and Behavior	10
28666193	Efficacy of adjunctive vagus nerve stimulation in patients with Dravet syndrome: A meta-analysis of 68 patients	Review	2017	Dibué-Adjei M., Fischer I., Steiger H.-J., Kamp M.A.	Seizure	50
	Defining the role of anti-epileptic pharmacogenetics in psychiatric drug therapy	Review	2008	Dlugos D.J., Buono R.J., Ferraro T.N.	Psychiatric Annals	38
	Acute encephalopathy in Dravet syndrome: Case reports and literature review	Review	2016	Do T.T.H., Huynh T.T.K., Van Le T.K.	Neurology Asia	21
21504424	Dravet syndrome history	Review	2011	Dravet C.	Developmental Medicine and Child Neurology	53
21463272	The core Dravet syndrome phenotype	Review	2011	Dravet C.	Epilepsia	52
	Comorbid Bipolar Disorder and Migraine: From Mechanisms to Treatment	Review	2021	Duan J., Yang R., Lu W., Zhao L., Hu S., Hu C.	Frontiers in Psychiatry	11
16302874	Seizures of idiopathic generalized epilepsies	Review	2005	Durón R.M., Medina M.T., Martínez-Juárez I.E., Bailey J.N., Perez-Gosiengfiao K.T., Ramos-Ramírez R., López-Ruiz M., Alonso M.E., Ortega R.H.C., Pascual-Castroviejo I., Machado-Salas J., Mija L., Delgado-Escueta A.V.	Epilepsia	46
25204757	Epilepsy and mental retardation restricted to females: X-linked epileptic infantile encephalopathy of unusual inheritance	Review	2015	Duszyc K., Terczynska I., Hoffman-Zacharska D.	Journal of Applied Genetics	56
21463283	Dravet syndrome: insights from in vitro experimental models	Review	2011	Epilepsia	Epilepsia	Epilepsia	Mantegazza M
20331710	Genetics of the epilepsies: genetic twists in the channels and other tales	Review	2010	Epilepsia	Epilepsia	Epilepsia	Scheffer IE
34053869	Genetics and gene therapy in Dravet syndrome	Review	2021	Epilepsy Behav	Epilepsy Behav	Epilepsy Behav	Higurashi N
20831750	Sodium channel SCN1A and epilepsy: Mutations and mechanisms	Review	2010	Escayg A., Goldin A.L.	Epilepsia	51
28565819	Genetic basis of pediatric epilepsy syndromes	Review	2017	Exp Ther Med	Exp Ther Med	Exp Ther Med	Zhang D
22111617	Na+ channelopathies and epilepsy: recent advances and new perspectives	Review	2010	Expert Rev Clin Pharmacol	Expert Rev Clin Pharmacol	Expert Rev Clin Pharmacol	Marini C
	Clinical and pathophysiological relations between migraine and mood disorders	Review	2009	Fasmer O.B., Akiskal H.S., Kelsoe J.R., Oedegaard K.J.	Current Psychiatry Reviews	5
22594501	Discovery of epilepsy susceptibility genes: Implications for therapy development and pharmacogenomics	Review	2012	Ferraro T.N.	Pharmacogenomics	13
17181426	Role of genetics in the diagnosis and treatment of epilepsy	Review	2006	Ferraro T.N., Dlugos D.J., Buono R.J.	Expert Review of Neurotherapeutics	6
	Animal models of migraine [Animální modely migrény]	Review	2009	Franěk M.	Bolest	12
16915377	Genetics of migraine [Genetik der migräne]	Review	2006	Freilinger T., Dichgans M.	Nervenarzt	77
	Genetics of migraine: An update	Review	2012	Freilinger T.M.	Future Neurology	7
	ATP1A2 mutations in migraine: Seeing through the facets of an ion pump onto the neurobiology of disease	Review	2016	Friedrich T., Tavraz N.N., Junghans C.	Frontiers in Physiology	7
17981785	Genetic etiology of new forms of familial epilepsy	Review	2008	Front Biosci	Front Biosci	Front Biosci	Wang X
33519675	Association Between SCN1A rs2298771, SCN1A rs10188577, SCN2A rs17183814, and SCN2A rs2304016 Polymorphisms and Responsiveness to Antiepileptic Drugs: A Meta-Analysis	Meta-Analysis	2021	Front Neurol	Front Neurol	Front Neurol	Li M
33391151	SCN1A IVS5N+5 G>A Polymorphism and Risk of Febrile Seizure and Epilepsy: A Systematic Review and Meta-Analysis	Review	2020	Front Neurol	Front Neurol	Front Neurol	Hao J
33841294	Voltage Gated Sodium Channel Genes in Epilepsy: Mutations, Functional Studies, and Treatment Dimensions	Review	2021	Front Neurol	Front Neurol	Front Neurol	AdemuwaD1:D263gun IA
31001185	Multimodal Analysis of SCN1A Missense Variants Improves Interpretation of Clinically Relevant Variants in Dravet Syndrome	Meta-Analysis	2019	Front Neurol	Front Neurol	Front Neurol	Gonsales MC
29915537	Preclinical Animal Models for Dravet Syndrome: Seizure Phenotypes, Comorbidities and Drug Screening	Review	2018	Front Pharmacol	Front Pharmacol	Front Pharmacol	Griffin A
27445835	ATP1A2 Mutations in Migraine: Seeing through the Facets of an Ion Pump onto the Neurobiology of Disease	Review	2016	Front Physiol	Front Physiol	Front Physiol	Friedrich T
16806826	Clinical spectrum of mutations in SCN1A gene: Severe myoclonic epilepsy in infancy and related epilepsies	Review	2006	Fujiwara T.	Epilepsy Research	70
19469841	Clinical spectrum of SCN1A mutations	Review	2009	Gambardella A., Marini C.	Epilepsia	50
25710692	Neuronal communication and synaptic metabolism in childhood epilepsy [Comunicación neuronal y metabolismo sináptico en epilepsia infantil]	Review	2015	García-Cazorla À., Cortès-Saladelafont E., Duarte S.	Revista de Neurologia	60
16302872	Genetics of idiopathic generalized epilepsies	Review	2005	Gardiner M.	Epilepsia	46
17049761	Molecular genetics of infantile nervous system channelopathies	Review	2006	Gardiner M.	Early Human Development	82
19154521	Genetic calcium signaling abnormalities in the central nervous system: Seizures, migraine, and autism	Review	2009	Gargus J.J.	Annals of the New York Academy of Sciences	1151
	Monogenic migraine syndromes highlight novel drug targets	Review	2007	Gargus J.J., Shih C.H.	Drug Development Research	68
	The biology of the glutamatergic system and potential role in migraine	Review	2013	Gasparini C.F., Griffiths L.R.	International Journal of Biomedical Science	9
27817982	From genotype to phenotype in Dravet disease	Review	2017	Gataullina S., Dulac O.	Seizure	44
	Hemiplegic Migraine in Glut1 Deficiency Syndrome and Paroxysmal Dyskinesia at Ketogenic Diet Induction: Case Report and Literature Review	Review	2020	Gburek-Augustat J., Heinze A., Abou Jamra R., Merkenschlager A.	Movement Disorders Clinical Practice	7
20301562	Familial Hemiplegic Migraine	Review	1993	GeneReviews(?)	GeneReviews(?)	GeneReviews(?)	Jen JC
20301494	SCN1A Seizure Disorders	Review	1993	GeneReviews(?)	GeneReviews(?)	GeneReviews(?)	Miller IO
27905812	STXBP1 Encephalopathy with Epilepsy	Review	1993	GeneReviews(?)	GeneReviews(?)	GeneReviews(?)	Khaikin Y
30431232	The Role of Protocadherin 19 (PCDH19) in Neurodevelopment and in the Pathophysiology of Early Infantile Epileptic Encephalopathy-9 (EIEE9)	Review	2019	Gerosa L., Francolini M., Bassani S., Passafaro M.	Developmental Neurobiology	79
17141570	Recent advances in understanding migraine mechanisms, molecules and therapeutics	Review	2007	Goadsby P.J.	Trends in Molecular Medicine	13
23016767	Duplication of the sodium channel gene cluster on 2q24 in children with early onset epilepsy	Review	2012	Goeggel Simonetti B., Rieubland C., Courage C., Strozzi S., Tschumi S., Gallati S., Lemke J.R.	Epilepsia	53
31280948	Efficacy of antiepileptic drugs in the era of pharmacogenomics: A focus on childhood	Review	2019	Gogou M., Pavlou E.	European Journal of Paediatric Neurology	23
	Gene Therapy in Models of Severe Epilepsy due to Sodium Channelopathy	Comment	2020	Goldberg E.M.	Epilepsy Currents	20
31870697	Rodent genetic models of neurodevelopmental disorders and epilepsy	Review	2020	Gonzalez-Sulser A.	European Journal of Paediatric Neurology	24
	Preclinical animal models for Dravet syndrome: Seizure phenotypes, comorbidities and drug screening	Review	2018	Griffin A., Hamling K.R., Hong S., Anvar M., Lee L.P., Baraban S.C.	Frontiers in Pharmacology	9
22705271	Dravet syndrome: The main issues	Review	2012	Guerrini R.	European Journal of Paediatric Neurology	16
14734934	Epileptic Encephalopathies with Myoclonic Seizures in Infants and Children (Severe Myoclonic Epilepsy and Myoclonic-Astatic Epilepsy)	Review	2003	Guerrini R., Aicardi J.	Journal of Clinical Neurophysiology	20
21504426	Dravet syndrome and SCN1A gene mutation related-epilepsies: Cognitive impairment and its determinants	Review	2011	Guerrini R., Falchi M.	Developmental Medicine and Child Neurology	53
21463276	Neuroimaging and neuropathology of Dravet syndrome	Review	2011	Guerrini R., Striano P., Catarino C., Sisodiya S.M.	Epilepsia	52
26271793	Diagnostic Approach to Genetic Causes of Early-Onset Epileptic Encephalopathy	Review	2016	Gürsoy S., Erçal D.	Journal of Child Neurology	31
18759542	Migraine and epilepsy: Genetically linked?	Review	2008	Haan J., Van Den Maagdenberg A.M.J.M., Brouwer O.F., Ferrari M.D.	Expert Review of Neurotherapeutics	8
23859570	SCN1A, SCN2A and SCN3A gene polymorphisms and responsiveness to antiepileptic drugs: A multicenter cohort study and meta-analysis	Meta-Analysis	2013	Haerian B.S., Baum L., Kwan P., Tan H.J., Raymond A.A., Mohamed Z.	Pharmacogenomics	14
19464834	Sodium and potassium channel dysfunctions in rare and common idiopathic epilepsy syndromes	Review	2009	Hahn A., Neubauer B.A.	Brain and Development	31
23622210	Dravet syndrome (severe myoclonic epilepsy in infancy)	Review	2013	Handb Clin Neurol	Handb Clin Neurol	Handb Clin Neurol	Dravet C
	SCN1A IVS5N+5 G>A Polymorphism and Risk of Febrile Seizure and Epilepsy: A Systematic Review and Meta-Analysis	Review	2020	Hao J., Liu H., Ma J., Liu G., Dong G., Liu P., Xiao F.	Frontiers in Neurology	11
33839563	Epilepsy in patients with familial hemiplegic migraine	Review	2021	Hasırcı Bayır B.R., Tutkavul K., Eser M., Baykan B.	Seizure	88
26060908	Genetic causes of generalized epilepsies	Review	2015	Helbig I.	Seminars in Neurology	35
	Understanding genotypes and phenotypes in epileptic encephalopathies	Review	2016	Helbig I., Abou Tayoun A.N.	Molecular Syndromology	7
33411776	The dose makes the poison—Novel insights into Dravet syndrome and SCN1A regulation through nonproductive splicing	Review	2021	Helbig I., Goldberg E.	PLoS Genetics	17
23429546	Genetics of the epilepsies: Where are we and where are we going?	Review	2013	Helbig I., Lowenstein D.H.	Current Opinion in Neurology	26
19859879	Genetics components in patients with temporal lobe epilepsy [Factores genéticos asociados a la epilepsia del lóbulo temporal]	Review	2009	Herrera-Peco I., Fernández-Millares V., Pastor J., Hernando-Requejo V., Sola R.G., Alonso-Cerezo C.	Revista de Neurologia	49
	Genetics and gene therapy in Dravet syndrome	Review	2021	Higurashi N., Broccoli V., Hirose S.	Epilepsy and Behavior
34412058	Antisense Oligonucleotide Therapy for Neurodevelopmental Disorders	Review	2021	Hill S.F., Meisler M.H.	Developmental Neuroscience	43
28150151	Structure-based assessment of disease-related mutations in human voltage-gated sodium channels	Review	2017	Huang W., Liu M., Yan S.F., Yan N.	Protein and Cell	8
	The genetic relationship between epilepsy and hemiplegic migraine	Review	2017	Huang Y., Xiao H., Qin X., Nong Y., Zou D., Wu Y.	Neuropsychiatric Disease and Treatment	13
	Dravet syndrome	Review	2009	Incorpora G.	Italian Journal of Pediatrics	35
21855646	Migraine: Role of the TRESK two-pore potassium channel	Review	2011	Int J Biochem Cell Biol	Int J Biochem Cell Biol	Int J Biochem Cell Biol	Lafrenière RG
	Dravet Syndrome: Novel Approaches for the Most Common Genetic Epilepsy	Review	2021	Isom L.L., Knupp K.G.	Neurotherapeutics
19737414	Dravet syndrome	Review	2009	Ital J Pediatr	Ital J Pediatr	Ital J Pediatr	Incorpora G
25163687	Genotype phenotype associations across the voltage-gated sodium channel family	Review	2014	J Med Genet	J Med Genet	J Med Genet	Brunklaus A
21163495	Dravet syndrome: inroads into understanding epileptic encephalopathies	Review	2011	J Pediatr	J Pediatr	J Pediatr	Morse RP
	Structural genomic variants in pediatric seizure disorders	Review	2012	Jähn J.A., Helbig I.	Journal of Pediatric Epilepsy	1
24838856	Induced pluripotent stem cells for modeling of pediatric neurological disorders	Review	2014	Jang J., Quan Z., Yum Y.J., Song H.S., Paek S., Kang H.-C.	Biotechnology Journal	9
22787626	Genes in infantile epileptic encephalopathies	Review	2012	Jasper's Basic Mechanisms of the Epilepsies	Jasper's Basic Mechanisms of the Epilepsies	Jasper's Basic Mechanisms of the Epilepsies	Depienne C
22787613	Migraine and Epilepsy—Shared Mechanisms within the Family of Episodic Disorders	Review	2012	Jasper's Basic Mechanisms of the Epilepsies	Jasper's Basic Mechanisms of the Epilepsies	Jasper's Basic Mechanisms of the Epilepsies	Rogawski MA
24439681	Therapeutic potential of NaV1.1 activators	Review	2014	Jensen H.S., Grunnet M., Bastlund J.F.	Trends in Pharmacological Sciences	35
	Genomic and Epigenetic Advances in Focal Cortical Dysplasia Types I and II: A Scoping Review	Review	2021	Jesus-Ribeiro J., Pires L.M., Melo J.D., Ribeiro I.P., Rebelo O., Sales F., Freire A., Melo J.B.	Frontiers in Neuroscience	14
23850567	Sudden unexpected death in Dravet syndrome: Respiratory and other physiological dysfunctions	Review	2013	Kalume F.	Respiratory Physiology and Neurobiology	189
15277629	Effect of localization of missense mutations in SCN1A on epilepsy phenotype severity	Review	2004	Kanai K., Hirose S., Oguni H., Fukuma G., Shirasaka Y., Miyajima T., Wada K., Iwasa H., Yasumoto S., Matsuo M., Ito M., Mitsudome A., Kaneko S.	Neurology	63
19586930	Physicochemical property changes of amino acid residues that accompany missense mutations in SCN1A affect epilepsy phenotype severity	Meta-Analysis	2009	Kanai K., Yoshida S., Hirose S., Oguni H., Kuwabara S., Sawai S., Hiraga A., Fukuma G., Iwasa H., Kojima T., Kaneko S.	Journal of Medical Genetics	46
27815510	Voltage-gated sodium channels and pain-related disorders	Review	2016	Kanellopoulos A.H., Matsuyama A.	Clinical Science	130
28865303	Defects at the crossroads of GABAergic signaling in generalized genetic epilepsies	Review	2017	Kang J.-Q.	Epilepsy Research	137
24014518	Epilepsy, hippocampal sclerosis and febrile seizures linked by common genetic variation around SCN1A	Meta-Analysis	2013	Kasperavičiute D., Catarino C.B., Matarin M., Leu C., Novy J., Tostevin A., Leal B., Hessel E.V.S., Hallmann K., Hildebrand M.S., Dahl H.-H.M., Ryten M., Trabzuni D., Ramasamy A., Alhusaini S., Doherty C.P., Dorn T., Hansen J., Krämer G., Steinhoff B.J., Zumsteg D., Duncan S., Kälviäinen R.K., Eriksson K.J., Kantanen A.-M., Pandolfo M., Gruber-Sedlmayr U., Schlachter K., Reinthaler E.M., Stogmann…	Brain	136
	Dravet syndrome. An important syndrome for the practical paediatrician? [Das Dravet-syndrom: Ein für den kinderarzt in der praxis bedeutsames krankheitsbild?]	Review	2012	Keimer R., Kluger G.	Padiatrische Praxis	79
21865128	Dravet syndrome with an exceptionally good seizure outcome in two adolescents	Review	2011	Kobayashi K., Ohmori I., Ouchida M., Ohtsuka Y.	Epileptic Disorders	13
	Sleep related epilepsy and pharmacotherapy: An insight	Review	2018	Kumar J., Solaiman A., Mahakkanukrauh P., Mohamed R., Das S.	Frontiers in Pharmacology	9
	Migraine: Role of the TRESK two-pore potassium channel	Review	2011	Lafrenière R.G., Rouleau G.A.	International Journal of Biochemistry and Cell Biology	43
33395108	Dravet syndrome	Review	2021	Lagae L.	Current opinion in neurology	34
15620849	Paediatrics: genetic insights and long-term follow-up	Review	2005	Lancet Neurol	Lancet Neurol	Lancet Neurol	Forsyth R
33109474	Parkinsonism in children: Clinical classification and etiological spectrum	Review	2020	Leuzzi V., Nardecchia F., Pons R., Galosi S.	Parkinsonism and Related Disorders
	Association Between SCN1A rs2298771, SCN1A rs10188577, SCN2A rs17183814, and SCN2A rs2304016 Polymorphisms and Responsiveness to Antiepileptic Drugs: A Meta-Analysis	Review	2021	Li M., Zhong R., Lu Y., Zhao Q., Li G., Lin W.	Frontiers in Neurology	11
33761731	Genetic factors and the risk of drug-resistant epilepsy in young children with epilepsy and neurodevelopment disability: A prospective study and updated meta-analysis	Meta-Analysis	2021	Lin C.-H., Chou I.-C., Hong S.-Y.	Medicine	100
18627414	The clinical impact of pharmacogenetics on the treatment of epilepsy	Review	2009	Löscher W., Klotz U., Zimprich F., Schmidt D.	Epilepsia	50
18804930	A catalog of SCN1A variants	Review	2009	Lossin C.	Brain and Development	31
17765802	Genetic Polymorphisms and Idiopathic Generalized Epilepsies	Review	2007	Lucarini N., Verrotti A., Napolioni V., Bosco G., Curatolo P.	Pediatric Neurology	37
31904127	SCN1A/NaV1.1 channelopathies: Mechanisms in expression systems, animal models, and human iPSC models	Review	2019	Mantegazza M., Broccoli V.	Epilepsia	60
	Sodium Channelopathies: From Molecular Physiology towards Medical Genetics	Review	2018	Marakhonov A.V., Varenikov G.G., Skoblov M.Y.	Russian Journal of Genetics	54
	Na+ channelopathies and epilepsy: Recent advances and new perspectives	Review	2010	Marini C., Mantegazza M.	Expert Review of Clinical Pharmacology	3
21463275	The genetics of Dravet syndrome	Review	2011	Marini C., Scheffer I.E., Nabbout R., Suls A., De Jonghe P., Zara F., Guerrini R.	Epilepsia	52
22196487	Genes of early-onset epileptic encephalopathies: From genotype to phenotype	Review	2012	Mastrangelo M., Leuzzi V.	Pediatric Neurology	46
	PCDH19-Related Epilepsies	Review	2021	Mazzurco M., Pulvirenti G., Caccamo M., Presti S., Soma R., Salafia S., Praticò E.R., Filosco F., Falsaperla R., Praticò A.D.	Journal of Pediatric Neurology
	Genomics, intellectual disability, and autism	Review	2012	Mefford H.C., Batshaw M.L., Hoffman E.P.	New England Journal of Medicine	366
31904125	Dravet syndrome as part of the clinical and genetic spectrum of sodium channel epilepsies and encephalopathies	Review	2019	Mei D., Cetica V., Marini C., Guerrini R.	Epilepsia	60
	Gene interactions and modifiers in epilepsy	Article	2010	Meisler M.H.	Epilepsia	51
33531663	Sodium channelopathies in neurodevelopmental disorders	Review	2021	Meisler M.H., Hill S.F., Yu W.	Nature Reviews Neuroscience	22
11700294	Identification of epilepsy genes in human and mouse	Review	2001	Meisler M.H., Kearney J., Ottman R., Escayg A.	Annual Review of Genetics	35
16075041	Sodium channel mutations in epilepsy and other neurological disorders	Review	2005	Meisler M.H., Kearney J.A.	Journal of Clinical Investigation	115
11771652	Mutations of voltage-gated sodium channels in movement disorders and epilepsy	Review	2002	Meisler M.H., Kearney J.A., Sprunger L.K., MacDonald B.T., Buchner D.A., Escayg A.	Novartis Foundation Symposium	241
20351042	Sodium channel gene family: Epilepsy mutations, gene interactions and modifier effects	Review	2010	Meisler M.H., O'Brien J.E., Sharkey L.M.	Journal of Physiology	588
	Epilepsy-Related Voltage-Gated Sodium Channelopathies: A Review	Review	2020	Menezes L.F.S., Sabiá Júnior E.F., Tibery D.V., Carneiro L.D.A., Schwartz E.F.	Frontiers in Pharmacology	11
	Role of Pharmacogenetics in Adverse Drug Reactions: An Update towards Personalized Medicine	Review	2021	Micaglio E., Locati E.T., Monasky M.M., Romani F., Heilbron F., Pappone C.	Frontiers in Pharmacology	12
22618127	Genetics of epilepsy and relevance to current practice	Article	2012	Michelucci R., Pasini E., Riguzzi P., Volpi L., Dazzo E., Nobile C.	Current Neurology and Neuroscience Reports	12
34147886	Age-related evolution of EEG in Dravet syndrome: Meta-analysis of 155 patients	Review	2021	Minato E., Myers K.A.	Seizure	91
33275464	Advances in the design and discovery of novel small molecule drugs for the treatment of Dravet Syndrome	Review	2021	Miziak B., Czuczwar S.	Expert Opinion on Drug Discovery	16
27781027	Understanding Genotypes and Phenotypes in Epileptic Encephalopathies	Review	2016	Mol Syndromol	Mol Syndromol	Mol Syndromol	Helbig I
17508172	Recent advances in the pharmacogenomics of pain and headache	Review	2007	Montagna P.	Neurological Sciences	28
	Epilepsy and sodium channel blockers	Review	2002	Moulard B., Bertrand D.	Expert Opinion on Therapeutic Patents	12
11690625	Ion channel variation causes epilepsies	Review	2001	Moulard B., Picard F., Le Hellard S., Agulhon C., Weiland S., Favre I., Bertrand S., Malafosse A., Bertrand D.	Brain Research Reviews	36
19139296	Translational research in epilepsy genetics: Sodium channels in man to interneuronopathy in mouse	Review	2009	Mullen S.A., Scheffer I.E.	Archives of Neurology	66
	Genetic variations and associated pathophysiology in the management of epilepsy	Review	2011	Mulley J.C., Dibbens L.M.	Application of Clinical Genetics	4
21269290	Epilepsy and the new cytogenetics	Review	2011	Mulley J.C., Mefford H.C.	Epilepsia	52
12644745	Channelopathies as a genetic cause of epilepsy	Review	2003	Mulley J.C., Scheffer I.E., Petrou S., Berkovic S.F.	Current Opinion in Neurology	16
15880351	SCN1A mutations and epilepsy	Review	2005	Mulley J.C., Scheffer I.E., Petrou S., Dibbens L.M., Berkovic S.F., Harkin L.A.	Human Mutation	25
18302128	Autism, epilepsy and genetics [Autismo, epilepsia y genética]	Review	2008	Muñoz-Yunta J.A., Palau-Baduell M., Salvadó-Salvadó B., Valls Santasusana A., Rosendo-Moreno N., Clofent-Torrentó M., Manchado F.	Revista de Neurologia	46
31889633	Recent advances in treatment of epilepsy-related sodium channelopathies	Review	2020	Musto E., Gardella E., Møller R.S.	European Journal of Paediatric Neurology	24
30078767	Genetic literacy series: genetic epilepsy with febrile seizures plus	Review	2018	Myers K.A., Scheffer I.E., Berkovic S.F., on behalf of the ILAE Genetics Commission	Epileptic Disorders	20
33645379	Safety considerations selecting antiseizure medications for the treatment of individuals with Dravet syndrome	Review	2021	Nabbout R., Chemaly N., Chiron C., Kuchenbuch M.	Expert Opinion on Drug Safety	20
19201561	Progress in searching for the febrile seizure susceptibility genes	Review	2009	Nakayama J.	Brain and Development	31
16887333	Molecular genetics of febrile seizures	Review	2006	Nakayama J., Arinami T.	Epilepsy Research	70
	Genetic predisposition to febrile seizures [Genetische Disposition zu Fieberkrämpfen]	Review	2009	Neubauer B.A.	Zeitschrift fur Epileptologie	22
33911866	Exploring the Hereditary Nature of Migraine	Review	2021	Neuropsychiatr Dis Treat	Neuropsychiatr Dis Treat	Neuropsychiatr Dis Treat	Bron C
28479855	The genetic relationship between epilepsy and hemiplegic migraine	Review	2017	Neuropsychiatr Dis Treat	Neuropsychiatr Dis Treat	Neuropsychiatr Dis Treat	Huang Y
19723564	Neuroimaging and neurogenetics of epilepsy in humans	Review	2009	Neuroscience	Neuroscience	Neuroscience	Siniatchkin M
23291792	Dravet syndrome, what is new?	Review	2013	Neurosciences (Riyadh)	Neurosciences (Riyadh)	Neurosciences (Riyadh)	Al-Baradie RS
34378168	Dravet Syndrome: Novel Approaches for the Most Common Genetic Epilepsy	Review	2021	Neurotherapeutics	Neurotherapeutics	Neurotherapeutics	Isom LL
	Mutation of the SCN1A gene – Genetic cause of epilepsy [Mutacija SCN1A gena – Genski uzrok epilepsije]	Review	2015	Nišević J.R., Prpić I., Sasso A.	Medicina Fluminensis	51
15508916	Severe myoclonic epilepsy in infancy: clinical analysis and relation to SCN1A mutations in a Japanese cohort.	Review	2005	Oguni H., Hayashi K., Osawa M., Awaya Y., Fukuyama Y., Fukuma G., Hirose S., Mitsudome A., Kaneko S.	Advances in neurology	95
22905747	Sodium channels and the neurobiology of epilepsy	Review	2012	Oliva M., Berkovic S.F., Petrou S.	Epilepsia	53
26503606	An update on transcriptional and post-translational regulation of brain voltage-gated sodium channels	Review	2016	Onwuli D.O., Beltran-Alvarez P.	Amino Acids	48
29804481	Clinical reappraisal of the influence of drug-transporter polymorphisms in epilepsy	Review	2018	Orlandi A., Paolino M.C., Striano P., Parisi P.	Expert Opinion on Drug Metabolism and Toxicology	14
	Dravet syndrome (severe myoclonic epilepsy of infancy)	Review	2009	Pahlavan G.	Drugs of the Future	34
23884151	The SCN1A gene variants and epileptic encephalopathies	Review	2013	Parihar R., Ganesh S.	Journal of Human Genetics	58
	SCN1B gene: A close relative to SCN1A	Review	2021	Pasquetti E., Bianco M.L., Sullo F., Patanè F., Sciuto L., Polizzi A., Praticò A.D., Zanghì A., Falsaperla R.	Journal of Pediatric Neurology
	Dravet syndrome	Review	2015	Pérez A.B., Moreno N.	Salus	19
30870728	Identifying mutations in epilepsy genes: Impact on treatment selection	Review	2019	Perucca P., Perucca E.	Epilepsy Research	152
20101409	Sodium channelopathies and pain	Review	2010	Pflugers Arch	Pflugers Arch	Pflugers Arch	Lampert A
20648993	Pharmacoresistant epilepsy - Epidemiology and current studies [Padaczka oporna na leczenie - Epidemiologia i aktualny stan badań]	Review	2010	Pierzchała K.	Neurologia i Neurochirurgia Polska	44
23653348	SCN1A Genetic Test for Dravet Syndrome (Severe Myoclonic Epilepsy of Infancy and its Clinical Subtypes) for use in the Diagnosis, Prognosis, Treatment and Management of Dravet Syndrome	Review	2013	PLoS Curr	PLoS Curr	PLoS Curr	Stenhouse SA
	Towards identification of individual etiologies by resolving genomic and biological conundrums in patients with autism spectrum disorders	Review	2013	Poot M.	Molecular Syndromology	4
	Management of Dravet syndrome and emerging therapy options	Review	2017	Prager C., Cross J.H.	Expert Opinion on Orphan Drugs	5
28058944	Epilepsy in hemiplegic migraine: Genetic mutations and clinical implications	Review	2018	Prontera P., Sarchielli P., Caproni S., Bedetti C., Cupini L.M., Calabresi P., Costa C.	Cephalalgia	38
30027842	Migraine: Genetic variants and clinical phenotypes	Review	2019	Rainero I., Vacca A., Govone F., Gai A., Pinessi L., Rubino E.	Current Medicinal Chemistry	26
	Management of convulsive status epilepticus in children	Review	2015	Ram D., Martland T.	Paediatrics and Child Health (United Kingdom)	25
33937968	Dravet syndrome and Dravet syndrome-like phenotype: a systematic review of the SCN1A and PCDH19 variants	Review	2021	Rampazzo A.C.M., dos Santos R.R.P., Maluf F.A., Simm R.F., Marson F.A.L., Ortega M.M., de Aguiar P.H.P.	Neurogenetics	22
	Genetic and molecular biological aspects of febrile convulsions [Genetische und molekular-biologische aspekte von fieberkrämpfen]	Review	2001	Rebstock J., Haverkamp F., Heils A.	Monatsschrift fur Kinderheilkunde	149
22780858	Dravet syndrome: Seizure control and gait in adults with different SCN1A mutations	Review	2012	Rilstone J.J., Coelho F.M., Minassian B.A., Andrade D.M.	Epilepsia	53
19764027	Progressive neurocognitive decline in two children with Dravet syndrome, de novo SCN1A truncations and different epileptic phenotypes	Review	2009	Riva D., Vago C., Pantaleoni C., Bulgheroni S., Mantegazza M., Franceschetti S.	American Journal of Medical Genetics, Part A	149
	SCN1A and febrile seizures in mesial temporal epilepsy: An early signal to guide prognosis and treatment?	Comment	2014	Rossi M.A.	Epilepsy Currents	14
20187861	Management of sporadic and familial hemiplegic migraine	Review	2010	Russell M.B.	Expert Review of Neurotherapeutics	10
12483879	[Infantile-onset refractory grand mal epilepsy with variable seizures]	Review	2002	Ryoikibetsu Shokogun Shirizu	Ryoikibetsu Shokogun Shirizu	Ryoikibetsu Shokogun Shirizu	Imai K
12483862	[Severe myoclonic epilepsy in infancy]	Review	2002	Ryoikibetsu Shokogun Shirizu	Ryoikibetsu Shokogun Shirizu	Ryoikibetsu Shokogun Shirizu	Miura H
27228124	Genetic polymorphisms and the adequacy of brain stimulation: state of the art	Review	2016	Saghazadeh A., Esfahani S.A., Rezaei N.	Expert Review of Neurotherapeutics	16
24399675	Genetic background of febrile seizures	Review	2014	Saghazadeh A., Mastrangelo M., Rezaei N.	Reviews in the Neurosciences	25
32079034	Changing Landscape of Dravet Syndrome Management: An Overview	Review	2020	Samanta D.	Neuropediatrics	51
22704920	Diagnosis and long-term course of Dravet syndrome	Review	2012	Scheffer I.E.	European Journal of Paediatric Neurology	16
	Genetic testing in epilepsy: What should you be doing?	Review	2011	Scheffer I.E.	Epilepsy Currents	11
31904117	SCN1A-related phenotypes: Epilepsy and beyond	Review	2019	Scheffer I.E., Nabbout R.	Epilepsia	60
19203856	Dravet syndrome or genetic (generalized) epilepsy with febrile seizures plus?	Review	2009	Scheffer I.E., Zhang Y.-H., Jansen F.E., Dibbens L.	Brain and Development	31
	Dravet syndrome—toward an optimal and disease-specific treatment [Dravet-Syndrom – auf dem Weg zu einer optimalen und krankheitsspezifischen Behandlung]	Review	2021	Schoonjans A.-S., Ceulemans B.	Zeitschrift fur Epileptologie	34
	Low-dose fenfluramine in the treatment of neurologic disorders: Experience in Dravet syndrome	Review	2015	Schoonjans A.S., Lagae L., Ceulemans B.	Therapeutic Advances in Neurological Disorders	8
26843603	Model systems for studying cellular mechanisms of SCN1A-related epilepsy	Review	2016	Schutte S.S., Schutte R.J., Barragan E.V., O’Dowd D.K.	Journal of Neurophysiology	115
18599753	Epilepsy. When death strikes without warning	Review	2008	Science	Science	Science	Couzin J
	Genetic testing in epileptic encephalopathy: Rosetta stone or just an expensive rock?	Article	2016	Scott Perry M.	Epilepsy Currents	16
33677403	A systematic review of adults with Dravet syndrome	Review	2021	Selvarajah A., Zulfiqar-Ali Q., Marques P., Rong M., Andrade D.M.	Seizure	87
25312505	Advances on genetic rat models of epilepsy	Review	2015	Serikawa T., Mashimo T., Kuramoto T., Voigt B., Ohno Y., Sasa M.	Experimental Animals	64
23250121	Genetic testing of epileptic encephalopathies of infancy: An approach	Review	2013	Sharma S., Prasad A.	Canadian Journal of Neurological Sciences	40
22029951	Clinical spectrum of SCN2A mutations	Review	2012	Shi X., Yasumoto S., Kurahashi H., Nakagawa E., Fukasawa T., Uchiya S., Hirose S.	Brain and Development	34
27732919	Mortality in Dravet syndrome: A review	Review	2016	Shmuely S., Sisodiya S.M., Gunning W.B., Sander J.W., Thijs R.D.	Epilepsy and Behavior	64
18357670	Editorial - Epilepsy in Israel - 2008	Review	2008	Shuper A.	Harefuah	147
23919895	Migraine genetics: Part II	Review	2013	Silberstein S.D., Dodick D.W.	Headache	53
19666879	Severe epilepsy syndromes of early childhood: The link between genetics and pathophysiology with a focus on SCN1A mutations	Review	2009	Stafstrom C.E.	Journal of Child Neurology	24
18451712	Genetics of migraine: An update with special attention to genetic comorbidity	Review	2008	Stam A.H., Van Den Maagdenberg A.M.J.M., Haan J., Terwindt G.M., Ferrari M.D.	Current Opinion in Neurology	21
30020674	Hemiplegic Migraine	Review	2021	StatPearls	StatPearls	StatPearls	Kumar ASamanta DEmmady PDArora R
28880996	Dravet syndrome and its mimics: Beyond SCN1A	Review	2017	Steel D., Symonds J.D., Zuberi S.M., Brunklaus A.	Epilepsia	58
	SCN1A-associated epilepsy with foudroyant course: the long-term prognosis is not necessarily disastrous! [SCN1A-assoziierte Epilepsie mit foudroyantem Verlauf: Nicht immer muss die Langzeitprognose schlecht sein!]	Review	2021	Steinhoff B.J., Wiemer-Kruel A., Bast T.	Zeitschrift fur Epileptologie	34
11888238	Channelopathies can cause epilepsy in man	Review	2002	Steinlein O.K.	European Journal of Pain	6
11579435	Ion channels and epilepsy	Review	2001	Steinlein O.K.	American Journal of Medical Genetics - Seminars in Medical Genetics	106
24571113	Genetic epileptic encephalopathies: Is all written into the DNA?	Article	2013	Striano P., De Jonghe P., Zara F.	Epilepsia	54
	SCN1A and its related epileptic phenotypes	Review	2021	Sullo F., Pasquetti E., Patanè F., Bianco M.L., Marino S.D., Polizzi A., Falsaperla R., Ruggieri M., Zanghì A., Praticó A.D.	Journal of Pediatric Neurology
18846618	Gene symbol: SCN1A. Disease: Generalized epilepsy with febrile seizures plus.	Article	2008	Sun H., Zhang Y., Liang J., Liu X., Ma X., Wu H., Xu K., Qin J., Qi Y., Wu X.	Human genetics	124
18458705	Progress in molecular genetics of generalized epilepsy with febrile seizures plus	Review	2008	Sun H.H., Zhang Y.H.	Beijing da xue xue bao. Yi xue ban = Journal of Peking University. Health sciences	40
	What is new in dravet syndrome?	Review	2021	Sur L.M., Gaga R., Samasca G., Aldea C., Sur G., Lupan I.	Romanian Journal of Neurology/ Revista Romana de Neurologie	20
31226929	Advances in genetics of migraine	Review	2019	Sutherland H.G., Albury C.L., Griffiths L.R.	Journal of Headache and Pain	20
28271496	Genetics of Migraine: Insights into the Molecular Basis of Migraine Disorders	Review	2017	Sutherland H.G., Griffiths L.R.	Headache	57
31882278	Epilepsy and developmental disorders: Next generation sequencing in the clinic	Review	2020	Symonds J.D., McTague A.	European Journal of Paediatric Neurology	24
24076350	SCN1A rs3812718 polymorphism and susceptibility to epilepsy with febrile seizures: A meta-analysis	Review	2014	Tang L., Lu X., Tao Y., Zheng J., Zhao P., Li K., Li L.	Gene	533
22780699	Dissecting the genetic basis of myoclonic-astatic epilepsy	Review	2012	Tang S., Pal D.K.	Epilepsia	53
26600876	Low-dose fenfluramine in the treatment of neurologic disorders: experience in Dravet syndrome	Review	2015	Ther Adv Neurol Disord	Ther Adv Neurol Disord	Ther Adv Neurol Disord	Schoonjans AS
	Dravet syndrome: An update	Review	2013	Van Dam V.S., Korff C.M.	Schweizer Archiv fur Neurologie und Psychiatrie	164
	Transcriptional Regulation of Channelopathies in Genetic and Acquired Epilepsies	Review	2020	van Loo K.M.J., Becker A.J.	Frontiers in Cellular Neuroscience	13
22532537	Mesial temporal sclerosis in a cohort of children with SCN1A gene mutation	Review	2012	Van Poppel K., Patay Z., Roberts D., Clarke D.F., McGregor A., Perkins F.F., Wheless J.W.	Journal of Child Neurology	27
	Treatment of Dravet syndrome [Therapie des Dravet-Syndroms]	Review	2019	von Spiczak S., Stephani U.	Zeitschrift fur Epileptologie	32
25338670	Personalized medicine approaches in epilepsy	Review	2015	Walker L.E., Mirza N., Yip V.L.M., Marson A.G., Pirmohamed M.	Journal of Internal Medicine	277
26966048	Pharmacotherapy for Dravet Syndrome	Review	2016	Wallace A., Wirrell E., Kenney-Jung D.L.	Pediatric Drugs	18
16038283	Advances in the studies on the molecular and genetic aspects of epilepsy	Review	2005	Wang X., Wang T., Yuan M.X., Liu M.G., Wang Q.	Zhongguo yi xue ke xue yuan xue bao. Acta Academiae Medicinae Sinicae	27
30413604	Association between SCN1A polymorphism rs3812718 and valproic acid resistance in epilepsy children: A case-control study and meta-analysis	Meta-Analysis	2018	Wang Z.J., Chen J., Chen H.L., Zhang L.Y., Xu D., Jiang W.T.	Bioscience Reports	38
28488083	Ion Channel Genes and Epilepsy: Functional Alteration, Pathogenic Potential, and Mechanism of Epilepsy	Review	2017	Wei F., Yan L.-M., Su T., He N., Lin Z.-J., Wang J., Shi Y.-W., Yi Y.-H., Liao W.-P.	Neuroscience Bulletin	33
34011048	Effects of SCN1A and SCN2A polymorphisms on responsiveness to valproic acid monotherapy in epileptic children: A protocol for systematic review and meta-analysis	Meta-Analysis	2021	Wen Z., Chen J., Zhu B., Lu Y., Chen L.	Medicine	100
19952750	Vaccine safety: Current systems and recent findings	Review	2010	Wharton M.	Current Opinion in Pediatrics	22
32165031	Dravet Syndrome: A Review of Current Management	Review	2020	Wheless J.W., Fulton S.P., Mudigoudar B.D.	Pediatric Neurology	107
22178301	Molecular biology of epilepsy genes	Review	2013	Williams C.A., Battaglia A.	Experimental Neurology	244
24709890	The challenges and innovations for therapy in children with epilepsy	Review	2014	Wilmshurst J.M., Berg A.T., Lagae L., Newton C.R., Cross J.H.	Nature Reviews Neurology	10
31549357	Recent Advances in the Drug Treatment of Dravet Syndrome	Review	2019	Wirrell E.C., Nabbout R.	CNS Drugs	33
15618878	Epilepsy and sodium channel gene mutations: Gain or loss of function?	Review	2005	Yamakawa K.	NeuroReport	16
19203854	Molecular basis of severe myoclonic epilepsy in infancy	Review	2009	Yamakawa K.	Brain and Development	31
16806834	Na channel gene mutations in epilepsy-the functional consequences	Review	2006	Yamakawa K.	Epilepsy Research	70
21463284	Molecular and cellular basis: Insights from experimental models of Dravet syndrome	Review	2011	Yamakawa K.	Epilepsia	52
15651314	Molecular genetics of epilepsy	Review	2004	Yamakawa K.	Clinical Neurology	44
28527083	Shared mechanisms of epilepsy, migraine and affective disorders	Review	2017	Zarcone D., Corbetta S.	Neurological Sciences	38
15984191	[Molecular genetic aspects of epilepsy]	Review	2005	Zh Nevrol Psikhiatr Im S S Korsakova	Zh Nevrol Psikhiatr Im S S Korsakova	Zh Nevrol Psikhiatr Im S S Korsakova	Fattakhova AKh
	Genetic basis of pediatric epilepsy syndromes	Review	2017	Zhang D., Liu X., Deng X.	Experimental and Therapeutic Medicine	13
1	Migraine in the era of precision medicine	Review	2016	Zhang L.-M., Dong Z., Yu S.-Y.	Annals of Translational Medicine	4
34218210	Association between SCN1A polymorphism and carbamazepine responsiveness in epilepsy: A meta-analysis	Review	2021	Zhang X., Liu J., Ye J.	Epilepsy Research	176
33756436	Associations between CYP3A4, CYP3A5 and SCN1A polymorphisms and carbamazepine metabolism in epilepsy: A meta-analysis	Meta-Analysis	2021	Zhao G.-X., Zhang Z., Cai W.-K., Shen M.-L., Wang P., He G.-H.	Epilepsy Research	173
29605548	SCN1A rs3812718 polymorphism is associated with epilepsy: An updated meta-analysis	Review	2018	Zhi H., Wu C., Yang Z.	Epilepsy Research	142
19099699	[Progress in molecular genetics in severe myoclonic epilepsy of infancy]	Review	2008	Zhonghua Er Ke Za Zhi	Zhonghua Er Ke Za Zhi	Zhonghua Er Ke Za Zhi	Sun HH
19099891	[Sodium channel alpha-1-subunit gene mutations and epilepsy]	Review	2008	Zhonghua Er Ke Za Zhi	Zhonghua Er Ke Za Zhi	Zhonghua Er Ke Za Zhi	Wang JW
12476426	[Progress in molecular genetics of epilepsy]	Review	2002	Zhonghua Yi Xue Yi Chuan Xue Za Zhi	Zhonghua Yi Xue Yi Chuan Xue Za Zhi	Zhonghua Yi Xue Yi Chuan Xue Za Zhi	Tang B
	Current Treatment Strategies and Future Treatment Options for Dravet Syndrome	Review	2018	Ziobro J., Eschbach K., Sullivan J.E., Knupp K.G.	Current Treatment Options in Neurology	20
19666878	Clinical evaluation and diagnosis of severe epilepsy syndromes of early childhood	Review	2009	Zupanc M.L.	Journal of Child Neurology	24

## Sheet: Comment，letter，etc(97）
20816412	Genetics of headaches	Book	2010	Van Den Maagdenberg A.M.J.M., Terwindt G.M., Haan J., Frants R.R., Ferrari M.D.	Handbook of Clinical Neurology	97
	Cannabis and endocannabinoid signaling in Epilepsy	Book Chapter	2015	Katona I.	Handbook of Experimental Pharmacology	231
	Channelopathies	Book Chapter	2014	Jarzembowski J.A.	Pathobiology of Human Disease: A Dynamic Encyclopedia of Disease Mechanisms
	Computer Simulations of Sodium Channel Mutations that Cause Generalized Epilepsy With Febrile Seizures Plus	Book Chapter	2008	Spampanato J., Goldin A.L.	Computational Neuroscience in Epilepsy
	Dravet syndrome (severe myoclonic epilepsy in infancy)	Book Chapter	2013	Dravet C., Oguni H.	Handbook of Clinical Neurology	111
28674986	Epileptic encephalopathies as neurodegenerative disorders	Book Chapter	Advances in Neurobiology	15	15	15
	Genetic background of encephalopathy	Book Chapter	2018	Ishii A., Hirose S.	Acute Encephalopathy and Encephalitis in Infancy and Its Related Disorders
29478594	Genetics of epilepsy	Book Chapter	2018	Nolan D., Fink J.	Handbook of Clinical Neurology	148
	Ion Channels: Sodium Channel Mutations that Cause GEFS+	Book Chapter	2009	Goldin A.L.	Encyclopedia of Basic Epilepsy Research
	Malformations of cortical development and epilepsy in children	Book Chapter	2019	Luna B., Felty Q., Roy D., Bhatia S., Ragheb J., Miller I., Jayakar P.	Encyclopedia of Environmental Health
25194485	Mechanisms underlying epilepsies associated with sodium channel mutations	Book Chapter	2014	Steinlein O.K.	Progress in Brain Research	213
	Migraine; Genetics	Book Chapter	2014	de Vries B., Haan J., van den Maagdenberg A.M.J.M., Ferrari M.D.	Encyclopedia of the Neurological Sciences
	Nav1.1 voltage-gated sodium channel	Book Chapter	2007	Scholz A.	xPharm: The Comprehensive Pharmacology Reference
25194493	New technologies in molecular genetics. the impact on epilepsy research	Book Chapter	2014	Helbig I.	Progress in Brain Research	213
	Seizure and epilepsy: Studies of seizure disorders in drosophila	Book Chapter	2011	Parker L., Howlett I.C., Rusan Z.M., Tanouye M.A.	International Review of Neurobiology	99
	Sodium channel mutations that cause genetic epilepsy with febrile seizures plus	Book Chapter	2016	Goldin A.L.	The Curated Reference Collection in Neuroscience and Biobehavioral Psychology
17166794	Epilepsy: clinical observations and novel mechanisms	Comment	2007	Lancet Neurol	Lancet Neurol	Lancet Neurol	Spencer S
27651130	Genetic Testing Requires NGS and Sanger Methodologies	Comment	2016	Pediatr Neurol Briefs	Pediatr Neurol Briefs	Pediatr Neurol Briefs	Jennings LJ
22843408	How Dravet syndrome became a model for studying childhood genetic epilepsies	Comment	2012	Brain	Brain	Brain	Dravet C
19398712	Phenomenology of prolonged febrile seizures: results of the FEBSTAT study	Comment	2009	Neurology	Neurology	Neurology	Herrera EA
	Structure-Function Properties in Sodium Channelopathies: Considerations for Targeted Therapy	Comment	2020	Goldman A.	Epilepsy Currents	20
	TANGO With SCN1A: Can This Molecular Dance Defeat Dravet Syndrome?	Comment	2021	Wagnon J.L.	Epilepsy Currents	21
	The Heated Relationship Between Neural Activity and Seizures	Comment	2021	Weston M.C.	Epilepsy Currents	21
24328832	The multiple faces of Dravet syndrome	Comment	2014	Andrade D.M.	Developmental Medicine and Child Neurology	56
	The novel p.L1649Q mutation in the SCN1A epilepsy gene is associated with familial hemiplegic migraine: Genetic and functional studies. Mutation in brief #957 - Commentary	Comment	2008	Tepper S.J.	Headache	48
1	Age Is Just a Number: Adults Deserve the Same Access to Genetic Testing as Children	Comment	2020	Perry M.S.	Epilepsy Currents	20
24623837	Comment: Dravet syndrome-"Old gene," novel mechanism	Comment	2014	Xu M.	Neurology	82
	Comments	Comment	2009	Kaniecki R.G.	Headache	49
	Comments	Comment	2009	Taylor F.R.	Headache	49
	Dravet Syndrome: A Developmental and Epileptic Encephalopathy	Comment	2019	Lopez-Santiago L., Isom L.L.	Epilepsy Currents	19
32591755	EAN congress highlights challenges — predict, prevent, repair	Comment	Nature Reviews Neurology	16	16	16
33340487	Epilepsy in 2020—a new dawn	Comment	2021	Cross J.H.	The Lancet Neurology	20
24126623	Epilepsy: Genetic variant in subtype of MTLE	Comment	Nature Reviews Neurology	9	9	9
31862247	Epileptic encephalopathies of infancy: welcome advances	Comment	The Lancet	394	394	394
23186389	Genetic testing improves care for infantile-onset epilepsy: The story of SCN1A	Comment	2013	Berg A.T.	Developmental Medicine and Child Neurology	55
	Genetics and the myth of vaccine encephalopathy	Comment	2008	Doja A.	Paediatrics and Child Health	13
	Getting a Foot IN the Door: GABAergic INterneuron-Specific Enhancers	Comment	2021	Goldberg E.M.	Epilepsy Currents	21
	Heating up: The genetics of febrile seizures	Comment	2014	Mefford H.C.	Science Translational Medicine	6
	Is Targeting of Compensatory Ion Channel Gene Expression a Viable Therapeutic Strategy for Dravet Syndrome?	Comment	2019	Isom L.L.	Epilepsy Currents	19
27543003	Migraine genetics: From genome-wide association studies to translational insights	Comment	Genome Medicine	8	8	8
	Meta-analysis revives genome-wide association studies in epilepsy	Comment	2015	Poduri A.	Epilepsy Currents	15
16059449	A plethora of SCN1A mutations: what can they tell us?	Comment	2005	Epilepsy Curr	Epilepsy Curr	Epilepsy Curr	Wallace R
30838929	Dravet Syndrome: A Developmental and Epileptic Encephalopathy	Comment	2019	Epilepsy Curr	Epilepsy Curr	Epilepsy Curr	Lopez-Santiago L
27857626	Expecting the Unexpected: Lack of In Vivo Network Defects in an Scn1a Model of Dravet Syndrome	Comment	2016	Epilepsy Curr	Epilepsy Curr	Epilepsy Curr	Hull JM
31035820	Is Targeting of Compensatory Ion Channel Gene Expression a Viable Therapeutic Strategy for Dravet Syndrome?	Comment	2019	Epilepsy Curr	Epilepsy Curr	Epilepsy Curr	Isom LL
25170313	SCN1A and Febrile Seizures in Mesial Temporal Epilepsy: An Early Signal to Guide Prognosis and Treatment?	Comment	2014	Epilepsy Curr	Epilepsy Curr	Epilepsy Curr	Rossi MA
15346159	SCN1A in SMEI, ICEGTC, and GEFS+: Alphabet Soup or Emerging Genotypic-Phenotypic Clarity?	Comment	2003	Epilepsy Curr	Epilepsy Curr	Epilepsy Curr	Stafstrom CE
34025276	TANGO With SCN1A: Can This Molecular Dance Defeat Dravet Syndrome?	Comment	2020	Epilepsy Curr	Epilepsy Curr	Epilepsy Curr	Wagnon JL
24872787	Untangling the dravet syndrome seizure network: the changing face of a rare genetic epilepsy	Comment	2014	Epilepsy Curr	Epilepsy Curr	Epilepsy Curr	Chopra R
31257984	Beyond Dravet Syndrome: Characterization of a Novel, More Severe SCN1A-Linked Epileptic Encephalopathy	Comment	2019	Epilepsy Curr	Epilepsy Curr	Epilepsy Curr	Beck VC
	Novel bandlike signal abnormality suggestive of heterotopia in patient with a KCNQ1 frameshift mutation	Comment	2017	Sabharwal P., Devinsky O., M. Shepherd T.	Epilepsia Open	2
19666877	Advances in the identification and management of severe epilepsy syndromes of early childhood: Focus on SCN1A	Editorial	2009	Douglass L.M.	Journal of Child Neurology	24
28566552	Advancing the phenome alongside the genome in epilepsy studies	Editorial	2017	Helbig I., Lindhout D.	Neurology	89
26559170	Barriers to the use of genetic information for the development of new epilepsy treatments	Editorial	2016	Ferraro T.N.	Expert Review of Neurotherapeutics	16
28538129	Cannabinoids for Epilepsy - Real Data, at Last	Editorial	New England Journal of Medicine	376	376	376
21248272	Does genotype determine phenotype? Sodium channel mutations in Dravet syndrome and GEFS+	Editorial	2011	Neurology	Neurology	Neurology	Scheffer IE
27316245	Dravet syndrome	Editorial	2016	Guerrini R., Striano P.	Neurology	87
	Editorial: Experimental & Clinical Epilepsy and Related Comorbidities	Editorial	2020	Shaikh M.F., Chakraborti A., Ravizza T., O’Brien T.J., Abdullah J.M.	Frontiers in Pharmacology	11
	Editorial: Interplay Between Ion Channels, the Nervous System, and Embryonic Development	Editorial	2021	Levin M., Ribera A.B.	Frontiers in Molecular Neuroscience	14
17932953	Epilepsy genetics: Yet more exciting news	Editorial	Annals of Neurology	62	62	62
20484680	Key epilepsy gene gets further phenotypic delineation	Editorial	2010	Sheth R.D., Berkovic S.F.	Neurology	75
31980364	Precision medicine in sodium channelopathies – Moving beyond seizure control towards disease modification	Editorial	2020	Brunklaus A.	European Journal of Paediatric Neurology	24
12566273	Severe infantile epilepsies: Molecular genetics challenge clinical classification	Editorial	2003	Scheffer I.E.	Brain	126
20739784	Sporadic hemiplegic migraine in children	Editorial	2010	Pienczk-Reclawowicz K., Pilarska E., Lemka M.	Neurology India	58
	The effect of SCN1A mutations on patient-derived GABAergic neurons: What are the implications for future Dravet syndrome therapeutics?	Editorial	2013	Higurashi N., Okano H., Hirose S.	Future Neurology	8
33850219	Author Correction: Epilepsy and neuropsychiatric comorbidities in mice carrying a recurrent Dravet syndrome SCN1A missense mutation (Scientific Reports, (2019), 9, 1, (14172), 10.1038/s41598-019-50627-w)	Erratum	2021	Ricobaraza A., Mora-Jimenez L., Puerta E., Sanchez-Carpintero R., Mingorance A., Artieda J., Nicolas M.J., Besne G., Bunuales M., Gonzalez-Aparicio M., Sola-Sevilla N., Valencia M., Hernandez-Alcoceba R.	Scientific Reports	11
33170338	Correction to: Genes associated with survival of female bovine blastocysts produced in vivo (Cell and Tissue Research, (2020), 382, 3, (665-678), 10.1007/s00441-020-03257-y)	Erratum	2020	Zolini A.M., Block J., Rabaglino M.B., Rincon G., Hoelker M., Bromfield J.J., Salilew-Wondim D., Hansen P.J.	Cell and Tissue Research	382
30673603	Erratum: Augmented Reticular Thalamic Bursting and Seizures in Scn1a-Dravet Syndrome (Cell Reports (2019) 26(1) (54–64.e6), (S2211124718319296), (10.1016/j.celrep.2018.12.018))	Erratum	2019	Ritter-Makinson S., Clemente-Perez A., Higashikubo B., Cho F.S., Holden S.S., Bennett E., Chkhaidze A., Eelkman Rooda O.H.J., Cornet M.-C., Hoebeek F.E., Yamakawa K., Cilio M.R., Delord B., Paz J.T.	Cell Reports	26
	Corrigendum to A catalog of SCN1A variants [Brain Dev. 2009 Feb;31(2):114-30]	Erratum	2014	Lossin C.	Brain and Development	36
	Erratum: Familial occurrence of febrile seizures and epilepsy in Severe Myoclonic Epilepsy of Infancy (SMEI) patients with SCN1A mutations (Epilepsia (2006) 47, 10, (1629-1635))	Erratum	2007	[无可用作者姓名]	Epilepsia	48
	Erratum: Generation of the SCN1A epilepsy mutation in hiPS cells using the TALEN technique (Scientific Reports (2015) 4 (5404) DOI: 10.1038/srep05404)	Erratum	2015	Chen W., Liu J., Zhang L., Xu H., Guo X., Deng S., Liu L., Yu D., Chen Y., Li Z.	Scientific Reports	5
32414541	Corrigendum to “A single-center, retrospective analysis of genotype–phenotype correlations in children with Dravet syndrome” [Seizure: Eur. J. Epilepsy 75 (2020) 1–6] (Seizure: European Journal of Epilepsy (2020) 75 (1–6), (S1059131119304467), (10.1016/j.seizure.2019.12.009))	Erratum	Seizure	80	80	80
26122191	Corrigendum: Generation of the SCN1A epilepsy mutation in hiPS cells using the TALEN technique	Erratum	2015	Sci Rep	Sci Rep	Sci Rep	Chen W
18554361	A functional polymorphism in the SCN1A gene is not associated with carbamazepine dosages in Austrian patients with epilepsy	Letter	2008	Zimprich F., Stogmann E., Bonelli S., Baumgartner C., Mueller J.C., Meitinger T., Zimprich A., Strom T.M.	Epilepsia	49
31621611	A novel developmental encephalopathy with epilepsy and hyperkinetic movement disorders associated with a deletion of the sodium channel gene cluster on chromosome 2q24.3	Letter	Parkinsonism and Related Disorders	68	68	68
21416599	An interstitial duplication at 2q24.3 involving the SCN1A, SCN2A, SCN3A genes associated with infantile epilepsy	Letter	2011	Raymond G., Wohler E., Dinsmore C., Cox J., Johnston M., Batista D., Wang T.	American Journal of Medical Genetics, Part A	155
23504253	Authors' response to correspondence on "mesial temporal sclerosis in a cohort of children with SCN1A gene mutation"	Letter	2013	Van Poppel K., Patay Z., Roberts D., Clarke D., McGregor A., Perkins F.F., Wheless J.	Journal of Child Neurology	28
18251842	Can SCN1A mutations account for SUDEP? - Commentary on Hindocha et al. [4]	Letter	2008	Nabbout R.	Epilepsia	49
18251840	Cardiac arrhythmias and SUDEP - Commentary on Hindocha et al. [3]	Letter	2008	Cooper P.N.	Epilepsia	49
	Comment	Letter	2008	Selmer K.K., Egeland T., Solaas M.H., Nakken K.O., Kjeldsen M.J., Friis M.L., Brandal K., Corey L.A., Undlien D.E.	Acta Neurologica Scandinavica	118
18554360	Do SCN1A mutations protect from hippocampal sclerosis?	Letter	2008	Auvin S., Dulac O., Vallée L.	Epilepsia	49
25342058	Dravet syndrome and disease mitochondrial, ¿comorbid conditions? [Síndrome de Dravet y enfermedad mitocondrial, ¿patologías comórbidas?]	Letter	2014	Cantarín-Extremera V., Luz Ruiz-Falcó Rojas M., García-Fernández M., Duat-Rodríguez A., López-Marín L., Calleja-Gero M.L.	Revista de Neurologia	59
27653866	Dravet syndrome with autism inherited from a paternal mosaic heterozygous mutation on SCN1A	Letter	2016	Xiong Z., Yi L., Cao D., He W., Chen J., Gao S., Sun X.	Journal of the Neurological Sciences	369
18251841	Epilepsy and the long QT syndrome: Is there a link? - Commentary on Hindocha et al. [2]	Letter	2008	Stramba-Badiale M.	Epilepsia	49
30060894	First report on the association of SCN1A mutation, childhood schizophrenia and autism spectrum disorder without epilepsy	Letter	2018	Papp-Hertelendi R., Tényi T., Hadzsiev K., Hau L., Benyus Z., Csábi G.	Psychiatry Research	270
25885068	Maternal germinal mosaicism for SCN1A in sibs with a mild form of Dravet syndrome	Letter	2015	Guala A., Peruzzi C., Gennaro E., Pennese L., Danesino C.	American Journal of Medical Genetics, Part A	167
23504252	Mesial temporal sclerosis in children with SCN1A mutation	Letter	2013	Siegler Z., Fogarasi A.	Journal of Child Neurology	28
26169758	Mitochondrial respiratory chain defects in skin fibroblasts from patients with Dravet syndrome	Letter	2015	Doccini S., Meschini M.C., Mei D., Guerrini R., Sicca F., Santorelli F.M.	Neurological Sciences	36
29694806	Parental mosaicism in “De Novo” epileptic encephalopathies	Letter	New England Journal of Medicine	378	378	378
32659653	Response to: Deng L, Ma A, Wood N, Ardern-Holmes S. Vaccination management in an asymptomatic child with a novel SCN1A variant and family history of status epilepticus following vaccination: A case report on a potential new direction in personalised medicine. Seizure. 2020;78:49-52	Letter	2020	Shafrir Y.	Seizure	80
27497770	SCN1A Mutation or Cross Talk? The Connection Between the Heart and Brain	Letter	2016	Ozturk S., Yetkin E.	Pediatric Neurology	63
29952450	SCN1A variant and cannabidiol use	Letter	2018	Reynolds C., Finnegan R., Forman E., King M.D.	Irish Medical Journal	111
18616623	SCN1A variant in a Scandinavian GEFS+ family: A wolf in sheep's clothing?	Letter	2008	Holland K.D.	Acta Neurologica Scandinavica	118
18554359	Seven novel SCN1A mutations in Chinese patients with severe myoclonic epilepsy of infancy	Letter	2008	Sun H., Zhang Y., Liang J., Liu X., Ma X., Qin J., Qi Y., Wu X.	Epilepsia	49
17945146	The conundrum of complexity in epilepsy	Letter	Lancet Neurology	6	6	6
31831882	The case for implementing sustainable routine, population-level genomic reanalysis	Letter	Genetics in Medicine	22	22	22
20447869	Dravet syndrome and vaccination: when science prevails over speculation	Comment	2010	Lancet Neurol	Lancet Neurol	Lancet Neurol	Wiznitzer M

## Sheet: Non-English or Chinese (14)
1	The SCN1A gene analysis in patients with Febrile seizures [Analýza genu SCN1A u pacientů s febrilními záchvaty]	Article in Czech	2006	Tomek A., Mat'oška V., Marusič P., Krijtová H., Tomášek M., Peková S., Hedvičáková P., Goetz P., Bojar M., Komárek V.	Ceska a Slovenska Neurologie a Neurochirurgie	69
12829363	[Genetics of epilepsy: new discoveries]	Article in French	2003	Arch Pediatr	Arch Pediatr	Arch Pediatr	Chabrier S
17659861	[Vaccine encephalopathy: a myth collapses?]	Article in French	2007	Presse Med	Presse Med	Presse Med	Kahane P
23618705	Génétique de la migraine [Genetics of migraine]	Article in French	2013	Ducros A.	Revue Neurologique	169
21921541	[Molecular genetics of migraine applying DNA microarray-based comprehensive resequencing and high throughput linkage analysis system]	Article in Japanese	2010	Rinsho Shinkeigaku	Rinsho Shinkeigaku	Rinsho Shinkeigaku	Takahashi Y
24291842	Central Institute for the Molecular Pathomechanisms of Epilepsies	Article in Japanese]	2013	Hirose S.	Rinshō shinkeigaku = Clinical neurology	53
	Genotype-phenotype correlation in Dravet syndrome with SCN1A mutation increase efficiency of molecular diagnosis	Article in Portuguese	2012	Gonsales M.C., Preto P., Montenegro M.A., Guerreiro M.M., Lopes Cendes I.	Journal of Epilepsy and Clinical Neurophysiology	18
28005050	Genetics and treatment of early infantile epileptic encephalopathies [Genetika i differentsirovannoe lechenie rannikh epilepticheskikh entsefalopatii]	Article in Russian	2016	Sharkov A.A., Sharkova I.V., Belousova E.D., Dadali E.L.	Zhurnal nevrologii i psikhiatrii imeni S.S. Korsakova	116
20487708	Epilepsy onset between one month and three months of life: Our 11 years experience	Article in Spanish	2010	Pérez Delgado R., Lafuente Hidalgo M., López Pisón J., Sebastián Torres B., Torres Claveras S., García Jiménez M.C., Baldellou Vázquez A., Peña Segura J.L.	Neurologia	25
23786015	[Pharmacogenetic criteria of drug-resistant epilepsy].	Article in Ukrainian	2012	Oros M.M.	Likars'ka sprava / Ministerstvo okhorony zdorov'ia Ukraïny
23035603	[The new algorithm for disease management of patients with epilepsy based on genetic research]	Article in Ukrainian	2012	Lik Sprava	Lik Sprava	Lik Sprava	Oros MM
12235543	[Myoclonic-astatic epilepsy in early childhood: review of clinical signs, EEG features, etiology, and therapy]	Article in German	2002	Klin Padiatr	Klin Padiatr	Klin Padiatr	Weber P
30011152	[A case of Dravet syndrome complicated by human herpesvirus-6 infection-associated acute encephalopathy and choreoathetosis]	Article in Japanese	2017	No To Hattatsu	No To Hattatsu	No To Hattatsu	Nakamura Y
	Topiramate in dravet syndrome [Sindrome di dravet e topiramato: Descrizione di due casi]	Article in Italian	2002	Spanò M., Sgro D.L., Bruccini G., Puntorieri D., Pustorino G., Fiumanò L., Circo S., Arminio N., Tortorella G.	Bollettino - Lega Italiana contro l'Epilessia

## Sheet: irrelevant exposure (416)
17436242	Nova2 interacts with a cis-acting polymorphism to influence the proportions of drug-responsive splice variants of SCN1A	Article	2007	Am J Hum Genet	Am J Hum Genet	Am J Hum Genet	Heinzen EL
30176532	[ 18 F]fluorodeoxyglucose-positron emission tomography study of genetically confirmed patients with Dravet syndrome	Article	2018	Haginoya K., Togashi N., Kaneta T., Hino-Fukuyo N., Ishitobi M., Kakisaka Y., Uematsu M., Inui T., Okubo Y., Sato R., Miyabayashi T., Arai A., Ogiwara I., Mazaki E., Yamakawa K., Iinuma K., Kure S.	Epilepsy Research	147
25219203	[Src family kinases affect the expression of Nav1.1 in spiral ganglion neurons]	Article	2014	Zeng Q., Chen H., Su J.	Lin chuang er bi yan hou tou jing wai ke za zhi = Journal of clinical otorhinolaryngology, head, and neck surgery	28
	A child with febrile seizures plus and neurofibromatosis type 1 [Convulsioni febbrili plus in un paziente con neurofibromatosi di tipo 1]	Article	2011	Nicita F., Spalice A.	Area Pediatrica	12
18540863	A ChIP-cloning approach linking SIRT1 to transcriptional modificationof DNA targets.	Article	2008	Torres G., Frisella P.D., Yousuf S.J., Sarwar S., Baldinger L., Zakhary S.M., Leheste J.R.	BioTechniques	44
24417206	A common SCN1A splice-site polymorphism modifies the effect of carbamazepine on cortical excitability - A pharmacogenetic transcranial magnetic stimulation study	Article	2014	Menzler K., Hermsen A., Balkenhol K., Duddek C., Bugiel H., Bauer S., Schorge S., Reif P.S., Klein K.M., Haag A., Oertel W.H., Hamer H.M., Knake S., Trucks H., Sander T., Rosenow F.	Epilepsia	55
33455486	A critical evaluation of fenfluramine hydrochloride for the treatment of Dravet syndrome	Article	2021	Schoonjans A.-S., Ceulemans B.	Expert Review of Neurotherapeutics
18640800	A de novo KCNQ2 mutation detected in non-familial benign neonatal convulsions	Article	2009	Ishii A., Fukuma G., Uehara A., Miyajima T., Makita Y., Hamachi A., Yasukochi M., Inoue T., Yasumoto S., Okada M., Kaneko S., Mitsudome A., Hirose S.	Brain and Development	31
19710327	A functional null mutation of SCN1B in a patient with Dravet syndrome	Article	2009	Patino G.A., Claes L.R.F., Lopez-Santiago L.F., Slat E.A., Dondeti R.S.R., Chen C., O'Malley H.A., Gray C.B.B., Miyazaki H., Nukina N., Oyama F., De Jonghe P., Isom L.L.	Journal of Neuroscience	29
23148524	A homozygous mutation of voltage-gated sodium channel βi gene SCN1B in a patient with Dravet syndrome	Article	2012	Ogiwara I., Nakayama T., Yamagata T., Ohtani H., Mazaki E., Tsuchiya S., Inoue Y., Yamakawa K.	Epilepsia	53
11371648	A missense mutation of the Na+ channel alpha II subunit gene Na(v)1.2 in a patient with febrile and afebrile seizures causes channel dysfunction	Article	2001	Proc Natl Acad Sci U S A	Proc Natl Acad Sci U S A	Proc Natl Acad Sci U S A	Sugawara T
28544625	A mutation in GABRB3 associated with Dravet syndrome	Article	2017	Le S.V., Le P.H.T., Le T.K.V., Kieu Huynh T.T., Hang Do T.T.	American Journal of Medical Genetics, Part A	173
15028761	A Nonsense Mutation of the Sodium Channel Gene SCN2A in A Patient with Intractable Epilepsy and Mental Decline	Article	2004	Kamiya K., Kaneda M., Sugawara T., Mazaki E., Okamura N., Montal M., Makita N., Tanaka M., Fukushima K., Fujiwara T., Inoue Y., Yamakawa K.	Journal of Neuroscience	24
18184292	A novel ATP1A2 gene mutation in an Irish familial hemiplegic migraine kindred	Article	2008	Fernandez D.M., Hand C.K., Sweeney B.J., Parfrey N.A.	Headache	48
23918834	A novel ATP1A2 gene mutation in familial hemiplegic migraine and epilepsy	Article	2014	Costa C., Prontera P., Sarchielli P., Tonelli A., Bassi M.T., Cupini L.M., Caproni S., Siliquini S., Donti E., Calabresi P.	Cephalalgia	34
	A novel ATP1A2 gene variant associated with pure sporadic hemiplegic migraine improved after patent foramen ovale closure: A case report	Article	2018	Perrotta A., Gambardella S., Ambrosini A., Anastasio M.G., Albano V., Fornai F., Pierelli F.	Frontiers in Neurology	9
24874546	A novel de novo mutation of SCN8A (Nav1.6) with enhanced channel activation in a child with epileptic encephalopathy	Article	2014	Estacion M., O'Brien J.E., Conravey A., Hammer M.F., Waxman S.G., Dib-Hajj S.D., Meisler M.H.	Neurobiology of Disease	69
30306542	A novel GABAergic dysfunction in human Dravet syndrome	Article	2018	Ruffolo G., Cifelli P., Roseti C., Thom M., van Vliet E.A., Limatola C., Aronica E., Palma E.	Epilepsia	59
21035146	A novel mutation in CACNA1A associated with hemiplegic migraine, cerebellar dysfunction and late-onset cognitive decline	Article	2011	Freilinger T., Ackl N., Ebert A., Schmidt C., Rautenstrauss B., Dichgans M., Danek A.	Journal of the Neurological Sciences	300
22596016	A novel STXBP1 mutation causes focal seizures with neonatal onset	Article	2012	Vatta M., Tennison M.B., Aylsworth A.S., Turcott C.M., Guerra M.P., Eng C.M., Yang Y.	Journal of Child Neurology	27
21219303	A retrospective study of the relation between vaccination and occurrence of seizures in Dravet syndrome	Article	2011	Tro-Baumann B., Von Spiczak S., Lotte J., Bast T., Haberlandt E., Sassen R., Freund A., Leiz S., Stephani U., Boor R., Holthausen H., Helbig I., Kluger G.	Epilepsia	52
19763161	A role of SCN9A in human epilepsies, as a cause of febrile seizures and as a potential modifier of Dravet syndrome	Article	2009	Singh N.A., Pappas C., Dahle E.J., Claes L.R.F., Pruess T.H., De Jonghe P., Thompson J., Dixon M., Gurnett C., Peiffer A., White H.S., Filloux F., Leppert M.F.	PLoS Genetics	5
20420834	A sodium channel mutation linked to epilepsy increases ramp and persistent current of Nav1.3 and induces hyperexcitability in hippocampal neurons	Article	2010	Estacion M., Gasser A., Dib-Hajj S.D., Waxman S.G.	Experimental Neurology	224
27267376	Aberrant epilepsy-associated mutant Nav1.6 sodium channel activity can be targeted with cannabidiol	Article	2016	Patel R.R., Barbosa C., Brustovetsky T., Brustovetsky N., Cummins T.R.	Brain	139
14642997	Absence of mutations in major GEFS+ genes in myoclonic astatic epilepsy	Article	2003	Nabbout R., Kozlovski A., Gennaro E., Bahi-Buisson N., Zara F., Chiron C., Bianchi A., Brice A., Leguern E., Dulac O.	Epilepsy Research	56
17697789	Acute hepatic injury in four children with Dravet syndrome: valproic acid, topiramate or acetaminophen?	Case Reports	2008	Seizure	Seizure	Seizure	Nicolai J
25886476	Acute respiratory distress syndrome in a child with severe epileptic disorder treated successfully by extracorporeal membrane oxygenation: A case report	Article	BMC Pediatrics	15	15	15
28186331	Adult motor phenotype differentiates Dravet syndrome from Lennox-Gastaut syndrome and links SCN1A to early onset parkinsonian features	Article	2017	Aljaafari D., Fasano A., Nascimento F.A., Lang A.E., Andrade D.M.	Epilepsia	58
22670143	Adult Phenotypes in Angelman- and Rett-Like Syndromes	Article	2012	Mol Syndromol	Mol Syndromol	Mol Syndromol	Willemsen MH
27790929	Allele and genotype frequencies of genes relevant to anti-epileptic drug therapy in Mexican-Mestizo healthy volunteers	Article	2016	Pharmacogenomics	Pharmacogenomics	Pharmacogenomics	Fricke-Galindo I
17877748	Amino acid changes in the amino terminus of the Na,K-adenosine triphosphatase alpha-2 subunit associated to familial and sporadic hemiplegic migraine	Article	2007	Tonelli A., Gallanti A., Bersano A., Cardin V., Ballabio E., Airoldi G., Redaelli F., Candelise L., Bresolin N., Bassi M.T.	Clinical Genetics	72
31718537	An integrative methodology based on protein-protein interaction networks for identification and functional annotation of disease-relevant genes applied to channelopathies	Article	2019	Marín M., Esteban F.J., Ramírez-Rodrigo H., Ros E., Sáez-Lara M.J.	BMC Bioinformatics	20
31116409	An Old Drug for a New Indication: Repurposing Fenfluramine From an Anorexigen to an Antiepileptic Drug	Article	2019	Schoonjans A.-S., Ceulemans B.	Clinical Pharmacology and Therapeutics	106
18539001	An unexpected EEG course in Dravet syndrome	Article	2008	Epilepsy Res	Epilepsy Res	Epilepsy Res	Nabbout R
29753823	Analysis of differentially changed gene expression in EA.hy926 human endothelial cell after exposure of fine particulate matter on the basis of microarray profile	Article	Ecotoxicology and Environmental Safety	159	159	159
24850485	Antecollis and levodopa-responsive parkinsonism are late features of Dravet syndrome	Article	2014	Neurology	Neurology	Neurology	Fasano A
30368457	Assessment of parental mosaicism in SCN1A -related epilepsy by single-molecule molecular inversion probes and next-generation sequencing	Article	2019	De Lange I.M., Koudijs M.J., Van'T Slot R., Sonsma A.C.M., Mulder F., Carbo E.C., Van Kempen M.J.A., Nijman I.J., Ernst R.F., Savelberg S.M.C., Knoers N.V.A.M., Brilstra E.H., Koeleman B.P.C.	Journal of Medical Genetics	56
26314341	Association between PK/PD-involved gene polymorphisms and carbamazepine-individualized therapy	Article	2015	Ma C.-L., Jiao Z., Wu X.-Y., Hong Z., Wu Z.-Y., Zhong M.-K.	Pharmacogenomics	16
29353705	Association between SCN1A gene polymorphisms and drug resistant epilepsy in pediatric patients	Article	2018	Margari L., Legrottaglie A.R., Vincenti A., Coppola G., Operto F.F., Buttiglione M., Cassano A., Bartolomeo N., Mariggiò M.A.	Seizure	55
18489610	Association between SCN1A polymorphism and carbamazepine-resistant epilepsy	Article	2008	Abe T., Seo T., Ishitsu T., Nakagawa T., Hori M., Nakagawa K.	British Journal of Clinical Pharmacology	66
24921390	Association between two functional SNPs of SCNIA gene and efficacy of carbamazepine monotherapy for focal seizures in Chinese Han epileptic patients	Article	2014	Wang P., Zhou Q., Sheng Y., Tang B., Liu Z., Zhou B.	Journal of Central South University (Medical Sciences)	39
24861996	Association of ABCB1, CYP3A4, EPHX1, FAS, SCN1A, MICA, and BAG6 polymorphisms with the risk of carbamazepine-induced Stevens-Johnson syndrome/toxic epidermal necrolysis in Chinese Han patients with epilepsy	Article	2014	He X.-J., Jian L.-Y., He X.-L., Tang M., Wu Y., Xu Y.-Y., Sun X.-J., Zhao L.-M.	Epilepsia	55
24480790	Association of nonsense mutation in GABRG2 with abnormal trafficking of GABAA receptors in severe epilepsy	Article	2014	Ishii A., Kanaumi T., Sohda M., Misumi Y., Zhang B., Kakinuma N., Haga Y., Watanabe K., Takeda S., Okada M., Ueno S., Kaneko S., Takashima S., Hirose S.	Epilepsy Research	108
22188362	Association of polymorphisms in EPHX1, UGT2B7, ABCB1, ABCC2, SCN1A and SCN2A genes with carbamazepine therapy optimization	Article	2012	Hung C.-C., Chang W.-L., Ho J.-L., Tai J.J., Hsieh T.-J., Huang H.-C., Hsieh Y.-W., Liou H.-H.	Pharmacogenomics	13
27956748	Association of rare missense variants in the second intracellular loop of Na v 1.7 sodium channels with familial autism	Article	2018	Rubinstein M., Patowary A., Stanaway I.B., McCord E., Nesbitt R.R., Archer M., Scheuer T., Nickerson D., Raskind W.H., Wijsman E.M., Bernier R., Catterall W.A., Brkanac Z.	Molecular Psychiatry	23
	Association of SCN1A gene polymorphism with antiepileptic drug responsiveness in the population of Thrace, Greece	Article	2017	Angelopoulou C., Veletza S., Heliopoulos I., Vadikolias K., Tripsianis G., Stathi C., Piperidou C.	Archives of Medical Science	13
25155934	Association of SCN1A, SCN2A and ABCC2 gene polymorphisms with the response to antiepileptic drugs in Chinese Han patients with epilepsy	Article	2014	Ma C.-L., Wu X.-Y., Zheng J., Wu Z.-Y., Hong Z., Zhong M.-K.	Pharmacogenomics	15
32185219	Association of SCN1A, SCN2A, and UGT2B7 Polymorphisms with Responsiveness to Valproic Acid in the Treatment of Epilepsy	Article	2020	Lu Y., Su Q., Li M., Dayimu A., Dai X., Wang Z., Che F., Xue F.	BioMed Research International	2020
30835363	Association of single nucleotide polymorphisms of SCN1A gene with therapeutic effect of carbamazepine among ethnic Zhuang Chinese patients with epilepsy	Article	2019	Huang J., Qian Z., Chen H., Huang Q., Huang L., Liu G., Tang X.	Chinese Journal of Medical Genetics	36
27106592	Association study of MiRSNPs with schizophrenia, tardive dyskinesia and cognition	Article	Schizophrenia Research	174	174	174
20037572	Association study of the SCN1 gene polymorphism and effective dose of lamotrigine	Article	2009	Krikova E.V., Valdman E.A., Avakyan G.N., Andreev Y.A.A., Denisov E.V., Rider F.K., Biktimerov R.R., Chukanova A.S., Burd S.G.	Zhurnal Nevrologii i Psihiatrii imeni S.S. Korsakova	109
32105008	Ataxia, tremor, intellectual disability: A case of STXBP1 encephalopathy with a new mutation	Article	2019	Değerliyurt A., Kesen G.G., Ceylaner S.	Turkish Journal of Pediatrics	61
25838126	Benchmarking the stability of human detergent-solubilised voltage-gated sodium channels for structural studies using eel as a reference	Article	2015	Slowik D., Henderson R.	Biochimica et Biophysica Acta - Biomembranes	1848
20519669	Benign convulsions with mild gastroenteritis: Is it associated with sodium channel gene SCN1A mutation?	Article	2010	Weng W.-C., Hirose S., Lee W.-T.	Journal of Child Neurology	25
31290619	Biallelic variants in COX4I1 associated with a novel phenotype resembling Leigh syndrome with developmental regression, intellectual disability, and seizures	Article	American Journal of Medical Genetics, Part A	179	179	179
32090326	Biological concepts in human sodium channel epilepsies and their relevance in clinical practice	Article	2020	Brunklaus A., Du J., Steckler F., Ghanty I.I., Johannesen K.M., Fenger C.D., Schorge S., Baez-Nieto D., Wang H.-R., Allen A., Pan J.Q., Lerche H., Heyne H., Symonds J.D., Zuberi S.M., Sanders S., Sheidley B.R., Craiu D., Olson H.E., Weckhuysen S., DeJonge P., Helbig I., Van Esch H., Busa T., Milh M., Isidor B., Depienne C., Poduri A., Campbell A.J., Dimidschstein J., Møller R.S., Lal D.	Epilepsia	61
22003912	Biomarkers for antiepileptic drug response	Article	Biomarkers in Medicine	5	5	5
31601780	Ca2+-dependent recruitment of voltage-gated sodium channels underlies bilirubin-induced overexcitation and neurotoxicity	Article	2019	Shi H.-S., Lai K., Yin X.-L., Liang M., Ye H.-B., Shi H.-B., Wang L.-Y., Yin S.-K.	Cell Death and Disease	10
23103419	CACNA1A variants may modify the epileptic phenotype of Dravet syndrome	Article	2013	Ohmori I., Ouchida M., Kobayashi K., Jitsumori Y., Mori A., Michiue H., Nishiki T., Ohtsuka Y., Matsui H.	Neurobiology of Disease	50
34135856	CACNA1A-Linked Hemiplegic Migraine in GLUT 1 Deficiency Syndrome: A Case Report	Article	2021	Front Neurol	Front Neurol	Front Neurol	Scoppola C
34320921	CACNA1A-p.Thr501Met mutation associated with familial hemiplegic migraine: a family report	Article	2021	Romozzi M., Primiano G., Rollo E., Travaglini L., Calabresi P., Servidei S., Vollono C.	Journal of Headache and Pain	22
26076853	Carbamazepine and oxcarbazepine in adult patients with Dravet syndrome: Friend or foe?	Article	2015	Snoeijen-Schouwenaars F.M., Veendrick M.J.B.M., Van Mierlo P., Van Erp G., De Louw A.J.A., Kleine B.U., Schelhaas H.J., Tan I.Y.	Seizure	29
32207228	Cardiac arrhythmias in Dravet syndrome: an observational multicenter study	Article	2020	Shmuely S., Surges R., Helling R.M., Gunning W.B., Brilstra E.H., Verhoeven J.S., Cross J.H., Sisodiya S.M., Tan H.L., Sander J.W., Thijs R.D.	Annals of Clinical and Translational Neurology	7
	Cardiac Na+ channels as therapeutic targets for antiarrhythmic agents	Article	2006	Glaaser I.W., Clancy C.E.	Handbook of Experimental Pharmacology	171
23118319	Case 1: Perinasal and perioral rash in a 2-year-old girl	Article	2012	Tintle S.J., Antaya R.J., Halasz C.L.G.	Pediatrics in Review	33
32276107	Case-control association study of rare nonsynonymous variants of SCN1A and KCNQ2 in acute encephalopathy with biphasic seizures and late reduced diffusion	Article	2020	Shibata A., Kasai M., Terashima H., Hoshino A., Miyagawa T., Kikuchi K., Ishii A., Matsumoto H., Kubota M., Hirose S., Oka A., Mizuguchi M.	Journal of the Neurological Sciences	414
19734009	CDKL5 and ARX mutations are not responsible for early onset severe myoclonic epilepsy in infancy	Article	2009	Nabbout R., Depienne C., Chipaux M., Girard B., Souville I., Trouillard O., Dulac O., Chelly J., Afenjar A., Héron D., Leguern E., Beldjord C., Bienvenu T., Bahi-Buisson N.	Epilepsy Research	87
32144139	Central neurogenetic signatures of the visuomotor integration system	Article	2020	Bueichekú E., Aznárez-Sanado M., Diez I., Uquillas F.D., Ortiz-Terán L., Qureshi A.Y., Suñol M., Basaia S., Ortiz-Terán E., Pastor M.A., Sepulcre J.	Proceedings of the National Academy of Sciences of the United States of America	117
17544618	Characterization of 5′ untranslated regions of the voltage-gated sodium channels SCN1A, SCN2A, and SCN3A and identification of cis-conserved noncoding sequences	Article	2007	Martin M.S., Tang B., Ta N., Escayg A.	Genomics	90
26974309	Cleavage of Na+ channels by calpain increases persistent Na+ current and promotes spasticity after spinal cord injury	Article	2016	Brocard C., Plantier V., Boulenguez P., Liabeuf S., Bouhadfane M., Viallat-Lieutaud A., Vinay L., Brocard F.	Nature Medicine	22
24996492	Clinical and genetic analysis in alternating hemiplegia of childhood: Ten new patients from Southern Europe	Article	2014	Vila-Pueyo M., Pons R., Raspall-Chaure M., Marcé-Grau A., Carreño O., Sintas C., Cormand B., Pineda-Marfà M., Macaya A.	Journal of the Neurological Sciences	344
	Clinical and genetic characteristics of patients with Doose syndrome	Article	2020	Hinokuma N., Nakashima M., Asai H., Nakamura K., Akaboshi S., Fukuoka M., Togawa M., Oana S., Ohno K., Kasai M., Ogawa C., Yamamoto K., Okumiya K., Chong P.F., Kira R., Uchino S., Fukuyama T., Shinagawa T., Miyata Y., Abe Y., Hojo A., Kobayashi K., Maegaki Y., Ishikawa N., Ikeda H., Amamoto M., Mizuguchi T., Iwama K., Itai T., Miyatake S., Saitsu H., Matsumoto N., Kato M.	Epilepsia Open	5
25156649	Clinical and genetic features of acute encephalopathy in children taking theophylline	Article	2015	Saitoh M., Shinohara M., Ishii A., Ihara Y., Hirose S., Shiomi M., Kawawaki H., Kubota M., Yamagata T., Miyamoto A., Yamanaka G., Amemiya K., Kikuchi K., Kamei A., Akasaka M., Anzai Y., Mizuguchi M.	Brain and Development	37
29948376	Clinical and genetic study of Tunisian families with genetic generalized epilepsy: contribution of CACNA1H and MAST4 genes	Article	2018	Landoulsi Z., Laatar F., Noé E., Mrabet S., Ben Djebara M., Achaz G., Nava C., Baulac S., Kacem I., Gargouri-Berrechid A., Gouider R., Leguern E.	Neurogenetics	19
31487502	Clinical Application of Targeted Next-Generation Sequencing Panels and Whole Exome Sequencing in Childhood Epilepsy	Article	2019	Costain G., Cordeiro D., Matviychuk D., Mercimek-Andrews S.	Neuroscience	418
32005694	Clinical exome sequencing as the first-tier test for diagnosing developmental disorders covering both CNV and SNV: A Chinese cohort	Article	2020	Dong X., Liu B., Yang L., Wang H., Wu B., Liu R., Chen H., Chen X., Yu S., Chen B., Wang S., Xu X., Zhou W., Lu Y.	Journal of Medical Genetics	57
	Clinical phenotype, gene mutation and application of targeted next generation sequencing in patients with early-onset epileptic encephalopathy	Article	2018	Liu X.-J., Zhang P.-Y., Lei M.-F., Wei X.-P., Yu X.-L., Li D., Shu J.-B., Cai C.-Q., Zhang Y.-Q.	Chinese Journal of Contemporary Neurology and Neurosurgery	18
30737342	Clinical spectrum of STX1B -related epileptic disorders	Article	2019	Wolking S., May P., Mei D., Møller R.S., Balestrini S., Helbig K.L., Altuzarra C.D., Chatron N., Kaiwar C., Stöhr K., Widdess-Walsh P., Mendelsohn B.A., Numis A., Cilio M.R., Van Paesschen W., Svendsen L.L., Oates S., Hughes E., Goyal S., Brown K., Sifuentes Saenz M., Dorn T., Muhle H., Pagnamenta A.T., Vavoulis D.V., Knight S.J.L., Taylor J.C., Canevini M.P., Darra F., Gavrilova R.H., Powis Z., …	Neurology	92
31273778	Clinical utility of multigene panel testing in adults with epilepsy and intellectual disability	Article	2019	Borlot F., de Almeida B.I., Combe S.L., Andrade D.M., Filloux F.M., Myers K.A.	Epilepsia	60
31625159	Coadministered cannabidiol and clobazam: Preclinical evidence for both pharmacodynamic and pharmacokinetic interactions	Article	2019	Anderson L.L., Absalom N.L., Abelev S.V., Low I.K., Doohan P.T., Martin L.J., Chebib M., McGregor I.S., Arnold J.C.	Epilepsia	60
14978247	Combinatorial interaction of scorpion toxins Lqh-2, Lqh-3, and LqhalphaIT with sodium channel receptor sites-3	Article	2004	Mol Pharmacol	Mol Pharmacol	Mol Pharmacol	Leipold E
25344690	Common variants associated with general and MMR vaccine-related febrile seizures	Article	2014	Feenstra B., Pasternak B., Geller F., Carstensen L., Wang T., Huang F., Eitson J.L., Hollegaard M.V., Svanström H., Vestergaard M., Hougaard D.M., Schoggins J.W., Jan L.Y., Melbye M., Hviid A.	Nature Genetics	46
	Comparative study of joint bioinformatics analysis of underlying potential of 'neurimmiR', miR-212-3P/miR-132-3P, being involved in epilepsy and its emerging role in human cancer	Article	2017	Xia L., Li D., Lin C., Ou S., Li X., Pan S.	Oncotarget	8
28518218	Comparison and optimization of in silico algorithms for predicting the pathogenicity of sodium channel variants in epilepsy	Article	2017	Holland K.D., Bouley T.M., Horn P.S.	Epilepsia	58
24659627	Confirming an expanded spectrum of SCN2A mutations: A case series	Article	2014	Matalon D., Goldberg E., Medne L., Marsh E.D.	Epileptic Disorders	16
28621020	Conservation of alternative splicing in sodium channels reveals evolutionary focus on release from inactivation and structural insights into gating	Article	2017	Liavas A., Lignani G., Schorge S.	Journal of Physiology	595
	Conservation-based prediction of the transcription regulatory region of the SCN1A gene	Article	2009	Long Y.-S., Shi Y.-W., Liao W.-P.	Progress in Natural Science	19
28511630	Corpus Callosotomy for Intractable Epilepsy Revisited: The Children's Hospital of Michigan Series	Article	Journal of Child Neurology	32	32	32
33912281	Cou cou, flying fish and a whole exome please… lessons learned from genetic testing in barbados	Article	2021	Scantlebury M.H., Barrett K.T., Jacinto S., Corbin D.O.C., Kerr M., Khan A.	Pan African Medical Journal	38
23836888	CRMP2 protein SUMOylation modulates NaV1.7 channel trafficking	Article	2013	Dustrude E.T., Wilson S.M., Ju W., Xiao Y., Khanna R.	Journal of Biological Chemistry	288
19406745	Crystal structure of a fibroblast growth factor homologous factor (FHF) defines a conserved surface on FHFs for binding and modulation of voltage-gated sodium channels	Article	2009	J Biol Chem	J Biol Chem	J Biol Chem	Goetz R
28593511	De novo exonic duplication of ATP1A2 in Italian patient with hemiplegic migraine: a case report	Article	2017	Gagliardi S., Grieco G.S., Gualandi F., Caniatti L.M., Groppo E., Valente M., Giuseppe N., Neri M., Cereda C.	Journal of Headache and Pain	18
24207121	De novo loss-of-function mutations in CHD2 cause a fever-sensitive myoclonic epileptic encephalopathy sharing features with Dravet syndrome	Article	2013	Am J Hum Genet	Am J Hum Genet	Am J Hum Genet	Suls A
20837964	De novo mutations in ATP1A2 and CACNA1A are frequent in early-onset sporadic hemiplegic migraine	Article	2010	Riant F., Ducros A., Ploton C., Barbance C., Depienne C., Tournier-Lasserve E.	Neurology	75
	Deciphering in silico the Role of Mutated NaV1.1 Sodium Channels in Enhancing Trigeminal Nociception in Familial Hemiplegic Migraine Type 3	Article	2021	Suleimanova A., Talanov M., van den Maagdenberg A.M.J.M., Giniatullin R.	Frontiers in Cellular Neuroscience	15
20506560	Deletions of SCN1A 5′ genomic region with promoter activity in dravet syndrome	Article	2010	Nakayama T., Ogiwara I., Ito K., Kaneda M., Mazaki E., Osaka H., Ohtani H., Inoue Y., Fujiwara T., Uematsu M., Haginoya K., Tsuchiya S., Yamakawa K.	Human Mutation	31
16713920	De-novo mutations of the sodium channel gene SCN1A in alleged vaccine encephalopathy: a retrospective study	Article	2006	Berkovic S.F., Harkin L., McMahon J.M., Pelekanos J.T., Zuberi S.M., Wirrell E.C., Gill D.S., Iona X., Mulley J.C., Scheffer I.E.	Lancet Neurology	5
22784462	Detection of a novel mutation in the CACNA1A gene	Article	2012	Stuart S., Roy B., Davies G., Maksemous N., Smith R., Griffiths L.R.	Twin Research and Human Genetics	15
26484865	Determination of the optimal concentration of valproic acid in patients with epilepsy: A population pharmacokinetic-pharmacodynamic analysis	Article	2015	Nakashima H., Oniki K., Nishimura M., Ogusu N., Shimomasuda M., Ono T., Matsuda K., Yasui-Furukori N., Nakagawa K., Ishitsu T., Saruwatari J.	PLoS ONE	10
32613771	Determining the best candidates for next-generation sequencing-based gene panel for evaluation of early-onset epilepsy	Article	2020	Lee J., Lee C., Ki C.-S., Lee J.	Molecular Genetics and Genomic Medicine	8
32086284	Diagnostic exome sequencing in non-acquired focal epilepsies highlights a major role of GATOR1 complex genes	Article	2020	Krenn M., Wagner M., Hotzy C., Graf E., Weber S., Brunet T., Lorenz-Depiereux B., Kasprian G., Aull-Watschinger S., Pataraia E., Stogmann E., Zimprich A., Strom T.M., Meitinger T., Zimprich F.	Journal of Medical Genetics	57
27864847	Diagnostic Targeted Resequencing in 349 Patients with Drug-Resistant Pediatric Epilepsies Identifies Causative Mutations in 30 Different Genes	Article	2017	Parrini E., Marini C., Mei D., Galuppi A., Cellini E., Pucatti D., Chiti L., Rutigliano D., Bianchini C., Virdò S., De Vita D., Bigoni S., Barba C., Mari F., Montomoli M., Pisano T., Rosati A., Clinical Study Group, Guerrini R., Accorsi P., Ardissone A., Battaglia D., Bertani G., Borgarello G., Cesaroni E., Chiari S., Cordelli D.M., Doccini V., Donati I., Fontana E., Fusco C., Gentile M., Giordan…	Human Mutation	38
28832970	Differential binding of tetrodotoxin and its derivatives to voltage-sensitive sodium channel subtypes (Nav1.1 to Nav1.7)	Article	2017	Tsukamoto T., Chiba Y., Wakamori M., Yamada T., Tsunogae S., Cho Y., Sakakibara R., Imazu T., Tokoro S., Satake Y., Adachi M., Nishikawa T., Yotsu-Yamashita M., Konoki K.	British Journal of Pharmacology	174
20924084	Differential evolution of voltage-gated sodium channels in tetrapods and teleost fishes	Article	2011	Widmark J., Sundström G., Ocampo Daza D., Larhammar D.	Molecular Biology and Evolution	28
20807223	Disruption of the SCN2A and SCN3A genes in a patient with mental retardation, neurobehavioral and psychiatric abnormalities, and a history of infantile seizures	Article	Clinical Genetics	80	80	80
31653223	Dissecting the genetic basis of comorbid epilepsy phenotypes in neurodevelopmental disorders	Article	2019	Chow J., Jensen M., Amini H., Hormozdiari F., Penn O., Shifman S., Girirajan S., Hormozdiari F.	Genome Medicine	11
31401500	Dissecting the phenotypic and genetic spectrum of early childhood-onset generalized epilepsies	Article	Seizure	71	71	71
23182416	Do mutations in SCN1B cause Dravet syndrome?	Article	2013	Kim Y.O., Dibbens L., Marini C., Suls A., Chemaly N., Mei D., McMahon J.M., Iona X., Berkovic S.F., De Jonghe P., Guerrini R., Nabbout R., Scheffer I.E.	Epilepsy Research	103
29115566	Downregulation of microRNA-155 by preoperative administration of valproic acid prevents postoperative seizures by upregulating SCN1A	Article	2018	Zhang Z., Wang Z., Zhang B., Liu Y.	Molecular Medicine Reports	17
20187876	Dravet syndrome and 'immunization encephalopathy'	Case Reports	2010	Dev Med Child Neurol	Dev Med Child Neurol	Dev Med Child Neurol	Neville B
28732259	Dravet syndrome: Characteristics, comorbidities, and caregiver concerns	Article	2017	Villas N., Meskis M.A., Goodliffe S.	Epilepsy and Behavior	74
34095830	Dravet syndrome-associated mutations in GABRA1, GABRB2 and GABRG2 define the genetic landscape of defects of GABA(A) receptors	Article	2021	Brain Commun	Brain Commun	Brain Commun	Hernandez CC
21115970	Drosophila as a model for epilepsy: bss is a gain-of-function mutation in the para sodium channel gene that leads to seizures	Article	2011	Parker L., Padilla M., Du Y., Dong K., Tanouye M.A.	Genetics	187
27246997	Dynamic changes of depolarizing GABA in a computational model of epileptogenic brain: Insight for Dravet syndrome	Article	2016	Kurbatova P., Wendling F., Kaminska A., Rosati A., Nabbout R., Guerrini R., Dulac O., Pons G., Cornu C., Nony P., Chiron C., Benquet P., Aarons L., Alberti C., Bajard A., Bertrand Y., Bretz F., Caudri D., Castellan C., Chabaud S., Dufour F., Eymard N., Fisch R., Jullien V., Kassai B., Malik S., Ogungbenro K., Pérol D., Tiddens H.	Experimental Neurology	283
32597768	Early-onset epileptic encephalopathy with migrating focal seizures associated with a FARS2 homozygous nonsense variant	Article	2020	Ville D., Lesca G., Labalme A., Portes V.D., Arzimanoglou A., de Bellescize J.	Epileptic Disorders	22
33798941	Effects of antiepileptic drugs’ administration during pregnancy on the nerve cell proliferation and axonal outgrowth of human neuroblastoma SH-SY5Y nerve cells	Article	2021	Kakumoto M., Shimokawa K., Ueshima S., Hira D., Okano T.	Biochemical and Biophysical Research Communications	554
24125961	Effects of EPHX1, SCN1A and CYP3A4 genetic polymorphisms on plasma carbamazepine concentrations and pharmacoresistance in Chinese patients with epilepsy	Article	2013	Yun W., Zhang F., Hu C., Luo X., Xue P., Wang J., Ge Y., Meng H., Guo Y.	Epilepsy Research	107
24357141	Effects of normal aging and SCN1A risk-gene expression on brain metabolites: Evidence for an association between SCN1A and myo-inositol	Article	2014	Tunc-Skarka N., Meier S., Demirakca T., Sack M., Weber-Fahr W., Brusniak W., Wolf I., Matthäus F., Schulze T.G., Diener C., Ende G.	NMR in Biomedicine	27
22966884	Effects of polymorphisms in six candidate genes on phenytoin maintenance therapy in Han Chinese patients	Article	2012	Hung C.-C., Huang H.-C., Gao Y.-H., Chang W.-L., Ho J.-L., Chiou M.-H., Hsieh Y.-W., Liou H.-H.	Pharmacogenomics	13
29390993	Efficient strategy for the molecular diagnosis of intractable early-onset epilepsy using targeted gene sequencing	Article	2018	Rim J.H., Kim S.H., Hwang I.S., Kwon S.S., Kim J., Kim H.W., Cho M.J., Ko A., Youn S.E., Kim J., Lee Y.M., Chung H.J., Lee J.S., Kim H.D., Choi J.R., Lee S.-T., Kang H.-C.	BMC medical genomics	11
32880473	Electroclinical Phenotype-Genotype Homogeneity in Drug-Resistant “Generalized” Tonic-Clonic Seizures of Early Childhood	Article	2021	Jukkarwala A., Menon R.N., Sunesh E.R., Radhakrishnan A.	Clinical EEG and Neuroscience	52
27066544	Epilepsy with auditory features: A heterogeneous clinico-molecular disease	Article	2015	Neurol Genet	Neurol Genet	Neurol Genet	Pippucci T
25225143	Etiologies for seizures around the time of vaccination	Article	2014	Verbeek N.E., Jansen F.E., De Bondt P.E.V., De Kovel C.G., Van Kempen M.J.A., Lindhout D., Knoers N.V.A.M., Van Der Maas N.A.T., Brilstra E.H.	Pediatrics	134
18367426	Evaluation of susceptibility loci in an extended pedigree with idiopathic generalized epilepsy	Article	2008	Epileptic Disord	Epileptic Disord	Epileptic Disord	Klein KM
33998858	Evaluation of the Possible Anticonvulsant Effect of Δ(9)-Tetrahydrocannabinolic Acid in Murine Seizure Models	Article	2020	Cannabis Cannabinoid Res	Cannabis Cannabinoid Res	Cannabis Cannabinoid Res	Benson MJ
30182801	Evolution of Brain Glucose Metabolic Abnormalities in Children With Epilepsy and SCN1A Gene Variants	Article	2018	Kumar A., Juhász C., Luat A., Govil-Dalela T., Behen M.E., Hicks M.A., Chugani H.T.	Journal of Child Neurology	33
	ExACtly zero or once	Article	2017	Bennett C.A., Petrovski S., Oliver K.L., Berkovic S.F.	Neurology: Genetics	3
30868116	Exome sequencing identifies molecular diagnosis in children with drug-resistant epilepsy	Article	2018	Epilepsia Open	Epilepsia Open	Epilepsia Open	Tsang MH
20372843	Expression of voltage-gated sodium channel alpha subunit in human ovarian cancer	Article	2010	Oncol Rep	Oncol Rep	Oncol Rep	Gao R
32549268	Familial Hemiplegic Migraine with an ATP1A4 Mutation: Clinical Spectrum and Carbamazepine Efficacy	Article	2020	Brain Sci	Brain Sci	Brain Sci	Coppola G
27818813	Familial Hemiplegic Migraine with Severe Attacks: A New Report with ATP1A2 Mutation	Article	2016	Case Rep Neurol Med	Case Rep Neurol Med	Case Rep Neurol Med	Martínez E
20384724	Familial neonatal seizures with intellectual disability caused by a microduplication of chromosome 2q24.3	Article	2010	Heron S.E., Scheffer I.E., Grinton B.E., Eyre H., Oliver K.L., Bain S., Berkovic S.F., Mulley J.C.	Epilepsia	51
26362388	Familial temporal lobe epilepsy due to focal cortical dysplasia type IIIa	Article	2015	Fabera P., Krijtova H., Tomasek M., Krysl D., Zamecnik J., Mohapl M., Jiruska P., Marusic P.	Seizure	31
22014581	Fever as a seizure precipitant factor in Panayiotopoulos syndrome: A clinical and genetic study	Article	2012	Cordelli D.M., Aldrovandi A., Gentile V., Garone C., Conti S., Aceti A., Gennaro E., Zara F., Franzoni E.	Seizure	21
23891806	FGF14 localization and organization of the axon initial segment	Article	2013	Xiao M., Bosch M.K., Nerbonne J.M., Ornitz D.M.	Molecular and Cellular Neuroscience	56
27830185	FHF1 (FGF12) epileptic encephalopathy	Article	2016	Neurol Genet	Neurol Genet	Neurol Genet	Al-Mehmadi S
31439621	Fragile Females: Case Series of Epilepsy in Girls With FMR1 Disruption	Article	2019	Pediatrics	Pediatrics	Pediatrics	Myers KA
27816501	GAPDH-mediated posttranscriptional regulations of sodium channel Scn1a and Scn3a genes under seizure and ketogenic diet conditions	Article	2017	Lin G.-W., Lu P., Zeng T., Tang H.-L., Chen Y.-H., Liu S.-J., Gao M.-M., Zhao Q.-H., Yi Y.-H., Long Y.-S.	Neuropharmacology	113
34181986	Gastrointestinal Symptoms and Channelopathy-Associated Epilepsy	Article	2021	Beck V.C., Isom L.L., Berg A.T.	Journal of Pediatrics	237
18175077	GEFS+ is not related to the most common mutations of SCN1B, SCN1A and GABRG2 in two Tunisian families	Article	2007	Mrabet H., Belhedi N., Bouchlaka S., Gaaied A., Mrabet A.	Neurological Sciences	28
23752739	Gender-specific profiling in SCN1A polymorphisms and time-to-recurrence in patients with stage II/III colorectal cancer treated with adjuvant 5-fluoruracil chemotherapy	Article	2014	Benhaim L., Gerger A., Bohanes P., Paez D., Wakatsuki T., Yang D., Labonte M.J., Ning Y., El-Khoueiry R., Loupakis F., Zhang W., Laurent-Puig P., Lenz H.J.	Pharmacogenomics Journal	14
30776697	Gene mutational analysis in a cohort of Chinese children with unexplained epilepsy: Identification of a new KCND3 phenotype and novel genes causing Dravet syndrome	Article	2019	Wang J., Wen Y., Zhang Q., Yu S., Chen Y., Wu X., Zhang Y., Bao X.	Seizure	66
15861558	Gene variants affect response to antiepileptic drugs	Article	2005	Lancet Neurol	Lancet Neurol	Lancet Neurol	Senior K
18644040	Genetic analysis of 27 Spanish patients with hemiplegic migraine, basilar-type migraine and childhood periodic syndromes	Article	2008	Cuenca-León E., Corominas R., Fernàndez-Castillo N., Volpini V., Del Toro M., Roig M., MacAya A., Cormand B.	Cephalalgia	28
20064729	Genetic factors associated with drug-resistance of epilepsy: Relevance of stratification by patient age and aetiology of epilepsy	Article	2010	Sánchez M.B., Herranz J.L., Leno C., Arteaga R., Oterino A., Valdizán E.M., Nicolás J.M., Adín J., Armijo J.A.	Seizure	19
16245025	Genetic modifiers affecting severity of epilepsy caused by mutation of sodium channel Scn2a	Article	Mammalian Genome	16	16	16
15805193	Genetic predictors of the maximum doses patients receive during clinical use of the anti-epileptic drugs carbamazepine and phenytoin	Article	2005	Tate S.K., Depondt C., Sisodiya S.M., Cavalleri G.L., Schorge S., Soranzo N., Thom M., Sen A., Shorvon S.D., Sander J.W., Wood N.W., Goldstein D.B.	Proceedings of the National Academy of Sciences of the United States of America	102
20602612	Genetic profile of patients with epilepsy on first-line antiepileptic drugs and potential directions for personalized treatment	Article	2010	Grover S., Gourie-Devi M., Baghel R., Sharma S., Bala K., Gupta M., Narayanasamy K., Varma B., Gupta M., Kaur K., Talwar P., Kaur H., Giddaluru S., Sharma A., Brahmachari S.K., Consortium I.G.V., Kukreti R.	Pharmacogenomics	11
20675100	Genetic seizure susceptibility underlying acute encephalopathies in childhood	Article	2010	Kobayashi K., Ouchida M., Okumura A., Maegaki Y., Nishiyama I., Matsui H., Ohtsuka Y., Ohmori I.	Epilepsy Research	91
20100225	Genetic testing in the epilepsies - Report of the ILAE Genetics Commission	Article	Epilepsia	51	51	51
21881118	Genetic variants and susceptibility to neurological complications following West Nile virus infection	Article	2011	Loeb M., Eskandarian S., Rupp M., Fishman N., Gasink L., Patterson J., Bramson J., Hudson T.J., Lemire M.	Journal of Infectious Diseases	204
24275226	Genetic variants associated with development of TMD and its intermediate phenotypes: The genetic architecture of TMD in the OPPERA prospective cohort study	Article	2013	Smith S.B., Mir E., Bair E., Slade G.D., Dubner R., Fillingim R.B., Greenspan J.D., Ohrbach R., Knott C., Weir B., Maixner W., Diatchenko L.	Journal of Pain	14
29062094	Genetic Variants Associated with Episodic Ataxia in Korea	Article	2017	Choi K.-D., Kim J.-S., Kim H.-J., Jung I., Jeong S.-H., Lee S.-H., Kim D.U., Kim S.-H., Choi S.Y., Shin J.-H., Kim D.-S., Park K.-P., Kim H.-S., Choi J.-H.	Scientific Reports	7
28074849	Genetic Variants Identified from Epilepsy of Unknown Etiology in Chinese Children by Targeted Exome Sequencing	Article	2017	Weng Y., Du X., Bin R., Yu S., Xia Z., Zheng G., Zhong J., Zhang Y., Jiang Y.-H., Wang Y.	Scientific Reports	7
19270815	Gene-to-gene interaction between sodium channel-related genes in determining the risk of antiepileptic drug resistance	Article	2009	Jang S.-Y., Kim M.-K., Lee K.-R., Park M.-S., Kim B.-C., Cho K.-H., Lee M.-C., Kim Y.-S.	Journal of Korean Medical Science	24
22949513	Genome-wide association analysis of genetic generalized epilepsies implicates susceptibility loci at 1q43, 2p16.1, 2q22.3 and 17q21.32	Article	2012	Steffens M., Leu C., Ruppert A., Zara F., Striano P., Robbiano A., Capovilla G., Tinuper P., Gambardella A., Bianchi A., La neve A., Crichiutti G., de kovel C.G., Trenité D.K.-N., de haan G., Lindhout D., Gaus V., Schmitz B., Janz D., Weber Y.G., Becker F., Lerche H., Steinhoff B.J., Kleefuß-Lie A.A., Kunz W.S., Surges R., Elger C.E., Muhle H., Von spiczak S., Ostertag P., Helbig I., Stephani U.,…	Human Molecular Genetics	21
34348663	Genome-wide CNV investigation suggests a role for cadherin, Wnt, and p53 pathways in primary open-angle glaucoma	Article	2021	Lo Faro V., ten Brink J.B., Snieder H., Jansonius N.M., Bergen A.A.	BMC Genomics	22
16273391	Genome-wide linkage of febrile seizures and epilepsy to the FEB4 locus at 5q14.3-q23.1 and no MASS1 mutation	Article	2006	Deprez L., Claes L.R.F., Claeys K.G., Audenaert D., Van Dyck T., Goossens D., Van Paesschen W., Del-Favero J., Van Broeckhoven C., De Jonghe P.	Human Genetics	118
27143072	Genotype and phenotype of female Dravet syndrome with PCDH19 mutations	Article	2016	Liu A.J., Zhang Y.H., Xu X.J., Yang X.L., Yang Z.X., Wu Y., Liu X.Y., Jiang Y.W., Wu X.R.	Zhonghua er ke za zhi = Chinese journal of pediatrics	54
33058759	Germline and Mosaic Variants in PRKACA and PRKACB Cause a Multiple Congenital Malformation Syndrome	Article	2020	Am J Hum Genet	Am J Hum Genet	Am J Hum Genet	Palencia-Campos A
31940483	GluN2A NMDA Receptor Enhancement Improves Brain Oscillations, Synchrony, and Cognitive Functions in Dravet Syndrome and Alzheimer's Disease Models	Article	2020	Hanson J.E., Ma K., Elstrott J., Weber M., Saillet S., Khan A.S., Simms J., Liu B., Kim T.A., Yu G.-Q., Chen Y., Wang T.-M., Jiang Z., Liederer B.M., Deshmukh G., Solanoy H., Chan C., Sellers B.D., Volgraf M., Schwarz J.B., Hackos D.H., Weimer R.M., Sheng M., Gill T.M., Scearce-Levie K., Palop J.J.	Cell Reports	30
33882967	Guidelines on the diagnosis, clinical assessments, treatment and management for CLN2 disease patients	Article	2021	Orphanet J Rare Dis	Orphanet J Rare Dis	Orphanet J Rare Dis	Mole SE
21768184	Head tremor related to CACNA1A mutations	Article	2011	Geerlings R.P., Koehler P.J., Haane D.Y., Stam A.H., De Vries B., Boon E.M., Haan J.	Cephalalgia	31
34649875	Hemiplegic Migraine Associated With PRRT2 Mutations: A Clinical and Genetic Study	Article	2021	Neurology	Neurology	Neurology	Riant F
30071822	Heterozygous deletion of SCN2A and SCN3A in a patient with autism spectrum disorder and Tourette syndrome: A case report	Article	2018	Nickel K., Tebartz van Elst L., Domschke K., Gläser B., Stock F., Endres D., Maier S., Riedel A.	BMC Psychiatry	18
28837158	High frequency of mosaic pathogenic variants in genes causing epilepsy-related neurodevelopmental disorders	Article	2018	Stosser M.B., Lindy A.S., Butler E., Retterer K., Piccirillo-Stosser C.M., Richard G., McKnight D.A.	Genetics in Medicine	20
31980564	Higher burden of rare frameshift indels in genes related to synaptic transmission separate familial hemiplegic migraine from common types of migraine	Article	2020	Rasmussen A.H., Olofsson I., Chalmer M.A., Olesen J., Hansen T.F.	Journal of Medical Genetics	57
28683073	High-throughput electrophysiological assays for voltage gated ion channels using SyncroPatch 768PE	Article	2017	Li T., Lu G., Chiang E.Y., Chernov-Rogan T., Grogan J.L., Chen J.	PLoS ONE	12
33901312	Homozygous SCN1B variants causing early infantile epileptic encephalopathy 52 affect voltage-gated sodium channel function	Article	2021	Scala M., Efthymiou S., Sultan T., De Waele J., Panciroli M., Salpietro V., Maroofian R., Striano P., Van Petegem F., Houlden H., Bosmans F.	Epilepsia	62
29096607	Hypotonia and intellectual disability without dysmorphic features in a patient with PIGN-related disease	Article	BMC Medical Genetics	18	18	18
	Ictal sinus pause and myoclonic seizure in a child	Article	2016	Kim H.R., Kim G.-H., Eun S.-H., Eun B.-L., Byeon J.H.	Korean Journal of Pediatrics	59
34161902	Identification and successful management of near-lethal ventricular tachycardia in 2q24 deletion-associated developmental and epileptic encephalopathy	Article	2021	Toth J., Waickman A., Jost J., Seltzer L., Vinocur J.M., Auerbach D.S.	Seizure	91
21634377	Identification of a potent, state-dependent inhibitor of Nav1.7 with oral efficacy in the formalin model of persistent pain	Article	2011	J Med Chem	J Med Chem	J Med Chem	Bregman H
23030542	Identification of novel genes involved in migraine.	Article	2012	Lafrenière R.G., Rouleau G.A.	Headache	52 Suppl 2
19372756	Impaired plasma membrane targeting or protein stability by certain ATP1A2 mutations identified in sporadic or familial hemiplegic migraine	Article	2009	Tavraz N.N., Dürr K.L., Koenderink J.B., Freilinger T., Bamberg E., Dichgans M., Friedrich T.	Channels	3
31302675	Incidence and phenotypes of childhood-onset genetic epilepsies: A prospective population-based national cohort	Article	2019	Symonds J.D., Zuberi S.M., Stewart K., McLellan A., O'Regan M., MacLeod S., Jollands A., Joss S., Kirkpatrick M., Brunklaus A., Pilz D.T., Shetty J., Dorris L., Abu-Arafeh I., Andrew J., Brink P., Callaghan M., Cruden J., Diver L.A., Findlay C., Gardiner S., Grattan R., Lang B., MacDonnell J., McKnight J., Morrison C.A., Nairn L., Slean M.M., Stephen E., Webb A., Vincent A., Wilson M.	Brain	142
21714116	Increased expression of sodium channel subunit Nav1.1 in the injured dorsal root ganglion after peripheral nerve injury	Article	2011	Anat Rec (Hoboken)	Anat Rec (Hoboken)	Anat Rec (Hoboken)	Wang W
19584134	Increased late sodium currents are related to transcription of neuronal isoforms in a pressure-overload model	Article	2009	Xi Y., Wu G., Yang L., Han K., Du Y., Wang T., Lei X., Bai X., Ma A.	European Journal of Heart Failure	11
21893419	Infantile epilepsy associated with mosaic 2q24 duplication including SCN2A and SCN3A	Article	2011	Vecchi M., Cassina M., Casarin A., Rigon C., Drigo P., De Palma L., Clementi M.	Seizure	20
31144463	Influence of common SCN1A promoter variants on the severity of SCN1A-related phenotypes	Article	2019	de Lange I.M., Weuring W., van ‘t Slot R., Gunning B., Sonsma A.C.M., McCormack M., de Kovel C., van Gemert L.J.J.M., Mulder F., van Kempen M.J.A., Knoers N.V.A.M., Brilstra E.H., Koeleman B.P.C.	Molecular Genetics and Genomic Medicine	7
	Influence of EPHX1 polymorphism and clinical factors on carbamazepine resistant epilepsy	Article	2012	Tuanthaisong K., Chinvarun Y., Tantisira M.H., Kijsanayotin P.	Thai Journal of Pharmaceutical Sciences	36
	Influence of the SCN1A IVS5N + 5 G>A polymorphism on therapy with carbamazepine for epilepsy	Article	2012	Sterjev Z., Kiteva G., Cvetkovska E., Petrov I., Kuzmanovski I., Ribarska T.J., Nestorovska K.A., Matevska N., Trajkovik-Jolevska S., Dimovski A.J., Suturkova L.J.	Balkan Journal of Medical Genetics	15
32709127	Inter-regulation of kv 4.3 and voltage-gated sodium channels underlies predisposition to cardiac and neuronal channelopathies	Article	2020	Clatot J., Neyroud N., Cox R., Souil C., Huang J., Guicheney P., Antzelevitch C.	International Journal of Molecular Sciences	21
24080482	Interstitial 2q24.3 deletion including SCN2A and SCN3A genes in a patient with autistic features, psychomotor delay, microcephaly and no history of seizures	Article	2013	Celle M.E., Cuoco C., Porta S., Gimelli G., Tassano E.	Gene	532
25926453	Intracellular FGF14 (iFGF14) is required for spontaneous and evoked firing in cerebellar Purkinje neurons and for motor coordination and balance	Article	2015	Bosch M.K., Carrasquillo Y., Ransdell J.L., Kanakamedala A., Ornitz D.M., Nerbonne J.M.	Journal of Neuroscience	35
24315024	Lack of pathogenic mutations in six patients with MMPSI	Article	2014	De Filippo M.R., Rizzo F., Marchese G., Giurato G., Nassa G., Ravo M., Tarallo R., Pironti E., Vecchi M., Crichiutti G., Capizzi G., Verrotti A., Weisz A., Coppola G.	Epilepsy Research	108
12027919	Lack of SCN1A mutations in familial febrile seizures	Article	2002	Malacarne M., Madia F., Gennaro E., Vacca D., Güney A.I., Buono S., Bernardina B.D., Gaggero R., Gobbi G., Lispi M.L., Malamaci D., Melideo G., Roccella M., Sferro C., Tiberti A., Vanadia F., Vigevano F., Viri F., Vitali M.R., Bricarelli F.D., Bianchi A., Zara F.	Epilepsia	43
28664031	Large-scale structural alteration of brain in epileptic children with SCN1A mutation	Article	2017	Lee Y.-J., Yum M.-S., Kim M.-J., Shim W.-H., Yoon H.M., Yoo I.H., Lee J., Lim B.C., Kim K.J., Ko T.-S.	NeuroImage: Clinical	15
	Late diagnoses of Dravet syndrome: How many individuals are we missing?	Article	2021	Silvennoinen K., Puvirajasinghe C., Hudgell K., Sidhu M.K., Martins Custodio H., Jones W.D., Balestrini S., Sisodiya S.M., Ambrose J.C., Arumugam P., Baple E.L., Bleda M., Boardman-Pretty F., Boissiere J.M., Boustred C.R., Caulfield M.J., Chan G.C., Craig C.E.H., Daugherty L.C., de Burca A., Devereau A., Elgar G., Foulger R.E., Fowler T., Furió-Tarí P., Hackett J.M., Halai D., Hamblin A., Henders…	Epilepsia Open
28328123	Lawsuit raises questions about variant interpretation and communication: Ambiguity of lab and clinician roles could be at issue if case proceeds	Article	2017	[无可用作者姓名]	American journal of medical genetics. Part A	173
21527392	Leber's hereditary optic neuropathy mutations associated with infantile-onset myoclonic epilepsy	Article	2011	Frye R.E.	Journal of Child Neurology	26
	Linking a genetic defect in migraine to spreading depression in a computational model	Article	2014	Dahlem M.A., Schumacher J., Hubel N.	PeerJ	2014
26647834	Loss of synaptic Zn2+ transporter function increases risk of febrile seizures	Article	2015	Sci Rep	Sci Rep	Sci Rep	Hildebrand MS
34002542	Loss-of-function variants in K(v) 11.1 cardiac channels as a biomarker for SUDEP	Article	2021	Ann Clin Transl Neurol	Ann Clin Transl Neurol	Ann Clin Transl Neurol	Soh MS
20133610	Mammalian Pumilio 2 regulates dendrite morphogenesis and synaptic function	Article	2010	Vessey J.P., Schoderboeck L., Gingl E., Luzi E., Riefler J., Di Leva F., Karra D., Thomas S., Kiebler M.A., Macchi P.	Proceedings of the National Academy of Sciences of the United States of America	107
31393404	Mapping the knowledge structure and trends of epilepsy genetics over the past decade: A co-word analysis based on medical subject headings terms	Article	2019	Gan J., Cai Q., Galer P., Ma D., Chen X., Huang J., Bao S., Luo R., Zhang Q.	Medicine (United States)	98
21940124	Maturation of EEG oscillations in children with sodium channel mutations	Article	2012	Holmes G.L., Bender A.C., Wu E.X., Scott R.C., Lenck-Santini P.P., Morse R.P.	Brain and Development	34
28433711	MDH2 is an RNA binding protein involved in downregulation of sodium channel Scn1a expression under seizure condition	Article	2017	Chen Y.-H., Liu S.-J., Gao M.-M., Zeng T., Lin G.-W., Tan N.-N., Tang H.-L., Lu P., Su T., Sun W.-W., Xie L.-C., Yi Y.-H., Long Y.-S.	Biochimica et Biophysica Acta - Molecular Basis of Disease	1863
20498617	Mechanisms underlying off-target effects of the cholesteryl ester transfer protein inhibitor torcetrapib involve L-type calcium channels	Article	2010	J Hypertens	J Hypertens	J Hypertens	Clerc RG
16865694	Microdeletions involving the SCN1A gene may be common in SCN1A-mutation-negative SMEI patients	Article	2006	Suls A., Claeys K.G., Goossens D., Harding B., Van Luijk R., Scheers S., Deprez L., Audenaert D., Van Dyck T., Beeckmans S., Smouts I., Ceulemans B., Lagae L., Buyse G., Barisic N., Misson J.-P., Wauters J., Del-Favero J., De Jonghe P., Claes L.R.F.	Human Mutation	27
16866717	Migrainous vertigo: Mutation analysis of the candidate genes CACNA1A, ATP1A2, SCN1A, and CACNB4	Article	2006	Von Brevern M., Ta N., Shankar A., Wiste A., Siegel A., Radtke A., Sander T., Escayg A.	Headache	46
	Migrating partial seizures of infancy: Expansion of the electroclinical, radiological and pathological disease spectrum	Article	2013	McTague A., Appleton R., Avula S., Cross J.H., King M.D., Jacques T.S., Bhate S., Cronin A., Curran A., Desurkar A., Farrell M.A., Hughes E., Jefferson R., Lascelles K., Livingston J., Meyer E., McLellan A., Poduri A., Scheffer I.E., Spinty S., Kurian M.A., Kneen R.	Brain	136
34365140	miRNAomics analysis reveals the promoting effects of cigarette smoke extract-treated Beas-2B-derived exosomes on macrophage polarization	Article	2021	Chen Z., Wu H., Shi R., Fan W., Zhang J., Su W., Wang Y., Li P.	Biochemical and Biophysical Research Communications	572
19783390	Missense mutation of the sodium channel gene SCN2A causes Dravet syndrome	Article	2009	Shi X., Yasumoto S., Nakagawa E., Fukasawa T., Uchiya S., Hirose S.	Brain and Development	31
18192366	Molecular and biophysical properties of voltage-gated Na+ channels in murine vas deferens	Article	2008	Zhu H.-L., Aishima M., Morinaga H., Wassall R.D., Shibata A., Iwasa K., Nomura M., Nagao M., Sueishi K., Cunnane T.C., Teramoto N.	Biophysical Journal	94
19607678	Molecular and functional characterization of voltage-gated sodium channels in human sperm	Article	2009	Reprod Biol Endocrinol	Reprod Biol Endocrinol	Reprod Biol Endocrinol	Pinto FM
12374766	Molecular and pathological effects of a modifier gene on deficiency of the sodium channel Scn8a (Na(v)1.6)	Article	2002	Hum Mol Genet	Hum Mol Genet	Hum Mol Genet	Kearney JA
29190809	Molecular diagnosis of patients with epilepsy and developmental delay using a customized panel of epilepsy genes	Article	2017	Ortega-Moreno L., Giráldez B.G., Soto-Insuga V., Pozo R.L.-D., Rodrigo-Moreno M., Alarcón-Morcillo C., Sánchez-Martín G., Díaz-Gómez E., Guerrero-López R., Serratosa J.M., Lorenzo G., García-Peñas J.J., Ruíz-Falcó M.L., Pérez-Jiménez M.A., Cantarín V., Gil-Nagel A., Toledano R., García-Pérez A., Verdú A., Carrascosa M.C., Vivanco R., Aznar G., Armstrong J., Martorell L., Fons C., García-Cazorla A…	PLoS ONE	12
20466935	Molecular identity of dendritic voltage-gated sodium channels	Article	2010	Science	Science	Science	Lorincz A
17119788	Mutation analysis of CACNA1A and ATP1A2 genes in Brazilian FHM families	Article	2006	Lopesi L.R., Peres M.F.P., Vanmolkot K.R.J., Tobo P.R., Zukerman E., Frants R.R., Van Den Maagdenberg A.M.J.M., Moreira-Filho C.A.	Arquivos de Neuro-Psiquiatria	64
18242854	Mutation of sodium channel SCN3A in a patient with cryptogenic pediatric partial epilepsy	Article	2008	Holland K.D., Kearney J.A., Glauser T.A., Buck G., Keddache M., Blankston J.R., Glaaser I.W., Kass R.S., Meisler M.H.	Neuroscience Letters	433
16168594	Mutational scanning of potassium, sodium and chloride ion channels in malignant migrating partial seizures in infancy	Article	2006	Coppola G., Veggiotti P., Del Giudice E.M., Bellini G., Longaretti F., Taglialatela M., Pascotto A.	Brain and Development	28
29466837	Mutations in SCN3A cause early infantile epileptic encephalopathy	Article	2018	Zaman T., Helbig I., Božović I.B., DeBrosse S.D., Bergqvist A.C., Wallis K., Medne L., Maver A., Peterlin B., Helbig K.L., Zhang X., Goldberg E.M.	Annals of Neurology	83
25362483	Mutations in STX1B, encoding a presynaptic protein, cause fever-associated epilepsy syndromes	Article	2014	Schubert J., Siekierska A., Langlois M., May P., Huneau C., Becker F., Muhle H., Suls A., Lemke J.R., De Kovel C.G.F., Thiele H., Konrad K., Kawalia A., Toliat M.R., Sander T., Rüschendorf F., Caliebe A., Nagel I., Kohl B., Kecskés A., Jacmin M., Hardies K., Weckhuysen S., Riesch E., Dorn T., Brilstra E.H., Baulac S., Møller R.S., Hjalgrim H., Koeleman B.P.C., Jurkat-Rott K., Lehman-Horn F., Roac…	Nature Genetics	46
	Mutation-specific pharmacology of the Long QT syndrome	Article	2006	Kass R.S., Moss A.J.	Handbook of Experimental Pharmacology	171
26232052	Myoclonus in childhood-onset neurogenetic disorders: The importance of early identification and treatment	Article	2015	Van Egmond M.E., Elting J.W.J., Kuiper A., Zutt R., Heineman K.R., Brouwer O.F., Sival D.A., Willemsen M.A., Tijssen M.A.J., De Koning T.J.	European Journal of Paediatric Neurology	19
22223655	Na V1.1 channels are critical for intercellular communication in the suprachiasmatic nucleus and for normal circadian rhythms	Article	2012	Han S., Yu F.H., Schwartz M.D., Linton J.D., Bosma M.M., Hurley J.B., Catterall W.A., De La Iglesia H.O.	Proceedings of the National Academy of Sciences of the United States of America	109
29875317	NaV1.1 inhibition can reduce visceral hypersensitivity	Article	2018	JCI Insight	JCI Insight	JCI Insight	Salvatierra J
28784306	Nav1.2 is expressed in caudal ganglionic eminence-derived disinhibitory interneurons: Mutually exclusive distributions of Nav1.1 and Nav1.2	Article	2017	Yamagata T., Ogiwara I., Mazaki E., Yanagawa Y., Yamakawa K.	Biochemical and Biophysical Research Communications	491
	Network Pharmacology-Based Approach to Investigate the Mechanisms of Mahai Capsules in the Treatment of Cardiovascular Diseases	Article	2020	Shi M., Li B., Yuan Q., Gan X., Ren X., Jiang S., Liu Z.	Evidence-based Complementary and Alternative Medicine	2020
22013243	Neurovascular changes in prolonged migraine aura in FHM with a novel ATP1A2 gene mutation	Article	2012	Iizuka T., Takahashi Y., Sato M., Yonekura J., Miyakawa S., Endo M., Hamada J., Kan S., Mochizuki H., Momose Y., Tsuji S., Sakai F.	Journal of Neurology, Neurosurgery and Psychiatry	83
18386309	New variants of Nav1.5/SCN5A encode Na+ channels in the brain	Article	2008	J Neurogenet	J Neurogenet	J Neurogenet	Wang J
27241786	Next-generation sequencing for diagnosis of Rare diseases in the neonatal intensive care unit	Article	2016	Daoud H., Luco S.M., Li R., Bareke E., Beaulieu C., Jarinova O., Carson N., Nikkel S.M., Graham G.E., Richer J., Armour C., Bulman D.E., Chakraborty P., Geraghty M., Lines M.A., Lacaze-Masmonteil T., Majewski J., Boycott K.M., Dyment D.A.	CMAJ	188
25445412	NMR-based urinalysis for rapid diagnosis of β-ureidopropionase deficiency in a patient with Dravet syndrome	Article	2015	Lam C.-W., Law C.-Y., Leung K.-F., Lai C.-K., Pak-lam Chen S., Chan B., Chan K.-Y., Yuen Y.-P., Mak C.M., Yan-wo Chan A.	Clinica Chimica Acta	440
33216760	No association between SCN9A and monogenic human epilepsy disorders	Article	2020	Fasham J., Leslie J.S., Harrison J.W., Deline J., Williams K.B., Kuhl A., Schwoerer J.S., Cross H.E., Crosby A.H., Baple E.L.	PLoS Genetics	16
12694927	No evidence of GABRG2 mutations in severe myoclonic epilepsy of infancy	Article	2003	Madia F., Gennaro E., Cecconi M., Buti D., Capovilla G., Dalla Bernardina B., Elia M., Ferrari A., Fontana E., Gaggero R., Giannotta M., Giordano L., Granata T., La Selva L., Lispi M.L., Santucci M., Vanadia F., Veggiotti P., Vigliano P., Viri M., Dagna Bricarelli F., Bianchi A., Zara F.	Epilepsy Research	53
31714027	Novel and de novo mutation of PCDH19 in Girls Clustering Epilepsy	Article	2019	Yang L., Liu J., Su Q., Li Y., Yang X., Xu L., Tong L., Li B.	Brain and Behavior	9
29588980	Novel bandlike signal abnormality suggestive of heterotopia in patient with a KCNQ1 frameshift mutation	Article	2017	Epilepsia Open	Epilepsia Open	Epilepsia Open	Sabharwal P
23988467	Novel de novo SCN2A mutation in a child with migrating focal seizures of infancy	Article	2013	Dhamija R., Wirrell E., Falcao G., Kirmani S., Wong-Kisiel L.C.	Pediatric Neurology	49
31586957	Novel missense mutation in the ATP1A2 gene associated with atypical sporapedic hemiplegic migraine	Article	2019	Rispoli M.G., Di Stefano V., Mantuano E., De Angelis M.V.	BMJ Case Reports	12
32062735	Novel mutation of SCN9A gene causing generalized epilepsy with febrile seizures plus in a Chinese family	Article	2020	Zhang T., Chen M., Zhu A., Zhang X., Fang T.	Neurological Sciences	41
	Novel recurrent mutation in ATP1A2 gene in a Portuguese family with familiar hemiplegic migraine type 2 [Nova mutação recorrente no gene ATP1A2 numa familia portuguesa com enxaqueca hemiplégica familiar tipo 2]	Article	2006	Castro M.-J., Barros J., Lemos C., Mendes A., Vanmolkot K., Frants R., Sequeiros J., Monteiro J.P., van den Maagdenberg A.	Sinapse	6
24157691	Novel SCN3A variants associated with focal epilepsy in children	Article	2014	Vanoye C.G., Gurnett C.A., Holland K.D., George A.L., Kearney J.A.	Neurobiology of Disease	62
15741513	novoSNP, a novel computational tool for sequence variation discovery	Article	2005	Weckx S., Del-Favero J., Rademakers R., Claes L., Cruts M., De Jonghe P., Van Broeckhoven C., De Rijk P.	Genome Research	15
28864458	Optimizing genomic medicine in epilepsy through a gene-customized approach to missense variant interpretation	Article	Genome Research	27	27	27
23182886	Oral mexiletine for lidocaine-responsive neonatal epilepsy	Article	2013	Nakazawa M., Okumura A., Niijima S., Yamashita S., Shimono K., Hirose S., Shimizu T.	Brain and Development	35
21708262	Ototrauma induces sodium channel plasticity in auditory afferent neurons	Article	2011	Mol Cell Neurosci	Mol Cell Neurosci	Mol Cell Neurosci	Fryatt AG
20813567	Panayiotopoulos syndrome: Probable genetic origin, but not in SCN1A	Article	2011	Martín Del Valle F., Díaz Negrillo A., Ares Mateos G., Sanz Santaeufemia F.J., Del Rosal Rabes T., González-Valcárcel Sánchez-Puelles F.J.	European Journal of Paediatric Neurology	15
24136861	Paralogue annotation identifies novel pathogenic variants in patients with brugada syndrome and catecholaminergic polymorphic ventricular tachycardia	Article	Journal of Medical Genetics	51	51	51
31077350	Parental mosaicism in epilepsies due to alleged de novo variants	Article	2019	Møller R.S., Liebmann N., Larsen L.H.G., Stiller M., Hentschel J., Kako N., Abdin D., Di Donato N., Pal D.K., Zacher P., Syrbe S., Dahl H.A., Lemke J.R.	Epilepsia	60
20550552	Partial epilepsy with antecedent febrile seizures and seizure aggravation by antiepileptic drugs: Associated with loss of function of Nav1.1	Article	2010	Liao W.-P., Shi Y.-W., Long Y.-S., Zeng Y., Li T., Yu M.-J., Su T., Deng P., Lei Z.-G., Xu S.-J., Deng W.-Y., Liu X.-R., Sun W.-W., Yi Y.-H., Xu Z.C., Duan S.	Epilepsia	51
27113213	Pathogenic copy number variants and SCN1A mutations in patients with intellectual disability and childhood-onset epilepsy	Article	2016	Fry A.E., Rees E., Thompson R., Mantripragada K., Blake P., Jones G., Morgan S., Jose S., Mugalaasi H., Archer H., McCann E., Clarke A., Taylor C., Davies S., Gibbon F., Te Water Naude J., Hartley L., Thomas G., White C., Natarajan J., Thomas R.H., Drew C., Chung S.-K., Rees M.I., Holmans P., Owen M.J., Kirov G., Pilz D.T., Kerr M.P.	BMC Medical Genetics	17
26900580	Pathogenic mechanism of recurrent mutations of SCN8A in epileptic encephalopathy	Article	2015	Ann Clin Transl Neurol	Ann Clin Transl Neurol	Ann Clin Transl Neurol	Wagnon JL
33399642	Pathogenic variant in the pcdh19 gene in a patient with epilepsy and cognitive disability [Variante patogénica en el gen pcdh19 en una paciente con epilepsia y discapacidad cognitiva]	Article	2020	Silva V.V., Venegas E.G., Gabriela Repetto Lisboa M., Ramos E.B., Badia P.L.	Revista Chilena de Pediatria	91
33287870	Pathogenic variants identified by whole-exome sequencing in 43 patients with epilepsy	Article	2020	Hum Genomics	Hum Genomics	Hum Genomics	Zhang L
1	Pathophysiological role of omega pore current in channelopathies	Article	2012	Jurkat-Rott K., Groome J., Lehmann-Horn F.	Frontiers in Pharmacology	2021-06-03
28690234	PCDH19 gene mutations lead to epilepsy with mental retardation limited to females in 2 cases and literature review	Article	2017	Yang L., Arafat A., Peng J., Chen C., Ma Y., Yin F.	Journal of Central South University (Medical Sciences)	42
22050978	PCDH19 mutation in Japanese females with epilepsy	Article	2012	Higurashi N., Shi X., Yasumoto S., Oguni H., Sakauchi M., Itomi K., Miyamoto A., Shiraishi H., Kato T., Makita Y., Hirose S.	Epilepsy Research	99
27371789	PCDH19-related epilepsy and Dravet Syndrome: Face-off between two early-onset epilepsies with fever sensitivity	Article	2016	Trivisano M., Pietrafusa N., Ciommo V.D., Cappelletti S., Palma L.D., Terracciano A., Bertini E., Vigevano F., Specchio N.	Epilepsy Research	125
28455388	PCDH19-related epilepsy: A rare but recognisable clinical syndrome in females	Article	2017	Lyons S., Marnane M., Reavey E., Williams N., Costello D.	Practical Neurology	17
23712037	PCDH19-related female-limited epilepsy: further details regarding early clinical features and therapeutic efficacy	Article	2013	Epilepsy Res	Epilepsy Res	Epilepsy Res	Higurashi N
22267240	PCDH19-related infantile epileptic encephalopathy: An unusual X-linked inheritance disorder	Article	2012	Depienne C., Leguern E.	Human Mutation	33
26161490	Pediatric seizures and Vaccines	Article	2015	Kerstenetzk L., Gidal B.	Journal of the American Pharmacists Association	55
18093146	Pertussis vaccination and epilepsy--an erratic history, new research and the mismatch between science and social policy	Article	2008	Epilepsia	Epilepsia	Epilepsia	Shorvon S
22884613	PGD for germline mosaicism	Article	2012	Altarescu G., Beeri R., Eldar-Geva T., Varshaver I., Margalioth E.J., Levy-Lahad E., Renbaum P.	Reproductive BioMedicine Online	25
	Pharmacogenomic association study on the role of drug metabolizing, drug transporters and drug target gene polymorphisms in drug-resistant epilepsy in a north Indian population	Article	2011	Kumari R., Lakhan R., Garg R., Kalita J., Misra U., Mittal B.	Indian Journal of Human Genetics	17
	Phenotypic spectrum and genomics of undiagnosed arthrogryposis multiplex congenita	Article	2021	Laquerriere A., Jaber D., Abiusi E., Maluenda J., Mejlachowicz D., Vivanti A., Dieterich K., Stoeva R., Quevarec L., Nolent F., Biancalana V., Latour P., Sternberg D., Capri Y., Verloes A., Bessieres B., Loeuillet L., Attie-Bitach T., Martinovic J., Blesson S., Petit F., Beneteau C., Whalen S., Marguet F., Bouligand J., Héron D., Viot G., Amiel J., Amram D., Bellesme C., Bucourt M., Faivre L., Jo…	Journal of Medical Genetics
20728059	Phenytoin-induced visual disturbances mimicking Delirium Tremens in a child	Case Reports	2010	Eur J Paediatr Neurol	Eur J Paediatr Neurol	Eur J Paediatr Neurol	Marín LL
26555147	Polymorphic variants of SCN1A and EPHX1 influence plasma carbamazepine concentration, metabolism and pharmacoresistance in a population of kosovar albanian epileptic patients	Article	2015	Daci A., Beretta G., Vllasaliu D., Shala A., Govori V., Norata G.D., Krasniqi S.	PLoS ONE	10
21713554	Polymorphisms of the SCN1A gene in children and adolescents with primary headache and idiopathic or cryptogenic epilepsy: Is there a linkage?	Article	2011	Toldo I., Bruson A., Casarin A., Salviati L., Boniver C., Sartori S., Montagna P., Battistella P.A., Clementi M.	Journal of Headache and Pain	12
32457604	Possible Genetic Determinants of Response to Phenytoin in a Group of Colombian Patients With Epilepsy	Article	2020	Front Pharmacol	Front Pharmacol	Front Pharmacol	Calderon-Ospina CA
	Possible precision medicine implications from genetic testing using combined detection of sequence and intragenic copy number variants in a large cohort with childhood epilepsy	Article	2019	Truty R., Patil N., Sankar R., Sullivan J., Millichap J., Carvill G., Entezam A., Esplin E.D., Fuller A., Hogue M., Johnson B., Khouzam A., Kobayashi Y., Lewis R., Nykamp K., Riethmaier D., Westbrook J., Zeman M., Nussbaum R.L., Aradhya S.	Epilepsia Open	4
29144225	Prevalence of Genetic Disorders and GLUT1 Deficiency in a Ketogenic Diet Clinic	Article	2018	Hewson S., Brunga L., Ojeda M.F., Imhof E., Patel J., Zak M., Donner E.J., Kobayashi J., Salomons G.S., Mercimek-Andrews S.	Canadian Journal of Neurological Sciences	45
31570297	Priorities for Newborn Screening of Genetic Epilepsy	Article	Pediatric Neurology	101	101	101
20487671	Pyrethroid pediculicide resistance of head lice in Canada evaluated by serial invasive signal amplification reaction	Article	2010	Marcoux D., Palma K.G., Kaul N., Hodgdon H., Van Geest A., Previte D.J., Abou-Elghar G.E., Yoon K.S., Clark J.M.	Journal of Cutaneous Medicine and Surgery	14
26369628	Quinidine in the treatment of KCNT1-positive epilepsies	Case Reports	2015	Ann Neurol	Ann Neurol	Ann Neurol	Mikati MA
25800813	Ranking adverse drug reactions with crowdsourcing	Article	2015	Gottlieb A., Hoehndorf R., Dumontier M., Altman R.B.	Journal of Medical Internet Research	17
27955713	Rare and common epilepsies converge on a shared gene regulatory network providing opportunities for novel antiepileptic drug discovery	Article	2016	Delahaye-Duriez A., Srivastava P., Shkura K., Langley S.R., Laaniste L., Moreno-Moral A., Danis B., Mazzuferi M., Foerch P., Gazina E.V., Richards K., Petrou S., Kaminski R.M., Petretto E., Johnson M.R.	Genome Biology	17
28199897	Real-world utility of whole exome sequencing with targeted gene analysis for focal epilepsy	Article	2017	Perucca P., Scheffer I.E., Harvey A.S., James P.A., Lunke S., Thorne N., Gaff C., Regan B.M., Damiano J.A., Hildebrand M.S., Berkovic S.F., O'Brien T.J., Kwan P.	Epilepsy Research	131
27226003	Recurrent coma and fever in familial hemiplegic migraine type 2. A prospective 15-year follow-up of a large family with a novel ATP1A2 mutation	Article	Cephalalgia	37	37	37
34612084	Relevance of NR1I2 variants on carbamazepine therapy in Mexican Mestizos with epilepsy at a tertiary-care hospital	Article	2021	Pharmacogenomics	Pharmacogenomics	Pharmacogenomics	Fricke-Galindo I
25576396	Rescuable folding defective NaV1.1 (SCN1A) mutants in epilepsy: Properties, occurrence, and novel rescuing strategy with peptides targeted to the endoplasmic reticulum	Article	2015	Bechi G., Rusconi R., Cestèle S., Striano P., Franceschetti S., Mantegazza M.	Neurobiology of Disease	75
11729869	Respiratory rhythm generation: preB?tzinger neuron discharge patterns and persistent sodium current	Article	2001	Adv Exp Med Biol	Adv Exp Med Biol	Adv Exp Med Biol	McCrimmon DR
	Risk analysis of vaccination in children with genetic epilepsy combined with febrile seizures plus [遗传性癫痫伴热性惊厥附加症患儿的疫苗接种风险分析]	Article	2020	Shao X., Hu J., Yao Y., Yu D., Yuan Z.	Chinese Journal of Neuromedicine	19
24704313	Role of the hippocampus in Nav1.6 (Scn8a) mediated seizure resistance	Article	2014	Makinson C.D., Tanaka B.S., Lamar T., Goldin A.L., Escayg A.	Neurobiology of Disease	68
23895530	Role of the sodium channel SCN9A in genetic epilepsy with febrile seizures plus and Dravet syndrome	Article	2013	Mulley J.C., Hodgson B., McMahon J.M., Iona X., Bellows S., Mullen S.A., Farrell K., Mackay M., Sadleir L., Bleasel A., Gill D., Webster R., Wirrell E.C., Harbord M., Sisodiya S., Andermann E., Kivity S., Berkovic S.F., Scheffer I.E., Dibbens L.M.	Epilepsia	54
25668517	RORA gene rs12912233 and rs880626 polymorphisms and their interaction with SCN1A rs3812718 in the risk of epilepsy: A case-control study in Malaysia	Article	2015	Haerian B.S., Sha'ari H.M., Tan H.J., Fong C.Y., Wong S.W., Ong L.C., Raymond A.A., Tan C.T., Mohamed Z.	Genomics	105
31575436	Rufinamide efficacy and association with phenotype and genotype in children with intractable epilepsy: A retrospective single center study	Article	2020	Oesch G., Bozarth X.L.	Epilepsy Research	168
22534457	SCN1A affects brain structure and the neural activity of the aging brain	Article	2012	Meier S., Demirakca T., Brusniak W., Wolf I., Liebsch K., Tunc-Skarka N., Nieratschker V., Witt S.H., Matthäus F., Ende G., Flor H., Rietschel M., Diener C., Schulze T.G.	Biological Psychiatry	72
26877851	SCN1A and SCN1B gene polymorphisms and their association with plasma concentrations of carbamazepine and carbamazepine 10, 11 epoxide in Iranian epileptic patients	Article	2015	Iran J Basic Med Sci	Iran J Basic Med Sci	Iran J Basic Med Sci	Namazi S
27595042	SCN2A-Related Early-Onset Epileptic Encephalopathy Responsive to Phenobarbital	Article	2016	J Pediatr Epilepsy	J Pediatr Epilepsy	J Pediatr Epilepsy	Baumer FM
24498617	Screening of CACNA1A and ATP1A2 genes in hemiplegic migraine: clinical, genetic, and functional studies	Article	2013	Mol Genet Genomic Med	Mol Genet Genomic Med	Mol Genet Genomic Med	Carre?o O
33387902	Self-limited focal epilepsy and childhood apraxia of speech with WAC pathogenic variants	Article	2021	Eur J Paediatr Neurol	Eur J Paediatr Neurol	Eur J Paediatr Neurol	Alawadhi A
22140375	Severe Myoclonic Epilepsy in Infancy - Adult Phenotype with Bradykinesia, Hypomimia, and Perseverative Behavior: Report of Five Cases	Article	2010	Mol Syndromol	Mol Syndromol	Mol Syndromol	Martin P
34013884	Somatostatin-expressing parafacial neurons are CO(2)/H(+) sensitive and regulate baseline breathing	Article	2021	Elife	Elife	Elife	Cleary CM
30061856	The Efficacy of Ketogenic Diet for Specific Genetic Mutation in Developmental and Epileptic Encephalopathy	Article	2018	Front Neurol	Front Neurol	Front Neurol	Ko A
33410528	The phenotypic spectrum of X-linked, infantile onset ALG13-related developmental and epileptic encephalopathy	Article	2021	Epilepsia	Epilepsia	Epilepsia	Datta AN
28070485	Vagus nerve stimulation for genetic epilepsy with febrile seizures plus (GEFS(+)) accompanying seizures with impaired consciousness	Case Reports	2016	Epilepsy Behav Case Rep	Epilepsy Behav Case Rep	Epilepsy Behav Case Rep	Hanaya R
31755124	SCN1A Variants in vaccine-related febrile seizures: A prospective study	Article	2020	Damiano J.A., Deng L., Li W., Burgess R., Schneider A.L., Crawford N.W., Buttery J., Gold M., Richmond P., Macartney K.K., Hildebrand M.S., Scheffer I.E., Wood N., Berkovic S.F.	Annals of Neurology	87
24342961	SCN1A variations and response to multiple antiepileptic drugs	Article	2014	Yip T.S.C., O'Doherty C., Tan N.C.K., Dibbens L.M., Suppiah V.	Pharmacogenomics Journal	14
25823783	SCN1A, ABCC2 and UGT2B7 gene polymorphisms in association with individualized oxcarbazepine therapy	Article	2015	Ma C.-L., Wu X.-Y., Jiao Z., Hong Z., Wu Z.-Y., Zhong M.-K.	Pharmacogenomics	16
23466530	SCN1AIVS5-91G>A polymorphism is associated with susceptibility to epilepsy but not with drug responsiveness	Article	2013	Kumari R., Lakhan R., Kumar S., Garg R.K., Misra U.K., Kalita J., Mittal B.	Biochimie	95
28235671	SCN3A deficiency associated with increased seizure susceptibility	Article	2017	Lamar T., Vanoye C.G., Calhoun J., Wong J.C., Dutton S.B.B., Jorge B.S., Velinov M., Escayg A., Kearney J.A.	Neurobiology of Disease	102
27270488	SCN8A encephalopathy: Research progress and prospects	Article	2016	Meisler M.H., Helman G., Hammer M.F., Fureman B.E., Gaillard W.D., Goldin A.L., Hirose S., Ishii A., Kroner B.L., Lossin C., Mefford H.C., Parent J.M., Patel M., Schreiber J., Stewart R., Whittemore V., Wilcox K., Wagnon J.L., Pearl P.L., Vanderver A., Scheffer I.E.	Epilepsia	57
	Screening of CACNA1A and ATP1A2 genes in hemiplegic migraine: Clinical, genetic, and functional studies	Article	2013	Carreño O., Corominas R., Angèlica Serra S., Sintas C., Fernández-Castillo N., Vila-Pueyo M., Toma C., Gené G.G., Pons R., Llaneza M., Jesús Sobrido M., Grinberg D., Ángel Valverde M., Manuel Fernández-Fernández J., Macaya A., Cormand B.	Molecular Genetics and Genomic Medicine	1
12900796	Selection and evaluation of tagging SNPs in the neuronal-sodium-channel gene SCN1A: Implications for linkage-disequilibrium gene mapping	Article	2003	Weale M.E., Depondt C., Macdonald S.J., Smith A., Lai P.S., Shorvon S.D., Wood N.W., Goldstein D.B.	American Journal of Human Genetics	73
16464983	Severe epilepsy resulting from genetic interaction between Scn2a and Kcnq2	Article	2006	Kearney J.A., Yang Y., Beyer B., Bergren S.K., Claes L., DeJonghe P., Frankel W.N.	Human Molecular Genetics	15
15249644	Severe epilepsy, retardation, and dysmorphic features with a 2q deletion including SCN1A and SCN2A	Article	2004	Pereira S., Vieira J.P., Barroca F., Roll P., Carvalhas R., Cau P., Sequeira S., Genton P., Szepetowski P.	Neurology	63
32897040	Small-fibre pathology has no impact on somatosensory system function in patients with fibromyalgia	Article	2020	Fasolino A., Di Stefano G., Leone C., Galosi E., Gioia C., Lucchino B., Terracciano A., Di Franco M., Cruccu G., Truini A.	Pain	161
30146301	Sodium Channel SCN3A (NaV1.3) Regulation of Human Cerebral Cortical Folding and Oral Motor Development	Article	2018	Smith R.S., Kenny C.J., Ganesh V., Jang A., Borges-Monroy R., Partlow J.N., Hill R.S., Shin T., Chen A.Y., Doan R.N., Anttonen A.-K., Ignatius J., Medne L., Bönnemann C.G., Hecht J.L., Salonen O., Barkovich A.J., Poduri A., Wilke M., de Wit M.C.Y., Mancini G.M.S., Sztriha L., Im K., Amrom D., Andermann E., Paetau R., Lehesjoki A.-E., Walsh C.A., Lehtinen M.K.	Neuron	99
15917456	Sodium currents in medullary neurons isolated from the pre-B?tzinger complex region	Article	2005	J Neurosci	J Neurosci	J Neurosci	Ptak K
19214208	Sporadic infantile epileptic encephalopathy caused by mutations in PCDH19 resembles dravet syndrome but mainly affects females	Article	2009	Depienne C., Bouteiller D., Keren B., Cheuret E., Poirier K., Trouillard O., Benyahia B., Quelin C., Carpentier W., Julia S., Afenjar A., Gautier A., Rivier F., Meyer S., Berquin P., Hélias M., Py I., Rivera S., Bahi-Buisson N., Gourfinkel-An I., Cazeneuve C., Ruberg M., Brice A., Nabbout R., Leguern E.	PLoS Genetics	5
26917491	Molecular subtyping and improved treatment of neurodevelopmental disease	Article	Genome Medicine	8	8	8
24041236	Monozygotic twin sisters discordant for familial hemiplegic migraine.	Article	2013	Barros J., Barreto R., Brandão A.F., Domingos J., Damásio J., Ramos C., Lemos C., Sequeiros J., Alonso I., Pereira-Monteiro J.	The journal of headache and pain	14
29258970	Mowat-Wilson syndrome presenting with fever-associated seizures	Case Reports	Epileptic Disorders	19	19	19
21747585	Pharmacogenomic association study on the role of drug metabolizing, drug transporters and drug target gene polymorphisms in drug-resistant epilepsy in a north Indian population	Article	2011	Indian J Hum Genet	Indian J Hum Genet	Indian J Hum Genet	Kumari R
21444909	Protocadherin 19 mutations in girls with infantile-onset epilepsy	Article	2011	Neurology	Neurology	Neurology	Nabbout R
34033256	Seizures in Sotos syndrome: Phenotyping in 49 patients	Article	2021	Epilepsia Open	Epilepsia Open	Epilepsia Open	Fortin O
21236736	Similar but not identical: clinical implications for molecular studies in monozygotic discordant twins with epilepsy	Article	2011	Epilepsy Behav	Epilepsy Behav	Epilepsy Behav	Striano P
23662938	Targeted capture and sequencing for detection of mutations causing early onset epileptic encephalopathy	Article	2013	Kodera H., Kato M., Nord A.S., Walsh T., Lee M., Yamanaka G., Tohyama J., Nakamura K., Nakagawa E., Ikeda T., Ben-Zeev B., Lev D., Lerman-Sagie T., Straussberg R., Tanabe S., Ueda K., Amamoto M., Ohta S., Nonoda Y., Nishiyama K., Tsurusaki Y., Nakashima M., Miyake N., Hayasaka K., King M.-C., Matsumoto N., Saitsu H.	Epilepsia	54
31056551	Targeted gene sequencing in 6994 individuals with neurodevelopmental disorder with epilepsy	Article	2019	Heyne H.O., Artomov M., Battke F., Bianchini C., Smith D.R., Liebmann N., Tadigotla V., Stanley C.M., Lal D., Rehm H., Lerche H., Daly M.J., Helbig I., Biskup S., Weber Y.G., Lemke J.R.	Genetics in Medicine	21
29261713	Targeted next-generation sequencing provides novel clues for associated epilepsy and cardiac conduction disorder/SUDEP	Article	PLoS ONE	12	12	12
23708187	Targeted resequencing in epileptic encephalopathies identifies de novo mutations in CHD2 and SYNGAP1	Article	2013	Carvill G.L., Heavin S.B., Yendle S.C., McMahon J.M., O'Roak B.J., Cook J., Khan A., Dorschner M.O., Weaver M., Calvert S., Malone S., Wallace G., Stanley T., Bye A.M.E., Bleasel A., Howell K.B., Kivity S., Mackay M.T., Rodriguez-Casero V., Webster R., Korczyn A., Afawi Z., Zelnick N., Lerman-Sagie T., Lev D., Møller R.S., Gill D., Andrade D.M., Freeman J.L., Sadleir L.G., Shendure J., Berkovic S…	Nature Genetics	45
32380047	Tau: A Novel Entry Point for mTOR-Based Treatments in Autism Spectrum Disorder?	Article	Neuron	106	106	106
29929108	The adult motor phenotype of Dravet syndrome is associated with mutation of the STXBP1 gene and responds well to cannabidiol treatment	Article	2018	Álvarez Bravo G., Yusta Izquierdo A.	Seizure	60
27527380	The clinical spectrum of female epilepsy patients with PCDH19 mutations in a Chinese population	Article	2017	Liu A., Xu X., Yang X., Jiang Y., Yang Z., Liu X., Wu Y., Wu X., Wei L., Zhang Y.	Clinical Genetics	91
29486580	The contribution of CACNA1A, ATP1A2 and SCN1A mutations in hemiplegic migraine: A clinical and genetic study in Finnish migraine families	Article	2018	Hiekkala M.E., Vuola P., Artto V., Häppölä P., Häppölä E., Vepsäläinen S., Cuenca-León E., Lal D., Gormley P., Hämäläinen E., Ilmavirta M., Nissilä M., Säkö E., Sumelahti M.-L., Harno H., Havanka H., Keski-Säntti P., Färkkilä M., Palotie A., Wessman M., Kaunisto M.A., Kallela M.	Cephalalgia	38
21377452	The developmental changes of Nav1.1 and Nav1.2 expression in the human hippocampus and temporal lobe	Article	2011	Wang W., Takashima S., Segawa Y., Itoh M., Shi X., Hwang S.-K., Nabeshima K., Takeshita M., Hirose S.	Brain Research	1389
33049783	The Direct Costs of Dravet's Syndrome before and after Diagnosis Assessment	Article	2021	Česká K., Český L., Ošlejšková H., Aulická Š.	Neuropediatrics	52
30142967	The effect of Ca2+, lobe-specificity, and CaMKII on CaM binding to Nav1.1	Article	2018	Li J., Yu Z., Xu J., Feng R., Gao Q., Boczek T., Liu J., Li Z., Wang Q., Lei M., Gong J., Hu H., Minobe E., Ji H.-L., Kameyama M., Guo F.	International Journal of Molecular Sciences	19
21533730	The genetic features of 24 patients affected by familial and sporadic hemiplegic migraine	Article	2011	Gallanti A., Cardin V., Tonelli A., Bussone G., Bresolin N., Mariani C., Bassi M.T.	Neurological Sciences	32
17142831	The genetic spectrum of a population-based sample of familial hemiplegic migraine	Article	2007	Thomsen L.L., Kirchmann M., Bjornsson A., Stefansson H., Jensen R.M., Fasquel A.C., Petursson H., Stefansson M., Frigge M.L., Kong A., Gulcher J., Stefansson K., Olesen J.	Brain	130
27473590	The genetic variants in 3' untranslated region of voltage-gated sodium channel alpha 1 subunit gene affect the mRNA-microRNA interactions and associate with epilepsy	Article	2016	Li T., Kuang Y., Li B.	BMC Genetics	17
26354167	The ketogenic diet in infants - Advantages of early use	Article	2015	Dressler A., Trimmel-Schwahofer P., Reithofer E., Gröppel G., Mühlebner A., Samueli S., Grabner V., Abraham K., Benninger F., Feucht M.	Epilepsy Research	116
12742596	The lack of association between febrile convulsions and polymorphisms in SCN1A	Article	2003	Chou I.-C., Peng C.-T., Tsai F.-J., Huang C.-C., Shi Y.-R., Tsai C.-H.	Epilepsy Research	54
31256750	The lack of influence of IVS5-91 G>A polymorphism of the SCN1A gene on efficacy of lamotrigine in patients with focal epilepsy	Article	2019	Markovic I., Pejanovic-Skobic N., Bozina N., Susak Sporis I., Sporis D., Basic S.	Neurological Research	41
	The Nav channel bench series: Plasmid preparation	Article	2014	Feldman D.H., Lossin C.	MethodsX	1
30538486	The possible effect of SCN1A and SCN2A genetic variants on carbamazepine response among Khyber Pakhtunkhwa epileptic patients, Pakistan	Article	2018	Ther Clin Risk Manag	Ther Clin Risk Manag	Ther Clin Risk Manag	Nazish HR
27498208	The potential implication of SCN1A and CYP3A5 genetic variants on antiepileptic drug resistance among Egyptian epileptic children	Article	2016	Abo El Fotoh W.M.M., Abd el naby S.A.A., Habib M.S.E.-D., AL-refai A.A., Kasemy Z.A.	Seizure	41
23762276	The Relative Timing of Mutations in a Breast Cancer Genome	Article	PLoS ONE	8	8	8
25754450	The SCN1A Mutation Database: Updating Information and Analysis of the Relationships among Genotype, Functional Alteration, and Phenotype	Article	2015	Meng H., Xu H.-Q., Yu L., Lin G.-W., He N., Su T., Shi Y.-W., Li B., Wang J., Liu X.-R., Tang B., Long Y.-S., Yi Y.-H., Liao W.-P.	Human Mutation	36
19585586	The SCN1A variant database: A novel research and diagnostic tool	Article	2009	Claes L.R.F., Deprez L., Suls A., Baets J., Smets K., Van Dyck T., Deconinck T., Jordanova A., De Jonghe P.	Human Mutation	2021-10-30
	The structure of hereditary and congenital pathology in a multidisciplinary specialized pediatric clinic: Personalized approach to diagnostics	Article	2021	Kozhanova T.V., Zhilina S.S., Mescheryakova T.I., Lukash E.N., Markova S.I., Zavadenko N.N., Prityko A.G.	Pediatriya - Zhurnal im G.N. Speranskogo	100
28709814	The therapeutic implication of a novel SCN2A mutation associated early-onset epileptic encephalopathy with Rett-like features	Article	2017	Liang J.-S., Lin L.-J., Yang M.-T., Wang J.-S., Lu J.-F.	Brain and Development	39
17881658	The voltage-gated sodium channel Scn8a is a genetic modifier of severe myoclonic epilepsy of infancy	Article	2007	Martin M.S., Tang B., Papale L.A., Yu F.H., Catterall W.A., Escayg A.	Human Molecular Genetics	16
24436055	Transcription of the Human Sodium Channel SCN1A Gene Is Repressed by a Scaffolding Protein RACK1	Article	2014	Dong Z.-F., Tang L.-J., Deng G.-F., Zeng T., Liu S.-J., Wan R.-P., Liu T., Zhao Q.-H., Yi Y.-H., Liao W.-P., Long Y.-S.	Molecular Neurobiology	50
	Transcriptional dysregulation study reveals a core network involving the progression of Alzheimer's disease	Article	2019	Meng G., Mei H.	Frontiers in Aging Neuroscience	11
29069078	Transcriptomic correlates of neuron electrophysiological diversity	Article	2017	Tripathy S.J., Toker L., Li B., Crichlow C.-L., Tebaykin D., Mancarci B.O., Pavlidis P.	PLoS Computational Biology	13
24055687	True but not false memories are associated with the HTR2A gene	Article	2013	Zhu B., Chen C., Loftus E.F., Moyzis R.K., Dong Q., Lin C.	Neurobiology of Learning and Memory	106
32427350	Utility of genetic testing for therapeutic decision-making in adults with epilepsy	Article	2020	Johannesen K.M., Nikanorova N., Marjanovic D., Pavbro A., Larsen L.H.G., Rubboli G., Møller R.S.	Epilepsia	61
21087737	Vaccination and Dravet syndrome	Letter	The Lancet Neurology	9	9	9
24405698	Vaccination and occurrence of seizures in SCN1A mutation-positive patients: A multicenter Italian study	Article	2014	Zamponi N., Passamonti C., Petrelli C., Veggiotti P., Baldassari C., Verrotti A., Capovilla G., Viri M., Coppola G., Vignoli A.	Pediatric Neurology	50
32193085	Vaccination management in an asymptomatic child with a novel SCN1A variant and family history of status epilepticus following vaccination: A case report on a potential new direction in personalised medicine	Article	2020	Deng L., Ma A., Wood N., Ardern-Holmes S.	Seizure	78
29868823	Variability among next-generation sequencing panels for early-life epilepsies	Letter	JAMA Pediatrics	172	172	172
29500686	Variable epilepsy phenotypes associated with heterozygous mutation in the SCN9A gene: report of two cases	Article	2018	Yang C., Hua Y., Zhang W., Xu J., Xu L., Gao F., Jiang P.	Neurological Sciences	39
32845893	Variable patterns of mutation density among NaV1.1, NaV1.2 and NaV1.6 point to channel-specific functional differences associated with childhood epilepsy	Article	2020	Encinas A.C., Watkins J.C., Longoria I.A., Johnson J.P., Jr., Hammer M.F.	PLoS ONE	15
30817475	What is the role of cannabidiol in refractory epilepsy?	Article	2019	Lafleur K.M., Nemec E.C.	Journal of the American Academy of Physician Assistants	32
31720899	Whole exome sequencing identifies a novel SCN1A mutation in genetic (idiopathic) generalized epilepsy and juvenile myoclonic epilepsy subtypes	Article	2020	Chan C.-K., Low J.S.-Y., Lim K.-S., Low S.-K., Tan C.-T., Ng C.-C.	Neurological Sciences	41
29518120	Why west? Comparisons of clinical, genetic and molecular features of infants with and without spasms	Article	PLoS ONE	13	13	13
23023937	2q24 deletions: Further characterization of clinical findings and their relation to the SCN cluster	Article	American Journal of Medical Genetics, Part A	158 A	158 A	158 A
17001291	A common polymorphism in the SCN1A gene associates with phenytoin serum levels at maintenance dose	Article	2006	Tate S.K., Singh R., Hung C.-C., Tai J.J., Depondt C., Cavalleri G.L., Sisodiya S.M., Goldstein D.B., Liou H.-H.	Pharmacogenetics and Genomics	16
21561445	A functional polymorphism in the SCN1A gene does not influence antiepileptic drug responsiveness in Italian patients with focal epilepsy	Article	2011	Manna I., Gambardella A., Bianchi A., Striano P., Tozzi R., Aguglia U., Beccaria F., Benna P., Campostrini R., Canevini M.P., Condino F., Durisotti C., Elia M., Giallonardo A.T., Iudice A., Labate A., La Neve A., Michelucci R., Muscas G.C., Paravidino R., Zaccara G., Zucca C., Zara F., Perucca E.	Epilepsia	52
20038948	A genome-wide survey of human short-term memory	Article	2011	Papassotiropoulos A., Henke K., Stefanova E., Aerni A., Müller A., Demougin P., Vogler C., Sigmund J.C., Gschwind L., Huynh K.-D., Coluccia D., Mondadori C.R., Hänggi J., Buchmann A., Kostic V., Novakovic I., Van Den Bussche H., Kaduszkiewicz H., Weyerer S., Bickel H., Riedel-Heller S., Pentzek M., Wiese B., Dichgans M., Wagner M., Jessen F., Maier W., De Quervain D.J.-F.	Molecular Psychiatry	16
32773773	A longitudinal footprint of genetic epilepsies using automated electronic medical record interpretation	Article	2020	Ganesan S., Galer P.D., Helbig K.L., McKeown S.E., O’Brien M., Gonzalez A.K., Felmeister A.S., Khankhanian P., Ellis C.A., Helbig I.	Genetics in Medicine	22
33333793	A Wide Spectrum of Genetic Disorders Causing Severe Childhood Epilepsy in Taiwan: A Case Series of Ultrarare Genetic Cause and Novel Mutation Analysis in a Pilot Study	Article	2020	J Pers Med	J Pers Med	J Pers Med	Hong SY
28144265	Association of SCN1A gene polymorphism with antiepileptic drug responsiveness in the population of Thrace, Greece	Article	2017	Arch Med Sci	Arch Med Sci	Arch Med Sci	Angelopoulou C
23642572	Cognitive decline in Dravet syndrome: is there a cerebellar role?	Article	2013	Epilepsy Res	Epilepsy Res	Epilepsy Res	Battaglia D
33528079	Customized Targeted Massively Parallel Sequencing Enables More Precisely Diagnosis of Patients with Epilepsy	Article	2021	Intern Med J	Intern Med J	Intern Med J	Atli EI
34569149	Genomic analysis of "microphenotypes" in epilepsy	Article	2021	Am J Med Genet A	Am J Med Genet A	Am J Med Genet A	Stanley K
29760947	Incorporating epilepsy genetics into clinical practice: a 360°evaluation	Article	2018	NPJ Genom Med	NPJ Genom Med	NPJ Genom Med	Oates S
24052718	Influence of the SCN1A IVS5N + 5 G>A Polymorphism on Therapy with Carbamazepine for Epilepsy	Article	2012	Balkan J Med Genet	Balkan J Med Genet	Balkan J Med Genet	Sterjev Z
24860703	Linking a genetic defect in migraine to spreading depression in a computational model	Article	2014	PeerJ	PeerJ	PeerJ	Dahlem MA
22807908	Migraine-induced epistaxis and sporadic hemiplegic migraine: unusual features in the same patient	Article	2012	Case Rep Neurol	Case Rep Neurol	Case Rep Neurol	Barros J
	Genomic analysis of “microphenotypes” in epilepsy	Article	2021	Stanley K., Hostyk J., Tran L., Amengual-Gual M., Dugan P., Clark J., Choi H., Tchapyjnikov D., Perucca P., Fernandes C., Andrade D., Devinsky O., Cavalleri G.L., Depondt C., Sen A., O'Brien T., Heinzen E., Loddenkemper T., Goldstein D.B., Mikati M.A., Delanty N., Adcock J., Andrade D., Brazil C., Cavalleri G., Choi H., Costello D., Delanty N., Depondt C., Dugan P., Goldstein D., Heinzen E., Lewi…	American Journal of Medical Genetics, Part A
20041941	High-density SNP screen of sodium channel genes by haplotype tagging and DNA pooling for association with idiopathic generalized epilepsy	Article	2010	Makoff A., Lai T., Barratt C., Valentin A., Moran N., Asherson P., Nashef L.	Epilepsia	51
26993267	Improving diagnosis and broadening the phenotypes in early-onset seizure and severe developmental delay disorders through gene panel analysis	Article	2016	Trump N., McTague A., Brittain H., Papandreou A., Meyer E., Ngoh A., Palmer R., Morrogh D., Boustred C., Hurst J.A., Jenkins L., Kurian M.A., Scott R.H.	Journal of Medical Genetics	53
26438699	Incidence of dravet syndrome in a US population	Article	2015	Wu Y.W., Sullivan J., McDaniel S.S., Meisler M.H., Walsh E.M., Li S.X., Kuzniewicz M.W.	Pediatrics	136
33726816	Integration of whole genome sequencing into a healthcare setting: high diagnostic rates across multiple clinical entities in 3219 rare disease patients	Article	2021	Stranneheim H., Lagerstedt-Robinson K., Magnusson M., Kvarnung M., Nilsson D., Lesko N., Engvall M., Anderlid B.-M., Arnell H., Johansson C.B., Barbaro M., Björck E., Bruhn H., Eisfeldt J., Freyer C., Grigelioniene G., Gustavsson P., Hammarsjö A., Hellström-Pigg M., Iwarsson E., Jemt A., Laaksonen M., Enoksson S.L., Malmgren H., Naess K., Nordenskjöld M., Oscarson M., Pettersson M., Rasi C., Rose…	Genome Medicine	13
25690317	Investigating the genetic basis of fever-associated syndromic epilepsies using copy number variation analysis	Article	2015	Hartmann C., Von Spiczak S., Suls A., Weckhuysen S., Buyse G., Vilain C., Van Bogaert P., De Jonghe P., Cook J., Muhle H., Stephani U., Helbig I., Mefford H.C.	Epilepsia	56
	Ion channels: Genetics and as a targets for antiepileptic drugs	Article	2013	Yamakawa K.	Neurology Asia	18
19949041	Lack of replication of association between scn1a snp and febrile seizures	Article	2009	Petrovski S., Scheffer I.E., Sisodiya S.M., O'Brien T.J., Berkovic S.F., Catarino C.	Neurology	73
8062593	Localization of a putative human brain sodium channel gene (SCN1A) to chromosome band 2q24	Article	1994	Malo M.S., Blanchard B.J., Andresen J.M., Srivastava K., Chen X.-N., Li X., Wang Jabs E., Korenberg J.R., Ingram V.M.	Cytogenetic and Genome Research	67
30117335	Mesial Temporal Sclerosis in SCN1A-Related Epilepsy: Two Long-Term EEG Case Studies	Article	2019	Tiefes A.M., Hartlieb T., Tacke M., von Stülpnagel-Steinbeis C., Larsen L.H.G., Hao Q., Dahl H.A., Neubauer B.A., Gerstl L., Kudernatsch M., Kluger G.J., Borggraefe I.	Clinical EEG and Neuroscience	50
32032478	Modifier genes in SCN1A-related epilepsy syndromes	Article	2020	de Lange I.M., Mulder F., van 't Slot R., Sonsma A.C.M., van Kempen M.J.A., Nijman I.J., Ernst R.F., Knoers N.V.A.M., Brilstra E.H., Koeleman B.P.C.	Molecular Genetics and Genomic Medicine	8
21313790	Dravet syndrome: a technologist's perspective	Case Reports	2010	Am J Electroneurodiagnostic Technol	Am J Electroneurodiagnostic Technol	Am J Electroneurodiagnostic Technol	Lordeon PA
32853554	Semantic Similarity Analysis Reveals Robust Gene-Disease Relationships in Developmental and Epileptic Encephalopathies	Article	2020	Galer P.D., Ganesan S., Lewis-Smith D., McKeown S.E., Pendziwiat M., Helbig K.L., Ellis C.A., Rademacher A., Smith L., Poduri A., Seiffert S., von Spiczak S., Muhle H., van Baalen A., Thomas R.H., Krause R., Weber Y., Helbig I., NCEE Study Group, EPGP Investigators, EuroEPINOMICS-RES Consortium, Genomics Research and Innovation Network	American Journal of Human Genetics	107
	The efficacy of ketogenic diet for specific genetic mutation in developmental and epileptic encephalopathy	Article	2018	Ko A., Jung D.E., Kim S.H., Kang H.-C., Lee J.S., Lee S.T., Choi J.R., Kim H.D.	Frontiers in Neurology	9
20392657	Hepatic coma culminating in severe brain damage in a child with a SCN1A mutation	Article	2010	Nishri D., Blumkin L., Lev D., Leshinsky-Silver E., Abu-Rashid M., Birch R., Zuberi S.M., Lerman-Sagie T.	European Journal of Paediatric Neurology	14
32168371	A catalogue of new incidence estimates of monogenic neurodevelopmental disorders caused by de novo variants	Article	2020	López-Rivera J.A., Pérez-Palma E., Symonds J., Lindy A.S., McKnight D.A., Leu C., Zuberi S., Brunklaus A., Møller R.S., Lal D.	Brain	143
34395220	Genetic Diagnosis in Children with Epilepsy and Developmental Disorders by Targeted Gene Panel Analysis in a Developing Country	Article	2021	J Epilepsy Res	J Epilepsy Res	J Epilepsy Res	Rahman MM
31054517	De novo SCN1A, SCN8A, and CLCN2 mutations in childhood absence epilepsy	Article	2019	Xie H., Su W., Pei J., Zhang Y., Gao K., Li J., Ma X., Zhang Y., Wu X., Jiang Y.	Epilepsy Research	154
32336485	Genetic and clinical variations in a Norwegian sample diagnosed with Rett syndrome	Article	2020	Henriksen M.W., Breck H., Sejersted Y., Diseth T., von Tetzchner S., Paus B., Skjeldal O.H.	Brain and Development	42
26371886	Molecular profiling of a rare rosette-forming glioneuronal tumor arising in the spinal cord	Article	2015	Bidinotto L.T., Scapulatempo-Neto C., Mackay A., De Almeida G.C., Scheithauer B.W., Berardinelli G.N., Torrieri R., Clara C.A., Feltrin L.T., Viana-Pereira M., Varella-Garcia M., Jones C., Reis R.M.	PLoS ONE	10
27538648	Cytokine-related and sodium channel polymorphism as candidate predisposing factors for childhood encephalopathy FIRES/AERRPS	Article	2016	Saitoh M., Kobayashi K., Ohmori I., Tanaka Y., Tanaka K., Inoue T., Horino A., Ohmura K., Kumakura A., Takei Y., Hirabayashi S., Kajimoto M., Uchida T., Yamazaki S., Shiihara T., Kumagai T., Kasai M., Terashima H., Kubota M., Mizuguchi M.	Journal of the Neurological Sciences	368
23066759	Febrile infection-related epilepsy syndrome (FIRES) is not caused by SCN1A, POLG, PCDH19 mutations or rare copy number variations	Article（无关）	2012	Appenzeller S., Helbig I., Stephani U., Häusler M., Kluger G., Bungeroth M., Müller S., Kuhlenbäumer G., Van Baalen A.	Developmental Medicine and Child Neurology	54
22386634	Febrile infection-related epilepsy syndrome is not caused by SCN1A mutations	Article	2012	Carranza Rojo D., Simon Harvey A., Iona X., Dibbens L.M., Damiano J.A., Arsov T., Gill D., Freeman J.L., Leventer R.J., Vincent A., Berkovic S.F., McMahon J.M., Scheffer I.E.	Epilepsy Research	100
27029629	A targeted resequencing gene panel for focal epilepsy	Article	2016	Hildebrand M.S., Myers C.T., Carvill G.L., Regan B.M., Damiano J.A., Mullen S.A., Newton M.R., Nair U., Gazina E.V., Milligan C.J., Reid C.A., Petrou S., Scheffer I.E., Berkovic S.F., Mefford H.C.	Neurology	86
22292851	Comprehensive analysis of the association of SCN1A gene polymorphisms with the retention rate of carbamazepine following monotherapy for new-onset focal seizures in the Chinese Han population	Article	2012	Zhou B.-T., Zhou Q.-H., Yin J.-Y., Li G.-L., Xu X.-J., Qu J., Liu D., Zhou H.-H., Liu Z.-Q.	Clinical and Experimental Pharmacology and Physiology	39
24902755	Co-occurring malformations of cortical development and SCN1A gene mutations	Article	2014	Barba C., Parrini E., Coras R., Galuppi A., Craiu D., Kluger G., Parmeggiani A., Pieper T., Schmitt-Mechelke T., Striano P., Giordano F., Blumcke I., Guerrini R.	Epilepsia	55
34106054	Focal epilepsy due to de novo SCN1A mutation	Article	2021	Laur D., Dozières-Puyravel B., Iléa A., Nava C., Delanoë C., Nasser H., Le Guern E., Auvin S.	Epileptic Disorders	23
32538476	Focal epilepsy in SCN1A-mutation carrying patients: is there a role for epilepsy surgery?	Article	2020	Vezyroglou A., Varadkar S., Bast T., Hirsch E., Strobl K., Harvey A.S., Scheffer I.E., Sisodiya S.M., Cross J.H., Devlin A., Hedrich U.B.S., Lerche H., Epilepsy Surgery in SCN1A Study Group	Developmental Medicine and Child Neurology	62
18330841	Focal epilepsy resulting from a de novo SCN1A mutation	Article	2007	Okumura A., Kurahashi H., Hirose S., Okawa N., Watanabe K.	Neuropediatrics	38
27777328	Focal Seizures in Patients with SCN1A Mutations: Response to Treatment	Article	2017	McDonald C.L., Saneto R.P., Carmant L., Sotero De Menezes M.A.	Journal of Child Neurology	32
32761786	Modulation of GABAergic dysfunction due to SCN1A mutation linked to Hippocampal Sclerosis	Article	2020	Ruffolo G., Martinello K., Labate A., Cifelli P., Fucile S., Di Gennaro G., Quattrone A., Esposito V., Limatola C., Giangaspero F., Aronica E., Palma E., Gambardella A.	Annals of Clinical and Translational Neurology	7
	Molecular genetic characterization of patients with focal epilepsy using a customized targeted resequencing gene panel	Article	2018	Tsai M.-H., Chan C.-K., Chang Y.-C., Lin C.-H., Liou C.-W., Chang W.-N., Ng C.-C., Lim K.-S., Hwang D.-Y.	Frontiers in Neurology	9
22495309	Sporadic autism exomes reveal a highly interconnected protein network of de novo mutations	Article	2012	O ’ Roak B.J., Vives L., Girirajan S., Karakoc E., Krumm N., Coe B.P., Levy R., Ko A., Lee C., Smith J.D., Turner E.H., Stanaway I.B., Vernot B., Malig M., Baker C., Akey J.M., Borenstein E., Rieder M.J., Nickerson D.A., Bernier R., Shendure J., Eichler E.E.	Nature	485
32183904	Gene family information facilitates variant interpretation and identification of disease-associated genes in neurodevelopmental disorders	Article	Genome Medicine	12	12	12
31139143	The Clinical and Genetic Features of Co-occurring Epilepsy and Autism Spectrum Disorder in Chinese Children	Article	2019	Front Neurol	Front Neurol	Front Neurol	Long S
34368859	Comparative analysis of the autism-related variants between different autistic children in a family pedigree	Article	2021	Shen L., Li P., Zheng T., Luo M., Zhang S., Huang Y., Hu Y., Li H.	Molecular Medicine Reports	24
31662442	A genome-wide search for gene-by-obesity interaction loci of dyslipidemia in Koreans shows diverse genetic risk alleles	Article	2019	Kang M., Sung J.	Journal of Lipid Research	60
28102593	A case for cannabidiol in Wolf–Hirschhorn syndrome seizure management	Article	2017	Ho K.S., Wassman E.R.	American Journal of Medical Genetics, Part A	173
25525853	Upregulated genes at 2q24 gains as candidate oncogenes in hepatoblastomas	Article	2014	Rodrigues T.C., Fidalgo F., Da Costa C.M.L., Ferreira E.N., Da Cunha I.W., Carraro D.M., Krepischi A.C.V., Rosenberg C.	Future Oncology	10
	Migraine-induced epistaxis and sporadic hemiplegic migraine: Unusual features in the same patient	Article（排除）	2012	Barros J., Damsio J., Tuna A., Pereira-Monteiro J.	Case Reports in Neurology	4
	Familial and sporadic hemiplegic migraine: Diagnosis and treatment	Article（排除）	2013	Pelzer N., Stam A.H., Haan J., Ferrari M.D., Terwindt G.M.	Current Treatment Options in Neurology	15
19007941	FHM3 in familial hemiplegic migraine is more resistant to mutation than FHM1 and FHM2（不相关）	Article（排除）	2009	Wiwanitkit V.	Journal of the Neurological Sciences	277
27017028	The Comorbidity of Migraine and Epilepsy in Children and Adolescents（不相关）	Article（排除）	Seminars in Pediatric Neurology	23	23	23
33126486	Comprehensive Exonic Sequencing of Hemiplegic Migraine-Related Genes in a Cohort of Suspected Probands Identifies Known and Potential Pathogenic Variants（不相关）	Article（排除）	2020	Sutherland H.G., Maksemous N., Albury C.L., Ibrahim O., Smith R.A., Lea R.A., Haupt L.M., Jenkins B., Tsang B., Griffiths L.R.	Cells	9
	A Sip of GABA for the Cerebral Cortex	Short Survey	2013	Tomassy G.S., Lodato S., Arlotta P.	Neuron	77
24842605	A novel SCN1A mutation in a cytoplasmic loop in intractable juvenile myoclonic epilepsy without febrile seizures	Case Reports	2014	Jingami N., Matsumoto R., Ito H., Ishii A., Ihara Y., Hirose S., Ikeda A., Takahashi R.	Epileptic Disorders	16
32031527	Age-dependent epileptic encephalopathy associated with an unusual co-occurrence of ZEB2 and SCN1A variants	Article	2020	Nardello R., Fontana A., Donato Mangano G., Efthymiou S., Salpietro V., Houlden H., Mangano S.	Epileptic Disorders	22
23032131	A case of autosomal dominant nocturnal frontal lobe epilepsy (ADNFLE) coexisting with pervasive developmental disorder harboring SCN1A mutation in addition to CHRNB2 mutation	Article	2012	Sone D., Sugawara T., Sakakibara E., Tomioka Y., Taniguchi G., Murata Y., Watanabe M., Kaneko S.	Epilepsy and Behavior	25
32449611	The role of sodium channels in sudden unexpected death in pediatrics	Article	2020	Rochtus A.M., Goldstein R.D., Holm I.A., Brownstein C.A., Pérez-Palma E., Haynes R., Lal D., Poduri A.H.	Molecular Genetics and Genomic Medicine	8
28333919	Exome sequencing-based molecular autopsy of formalin-fixed paraffin-embedded tissue after sudden death	Article	2017	Bagnall R.D., Ingles J., Yeates L., Berkovic S.F., Semsarian C.	Genetics in Medicine	19
26423924	Genetic investigation of sudden unexpected death in epilepsy cohort by panel target resequencing	Article	2016	Coll M., Allegue C., Partemi S., Mates J., Del Olmo B., Campuzano O., Pascali V., Iglesias A., Striano P., Oliva A., Brugada R.	International Journal of Legal Medicine	130
29873813	Heart rate variability in epilepsy: A potential biomarker of sudden unexpected death in epilepsy risk	Article	2018	Myers K.A., Bello-Espinosa L.E., Symonds J.D., Zuberi S.M., Clegg R., Sadleir L.G., Buchhalter J., Scheffer I.E.	Epilepsia	59
24372310	High-resolution molecular genomic autopsy reveals complex sudden unexpected death in epilepsy risk profile	Article	2014	Klassen T.L., Bomben V.C., Patel A., Drabek J., Chen T.T., Gu W., Zhang F., Chapman K., Lupski J.R., Noebels J.L., Goldman A.M.	Epilepsia	55

## Sheet: Full text unavailable(32)
	Epileptic encephalopathies in children with autistic spectrum disorders: From molecular genetic diagnostics to target therapy	Article	2021	Kyrylova L., Miroshnykov A., Yuzva A.	Psychiatry, Psychotherapy and Clinical Psychology	12
	Evaluation of DNA damage and mutation screening of exon 26 of SCN1A gene in patients with epilepsy	Article	2017	Sekar N., Ramgir S., D Prabhu Y., Renu K., V.G A.	International Journal of Epilepsy	4
	Focal genetic epilepsy syndromes: New findings	Article	2016	Neubauer B.A., Hahn A.	Zeitschrift fur Epileptologie	29
	Genetic analysis of the alpha subunit of the voltage-dependent sodium channel (SCN1A) in pediatric patients with refractory epilepsy	Article	2013	Jiménez-Arredondo R.E., Gutiérrez M.J., Solórzano G.E., Chima G.M.D.C., Galaviz H.C., García S., Di Silvio L.M., Esparza R.	Revista Mexicana de Neurociencia	14
	Efficacy of anti-epileptic drugs in patients with epilepsy with febrile seizures plus and the relation with voltage-gated sodium channel al-subunit gene mutations	Article	2014	Yu L., He N., Liu X., Li B., Xu H., Shi Y., Gao M., Yi Y., Liao W.	Chinese Journal of Neurology	47
	Imaging Interneuron Impairment in Ictogenesis: A Spatiotemporal Sweet Spot of Seizure Sampling in Scn1a+/−	Article	2021	Lillis K.P.	Epilepsy Currents
	Lack of meaningful genotype-phenotype association in SCN1A-related infantile-onset epileptic encephalopathies	Article	2017	Wahab S.A.A., Yakob Y., Khoo T.-B., Terumalay S.D., Ganesan V., Teh C.-M., bin Yahaya N.A., Heng H.-S., Vaithialingam M., Wong S.-W.	Neurology Asia	22
	Phenotype and Genotype Relationship between Inherited Cardiac Arrhythmia and Epileptic Syndrome	Article	2011	Omichi C., Fujii D., Sawada T., Narasaki H., Ayabe S., Kimata S.	Journal of Arrhythmia	27
	Phisiopatology of epilepsy: Genetics and environment	Article	2019	Orive G.L.R., Hechavarria S.A.C., Reyes I.M.	Revista Cubana de Investigaciones Biomedicas	38
	Prognostic Challenges of SCN1A Genetic Mutations: Report on Two Children with Mild Features	Article	2016	Praticò A.D., Falsaperla R., Ruggieri M., Corsello G., Pavone P.	Journal of Pediatric Neurology	14
	SCN1A gene variations in epilepsy and migraine patients in Aceh, Indonesia	Article	2018	Lestari N.D., Rahayuningsih E.M., Syahrul S., Emril D.R., Harapan H., Sadewa A.H., Bachtiar A., Sjahrir H.	Polish Annals of Medicine	25
	Voltage gated sodium ion channel and epilepsy	Article	2021	Ishii A.	No To Hattatsu	53
16359473	Neonatal epilepsy syndromes and GEFS+: Mechanistic considerations	Conference Paper	2005	Burgess D.L.	Epilepsia	46
16359471	Neonatal epilepsy syndromes and generalized epilepsy with febrile seizures plus (GEFS+)	Conference Paper	2005	Scheffer I.E., Harkin L.A., Dibbens L.M., Mulley J.C., Berkovic S.F.	Epilepsia	46
	Analysis of genetically complex epilepsies	Conference Paper	2006	Ottman R.	CNS Spectrums	11
	Clinics and genetics of epilepsy: Experience of a study of 47 families [Clinica e genetica dell'epilessia: Esperienza di uno studio su un campione di 47 famiglie]	Conference Paper	2004	Contri M., Rigoldi M., Venturi N., Combi R., Tenchini M.L., Grioni D., Dalprà L., Bertolini M.	Bollettino - Lega Italiana contro l'Epilessia
	Genetic epilepsy with febrile seizures plus (GEFS+)	Conference Paper	2020	Sharkov A.A.	Epilepsy and Paroxysmal Conditions	12
19049592	Genetic influences on ketogenic diet efficacy	Conference Paper	Epilepsia	49	49	49
	Genetics of drug resistance	Conference Paper	2006	Sisodiya S.M.	CNS Spectrums	11
	Neonatal epilepsy syndromes and GEFS+: Mechanistic considerations	Conference Paper	2006	Burgess D.L.	CNS Spectrums	11
	Neonatal epilepsy syndromes and generalized epilepsy with febrile plus (GEFS+)	Conference Paper	2006	Scheffer I.E., Harkin L.A., Dibbens L.M., Mulley J.C., Berkovic S.F.	CNS Spectrums	11
	Phenotipic variability of SCN1A mutations: Case report [Variabilità fenotipica delle mutazioni del gene SCN1A: Descrizione di un caso clinico]	Conference Paper	2013	Vergaro R., Conti S., Scaduto M.C., Santucci M.	Bollettino - Lega Italiana contro l'Epilessia
	SCN1A mutation in a patient with Lennox-Gastaut syndrome and previous west syndrome with unknown etiology [Mutazione di SCN1A in un caso di sindrome di Lennox-Gastaut con pregressa sindrome di West ad eziologia sconosciuta]	Conference Paper	2010	Zucca C., Zanotta N., Epifanio R., Redaelli F., Bassi M.T.	Bollettino - Lega Italiana contro l'Epilessia
	SCN1A mutations in a case of temporal lobe epilepsy with hippocampal sclerosis and familial febrile convulsions [Mutazioni di SCN1A in un caso di epilessia temporale con sclerosi dell'ippocampo e familiarità per convulsioni febbrili]	Conference Paper	2008	Zanotta N., Epifanio R., Redaelli F., Bassi M.T., Zucca C.	Bollettino - Lega Italiana contro l'Epilessia
	SCN1A mutations in a case of unclassified epilepsy with progressive cerebellar atrophy [Mutazioni di SCN1A in un caso di epilessia di incerta classificazione con atrofia cerebellare progressiva]	Conference Paper	2011	Zanotta N., Romaniello R., Arcieri S., Tenderini E., Bassi M.T., Borgatti R., Zucca C.	Bollettino - Lega Italiana contro l'Epilessia
	SCN1A point mutations on neuron connectivity	Conference Paper	2009	Krishnamurthy K., Smith-Parker A., Burton S.D., Zeringue H.C.	Proceedings of the IEEE Annual Northeast Bioengineering Conference, NEBEC
	SCN1A-related infantile epileptic encephalopathy: Two cases reports [Encefalopatia epilettica SCN1A-correlata ad esordio precoce: Descrizione di due casi]	Conference Paper	2011	Vari M.S., Mancardi M.M., Prato G., Pinto F., Mascaretti M., Striano P., Zara F., Consales A., Rossi A., Ottonello G., Veneselli E., Baglietto M.G.	Bollettino - Lega Italiana contro l'Epilessia
12861510	Severe myoclonic epilepsy in infancy. Clinical and paraclinical aspects [Epilepsia mioclónica grave de la infancia. Aspectos clínicos y paraclinicos]	Conference Paper	2003	Martínez-Bermejo A., López-Martín V., Arcas J., Tendero A., Roche-Herrero M.C., Merino M.	Revista de Neurologia	37
26749013	Sudden unexpected death in epilepsy genetics: Molecular diagnostics and prevention	Conference Paper	2016	Goldman A.M., Behr E.R., Semsarian C., Bagnall R.D., Sisodiya S., Cooper P.N.	Epilepsia	57
	The power of association: Lessons from SCN1A and beyond	Conference Paper	2007	Goldstein D.	Epileptic Disorders	9
	Data on mutations and Clinical features in SCN1A or SCN2A gene	Data Paper	2019	Kong Y., Yan K., Hu L., Wang M., Dong X., Lu Y., Wu B., Wang H., Yang L., Zhou W.	Data in Brief	22
17438620	Gene symbol: SCN1A	Case Reports	2007	Hum Genet	Hum Genet	Hum Genet	Combi R

## Sheet: Epilepsytypewasnotdescribed（42）
1	A wide spectrum of genetic disorders causing severe childhood epilepsy in Taiwan: A case series of ultrarare genetic cause and novel mutation analysis in a pilot study	Article	2020	Hong S.-Y., Yang J.-J., Li S.-Y., Lee I.-C.	Journal of Personalized Medicine	10
26189305	ABCB1, ABCC2, SCN1A, SCN2A, GABRA1 gene polymorphisms and drug resistant epilepsy in the Chinese Han population	Article	2015	Zhou L., Cao Y., Long H., Long L., Xu L., Liu Z., Zhang Y., Xiao B.	Pharmazie	70
29649454	Association between SCN1A and SCN2A mutations and clinical/EEG features in Chinese patients from epilepsy or severe seizures	Article	2018	Kong Y., Yan K., Hu L., Wang M., Dong X., Lu Y., Wu B., Wang H., Yang L., Zhou W.	Clinica Chimica Acta	483
26339958	Clinical and histopathological outcomes in patients with SCN1A mutations undergoing surgery for epilepsy	Article	2015	Skjei K.L., Church E.W., Harding B.N., Santi M., Holland-Bouley K.D., Clancy R.R., Porter B.E., Heuer G.G., Marsh E.D.	Journal of Neurosurgery: Pediatrics	16
29655203	Diagnostic outcomes for genetic testing of 70 genes in 8565 patients with epilepsy and neurodevelopmental disorders	Article	2018	Lindy A.S., Stosser M.B., Butler E., Downtain-Pickersgill C., Shanmugham A., Retterer K., Brandt T., Richard G., McKnight D.A.	Epilepsia	59
29056246	Diagnostic Yield From 339 Epilepsy Patients Screened on a Clinical Gene Panel	Article	2017	Butler K.M., da Silva C., Alexander J.J., Hegde M., Escayg A.	Pediatric Neurology	77
1	Diagnostic Yield of Epilepsy Panel Testing in Patients With Seizure Onset Within the First Year of Life	Article	2019	Jang S.S., Kim S.Y., Kim H., Hwang H., Chae J.H., Kim K.J., Kim J.-I., Lim B.C.	Frontiers in Neurology	10
27726903	Diagnostic Yield of Epilepsy Panels in Children With Medication-Refractory Epilepsy	Article	2016	Segal E., Pedro H., Valdez-Gonzalez K., Parisotto S., Gliksman F., Thompson S., Sabri J., Fertig E.	Pediatric Neurology	64
22591328	Effects of SCN1A and GABA Receptor Genetic Polymorphisms on Carbamazepine Tolerability and Efficacy in Chinese Patients with Partial Seizures: 2-Year Longitudinal Clinical Follow-Up	Article	2012	Zhou B.-T., Zhou Q.-H., Yin J.-Y., Li G.-L., Qu J., Xu X.-J., Liu D., Zhou H.-H., Liu Z.-Q.	CNS Neuroscience and Therapeutics	18
33096315	Effects of SCN1A and SCN2A polymorphisms on responsiveness to valproic acid monotherapy in epileptic children	Article	2020	Liu M., Mao J., Xu H., Wang J., Zhao P., Xu Q., Du Z.	Epilepsy Research	168
29679912	Effects of UGT2B7, SCN1A and CYP3A4 on the therapeutic response of sodium valproate treatment in children with generalized seizures	Article	2018	Feng W., Mei S., Zhu L., Yu Y., Yang W., Gao B., Wu X., Zhao Z., Fang F.	Seizure	58
27245092	Evaluating the Role of Genetic Variants on first-line antiepileptic drug response in North India: Significance of SCN1A and GABRA1 Gene Variants in Phenytoin Monotherapy and its Serum Drug Levels	Article	2016	Baghel R., Grover S., Kaur H., Jajodia A., Rawat C., Srivastava A., Kushwaha S., Agarwal R., Sharma S., Kukreti R.	CNS Neuroscience and Therapeutics	22
26990884	Evaluation of presumably disease causing SCN1A variants in a cohort of common epilepsy syndromes	Article	2016	Lal D., Reinthaler E.M., Dejanovic B., May P., Thiele H., Lehesjoki A.-E., Schwarz G., Riesch E., Ikram M.A., Van Duijn C.M., Uitterlinden A.G., Hofman A., Steinböck H., Gruber-Sedlmayr U., Neophytou B., Zara F., Hahn A., Gormley P., Becker F., Weber Y.G., Cilio M.R., Kunz W.S., Krause R., Zimprich F., Lemke J.R., Nürnberg P., Sander T., Lerche H., Neubauer B.A., Palotie A., Ruppert A.-K., Suls A…	PLoS ONE	11
1	Exome sequencing identifies molecular diagnosis in children with drug-resistant epilepsy	Article	2019	Tsang M.H.-Y., Leung G.K.-C., Ho A.C.-C., Yeung K.-S., Mak C.C.-Y., Pei S.L.-C., Yu M.H.-C., Kan A.S.-Y., Chan K.Y.-K., Kwong K.L., Lee S.-L., Yung A.W.-Y., Fung C.-W., Chung B.H.-Y.	Epilepsia Open	4
23647072	Exome sequencing reveals new causal mutations in children with epileptic encephalopathies	Article	2013	Veeramah K.R., Johnstone L., Karafet T.M., Wolf D., Sprissler R., Salogiannis J., Barth-Maron A., Greenberg M.E., Stuhlmann T., Weinert S., Jentsch T.J., Pazzi M., Restifo L.L., Talwar D., Erickson R.P., Hammer M.F.	Epilepsia	54
33728858	Experience in the management of patients with genetic epilepsies and epileptic encephalopathies in the outpatient practice	Article	2021	Rakhmanina O.A., Volkov I.V., Shestakova O.I., Tomenko T.R., Paniukova I.V., Volkova O.K., Belyaev O.V., Omelchenko N.N., Lebedev I.A.	Zhurnal Nevrologii i Psihiatrii imeni S.S. Korsakova	121
20484682	Four generations of epilepsy caused by an inherited microdeletion of the SCN1A gene	Article	2010	Suls A., Velizarova R., Yordanova I., Deprez L., Van Dyck T., Wauters J., Guergueltcheva V., Claes L.R.F., Kremensky I., Jordanova A., De Jonghe P.	Neurology	75
31009440	Genetic and phenotypic characteristics of SCN1A -related epilepsy in Chinese children	Article	2019	Fang Z.-X., Hong S.-Q., Li T.-S., Wang J., Xie L.-L., Han W., Jiang L.	NeuroReport	30
30182498	Genotype and phenotype analysis using an epilepsy-associated gene panel in Chinese pediatric epilepsy patients	Article	2018	Miao P., Feng J., Guo Y., Wang J., Xu X., Wang Y., Li Y., Gao L., Zheng C., Cheng H.	Clinical Genetics	94
33278787	High genetic burden in 163 Chinese children with status epilepticus	Article	2021	Wang T., Wa ng J., Ma Y., Zhou H., Ding D., Li C., Du X., Jiang Y.-H., Wang Y., Long S., Li S., Lu G., Chen W., Zhou Y., Zhou S.	Seizure	84
30185235	Novel and de novo mutations in pediatric refractory epilepsy	Article	2018	Liu J., Tong L., Song S., Niu Y., Li J., Wu X., Zhang J., Zai C.C., Luo F., Wu J., Li H., Wong A.H.C., Sun R., Liu F., Li B.	Molecular Brain	11
21692795	Refractory neonatal epilepsy with a de novo duplication of chromosome 2q24.2q24.3	Article	2011	Okumura A., Yamamoto T., Shimojima K., Honda Y., Abe S., Ikeno M., Shimizu T.	Epilepsia	52
34556045	Response to Sodium Channel blocking Antiseizure medications and coding polymorphisms of Sodium Channel genes in Taiwanese epilepsy patients	Article	2021	Lin C.-H., Ho C.-J., Lu Y.-T., Tsai M.-H.	BMC Neurology	21
1	SCN1A and SCN1B gene polymorphisms and their association with plasma concentrations of carbamazepine and carbamazepine 10, 11 epoxide in iranian epileptic patients	Article	2015	Namazi S., Azarpira N., Javidnia K., Emami M., Rahjoo R., Berahmand R., Borhani-Haghighi A.	Iranian Journal of Basic Medical Sciences	18
30693367	SCN1A and SCN2A polymorphisms are associated with response to valproic acid in Chinese epilepsy patients	Article	2019	Shi L., Zhu M., Li H., Wen Z., Chen X., Luo J., Lin C., Zhang Z.	European Journal of Clinical Pharmacology	75
23057548	SCN1A IVS5N+5 polymorphism and response to sodium valproate: A multicenter study	Article	2012	Haerian B.S., Baum L., Tan H.J., Kwan P., Raymond A.A., Saruwatari J., Nakagawa K., Mohamed Z.	Pharmacogenomics	13
31252281	Short- and long-term seizure-free outcomes of dietary treatment in infants according to etiology	Article	Seizure	71	71	71
18784617	Multidrug resistance in epilepsy and polymorphisms in the voltage-gated sodium channel genes SCN1A, SCN2A, and SCN3A: Correlation among phenotype, genotype, and mRNA expression	Article	2008	Kwan P., Poon W.S., Ng H.-K., Kang D.E., Wong V., Ng P.W., Lui C.H.T., Sin N.C., Wong K.S., Baum L.	Pharmacogenetics and Genomics	18
28753467	The association of SCN1A p.Thr1067Ala polymorphism with epilepsy risk and the response to antiepileptic drugs in Slovenian children and adolescents with epilepsy	Article	2017	Bertok S., Dolžan V., Goričar K., Podkrajšek K.T., Battelino T., Rener-Primec Z.	Seizure	51
24854149	The case for medical marijuana in epilepsy	Article	2014	Maa E., Figi P.	Epilepsia	55
30945278	The combination of whole-exome sequencing and copy number variation sequencing enables the diagnosis of rare neurological disorders	Article	2019	Jiao Q., Sun H., Zhang H., Wang R., Li S., Sun D., Yang X.-A., Jin Y.	Clinical Genetics	96
28005047	The diagnosis of idiopathic epilepsy in children based on the algorithm of molecular-genetic studies	Article	2016	Kozhanova T.V., Zhylina S.S., Aivazian S.O., Ananyeva T.V., Abramov A.A., Belenikin M.S., Meshcheryakova T.I., Mutovin G.R., Zavadenko N.N.	Zhurnal Nevrologii i Psihiatrii imeni S.S. Korsakova	116
30803845	The Ketogenic and Modified Atkins Diet Therapy for Children With Refractory Epilepsy of Genetic Etiology	Article	Pediatric Neurology	94	94	94
33721710	The MinION as a cost-effective technology for diagnostic screening of the SCN1A gene in epilepsy patients	Article	2021	Ngo T.T.D., Lea R.A., Maksemous N., Eccles D.A., Smith R.A., Dunn P.J., Thao V.C., Ha T.M.T., Bùi C.B., Haupt L.M., Scott R., Griffiths L.R.	Epilepsy Research	172
30977854	Use of a Dynamic Genetic Testing Approach for Childhood-Onset Epilepsy	Article	2019	Balciuniene J., DeChene E.T., Akgumus G., Romasko E.J., Cao K., Dubbs H.A., Mulchandani S., Spinner N.B., Conlin L.K., Marsh E.D., Goldberg E., Helbig I., Sarmady M., Abou Tayoun A.	JAMA network open	2
33902223	[The etiology of 340 infants with early-onset epilepsy]	Article	2021	Zhonghua Er Ke Za Zhi	Zhonghua Er Ke Za Zhi	Zhonghua Er Ke Za Zhi	Song TY
30619928	Data on mutations and Clinical features in SCN1A or SCN2A gene	Article	2018	Data Brief	Data Brief	Data Brief	Kong Y
30034362	Molecular Genetic Characterization of Patients With Focal Epilepsy Using a Customized Targeted Resequencing Gene Panel	Article	2018	Front Neurol	Front Neurol	Front Neurol	Tsai MH
20358620	Severe pulmonary emphysema in a girl with interstitial deletion of 2q24.2q24.3 including ITGB6	Article	2010	Takatsuki S., Nakamura R., Haga Y., Mitsui K., Hashimoto T., Shimojima K., Saji T., Yamamoto T.	American Journal of Medical Genetics, Part A	152
	Epilepsy with auditory features A heterogeneous clinico-molecular disease	Article	2015	Pippucci T., Licchetta L., Baldassari S., Palombo F., Menghi V., D'Aurizio R., Leta C., Stipa C., Boero G., D'Orsi G., Magi A., Scheffer I., Seri M., Tinuper P., Bisulli F.	Neurology: Genetics	1
33453592	Epilepsy with auditory features: Contribution of known genes in 112 patients	Article	2021	Bisulli F., Rinaldi C., Pippucci T., Minardi R., Baldassari S., Zenesini C., Mostacci B., Fanella M., Avoni P., Menghi V., Caporali L., Muccioli L., Tinuper P., Licchetta L.	Seizure	85
21959335	High incidence of pediatric idiopathic epilepsy is associated with familial and autosomal dominant disease in Eastern Newfoundland	Article	2012	Mahoney K., Buckley D., Alam M., Penney S., Young T.-L., Parfrey P., Moore S.J.	Epilepsy Research	98

## Sheet: Dravet(303)
28441824	[Clinical and neuroimaging features of acute encephalopathy after status epilepticus in Dravet syndrome]	Article	2017	Zhonghua Er Ke Za Zhi	Zhonghua Er Ke Za Zhi	Zhonghua Er Ke Za Zhi	Tian XJ
19099883	[Clinical features and SCN1A gene mutation analysis of severe myoclonic epilepsy of infancy].	Article	2008	Zhang Y.H., Sun H.H., Liu X.Y., Ma X.W., Yang Z.X., Xiong H., Qin J., Lin Q., Wu X.R.	Zhonghua er ke za zhi. Chinese journal of pediatrics	46
29141311	[Study on mosaicism of SCN1A gene mutation in parents of children with Dravet syndrome]	Article	2017	Zhonghua Er Ke Za Zhi	Zhonghua Er Ke Za Zhi	Zhonghua Er Ke Za Zhi	Liu AJ
30872930	A case of Dravet Syndrome with a newly defined mutation in the SCN1A gene	Case Reports	2018	Turk Pediatri Ars	Turk Pediatri Ars	Turk Pediatri Ars	Tun?er G?
1	A case of Dravet Syndrome with a newly defined mutation in the SCN1A gene	Article	2018	Öz Tunçer G., Teber S., Albayrak P., Kutluk M.G., Deda G.	Turk Pediatri Arsivi	53
27523882	A case of Dravet syndrome with cortical myoclonus indicated by jerk-locked back-averaging of electroencephalogram data	Article	2017	Kobayashi Y., Hanaoka Y., Akiayma T., Ohmori I., Ouchida M., Yamamoto T., Oka M., Yoshinaga H., Kobayashi K.	Brain and Development	39
25986186	A clinical variant in SCN1A inherited from a mosaic father cosegregates with a novel variant to cause Dravet syndrome in a consanguineous family	Article	2015	Tuncer F.N., Gormez Z., Calik M., Altiokka Uzun G., Sagiroglu M.S., Yuceturk B., Yuksel B., Baykan B., Bebek N., Iscan A., Ugur Iseri S.A., Ozbek U.	Epilepsy Research	113
16122630	A missense mutation in SCN1A in brothers with severe myoclonic epilepsy in infancy (SMEI) inherited from a father with febrile seizures	Article	2005	Kimura K., Sugawara T., Mazaki-Miyazaki E., Hoshino K., Nomura Y., Tateno A., Hachimori K., Yamakawa K., Segawa M.	Brain and Development	27
33816011	A Mutation in the SCN1A Gene With a Peculiar Course: A Case Report	Case Reports	2021	Cureus	Cureus	Cureus	Sur L
17000989	A new molecular mechanism for severe myoclonic epilepsy of infancy: Exonic deletions in SCN1A	Article	2006	Mulley J.C., Nelson P., Guerrero S., Dibbens L., Iona X., McMahon J.M., Harkin L., Schouten J., Yu S., Berkovic S.F., Scheffer I.E.	Neurology	67
1	A new SCN1A mutation in a patient affected by severe myoclonic epilepsy of infancy	Article	2005	Zucca C., Zanotta N., Panzeri C., Airoldi G., Redaelli F., Bassi M.T.	Bollettino - Lega Italiana contro l'Epilessia
21114141	A novel de novo SCN1A missense mutation in severe myoclonic epilepsy borderland	Article	2010	Specchio N., Trivisano M., Balestri M., Gennaro E., Specchio L.M., Fusco L., Zara F., Vigevano F.	Acta Neurologica Belgica	110
25569746	A novel inherited SCN1A mutation associated with different neuropsychological phenotypes: Is there a common core deficit?	Article	2015	Passamonti C., Petrelli C., Mei D., Foschi N., Guerrini R., Provinciali L., Zamponi N.	Epilepsy and Behavior	43
33042244	A Novel SCN1A Mutation: A Case Report	Article	2020	J Pediatr Neurosci	J Pediatr Neurosci	J Pediatr Neurosci	Aslan M
31102827	A novel variant in SCN1A gene associated with Dravet syndrome	Article	2019	Pathirana B.A.P.S., Hettiarachchi D., Neththikumara N.F., Ratnayake P.D., Dissanayake V.H.W.	Seizure	69
24464349	A novel variant in the 3′ UTR of human SCN1A gene from a patient with Dravet syndrome decreases mRNA stability mediated by GAPDH's binding	Article	2014	Zeng T., Dong Z.-F., Liu S.-J., Wan R.-P., Tang L.-J., Liu T., Zhao Q.-H., Shi Y.-W., Yi Y.-H., Liao W.-P., Long Y.-S.	Human Genetics	133
21531204	A putative disease-associated haplotype within the SCN1A gene in Dravet syndrome	Article	2011	Fendri-Kriaa N., Boujilbene S., Kammoun F., Mkaouar-Rebai E., Mahmoud A.B., Hsairi I., Rebai A., Triki C., Fakhfakh F.	Biochemical and Biophysical Research Communications	408
18076640	A Screening test for the prediction of Dravet syndrome before one year of age	Article	2008	Hattori J., Ouchida M., Ono J., Miyake S., Maniwa S., Mimaki N., Ohtsuka Y., Ohmori I.	Epilepsia	49
31864146	A single-center, retrospective analysis of genotype-phenotype correlations in children with Dravet syndrome	Article	2020	Gertler T.S., Calhoun J., Laux L.	Seizure	75
30526861	Aberrant Inclusion of a Poison Exon Causes Dravet Syndrome and Related SCN1A-Associated Genetic Epilepsies	Article	2018	Carvill G.L., Engel K.L., Ramamurthy A., Cochran J.N., Roovers J., Stamberger H., Lim N., Schneider A.L., Hollingsworth G., Holder D.H., Regan B.M., Lawlor J., Lagae L., Ceulemans B., Bebin E.M., Nguyen J., Striano P., Zara F., Helbig I., Møller R.S., von Spiczak S., Muhle H., Caglayan H., Sterbova K., Craiu D., Hoffman D., Lehesjoki A.-E., Selmer K., Depienne C., Lemke J., Marini C., Guerrini R.…	American Journal of Human Genetics	103
31879226	Abnormal brain gamma oscillations in response to auditory stimulation in Dravet syndrome	Article	2020	Sanchez-Carpintero R., Urrestarazu E., Cieza S., Alegre M., Artieda J., Crespo-Eguilaz N., Valencia M.	European Journal of Paediatric Neurology	24
25924876	Activity of drugs and components of natural origin in the severe myoclonic epilepsy of infancy (Dravet syndrome)	Article	2015	Berio A., Piazzi A.	Central Nervous System Agents in Medicinal Chemistry	15
21647847	Acute encephalopathy in a patient with Dravet syndrome	Article	2011	Tsuji M., Mazaki E., Ogiwara I., Wada T., Iai M., Okumura A., Yamashita S., Yamakawa K., Osaka H.	Neuropediatrics	42
22092154	Acute encephalopathy in children with Dravet syndrome	Article	2012	Okumura A., Uematsu M., Imataka G., Tanaka M., Okanishi T., Kubota T., Sudo A., Tohyama J., Tsuji M., Ohmori I., Naiki M., Hiraiwa-Sofue A., Sato H., Saitoh S., Shimizu T.	Epilepsia	53
20491869	Acute encephalopathy with a truncation mutation in the SCN1A gene: A case report	Article	2010	Takayanagi M., Haginoya K., Umehara N., Kitamura T., Numata Y., Wakusawa K., Hino-Fukuyo N., Mazaki E., Yamakawa K., Ohura T., Ohtake M.	Epilepsia	51
19303743	Addition of verapamil in the treatment of severe myoclonic epilepsy in infancy	Article	2009	Iannetti P., Parisi P., Spalice A., Ruggieri M., Zara F.	Epilepsy Research	85
22226577	Additional information regarding "Dravet syndrome: inroads into understanding epileptic encephalopathies"	Article	2012	J Pediatr	J Pediatr	J Pediatr	Kobayashi K
1	Adult phenotypes in Angelman- and Rett-like syndromes	Article	2012	Willemsen M.H., Rensen J.H.M., Van Schrojenstein-Lantman De Valk H.M.J., Hamel B.C.J., Kleefstra T.	Molecular Syndromology	2
21371021	Adults with a history of possible Dravet syndrome: An illustration of the importance of analysis of the SCN1A gene	Article	2011	Verbeek N.E., Van Kempen M., Gunning W.B., Renier W.O., Westland B., Lindhout D., Brilstra E.H.	Epilepsia	52
28683344	Age-related “Sleep/nocturnal” tonic and tonic clonic seizure clusters are underdiagnosed in patients with Dravet Syndrome	Article	2017	Losito E., Kuchenbuch M., Chemaly N., Laschet J., Chiron C., Kaminska A., Nabbout R.	Epilepsy and Behavior	74
21844054	Alleged cases of vaccine encephalopathy rediagnosed years later as dravet syndrome	Article	2011	Reyes I.S., Hsieh D.T., Laux L.C., Wilfong A.A.	Pediatrics	128
26096185	Amplicon Resequencing Identified Parental Mosaicism for Approximately 10% of "de novo" SCN1A Mutations in Children with Dravet Syndrome	Article	2015	Xu X., Yang X., Wu Q., Liu A., Yang X., Ye A.Y., Huang A.Y., Li J., Wang M., Yu Z., Wang S., Zhang Z., Wu X., Wei L., Zhang Y.	Human Mutation	36
22824327	An electroclinical study of absence seizures in Dravet syndrome	Article	Epilepsy Research	103	103	103
19809937	An inherited nonsense R1645X mutation in neuronal sodium channel 1-subunit gene in a Turkish patient with severe myoclonic epilepsy of infancy	Article	2009	Gökben S., Berdeli A., Serdarolu G.	Neuropediatrics	40
17636062	An open-label trial of levetiracetam in severe myoclonic epilepsy of infancy	Article	2007	Striano P., Coppola A., Pezzella M., Ciampa C., Specchio N., Ragona F., Mancardi M.M., Gennaro E., Beccaria F., Capovilla G., Rasmini P., Besana D., Coppola G.G., Elia M., Granata T., Vecchi M., Vigevano F., Viri M., Gaggero R., Striano S., Zara F.	Neurology	69
26252084	Analysis of parental origin of de novo SCN1A mutations in Dravet syndrome	Article	2015	Sun H., Zhang Y., Xu X., Liu X., Wu X.	Chinese Journal of Medical Genetics	32
29188601	Analysis of SCN1A deletions or duplications in patients with Dravet syndrome	Article	2017	Zeng Q., Zhang Y., Yang X., Xu X., Zhang J., Tian X., Liu A., Liu X., Jiang Y., Wu X.	Chinese Journal of Medical Genetics	34
33565071	Analysis of SCN1A gene variants among patients with Dravet syndrome	Article	2021	Li L., Zhu D.	Zhonghua yi xue yi chuan xue za zhi = Zhonghua yixue yichuanxue zazhi = Chinese journal of medical genetics	38
20431604	Analysis of SCN1A mutation and parental origin in patients with Dravet syndrome	Article	2010	Sun H., Zhang Y., Liu X., Ma X., Yang Z., Qin J., Jiang Y., Qi Y., Wu X.	Journal of Human Genetics	55
22098725	Are SCN1A gene mutations responsible for genetic susceptibility to subacute sclerosing panencephalitis?	Article	2012	Garg R.K.	Medical Hypotheses	78
25669891	Association of severe myoclonic epilepsy of infancy (SMEI) with probable autoimmune lymphoproliferative syndrome-variant	Article	2014	Berio A., Mangiante G., Piazzi A.	Pediatria Medica e Chirurgica	36
24328833	Atypical multifocal Dravet syndrome lacks generalized seizures and may show later cognitive decline	Article	2014	Kim Y.O., Bellows S., Mcmahon J.M., Iona X., Damiano J., Dibbens L., Kelley K., Gill D., Cross J.H., Berkovic S.F., Scheffer I.E.	Developmental Medicine and Child Neurology	56
27231140	Audit of use of stiripentol in adults with Dravet syndrome	Article	2017	Balestrini S., Sisodiya S.M.	Acta Neurologica Scandinavica	135
18294202	Balanced translocation in a patient with severe myoclonic epilepsy of infancy disrupts the sodium channel gene SCN1A	Article	2008	Møller R.S., Schneider L.M., Hansen C.P., Bugge M., Ullmann R., Tommerup N., Tümer Z.	Epilepsia	49
30578097	Behavior problems and health-related quality of life in Dravet syndrome	Article	2019	Sinoo C., de Lange I.M.-L., Westers P., Gunning W.B., Jongmans M.J., Brilstra E.H.	Epilepsy and Behavior	90
21463273	Borderline Dravet syndrome: A useful diagnostic category?	Article	2011	Guerrini R., Oguni H.	Epilepsia	52
25048308	Brain morphometry of Dravet Syndrome	Article	2014	Pérez A., García-Pentón L., Canales-Rodríguez E.J., Lerma-Usabiaga G., Iturria-Medina Y., Román F.J., Davidson D., Alemán-Gómez Y., Acha J., Carreiras M.	Epilepsy Research	108
17381446	Brain MRI findings in severe myoclonic epilepsy in infancy and genotype-phenotype correlations	Article	2007	Striano P., Mancardi M.M., Biancheri R., Madia F., Gennaro E., Paravidino R., Beccaria F., Capovilla G., Bernardina B.D., Darra F., Elia M., Giordano L., Gobbi G., Granata T., Ragona F., Guerrini R., Marini C., Mei D., Longaretti F., Romeo A., Siri L., Specchio N., Vigevano F., Striano S., Tortora F., Rossi A., Minetti C., Dravet C., Gaggero R., Zara F.	Epilepsia	48
22430156	Bromide in patients with SCN1A -mutations manifesting as dravet syndrome	Article	2012	Lotte J., Haberlandt E., Neubauer B., Staudt M., Kluger G.	Neuropediatrics	43
29692967	Can the combination of hyperthermia, seizures and ion channel dysfunction cause fatal post-ictal cerebral edema in patients with SCN1A mutations?	Case Reports	2017	Epilepsy Behav Case Rep	Epilepsy Behav Case Rep	Epilepsy Behav Case Rep	Büren C
31533007	Case studies in neuroscience: A novel amino acid duplication in the NH2terminus of the brain sodium channel NaV1.1 underlying Dravet syndrome	Article	2019	Angus M., Peters C.H., Poburko D., Brimble E., Spelbrink E.M., Ruben P.C.	Journal of Neurophysiology	122
19786689	Child neurology: Dravet syndrome: When to suspect the diagnosis	Article	2009	Millichap J.J., Koh S., Laux L.C., Nordli D.R.	Neurology	73
19070316	Clinical and genetic diagnosis of Dravet syndrome: report of 20 cases	Article	2008	Zsuzsa S., Magdolna N., Márta H., Eva P., Beatrix P., Andrea T., Péter B., Veronika K., Lieve C., De Peter J., Agnes H., András F.	Ideggyógyászati szemle	61
28202706	Clinical and genetic factors predicting Dravet syndrome in infants with SCN1A mutations	Article	2017	Cetica V., Chiari S., Mei D., Parrini E., Grisotto L., Marini C., Pucatti D., Ferrari A., Sicca F., Specchio N., Trivisano M., Battaglia D., Contaldo I., Zamponi N., Petrelli C., Granata T., Ragona F., Avanzini G., Guerrini R.	Neurology	88
30558019	Clinical and molecular analysis of epilepsy-related genes in patients with Dravet syndrome	Article	2018	Jiang T., Shen Y., Chen H., Yuan Z., Mao S., Gao F.	Medicine (United States)	97
1	Clinical characteristics, resource utilization, quality of life and care situation for patients with Dravet syndrome in Germany	Article	2019	Kalski M., Schubert-Bast S., Kieslich M., Leyer A.‑C., Polster T., Herting A., Mayer T., Trollmann R., Neubauer B.A., Bettendorf U., Bast T., Wiemer-Kruel A., von Spiczak S., Kurlemann G., Wolff M., Kluger G., Carroll J., Macdonald D., Pritchard C., Irwin J., Klein K.M., Rosenow F., Strzelczyk A., Kay L.	Zeitschrift fur Epileptologie	32
15087100	Clinical correlations of mutations in the SCN1A gene: From febrile seizures to severe myoclonic epilepsy in infancy	Article	2004	Ceulemans B.P.G.M., Claes L.R.F., Lagae L.G.	Pediatric Neurology	30
31439038	Clinical exome sequencing identifies two novel mutations of the SCN1A and SCN2A genes in Moroccan patients with epilepsy: A case series	Article	2019	Sahli M., Zrhidri A., Elaloui S.C., Smaili W., Lyahyai J., Oudghiri F.Z., Sefiani A.	Journal of Medical Case Reports	13
1	Clinical features of Dravet syndrome patients with SCN1A gene mutations	Article	2016	Li D., Huang S.-P., Song T.-T., Yang L., Yang C.-H., Wang X.-Y.	Journal of Xi'an Jiaotong University (Medical Sciences)	37
28012175	Clinical implications of SCN1A missense and truncation variants in a large Japanese cohort with Dravet syndrome	Article	2017	Ishii A., Watkins J.C., Chen D., Hirose S., Hammer M.F.	Epilepsia	58
34673242	Clinical next generation sequencing in developmental and epileptic encephalopathies: Diagnostic relevance of data re-analysis and variants re-interpretation	Article	2021	Eur J Med Genet	Eur J Med Genet	Eur J Med Genet	Salinas V
1	Clinical-electroencephalogram characteristics and its evolutionary process of Dravet syndrome	Article	2010	Qiu J.-M., Liu X.-Y., Zhang Y.-H., Sun H.-H., Yang Z.-X., Ma X.-W.	Chinese Journal of Neurology	43
24412860	Cognitive and adaptive evaluation of 21 consecutive patients with Dravet syndrome	Article	2014	Villeneuve N., Laguitton V., Viellard M., Lépine A., Chabrol B., Dravet C., Milh M.	Epilepsy and Behavior	31
21463278	Cognitive development in children with Dravet syndrome	Article	2011	Ragona F.	Epilepsia	52
21269283	Cognitive development in Dravet syndrome: A retrospective, multicenter study of 26 patients	Article	2011	Ragona F., Granata T., Bernardina B.D., Offredi F., Darra F., Battaglia D., Morbi M., Brazzo D., Cappelletti S., Chieffo D., De Giorgi I., Fontana E., Freri E., Marini C., Toraldo A., Specchio N., Veggiotti P., Vigevano F., Guerrini R., Guzzetta F., Dravet C.	Epilepsia	52
32858363	Cognitive, behavioral, and social functioning in children and adults with Dravet syndrome	Article	2020	Epilepsy Behav	Epilepsy Behav	Epilepsy Behav	Brown A
21668444	Comorbidities and predictors of health-related quality of life in Dravet syndrome	Article	2011	Brunklaus A., Dorris L., Zuberi S.M.	Epilepsia	52
25697436	Complex febrile seizures or dravet syndrome? Description of 3 case reports	Article	2014	Hernández M.C., Pedraza M.H., Mesa T.L., Troncoso M.S.	Revista Chilena de Pediatria	85
17030758	Cryptic chromosome deletions involving SCN1A in severe myoclonic epilepsy of infancy	Article	2006	Madia F., Striano P., Gennaro E., Malacarne M., Paravidino R., Biancheri R., Budetta M., Cilio M.R., Gaggero R., Pierluigi M., Minetti C., Zara F.	Neurology	67
18413471	Cryptogenic epileptic syndromes related to SCN1A: Twelve novel mutations identified	Article	2008	Zucca C., Redaelli F., Epifanio R., Zanotta N., Romeo A., Lodi M., Veggiotti P., Airoldi G., Panzeri C., Romaniello R., De Polo G., Bonanni P., Cardinali S., Baschirotto C., Martorell L., Borgatti R., Bresolin N., Bassi M.T.	Archives of Neurology	65
33674996	De novo homozygous variant of the SCN1A gene in a patient with severe Dravet syndrome complicated by acute encephalopathy	Article	2021	Van L.T.K., Hien H.T.D., Kieu H.T.T., Hieu N.L.T., Vinh L.S., Hoa G., Hang D.T.T.	Neurogenetics	22
11359211	De novo mutations in the sodium-channel gene SCN1A cause severe myoclonic epilepsy of infancy	Article	2001	Claes L., Del-Favero J., Ceulemans B., Lagae L., Van Broeckhoven C., De Jonghe P.	American Journal of Human Genetics	68
26614543	De novo SCN1A gene deletion in therapy-resistant Dravet syndrome	Article	2015	Bene J., Hadzsiev K., Komlósi K., Kövesdi E., Mátyás P., Melegh B.	Orvosi Hetilap	156
12754708	De novo SCN1A mutations are a major cause of severe myoclonic epilepsy of infancy	Article	2003	Claes L., Ceulemans B., Audenaert D., Smets K., Löfgren A., Del-Favero J., Ala-Mello S., Basel-Vanagaite L., Plecko B., Raskin S., Thiry P., Wolf N.I., Van Broeckhoven C., De Jonghe P.	Human Mutation	21
19589774	De novo SCN1A mutations in Dravet syndrome and related epileptic encephalopathies are largely of paternal origin	Article	2010	Heron S.E., Scheffer I.E., Iona X., Zuberi S.M., Birch R., McMahon J.M., Bruce C.M., Berkovic S.F., Mulley J.C.	Journal of Medical Genetics	47
1	De novo sodium channel α1-subunit mutation of monozygotic twins with borderland severe myoclonic epilepsy in infancy	Article	2009	Chen L., Shi Y.-W., Yu M.-J., Deng W.-Y., Liu X.-R., Gao M.-M., Chang H.-H., Long Y.-S., Yi Y.-H., Liao W.-P.	Chinese Journal of Neurology	42
34338318	Defining Dravet syndrome: An essential pre-requisite for precision medicine trials	Article	2021	Li W., Schneider A.L., Scheffer I.E.	Epilepsia	62
1	Definite sudep in dravet syndrome: An adult case report	Article	2015	Dede H.Ö., Gelİşİn Ö., Baykan B., Çağlayan H., Topaloğlu P., Gürses C., Bebek N., Gökyİğİt A.	Journal of Neurological Sciences	32
18539002	Deletion of the SCN gene cluster on 2q24.4 is associated with severe epilepsy: An array-based genotype-phenotype correlation and a comprehensive review of previously published cases	Article	2008	Davidsson J., Collin A., Olsson M.E., Lundgren J., Soller M.	Epilepsy Research	81
28525652	Determination of SCN1A genetic variants in Mexican patients with refractory epilepsy and Dravet syndrome	Article	2017	Genet Mol Res	Genet Mol Res	Genet Mol Res	Jiménez-Arredondo RE
29852413	Diagnostic yield of targeted massively parallel sequencing in children with epileptic encephalopathy	Article	2018	Kothur K., Holman K., Farnsworth E., Ho G., Lorentzos M., Troedson C., Gupta S., Webster R., Procopis P.G., Menezes M.P., Antony J., Ardern-Holmes S., Dale R.C., Christodoulou J., Gill D., Bennetts B.	Seizure	59
22525008	Different degrees of loss of function between GEFS+ and SMEI Nav 1.1 missense mutants at the same residue induced by rescuable folding defects	Article	2012	Epilepsia	Epilepsia	Epilepsia	Sugiura Y
29295803	Differential effects on sodium current impairments by distinct SCN1A mutations in GABAergic neurons derived from Dravet syndrome patients	Article	2018	Kim H.W., Quan Z., Kim Y.-B., Cheong E., Kim H.D., Cho M., Jang J., Yoo Y.R., Lee J.S., Kim J.H., Kim Y.I., Kim D.-S., Kang H.-C.	Brain and Development	40
19694741	Differential role of sodium channels SCN1A and SCN2A gene polymorphisms with epilepsy and multiple drug resistance in the north Indian population	Article	2009	Lakhan R., Kumari R., Misra U.K., Kalita J., Pradhan S., Mittal B.	British Journal of Clinical Pharmacology	68
19359143	Digenic mutations in severe myoclonic epilepsy of infancy	Article	2009	Bolszak M., Anttonen A.-K., Komulainen T., Hinttala R., Pakanen S., Sormunen R., Herva R., Lehesjoki A.-E., Majamaa K., Rantala H., Uusimaa J.	Epilepsy Research	85
1	Double somatic mosaicism in a child with Dravet syndrome	Article	2019	Muir A.M., King C., Schneider A.L., Buttar A.S., Scheffer I.E., Sadleir L.G., Mefford H.C.	Neurology: Genetics	5
22050316	Dravet syndrome - considerable delay in making the diagnosis	Article	2012	Bremer A., Lossius M.I., Nakken K.O.	Acta Neurologica Scandinavica	125
17621480	Dravet syndrome (severe myoclonic epilepsy in infancy): A retrospective study of 16 patients	Article	2007	Korff C., Laux L., Kelley K., Goldstein J., Koh S., Nordli D.	Journal of Child Neurology	22
21463290	Dravet syndrome and parent associations: The IDEA League experience with comorbid conditions, mortality, management, adaptation, and grief	Article	2011	Skluzacek J.V., Watts K.P., Parsy O., Wical B., Camfield P.	Epilepsia	52
21719429	Dravet syndrome as epileptic encephalopathy: evidence from long-term course and neuropathology	Article	2011	Brain	Brain	Brain	Catarino CB
30805006	Dravet Syndrome in Lebanon: First Report on Cases with SCN1A Mutations	Article	2019	Case Rep Med	Case Rep Med	Case Rep Med	Alame S
30321769	Dravet syndrome in South African infants: Tools for an early diagnosis	Article	2018	Esterhuizen A.I., Mefford H.C., Ramesar R.S., Wang S., Carvill G.L., Wilmshurst J.M.	Seizure	62
25772213	Dravet syndrome in Sweden: a population-based study	Article	2015	Dev Med Child Neurol	Dev Med Child Neurol	Dev Med Child Neurol	Rosander C
27209029	Dravet syndrome with favourable cognitive and behavioral development due to a novel SCN1A frameshift mutation	Article	2016	Jiang P., Shen J., Yu Y., Jiang L., Xu J., Xu L., Yu H., Gao F.	Clinical Neurology and Neurosurgery	146
33199159	Dravet syndrome with parkinsonian symptoms and intact dopaminergic neurons: A case report	Article	2021	Kanatani M., Adachi T., Sakata R., Nishimura Y., Saito Y., Maegaki Y., Watanabe Y., Hanajima R.	Brain and Development	43
1	Dravet syndrome: A case report with a new missense substitution as 1274 Tyr > Asp	Article	2011	Moghaddasi M., Mamarabadi M., Ebrahimi A., Tonekaboni S.H., Zainali S., Houshmand M.	Journal of Pediatric Neurology	9
28469861	Dravet syndrome: a new causative SCN1A mutation?	Case Reports	2017	Clin Case Rep	Clin Case Rep	Clin Case Rep	Poryo M
19854600	Dravet syndrome: Early clinical manifestations and cognitive outcome in 37 Italian patients	Article	2010	Ragona F., Brazzo D., Giorgi I.D., Morbi M., Freri E., Teutonico F., Gennaro E., Zara F., Binelli S., Veggiotti P., Granata T.	Brain and Development	32
23808377	Dravet syndrome: New potential genetic modifiers, imaging abnormalities, and ictal findings	Article	2013	Gaily E., Anttonen A.-K., Valanne L., Liukkonen E., Träskelin A.-L., Polvi A., Lommi M., Muona M., Eriksson K., Lehesjoki A.-E.	Epilepsia	54
21906962	Dravet syndrome: Patients with co-morbid SCN1A gene mutations and mitochondrial electron transport chain defects	Article	2012	Craig A.K., De Menezes M.S., Saneto R.P.	Seizure	21
1	Dravet syndrome: Severe myoclonic epilepsy in infancy - Case reports	Article	2014	Danhofer P., Horák O., Fajkusová L., Pavloušková J., Ošlejšková H.	Ceska a Slovenska Neurologie a Neurochirurgie	77
1	Dravet syndrome-A case report from Aseer, Saudi Arabia	Article	2020	Behir M.M., Saeed M., Siddiqui A.F.	Bangladesh Journal of Medical Science	19
1	Dravet's syndrome; A catastrophic epileptic syndrome	Article	2013	Saeed M., Shabbir N., Qadir K.	Pakistan Paediatric Journal	37
28148630	Dysarthria and broader motor speech deficits in Dravet syndrome	Article	2017	Turner S.J., Brown A., Arpone M., Anderson V., Morgan A.T., Scheffer I.E.	Neurology	88
24168886	Early clinical features and diagnosis of Dravet syndrome in 138 Chinese patients with SCN1A mutations	Article	2014	Xu X., Zhang Y., Sun H., Liu X., Yang X., Xiong H., Jiang Y., Bao X., Wang S., Yang Z., Wu Y., Qin J., Lin Q., Wu X.	Brain and Development	36
22071555	Early clinical features in Dravet syndrome patients with and without SCN1A mutations	Article	2012	Petrelli C., Passamonti C., Cesaroni E., Mei D., Guerrini R., Zamponi N., Provinciali L.	Epilepsy Research	99
1	Early-onset eyelid stereotypies are a frequent and distinctive feature in Dravet syndrome	Article	2021	Sala-Coromina J., Raspall-Chaure M., Marcé-Grau A., de la Ossa A.M., Macaya A.	Seizure	92
34521063	Early-onset eyelid stereotypies are a frequent and distinctive feature in Dravet syndrome（不相关）	Article	2021	Seizure	Seizure	Seizure	Sala-Coromina J
26203087	Effect of vaccinations on seizure risk and disease course in Dravet syndrome	Article	2015	Verbeek N.E., Van Der Maas N.A.T., Sonsma A.C.M., Ippel E., Vermeer-De Bondt P.E., Hagebeuk E., Jansen F.E., Geesink H.H., Braun K.P., De Louw A., Augustijn P.B., Neuteboom R.F., Schieving J.H., Stroink H., Vermeulen R.J., Nicolai J., Brouwer O.F., Van Kempen M., De Kovel C.G.F., Kemmeren J.M., Koeleman B.P.C., Knoers N.V., Lindhout D., Gunning W.B., Brilstra E.H.	Neurology	85
23207687	Effect of vagus nerve stimulation in an adult patient with dravet syndrome: Contribution to sudden unexpected death in epilepsy risk reduction?	Article	European Neurology	69	69	69
20447868	Effects of vaccination on onset and outcome of Dravet syndrome: a retrospective study	Article	2010	McIntosh A.M., McMahon J., Dibbens L.M., Iona X., Mulley J.C., Scheffer I.E., Berkovic S.F.	The Lancet Neurology	9
32945537	Efficacy and safety of Fenfluramine hydrochloride for the treatment of seizures in Dravet syndrome: A real-world study	Article	2020	Specchio N., Pietrafusa N., Doccini V., Trivisano M., Darra F., Ragona F., Cossu A., Spolverato S., Battaglia D., Quintiliani M., Luigia Gambardella M., Rosati A., Mei D., Granata T., Dalla Bernardina B., Vigevano F., Guerrini R.	Epilepsia	61
26183863	Efficacy of antiepileptic drugs for the treatment of Dravet syndrome with different genotypes	Article	2016	Shi X.-Y., Tomonoh Y., Wang W.-Z., Ishii A., Higurashi N., Kurahashi H., Kaneko S., Hirose S., The Epilepsy Genetic Study Group, Japan (Chairperson, SK)	Brain and Development	38
29141279	Efficacy of Stiripentol in Dravet Syndrome with or without SCN1A Mutations	Article	2018	J Clin Neurol	J Clin Neurol	J Clin Neurol	Cho MJ
24113539	Efficacy of verapamil as an adjunctive treatment in children with drug-resistant epilepsy: A pilot study	Article	2014	Nicita F., Spalice A., Papetti L., Nikanorova M., Iannetti P., Parisi P.	Seizure	23
21463281	Electrical and autonomic cardiac function in patients with Dravet syndrome	Article	2011	Delogu A.B., Spinelli A., Battaglia D., Dravet C., De Nisco A., Saracino A., Romagnoli C., Lanza G.A., Crea F.	Epilepsia	52
17565594	Electroclinical features of a family with simple febrile seizures and temporal lobe epilepsy associated with SCN1A loss-of-function mutation	Article	2007	Colosimo E., Gambardella A., Mantegazza M., Labate A., Rusconi R., Schiavon E., Annesi F., Cassulini R.R., Carrideo S., Chifari R., Canevini M.P., Canger R., Franceschetti S., Annesi G., Wanke E., Quattrone A.	Epilepsia	48
22019839	Electroencephalographic features in Dravet syndrome: Five-year follow-up study in 22 patients	Article	2012	Specchio N., Balestri M., Trivisano M., Japaridze N., Striano P., Carotenuto A., Cappelletti S., Specchio L.M., Fusco L., Vigevano F.	Journal of Child Neurology	27
25459968	Electroencephalographic features of patients with SCN1A-positive dravet syndrome	Article	2015	Lee H.-F., Chi C.-S., Tsai C.-R., Chen C.-H., Wang C.-C.	Brain and Development	37
21426328	Encephalopathy and SCN1A mutations	Article	2011	Tang S., Lin J.P., Hughes E., Siddiqui A., Lim M., Lascelles K.	Epilepsia	52
24225340	Encephalopathy in children with Dravet syndrome is not a pure consequence of epilepsy	Article	2013	Nabbout R., Chemaly N., Chipaux M., Barcia G., Bouis C., Dubouch C., Leunen D., Jambaqué I., Dulac O., Dellatolas G., Chiron C.	Orphanet Journal of Rare Diseases	8
1	Epilepsy and febrile seizures in 69 families of Dravet'Syndrome (DS) patients with SCN1A mutation	Article	2005	Gaggero R., Mancardi M.M., Striano P., Zara F.	Bollettino - Lega Italiana contro l'Epilessia
17129991	Epilepsy with a de novo missense mutation in the sodium channel a1 subunit: A case report	Article	2006	Stefanaki E., Aggelakou V., Orfanou M., Kokori E., Boutoufianakis S.	Acta Paediatrica, International Journal of Paediatrics	95
29981888	Establishment of a human induced stem cell line (FUi002-A) from Dravet syndrome patient carrying heterozygous R1525X mutation in SCN1A gene	Article	2018	Tanaka Y., Higurashi N., Shirasu N., Yasunaga S., Moreira K.M., Okano H., Hirose S.	Stem Cell Research	31
26841829	Establishment of isogenic iPSCs from an individual with SCN1A mutation mosaicism as a model for investigating neurocognitive impairment in Dravet syndrome	Article	2016	Maeda H., Chiyonobu T., Yoshida M., Yamashita S., Zuiki M., Kidowaki S., Isoda K., Yamakawa K., Morimoto M., Nakahata T., Saito M.K., Hosoi H.	Journal of Human Genetics	61
21858011	Evaluation of candidate genes from orphan FEB and GEFS+ loci by analysis of human brain gene expression atlases	Article	PLoS ONE	6	6	6
29745119	Expanding spectrum of SCN1A-related phenotype with novel mutations	Article	2017	Hız-Kurul S., Gürsoy S., Ayanoğlu M., Yiş U., Erçal D.	Turkish Journal of Pediatrics	59
17054684	Familial occurrence of febrile seizures and epilepsy in severe myoclonic epilepsy of infancy (SMEI) patients with SCN1A mutations	Article	2006	Margherita Mancardi M., Striano P., Gennaro E., Madia F., Paravidino R., Scapolan S., Dalla Bernardina B., Bertini E., Bianchi A., Capovilla G., Darra F., Elia M., Freri E., Gobbi G., Granata T., Guerrini R., Pantaleoni C., Parmeggiani A., Romeo A., Santucci M., Vecchi M., Veggiotti P., Vigevano F., Pistorio A., Gaggero R., Zara F.	Epilepsia	47
1	Familial SCN1A missense mutation over three generations, from febrile seizures to severe myoclonic epilepsy in infancy	Article	2011	Hofmann C., Baur M.-O., Skladny H.	Journal of Pediatric Neurology	9
12773292	Familial severe myoclonic epilepsy of infancy: Truncation of Nav1.1 and genetic heterogeneity	Article	2003	Gennaro E., Veggiotti P., Malacarne M., Madia F., Cecconi M., Cardinali S., Cassetti A., Cecconi I., Bertini E., Bianchi A., Gobbi G., Zara F.	Epileptic Disorders	5
28330972	Fatal cerebral edema with status epilepticus in children with dravet syndrome: Report of 5 cases	Article	2017	Myers K.A., McMahon J.M., Mandelstam S.A., Mackay M.T., Kalnins R.M., Leventer R.J., Scheffer I.E.	Pediatrics	139
1	Fatal status epilepticus in dravet syndrome	Article	2020	Liso P.D., Pironi V., Mastrangelo M., Battaglia D., Craiu D., Trivisano M., Specchio N., Nabbout R., Vigevano F.	Brain Sciences	10
27197941	Five-year extended follow-up status of 10 patients with Dravet syndrome treated with fenfluramine	Article	2016	Ceulemans B., Schoonjans A.-S., Marchau F., Paelinck B.P., Lagae L.	Epilepsia	57
20110217	Four novel SCN1A mutations in turkish patients with severe myoclonic epilepsy of infancy (SMEI)	Article	2010	Arlier Z., Bayri Y., Kolb L.E., Erturk O., Ozturk A.K., Bayrakli F., Bilguvar K., Moliterno J.A., Dervent A., Demirbilek V., Yalcinkaya C., Korkmaz B., Tuysuz B., Gunel M.	Journal of Child Neurology	25
11940708	Frequent mutations of SCN1A in severe myoclonic epilepsy in infancy	Article	2002	Sugawara T., Mazaki-Miyazaki E., Fukushima K., Shimomura J., Fujiwara T., Hamano S., Inoue Y., Yamakawa K.	Neurology	58
26188943	From focal epilepsy to dravet syndrome –heterogeneity of the phenotype due to SCN1A mutations of the p.Arg1596 amino acid residue in the nav1.1 subunit	Article	2015	Hoffman-Zacharska D., Szczepanik E., Terczynska I., Goszczanska-Ciuchta A., Zalewska-Miszkurka Z., Tataj R., Bal J.	Neurologia i Neurochirurgia Polska	49
24623842	GABRA1 and STXBP1: Novel genetic causes of Dravet syndrome	Article	2014	Carvill G.L., Weckhuysen S., McMahon J.M., Hartmann C., Møller R.S., Hjalgrim H., Cook J., Geraghty E., O'Roak B.J., Petrou S., Clarke A., Gill D., Sadleir L.G., Muhle H., Von Spiczak S., Nikanorova M., Hodgson B.L., Gazina E.V., Suls A., Shendure J., Dibbens L.M., De Jonghe P., Helbig I., Berkovic S.F., Scheffer I.E., Mefford H.C.	Neurology	82
31582194	Gait abnormalities in people with Dravet syndrome: A cross-sectional multi-center study	Article	2019	Di Marco R., Hallemans A., Bellon G., Ragona F., Piazza E., Granata T., Ceulemans B., Schoonjans A.-S., Van de Walle P., Darra F., Dalla Bernardina B., Vecchi M., Sawacha Z., Scarpa B., Masiero S., Benedetti M.G., Del Felice A.	European Journal of Paediatric Neurology	23
34163418	Gene and Phenotype Expansion of Unexplained Early Infantile Epileptic Encephalopathy	Article	2021	Front Neurol	Front Neurol	Front Neurol	Liu X
27781031	Gene Panel Testing in Epileptic Encephalopathies and Familial Epilepsies	Article	2016	Mol Syndromol	Mol Syndromol	Mol Syndromol	M?ller RS
21335542	Generalized periodic epileptiform discharges in a child with Dravet syndrome	Article	2011	Moseley B.D., Wirrell E.C., Nickels K.	Journal of Child Neurology	26
1	Genetic analysis of 5'-untranslated region of voltage-gated sodium channel alpha 1-subunit gene in Dravet syndrome	Article	2010	Lin S.-P., Long Y.-S., Shi Y.-W., Liu X.-R., Chen L., Yu M.-J., Liao W.-P.	Chinese Journal of Neurology	43
23225037	Genetic and phenotypic characteristics of SCN1A mutations in Dravet syndrome	Article	2012	Xu X.-J., Zhang Y.-H., Sun H.-H., Liu X.-Y., Jiang Y.-W., Wu X.-R.	Chinese Journal of Medical Genetics	29
34568804	Genetic cause of epilepsy in a Greek cohort of children and young adults with heterogeneous epilepsy syndromes	Article	2021	Epilepsy Behav Rep	Epilepsy Behav Rep	Epilepsy Behav Rep	Zaganas I
1	Genetic characteristics of SCNIA gene in familial severe myoclonic epilepsy in infancy	Article	2009	Mai Y.-Z., Liu X.-R., Shi Y.-W., Deng W.-Y., Yu M.-J., Chen L., Chang H.-H., Liao W.-P.	Chinese Journal of Neurology	42
33067208	Genetic Diagnosis of Dravet Syndrome Using Next Generation Sequencing-Based Epilepsy Gene Panel Testing	Article	2020	Lee J., Lee C., Park W.-Y., Lee J.	Annals of clinical and laboratory science	50
22147323	Genetic diagnosis of severe myoclonic epilepsy of infancy (Dravet syndrome) with SCN1A mutations in the Hong Kong Chinese patients	Article	2011	Mak C.M., Chan K.Y., Yau E.K.C., Chen S.P.L., Siu W.K., Law C.Y., Lam C.W., Chan A.Y.W.	Hong Kong Medical Journal	17
33902251	Genetics Analysis of patients with Dravet syndrome due to mosaicism variation of paternal SCN1A gene	Article	2021	Huo M., Niu W., Xu J., Shi H., Liu Y., Zhang Y.	National Medical Journal of China	101
34226156	Genetics and clinical correlation of Dravet syndrome and its mimics – experience of a tertiary center in Taiwan	Article	2021	Liu Y.-H., Cheng Y.-T., Tsai M.-H., Chou I.-J., Hung P.-C., Hsieh M.-Y., Wang Y.-S., Chen Y.-J., Kuo C.-Y., Lin J.-J., Wang H.-S., Lin K.-L.	Pediatrics and Neonatology	62
34145886	Genome sequencing of 320 Chinese children with epilepsy: a clinical and molecular study	Article	2021	Brain	Brain	Brain	Zou D
29142202	Genomic mosaicism in paternal sperm and multiple parental tissues in a Dravet syndrome cohort	Article	2017	Yang X., Liu A., Xu X., Yang X., Zeng Q., Ye A.Y., Yu Z., Wang S., Huang A.Y., Wu X., Wu Q., Wei L., Zhang Y.	Scientific Reports	7
21248271	Genotype-phenotype associations in SCN1A-related epilepsies	Article	2011	Neurology	Neurology	Neurology	Zuberi SM
32593896	Genotype-phenotype correlates of infantile-onset developmental & epileptic encephalopathy syndromes in South India: A single centre experience	Article	2020	Mitta N., Menon R.N., McTague A., Radhakrishnan A., Sundaram S., Cherian A., Madhavilatha G.K., Mannan A.U., Nampoothiri S., Thomas S.V.	Epilepsy Research	166
29031192	Growth and endocrine function in children with Dravet syndrome	Article	2017	Eschbach K., Scarbro S., Juarez-Colunga E., Allen V., Hsu S., Knupp K.	Seizure	52
19563349	Hemiconvulsion-hemiplegia syndrome in a patient with severe myoclonic epilepsy in infancy	Article	2009	Sakakibara T., Nakagawa E., Saito Y., Sakuma H., Komaki H., Sugai K., Sasaki M., Kurahashi H., Hirose S.	Epilepsia	50
34379890	High FGF-21 level in a cohort of 22 patients with Dravet Syndrome—Possible relationship with the disease outcomes	Article	2021	Kwong A.K.-Y., Wong V.C.-N., Wong S.S.-N., Chu V.L.-Y., Koene S., Smeitink J., Fung C.-W.	Epilepsia Open
25795284	Homozygous mutations in the SCN1A gene associated with genetic epilepsy with febrile seizures plus and Dravet syndrome in 2 families	Article	2015	Brunklaus A., Ellis R., Stewart H., Aylett S., Reavey E., Jefferson R., Jain R., Chakraborty S., Jayawant S., Zuberi S.M.	European Journal of Paediatric Neurology	19
23034800	Human herpesvirus 6-associated encephalopathy in a child with dravet syndrome	Article	2013	Hiraiwa-Sofue A., Ito Y., Ohta R., Kimura H., Okumura A.	Neuropediatrics	44
25046982	Ictal ontogeny in Dravet syndrome	Article	2015	Kim S.H., Nordli D.R., Berg A.T., Koh S., Laux L.	Clinical Neurophysiology	126
22848613	Identification of SCN1A and PCDH19 mutations in Chinese children with Dravet syndrome	Article	2012	Kwong A.K.-Y., Fung C.-W., Chan S.-Y., Wong V.C.-N.	PLoS ONE	7
32375095	Impact of childhood Dravet syndrome on care givers of patients with DS, a major impact on mothers	Article	2020	Nabbout R., Dirani M., Teng T., Bianic F., Martin M., Holland R., Chemaly N., Coque N.	Epilepsy and Behavior	108
28356460	Impaired intracortical inhibition demonstrated in vivo in people with Dravet syndrome	Article	2017	Stern W.M., Sander J.W., Rothwell J.C., Sisodiya S.M.	Neurology	88
30735520	In vivo, in vitro and in silico correlations of four de novo SCN1A missense mutations	Article	2019	Nissenkorn A., Almog Y., Adler I., Safrin M., Brusel M., Marom M., Bercovich S., Yakubovich D., Tzadok M., Ben-Zeev B., Rubinstein M.	PLoS ONE	14
29750338	Influence of contraindicated medication use on cognitive outcome in Dravet syndrome and age at first afebrile seizure as a clinical predictor in SCN1A-related seizure phenotypes	Article	2018	de Lange I.M., Gunning B., Sonsma A.C.M., van Gemert L., van Kempen M., Verbeek N.E., Nicolai J., Knoers N.V.A.M., Koeleman B.P.C., Brilstra E.H.	Epilepsia	59
13129592	Is phenotype difference in severe myoclonic epilepsy in infancy related to SCN1A mutations?	Article	2003	Ohmori I., Ohtsuka Y., Ouchida M., Ogino T., Maniwa S., Shimizu K., Oka E.	Brain and Development	25
34268891	Late diagnoses of Dravet syndrome: How many individuals are we missing?	Article	2021	Epilepsia Open	Epilepsia Open	Epilepsia Open	Silvennoinen K
30870727	Longitudinal change of cardiac electrical and autonomic function and potential risk factors in children with dravet syndrome	Article	2019	Lyu S.Y., Nam S.O., Lee Y.-J., Kim G., Kim Y.A., Kong J., Ko A., Kim Y.M., Yeon G.M.	Epilepsy Research	152
34692895	Long-term Efficacy of Perampanel in a Child with Dravet Syndrome	Article	2021	Child Neurol Open	Child Neurol Open	Child Neurol Open	Turón-Vi?as E
23916143	Low incidence of SCN1A genetic mutation in patients with hemiconvulsion-hemiplegia-epilepsy syndrome	Article	2013	Kim D.W., Lim B.C., Kim K.J., Chae J.H., Lee R., Lee S.K.	Epilepsy Research	106
21620771	Low long-term efficacy and tolerability of add-on rufinamide in patients with Dravet syndrome	Article	2011	Mueller A., Boor R., Coppola G., Striano P., Dahlin M., von Stuelpnagel C., Lotte J., Staudt M., Kluger G.	Epilepsy and Behavior	21
29265387	Marked efficacy of combined three-drug therapy (Sodium Valproate, Topiramate and Stiripentol) in a patient with Dravet syndrome	Article	Journal of Clinical Pharmacy and Therapeutics	43	43	43
20522430	Mechanisms for variable expressivity of inherited SCN1A mutations causing Dravet syndrome	Article	2010	Depienne C., Trouillard O., Gourfinkel-An I., Saint-Martin C., Bouteiller D., Graber D., Barthez-Carpentier M.-A., Gautier A., Villeneuve N., Dravet C., Livet M.-O., Rivier-Ringenbach C., Adam C., Dupont S., Baulac S., Héron D., Nabbout R., LeGuern E.	Journal of Medical Genetics	47
18479393	Microchromosomal deletions involving SCN1A and adjacent genes in severe myoclonic epilepsy in infancy	Article	2008	Wang J.-W., Kurahashi H., Ishii A., Kojima T., Ohfu M., Inoue T., Ogawa A., Yasumoto S., Oguni H., Kure S., Fujii T., Ito M., Okuno T., Shirasaka Y., Natsume J., Hasegawa A., Konagaya A., Kaneko S., Hirose S.	Epilepsia	49
23485646	Molecular aspects of Dravet syndrome patients in Taiwan	Article	2013	Lin W.-D., Chang K.-P., Wang C.-H., Chen S.-J., Fan P.-C., Weng W.-C., Lin W.-C., Tsai Y., Tsai C.-H., Chou I.-C., Tsai F.-J.	Clinica Chimica Acta	421
32702657	Molecular diagnosis of epileptic encephalopathy of the first year of life applying a customized gene panel in a group of Argentinean patients	Article	2020	Juanes M., Veneruzzo G., Loos M., Reyes G., Araoz H.V., Garcia F.M., Gomez G., Alonso C.N., Chertkoff L.P., Caraballo R.	Epilepsy and Behavior	111
18639757	Monozygotic twins with severe myoclonic epilepsy in infancy discordant for clinical features	Article	2008	Pediatr Neurol	Pediatr Neurol	Pediatr Neurol	Miyama S
17054697	Mosaic SCN1A mutation in familial severe myoclonic epilepsy of infancy	Article	2006	Marini C., Mei D., Helen Cross J., Guerrini R.	Epilepsia	47
20562086	Mosaicism of a missense SCN1A mutation and Dravet syndrome in a Roma/Gypsy family	Article	2010	Azmanov D.N., Zhelyazkova S., Dimova P.S., Radionova M., Bojinova V., Florez L., Smith S.J., Tournev I., Jablensky A., Mulley J., Scheffer I., Kalaydjieva L., Sander J.W.	Epileptic Disorders	12
29460957	Mosaicism of de novo pathogenic SCN1A variants in epilepsy is a frequent phenomenon that correlates with variable phenotypes	Article	2018	de Lange I.M., Koudijs M.J., van 't Slot R., Gunning B., Sonsma A.C.M., van Gemert L.J.J.M., Mulder F., Carbo E.C., van Kempen M.J.A., Verbeek N.E., Nijman I.J., Ernst R.F., Savelberg S.M.C., Knoers N.V.A.M., Brilstra E.H., Koeleman B.P.C.	Epilepsia	59
27316242	Motor neuropathy contributes to crouching in patients with Dravet syndrome	Article	2016	Gitiaux C., Chemaly N., Quijano-Roy S., Barnerias C., Desguerre I., Hully M., Chiron C., Dulac O., Nabbout R.	Neurology	87
28126647	Movement-activated cortical myoclonus in Dravet syndrome	Article	2017	Canafoglia L., Ragona F., Panzica F., Piazza E., Freri E., Binelli S., Scaioli V., Avanzini G., Granata T., Franceschetti S.	Epilepsy Research	130
33478845	Multicenter prospective longitudinal study in 34 patients with Dravet syndrome: Neuropsychological development in the first six years of life	Article	2021	Battaglia D., Chieffo D., Lucibello S., Marini C., Sibilia V., Mei D., Darra F., Offredi F., Fontana E., Specchio N., Cappelletti S., Granata T., Ragona F., Patrini M., Baglietto M.G., Prato G., Ferrari A., Vigevano F., Mercuri E., Bernardina B.D., Guerrini R., Dravet C., Guzzetta F.	Brain and Development	43
26802095	Multiplex families with epilepsy: Success of clinical and molecular genetic characterization	Article	2016	Afawi Z., Oliver K.L., Kivity S., Mazarib A., Blatt I., Neufeld M.Y., Helbig K.L., Goldberg-Stern H., Misk A.J., Straussberg R., Walid S., Mahajnah M., Lerman-Sagie T., Ben-Zeev B., Kahana E., Masalha R., Kramer U., Ekstein D., Shorer Z., Wallace R.H., Mangelsdorf M., MacPherson J.N., Carvill G.L., Mefford H.C., Jackson G.D., Scheffer I.E., Bahlo M., Gecz J., Heron S.E., Corbett M., Mulley J.C., …	Neurology	86
23517304	Musicogenic seizures in dravet syndrome	Article	2013	Sanchez-Carpintero R., Patiño-Garcia A., Urrestarazu E.	Developmental Medicine and Child Neurology	55
19350499	Mutation analysis of the SCN1A gene in severe myoclonic epilepsy of infancy	Article	2009	Sun H.-H., Zhang Y.-H., Liu X.-Y., Ma X.-W., Wu H.-S., Xu K.-M., Qin J., Qi Y., Wu X.-R.	Chinese Journal of Medical Genetics	26
1	Mutation screening of SCN1A 3' untranslated region on Dravet syndrome patients and functional analysis of the variant	Article	2017	Zeng T., Xiao X., Min F., Chen S., Li Z., Pan X., Zhou J., Long Y., Liao W.	Chinese Journal of Neurology	50
31765958	Mutation spectrum of the SCN1A gene in a Hungarian population with epilepsy	Article	2020	Till Á., Zima J., Fekete A., Bene J., Czakó M., Szabó A., Melegh B., Hadzsiev K.	Seizure	74
19522081	Mutational analysis of the SCN1A, SCN1B and GABRG2 genes in 150 Italian patients with idiopathic childhood epilepsies	Letter	2009	Orrico A., Galli L., Grosso S., Buoni S., Pianigiani R., Balestri P., Sorrentino D.	Clinical Genetics	75
14738421	Mutations of Neuronal Voltage-gated Na+ Channel α1 Subunit Gene SCN1A in Core Severe Myoclonic Epilepsy in Infancy (SMEI) and in Borderline SMEI (SMEB)	Article	2004	Fukuma G., Oguni H., Shirasaka Y., Watanabe K., Miyajima T., Yasumoto S., Ohfu M., Inoue T., Watanachai A., Kira R., Matsuo M., Muranaka H., Sofue F., Zhang B., Kaneko S., Mitsudome A., Hirose S.	Epilepsia	45
12566275	Mutations of sodium channel α subunit type 1 (SCN1A) in intractable childhood epilepsies with frequent generalized tonic-clonic seizures	Article	2003	Fujiwara T., Sugawara T., Mazaki-Miyazaki E., Takahashi Y., Fukushima K., Watanabe M., Hara K., Morikawa T., Yagi K., Yamakawa K., Inoue Y.	Brain	126
28233668	Myoclonic Absence Seizures in Dravet Syndrome	Article	2017	Myers K.A., Scheffer I.E.	Pediatric Neurology	70
21474289	Neuropsychological development in children with Dravet syndrome	Article	2011	Epilepsy Res	Epilepsy Res	Epilepsy Res	Chieffo D
20135149	Novel human pathological mutations. Gene symbol: SCN1A. Disease: Myoclonic epilepsy of infancy	Article	2010	Hum Genet	Hum Genet	Hum Genet	Rocca FE
19694011	Novel human pathological mutations. Gene symbol: SCN1A. Disease: severe myoclonic epilepsy of infancy.	Article	2009	Provenzano G., Mannarino E., Annesi F., De Marco E.V., Rocca F.E., Greco V., Scornaienchi V., Tarantino P., Civitelli D., Quattrone A., Tortorella G., Annesi G.	Human genetics	126
20600615	Novel mutation of SCN1A in familial generalized epilepsy with febrile seizures plus	Article	2010	Li N., Zhang J., Guo J.-F., Yan X.-X., Xia K., Tang B.-S.	Neuroscience Letters	480
29314583	Novel mutations and phenotypes of epilepsy-associated genes in epileptic encephalopathies	Article	2018	Zhou P., He N., Zhang J.-W., Lin Z.-J., Wang J., Yan L.-M., Meng H., Tang B., Li B.-M., Liu X.-R., Shi Y.-W., Zhai Q.-X., Yi Y.-H., Liao W.-P.	Genes, Brain and Behavior	17
28540321	Novel SCN1A and GABRA1 Gene Mutations With Diverse Phenotypic Features and the Question on the Existence of a Broader Spectrum of Dravet Syndrome	Article	2017	Child Neurol Open	Child Neurol Open	Child Neurol Open	Gontika MP
18680191	Novel SCN1A frameshift mutation with absence of truncated Nav1.1 protein in severe myoclonic epilepsy of infancy	Letter	2008	McArdle E.J., Kunic J.D., George Jr. A.L.	American Journal of Medical Genetics, Part A	146
1	Novel SCN1A mutation causing Dravet syndrome: Case report and review of the literature	Article	2011	Strader S., Benson R., Joshi C.	Journal of Pediatric Neurology	9
19563458	Novel SCN1A mutations in Indonesian patients with severe myoclonic epilepsy in infancy	Article	2010	Herini E.S., Gunadi, Van Kempen M.J.A., Yusoff S., Sutaryo, Sunartini, Patria S.Y., Matsuo M., Lindhout D., Nishio H.	Pediatrics International	52
27045673	Novel SCN1A variants in Dravet syndrome and evaluating a wide approach of patient selection	Article	2016	Surovy M., Soltysova A., Kolnikova M., Sykora P., Ilencikova D., Ficek A., Radvanszky J., Kadasi L.	General Physiology and Biophysics	35
22206733	On the likelihood of SCN1A microdeletions or duplications in Dravet syndrome with missense mutation	Article	2012	Shi X., Wang J., Kurahashi H., Ishii A., Higurashi N., Kaneko S., Hirose S.	Brain and Development	34
30527252	Outcomes and comorbidities of SCN1A-related seizure disorders	Article	2019	de Lange I.M., Gunning B., Sonsma A.C.M., van Gemert L., van Kempen M., Verbeek N.E., Sinoo C., Nicolai J., Knoers N.V.A.M., Koeleman B.P.C., Brilstra E.H.	Epilepsy and Behavior	90
16541393	Parental mosaicism can cause recurrent transmission of SCN1A mutations associated with severe myoclonic epilepsy of infancy.	Article	2006	Depienne C., Arzimanoglou A., Trouillard O., Fedirko E., Baulac S., Saint-Martin C., Ruberg M., Dravet C., Nabbout R., Baulac M., Gourfinkel-An I., LeGuern E.	Human mutation	27
27021235	Parental mosaicism in another case of Dravet syndrome caused by a novel SCN1A deletion: A case report	Article	2016	Sharkia R., Hengel H., Schöls L., Athamna M., Bauer P., Mahajnah M.	Journal of Medical Case Reports	10
28982531	Parental Perception of Comorbidities in Children With Dravet Syndrome	Article	2017	Knupp K.G., Scarbro S., Wilkening G., Juarez-Colunga E., Kempe A., Dempsey A.	Pediatric Neurology	76
19673951	Parental SCN1A mutation mosaicism in familial Dravet syndrome	Article	2009	Selmer K.K., Eriksson A.S., Brandal K., Egeland T., Tallaksen C., Undlien D.E.	Clinical Genetics	76
12907273	Paroxysmal movement disorders in severe myoclonic epilepsy in infancy	Article	2003	Ohtsuka Y., Ohmori I., Ogino T., Ouchida M., Shimizu K., Oka E.	Brain and Development	25
29408779	Pathogenic significance of SCN1A splicing variants causing Dravet syndrome: Improving diagnosis with targeted sequencing for variants by in silico analysis	Article	2018	Mahdieh N., Mikaeeli S., Badv R.S., Shirazi A.G., Maleki M., Rabbani B.	Clinical Neurology and Neurosurgery	166
27389706	Patients with dravet syndrome in the era of stiripentol: A French cohort cross-sectional study	Article（排除）	2016	De Liso P., Chemaly N., Laschet J., Barnerias C., Hully M., Leunen D., Desguerre I., Chiron C., Dulac O., Nabbout R.	Epilepsy Research	125
28042998	Photosensitivity in Dravet syndrome is under-recognized and related to prognosis	Article	2017	Verbeek N., Kasteleijn-Nolst Trenité D., Wassenaar M., van Campen J., Sonsma A., Gunning W.B., de Weerd A., Knoers N., Spetgens W., Gutter T., Leijten F., Brilstra E.	Clinical Neurophysiology	128
27465585	Pitfalls in genetic testing: the story of missed SCN1A mutations	Article	2016	Mol Genet Genomic Med	Mol Genet Genomic Med	Mol Genet Genomic Med	Djémié T
26995069	Prevalence and Characteristics of Vaccination Triggered Seizures in Dravet Syndrome in Hong Kong: A Retrospective Study	Article	2016	Wong P.T.Y., Wong V.C.-N.	Pediatric Neurology	58
23195492	Prevalence of SCN1A mutations in children with suspected Dravet syndrome and intractable childhood epilepsy	Article	2012	Wang J.-W., Shi X.-Y., Kurahashi H., Hwang S.-K., Ishii A., Higurashi N., Kaneko S., Hirose S.	Epilepsy Research	102
23762420	Prevalence of SCN1A-Related Dravet Syndrome among Children Reported with Seizures following Vaccination: A Population-Based Ten-Year Cohort Study	Article	2013	Verbeek N.E., van der Maas N.A.T., Jansen F.E., van Kempen M.J.A., Lindhout D., Brilstra E.H.	PLoS ONE	8
1	Prognosis and follow-up study of 670 pediatric patients with Dravet syndrome [Dravet综合征670例患儿预后随访研究]	Article	2020	Tian X., Zhang Y., Xu X., Yang X., Liu A., Zeng Q., Zhang J., Yang Y., Jiang Y.	Chinese Journal of Applied Clinical Pediatrics	35
22719002	Prognostic, clinical and demographic features in SCN1A mutation-positive Dravet syndrome	Article	2012	Brain	Brain	Brain	Brunklaus A
22409937	Progressive gait deterioration in adolescents with Dravet syndrome	Article	2012	Rodda J.M., Scheffer I.E., McMahon J.M., Berkovic S.F., Graham H.K.	Archives of Neurology	69
29990707	Prospective study of the efficacy of a ketogenic diet in 20 patients with Dravet syndrome	Article	2018	Yan N., Xin-Hua W., Lin-Mei Z., Yi-Ming C., Wen-Hui L., Yuan-Feng Z., Shui-Zhen Z.	Seizure	60
23065439	QT and P wave dispersion and heart rate variability in patients with Dravet syndrome	Article	2013	Acta Neurol Belg	Acta Neurol Belg	Acta Neurol Belg	Ergul Y
30353809	Randomized controlled trial of melatonin for sleep disturbance in dravet syndrome: The DREAMS study	Article	2018	Myers K.A., Davey M.J., Ching M., Ellis C., Grinton B.E., Roten A., Lightfoot P.A., Scheffer I.E.	Journal of Clinical Sleep Medicine	14
28686619	Rare variants of small effect size in neuronal excitability genes influence clinical outcome in Japanese cases of SCN1A truncation-positive Dravet syndrome	Article	2017	Hammer M.F., Ishii A., Johnstone L., Tchourbanov A., Lau B., Sprissler R., Hallmark B., Zhang M., Zhou J., Watkins J., Hirose S.	PLoS ONE	12
18031552	Rasmussen encephalitis associated with SCN1A mutation	Article	2008	Ohmori I., Ouchida M., Kobayashi K., Jitsumori Y., Inoue T., Shimizu K., Matsui H., Ohtsuka Y., Maegaki Y.	Epilepsia	49
31814998	Re-annotation of 191 developmental and epileptic encephalopathy-associated genes unmasks de novo variants in SCN1A	Article	2019	NPJ Genom Med	NPJ Genom Med	NPJ Genom Med	Steward CA
16458823	Recurrent de novo mutations of SCN1A in severe myoclonic epilepsy of infancy	Article	2006	Kearney J.A., Wiste A.K., Stephani U., Trudeau M.M., Siegel A., Ramachandrannair R., Elterman R.D., Muhle H., Reinsdorf J., Shields W.D., Meisler M.H., Escayg A.	Pediatric Neurology	34
26889571	Reflex Seizures Triggered by Diaper Change in Dravet Syndrome	Article	2016	Subki A.H., Alasmari A.S., Jan F.M., Moria F.A., Jan M.M.	Canadian Journal of Neurological Sciences	43
18275929	Refractory, life-threatening status epilepticus in a 3-year-old girl	Article	2008	Lancet Neurol	Lancet Neurol	Lancet Neurol	Striano P
21480880	Retrospective multiinstitutional study of the prevalence of early death in Dravet syndrome	Article	2011	Sakauchi M., Oguni H., Kato I., Osawa M., Hirose S., Kaneko S., Takahashi Y., Takayama R., Fujiwara T.	Epilepsia	52
16505326	SCN1A (2528delG) novel truncating mutation with benign outcome of severe myoclonic epilepsy of infancy	Article	2006	Buoni S., Orrico A., Galli L., Zannolli R., Burroni L., Hayek J., Fois A., Sorrentino V.	Neurology	66
19400878	SCN1A duplications and deletions detected in Dravet syndrome: Implications for molecular diagnosis	Article	2009	Marini C., Scheffer I.E., Nabbout R., Mei D., Cox K., Dibbens L.M., McMahon J.M., Iona X., Carpintero R.S., Elia M., Cilio M.R., Specchio N., Giordano L., Striano P., Gennaro E., Cross J.H., Kivity S., Neufeld M.Y., Afawi Z., Andermann E., Keene D., Dulac O., Zara F., Berkovic S.F., Guerrini R., Mulley J.C.	Epilepsia	50
30779207	SCN1A gain of function in early infantile encephalopathy	Article	2019	Berecki G., Bryson A., Terhag J., Maljevic S., Gazina E.V., Hill S.L., Petrou S.	Annals of Neurology	85
28079314	SCN1A Gene Mutation and Adaptive Functioning in 18 Vietnamese Children with Dravet Syndrome	Article	2017	J Clin Neurol	J Clin Neurol	J Clin Neurol	Do TT
27236449	SCN1A gene sequencing in 46 Turkish epilepsy patients disclosed 12 novel mutations	Article	2016	Usluer S., Salar S., Arslan M., Yiş U., Kara B., Tektürk P., Baykan B., Meral C., Türkdoǧan D., Bebek N., Yalçin Çapan Ö., Gündoǧdu Eken A., Çaǧlayan S.H.	Seizure	39
1	SCN1A Genetic Test for Dravet Syndrome (Severe Myoclonic Epilepsy of Infancy and its Clinical Subtypes) for use in the Diagnosis, Prognosis, Treatment and Management of Dravet Syndrome	Article	2013	Stenhouse S.A.R., Ellis R., Zuberi S.	PLoS Currents
15944908	SCN1A mutation analysis in myoclonic astatic epilepsy and severe idiopathic generalized epilepsy of infancy with generalized tonic-clonic seizures	Article	2005	Ebach K., Joos H., Doose H., Stephani U., Kurlemann G., Fiedler B., Hahn A., Hauser E., Hundt K., Holthausen H., Müller U., Neubauer B.A.	Neuropediatrics	36
17679682	SCN1A mutation associated with atypical panayiotopoulos syndrome	Article	2007	Grosso S., Orrico A., Galli L., Di Bartolo R., Sorrentino V., Balestri P.	Neurology	69
17054696	SCN1A mutation mosaicism in a family with severe myoclonic epilepsy in infancy	Article	2006	Morimoto M., Mazaki E., Nishimura A., Chiyonobu T., Sawai Y., Murakami A., Nakamura K., Inoue I., Ogiwara I., Sugimoto T., Yamakawa K.	Epilepsia	47
1	SCN1A mutation positive Dravet syndrome, genetic aspects and clinical experiences [Syndróm Dravetovej s mutáciou v SCN1A géne, genetické aspekty a klinické skúsenosti]	Article	2018	Ceská K., Aulická Š., Danhofer P., Horák O., Fajkusová L., Pouchlá S., Ošlejšková H.	Ceska a Slovenska Neurologie a Neurochirurgie	81
23586701	SCN1A testing for epilepsy: Application in clinical practice	Article	2013	Hirose S., Scheffer I.E., Marini C., De Jonghe P., Andermann E., Goldman A.M., Kauffman M., Tan N.C.K., Lowenstein D.H., Sisodiya S.M., Ottman R., Berkovic S.F.	Epilepsia	54
30921204	SCN1B and SCN2B gene variants analysis in dravet syndrome patients Analysis of 22 cases	Article	2019	Gong J.-E., Liao H.-M., Long H.-Y., Li X.-M., Long L.-L., Zhou L., Gu W.-P., Lu S.-H., Qu Q., Yang L.-M., Xiao B., Qu J.	Medicine (United States)	98
25667824	Seizure control in a patient with Dravet syndrome and cystic fibrosis	Article	2013	Epilepsy Behav Case Rep	Epilepsy Behav Case Rep	Epilepsy Behav Case Rep	Schmalbach B
29571173	Seizure Freedom in Patients with Dravet Syndrome with Contraceptives: A Case Report with Two Patients	Article	Neuropediatrics	49	49	49
26021464	Seizure precipitants in Dravet syndrome: What events and activities are specifically provocative compared with other epilepsies?	Article	2015	Verbeek N.E., Wassenaar M., van Campen J.S., Sonsma A., Gunning B., Knoers N., Lindhout D., Jansen F.E., Leijten F., Brilstra E.H., Kasteleijn-Nolst Trenité D.	Epilepsy and Behavior	47
1	Seizure reduction with fluoxetine in an adult woman with Dravet syndrome	Article	2014	Meador K.J.	Epilepsy and Behavior Case Reports	2
1	Severe myoclonic epilepsy in infancy - Adult phenotype with bradykinesia, hypomimia, and perseverative behavior: Report of five cases	Article	2011	Martin P., Rautenstrau B., Abicht A., Fahrbach J., Koster S.	Molecular Syndromology	1
15526956	Severe myoclonic epilepsy in infancy: Toward an optimal treatment	Article	2004	Ceulemans B., Boel M., Claes L., Dom L., Willekens H., Thiry P., Lagae L., Eiken D.	Journal of Child Neurology	19
22028529	Severe myoclonic epilepsy of infancy (Dravet syndrome): Clinical and genetic features of nine Turkish patients	Article	2011	Ann Indian Acad Neurol	Ann Indian Acad Neurol	Ann Indian Acad Neurol	Ozmen M
17190949	Severe myoclonic epilepsy of infancy (Dravet syndrome): Recognition and diagnosis in adults	Article	2006	Jansen F.E., Sadleir L.G., Harkin L.A., Vadlamudi L., McMahon J.M., Mulley J.C., Scheffer I.E., Berkovic S.F.	Neurology	67
1	Severe myoclonic epilepsy of infancy: Seizure reduction during adjunctive eslicarbazepine in two cases	Article	2015	Buoni S., Geronzi U., Orsi A., Hayek Y.	Epilepsy and Behavior Case Reports	4
17105460	Severe myoclonic epilepsy of infants (Dravet syndrome): Natural history and neuropsychological findings	Article	2006	Wolff M., Cassé-Perrot C., Dravet C.	Epilepsia	47
29329111	Severe peri-ictal respiratory dysfunction is common in Dravet syndrome	Article	2018	Kim Y., Bravo E., Thirnbeck C.K., Smith-Mellecker L.A., Kim S.H., Gehlbach B.K., Laux L.C., Zhou X., Nordli D.R., Jr., Richerson G.B.	Journal of Clinical Investigation	128
20630778	Short communication milder phenotype with SCN1A truncation mutation other than SMEI	Article	2010	Yu M.-J., Shi Y.-W., Gao M.-M., Deng W.-Y., Liu X.-R., Chen L., Long Y.-S., Yi Y.-H., Liao W.-P.	Seizure	19
12083760	Significant correlation of the SCN1A mutations and severe myoclonic epilepsy in infancy	Article	2002	Ohmori I., Ouchida M., Ohtsuka Y., Oka E., Shimizu K.	Biochemical and Biophysical Research Communications	295
24656210	Sleep abnormalities in children with dravet syndrome	Article	2014	Dhamija R., Erickson M.K., St Louis E.K., Wirrell E., Kotagal S.	Pediatric Neurology	50
24665294	Sodium Channel Gene Mutations in Children with GEFS+ and Dravet Syndrome: A Cross Sectional Study	Article	2013	Iran J Child Neurol	Iran J Child Neurol	Iran J Child Neurol	TONEKABONI SH
16430863	Somatic and germline mosaicisms in Severe Myoclonic Epilepsy of Infancy	Article	2006	Gennaro E., Santorelli F.M., Bertini E., Buti D., Gaggero R., Gobbi G., Lini M., Granata T., Freri E., Parmeggiani A., Striano P., Veggiotti P., Cardinali S., Bricarelli F.D., Minetti C., Zara F.	Biochemical and Biophysical Research Communications	341
29341473	Somatic mosaic deletions involving SCN1A cause Dravet syndrome	Article	2018	Nakayama T., Ishii A., Yoshida T., Nasu H., Shimojima K., Yamamoto T., Kure S., Hirose S.	American Journal of Medical Genetics, Part A	176
27889818	Somatosensory reflex seizures in a child with epilepsy related to novel SCN1A mutation	Article	2017	Arican P., Dundar N.O., Cavusoglu D., Ozdemır T.R., Gencpinar P.	Child's Nervous System	33
18930999	Spectrum of SCN1A gene mutations associated with Dravet syndrome: Analysis of 333 patients	Article	2009	Depienne C., Trouillard O., Saint-Martin C., Gourfinkel-An I., Bouteiller D., Carpentier W., Keren B., Abert B., Gautier A., Baulac S., Arzimanoglou A., Cazeneuve C., Nabbout R., LeGuern E.	Journal of Medical Genetics	46
12821740	Spectrum of SCN1A mutations in severe myoclonic epilepsy of infancy	Article	2003	Nabbout R., Gennaro E., Dalla Bernardina B., Dulac O., Madia F., Bertini E., Capovilla G., Chiron C., Cristofori G., Elia M., Fontana E., Gaggero R., Granata T., Guerrini R., Loi M., La Selva L., Lispi M.L., Matricardi A., Romeo A., Tzolas V., Valseriati D., Veggiotti P., Vigevano F., Vallée L., Dagna Bricarelli F., Bianchi A., Zara F.	Neurology	60
33084037	Starting stiripentol in adults with Dravet syndrome? Watch for ammonia and carnitine	Article	2020	Zulfiqar Ali Q., Marques P., Selvarajah A., Tabarestani S., Sadoway T., Andrade D.M.	Epilepsia	61
29473155	Stiripentol efficacy and safety in Dravet syndrome: a 12-year observational study	Article	2018	Myers K.A., Lightfoot P., Patil S.G., Cross J.H., Scheffer I.E.	Developmental Medicine and Child Neurology	60
30900478	Stiripentol for the treatment of seizures associated with Dravet syndrome	Article	2019	Chiron C.	Expert Review of Neurotherapeutics	19
31176277	Successful treatment of intractable life-threatening seizures with perampanel in the first case of early myoclonic encephalopathy with a novel de novo SCN1A mutation	Article	2019	Ishikawa N., Tateishi Y., Tani H., Kobayashi Y., Itai T., Miyatake S., Kato M., Matsumoto N., Kobayashi M.	Seizure	71
22554283	Successful use of fenfluramine as an add-on treatment for Dravet syndrome	Article	Epilepsia	53	53	53
32167579	Successful use of fenfluramine in nonconvulsive status epilepticus of Dravet syndrome	Letter	2020	Specchio N., Pietrafusa N., Ferretti A., Trivisano M., Vigevano F.	Epilepsia	61
32532910	Successful utilisation of epidural analgesia for perioperative pain management in a child with sodium voltage-gated channel alpha subunit (SCN1A) gene mutation	Article	2020	Sobey J.H., Menser C.C., Reddy S.K., Hughes E.M.	BMJ Case Reports	13
26803335	Supraventricular Tachycardia during Status Epilepticus in Dravet Syndrome: A Link between Brain and Heart?	Article	2016	Daverio M., Ciccone O., Boniver C., De Palma L., Corrado D., Vecchi M.	Pediatric Neurology	56
29455050	Targeted gene panel and genotype-phenotype correlation in children with developmental and epileptic encephalopathy	Article	2018	Ko A., Youn S.E., Kim S.H., Lee J.S., Kim S., Choi J.R., Kim H.D., Lee S.-T., Kang H.-C.	Epilepsy Research	141
22612257	Targeted next generation sequencing as a diagnostic tool in epileptic disorders	Article	2012	Lemke J.R., Riesch E., Scheurenbrand T., Schubach M., Wilhelm C., Steiner I., Hansen J., Courage C., Gallati S., Bürki S., Strozzi S., Simonetti B.G., Grunt S., Steinlin M., Alber M., Wolff M., Klopstock T., Prott E.C., Lorenz R., Spaich C., Rona S., Lakshminarasimhan M., Kröll J., Dorn T., Krämer G., Synofzik M., Becker F., Weber Y.G., Lerche H., Böhm D., Biskup S.	Epilepsia	53
27582020	Temperature-dependent changes in neuronal dynamics in a patient with an SCN1A mutation and hyperthermia induced seizures	Article	2016	Peters C., Rosch R.E., Hughes E., Ruben P.C.	Scientific Reports	6
23163885	The clinical utility of an SCN1A genetic diagnosis in infantile-onset epilepsy	Article	2013	Brunklaus A., Dorris L., Ellis R., Reavey E., Lee E., Forbes G., Appleton R., Cross J.H., Ferrie C., Hughes I., Jollands A., King M.D., Livingston J., Lynch B., Philip S., Scheffer I.E., Williams R., Zuberi S.M.	Developmental Medicine and Child Neurology	55
31249551	The Efficacy of Ketogenic Diet in 60 Chinese Patients With Dravet Syndrome	Article	2019	Front Neurol	Front Neurol	Front Neurol	Tian X
25666511	The European patient with Dravet syndrome: Results from a parent-reported survey on antiepileptic drug use in the European population with Dravet syndrome	Article	2015	Aras L.M., Isla J., Mingorance-Le Meur A.	Epilepsy and Behavior	44
25778844	The incidence of SCN1A-related Dravet syndrome in Denmark is 1:22,000: A population-based study from 2004 to 2009	Article	2015	Bayat A., Hjalgrim H., Møller R.S.	Epilepsia	56
1	The study of sodium and potassium channel gene single-nucleotide variation significance in non-mechanical forms of epilepsy	Article	2021	Khamdiyeva O., Tileules Z., Baratzhanova G., Perfilyeva A., Djansugurova L.	Egyptian Journal of Medical Human Genetics	22
15041696	Theoretical Investigation of the Neuronal Na+ Channel SCN1A: Abnormal Gating and Epilepsy	Article	2004	Clancy C.E., Kass R.S.	Biophysical Journal	86
22140129	Thoracic myelopathy secondary to seizure following scoliosis surgery	Article	2012	Myers K.A., Payne E.T., Esser M.J., Kirton A., Howard J.J.	Journal of Child Neurology	27
20879882	Timing of de novo mutagenesis - A twin study of sodium-channel mutations	Article	2010	Vadlamudi L., Dibbens L.M., Lawrence K.M., Iona X., McMahon J.M., Murrell W., Mackay-Sim A., Scheffer I.E., Berkovic S.F.	New England Journal of Medicine	363
1	Trazodone: A New Antiepileptic Drug for Dravet Syndrome?	Article	2018	Azevedo Kauppila L., Amorim I., Bentes C., Peralta A.R.	International Journal of Epilepsy	5
21204806	Two distinct regions in 2q24.2-q24.3 associated with idiopathic epilepsy	Article	2010	Epilepsia	Epilepsia	Epilepsia	Krepischi AC
27544716	Two mild cases of Dravet syndrome with truncating mutation of SCN1A	Article	2017	Takaori T., Kumakura A., Ishii A., Hirose S., Hata D.	Brain and Development	39
20682179	Two Novel Mutations in SCN1A Gene in Iranian Patients with Epilepsy	Article	2010	Ebrahimi A., Houshmand M., Tonekaboni S.H., Fallah Mahboob Passand M.S., Zainali S., Moghadasi M.	Archives of Medical Research	41
28387369	Unexplained Early Infantile Epileptic Encephalopathy in Han Chinese Children: Next-Generation Sequencing and Phenotype Enriching	Article	2017	Arafat A., Jing P., Ma Y., Pu M., Nan G., Fang H., Chen C., Fei Y.	Scientific Reports	7
26648591	Unexplained early onset epileptic encephalopathy: Exome screening and phenotype expansion	Article	2016	Allen N.M., Conroy J., Shahwan A., Lynch B., Correa R.G., Pena S.D.J., McCreary D., Magalhães T.R., Ennis S., Lynch S.A., King M.D.	Epilepsia	57
20172746	Unusual consequences of status epilepticus in Dravet syndrome	Article	2010	Seizure	Seizure	Seizure	Chipaux M
28079431	Vagus nerve stimulation in intractable epilepsy associated with SCN1A gene abnormalities	Article	2017	Fulton S.P., Van Poppel K., McGregor A.L., Mudigoudar B., Wheless J.W.	Journal of Child Neurology	32
23398550	Variability of EEG-fMRI findings in patients with SCN1A -positive Dravet syndrome	Article	2013	Moehring J., Von Spiczak S., Moeller F., Helbig I., Wolff S., Jansen O., Muhle H., Boor R., Stephani U., Siniatchkin M.	Epilepsia	54
21204810	Variable epilepsy phenotypes associated with a familial intragenic deletion of the SCN1A gene	Article	2010	Guerrini R., Cellini E., Mei D., Metitieri T., Petrelli C., Pucatti D., Marini C., Zamponi N.	Epilepsia	51
24679980	When is a child with status epilepticus likely to have Dravet syndrome?	Article	2014	Le Gal F., Lebon S., Ramelli G.P., Datta A.N., Mercati D., Maier O., Combescure C., Rodriguez M.I., Seeck M., Roulet E., Korff C.M.	Epilepsy Research	108
22000312	When should clinicians order genetic testing for dravet syndrome?	Article	2011	Fountain-Capal J.K., Holland K.D., Gilbert D.L., Hallinan B.E.	Pediatric Neurology	45
31444242	Dravet syndrome and parkinsonism: A case report investigating the dopaminergic system	Note	2019	Deuel L., Collins A.E., Maa E.H., Barr J.P., Kern D.S.	Neurology	93
24955329	Seizure Reduction with Fluoxetine in Dravet Syndrome	Case Reports	2014	Epilepsy Behav Case Rep	Epilepsy Behav Case Rep	Epilepsy Behav Case Rep	Meador KJ
	Cryptic chromosome deletions involving SCN1A in severe myoclonic epilepsy of infancy. Does "SMEI plus" exist? [Delezioni criptiche di 2q24.3-q31.1 coinvolgenti SCN1A in pazienti con epilessia mioclonica severa dell'infanzia. Esiste la "SMEI plus"?]	Conference Paper	2008	Striano P., Madia F., Coppola A., Mancardi M.M., Gennaro E., Budetta M., Cilio M.R., Ciampa C., Errichiello L., Gaggero R., Zara F.	Bollettino - Lega Italiana contro l'Epilessia
	Dravet syndrome: Clinical features in 20 patients and genotype-phenotype correlation [Sindrome di Dravet: Aspetti clinici in 20 pazienti e correlazione genotipo-fenotipo]	Conference Paper	2006	Ragona F., Freri E., Binelli S., De Giorgi I., Madia F., Zara F., Franceschetti S., Granata T.	Bollettino - Lega Italiana contro l'Epilessia
	Evaluation of efficacy and safety of levetiracetam in patients with Dravet Syndrome [Valutazione dell'efficacia e della tollerabilità del levetiracetam in soggetti affetti da Sindrome di Dravet]	Conference Paper	2008	Cacudi M., Boni A., Giannotta M., Giovannini S., Filippini M., Guerra A., Gobbi G.	Bollettino - Lega Italiana contro l'Epilessia
12861511	Severe myoclonic epilepsy in infancy (Dravet's syndrome). Some genetic aspects [Epilepsia mioclónica grave de la infancia (síndrome de Dravet). Aspectos genéticos]	Conference Paper	2003	Herranz J.L.	Revista de Neurologia	37
	Severe Myoclonic Epilepsy in Infancy (SMEI) and/or Dravet syndrome: Longitudinal electroclinical study of 53 subjects [Epilessia Mioclonica Severa (EMS) e/o sindrome di Dravet: Studio elettroclinico longitudinale di 53 soggetti]	Conference Paper	2004	Fontana E., Dalla Bernardina B., Sgrò V., Mastella L., Filippi A., Torniero C., Giannelli F., Meneghello L., Zara F.	Bollettino - Lega Italiana contro l'Epilessia
20738378	A case of SUDEP in a patient with Dravet syndrome with SCN1A mutation	Article	2010	Le Gal F., Korff C.M., Monso-Hinard C., Mund M.T., Morris M., Malafosse A., Schmitt-Mechelke T.	Epilepsia	51
33238377	Fatal Status Epilepticus in Dravet Syndrome	Article	2020	Brain Sci	Brain Sci	Brain Sci	De Liso P
31677916	Two autopsy cases of sudden unexpected death from Dravet syndrome with novel de novo SCN1A variants	Article	2020	Hata Y., Oku Y., Taneichi H., Tanaka T., Igarashi N., Niida Y., Nishida N.	Brain and Development	42
21463280	Mortality in Dravet syndrome: Search for risk factors in Japanese patients	Article	2011	Sakauchi M., Oguni H., Kato I., Osawa M., Hirose S., Kaneko S., Takahashi Y., Takayama R., Fujiwara T.	Epilepsia	52
27810515	Mortality in Dravet syndrome	Article	2016	Cooper M.S., Mcintosh A., Crompton D.E., McMahon J.M., Schneider A., Farrell K., Ganesan V., Gill D., Kivity S., Lerman-Sagie T., McLellan A., Pelekanos J., Ramesh V., Sadleir L., Wirrell E., Scheffer I.E.	Epilepsy Research	128

## Sheet:  GEFS+(93)
19951487	[Clinical analysis and screening for SCN1A gene mutation in two pedigrees of generalized epilepsies with febrile seizures plus].	Article	2009	Wang X.H., Zhou S.Z., Guo Q., Sun D.K.	Zhonghua er ke za zhi. Chinese journal of pediatrics	47
23158734	[Phenotype and SCN1A gene mutation screening in 39 families with generalized epilepsy with febrile seizures plus].	Article	2012	Xu X.J., Zhang Y.H., Sun H.H., Liu X.Y., Wu H.S., Wu X.R.	Zhonghua er ke za zhi. Chinese journal of pediatrics	50
19054398	A case report of a family with overlapping features of autosomal dominant febrile seizures and GEFS+	Article	2009	Hindocha N., Nabbout R., Elmslie F., Makoff A., Al-Chalabi A., Nashef L.	Epilepsia	50
15715999	A family of generalized epilepsy with febrile seizures plus type 2 - A new missense mutation of SCN1A found in the pedigree of several patients with complex febrile seizures	Article	2005	Nagao Y., Mazaki-Miyazaki E., Okamura N., Takagi M., Igarashi T., Yamakawa K.	Epilepsy Research	63
15525788	A novel epilepsy mutation in the sodium channel SCN1A identifies a cytoplasmic domain for β subunit interaction	Article	（GEFS+）2004	Spampanato J., Kearney J.A., De Haan G., McEwen D.P., Escayg A., Aradi I., MacDonald B.T., Levin S.I., Soltesz I., Benna P., Montalenti E., Isom L.L., Goldin A.L., Meisler M.H.	Journal of Neuroscience	24
19339291	A novel inherited mutation in the voltage sensor region of SCN1A is associated with panayiotopoulos syndrome in siblings and generalized epilepsy with febrile seizures plus	Article	2009	Livingston J.H., Cross J.H., Mclellan A., Birch R., Zuberi S.M.	Journal of Child Neurology	24
28262406	A novel inherited SCN1A mutation associated with GEFS+ in benign and encephalopathic epilepsy	Article	2017	Gauthier A.C., Manganas L.N., Mattson R.H.	Journal of Clinical Neuroscience	40
18625863	A novel locus for generalized epilepsy with febrile seizures plus in French families	Article	2008	Baulac S., Gourfinkel-An I., Couarch P., Depienne C., Kaminska A., Dulac O., Baulac M., LeGuern E., Nabbout R.	Archives of Neurology	65
21843600	A novel SCN1A missense mutation causes generalized epilepsy with febrile seizures plus in a Chinese family	Article	2011	Cui X., Zeng F., Liu Y., Zhang J., Archacki S., Zhan T., Du R., Tang Z., Liu J., Wang Q.K., Liu M.	Neuroscience Letters	503
11254445	A novel SCN1A mutation associated with generalized epilepsy with febrile seizures plus-And prevalence of variants in patients with epilepsy	Article	2001	Escayg A., Heils A., Macdonald B.T., Haug K., Sander T., Meisler M.H.	American Journal of Human Genetics	68
15694566	A novel SCN1A mutation associated with severe GEFS+ in a large South American pedigree	Article	2005	Pineda-Trujillo N., Carrizosa J., Cornejo W., Arias W., Franco C., Cabrera D., Bedoya G., Ruíz-Linares A.	Seizure	14
15827091	A novel susceptibility locus at 2p24 for generalised epilepsy with febrile seizures plus	Article	2005	Audenaert D., Claes L., Claeys K.G., Deprez L., Van Dyck T., Goossens D., Del-Favero J., Paesschen, Van Broeckhoven C., De Jonghe P.	Journal of Medical Genetics	42
26969601	A Point Mutation in SCN1A 5′ Genomic Region Decreases the Promoter Activity and Is Associated with Mild Epilepsy and Seizure Aggravation Induced by Antiepileptic Drug	Article	2017	Gao Q.-W., Hua L.-D., Wang J., Fan C.-X., Deng W.-Y., Li B., Bian W.-J., Shao C.-X., He N., Zhou P., Liao W.-P., Shi Y.-W.	Molecular Neurobiology	54
19402159	A rescuable folding defective Nav1.1 (SCN1A) sodium channel mutant causes GEFS+: Common mechanism in Nav1.1 related epilepsies?	Article	2009	Rusconi R., Combi R., Cestèle S., Grioni D., Franceschetti S., Dalprà L., Mantegazza M.	Human Mutation	30
10486327	A second locus for familial generalized epilepsy with febrile seizures plus maps to chromosome 2q21-q33	Article	1999	Baulac S., Gourfinkel-An I., Picard F., Rosenberg-Bourgin M., Prud'homme J.-F., Baulac M., Brice A., LeGuern E.	American Journal of Human Genetics	65
19289736	A splice site variant in the sodium channel gene SCN1A confers risk of febrile seizures	Article	2009	Schlachter K., Gruber-Sedlmayr U., Stogmann E., Lausecker M., Hotzy C., Balzar J., Schuh E., Baumgartner C., Mueller J.C., Illig T., Wichmann H.E., Lichtner P., Meitinger T., Strom T.M., Zimprich A., Zimprich F.	Neurology	72
16525050	An epilepsy mutation in the sodium channel SCN1A that decreases channel excitability	Article	2006	Barela A.J., Waddy S.P., Lickfett J.G., Hunter J., Anido A., Helmers S.L., Goldin A.L., Escayg A.	Journal of Neuroscience	26
34365615	Analysis of clinical phenotype and SCN1A gene variant in a pedigree affected with genetic epilepsy with febrile seizures	Article	2021	Sun S., Li X., Song J., Li Y., Xu L., Xia B., Hua Y., Zhu L., Wang J.	Zhonghua yi xue yi chuan xue za zhi = Zhonghua yixue yichuanxue zazhi = Chinese journal of medical genetics	38
1	Analysis of the correlation between febrile seizure and hot-spot polymorphism variation in SCN1A gene in children from Chongming County, Shanghai	Article	2016	Ye G.-Y., Chen L., Dai H., Liu X.-Q.	Journal of Shanghai Jiaotong University (Medical Science)	36
29429462	Association en SCN1a rs3812718 polymorphism and generalized epilepsy with febrile seizures plus	Article	2018	Ma Q.-L., Wang B., Chen G.-F., Huang J.-L., Li Y., Cao D.-Z., Liu R.-T.	Chinese Journal of Contemporary Pediatrics	20
15605469	Autism in several members of a family with generalized epilepsy with febrile seizures plus	Case Reports	2004	J Child Neurol	J Child Neurol	J Child Neurol	Dixon-Salazar TJ
11823106	Autosomal dominant epilepsy with febrile seizures plus with missense mutations of the (Na+)-channel α1 subunit gene, SCN1A	Article	2002	Ito M., Nagafuji H., Okazawa H., Yamakawa K., Sugawara T., Mazaki-Miyazaki E., Hirose S., Fukuma G., Mitsudome A., Wada K., Kaneko S.	Epilepsy Research	48
24257433	Broad phenotypic heterogeneity due to a novel SCN1A mutation in a family with genetic epilepsy with febrile seizures plus	Article	2014	Goldberg-Stern H., Aharoni S., Afawi Z., Bennett O., Appenzeller S., Pendziwiat M., Kuhlenbäumer G., Basel-Vanagaite L., Shuper A., Korczyn A.D., Helbig I.	Journal of Child Neurology	29
12060016	Clinical and genetic analysis of a new multigenerational pedigree with GEFS+ (Generalized Epilepsy with Febrile Seizures Plus)	Article	2002	Gérard F., Pereira S., Robaglia-Schlupp A., Genton P., Szepetowski P.	Epilepsia	43
31729702	Clinical and genetic aspect of 30 tunisian families with febrile seizures	Article	2019	Feki F.K., Fendri-Kriaa N., Kolsi D., Rabai A., Fakhfakh F., Triki C.C.	Tunisie Medicale	97
19200853	Clinical and genetic familial study of a large cohort of Italian children with idiopathic epilepsy	Article	2009	Combi R., Grioni D., Contri M., Redaelli S., Redaelli F., Bassi M.T., Barisani D., Lavitrano M.L., Tredici G., Tenchini M.L., Bertolini M., Dalprà L.	Brain Research Bulletin	79
1	Clinical and molecular genetic analysis of a multigenerational pedigree with generalized epilepsy with febrile seizures plus	Article	2007	Zhou S.-Z., Song Y.-Q., Chen C., Sun D.-K.	Chinese Journal of Neurology	40
28442529	Coinheritance of novel mutations in SCN1A causing gefs+ and in KDM6A causing kabuki syndrome in a family	Article	2017	Kim J., Lee C.G.	Annals of Clinical and Laboratory Science	47
32595013	Copy number variation in genetic epilepsy with febrile seizures plus	Article	2020	Fortin O., Vincelette C., Chénier S., Ghais A., Shevell M.I., Simard-Tremblay E., Myers K.A.	European Journal of Paediatric Neurology	27
1	De novo missense mutation in SCN1A: A case report of GEFS plus with good prognosis	Article	2005	De Polo G., Liava A., Martinuzzi A., Frate E., Gennaro E.	Bollettino - Lega Italiana contro l'Epilessia
28084635	De novo SCN1A pathogenic variants in the GEFS+ spectrum: Not always a familial syndrome	Article	2017	Myers K.A., Burgess R., Afawi Z., Damiano J.A., Berkovic S.F., Hildebrand M.S., Scheffer I.E.	Epilepsia	58
32540801	De novo truncating mutation in SCN1A as a cause of febrile seizures plus (FS+)	Article	2020	Jaimes A., Guerrero-López R., González-Giráldez B., Serratosa J.M.	Epileptic Disorders	22
22944210	De-novo mutations and genetic variation in the SCN1A gene in Malaysian patients with generalized epilepsy with febrile seizures plus (GEFS+)	Article	2012	Tan E.H., Razak S.A., Abdullah J.M., Mohamed Yusoff A.A.	Epilepsy Research	102
34293681	Differences in SCN1A intronic variants result in diverse aberrant splicing patterns and are related to the phenotypes of epilepsy with febrile seizures	Article	2021	Zhou X., Xu H., Cai X., Tang B., Liu X., Shi Y., Zheng J., Liao W., Yu L.	Epilepsy Research	176
19292758	Does a SCN1A gene mutation confer earlier age of onset of febrile seizures in GEFS+?	Article	2009	Sijben A.E.J., Sithinamsuwan P., Radhakrishnan A., Badawy R.A.B., Dibbens L., Mazarib A., Lev D., Lerman-Sagie T., Straussberg R., Berkovic S.F., Scheffer I.E.	Epilepsia	50
28373025	Early-life febrile seizures worsen adult phenotypes in Scn1a mutants	Article	2017	Dutton S.B.B., Dutt K., Papale L.A., Helmers S., Goldin A.L., Escayg A.	Experimental Neurology	293
1	Epilepsy and the SCN1A gene [Epilepsie en het SCN1A-gen]	Article	2008	Dekker N., Van Kempen M.J.A., Lindhout D., Van Nieuwenhuizen O., Brilstra E.H.	Tijdschrift voor Kindergeneeskunde	76
20477842	Failure to detect association between polymorphisms of the sodium channel gene SCN1A and febrile seizures in Chinese patients with epilepsy	Article	2010	Zhang C., Wong V., Ng P.W., Lui C.H.T., Sin N.C., Wong K.S., Baum L., Kwan P.	Epilepsia	51
22578703	Failure to find association between febrile seizures and SCN1A rs3812718 polymorphism in south Indian patients with mesial temporal lobe epilepsy and hippocampal sclerosis	Article	2012	Balan S., Vellichirammal N.N., Banerjee M., Radhakrishnan K.	Epilepsy Research	101
17884755	GEFS+ where focal seizures evolve from generalized spike wave: Video-EEG study of two children	Article	2007	Yu H.D., Berkovic S.F., Scheffer I.E.	Epileptic Disorders	9
22011963	Generalised epilepsy with febrile seizures plus (GEFS +): Molecular analysis in a restricted area	Article	2012	Polizzi A., Incorpora G., Pavone P., Ruggieri M., Annesi G., Gambardella A., Pavone L., Quattrone A.	Child's Nervous System	28
1	Generalized epilepsy with febrile seizure plus (GEFS+) spectrum: Novel de novo mutation of SCN1A detected in a Malaysian patient	Article	2012	Tan E.H., Yusoff A.A.M., Abdullah J.M., Razak S.A.	Journal of Pediatric Neurosciences	7
23248692	Generalized epilepsy with febrile seizure plus (GEFS+) spectrum: Novel de novo mutation of SCN1A detected in a Malaysian patient	Article	2012	J Pediatr Neurosci	J Pediatr Neurosci	J Pediatr Neurosci	Tan EH
20452746	Generalized epilepsy with febrile seizures plus (GEFS+) spectrum: Clinical manifestations and SCN1A mutations in Indonesian patients	Article	2010	Herini E.S., Gunadi, Harahap I.S.K., Yusoff S., Morikawa S., Patria S.Y., Nishimura N., Sunartini, Sutaryo, Takada S., Matsuo M., Nishio H.	Epilepsy Research	90
12535936	Generalized epilepsy with febrile seizures plus type 2 mutation W1204R alters voltage-dependent gating of Nav1.1 sodium channels	Article	2003	Spampanato J., Escayg A., Meisler M.H., Goldin A.L.	Neuroscience	116
16053169	Generalized epilepsy with febrile seizures plus: clinical and genetic analysis of three Serbian families	Article	2005	Ristić A.J., Janković S., Annesi G., Carrideo S., Annesi F., Gambardella A., Maksimović G., Gnjatović B., Petrović I., Vojvodić N., Sokić D.	Srpski arhiv za celokupno lekarstvo	133
11591834	Generalized epilepsy with febrile seizures plus: Further heterogeneity in a large family	Article	2001	Lerche H., Weber Y.G., Baier H., Jurkat-Rott K., Kraus De Camargo O., Ludolph A.C., Bode H., Lehmann-Horn F.	Neurology	57
20117752	Generalized Epilepsy With Febrile Seizures plus: Novel SCN1A Mutation	Article	2010	Dimova P.S., Yordanova I., Bojinova V., Jordanova A., Kremenski I.	Pediatric Neurology	42
25874779	Genetic epilepsies with febrile seizures plus: clinical spectrum of Polish patients with SCN1A mutation - preliminary report	Article	2014	Terczyńska I., Szczepanik E., Duszyc K., Górka P., Tataj R., Hoffman-Zacharska D.	Developmental period medicine	18
19236456	Genetic screening of two Tunisian families with generalized epilepsy with febrile seizures plus	Article	2009	Fendri-Kriaa N., Kammoun F., Rebai A., Kolsi D., Hadj Salem I., Fakhfakh F., Triki C.	European Journal of Neurology	16
20729507	Genotype-phenotype correlations in a group of 15 SCN1A-mutated italian patients with GEFS+ spectrum (seizures plus, classical and borderline severe myoclonic epilepsy of infancy)	Article	2010	Nicita F., Spalice A., Papetti L., Ursitti F., Parisi P., Gennaro E., Zara F., Iannetti P.	Journal of Child Neurology	25
1	Identification of a Novel Nonsense Variant in the SCN1A Gene that Causes Febrile Seizure Disorder	Article	2018	Jouali F., Marchoudi N., Rouissi A., Fekkak J.	Journal of Pediatric Neurology	16
16326807	Identification of an Nav1.1 sodium channel (SCN1A) loss-of-function mutation associated with familial simple febrile seizures	Article	2005	Mantegazza M., Gambardella A., Rusconi R., Schiavon E., Annesi F., Cassulini R.R., Labate A., Carrideo S., Chifari R., Canevini M.P., Canger R., Franceschetti S., Annesi G., Wanke E., Quattrone A.	Proceedings of the National Academy of Sciences of the United States of America	102
28951233	Identification of two mutations in cis in the SCN1A gene in a family showing genetic epilepsy with febrile seizures plus (GEFS+) and idiopathic generalized epilepsy (IGE)	Article	2017	Binini N., Sancini G., Villa C., Dal Magro R., Sansoni V., Rusconi R., Mantegazza M., Grioni D., Talpo F., Toselli M., Combi R.	Brain Research	1677
17561957	Idiopathic epilepsies with seizures precipitated by fever and SCN1A abnormalities	Article	2007	Marini C., Mei D., Temudo T., Ferrari A.R., Buti D., Dravet C., Dias A.I., Moreira A., Calado E., Seri S., Neville B., Narbona J., Reid E., Michelucci R., Sicca F., Cross H.J., Guerrini R.	Epilepsia	48
19171087	Linkage location and mutation analysis of generalized epilepsy with febrile seizures plus	Article	2008	Lin H., Wang Y.-P., Wang M.-Y., Wu L.-W.	National Medical Journal of China	88
26311622	Missense mutations in sodium channel SCN1A and SCN2A predispose children to encephalopathy with severe febrile seizures	Article	2015	Saitoh M., Ishii A., Ihara Y., Hoshino A., Terashima H., Kubota M., Kikuchi K., Yamanaka G., Amemiya K., Hirose S., Mizuguchi M.	Epilepsy Research	117
12383277	Molecular genetics of febrile seizures	Conference Paper	2002	Iwasaki N., Nakayama J., Hamano K., Matsui A., Arinami T.	Epilepsia	43
1	Mosaic SCN1A mutation in a family with partial epilepsy with febrile seizures plus	Article	2008	Chen L., Shi Y.-W., Deng W.-Y., Yu M.-J., Long Y.-S., Liu X.-R., Gao M.-M., Chang H.-H., Yi Y.-H., Liao W.-P.	Chinese Journal of Neurology	41
22151702	Mosaic SCN1A mutations in familial partial epilepsy with antecedent febrile seizures	Article	2012	Shi Y.-W., Yu M.-J., Long Y.-S., Qin B., He N., Meng H., Liu X.-R., Deng W.-Y., Gao M.-M., Yi Y.-H., Li B.-M., Liao W.-P.	Genes, Brain and Behavior	11
21704126	Mutation screening of three Chinese families with genetic epilepsy with febrile seizures plus	Article	2011	Lin H., Li J., Wang M., Wang Z., Wang Y., Wu L.	Neuroscience Letters	500
33895391	Mutations in the sodium channel genes SCN1A, SCN3A, and SCN9A in children with epilepsy with febrile seizures plus(EFS+)	Article	2021	Ma H., Guo Y., Chen Z., Wang L., Tang Z., Zhang J., Miao Q., Zhai Q.	Seizure	88
10742094	Mutations of SCN1A, encoding a neuronal sodium channel, in two families with GEFS+2	Article	2000	Escayg A., MacDonald B.T., Meisler M.H., Baulac S., Huberfeld G., An-Gourfinkel I., Brice A., LeGuern E., Moulard B., Chaigne D., Buresi C., Malafosse A.	Nature Genetics	24
11524484	Nav1.1 mutations cause febrile seizures associated with afebrile partial seizures	Article	2001	Sugawara T., Mazaki-Miyazaki E., Ito M., Nagafuji H., Fukuma G., Mitsudome A., Wada K., Kaneko S., Hirose S., Yamakawa K.	Neurology	57
11254444	Neuronal sodium-channel β1-subunit mutations in generalized epilepsy with febrile seizures plus	Article	2001	Wallace R.H., Scheffer I.E., Barnett S., Richards M., Dibbens L., Desai R.R., Lerman-Sagie T., Lev D., Mazarib A., Brand N., Ben-Zeev B., Goikhman I., Singh R., Kremmidiotis G., Gardner A., Sutherland G.R., George A.L., Jr., Mulley J.C., Berkovic S.F.	American Journal of Human Genetics	68
34706024	Nodular heterotopia: a rare finding in patients with epilepsy and SCN1A mutation	Article	2021	Arq Neuropsiquiatr	Arq Neuropsiquiatr	Arq Neuropsiquiatr	Klettenberg MRP
17903680	Novel De Novo Mutation of a Conserved SCN1A Amino-Acid Residue (R1596)	Article	2007	Dlugos D.J., Ferraro T.N., Buono R.J.	Pediatric Neurology	37
18632234	Novel de novo splice-site mutation of SCN1A in a patient with partial epilepsy with febrile seizures plus	Article	2009	Kumakura A., Ito M., Hata D., Oh N., Kurahashi H., Wang J.-w., Hirose S.	Brain and Development	31
21488258	Novel human pathological mutations. Gene symbol: SCN1A. Disease: generalized epilepsy with febrile seizures plus	Article	2010	Hum Genet	Hum Genet	Hum Genet	Lin WD
11756608	Partial and generalized epilepsy with febrile seizures plus and a novel SCN1A mutation	Article	2001	Abou-Khalil B., Ge Q., Desai R., Ryther R., Bazyk A., Bailey R., Haines J.L., Sutcliffe J.S., George A.L.	Neurology	57
17507202	Patients with a sodium channel alpha 1 gene mutation show wide phenotypic variation	Article	2007	Osaka H., Ogiwara I., Mazaki E., Okamura N., Yamashita S., Iai M., Yamada M., Kurosawa K., Iwamoto H., Yasui-Furukori N., Kaneko S., Fujiwara T., Inoue Y., Yamakawa K.	Epilepsy Research	75
16884893	Phenotypes and genotypes in epilepsy with febrile seizures plus	Article	2006	Ito M., Yamakawa K., Sugawara T., Hirose S., Fukuma G., Kaneko S.	Epilepsy Research	70
21762453	Replication of association between a SCN1A splice variant and febrile seizures	Article	2011	Le Gal F., Salzmann A., Crespel A., Malafosse A.	Epilepsia	52
28192756	SCN1A clinical spectrum includes the self-limited focal epilepsies of childhood	Article	2017	Kivity S., Oliver K.L., Afawi Z., Damiano J.A., Arsov T., Bahlo M., Berkovic S.F.	Epilepsy Research	131
20875856	Scn1a missense mutation causes limbic hyperexcitability and vulnerability to experimental febrile seizures	Article	2011	Ohno Y., Ishihara S., Mashimo T., Sofue N., Shimizu S., Imaoku T., Tsurumi T., Sasa M., Serikawa T.	Neurobiology of Disease	41
33108073	SCN1A mutation spectrum in a cohort of bulgarian patients with GEFS+ phenotype	Article	2020	Peycheva V., Ivanova N., Kamenarova K., Panova M., Pacheva I., Ivanov I., Bojidarova M., Tacheva G., Stamatov D., Litvinenko I., Hristova D., Deneva D., Rodopska E., Slavkova E., Aleksandrova I., Simeonov E., Dimova P., Bojinova V., Mitev V., Jordanova A., Kaneva R.	Turkish Journal of Pediatrics	62
21868258	SCN1A mutational analysis in Korean patients with Dravet syndrome	Article	2011	Lim B.C., Hwang H., Chae J.H., Choi J.-E., Hwang Y.S., Kang S.-H., Ki C.-S., Kim K.J.	Seizure	20
30977726	SCN1A mutations in focal epilepsy with auditory features: widening the spectrum of GEFS plus	Article	2019	Bisulli F., Licchetta L., Baldassari S., Muccioli L., Marconi C., Cantalupo G., Myers C., Menghi V., Minardi R., Caporali L., Marini C., Guerrini R., Mefford H.C., Tinuper P., Pippucci T.	Epileptic Disorders	21
18566737	SCN1A, SCN1B, and GABRG2 gene mutation analysis in Chinese families with generalized epilepsy with febrile seizures plus	Article	2008	Sun H., Zhang Y., Liang J., Liu X., Ma X., Wu H., Xu K., Qin J., Qi Y., Wu X.	Journal of Human Genetics	53
34174751	SCN1A-related epilepsy with recessive inheritance: Two further families	Article	2021	Moretti R., Arnaud L., Bouteiller D., Trouillard O., Moreau P., Buratti J., Rastetter A., Keren B., Des Portes V., Toulouse J., Gourfinkel-An I., Leguern E., Depienne C., Mignot C., Nava C.	European Journal of Paediatric Neurology	33
	Screening of SCN1A gene mutation in 10 families with generalized epilepsy accompanied by febrile seizure	Article	2014	Wu G.-S., Gao F., Shen Z., Mao S.-S., Shen J., Yuan Z.-F., Li S.	Medical Journal of Chinese People's Liberation Army	39
33851920	Temporal-parietal-occipital epilepsy in GEFS+ associated with SCN1A mutation	Article	2021	Riva A., Coppola A., Balagura G., Scala M., Iacomino M., Marchese F., Amadori E., Lattanzi S., Meo R., Striano S., Salpietro V., Zara F., Minetti C., Striano P., Bilo L.	Epileptic Disorders	23
12919402	Two novel scn1a missense mutations in generalized epilepsy with febrile seizures plus	Short Survey	2003	Annesi G., Gambardella A., Carrideo S., Incorpora G., Labate A., Pasqua A.A., Civitelli D., Polizzi A., Annesi F., Spadafora P., Tarantino P., Cirò Candiano I.C., Romeo N., De Marco E.V., Ventura P., LePiane E., Zappia M., Aguglia U., Pavone L., Quattrone A.	Epilepsia	44
	Vagus nerve stimulation for genetic epilepsy with febrile seizures plus (GEFS+) accompanying seizures with impaired consciousness	Article	2017	Hanaya R., Kashida Y., Hosoyama H., Arita K., Niantiarno F.H., Maruyama S., Otsubo T., Tanaka K., Ishii A., Hirose S.	Epilepsy and Behavior Case Reports	7
21775168	Variable expressivity of a novel mutation in the SCN1A gene leading to an autosomal dominant seizure disorder	Article	2011	Mhanni A.A., Hartley J.N., Sanger W.G., Chudley A.E., Spriggs E.L.	Seizure	20
19464195	Variable neurologic phenotype in a GEFS+ family with a novel mutation in SCN1A	Article	2009	Mahoney K., Moore S.J., Buckley D., Alam M., Parfrey P., Penney S., Merner N., Hodgkinson K., Young T.-L.	Seizure	18
16359470	A case of extended spectrum GEFS+	Case Reports	2005	Grant A.C., Vazquez B.	Epilepsia	46
17927801	Genetic screening of Scandinavian families with febrile seizures and epilepsy or GEFS+	Article	2008	Selmer K.K., Egeland T., Solaas M.H., Nakken K.O., Kjeldsen M.J., Friis M.L., Brandal K., Corey L.A., Undlien D.E.	Acta Neurologica Scandinavica	117
	A four generation sardinian family with idiopathic generalized epilepsy and febrile seizures: Clinical and genetic study [Studio clinico e genetico su quattro generazioni di una famiglia sarda con epilessia generalizzata idiopatica e convulsioni febbrili]	Conference Paper	2008	Pisano T., Falchi M., Meloni M., Gaspa G., Scioni M., Chillotti I., Madeddu F., Cianchetti C., Pruna D.	Bollettino - Lega Italiana contro l'Epilessia
	Electroclinical features of a family with SCN1A loss-of-function mutation associated with simple febrile seizures [Caratteristiche elettrocliniche di una famiglia con convulsioni febbrili semplici associata a mutazione con perdita della funzione di SCN1A]	Conference Paper	2006	Colosimo E., Gambardella A., Mantegazza M., Labate A., Rusconi R., Schiavon E., Annesi F., Cassulini R.R., Carrideo S., Chifari R., Canevini M.P., Canger R., Franceschetti S., Annesi G., Wanke E., Quattrone A.	Bollettino - Lega Italiana contro l'Epilessia
20367785	Febrile seizures, genetic (generalized) epilepsy with febrile seizures plus, and Dravet's syndrome	Case Reports	2010	J Spec Pediatr Nurs	J Spec Pediatr Nurs	J Spec Pediatr Nurs	Scanlon A
18251839	Two cases of sudden unexpected death in epilepsy in a GEFS+ family with an SCN1A mutation	Letter	2008	Hindocha N., Nashef L., Elmslie F., Birch R., Zuberi S., Al-Chalabi A., Crotti L., Schwartz P.J., Makoff A.	Epilepsia	49
30660056	Sudden unexpected death in GEFS+ families with sodium channel pathogenic variants	Article	2019	Myers K.A., Shevell M.I., Sébire G.	Epilepsy Research	150

## Sheet: EMAS Doose(3)
30660939	Genetic testing in a cohort of patients with potential epilepsy with myoclonic-atonic seizures	Article	2019	Angione K., Eschbach K., Smith G., Joshi C., Demarest S.	Epilepsy Research	150
21396429	One novel Dravet syndrome causing mutation and one recurrent MAE causing mutation in SCN1A gene	Article	2011	Yordanova I., Todorov T., Dimova P., Hristova D., Tincheva R., Litvinenko I., Yotovska O., Kremensky I., Todorova A.	Neuroscience Letters	494
32913952	Clinical and genetic characteristics of patients with Doose syndrome	Article	2020	Epilepsia Open	Epilepsia Open	Epilepsia Open	Hinokuma N

[truncated: 9 more sheets: MPSI or EIMFS(9), West syndrom IS(6), LGS（2）, RS(1), NEE(7), Migraine(19), ASD(6), Death（2）, AMC(2)]
