# Supplementary material for: SCN1A Mutation—Beyond Dravet Syndrome: A Systematic Review and Narrative Synthesis
Source: Front Neurol. 2021 Dec 24;12:743726. doi: 10.3389/fneur.2021.743726 (PMC8739186; doi:10.3389/fneur.2021.743726)
Supplement: Supplementary file 1 [file Data_Sheet_1.ZIP › ╬─╧╫╝∞╦≈/include 453.xls]

## Sheet: Dravet(303)
28441824	[Clinical and neuroimaging features of acute encephalopathy after status epilepticus in Dravet syndrome]	Article	2017	Zhonghua Er Ke Za Zhi	Zhonghua Er Ke Za Zhi	Zhonghua Er Ke Za Zhi	Tian XJ
19099883	[Clinical features and SCN1A gene mutation analysis of severe myoclonic epilepsy of infancy].	Article	2008	Zhang Y.H., Sun H.H., Liu X.Y., Ma X.W., Yang Z.X., Xiong H., Qin J., Lin Q., Wu X.R.	Zhonghua er ke za zhi. Chinese journal of pediatrics	46
29141311	[Study on mosaicism of SCN1A gene mutation in parents of children with Dravet syndrome]	Article	2017	Zhonghua Er Ke Za Zhi	Zhonghua Er Ke Za Zhi	Zhonghua Er Ke Za Zhi	Liu AJ
30872930	A case of Dravet Syndrome with a newly defined mutation in the SCN1A gene	Case Reports	2018	Turk Pediatri Ars	Turk Pediatri Ars	Turk Pediatri Ars	Tun?er G?
1	A case of Dravet Syndrome with a newly defined mutation in the SCN1A gene	Article	2018	Öz Tunçer G., Teber S., Albayrak P., Kutluk M.G., Deda G.	Turk Pediatri Arsivi	53
27523882	A case of Dravet syndrome with cortical myoclonus indicated by jerk-locked back-averaging of electroencephalogram data	Article	2017	Kobayashi Y., Hanaoka Y., Akiayma T., Ohmori I., Ouchida M., Yamamoto T., Oka M., Yoshinaga H., Kobayashi K.	Brain and Development	39
25986186	A clinical variant in SCN1A inherited from a mosaic father cosegregates with a novel variant to cause Dravet syndrome in a consanguineous family	Article	2015	Tuncer F.N., Gormez Z., Calik M., Altiokka Uzun G., Sagiroglu M.S., Yuceturk B., Yuksel B., Baykan B., Bebek N., Iscan A., Ugur Iseri S.A., Ozbek U.	Epilepsy Research	113
16122630	A missense mutation in SCN1A in brothers with severe myoclonic epilepsy in infancy (SMEI) inherited from a father with febrile seizures	Article	2005	Kimura K., Sugawara T., Mazaki-Miyazaki E., Hoshino K., Nomura Y., Tateno A., Hachimori K., Yamakawa K., Segawa M.	Brain and Development	27
33816011	A Mutation in the SCN1A Gene With a Peculiar Course: A Case Report	Case Reports	2021	Cureus	Cureus	Cureus	Sur L
17000989	A new molecular mechanism for severe myoclonic epilepsy of infancy: Exonic deletions in SCN1A	Article	2006	Mulley J.C., Nelson P., Guerrero S., Dibbens L., Iona X., McMahon J.M., Harkin L., Schouten J., Yu S., Berkovic S.F., Scheffer I.E.	Neurology	67
1	A new SCN1A mutation in a patient affected by severe myoclonic epilepsy of infancy	Article	2005	Zucca C., Zanotta N., Panzeri C., Airoldi G., Redaelli F., Bassi M.T.	Bollettino - Lega Italiana contro l'Epilessia
21114141	A novel de novo SCN1A missense mutation in severe myoclonic epilepsy borderland	Article	2010	Specchio N., Trivisano M., Balestri M., Gennaro E., Specchio L.M., Fusco L., Zara F., Vigevano F.	Acta Neurologica Belgica	110
25569746	A novel inherited SCN1A mutation associated with different neuropsychological phenotypes: Is there a common core deficit?	Article	2015	Passamonti C., Petrelli C., Mei D., Foschi N., Guerrini R., Provinciali L., Zamponi N.	Epilepsy and Behavior	43
33042244	A Novel SCN1A Mutation: A Case Report	Article	2020	J Pediatr Neurosci	J Pediatr Neurosci	J Pediatr Neurosci	Aslan M
31102827	A novel variant in SCN1A gene associated with Dravet syndrome	Article	2019	Pathirana B.A.P.S., Hettiarachchi D., Neththikumara N.F., Ratnayake P.D., Dissanayake V.H.W.	Seizure	69
24464349	A novel variant in the 3′ UTR of human SCN1A gene from a patient with Dravet syndrome decreases mRNA stability mediated by GAPDH's binding	Article	2014	Zeng T., Dong Z.-F., Liu S.-J., Wan R.-P., Tang L.-J., Liu T., Zhao Q.-H., Shi Y.-W., Yi Y.-H., Liao W.-P., Long Y.-S.	Human Genetics	133
21531204	A putative disease-associated haplotype within the SCN1A gene in Dravet syndrome	Article	2011	Fendri-Kriaa N., Boujilbene S., Kammoun F., Mkaouar-Rebai E., Mahmoud A.B., Hsairi I., Rebai A., Triki C., Fakhfakh F.	Biochemical and Biophysical Research Communications	408
18076640	A Screening test for the prediction of Dravet syndrome before one year of age	Article	2008	Hattori J., Ouchida M., Ono J., Miyake S., Maniwa S., Mimaki N., Ohtsuka Y., Ohmori I.	Epilepsia	49
31864146	A single-center, retrospective analysis of genotype-phenotype correlations in children with Dravet syndrome	Article	2020	Gertler T.S., Calhoun J., Laux L.	Seizure	75
30526861	Aberrant Inclusion of a Poison Exon Causes Dravet Syndrome and Related SCN1A-Associated Genetic Epilepsies	Article	2018	Carvill G.L., Engel K.L., Ramamurthy A., Cochran J.N., Roovers J., Stamberger H., Lim N., Schneider A.L., Hollingsworth G., Holder D.H., Regan B.M., Lawlor J., Lagae L., Ceulemans B., Bebin E.M., Nguyen J., Striano P., Zara F., Helbig I., Møller R.S., von Spiczak S., Muhle H., Caglayan H., Sterbova K., Craiu D., Hoffman D., Lehesjoki A.-E., Selmer K., Depienne C., Lemke J., Marini C., Guerrini R.…	American Journal of Human Genetics	103
31879226	Abnormal brain gamma oscillations in response to auditory stimulation in Dravet syndrome	Article	2020	Sanchez-Carpintero R., Urrestarazu E., Cieza S., Alegre M., Artieda J., Crespo-Eguilaz N., Valencia M.	European Journal of Paediatric Neurology	24
25924876	Activity of drugs and components of natural origin in the severe myoclonic epilepsy of infancy (Dravet syndrome)	Article	2015	Berio A., Piazzi A.	Central Nervous System Agents in Medicinal Chemistry	15
21647847	Acute encephalopathy in a patient with Dravet syndrome	Article	2011	Tsuji M., Mazaki E., Ogiwara I., Wada T., Iai M., Okumura A., Yamashita S., Yamakawa K., Osaka H.	Neuropediatrics	42
22092154	Acute encephalopathy in children with Dravet syndrome	Article	2012	Okumura A., Uematsu M., Imataka G., Tanaka M., Okanishi T., Kubota T., Sudo A., Tohyama J., Tsuji M., Ohmori I., Naiki M., Hiraiwa-Sofue A., Sato H., Saitoh S., Shimizu T.	Epilepsia	53
20491869	Acute encephalopathy with a truncation mutation in the SCN1A gene: A case report	Article	2010	Takayanagi M., Haginoya K., Umehara N., Kitamura T., Numata Y., Wakusawa K., Hino-Fukuyo N., Mazaki E., Yamakawa K., Ohura T., Ohtake M.	Epilepsia	51
19303743	Addition of verapamil in the treatment of severe myoclonic epilepsy in infancy	Article	2009	Iannetti P., Parisi P., Spalice A., Ruggieri M., Zara F.	Epilepsy Research	85
22226577	Additional information regarding "Dravet syndrome: inroads into understanding epileptic encephalopathies"	Article	2012	J Pediatr	J Pediatr	J Pediatr	Kobayashi K
1	Adult phenotypes in Angelman- and Rett-like syndromes	Article	2012	Willemsen M.H., Rensen J.H.M., Van Schrojenstein-Lantman De Valk H.M.J., Hamel B.C.J., Kleefstra T.	Molecular Syndromology	2
21371021	Adults with a history of possible Dravet syndrome: An illustration of the importance of analysis of the SCN1A gene	Article	2011	Verbeek N.E., Van Kempen M., Gunning W.B., Renier W.O., Westland B., Lindhout D., Brilstra E.H.	Epilepsia	52
28683344	Age-related “Sleep/nocturnal” tonic and tonic clonic seizure clusters are underdiagnosed in patients with Dravet Syndrome	Article	2017	Losito E., Kuchenbuch M., Chemaly N., Laschet J., Chiron C., Kaminska A., Nabbout R.	Epilepsy and Behavior	74
21844054	Alleged cases of vaccine encephalopathy rediagnosed years later as dravet syndrome	Article	2011	Reyes I.S., Hsieh D.T., Laux L.C., Wilfong A.A.	Pediatrics	128
26096185	Amplicon Resequencing Identified Parental Mosaicism for Approximately 10% of "de novo" SCN1A Mutations in Children with Dravet Syndrome	Article	2015	Xu X., Yang X., Wu Q., Liu A., Yang X., Ye A.Y., Huang A.Y., Li J., Wang M., Yu Z., Wang S., Zhang Z., Wu X., Wei L., Zhang Y.	Human Mutation	36
22824327	An electroclinical study of absence seizures in Dravet syndrome	Article	Epilepsy Research	103	103	103
19809937	An inherited nonsense R1645X mutation in neuronal sodium channel 1-subunit gene in a Turkish patient with severe myoclonic epilepsy of infancy	Article	2009	Gökben S., Berdeli A., Serdarolu G.	Neuropediatrics	40
17636062	An open-label trial of levetiracetam in severe myoclonic epilepsy of infancy	Article	2007	Striano P., Coppola A., Pezzella M., Ciampa C., Specchio N., Ragona F., Mancardi M.M., Gennaro E., Beccaria F., Capovilla G., Rasmini P., Besana D., Coppola G.G., Elia M., Granata T., Vecchi M., Vigevano F., Viri M., Gaggero R., Striano S., Zara F.	Neurology	69
26252084	Analysis of parental origin of de novo SCN1A mutations in Dravet syndrome	Article	2015	Sun H., Zhang Y., Xu X., Liu X., Wu X.	Chinese Journal of Medical Genetics	32
29188601	Analysis of SCN1A deletions or duplications in patients with Dravet syndrome	Article	2017	Zeng Q., Zhang Y., Yang X., Xu X., Zhang J., Tian X., Liu A., Liu X., Jiang Y., Wu X.	Chinese Journal of Medical Genetics	34
33565071	Analysis of SCN1A gene variants among patients with Dravet syndrome	Article	2021	Li L., Zhu D.	Zhonghua yi xue yi chuan xue za zhi = Zhonghua yixue yichuanxue zazhi = Chinese journal of medical genetics	38
20431604	Analysis of SCN1A mutation and parental origin in patients with Dravet syndrome	Article	2010	Sun H., Zhang Y., Liu X., Ma X., Yang Z., Qin J., Jiang Y., Qi Y., Wu X.	Journal of Human Genetics	55
22098725	Are SCN1A gene mutations responsible for genetic susceptibility to subacute sclerosing panencephalitis?	Article	2012	Garg R.K.	Medical Hypotheses	78
25669891	Association of severe myoclonic epilepsy of infancy (SMEI) with probable autoimmune lymphoproliferative syndrome-variant	Article	2014	Berio A., Mangiante G., Piazzi A.	Pediatria Medica e Chirurgica	36
24328833	Atypical multifocal Dravet syndrome lacks generalized seizures and may show later cognitive decline	Article	2014	Kim Y.O., Bellows S., Mcmahon J.M., Iona X., Damiano J., Dibbens L., Kelley K., Gill D., Cross J.H., Berkovic S.F., Scheffer I.E.	Developmental Medicine and Child Neurology	56
27231140	Audit of use of stiripentol in adults with Dravet syndrome	Article	2017	Balestrini S., Sisodiya S.M.	Acta Neurologica Scandinavica	135
18294202	Balanced translocation in a patient with severe myoclonic epilepsy of infancy disrupts the sodium channel gene SCN1A	Article	2008	Møller R.S., Schneider L.M., Hansen C.P., Bugge M., Ullmann R., Tommerup N., Tümer Z.	Epilepsia	49
30578097	Behavior problems and health-related quality of life in Dravet syndrome	Article	2019	Sinoo C., de Lange I.M.-L., Westers P., Gunning W.B., Jongmans M.J., Brilstra E.H.	Epilepsy and Behavior	90
21463273	Borderline Dravet syndrome: A useful diagnostic category?	Article	2011	Guerrini R., Oguni H.	Epilepsia	52
25048308	Brain morphometry of Dravet Syndrome	Article	2014	Pérez A., García-Pentón L., Canales-Rodríguez E.J., Lerma-Usabiaga G., Iturria-Medina Y., Román F.J., Davidson D., Alemán-Gómez Y., Acha J., Carreiras M.	Epilepsy Research	108
17381446	Brain MRI findings in severe myoclonic epilepsy in infancy and genotype-phenotype correlations	Article	2007	Striano P., Mancardi M.M., Biancheri R., Madia F., Gennaro E., Paravidino R., Beccaria F., Capovilla G., Bernardina B.D., Darra F., Elia M., Giordano L., Gobbi G., Granata T., Ragona F., Guerrini R., Marini C., Mei D., Longaretti F., Romeo A., Siri L., Specchio N., Vigevano F., Striano S., Tortora F., Rossi A., Minetti C., Dravet C., Gaggero R., Zara F.	Epilepsia	48
22430156	Bromide in patients with SCN1A -mutations manifesting as dravet syndrome	Article	2012	Lotte J., Haberlandt E., Neubauer B., Staudt M., Kluger G.	Neuropediatrics	43
29692967	Can the combination of hyperthermia, seizures and ion channel dysfunction cause fatal post-ictal cerebral edema in patients with SCN1A mutations?	Case Reports	2017	Epilepsy Behav Case Rep	Epilepsy Behav Case Rep	Epilepsy Behav Case Rep	Büren C
31533007	Case studies in neuroscience: A novel amino acid duplication in the NH2terminus of the brain sodium channel NaV1.1 underlying Dravet syndrome	Article	2019	Angus M., Peters C.H., Poburko D., Brimble E., Spelbrink E.M., Ruben P.C.	Journal of Neurophysiology	122
19786689	Child neurology: Dravet syndrome: When to suspect the diagnosis	Article	2009	Millichap J.J., Koh S., Laux L.C., Nordli D.R.	Neurology	73
19070316	Clinical and genetic diagnosis of Dravet syndrome: report of 20 cases	Article	2008	Zsuzsa S., Magdolna N., Márta H., Eva P., Beatrix P., Andrea T., Péter B., Veronika K., Lieve C., De Peter J., Agnes H., András F.	Ideggyógyászati szemle	61
28202706	Clinical and genetic factors predicting Dravet syndrome in infants with SCN1A mutations	Article	2017	Cetica V., Chiari S., Mei D., Parrini E., Grisotto L., Marini C., Pucatti D., Ferrari A., Sicca F., Specchio N., Trivisano M., Battaglia D., Contaldo I., Zamponi N., Petrelli C., Granata T., Ragona F., Avanzini G., Guerrini R.	Neurology	88
30558019	Clinical and molecular analysis of epilepsy-related genes in patients with Dravet syndrome	Article	2018	Jiang T., Shen Y., Chen H., Yuan Z., Mao S., Gao F.	Medicine (United States)	97
1	Clinical characteristics, resource utilization, quality of life and care situation for patients with Dravet syndrome in Germany	Article	2019	Kalski M., Schubert-Bast S., Kieslich M., Leyer A.‑C., Polster T., Herting A., Mayer T., Trollmann R., Neubauer B.A., Bettendorf U., Bast T., Wiemer-Kruel A., von Spiczak S., Kurlemann G., Wolff M., Kluger G., Carroll J., Macdonald D., Pritchard C., Irwin J., Klein K.M., Rosenow F., Strzelczyk A., Kay L.	Zeitschrift fur Epileptologie	32
15087100	Clinical correlations of mutations in the SCN1A gene: From febrile seizures to severe myoclonic epilepsy in infancy	Article	2004	Ceulemans B.P.G.M., Claes L.R.F., Lagae L.G.	Pediatric Neurology	30
31439038	Clinical exome sequencing identifies two novel mutations of the SCN1A and SCN2A genes in Moroccan patients with epilepsy: A case series	Article	2019	Sahli M., Zrhidri A., Elaloui S.C., Smaili W., Lyahyai J., Oudghiri F.Z., Sefiani A.	Journal of Medical Case Reports	13
1	Clinical features of Dravet syndrome patients with SCN1A gene mutations	Article	2016	Li D., Huang S.-P., Song T.-T., Yang L., Yang C.-H., Wang X.-Y.	Journal of Xi'an Jiaotong University (Medical Sciences)	37
28012175	Clinical implications of SCN1A missense and truncation variants in a large Japanese cohort with Dravet syndrome	Article	2017	Ishii A., Watkins J.C., Chen D., Hirose S., Hammer M.F.	Epilepsia	58
34673242	Clinical next generation sequencing in developmental and epileptic encephalopathies: Diagnostic relevance of data re-analysis and variants re-interpretation	Article	2021	Eur J Med Genet	Eur J Med Genet	Eur J Med Genet	Salinas V
1	Clinical-electroencephalogram characteristics and its evolutionary process of Dravet syndrome	Article	2010	Qiu J.-M., Liu X.-Y., Zhang Y.-H., Sun H.-H., Yang Z.-X., Ma X.-W.	Chinese Journal of Neurology	43
24412860	Cognitive and adaptive evaluation of 21 consecutive patients with Dravet syndrome	Article	2014	Villeneuve N., Laguitton V., Viellard M., Lépine A., Chabrol B., Dravet C., Milh M.	Epilepsy and Behavior	31
21463278	Cognitive development in children with Dravet syndrome	Article	2011	Ragona F.	Epilepsia	52
21269283	Cognitive development in Dravet syndrome: A retrospective, multicenter study of 26 patients	Article	2011	Ragona F., Granata T., Bernardina B.D., Offredi F., Darra F., Battaglia D., Morbi M., Brazzo D., Cappelletti S., Chieffo D., De Giorgi I., Fontana E., Freri E., Marini C., Toraldo A., Specchio N., Veggiotti P., Vigevano F., Guerrini R., Guzzetta F., Dravet C.	Epilepsia	52
32858363	Cognitive, behavioral, and social functioning in children and adults with Dravet syndrome	Article	2020	Epilepsy Behav	Epilepsy Behav	Epilepsy Behav	Brown A
21668444	Comorbidities and predictors of health-related quality of life in Dravet syndrome	Article	2011	Brunklaus A., Dorris L., Zuberi S.M.	Epilepsia	52
25697436	Complex febrile seizures or dravet syndrome? Description of 3 case reports	Article	2014	Hernández M.C., Pedraza M.H., Mesa T.L., Troncoso M.S.	Revista Chilena de Pediatria	85
17030758	Cryptic chromosome deletions involving SCN1A in severe myoclonic epilepsy of infancy	Article	2006	Madia F., Striano P., Gennaro E., Malacarne M., Paravidino R., Biancheri R., Budetta M., Cilio M.R., Gaggero R., Pierluigi M., Minetti C., Zara F.	Neurology	67
18413471	Cryptogenic epileptic syndromes related to SCN1A: Twelve novel mutations identified	Article	2008	Zucca C., Redaelli F., Epifanio R., Zanotta N., Romeo A., Lodi M., Veggiotti P., Airoldi G., Panzeri C., Romaniello R., De Polo G., Bonanni P., Cardinali S., Baschirotto C., Martorell L., Borgatti R., Bresolin N., Bassi M.T.	Archives of Neurology	65
33674996	De novo homozygous variant of the SCN1A gene in a patient with severe Dravet syndrome complicated by acute encephalopathy	Article	2021	Van L.T.K., Hien H.T.D., Kieu H.T.T., Hieu N.L.T., Vinh L.S., Hoa G., Hang D.T.T.	Neurogenetics	22
11359211	De novo mutations in the sodium-channel gene SCN1A cause severe myoclonic epilepsy of infancy	Article	2001	Claes L., Del-Favero J., Ceulemans B., Lagae L., Van Broeckhoven C., De Jonghe P.	American Journal of Human Genetics	68
26614543	De novo SCN1A gene deletion in therapy-resistant Dravet syndrome	Article	2015	Bene J., Hadzsiev K., Komlósi K., Kövesdi E., Mátyás P., Melegh B.	Orvosi Hetilap	156
12754708	De novo SCN1A mutations are a major cause of severe myoclonic epilepsy of infancy	Article	2003	Claes L., Ceulemans B., Audenaert D., Smets K., Löfgren A., Del-Favero J., Ala-Mello S., Basel-Vanagaite L., Plecko B., Raskin S., Thiry P., Wolf N.I., Van Broeckhoven C., De Jonghe P.	Human Mutation	21
19589774	De novo SCN1A mutations in Dravet syndrome and related epileptic encephalopathies are largely of paternal origin	Article	2010	Heron S.E., Scheffer I.E., Iona X., Zuberi S.M., Birch R., McMahon J.M., Bruce C.M., Berkovic S.F., Mulley J.C.	Journal of Medical Genetics	47
1	De novo sodium channel α1-subunit mutation of monozygotic twins with borderland severe myoclonic epilepsy in infancy	Article	2009	Chen L., Shi Y.-W., Yu M.-J., Deng W.-Y., Liu X.-R., Gao M.-M., Chang H.-H., Long Y.-S., Yi Y.-H., Liao W.-P.	Chinese Journal of Neurology	42
34338318	Defining Dravet syndrome: An essential pre-requisite for precision medicine trials	Article	2021	Li W., Schneider A.L., Scheffer I.E.	Epilepsia	62
1	Definite sudep in dravet syndrome: An adult case report	Article	2015	Dede H.Ö., Gelİşİn Ö., Baykan B., Çağlayan H., Topaloğlu P., Gürses C., Bebek N., Gökyİğİt A.	Journal of Neurological Sciences	32
18539002	Deletion of the SCN gene cluster on 2q24.4 is associated with severe epilepsy: An array-based genotype-phenotype correlation and a comprehensive review of previously published cases	Article	2008	Davidsson J., Collin A., Olsson M.E., Lundgren J., Soller M.	Epilepsy Research	81
28525652	Determination of SCN1A genetic variants in Mexican patients with refractory epilepsy and Dravet syndrome	Article	2017	Genet Mol Res	Genet Mol Res	Genet Mol Res	Jiménez-Arredondo RE
29852413	Diagnostic yield of targeted massively parallel sequencing in children with epileptic encephalopathy	Article	2018	Kothur K., Holman K., Farnsworth E., Ho G., Lorentzos M., Troedson C., Gupta S., Webster R., Procopis P.G., Menezes M.P., Antony J., Ardern-Holmes S., Dale R.C., Christodoulou J., Gill D., Bennetts B.	Seizure	59
22525008	Different degrees of loss of function between GEFS+ and SMEI Nav 1.1 missense mutants at the same residue induced by rescuable folding defects	Article	2012	Epilepsia	Epilepsia	Epilepsia	Sugiura Y
29295803	Differential effects on sodium current impairments by distinct SCN1A mutations in GABAergic neurons derived from Dravet syndrome patients	Article	2018	Kim H.W., Quan Z., Kim Y.-B., Cheong E., Kim H.D., Cho M., Jang J., Yoo Y.R., Lee J.S., Kim J.H., Kim Y.I., Kim D.-S., Kang H.-C.	Brain and Development	40
19694741	Differential role of sodium channels SCN1A and SCN2A gene polymorphisms with epilepsy and multiple drug resistance in the north Indian population	Article	2009	Lakhan R., Kumari R., Misra U.K., Kalita J., Pradhan S., Mittal B.	British Journal of Clinical Pharmacology	68
19359143	Digenic mutations in severe myoclonic epilepsy of infancy	Article	2009	Bolszak M., Anttonen A.-K., Komulainen T., Hinttala R., Pakanen S., Sormunen R., Herva R., Lehesjoki A.-E., Majamaa K., Rantala H., Uusimaa J.	Epilepsy Research	85
1	Double somatic mosaicism in a child with Dravet syndrome	Article	2019	Muir A.M., King C., Schneider A.L., Buttar A.S., Scheffer I.E., Sadleir L.G., Mefford H.C.	Neurology: Genetics	5
22050316	Dravet syndrome - considerable delay in making the diagnosis	Article	2012	Bremer A., Lossius M.I., Nakken K.O.	Acta Neurologica Scandinavica	125
17621480	Dravet syndrome (severe myoclonic epilepsy in infancy): A retrospective study of 16 patients	Article	2007	Korff C., Laux L., Kelley K., Goldstein J., Koh S., Nordli D.	Journal of Child Neurology	22
21463290	Dravet syndrome and parent associations: The IDEA League experience with comorbid conditions, mortality, management, adaptation, and grief	Article	2011	Skluzacek J.V., Watts K.P., Parsy O., Wical B., Camfield P.	Epilepsia	52
21719429	Dravet syndrome as epileptic encephalopathy: evidence from long-term course and neuropathology	Article	2011	Brain	Brain	Brain	Catarino CB
30805006	Dravet Syndrome in Lebanon: First Report on Cases with SCN1A Mutations	Article	2019	Case Rep Med	Case Rep Med	Case Rep Med	Alame S
30321769	Dravet syndrome in South African infants: Tools for an early diagnosis	Article	2018	Esterhuizen A.I., Mefford H.C., Ramesar R.S., Wang S., Carvill G.L., Wilmshurst J.M.	Seizure	62
25772213	Dravet syndrome in Sweden: a population-based study	Article	2015	Dev Med Child Neurol	Dev Med Child Neurol	Dev Med Child Neurol	Rosander C
27209029	Dravet syndrome with favourable cognitive and behavioral development due to a novel SCN1A frameshift mutation	Article	2016	Jiang P., Shen J., Yu Y., Jiang L., Xu J., Xu L., Yu H., Gao F.	Clinical Neurology and Neurosurgery	146
33199159	Dravet syndrome with parkinsonian symptoms and intact dopaminergic neurons: A case report	Article	2021	Kanatani M., Adachi T., Sakata R., Nishimura Y., Saito Y., Maegaki Y., Watanabe Y., Hanajima R.	Brain and Development	43
1	Dravet syndrome: A case report with a new missense substitution as 1274 Tyr > Asp	Article	2011	Moghaddasi M., Mamarabadi M., Ebrahimi A., Tonekaboni S.H., Zainali S., Houshmand M.	Journal of Pediatric Neurology	9
28469861	Dravet syndrome: a new causative SCN1A mutation?	Case Reports	2017	Clin Case Rep	Clin Case Rep	Clin Case Rep	Poryo M
19854600	Dravet syndrome: Early clinical manifestations and cognitive outcome in 37 Italian patients	Article	2010	Ragona F., Brazzo D., Giorgi I.D., Morbi M., Freri E., Teutonico F., Gennaro E., Zara F., Binelli S., Veggiotti P., Granata T.	Brain and Development	32
23808377	Dravet syndrome: New potential genetic modifiers, imaging abnormalities, and ictal findings	Article	2013	Gaily E., Anttonen A.-K., Valanne L., Liukkonen E., Träskelin A.-L., Polvi A., Lommi M., Muona M., Eriksson K., Lehesjoki A.-E.	Epilepsia	54
21906962	Dravet syndrome: Patients with co-morbid SCN1A gene mutations and mitochondrial electron transport chain defects	Article	2012	Craig A.K., De Menezes M.S., Saneto R.P.	Seizure	21
1	Dravet syndrome: Severe myoclonic epilepsy in infancy - Case reports	Article	2014	Danhofer P., Horák O., Fajkusová L., Pavloušková J., Ošlejšková H.	Ceska a Slovenska Neurologie a Neurochirurgie	77
1	Dravet syndrome-A case report from Aseer, Saudi Arabia	Article	2020	Behir M.M., Saeed M., Siddiqui A.F.	Bangladesh Journal of Medical Science	19
1	Dravet's syndrome; A catastrophic epileptic syndrome	Article	2013	Saeed M., Shabbir N., Qadir K.	Pakistan Paediatric Journal	37
28148630	Dysarthria and broader motor speech deficits in Dravet syndrome	Article	2017	Turner S.J., Brown A., Arpone M., Anderson V., Morgan A.T., Scheffer I.E.	Neurology	88
24168886	Early clinical features and diagnosis of Dravet syndrome in 138 Chinese patients with SCN1A mutations	Article	2014	Xu X., Zhang Y., Sun H., Liu X., Yang X., Xiong H., Jiang Y., Bao X., Wang S., Yang Z., Wu Y., Qin J., Lin Q., Wu X.	Brain and Development	36
22071555	Early clinical features in Dravet syndrome patients with and without SCN1A mutations	Article	2012	Petrelli C., Passamonti C., Cesaroni E., Mei D., Guerrini R., Zamponi N., Provinciali L.	Epilepsy Research	99
1	Early-onset eyelid stereotypies are a frequent and distinctive feature in Dravet syndrome	Article	2021	Sala-Coromina J., Raspall-Chaure M., Marcé-Grau A., de la Ossa A.M., Macaya A.	Seizure	92
34521063	Early-onset eyelid stereotypies are a frequent and distinctive feature in Dravet syndrome（不相关）	Article	2021	Seizure	Seizure	Seizure	Sala-Coromina J
26203087	Effect of vaccinations on seizure risk and disease course in Dravet syndrome	Article	2015	Verbeek N.E., Van Der Maas N.A.T., Sonsma A.C.M., Ippel E., Vermeer-De Bondt P.E., Hagebeuk E., Jansen F.E., Geesink H.H., Braun K.P., De Louw A., Augustijn P.B., Neuteboom R.F., Schieving J.H., Stroink H., Vermeulen R.J., Nicolai J., Brouwer O.F., Van Kempen M., De Kovel C.G.F., Kemmeren J.M., Koeleman B.P.C., Knoers N.V., Lindhout D., Gunning W.B., Brilstra E.H.	Neurology	85
23207687	Effect of vagus nerve stimulation in an adult patient with dravet syndrome: Contribution to sudden unexpected death in epilepsy risk reduction?	Article	European Neurology	69	69	69
20447868	Effects of vaccination on onset and outcome of Dravet syndrome: a retrospective study	Article	2010	McIntosh A.M., McMahon J., Dibbens L.M., Iona X., Mulley J.C., Scheffer I.E., Berkovic S.F.	The Lancet Neurology	9
32945537	Efficacy and safety of Fenfluramine hydrochloride for the treatment of seizures in Dravet syndrome: A real-world study	Article	2020	Specchio N., Pietrafusa N., Doccini V., Trivisano M., Darra F., Ragona F., Cossu A., Spolverato S., Battaglia D., Quintiliani M., Luigia Gambardella M., Rosati A., Mei D., Granata T., Dalla Bernardina B., Vigevano F., Guerrini R.	Epilepsia	61
26183863	Efficacy of antiepileptic drugs for the treatment of Dravet syndrome with different genotypes	Article	2016	Shi X.-Y., Tomonoh Y., Wang W.-Z., Ishii A., Higurashi N., Kurahashi H., Kaneko S., Hirose S., The Epilepsy Genetic Study Group, Japan (Chairperson, SK)	Brain and Development	38
29141279	Efficacy of Stiripentol in Dravet Syndrome with or without SCN1A Mutations	Article	2018	J Clin Neurol	J Clin Neurol	J Clin Neurol	Cho MJ
24113539	Efficacy of verapamil as an adjunctive treatment in children with drug-resistant epilepsy: A pilot study	Article	2014	Nicita F., Spalice A., Papetti L., Nikanorova M., Iannetti P., Parisi P.	Seizure	23
21463281	Electrical and autonomic cardiac function in patients with Dravet syndrome	Article	2011	Delogu A.B., Spinelli A., Battaglia D., Dravet C., De Nisco A., Saracino A., Romagnoli C., Lanza G.A., Crea F.	Epilepsia	52
17565594	Electroclinical features of a family with simple febrile seizures and temporal lobe epilepsy associated with SCN1A loss-of-function mutation	Article	2007	Colosimo E., Gambardella A., Mantegazza M., Labate A., Rusconi R., Schiavon E., Annesi F., Cassulini R.R., Carrideo S., Chifari R., Canevini M.P., Canger R., Franceschetti S., Annesi G., Wanke E., Quattrone A.	Epilepsia	48
22019839	Electroencephalographic features in Dravet syndrome: Five-year follow-up study in 22 patients	Article	2012	Specchio N., Balestri M., Trivisano M., Japaridze N., Striano P., Carotenuto A., Cappelletti S., Specchio L.M., Fusco L., Vigevano F.	Journal of Child Neurology	27
25459968	Electroencephalographic features of patients with SCN1A-positive dravet syndrome	Article	2015	Lee H.-F., Chi C.-S., Tsai C.-R., Chen C.-H., Wang C.-C.	Brain and Development	37
21426328	Encephalopathy and SCN1A mutations	Article	2011	Tang S., Lin J.P., Hughes E., Siddiqui A., Lim M., Lascelles K.	Epilepsia	52
24225340	Encephalopathy in children with Dravet syndrome is not a pure consequence of epilepsy	Article	2013	Nabbout R., Chemaly N., Chipaux M., Barcia G., Bouis C., Dubouch C., Leunen D., Jambaqué I., Dulac O., Dellatolas G., Chiron C.	Orphanet Journal of Rare Diseases	8
1	Epilepsy and febrile seizures in 69 families of Dravet'Syndrome (DS) patients with SCN1A mutation	Article	2005	Gaggero R., Mancardi M.M., Striano P., Zara F.	Bollettino - Lega Italiana contro l'Epilessia
17129991	Epilepsy with a de novo missense mutation in the sodium channel a1 subunit: A case report	Article	2006	Stefanaki E., Aggelakou V., Orfanou M., Kokori E., Boutoufianakis S.	Acta Paediatrica, International Journal of Paediatrics	95
29981888	Establishment of a human induced stem cell line (FUi002-A) from Dravet syndrome patient carrying heterozygous R1525X mutation in SCN1A gene	Article	2018	Tanaka Y., Higurashi N., Shirasu N., Yasunaga S., Moreira K.M., Okano H., Hirose S.	Stem Cell Research	31
26841829	Establishment of isogenic iPSCs from an individual with SCN1A mutation mosaicism as a model for investigating neurocognitive impairment in Dravet syndrome	Article	2016	Maeda H., Chiyonobu T., Yoshida M., Yamashita S., Zuiki M., Kidowaki S., Isoda K., Yamakawa K., Morimoto M., Nakahata T., Saito M.K., Hosoi H.	Journal of Human Genetics	61
21858011	Evaluation of candidate genes from orphan FEB and GEFS+ loci by analysis of human brain gene expression atlases	Article	PLoS ONE	6	6	6
29745119	Expanding spectrum of SCN1A-related phenotype with novel mutations	Article	2017	Hız-Kurul S., Gürsoy S., Ayanoğlu M., Yiş U., Erçal D.	Turkish Journal of Pediatrics	59
17054684	Familial occurrence of febrile seizures and epilepsy in severe myoclonic epilepsy of infancy (SMEI) patients with SCN1A mutations	Article	2006	Margherita Mancardi M., Striano P., Gennaro E., Madia F., Paravidino R., Scapolan S., Dalla Bernardina B., Bertini E., Bianchi A., Capovilla G., Darra F., Elia M., Freri E., Gobbi G., Granata T., Guerrini R., Pantaleoni C., Parmeggiani A., Romeo A., Santucci M., Vecchi M., Veggiotti P., Vigevano F., Pistorio A., Gaggero R., Zara F.	Epilepsia	47
1	Familial SCN1A missense mutation over three generations, from febrile seizures to severe myoclonic epilepsy in infancy	Article	2011	Hofmann C., Baur M.-O., Skladny H.	Journal of Pediatric Neurology	9
12773292	Familial severe myoclonic epilepsy of infancy: Truncation of Nav1.1 and genetic heterogeneity	Article	2003	Gennaro E., Veggiotti P., Malacarne M., Madia F., Cecconi M., Cardinali S., Cassetti A., Cecconi I., Bertini E., Bianchi A., Gobbi G., Zara F.	Epileptic Disorders	5
28330972	Fatal cerebral edema with status epilepticus in children with dravet syndrome: Report of 5 cases	Article	2017	Myers K.A., McMahon J.M., Mandelstam S.A., Mackay M.T., Kalnins R.M., Leventer R.J., Scheffer I.E.	Pediatrics	139
1	Fatal status epilepticus in dravet syndrome	Article	2020	Liso P.D., Pironi V., Mastrangelo M., Battaglia D., Craiu D., Trivisano M., Specchio N., Nabbout R., Vigevano F.	Brain Sciences	10
27197941	Five-year extended follow-up status of 10 patients with Dravet syndrome treated with fenfluramine	Article	2016	Ceulemans B., Schoonjans A.-S., Marchau F., Paelinck B.P., Lagae L.	Epilepsia	57
20110217	Four novel SCN1A mutations in turkish patients with severe myoclonic epilepsy of infancy (SMEI)	Article	2010	Arlier Z., Bayri Y., Kolb L.E., Erturk O., Ozturk A.K., Bayrakli F., Bilguvar K., Moliterno J.A., Dervent A., Demirbilek V., Yalcinkaya C., Korkmaz B., Tuysuz B., Gunel M.	Journal of Child Neurology	25
11940708	Frequent mutations of SCN1A in severe myoclonic epilepsy in infancy	Article	2002	Sugawara T., Mazaki-Miyazaki E., Fukushima K., Shimomura J., Fujiwara T., Hamano S., Inoue Y., Yamakawa K.	Neurology	58
26188943	From focal epilepsy to dravet syndrome –heterogeneity of the phenotype due to SCN1A mutations of the p.Arg1596 amino acid residue in the nav1.1 subunit	Article	2015	Hoffman-Zacharska D., Szczepanik E., Terczynska I., Goszczanska-Ciuchta A., Zalewska-Miszkurka Z., Tataj R., Bal J.	Neurologia i Neurochirurgia Polska	49
24623842	GABRA1 and STXBP1: Novel genetic causes of Dravet syndrome	Article	2014	Carvill G.L., Weckhuysen S., McMahon J.M., Hartmann C., Møller R.S., Hjalgrim H., Cook J., Geraghty E., O'Roak B.J., Petrou S., Clarke A., Gill D., Sadleir L.G., Muhle H., Von Spiczak S., Nikanorova M., Hodgson B.L., Gazina E.V., Suls A., Shendure J., Dibbens L.M., De Jonghe P., Helbig I., Berkovic S.F., Scheffer I.E., Mefford H.C.	Neurology	82
31582194	Gait abnormalities in people with Dravet syndrome: A cross-sectional multi-center study	Article	2019	Di Marco R., Hallemans A., Bellon G., Ragona F., Piazza E., Granata T., Ceulemans B., Schoonjans A.-S., Van de Walle P., Darra F., Dalla Bernardina B., Vecchi M., Sawacha Z., Scarpa B., Masiero S., Benedetti M.G., Del Felice A.	European Journal of Paediatric Neurology	23
34163418	Gene and Phenotype Expansion of Unexplained Early Infantile Epileptic Encephalopathy	Article	2021	Front Neurol	Front Neurol	Front Neurol	Liu X
27781031	Gene Panel Testing in Epileptic Encephalopathies and Familial Epilepsies	Article	2016	Mol Syndromol	Mol Syndromol	Mol Syndromol	M?ller RS
21335542	Generalized periodic epileptiform discharges in a child with Dravet syndrome	Article	2011	Moseley B.D., Wirrell E.C., Nickels K.	Journal of Child Neurology	26
1	Genetic analysis of 5'-untranslated region of voltage-gated sodium channel alpha 1-subunit gene in Dravet syndrome	Article	2010	Lin S.-P., Long Y.-S., Shi Y.-W., Liu X.-R., Chen L., Yu M.-J., Liao W.-P.	Chinese Journal of Neurology	43
23225037	Genetic and phenotypic characteristics of SCN1A mutations in Dravet syndrome	Article	2012	Xu X.-J., Zhang Y.-H., Sun H.-H., Liu X.-Y., Jiang Y.-W., Wu X.-R.	Chinese Journal of Medical Genetics	29
34568804	Genetic cause of epilepsy in a Greek cohort of children and young adults with heterogeneous epilepsy syndromes	Article	2021	Epilepsy Behav Rep	Epilepsy Behav Rep	Epilepsy Behav Rep	Zaganas I
1	Genetic characteristics of SCNIA gene in familial severe myoclonic epilepsy in infancy	Article	2009	Mai Y.-Z., Liu X.-R., Shi Y.-W., Deng W.-Y., Yu M.-J., Chen L., Chang H.-H., Liao W.-P.	Chinese Journal of Neurology	42
33067208	Genetic Diagnosis of Dravet Syndrome Using Next Generation Sequencing-Based Epilepsy Gene Panel Testing	Article	2020	Lee J., Lee C., Park W.-Y., Lee J.	Annals of clinical and laboratory science	50
22147323	Genetic diagnosis of severe myoclonic epilepsy of infancy (Dravet syndrome) with SCN1A mutations in the Hong Kong Chinese patients	Article	2011	Mak C.M., Chan K.Y., Yau E.K.C., Chen S.P.L., Siu W.K., Law C.Y., Lam C.W., Chan A.Y.W.	Hong Kong Medical Journal	17
33902251	Genetics Analysis of patients with Dravet syndrome due to mosaicism variation of paternal SCN1A gene	Article	2021	Huo M., Niu W., Xu J., Shi H., Liu Y., Zhang Y.	National Medical Journal of China	101
34226156	Genetics and clinical correlation of Dravet syndrome and its mimics – experience of a tertiary center in Taiwan	Article	2021	Liu Y.-H., Cheng Y.-T., Tsai M.-H., Chou I.-J., Hung P.-C., Hsieh M.-Y., Wang Y.-S., Chen Y.-J., Kuo C.-Y., Lin J.-J., Wang H.-S., Lin K.-L.	Pediatrics and Neonatology	62
34145886	Genome sequencing of 320 Chinese children with epilepsy: a clinical and molecular study	Article	2021	Brain	Brain	Brain	Zou D
29142202	Genomic mosaicism in paternal sperm and multiple parental tissues in a Dravet syndrome cohort	Article	2017	Yang X., Liu A., Xu X., Yang X., Zeng Q., Ye A.Y., Yu Z., Wang S., Huang A.Y., Wu X., Wu Q., Wei L., Zhang Y.	Scientific Reports	7
21248271	Genotype-phenotype associations in SCN1A-related epilepsies	Article	2011	Neurology	Neurology	Neurology	Zuberi SM
32593896	Genotype-phenotype correlates of infantile-onset developmental & epileptic encephalopathy syndromes in South India: A single centre experience	Article	2020	Mitta N., Menon R.N., McTague A., Radhakrishnan A., Sundaram S., Cherian A., Madhavilatha G.K., Mannan A.U., Nampoothiri S., Thomas S.V.	Epilepsy Research	166
29031192	Growth and endocrine function in children with Dravet syndrome	Article	2017	Eschbach K., Scarbro S., Juarez-Colunga E., Allen V., Hsu S., Knupp K.	Seizure	52
19563349	Hemiconvulsion-hemiplegia syndrome in a patient with severe myoclonic epilepsy in infancy	Article	2009	Sakakibara T., Nakagawa E., Saito Y., Sakuma H., Komaki H., Sugai K., Sasaki M., Kurahashi H., Hirose S.	Epilepsia	50
34379890	High FGF-21 level in a cohort of 22 patients with Dravet Syndrome—Possible relationship with the disease outcomes	Article	2021	Kwong A.K.-Y., Wong V.C.-N., Wong S.S.-N., Chu V.L.-Y., Koene S., Smeitink J., Fung C.-W.	Epilepsia Open
25795284	Homozygous mutations in the SCN1A gene associated with genetic epilepsy with febrile seizures plus and Dravet syndrome in 2 families	Article	2015	Brunklaus A., Ellis R., Stewart H., Aylett S., Reavey E., Jefferson R., Jain R., Chakraborty S., Jayawant S., Zuberi S.M.	European Journal of Paediatric Neurology	19
23034800	Human herpesvirus 6-associated encephalopathy in a child with dravet syndrome	Article	2013	Hiraiwa-Sofue A., Ito Y., Ohta R., Kimura H., Okumura A.	Neuropediatrics	44
25046982	Ictal ontogeny in Dravet syndrome	Article	2015	Kim S.H., Nordli D.R., Berg A.T., Koh S., Laux L.	Clinical Neurophysiology	126
22848613	Identification of SCN1A and PCDH19 mutations in Chinese children with Dravet syndrome	Article	2012	Kwong A.K.-Y., Fung C.-W., Chan S.-Y., Wong V.C.-N.	PLoS ONE	7
32375095	Impact of childhood Dravet syndrome on care givers of patients with DS, a major impact on mothers	Article	2020	Nabbout R., Dirani M., Teng T., Bianic F., Martin M., Holland R., Chemaly N., Coque N.	Epilepsy and Behavior	108
28356460	Impaired intracortical inhibition demonstrated in vivo in people with Dravet syndrome	Article	2017	Stern W.M., Sander J.W., Rothwell J.C., Sisodiya S.M.	Neurology	88
30735520	In vivo, in vitro and in silico correlations of four de novo SCN1A missense mutations	Article	2019	Nissenkorn A., Almog Y., Adler I., Safrin M., Brusel M., Marom M., Bercovich S., Yakubovich D., Tzadok M., Ben-Zeev B., Rubinstein M.	PLoS ONE	14
29750338	Influence of contraindicated medication use on cognitive outcome in Dravet syndrome and age at first afebrile seizure as a clinical predictor in SCN1A-related seizure phenotypes	Article	2018	de Lange I.M., Gunning B., Sonsma A.C.M., van Gemert L., van Kempen M., Verbeek N.E., Nicolai J., Knoers N.V.A.M., Koeleman B.P.C., Brilstra E.H.	Epilepsia	59
13129592	Is phenotype difference in severe myoclonic epilepsy in infancy related to SCN1A mutations?	Article	2003	Ohmori I., Ohtsuka Y., Ouchida M., Ogino T., Maniwa S., Shimizu K., Oka E.	Brain and Development	25
34268891	Late diagnoses of Dravet syndrome: How many individuals are we missing?	Article	2021	Epilepsia Open	Epilepsia Open	Epilepsia Open	Silvennoinen K
30870727	Longitudinal change of cardiac electrical and autonomic function and potential risk factors in children with dravet syndrome	Article	2019	Lyu S.Y., Nam S.O., Lee Y.-J., Kim G., Kim Y.A., Kong J., Ko A., Kim Y.M., Yeon G.M.	Epilepsy Research	152
34692895	Long-term Efficacy of Perampanel in a Child with Dravet Syndrome	Article	2021	Child Neurol Open	Child Neurol Open	Child Neurol Open	Turón-Vi?as E
23916143	Low incidence of SCN1A genetic mutation in patients with hemiconvulsion-hemiplegia-epilepsy syndrome	Article	2013	Kim D.W., Lim B.C., Kim K.J., Chae J.H., Lee R., Lee S.K.	Epilepsy Research	106
21620771	Low long-term efficacy and tolerability of add-on rufinamide in patients with Dravet syndrome	Article	2011	Mueller A., Boor R., Coppola G., Striano P., Dahlin M., von Stuelpnagel C., Lotte J., Staudt M., Kluger G.	Epilepsy and Behavior	21
29265387	Marked efficacy of combined three-drug therapy (Sodium Valproate, Topiramate and Stiripentol) in a patient with Dravet syndrome	Article	Journal of Clinical Pharmacy and Therapeutics	43	43	43
20522430	Mechanisms for variable expressivity of inherited SCN1A mutations causing Dravet syndrome	Article	2010	Depienne C., Trouillard O., Gourfinkel-An I., Saint-Martin C., Bouteiller D., Graber D., Barthez-Carpentier M.-A., Gautier A., Villeneuve N., Dravet C., Livet M.-O., Rivier-Ringenbach C., Adam C., Dupont S., Baulac S., Héron D., Nabbout R., LeGuern E.	Journal of Medical Genetics	47
18479393	Microchromosomal deletions involving SCN1A and adjacent genes in severe myoclonic epilepsy in infancy	Article	2008	Wang J.-W., Kurahashi H., Ishii A., Kojima T., Ohfu M., Inoue T., Ogawa A., Yasumoto S., Oguni H., Kure S., Fujii T., Ito M., Okuno T., Shirasaka Y., Natsume J., Hasegawa A., Konagaya A., Kaneko S., Hirose S.	Epilepsia	49
23485646	Molecular aspects of Dravet syndrome patients in Taiwan	Article	2013	Lin W.-D., Chang K.-P., Wang C.-H., Chen S.-J., Fan P.-C., Weng W.-C., Lin W.-C., Tsai Y., Tsai C.-H., Chou I.-C., Tsai F.-J.	Clinica Chimica Acta	421
32702657	Molecular diagnosis of epileptic encephalopathy of the first year of life applying a customized gene panel in a group of Argentinean patients	Article	2020	Juanes M., Veneruzzo G., Loos M., Reyes G., Araoz H.V., Garcia F.M., Gomez G., Alonso C.N., Chertkoff L.P., Caraballo R.	Epilepsy and Behavior	111
18639757	Monozygotic twins with severe myoclonic epilepsy in infancy discordant for clinical features	Article	2008	Pediatr Neurol	Pediatr Neurol	Pediatr Neurol	Miyama S
17054697	Mosaic SCN1A mutation in familial severe myoclonic epilepsy of infancy	Article	2006	Marini C., Mei D., Helen Cross J., Guerrini R.	Epilepsia	47
20562086	Mosaicism of a missense SCN1A mutation and Dravet syndrome in a Roma/Gypsy family	Article	2010	Azmanov D.N., Zhelyazkova S., Dimova P.S., Radionova M., Bojinova V., Florez L., Smith S.J., Tournev I., Jablensky A., Mulley J., Scheffer I., Kalaydjieva L., Sander J.W.	Epileptic Disorders	12
29460957	Mosaicism of de novo pathogenic SCN1A variants in epilepsy is a frequent phenomenon that correlates with variable phenotypes	Article	2018	de Lange I.M., Koudijs M.J., van 't Slot R., Gunning B., Sonsma A.C.M., van Gemert L.J.J.M., Mulder F., Carbo E.C., van Kempen M.J.A., Verbeek N.E., Nijman I.J., Ernst R.F., Savelberg S.M.C., Knoers N.V.A.M., Brilstra E.H., Koeleman B.P.C.	Epilepsia	59
27316242	Motor neuropathy contributes to crouching in patients with Dravet syndrome	Article	2016	Gitiaux C., Chemaly N., Quijano-Roy S., Barnerias C., Desguerre I., Hully M., Chiron C., Dulac O., Nabbout R.	Neurology	87
28126647	Movement-activated cortical myoclonus in Dravet syndrome	Article	2017	Canafoglia L., Ragona F., Panzica F., Piazza E., Freri E., Binelli S., Scaioli V., Avanzini G., Granata T., Franceschetti S.	Epilepsy Research	130
33478845	Multicenter prospective longitudinal study in 34 patients with Dravet syndrome: Neuropsychological development in the first six years of life	Article	2021	Battaglia D., Chieffo D., Lucibello S., Marini C., Sibilia V., Mei D., Darra F., Offredi F., Fontana E., Specchio N., Cappelletti S., Granata T., Ragona F., Patrini M., Baglietto M.G., Prato G., Ferrari A., Vigevano F., Mercuri E., Bernardina B.D., Guerrini R., Dravet C., Guzzetta F.	Brain and Development	43
26802095	Multiplex families with epilepsy: Success of clinical and molecular genetic characterization	Article	2016	Afawi Z., Oliver K.L., Kivity S., Mazarib A., Blatt I., Neufeld M.Y., Helbig K.L., Goldberg-Stern H., Misk A.J., Straussberg R., Walid S., Mahajnah M., Lerman-Sagie T., Ben-Zeev B., Kahana E., Masalha R., Kramer U., Ekstein D., Shorer Z., Wallace R.H., Mangelsdorf M., MacPherson J.N., Carvill G.L., Mefford H.C., Jackson G.D., Scheffer I.E., Bahlo M., Gecz J., Heron S.E., Corbett M., Mulley J.C., …	Neurology	86
23517304	Musicogenic seizures in dravet syndrome	Article	2013	Sanchez-Carpintero R., Patiño-Garcia A., Urrestarazu E.	Developmental Medicine and Child Neurology	55
19350499	Mutation analysis of the SCN1A gene in severe myoclonic epilepsy of infancy	Article	2009	Sun H.-H., Zhang Y.-H., Liu X.-Y., Ma X.-W., Wu H.-S., Xu K.-M., Qin J., Qi Y., Wu X.-R.	Chinese Journal of Medical Genetics	26
1	Mutation screening of SCN1A 3' untranslated region on Dravet syndrome patients and functional analysis of the variant	Article	2017	Zeng T., Xiao X., Min F., Chen S., Li Z., Pan X., Zhou J., Long Y., Liao W.	Chinese Journal of Neurology	50
31765958	Mutation spectrum of the SCN1A gene in a Hungarian population with epilepsy	Article	2020	Till Á., Zima J., Fekete A., Bene J., Czakó M., Szabó A., Melegh B., Hadzsiev K.	Seizure	74
19522081	Mutational analysis of the SCN1A, SCN1B and GABRG2 genes in 150 Italian patients with idiopathic childhood epilepsies	Letter	2009	Orrico A., Galli L., Grosso S., Buoni S., Pianigiani R., Balestri P., Sorrentino D.	Clinical Genetics	75
14738421	Mutations of Neuronal Voltage-gated Na+ Channel α1 Subunit Gene SCN1A in Core Severe Myoclonic Epilepsy in Infancy (SMEI) and in Borderline SMEI (SMEB)	Article	2004	Fukuma G., Oguni H., Shirasaka Y., Watanabe K., Miyajima T., Yasumoto S., Ohfu M., Inoue T., Watanachai A., Kira R., Matsuo M., Muranaka H., Sofue F., Zhang B., Kaneko S., Mitsudome A., Hirose S.	Epilepsia	45
12566275	Mutations of sodium channel α subunit type 1 (SCN1A) in intractable childhood epilepsies with frequent generalized tonic-clonic seizures	Article	2003	Fujiwara T., Sugawara T., Mazaki-Miyazaki E., Takahashi Y., Fukushima K., Watanabe M., Hara K., Morikawa T., Yagi K., Yamakawa K., Inoue Y.	Brain	126
28233668	Myoclonic Absence Seizures in Dravet Syndrome	Article	2017	Myers K.A., Scheffer I.E.	Pediatric Neurology	70
21474289	Neuropsychological development in children with Dravet syndrome	Article	2011	Epilepsy Res	Epilepsy Res	Epilepsy Res	Chieffo D
20135149	Novel human pathological mutations. Gene symbol: SCN1A. Disease: Myoclonic epilepsy of infancy	Article	2010	Hum Genet	Hum Genet	Hum Genet	Rocca FE
19694011	Novel human pathological mutations. Gene symbol: SCN1A. Disease: severe myoclonic epilepsy of infancy.	Article	2009	Provenzano G., Mannarino E., Annesi F., De Marco E.V., Rocca F.E., Greco V., Scornaienchi V., Tarantino P., Civitelli D., Quattrone A., Tortorella G., Annesi G.	Human genetics	126
20600615	Novel mutation of SCN1A in familial generalized epilepsy with febrile seizures plus	Article	2010	Li N., Zhang J., Guo J.-F., Yan X.-X., Xia K., Tang B.-S.	Neuroscience Letters	480
29314583	Novel mutations and phenotypes of epilepsy-associated genes in epileptic encephalopathies	Article	2018	Zhou P., He N., Zhang J.-W., Lin Z.-J., Wang J., Yan L.-M., Meng H., Tang B., Li B.-M., Liu X.-R., Shi Y.-W., Zhai Q.-X., Yi Y.-H., Liao W.-P.	Genes, Brain and Behavior	17
28540321	Novel SCN1A and GABRA1 Gene Mutations With Diverse Phenotypic Features and the Question on the Existence of a Broader Spectrum of Dravet Syndrome	Article	2017	Child Neurol Open	Child Neurol Open	Child Neurol Open	Gontika MP
18680191	Novel SCN1A frameshift mutation with absence of truncated Nav1.1 protein in severe myoclonic epilepsy of infancy	Letter	2008	McArdle E.J., Kunic J.D., George Jr. A.L.	American Journal of Medical Genetics, Part A	146
1	Novel SCN1A mutation causing Dravet syndrome: Case report and review of the literature	Article	2011	Strader S., Benson R., Joshi C.	Journal of Pediatric Neurology	9
19563458	Novel SCN1A mutations in Indonesian patients with severe myoclonic epilepsy in infancy	Article	2010	Herini E.S., Gunadi, Van Kempen M.J.A., Yusoff S., Sutaryo, Sunartini, Patria S.Y., Matsuo M., Lindhout D., Nishio H.	Pediatrics International	52
27045673	Novel SCN1A variants in Dravet syndrome and evaluating a wide approach of patient selection	Article	2016	Surovy M., Soltysova A., Kolnikova M., Sykora P., Ilencikova D., Ficek A., Radvanszky J., Kadasi L.	General Physiology and Biophysics	35
22206733	On the likelihood of SCN1A microdeletions or duplications in Dravet syndrome with missense mutation	Article	2012	Shi X., Wang J., Kurahashi H., Ishii A., Higurashi N., Kaneko S., Hirose S.	Brain and Development	34
30527252	Outcomes and comorbidities of SCN1A-related seizure disorders	Article	2019	de Lange I.M., Gunning B., Sonsma A.C.M., van Gemert L., van Kempen M., Verbeek N.E., Sinoo C., Nicolai J., Knoers N.V.A.M., Koeleman B.P.C., Brilstra E.H.	Epilepsy and Behavior	90
16541393	Parental mosaicism can cause recurrent transmission of SCN1A mutations associated with severe myoclonic epilepsy of infancy.	Article	2006	Depienne C., Arzimanoglou A., Trouillard O., Fedirko E., Baulac S., Saint-Martin C., Ruberg M., Dravet C., Nabbout R., Baulac M., Gourfinkel-An I., LeGuern E.	Human mutation	27
27021235	Parental mosaicism in another case of Dravet syndrome caused by a novel SCN1A deletion: A case report	Article	2016	Sharkia R., Hengel H., Schöls L., Athamna M., Bauer P., Mahajnah M.	Journal of Medical Case Reports	10
28982531	Parental Perception of Comorbidities in Children With Dravet Syndrome	Article	2017	Knupp K.G., Scarbro S., Wilkening G., Juarez-Colunga E., Kempe A., Dempsey A.	Pediatric Neurology	76
19673951	Parental SCN1A mutation mosaicism in familial Dravet syndrome	Article	2009	Selmer K.K., Eriksson A.S., Brandal K., Egeland T., Tallaksen C., Undlien D.E.	Clinical Genetics	76
12907273	Paroxysmal movement disorders in severe myoclonic epilepsy in infancy	Article	2003	Ohtsuka Y., Ohmori I., Ogino T., Ouchida M., Shimizu K., Oka E.	Brain and Development	25
29408779	Pathogenic significance of SCN1A splicing variants causing Dravet syndrome: Improving diagnosis with targeted sequencing for variants by in silico analysis	Article	2018	Mahdieh N., Mikaeeli S., Badv R.S., Shirazi A.G., Maleki M., Rabbani B.	Clinical Neurology and Neurosurgery	166
27389706	Patients with dravet syndrome in the era of stiripentol: A French cohort cross-sectional study	Article（排除）	2016	De Liso P., Chemaly N., Laschet J., Barnerias C., Hully M., Leunen D., Desguerre I., Chiron C., Dulac O., Nabbout R.	Epilepsy Research	125
28042998	Photosensitivity in Dravet syndrome is under-recognized and related to prognosis	Article	2017	Verbeek N., Kasteleijn-Nolst Trenité D., Wassenaar M., van Campen J., Sonsma A., Gunning W.B., de Weerd A., Knoers N., Spetgens W., Gutter T., Leijten F., Brilstra E.	Clinical Neurophysiology	128
27465585	Pitfalls in genetic testing: the story of missed SCN1A mutations	Article	2016	Mol Genet Genomic Med	Mol Genet Genomic Med	Mol Genet Genomic Med	Djémié T
26995069	Prevalence and Characteristics of Vaccination Triggered Seizures in Dravet Syndrome in Hong Kong: A Retrospective Study	Article	2016	Wong P.T.Y., Wong V.C.-N.	Pediatric Neurology	58
23195492	Prevalence of SCN1A mutations in children with suspected Dravet syndrome and intractable childhood epilepsy	Article	2012	Wang J.-W., Shi X.-Y., Kurahashi H., Hwang S.-K., Ishii A., Higurashi N., Kaneko S., Hirose S.	Epilepsy Research	102
23762420	Prevalence of SCN1A-Related Dravet Syndrome among Children Reported with Seizures following Vaccination: A Population-Based Ten-Year Cohort Study	Article	2013	Verbeek N.E., van der Maas N.A.T., Jansen F.E., van Kempen M.J.A., Lindhout D., Brilstra E.H.	PLoS ONE	8
1	Prognosis and follow-up study of 670 pediatric patients with Dravet syndrome [Dravet综合征670例患儿预后随访研究]	Article	2020	Tian X., Zhang Y., Xu X., Yang X., Liu A., Zeng Q., Zhang J., Yang Y., Jiang Y.	Chinese Journal of Applied Clinical Pediatrics	35
22719002	Prognostic, clinical and demographic features in SCN1A mutation-positive Dravet syndrome	Article	2012	Brain	Brain	Brain	Brunklaus A
22409937	Progressive gait deterioration in adolescents with Dravet syndrome	Article	2012	Rodda J.M., Scheffer I.E., McMahon J.M., Berkovic S.F., Graham H.K.	Archives of Neurology	69
29990707	Prospective study of the efficacy of a ketogenic diet in 20 patients with Dravet syndrome	Article	2018	Yan N., Xin-Hua W., Lin-Mei Z., Yi-Ming C., Wen-Hui L., Yuan-Feng Z., Shui-Zhen Z.	Seizure	60
23065439	QT and P wave dispersion and heart rate variability in patients with Dravet syndrome	Article	2013	Acta Neurol Belg	Acta Neurol Belg	Acta Neurol Belg	Ergul Y
30353809	Randomized controlled trial of melatonin for sleep disturbance in dravet syndrome: The DREAMS study	Article	2018	Myers K.A., Davey M.J., Ching M., Ellis C., Grinton B.E., Roten A., Lightfoot P.A., Scheffer I.E.	Journal of Clinical Sleep Medicine	14
28686619	Rare variants of small effect size in neuronal excitability genes influence clinical outcome in Japanese cases of SCN1A truncation-positive Dravet syndrome	Article	2017	Hammer M.F., Ishii A., Johnstone L., Tchourbanov A., Lau B., Sprissler R., Hallmark B., Zhang M., Zhou J., Watkins J., Hirose S.	PLoS ONE	12
18031552	Rasmussen encephalitis associated with SCN1A mutation	Article	2008	Ohmori I., Ouchida M., Kobayashi K., Jitsumori Y., Inoue T., Shimizu K., Matsui H., Ohtsuka Y., Maegaki Y.	Epilepsia	49
31814998	Re-annotation of 191 developmental and epileptic encephalopathy-associated genes unmasks de novo variants in SCN1A	Article	2019	NPJ Genom Med	NPJ Genom Med	NPJ Genom Med	Steward CA
16458823	Recurrent de novo mutations of SCN1A in severe myoclonic epilepsy of infancy	Article	2006	Kearney J.A., Wiste A.K., Stephani U., Trudeau M.M., Siegel A., Ramachandrannair R., Elterman R.D., Muhle H., Reinsdorf J., Shields W.D., Meisler M.H., Escayg A.	Pediatric Neurology	34
26889571	Reflex Seizures Triggered by Diaper Change in Dravet Syndrome	Article	2016	Subki A.H., Alasmari A.S., Jan F.M., Moria F.A., Jan M.M.	Canadian Journal of Neurological Sciences	43
18275929	Refractory, life-threatening status epilepticus in a 3-year-old girl	Article	2008	Lancet Neurol	Lancet Neurol	Lancet Neurol	Striano P
21480880	Retrospective multiinstitutional study of the prevalence of early death in Dravet syndrome	Article	2011	Sakauchi M., Oguni H., Kato I., Osawa M., Hirose S., Kaneko S., Takahashi Y., Takayama R., Fujiwara T.	Epilepsia	52
16505326	SCN1A (2528delG) novel truncating mutation with benign outcome of severe myoclonic epilepsy of infancy	Article	2006	Buoni S., Orrico A., Galli L., Zannolli R., Burroni L., Hayek J., Fois A., Sorrentino V.	Neurology	66
19400878	SCN1A duplications and deletions detected in Dravet syndrome: Implications for molecular diagnosis	Article	2009	Marini C., Scheffer I.E., Nabbout R., Mei D., Cox K., Dibbens L.M., McMahon J.M., Iona X., Carpintero R.S., Elia M., Cilio M.R., Specchio N., Giordano L., Striano P., Gennaro E., Cross J.H., Kivity S., Neufeld M.Y., Afawi Z., Andermann E., Keene D., Dulac O., Zara F., Berkovic S.F., Guerrini R., Mulley J.C.	Epilepsia	50
30779207	SCN1A gain of function in early infantile encephalopathy	Article	2019	Berecki G., Bryson A., Terhag J., Maljevic S., Gazina E.V., Hill S.L., Petrou S.	Annals of Neurology	85
28079314	SCN1A Gene Mutation and Adaptive Functioning in 18 Vietnamese Children with Dravet Syndrome	Article	2017	J Clin Neurol	J Clin Neurol	J Clin Neurol	Do TT
27236449	SCN1A gene sequencing in 46 Turkish epilepsy patients disclosed 12 novel mutations	Article	2016	Usluer S., Salar S., Arslan M., Yiş U., Kara B., Tektürk P., Baykan B., Meral C., Türkdoǧan D., Bebek N., Yalçin Çapan Ö., Gündoǧdu Eken A., Çaǧlayan S.H.	Seizure	39
1	SCN1A Genetic Test for Dravet Syndrome (Severe Myoclonic Epilepsy of Infancy and its Clinical Subtypes) for use in the Diagnosis, Prognosis, Treatment and Management of Dravet Syndrome	Article	2013	Stenhouse S.A.R., Ellis R., Zuberi S.	PLoS Currents
15944908	SCN1A mutation analysis in myoclonic astatic epilepsy and severe idiopathic generalized epilepsy of infancy with generalized tonic-clonic seizures	Article	2005	Ebach K., Joos H., Doose H., Stephani U., Kurlemann G., Fiedler B., Hahn A., Hauser E., Hundt K., Holthausen H., Müller U., Neubauer B.A.	Neuropediatrics	36
17679682	SCN1A mutation associated with atypical panayiotopoulos syndrome	Article	2007	Grosso S., Orrico A., Galli L., Di Bartolo R., Sorrentino V., Balestri P.	Neurology	69
17054696	SCN1A mutation mosaicism in a family with severe myoclonic epilepsy in infancy	Article	2006	Morimoto M., Mazaki E., Nishimura A., Chiyonobu T., Sawai Y., Murakami A., Nakamura K., Inoue I., Ogiwara I., Sugimoto T., Yamakawa K.	Epilepsia	47
1	SCN1A mutation positive Dravet syndrome, genetic aspects and clinical experiences [Syndróm Dravetovej s mutáciou v SCN1A géne, genetické aspekty a klinické skúsenosti]	Article	2018	Ceská K., Aulická Š., Danhofer P., Horák O., Fajkusová L., Pouchlá S., Ošlejšková H.	Ceska a Slovenska Neurologie a Neurochirurgie	81
23586701	SCN1A testing for epilepsy: Application in clinical practice	Article	2013	Hirose S., Scheffer I.E., Marini C., De Jonghe P., Andermann E., Goldman A.M., Kauffman M., Tan N.C.K., Lowenstein D.H., Sisodiya S.M., Ottman R., Berkovic S.F.	Epilepsia	54
30921204	SCN1B and SCN2B gene variants analysis in dravet syndrome patients Analysis of 22 cases	Article	2019	Gong J.-E., Liao H.-M., Long H.-Y., Li X.-M., Long L.-L., Zhou L., Gu W.-P., Lu S.-H., Qu Q., Yang L.-M., Xiao B., Qu J.	Medicine (United States)	98
25667824	Seizure control in a patient with Dravet syndrome and cystic fibrosis	Article	2013	Epilepsy Behav Case Rep	Epilepsy Behav Case Rep	Epilepsy Behav Case Rep	Schmalbach B
29571173	Seizure Freedom in Patients with Dravet Syndrome with Contraceptives: A Case Report with Two Patients	Article	Neuropediatrics	49	49	49
26021464	Seizure precipitants in Dravet syndrome: What events and activities are specifically provocative compared with other epilepsies?	Article	2015	Verbeek N.E., Wassenaar M., van Campen J.S., Sonsma A., Gunning B., Knoers N., Lindhout D., Jansen F.E., Leijten F., Brilstra E.H., Kasteleijn-Nolst Trenité D.	Epilepsy and Behavior	47
1	Seizure reduction with fluoxetine in an adult woman with Dravet syndrome	Article	2014	Meador K.J.	Epilepsy and Behavior Case Reports	2
1	Severe myoclonic epilepsy in infancy - Adult phenotype with bradykinesia, hypomimia, and perseverative behavior: Report of five cases	Article	2011	Martin P., Rautenstrau B., Abicht A., Fahrbach J., Koster S.	Molecular Syndromology	1
15526956	Severe myoclonic epilepsy in infancy: Toward an optimal treatment	Article	2004	Ceulemans B., Boel M., Claes L., Dom L., Willekens H., Thiry P., Lagae L., Eiken D.	Journal of Child Neurology	19
22028529	Severe myoclonic epilepsy of infancy (Dravet syndrome): Clinical and genetic features of nine Turkish patients	Article	2011	Ann Indian Acad Neurol	Ann Indian Acad Neurol	Ann Indian Acad Neurol	Ozmen M
17190949	Severe myoclonic epilepsy of infancy (Dravet syndrome): Recognition and diagnosis in adults	Article	2006	Jansen F.E., Sadleir L.G., Harkin L.A., Vadlamudi L., McMahon J.M., Mulley J.C., Scheffer I.E., Berkovic S.F.	Neurology	67
1	Severe myoclonic epilepsy of infancy: Seizure reduction during adjunctive eslicarbazepine in two cases	Article	2015	Buoni S., Geronzi U., Orsi A., Hayek Y.	Epilepsy and Behavior Case Reports	4
17105460	Severe myoclonic epilepsy of infants (Dravet syndrome): Natural history and neuropsychological findings	Article	2006	Wolff M., Cassé-Perrot C., Dravet C.	Epilepsia	47
29329111	Severe peri-ictal respiratory dysfunction is common in Dravet syndrome	Article	2018	Kim Y., Bravo E., Thirnbeck C.K., Smith-Mellecker L.A., Kim S.H., Gehlbach B.K., Laux L.C., Zhou X., Nordli D.R., Jr., Richerson G.B.	Journal of Clinical Investigation	128
20630778	Short communication milder phenotype with SCN1A truncation mutation other than SMEI	Article	2010	Yu M.-J., Shi Y.-W., Gao M.-M., Deng W.-Y., Liu X.-R., Chen L., Long Y.-S., Yi Y.-H., Liao W.-P.	Seizure	19
12083760	Significant correlation of the SCN1A mutations and severe myoclonic epilepsy in infancy	Article	2002	Ohmori I., Ouchida M., Ohtsuka Y., Oka E., Shimizu K.	Biochemical and Biophysical Research Communications	295
24656210	Sleep abnormalities in children with dravet syndrome	Article	2014	Dhamija R., Erickson M.K., St Louis E.K., Wirrell E., Kotagal S.	Pediatric Neurology	50
24665294	Sodium Channel Gene Mutations in Children with GEFS+ and Dravet Syndrome: A Cross Sectional Study	Article	2013	Iran J Child Neurol	Iran J Child Neurol	Iran J Child Neurol	TONEKABONI SH
16430863	Somatic and germline mosaicisms in Severe Myoclonic Epilepsy of Infancy	Article	2006	Gennaro E., Santorelli F.M., Bertini E., Buti D., Gaggero R., Gobbi G., Lini M., Granata T., Freri E., Parmeggiani A., Striano P., Veggiotti P., Cardinali S., Bricarelli F.D., Minetti C., Zara F.	Biochemical and Biophysical Research Communications	341
29341473	Somatic mosaic deletions involving SCN1A cause Dravet syndrome	Article	2018	Nakayama T., Ishii A., Yoshida T., Nasu H., Shimojima K., Yamamoto T., Kure S., Hirose S.	American Journal of Medical Genetics, Part A	176
27889818	Somatosensory reflex seizures in a child with epilepsy related to novel SCN1A mutation	Article	2017	Arican P., Dundar N.O., Cavusoglu D., Ozdemır T.R., Gencpinar P.	Child's Nervous System	33
18930999	Spectrum of SCN1A gene mutations associated with Dravet syndrome: Analysis of 333 patients	Article	2009	Depienne C., Trouillard O., Saint-Martin C., Gourfinkel-An I., Bouteiller D., Carpentier W., Keren B., Abert B., Gautier A., Baulac S., Arzimanoglou A., Cazeneuve C., Nabbout R., LeGuern E.	Journal of Medical Genetics	46
12821740	Spectrum of SCN1A mutations in severe myoclonic epilepsy of infancy	Article	2003	Nabbout R., Gennaro E., Dalla Bernardina B., Dulac O., Madia F., Bertini E., Capovilla G., Chiron C., Cristofori G., Elia M., Fontana E., Gaggero R., Granata T., Guerrini R., Loi M., La Selva L., Lispi M.L., Matricardi A., Romeo A., Tzolas V., Valseriati D., Veggiotti P., Vigevano F., Vallée L., Dagna Bricarelli F., Bianchi A., Zara F.	Neurology	60
33084037	Starting stiripentol in adults with Dravet syndrome? Watch for ammonia and carnitine	Article	2020	Zulfiqar Ali Q., Marques P., Selvarajah A., Tabarestani S., Sadoway T., Andrade D.M.	Epilepsia	61
29473155	Stiripentol efficacy and safety in Dravet syndrome: a 12-year observational study	Article	2018	Myers K.A., Lightfoot P., Patil S.G., Cross J.H., Scheffer I.E.	Developmental Medicine and Child Neurology	60
30900478	Stiripentol for the treatment of seizures associated with Dravet syndrome	Article	2019	Chiron C.	Expert Review of Neurotherapeutics	19
31176277	Successful treatment of intractable life-threatening seizures with perampanel in the first case of early myoclonic encephalopathy with a novel de novo SCN1A mutation	Article	2019	Ishikawa N., Tateishi Y., Tani H., Kobayashi Y., Itai T., Miyatake S., Kato M., Matsumoto N., Kobayashi M.	Seizure	71
22554283	Successful use of fenfluramine as an add-on treatment for Dravet syndrome	Article	Epilepsia	53	53	53
32167579	Successful use of fenfluramine in nonconvulsive status epilepticus of Dravet syndrome	Letter	2020	Specchio N., Pietrafusa N., Ferretti A., Trivisano M., Vigevano F.	Epilepsia	61
32532910	Successful utilisation of epidural analgesia for perioperative pain management in a child with sodium voltage-gated channel alpha subunit (SCN1A) gene mutation	Article	2020	Sobey J.H., Menser C.C., Reddy S.K., Hughes E.M.	BMJ Case Reports	13
26803335	Supraventricular Tachycardia during Status Epilepticus in Dravet Syndrome: A Link between Brain and Heart?	Article	2016	Daverio M., Ciccone O., Boniver C., De Palma L., Corrado D., Vecchi M.	Pediatric Neurology	56
29455050	Targeted gene panel and genotype-phenotype correlation in children with developmental and epileptic encephalopathy	Article	2018	Ko A., Youn S.E., Kim S.H., Lee J.S., Kim S., Choi J.R., Kim H.D., Lee S.-T., Kang H.-C.	Epilepsy Research	141
22612257	Targeted next generation sequencing as a diagnostic tool in epileptic disorders	Article	2012	Lemke J.R., Riesch E., Scheurenbrand T., Schubach M., Wilhelm C., Steiner I., Hansen J., Courage C., Gallati S., Bürki S., Strozzi S., Simonetti B.G., Grunt S., Steinlin M., Alber M., Wolff M., Klopstock T., Prott E.C., Lorenz R., Spaich C., Rona S., Lakshminarasimhan M., Kröll J., Dorn T., Krämer G., Synofzik M., Becker F., Weber Y.G., Lerche H., Böhm D., Biskup S.	Epilepsia	53
27582020	Temperature-dependent changes in neuronal dynamics in a patient with an SCN1A mutation and hyperthermia induced seizures	Article	2016	Peters C., Rosch R.E., Hughes E., Ruben P.C.	Scientific Reports	6
23163885	The clinical utility of an SCN1A genetic diagnosis in infantile-onset epilepsy	Article	2013	Brunklaus A., Dorris L., Ellis R., Reavey E., Lee E., Forbes G., Appleton R., Cross J.H., Ferrie C., Hughes I., Jollands A., King M.D., Livingston J., Lynch B., Philip S., Scheffer I.E., Williams R., Zuberi S.M.	Developmental Medicine and Child Neurology	55
31249551	The Efficacy of Ketogenic Diet in 60 Chinese Patients With Dravet Syndrome	Article	2019	Front Neurol	Front Neurol	Front Neurol	Tian X
25666511	The European patient with Dravet syndrome: Results from a parent-reported survey on antiepileptic drug use in the European population with Dravet syndrome	Article	2015	Aras L.M., Isla J., Mingorance-Le Meur A.	Epilepsy and Behavior	44
25778844	The incidence of SCN1A-related Dravet syndrome in Denmark is 1:22,000: A population-based study from 2004 to 2009	Article	2015	Bayat A., Hjalgrim H., Møller R.S.	Epilepsia	56
1	The study of sodium and potassium channel gene single-nucleotide variation significance in non-mechanical forms of epilepsy	Article	2021	Khamdiyeva O., Tileules Z., Baratzhanova G., Perfilyeva A., Djansugurova L.	Egyptian Journal of Medical Human Genetics	22
15041696	Theoretical Investigation of the Neuronal Na+ Channel SCN1A: Abnormal Gating and Epilepsy	Article	2004	Clancy C.E., Kass R.S.	Biophysical Journal	86
22140129	Thoracic myelopathy secondary to seizure following scoliosis surgery	Article	2012	Myers K.A., Payne E.T., Esser M.J., Kirton A., Howard J.J.	Journal of Child Neurology	27
20879882	Timing of de novo mutagenesis - A twin study of sodium-channel mutations	Article	2010	Vadlamudi L., Dibbens L.M., Lawrence K.M., Iona X., McMahon J.M., Murrell W., Mackay-Sim A., Scheffer I.E., Berkovic S.F.	New England Journal of Medicine	363
1	Trazodone: A New Antiepileptic Drug for Dravet Syndrome?	Article	2018	Azevedo Kauppila L., Amorim I., Bentes C., Peralta A.R.	International Journal of Epilepsy	5
21204806	Two distinct regions in 2q24.2-q24.3 associated with idiopathic epilepsy	Article	2010	Epilepsia	Epilepsia	Epilepsia	Krepischi AC
27544716	Two mild cases of Dravet syndrome with truncating mutation of SCN1A	Article	2017	Takaori T., Kumakura A., Ishii A., Hirose S., Hata D.	Brain and Development	39
20682179	Two Novel Mutations in SCN1A Gene in Iranian Patients with Epilepsy	Article	2010	Ebrahimi A., Houshmand M., Tonekaboni S.H., Fallah Mahboob Passand M.S., Zainali S., Moghadasi M.	Archives of Medical Research	41
28387369	Unexplained Early Infantile Epileptic Encephalopathy in Han Chinese Children: Next-Generation Sequencing and Phenotype Enriching	Article	2017	Arafat A., Jing P., Ma Y., Pu M., Nan G., Fang H., Chen C., Fei Y.	Scientific Reports	7
26648591	Unexplained early onset epileptic encephalopathy: Exome screening and phenotype expansion	Article	2016	Allen N.M., Conroy J., Shahwan A., Lynch B., Correa R.G., Pena S.D.J., McCreary D., Magalhães T.R., Ennis S., Lynch S.A., King M.D.	Epilepsia	57
20172746	Unusual consequences of status epilepticus in Dravet syndrome	Article	2010	Seizure	Seizure	Seizure	Chipaux M
28079431	Vagus nerve stimulation in intractable epilepsy associated with SCN1A gene abnormalities	Article	2017	Fulton S.P., Van Poppel K., McGregor A.L., Mudigoudar B., Wheless J.W.	Journal of Child Neurology	32
23398550	Variability of EEG-fMRI findings in patients with SCN1A -positive Dravet syndrome	Article	2013	Moehring J., Von Spiczak S., Moeller F., Helbig I., Wolff S., Jansen O., Muhle H., Boor R., Stephani U., Siniatchkin M.	Epilepsia	54
21204810	Variable epilepsy phenotypes associated with a familial intragenic deletion of the SCN1A gene	Article	2010	Guerrini R., Cellini E., Mei D., Metitieri T., Petrelli C., Pucatti D., Marini C., Zamponi N.	Epilepsia	51
24679980	When is a child with status epilepticus likely to have Dravet syndrome?	Article	2014	Le Gal F., Lebon S., Ramelli G.P., Datta A.N., Mercati D., Maier O., Combescure C., Rodriguez M.I., Seeck M., Roulet E., Korff C.M.	Epilepsy Research	108
22000312	When should clinicians order genetic testing for dravet syndrome?	Article	2011	Fountain-Capal J.K., Holland K.D., Gilbert D.L., Hallinan B.E.	Pediatric Neurology	45
31444242	Dravet syndrome and parkinsonism: A case report investigating the dopaminergic system	Note	2019	Deuel L., Collins A.E., Maa E.H., Barr J.P., Kern D.S.	Neurology	93
24955329	Seizure Reduction with Fluoxetine in Dravet Syndrome	Case Reports	2014	Epilepsy Behav Case Rep	Epilepsy Behav Case Rep	Epilepsy Behav Case Rep	Meador KJ
	Cryptic chromosome deletions involving SCN1A in severe myoclonic epilepsy of infancy. Does "SMEI plus" exist? [Delezioni criptiche di 2q24.3-q31.1 coinvolgenti SCN1A in pazienti con epilessia mioclonica severa dell'infanzia. Esiste la "SMEI plus"?]	Conference Paper	2008	Striano P., Madia F., Coppola A., Mancardi M.M., Gennaro E., Budetta M., Cilio M.R., Ciampa C., Errichiello L., Gaggero R., Zara F.	Bollettino - Lega Italiana contro l'Epilessia
	Dravet syndrome: Clinical features in 20 patients and genotype-phenotype correlation [Sindrome di Dravet: Aspetti clinici in 20 pazienti e correlazione genotipo-fenotipo]	Conference Paper	2006	Ragona F., Freri E., Binelli S., De Giorgi I., Madia F., Zara F., Franceschetti S., Granata T.	Bollettino - Lega Italiana contro l'Epilessia
	Evaluation of efficacy and safety of levetiracetam in patients with Dravet Syndrome [Valutazione dell'efficacia e della tollerabilità del levetiracetam in soggetti affetti da Sindrome di Dravet]	Conference Paper	2008	Cacudi M., Boni A., Giannotta M., Giovannini S., Filippini M., Guerra A., Gobbi G.	Bollettino - Lega Italiana contro l'Epilessia
12861511	Severe myoclonic epilepsy in infancy (Dravet's syndrome). Some genetic aspects [Epilepsia mioclónica grave de la infancia (síndrome de Dravet). Aspectos genéticos]	Conference Paper	2003	Herranz J.L.	Revista de Neurologia	37
	Severe Myoclonic Epilepsy in Infancy (SMEI) and/or Dravet syndrome: Longitudinal electroclinical study of 53 subjects [Epilessia Mioclonica Severa (EMS) e/o sindrome di Dravet: Studio elettroclinico longitudinale di 53 soggetti]	Conference Paper	2004	Fontana E., Dalla Bernardina B., Sgrò V., Mastella L., Filippi A., Torniero C., Giannelli F., Meneghello L., Zara F.	Bollettino - Lega Italiana contro l'Epilessia
20738378	A case of SUDEP in a patient with Dravet syndrome with SCN1A mutation	Article	2010	Le Gal F., Korff C.M., Monso-Hinard C., Mund M.T., Morris M., Malafosse A., Schmitt-Mechelke T.	Epilepsia	51
33238377	Fatal Status Epilepticus in Dravet Syndrome	Article	2020	Brain Sci	Brain Sci	Brain Sci	De Liso P
31677916	Two autopsy cases of sudden unexpected death from Dravet syndrome with novel de novo SCN1A variants	Article	2020	Hata Y., Oku Y., Taneichi H., Tanaka T., Igarashi N., Niida Y., Nishida N.	Brain and Development	42
21463280	Mortality in Dravet syndrome: Search for risk factors in Japanese patients	Article	2011	Sakauchi M., Oguni H., Kato I., Osawa M., Hirose S., Kaneko S., Takahashi Y., Takayama R., Fujiwara T.	Epilepsia	52
27810515	Mortality in Dravet syndrome	Article	2016	Cooper M.S., Mcintosh A., Crompton D.E., McMahon J.M., Schneider A., Farrell K., Ganesan V., Gill D., Kivity S., Lerman-Sagie T., McLellan A., Pelekanos J., Ramesh V., Sadleir L., Wirrell E., Scheffer I.E.	Epilepsy Research	128

## Sheet:  GEFS+(93)
19951487	[Clinical analysis and screening for SCN1A gene mutation in two pedigrees of generalized epilepsies with febrile seizures plus].	Article	2009	Wang X.H., Zhou S.Z., Guo Q., Sun D.K.	Zhonghua er ke za zhi. Chinese journal of pediatrics	47
23158734	[Phenotype and SCN1A gene mutation screening in 39 families with generalized epilepsy with febrile seizures plus].	Article	2012	Xu X.J., Zhang Y.H., Sun H.H., Liu X.Y., Wu H.S., Wu X.R.	Zhonghua er ke za zhi. Chinese journal of pediatrics	50
19054398	A case report of a family with overlapping features of autosomal dominant febrile seizures and GEFS+	Article	2009	Hindocha N., Nabbout R., Elmslie F., Makoff A., Al-Chalabi A., Nashef L.	Epilepsia	50
15715999	A family of generalized epilepsy with febrile seizures plus type 2 - A new missense mutation of SCN1A found in the pedigree of several patients with complex febrile seizures	Article	2005	Nagao Y., Mazaki-Miyazaki E., Okamura N., Takagi M., Igarashi T., Yamakawa K.	Epilepsy Research	63
15525788	A novel epilepsy mutation in the sodium channel SCN1A identifies a cytoplasmic domain for β subunit interaction	Article	（GEFS+）2004	Spampanato J., Kearney J.A., De Haan G., McEwen D.P., Escayg A., Aradi I., MacDonald B.T., Levin S.I., Soltesz I., Benna P., Montalenti E., Isom L.L., Goldin A.L., Meisler M.H.	Journal of Neuroscience	24
19339291	A novel inherited mutation in the voltage sensor region of SCN1A is associated with panayiotopoulos syndrome in siblings and generalized epilepsy with febrile seizures plus	Article	2009	Livingston J.H., Cross J.H., Mclellan A., Birch R., Zuberi S.M.	Journal of Child Neurology	24
28262406	A novel inherited SCN1A mutation associated with GEFS+ in benign and encephalopathic epilepsy	Article	2017	Gauthier A.C., Manganas L.N., Mattson R.H.	Journal of Clinical Neuroscience	40
18625863	A novel locus for generalized epilepsy with febrile seizures plus in French families	Article	2008	Baulac S., Gourfinkel-An I., Couarch P., Depienne C., Kaminska A., Dulac O., Baulac M., LeGuern E., Nabbout R.	Archives of Neurology	65
21843600	A novel SCN1A missense mutation causes generalized epilepsy with febrile seizures plus in a Chinese family	Article	2011	Cui X., Zeng F., Liu Y., Zhang J., Archacki S., Zhan T., Du R., Tang Z., Liu J., Wang Q.K., Liu M.	Neuroscience Letters	503
11254445	A novel SCN1A mutation associated with generalized epilepsy with febrile seizures plus-And prevalence of variants in patients with epilepsy	Article	2001	Escayg A., Heils A., Macdonald B.T., Haug K., Sander T., Meisler M.H.	American Journal of Human Genetics	68
15694566	A novel SCN1A mutation associated with severe GEFS+ in a large South American pedigree	Article	2005	Pineda-Trujillo N., Carrizosa J., Cornejo W., Arias W., Franco C., Cabrera D., Bedoya G., Ruíz-Linares A.	Seizure	14
15827091	A novel susceptibility locus at 2p24 for generalised epilepsy with febrile seizures plus	Article	2005	Audenaert D., Claes L., Claeys K.G., Deprez L., Van Dyck T., Goossens D., Del-Favero J., Paesschen, Van Broeckhoven C., De Jonghe P.	Journal of Medical Genetics	42
26969601	A Point Mutation in SCN1A 5′ Genomic Region Decreases the Promoter Activity and Is Associated with Mild Epilepsy and Seizure Aggravation Induced by Antiepileptic Drug	Article	2017	Gao Q.-W., Hua L.-D., Wang J., Fan C.-X., Deng W.-Y., Li B., Bian W.-J., Shao C.-X., He N., Zhou P., Liao W.-P., Shi Y.-W.	Molecular Neurobiology	54
19402159	A rescuable folding defective Nav1.1 (SCN1A) sodium channel mutant causes GEFS+: Common mechanism in Nav1.1 related epilepsies?	Article	2009	Rusconi R., Combi R., Cestèle S., Grioni D., Franceschetti S., Dalprà L., Mantegazza M.	Human Mutation	30
10486327	A second locus for familial generalized epilepsy with febrile seizures plus maps to chromosome 2q21-q33	Article	1999	Baulac S., Gourfinkel-An I., Picard F., Rosenberg-Bourgin M., Prud'homme J.-F., Baulac M., Brice A., LeGuern E.	American Journal of Human Genetics	65
19289736	A splice site variant in the sodium channel gene SCN1A confers risk of febrile seizures	Article	2009	Schlachter K., Gruber-Sedlmayr U., Stogmann E., Lausecker M., Hotzy C., Balzar J., Schuh E., Baumgartner C., Mueller J.C., Illig T., Wichmann H.E., Lichtner P., Meitinger T., Strom T.M., Zimprich A., Zimprich F.	Neurology	72
16525050	An epilepsy mutation in the sodium channel SCN1A that decreases channel excitability	Article	2006	Barela A.J., Waddy S.P., Lickfett J.G., Hunter J., Anido A., Helmers S.L., Goldin A.L., Escayg A.	Journal of Neuroscience	26
34365615	Analysis of clinical phenotype and SCN1A gene variant in a pedigree affected with genetic epilepsy with febrile seizures	Article	2021	Sun S., Li X., Song J., Li Y., Xu L., Xia B., Hua Y., Zhu L., Wang J.	Zhonghua yi xue yi chuan xue za zhi = Zhonghua yixue yichuanxue zazhi = Chinese journal of medical genetics	38
1	Analysis of the correlation between febrile seizure and hot-spot polymorphism variation in SCN1A gene in children from Chongming County, Shanghai	Article	2016	Ye G.-Y., Chen L., Dai H., Liu X.-Q.	Journal of Shanghai Jiaotong University (Medical Science)	36
29429462	Association en SCN1a rs3812718 polymorphism and generalized epilepsy with febrile seizures plus	Article	2018	Ma Q.-L., Wang B., Chen G.-F., Huang J.-L., Li Y., Cao D.-Z., Liu R.-T.	Chinese Journal of Contemporary Pediatrics	20
15605469	Autism in several members of a family with generalized epilepsy with febrile seizures plus	Case Reports	2004	J Child Neurol	J Child Neurol	J Child Neurol	Dixon-Salazar TJ
11823106	Autosomal dominant epilepsy with febrile seizures plus with missense mutations of the (Na+)-channel α1 subunit gene, SCN1A	Article	2002	Ito M., Nagafuji H., Okazawa H., Yamakawa K., Sugawara T., Mazaki-Miyazaki E., Hirose S., Fukuma G., Mitsudome A., Wada K., Kaneko S.	Epilepsy Research	48
24257433	Broad phenotypic heterogeneity due to a novel SCN1A mutation in a family with genetic epilepsy with febrile seizures plus	Article	2014	Goldberg-Stern H., Aharoni S., Afawi Z., Bennett O., Appenzeller S., Pendziwiat M., Kuhlenbäumer G., Basel-Vanagaite L., Shuper A., Korczyn A.D., Helbig I.	Journal of Child Neurology	29
12060016	Clinical and genetic analysis of a new multigenerational pedigree with GEFS+ (Generalized Epilepsy with Febrile Seizures Plus)	Article	2002	Gérard F., Pereira S., Robaglia-Schlupp A., Genton P., Szepetowski P.	Epilepsia	43
31729702	Clinical and genetic aspect of 30 tunisian families with febrile seizures	Article	2019	Feki F.K., Fendri-Kriaa N., Kolsi D., Rabai A., Fakhfakh F., Triki C.C.	Tunisie Medicale	97
19200853	Clinical and genetic familial study of a large cohort of Italian children with idiopathic epilepsy	Article	2009	Combi R., Grioni D., Contri M., Redaelli S., Redaelli F., Bassi M.T., Barisani D., Lavitrano M.L., Tredici G., Tenchini M.L., Bertolini M., Dalprà L.	Brain Research Bulletin	79
1	Clinical and molecular genetic analysis of a multigenerational pedigree with generalized epilepsy with febrile seizures plus	Article	2007	Zhou S.-Z., Song Y.-Q., Chen C., Sun D.-K.	Chinese Journal of Neurology	40
28442529	Coinheritance of novel mutations in SCN1A causing gefs+ and in KDM6A causing kabuki syndrome in a family	Article	2017	Kim J., Lee C.G.	Annals of Clinical and Laboratory Science	47
32595013	Copy number variation in genetic epilepsy with febrile seizures plus	Article	2020	Fortin O., Vincelette C., Chénier S., Ghais A., Shevell M.I., Simard-Tremblay E., Myers K.A.	European Journal of Paediatric Neurology	27
1	De novo missense mutation in SCN1A: A case report of GEFS plus with good prognosis	Article	2005	De Polo G., Liava A., Martinuzzi A., Frate E., Gennaro E.	Bollettino - Lega Italiana contro l'Epilessia
28084635	De novo SCN1A pathogenic variants in the GEFS+ spectrum: Not always a familial syndrome	Article	2017	Myers K.A., Burgess R., Afawi Z., Damiano J.A., Berkovic S.F., Hildebrand M.S., Scheffer I.E.	Epilepsia	58
32540801	De novo truncating mutation in SCN1A as a cause of febrile seizures plus (FS+)	Article	2020	Jaimes A., Guerrero-López R., González-Giráldez B., Serratosa J.M.	Epileptic Disorders	22
22944210	De-novo mutations and genetic variation in the SCN1A gene in Malaysian patients with generalized epilepsy with febrile seizures plus (GEFS+)	Article	2012	Tan E.H., Razak S.A., Abdullah J.M., Mohamed Yusoff A.A.	Epilepsy Research	102
34293681	Differences in SCN1A intronic variants result in diverse aberrant splicing patterns and are related to the phenotypes of epilepsy with febrile seizures	Article	2021	Zhou X., Xu H., Cai X., Tang B., Liu X., Shi Y., Zheng J., Liao W., Yu L.	Epilepsy Research	176
19292758	Does a SCN1A gene mutation confer earlier age of onset of febrile seizures in GEFS+?	Article	2009	Sijben A.E.J., Sithinamsuwan P., Radhakrishnan A., Badawy R.A.B., Dibbens L., Mazarib A., Lev D., Lerman-Sagie T., Straussberg R., Berkovic S.F., Scheffer I.E.	Epilepsia	50
28373025	Early-life febrile seizures worsen adult phenotypes in Scn1a mutants	Article	2017	Dutton S.B.B., Dutt K., Papale L.A., Helmers S., Goldin A.L., Escayg A.	Experimental Neurology	293
1	Epilepsy and the SCN1A gene [Epilepsie en het SCN1A-gen]	Article	2008	Dekker N., Van Kempen M.J.A., Lindhout D., Van Nieuwenhuizen O., Brilstra E.H.	Tijdschrift voor Kindergeneeskunde	76
20477842	Failure to detect association between polymorphisms of the sodium channel gene SCN1A and febrile seizures in Chinese patients with epilepsy	Article	2010	Zhang C., Wong V., Ng P.W., Lui C.H.T., Sin N.C., Wong K.S., Baum L., Kwan P.	Epilepsia	51
22578703	Failure to find association between febrile seizures and SCN1A rs3812718 polymorphism in south Indian patients with mesial temporal lobe epilepsy and hippocampal sclerosis	Article	2012	Balan S., Vellichirammal N.N., Banerjee M., Radhakrishnan K.	Epilepsy Research	101
17884755	GEFS+ where focal seizures evolve from generalized spike wave: Video-EEG study of two children	Article	2007	Yu H.D., Berkovic S.F., Scheffer I.E.	Epileptic Disorders	9
22011963	Generalised epilepsy with febrile seizures plus (GEFS +): Molecular analysis in a restricted area	Article	2012	Polizzi A., Incorpora G., Pavone P., Ruggieri M., Annesi G., Gambardella A., Pavone L., Quattrone A.	Child's Nervous System	28
1	Generalized epilepsy with febrile seizure plus (GEFS+) spectrum: Novel de novo mutation of SCN1A detected in a Malaysian patient	Article	2012	Tan E.H., Yusoff A.A.M., Abdullah J.M., Razak S.A.	Journal of Pediatric Neurosciences	7
23248692	Generalized epilepsy with febrile seizure plus (GEFS+) spectrum: Novel de novo mutation of SCN1A detected in a Malaysian patient	Article	2012	J Pediatr Neurosci	J Pediatr Neurosci	J Pediatr Neurosci	Tan EH
20452746	Generalized epilepsy with febrile seizures plus (GEFS+) spectrum: Clinical manifestations and SCN1A mutations in Indonesian patients	Article	2010	Herini E.S., Gunadi, Harahap I.S.K., Yusoff S., Morikawa S., Patria S.Y., Nishimura N., Sunartini, Sutaryo, Takada S., Matsuo M., Nishio H.	Epilepsy Research	90
12535936	Generalized epilepsy with febrile seizures plus type 2 mutation W1204R alters voltage-dependent gating of Nav1.1 sodium channels	Article	2003	Spampanato J., Escayg A., Meisler M.H., Goldin A.L.	Neuroscience	116
16053169	Generalized epilepsy with febrile seizures plus: clinical and genetic analysis of three Serbian families	Article	2005	Ristić A.J., Janković S., Annesi G., Carrideo S., Annesi F., Gambardella A., Maksimović G., Gnjatović B., Petrović I., Vojvodić N., Sokić D.	Srpski arhiv za celokupno lekarstvo	133
11591834	Generalized epilepsy with febrile seizures plus: Further heterogeneity in a large family	Article	2001	Lerche H., Weber Y.G., Baier H., Jurkat-Rott K., Kraus De Camargo O., Ludolph A.C., Bode H., Lehmann-Horn F.	Neurology	57
20117752	Generalized Epilepsy With Febrile Seizures plus: Novel SCN1A Mutation	Article	2010	Dimova P.S., Yordanova I., Bojinova V., Jordanova A., Kremenski I.	Pediatric Neurology	42
25874779	Genetic epilepsies with febrile seizures plus: clinical spectrum of Polish patients with SCN1A mutation - preliminary report	Article	2014	Terczyńska I., Szczepanik E., Duszyc K., Górka P., Tataj R., Hoffman-Zacharska D.	Developmental period medicine	18
19236456	Genetic screening of two Tunisian families with generalized epilepsy with febrile seizures plus	Article	2009	Fendri-Kriaa N., Kammoun F., Rebai A., Kolsi D., Hadj Salem I., Fakhfakh F., Triki C.	European Journal of Neurology	16
20729507	Genotype-phenotype correlations in a group of 15 SCN1A-mutated italian patients with GEFS+ spectrum (seizures plus, classical and borderline severe myoclonic epilepsy of infancy)	Article	2010	Nicita F., Spalice A., Papetti L., Ursitti F., Parisi P., Gennaro E., Zara F., Iannetti P.	Journal of Child Neurology	25
1	Identification of a Novel Nonsense Variant in the SCN1A Gene that Causes Febrile Seizure Disorder	Article	2018	Jouali F., Marchoudi N., Rouissi A., Fekkak J.	Journal of Pediatric Neurology	16
16326807	Identification of an Nav1.1 sodium channel (SCN1A) loss-of-function mutation associated with familial simple febrile seizures	Article	2005	Mantegazza M., Gambardella A., Rusconi R., Schiavon E., Annesi F., Cassulini R.R., Labate A., Carrideo S., Chifari R., Canevini M.P., Canger R., Franceschetti S., Annesi G., Wanke E., Quattrone A.	Proceedings of the National Academy of Sciences of the United States of America	102
28951233	Identification of two mutations in cis in the SCN1A gene in a family showing genetic epilepsy with febrile seizures plus (GEFS+) and idiopathic generalized epilepsy (IGE)	Article	2017	Binini N., Sancini G., Villa C., Dal Magro R., Sansoni V., Rusconi R., Mantegazza M., Grioni D., Talpo F., Toselli M., Combi R.	Brain Research	1677
17561957	Idiopathic epilepsies with seizures precipitated by fever and SCN1A abnormalities	Article	2007	Marini C., Mei D., Temudo T., Ferrari A.R., Buti D., Dravet C., Dias A.I., Moreira A., Calado E., Seri S., Neville B., Narbona J., Reid E., Michelucci R., Sicca F., Cross H.J., Guerrini R.	Epilepsia	48
19171087	Linkage location and mutation analysis of generalized epilepsy with febrile seizures plus	Article	2008	Lin H., Wang Y.-P., Wang M.-Y., Wu L.-W.	National Medical Journal of China	88
26311622	Missense mutations in sodium channel SCN1A and SCN2A predispose children to encephalopathy with severe febrile seizures	Article	2015	Saitoh M., Ishii A., Ihara Y., Hoshino A., Terashima H., Kubota M., Kikuchi K., Yamanaka G., Amemiya K., Hirose S., Mizuguchi M.	Epilepsy Research	117
12383277	Molecular genetics of febrile seizures	Conference Paper	2002	Iwasaki N., Nakayama J., Hamano K., Matsui A., Arinami T.	Epilepsia	43
1	Mosaic SCN1A mutation in a family with partial epilepsy with febrile seizures plus	Article	2008	Chen L., Shi Y.-W., Deng W.-Y., Yu M.-J., Long Y.-S., Liu X.-R., Gao M.-M., Chang H.-H., Yi Y.-H., Liao W.-P.	Chinese Journal of Neurology	41
22151702	Mosaic SCN1A mutations in familial partial epilepsy with antecedent febrile seizures	Article	2012	Shi Y.-W., Yu M.-J., Long Y.-S., Qin B., He N., Meng H., Liu X.-R., Deng W.-Y., Gao M.-M., Yi Y.-H., Li B.-M., Liao W.-P.	Genes, Brain and Behavior	11
21704126	Mutation screening of three Chinese families with genetic epilepsy with febrile seizures plus	Article	2011	Lin H., Li J., Wang M., Wang Z., Wang Y., Wu L.	Neuroscience Letters	500
33895391	Mutations in the sodium channel genes SCN1A, SCN3A, and SCN9A in children with epilepsy with febrile seizures plus(EFS+)	Article	2021	Ma H., Guo Y., Chen Z., Wang L., Tang Z., Zhang J., Miao Q., Zhai Q.	Seizure	88
10742094	Mutations of SCN1A, encoding a neuronal sodium channel, in two families with GEFS+2	Article	2000	Escayg A., MacDonald B.T., Meisler M.H., Baulac S., Huberfeld G., An-Gourfinkel I., Brice A., LeGuern E., Moulard B., Chaigne D., Buresi C., Malafosse A.	Nature Genetics	24
11524484	Nav1.1 mutations cause febrile seizures associated with afebrile partial seizures	Article	2001	Sugawara T., Mazaki-Miyazaki E., Ito M., Nagafuji H., Fukuma G., Mitsudome A., Wada K., Kaneko S., Hirose S., Yamakawa K.	Neurology	57
11254444	Neuronal sodium-channel β1-subunit mutations in generalized epilepsy with febrile seizures plus	Article	2001	Wallace R.H., Scheffer I.E., Barnett S., Richards M., Dibbens L., Desai R.R., Lerman-Sagie T., Lev D., Mazarib A., Brand N., Ben-Zeev B., Goikhman I., Singh R., Kremmidiotis G., Gardner A., Sutherland G.R., George A.L., Jr., Mulley J.C., Berkovic S.F.	American Journal of Human Genetics	68
34706024	Nodular heterotopia: a rare finding in patients with epilepsy and SCN1A mutation	Article	2021	Arq Neuropsiquiatr	Arq Neuropsiquiatr	Arq Neuropsiquiatr	Klettenberg MRP
17903680	Novel De Novo Mutation of a Conserved SCN1A Amino-Acid Residue (R1596)	Article	2007	Dlugos D.J., Ferraro T.N., Buono R.J.	Pediatric Neurology	37
18632234	Novel de novo splice-site mutation of SCN1A in a patient with partial epilepsy with febrile seizures plus	Article	2009	Kumakura A., Ito M., Hata D., Oh N., Kurahashi H., Wang J.-w., Hirose S.	Brain and Development	31
21488258	Novel human pathological mutations. Gene symbol: SCN1A. Disease: generalized epilepsy with febrile seizures plus	Article	2010	Hum Genet	Hum Genet	Hum Genet	Lin WD
11756608	Partial and generalized epilepsy with febrile seizures plus and a novel SCN1A mutation	Article	2001	Abou-Khalil B., Ge Q., Desai R., Ryther R., Bazyk A., Bailey R., Haines J.L., Sutcliffe J.S., George A.L.	Neurology	57
17507202	Patients with a sodium channel alpha 1 gene mutation show wide phenotypic variation	Article	2007	Osaka H., Ogiwara I., Mazaki E., Okamura N., Yamashita S., Iai M., Yamada M., Kurosawa K., Iwamoto H., Yasui-Furukori N., Kaneko S., Fujiwara T., Inoue Y., Yamakawa K.	Epilepsy Research	75
16884893	Phenotypes and genotypes in epilepsy with febrile seizures plus	Article	2006	Ito M., Yamakawa K., Sugawara T., Hirose S., Fukuma G., Kaneko S.	Epilepsy Research	70
21762453	Replication of association between a SCN1A splice variant and febrile seizures	Article	2011	Le Gal F., Salzmann A., Crespel A., Malafosse A.	Epilepsia	52
28192756	SCN1A clinical spectrum includes the self-limited focal epilepsies of childhood	Article	2017	Kivity S., Oliver K.L., Afawi Z., Damiano J.A., Arsov T., Bahlo M., Berkovic S.F.	Epilepsy Research	131
20875856	Scn1a missense mutation causes limbic hyperexcitability and vulnerability to experimental febrile seizures	Article	2011	Ohno Y., Ishihara S., Mashimo T., Sofue N., Shimizu S., Imaoku T., Tsurumi T., Sasa M., Serikawa T.	Neurobiology of Disease	41
33108073	SCN1A mutation spectrum in a cohort of bulgarian patients with GEFS+ phenotype	Article	2020	Peycheva V., Ivanova N., Kamenarova K., Panova M., Pacheva I., Ivanov I., Bojidarova M., Tacheva G., Stamatov D., Litvinenko I., Hristova D., Deneva D., Rodopska E., Slavkova E., Aleksandrova I., Simeonov E., Dimova P., Bojinova V., Mitev V., Jordanova A., Kaneva R.	Turkish Journal of Pediatrics	62
21868258	SCN1A mutational analysis in Korean patients with Dravet syndrome	Article	2011	Lim B.C., Hwang H., Chae J.H., Choi J.-E., Hwang Y.S., Kang S.-H., Ki C.-S., Kim K.J.	Seizure	20
30977726	SCN1A mutations in focal epilepsy with auditory features: widening the spectrum of GEFS plus	Article	2019	Bisulli F., Licchetta L., Baldassari S., Muccioli L., Marconi C., Cantalupo G., Myers C., Menghi V., Minardi R., Caporali L., Marini C., Guerrini R., Mefford H.C., Tinuper P., Pippucci T.	Epileptic Disorders	21
18566737	SCN1A, SCN1B, and GABRG2 gene mutation analysis in Chinese families with generalized epilepsy with febrile seizures plus	Article	2008	Sun H., Zhang Y., Liang J., Liu X., Ma X., Wu H., Xu K., Qin J., Qi Y., Wu X.	Journal of Human Genetics	53
34174751	SCN1A-related epilepsy with recessive inheritance: Two further families	Article	2021	Moretti R., Arnaud L., Bouteiller D., Trouillard O., Moreau P., Buratti J., Rastetter A., Keren B., Des Portes V., Toulouse J., Gourfinkel-An I., Leguern E., Depienne C., Mignot C., Nava C.	European Journal of Paediatric Neurology	33
	Screening of SCN1A gene mutation in 10 families with generalized epilepsy accompanied by febrile seizure	Article	2014	Wu G.-S., Gao F., Shen Z., Mao S.-S., Shen J., Yuan Z.-F., Li S.	Medical Journal of Chinese People's Liberation Army	39
33851920	Temporal-parietal-occipital epilepsy in GEFS+ associated with SCN1A mutation	Article	2021	Riva A., Coppola A., Balagura G., Scala M., Iacomino M., Marchese F., Amadori E., Lattanzi S., Meo R., Striano S., Salpietro V., Zara F., Minetti C., Striano P., Bilo L.	Epileptic Disorders	23
12919402	Two novel scn1a missense mutations in generalized epilepsy with febrile seizures plus	Short Survey	2003	Annesi G., Gambardella A., Carrideo S., Incorpora G., Labate A., Pasqua A.A., Civitelli D., Polizzi A., Annesi F., Spadafora P., Tarantino P., Cirò Candiano I.C., Romeo N., De Marco E.V., Ventura P., LePiane E., Zappia M., Aguglia U., Pavone L., Quattrone A.	Epilepsia	44
	Vagus nerve stimulation for genetic epilepsy with febrile seizures plus (GEFS+) accompanying seizures with impaired consciousness	Article	2017	Hanaya R., Kashida Y., Hosoyama H., Arita K., Niantiarno F.H., Maruyama S., Otsubo T., Tanaka K., Ishii A., Hirose S.	Epilepsy and Behavior Case Reports	7
21775168	Variable expressivity of a novel mutation in the SCN1A gene leading to an autosomal dominant seizure disorder	Article	2011	Mhanni A.A., Hartley J.N., Sanger W.G., Chudley A.E., Spriggs E.L.	Seizure	20
19464195	Variable neurologic phenotype in a GEFS+ family with a novel mutation in SCN1A	Article	2009	Mahoney K., Moore S.J., Buckley D., Alam M., Parfrey P., Penney S., Merner N., Hodgkinson K., Young T.-L.	Seizure	18
16359470	A case of extended spectrum GEFS+	Case Reports	2005	Grant A.C., Vazquez B.	Epilepsia	46
17927801	Genetic screening of Scandinavian families with febrile seizures and epilepsy or GEFS+	Article	2008	Selmer K.K., Egeland T., Solaas M.H., Nakken K.O., Kjeldsen M.J., Friis M.L., Brandal K., Corey L.A., Undlien D.E.	Acta Neurologica Scandinavica	117
	A four generation sardinian family with idiopathic generalized epilepsy and febrile seizures: Clinical and genetic study [Studio clinico e genetico su quattro generazioni di una famiglia sarda con epilessia generalizzata idiopatica e convulsioni febbrili]	Conference Paper	2008	Pisano T., Falchi M., Meloni M., Gaspa G., Scioni M., Chillotti I., Madeddu F., Cianchetti C., Pruna D.	Bollettino - Lega Italiana contro l'Epilessia
	Electroclinical features of a family with SCN1A loss-of-function mutation associated with simple febrile seizures [Caratteristiche elettrocliniche di una famiglia con convulsioni febbrili semplici associata a mutazione con perdita della funzione di SCN1A]	Conference Paper	2006	Colosimo E., Gambardella A., Mantegazza M., Labate A., Rusconi R., Schiavon E., Annesi F., Cassulini R.R., Carrideo S., Chifari R., Canevini M.P., Canger R., Franceschetti S., Annesi G., Wanke E., Quattrone A.	Bollettino - Lega Italiana contro l'Epilessia
20367785	Febrile seizures, genetic (generalized) epilepsy with febrile seizures plus, and Dravet's syndrome	Case Reports	2010	J Spec Pediatr Nurs	J Spec Pediatr Nurs	J Spec Pediatr Nurs	Scanlon A
18251839	Two cases of sudden unexpected death in epilepsy in a GEFS+ family with an SCN1A mutation	Letter	2008	Hindocha N., Nashef L., Elmslie F., Birch R., Zuberi S., Al-Chalabi A., Crotti L., Schwartz P.J., Makoff A.	Epilepsia	49
30660056	Sudden unexpected death in GEFS+ families with sodium channel pathogenic variants	Article	2019	Myers K.A., Shevell M.I., Sébire G.	Epilepsy Research	150

## Sheet: EMAS Doose(3)
30660939	Genetic testing in a cohort of patients with potential epilepsy with myoclonic-atonic seizures	Article	2019	Angione K., Eschbach K., Smith G., Joshi C., Demarest S.	Epilepsy Research	150
21396429	One novel Dravet syndrome causing mutation and one recurrent MAE causing mutation in SCN1A gene	Article	2011	Yordanova I., Todorov T., Dimova P., Hristova D., Tincheva R., Litvinenko I., Yotovska O., Kremensky I., Todorova A.	Neuroscience Letters	494
32913952	Clinical and genetic characteristics of patients with Doose syndrome	Article	2020	Epilepsia Open	Epilepsia Open	Epilepsia Open	Hinokuma N

## Sheet: MPSI or EIMFS(9)
21753172	De novo SCN1A mutations in migrating partial seizures of infancy	Article	2011	Neurology	Neurology	Neurology	Carranza Rojo D
25524840	Epilepsy phenotype associated with a chromosome 2q24.3 deletion involving SCN1A: Migrating partial seizures of infancy or atypical dravet syndrome?	Article	2015	Lim B.C., Hwang H., Kim H., Chae J.-H., Choi J., Kim K.J., Hwang Y.S., Yum M.-S., Ko T.-S.	Epilepsy Research	109
21555645	Novel SCN1A mutation in a proband with malignant migrating partial seizures of infancy	Article	2011	Freilich E.R., Jones J.M., Gaillard W.D., Conry J.A., Tsuchida T.N., Reyes C., Dib-Hajj S., Waxman S.G., Meisler M.H., Pearl P.L.	Archives of Neurology	68
23667778	Therapeutic hypothermia for refractory status epilepticus in a child with malignant migrating partial seizures of infancy and SCN1A mutation: a case report	Article	2012	Ther Hypothermia Temp Manag	Ther Hypothermia Temp Manag	Ther Hypothermia Temp Manag	Shein SL
34020146	Clinical and genetic characteristics of epilepsy of infancy with migrating focal seizures in Chinese children	Article	2021	Fang Z.-X., Xie L.-L., Yan L.-S., Lin H., Pan Y.-N., Liu B.-K., Jiang Y., Cheng M., Li X.-J., Jiang L.	Epilepsy Research	174
27784474	Clinical features and gene mutations in epilepsy of infancy with migrating focal seizures	Article	2016	Shang K.W., Zhang Y.H., Yang X.L., Liu A.J., Yang Z.X., Liu X.Y., Jiang Y.W., Wu X.R.	Zhonghua er ke za zhi = Chinese journal of pediatrics	54
26544041	Gene mutation analysis in 253 Chinese children with unexplained epilepsy and intellectual/developmental disabilities	Article	2015	Zhang Y., Kong W., Gao Y., Liu X., Gao K., Xie H., Wu Y., Zhang Y., Wang J., Gao F., Wu X., Jiang Y.	PLoS ONE	10
27734276	Targeted next generation sequencing: the diagnostic value in early-onset epileptic encephalopathy	Article	2017	Gokben S., Onay H., Yilmaz S., Atik T., Serdaroglu G., Tekin H., Ozkinay F.	Acta Neurologica Belgica	117
23599387	Migrating partial seizures of infancy: expansion of the electroclinical, radiological and pathological disease spectrum	Article（排除）	2013	Brain	Brain	Brain	McTague A

## Sheet: West syndrom IS(6)
31791873	Genotype-phenotype correlation on 45 individuals with West syndrome	Article	2020	Krey I., Krois-Neudenberger J., Hentschel J., Syrbe S., Polster T., Hanker B., Fiedler B., Kurlemann G., Lemke J.R.	European Journal of Paediatric Neurology	25
14504318	Sodium channel α1-subunit mutations in severe myoclonic epilepsy of infancy and infantile spasms	Article	2003	Wallace R.H., Hodgson B.L., Grinton B.E., Gardiner R.M., Robinson R., Rodriguez-Casero V., Sadleir L., Morgan J., Harkin L.A., Dibbens L.M., Yamamoto T., Andermann E., Mulley J.C., Berkovic S.F., Scheffer I.E.	Neurology	61
30113154	[A case of West syndrome with a deletion at chromosome 2q24.3-q31.3]	Case Reports	2017	No To Hattatsu	No To Hattatsu	No To Hattatsu	Hattori Y
25268096	Association of SCN1A gene polymorphisms with infantile spasms and adrenocorticotropic hormone responsiveness	Article	2014	Zhang Y., Zou L.-P., Ding Y.-X., He B., Yang G.	European Review for Medical and Pharmacological Sciences	18
32139178	Targeted gene panel sequencing in early infantile onset developmental and epileptic encephalopathy	Article	2020	Na J.-H., Shin S., Yang D., Kim B., Kim H.D., Kim S., Lee J.-S., Choi J.-R., Lee S.-T., Kang H.-C.	Brain and Development	42
25843248	Three patients manifesting early infantile epileptic spasms associated with 2q24.3 microduplications	Article（排除）	2015	Yoshitomi S., Takahashi Y., Ishizuka M., Yamaguchi T., Watanabe A., Nasu H., Ueda Y., Ohtani H., Ikeda H., Imai K., Shigematsu H., Inoue Y., Tanahashi Y., Aiba K., Ohta H., Shimada S., Yamamoto T.	Brain and Development	37

## Sheet: LGS（2）
17347258	The spectrum of SCN1A-related infantile epileptic encephalopathies	Article	2007	Harkin L.A., McMahon J.M., Iona X., Dibbens L., Pelekanos J.T., Zuberi S.M., Sadleir L.G., Andermann E., Gill D., Farrell K., Connolly M., Stanley T., Harbord M., Andermann F., Wang J., Batish S.D., Jones J.G., Seltzer W.K., Gardner A., Sutherland G., Berkovic S.F., Mulley J.C., Scheffer I.E., Abbott K., Andrews I., Appleton B., Bleasel A., Buchanan N., Burke C., Bye A., Camfield C., Camfield P.,…	Brain	130
19782004	SCN1A mutation screening in adult patients with Lennox-Gastaut syndrome features	Article	2009	Selmer K.K., Lund C., Brandal K., Undlien D.E., Brodtkorb E.	Epilepsy and Behavior	16

## Sheet: RS(1)
30305042	De novo mutations in SCN1A are associated with classic Rett syndrome: A case report	Article	2018	Henriksen M.W., Ravn K., Paus B., Von Tetzchner S., Skjeldal O.H.	BMC Medical Genetics	19

## Sheet: NEE(7)
26482601	High prevalence of genetic alterations in early-onset epileptic encephalopathies associated with infantile movement disorders	Article	2016	Kobayashi Y., Tohyama J., Kato M., Akasaka N., Magara S., Kawashima H., Ohashi T., Shiraishi H., Nakashima M., Saitsu H., Matsumoto N.	Brain and Development	38
28794249	Not all SCN1A epileptic encephalopathies are Dravet syndrome	2017	Sadleir L.G., Mountier E.I., Gill D., Davis S., Joshi C., Devile C., Kurian M.A., Mandelstam S., Wirrell E., Nickels K.C., Murali H.R., Carvill G., Myers C.T., Mefford H.C., Scheffer I.E.	Neurology	89	10
25818041	Diagnostic yield of genetic testing in epileptic encephalopathy in childhood	Article	2015	Mercimek-Mahmutoglu S., Patel J., Cordeiro D., Hewson S., Callen D., Donner E.J., Hahn C.D., Kannu P., Kobayashi J., Minassian B.A., Moharir M., Siriwardena K., Weiss S.K., Weksberg R., Snead O.C.	Epilepsia	56
25951140	Analysis of mutations in 7 genes associated with neuronal excitability and synaptic transmission in a cohort of children with non-syndromic infantile epileptic encephalopathy	Article	2015	Kwong A.K.-Y., Ho A.C.-C., Fung C.-W., Wong V.C.-N.	PLoS ONE	10
30612077	Early infantile SCN1A epileptic encephalopathy: Expanding the genotype-phenotype correlations	Article	2019	Spagnoli C., Frattini D., Rizzi S., Salerno G.G., Fusco C.	Seizure	65
24776920	Infantile epileptic encephalopathy with a hyperkinetic movement disorder and hand stereotypies associated with a novel SCN1A mutation	Note	2014	Ohashi T., Akasaka N., Kobayashi Y., Magara S., Kawashima H., Matsumoto N., Saitsu H., Tohyama J.	Epileptic Disorders	16
22309220	Mutations of the SCN1A gene in acute encephalopathy	Article	2012	Saitoh M., Shinohara M., Hoshino H., Kubota M., Amemiya K., Takanashi J.-L., Hwang S.-K., Hirose S., Mizuguchi M.	Epilepsia	53

## Sheet: Migraine(19)
16054936	Mutation in the neuronal voltage-gated sodium channel SCN1A in familial hemiplegic migraine	Article	2005	Dichgans M., Freilinger T., Eckstein G., Babini E., Lorenz-Depiereux B., Biskup S., Ferrari M.D., Herzog J., Van Den Maagdenberg A.M.J.M., Pusch M., Strom T.M.	Lancet	366
30498473	Familial Hemiplegic Migraine Type 3 (FHM3) With an SCN1A Mutation in a Chinese Family: A Case Report	Case Reports	2018	Front Neurol	Front Neurol	Front Neurol	Shao N
1	Analysis of genetic variants in SCN1A, SCN2A, KCNK18, TRPA1 and STX1A as a possible marker of migraine	Article	2020	Kowalska M., Prendecki M., Kapelusiak-Pielok M., Grzelak T., Łagan-Jędrzejczyk U., Wiszniewska M., Kozubski W., Dorszewska J.	Current Genomics	21
27919014	A novel SCN1A mutation identified in a Chinese family with familial hemiplegic migraine: A case report	Article	2017	Zhang Y., Chen N., Zhou M., Guo J., Guo J., He L.	Cephalalgia	37
18021921	Novel Mutation Confirms Seizure Locus SCN1A is Also Familial Hemiplegic Migraine Locus FHM3	Article（排除）	2007	Gargus J.J., Tournay A.	Pediatric Neurology	37
17397047	The novel p.L1649Q mutation in the SCN1A epilepsy gene is associated with familial hemiplegic migraine: genetic and functional studies. Mutation in brief #957. Online.	Article	2007	Vanmolkot K.R., Babini E., de Vries B., Stam A.H., Freilinger T., Terwindt G.M., Norris L., Haan J., Frants R.R., Ramadan N.M., Ferrari M.D., Pusch M., van den Maagdenberg A.M., Dichgans M.	Human mutation	28
19332696	Elicited repetitive daily blindness: A new phenotype associated with hemiplegic migraine and SCN1A mutations	Article	2009	Vahedi K., Depienne C., Le Fort D., Riant F., Chaine P., Trouillard O., Gaudric A., Morris M.A., LeGuern E., Tournier-Lasserve E., Bousser M.-G.	Neurology	72
19220312	First mutation in the voltage-gated NaV1.1 subunit gene SCN1A with co-occurring familial hemiplegic migraine and epilepsy	Article	2009	Castro M.-J., Stam A.H., Lemos C., De Vries B., Vanmolkot K.R.J., Barros J., Terwindt G.M., Frants R.R., Sequeiros J., Ferrari M.D., Pereira-Monteiro J.M., Van Den Maagdenberg A.M.J.M.	Cephalalgia	29
22550089	SCN1A mutation associated with intractable myoclonic epilepsy and migraine headache	Article	2013	Frosk P., Mhanni A.A., Rafay M.F.	Journal of Child Neurology	28
24646837	Familial hemiplegic migraine due to L263V SCN1A mutation: Discordance for epilepsy between two kindreds from Douro Valley	Article	2014	Barros J., Ferreira A., Brandão A.F., Lemos C., Correia F., Damásio J., Tuna A., Sequeiros J., Coutinho P., Alonso I., Pereira-Monteiro J.	Cephalalgia	34
29145747	Two novel families with hemiplegic migraine caused by recurrent SCN1A mutation p.F1499L	Article	2018	Schubert V., Auffenberg E., Biskup S., Jurkat-Rott K., Freilinger T.	Cephalalgia	38
29343472	Clinical spectrum of hemiplegic migraine and chances of finding a pathogenic mutation	Article	2018	Pelzer N., Haan J., Stam A.H., Vijfhuizen L.S., Koelewijn S.C., Smagge A., De Vries B., Ferrari M.D., Van Den Maagdenberg A.M.J.M., Terwindt G.M.	Neurology	90
26763045	Early-onset familial hemiplegic migraine due to a novel SCN1A mutation	Article	2016	Fan C., Wolking S., Lehmann-Horn F., Hedrich U.B.S., Freilinger T., Lerche H., Borck G., Kubisch C., Jurkat-Rott K.	Cephalalgia	36
26747084	Genetic studies of Polish migraine patients: Screening for causative mutations in four migraine-associated genes	Article	2016	Domitrz I., Kosiorek M., Zekanowski C., Kaminska A.	Human Genomics	10
24707016	Two novel SCN1A mutations identified in families with familial hemiplegic migraine	Article	2014	Weller C.M., Pelzer N., De Vries B., López M.A., De Fàbregues O., Pascual J., Arroyo M.A.R., Koelewijn S.C., Stam A.H., Haan J., Ferrari M.D., Terwindt G.M., Van Den Maagdenberg A.M.J.M.	Cephalalgia	34
1	Testing Genes Implicated in the Novel Case of Familial Hemiplegic Migraine	Article	2017	Khaiboullina S.F., Mendelevich E.G., Martynova E.V., Davidyuk Y.N., Giniatullin R.A., Rizvanov A.A.	BioNanoScience	7
27155821	Clinical and electroencephalographic abnormalities during the full duration of a sporadic hemiplegic migraine attack（SHM）	Article	2016	Chastan N., Lebas A., Legoff F., Parain D., Guyant-Marechal L.	Neurophysiologie Clinique	46
1	Sporadic hemiplegic migraine with scn1a gene mutation—a case report（SHM）	Article	2018	Dube M., Lakhotia A.N., Yadav V., Jain R.	European Neurological Review	14
18056581	Systematic analysis of three FHM genes in 39 sporadic patients with hemiplegic migraine（SHM）	Article	2007	De Vries B., Freilinger T., Vanmolkot K.R.J., Koenderink J.B., Stam A.H., Terwindt G.M., Babini E., Van Den Boogerd E.H., Van Den Heuvel J.J.M.W., Frants R.R., Haan J., Pusch M., Van Den Maagdenberg A.M.J.M., Ferrari M.D., Dichgans M.	Neurology	69

## Sheet: ASD(6)
32722525	Next generation sequencing of 134 children with autism spectrum disorder and regression	Article	2020	Yin J., Chun C.-A., Zavadenko N.N., Pechatnikova N.L., Naumova O.Y., Doddapaneni H.V., Hu J., Muzny D.M., Schaaf C.P., Grigorenko E.L.	Genes	11
12610651	Sodium channels SCN1A, SCN2A and SCN3A in familial autism	Article	2003	Weiss L.A., Escayg A., Kearney J.A., Trudeau M., MacDonald B.T., Mori M., Reichert J., Buxbaum J.D., Meisler M.H.	Molecular Psychiatry	8
26845707	Comprehensive molecular testing in patients with high functioning autism spectrum disorder	Article	Mutation Research - Fundamental and Molecular Mechanisms of Mutagenesis	784-785	784-785	784-785
21572417	Exome sequencing in sporadic autism spectrum disorders identifies severe de novo mutations	Article	2011	O'Roak B.J., Deriziotis P., Lee C., Vives L., Schwartz J.J., Girirajan S., Karakoc E., MacKenzie A.P., Ng S.B., Baker C., Rieder M.J., Nickerson D.A., Bernier R., Fisher S.E., Shendure J., Eichler E.E.	Nature Genetics	43
24066114	Performance Comparison of Bench-Top Next Generation Sequencers Using Microdroplet PCR-Based Enrichment for Targeted Sequencing in Patients with Autism Spectrum Disorder	Article	PLoS ONE	8	8	8
26637798	Targeted DNA Sequencing from Autism Spectrum Disorder Brains Implicates Multiple Genetic Mechanisms	Article	2015	D'Gama A.M., Pochareddy S., Li M., Jamuar S.S., Reiff R.E., Lam A.-T.N., Sestan N., Walsh C.A.	Neuron	88

[truncated: 2 more sheets: Death（2）, AMC(2)]
