# Supplementary material for: SCN1A Mutation—Beyond Dravet Syndrome: A Systematic Review and Narrative Synthesis
Source: Front Neurol. 2021 Dec 24;12:743726. doi: 10.3389/fneur.2021.743726 (PMC8739186; doi:10.3389/fneur.2021.743726)
Supplement: Supplementary file 1 [file Data_Sheet_1.ZIP › ╬─╧╫╝∞╦≈/Pubmed(1389 ).csv]

15508261	"Severe myoclonic epilepsy in infancy". Relevance for the clinician of severe epilepsy starting in infancy	Ceulemans B, Cras P.		Ceulemans B	Acta Neurol Belg	2004
30176532	[(18)F]fluorodeoxyglucose-positron emission tomography study of genetically confirmed patients with Dravet syndrome	Haginoya K, Togashi N, Kaneta T, Hino-Fukuyo N, Ishitobi M, Kakisaka Y, Uematsu M, Inui T, Okubo Y, Sato R, Miyabayashi T, Arai A, Ogiwara I, Mazaki E, Yamakawa K, Iinuma K, Kure S.		Haginoya K	Epilepsy Res	2018			10.1016/j.eplepsyres.2018.08.008
30011152	[A case of Dravet syndrome complicated by human herpesvirus-6 infection-associated acute encephalopathy and choreoathetosis]	Nakamura Y, Matsumoto H, Zaha K.		Nakamura Y	No To Hattatsu	2017
30113154	[A case of West syndrome with a deletion at chromosome 2q24.3-q31.3]	Hattori Y, Kawawaki H, Horino A, Thuji H, Nukui M, Kuki I, Okazaki S, Tomiwa K.		Hattori Y	No To Hattatsu	2017
16038283	[Advances in the studies on the molecular and genetic aspects of epilepsy]	Wang X, Wang T, Yuan MX, Liu MG, Wang Q.		Wang X	Zhongguo Yi Xue Ke Xue Yuan Xue Bao	2005
34365615	[Analysis of clinical phenotype and SCN1A gene variant in a pedigree affected with genetic epilepsy with febrile seizures]	Sun S, Li X, Song J, Li Y, Xu L, Xia B, Hua Y, Zhu L, Wang J.		Sun S	Zhonghua Yi Xue Yi Chuan Xue Za Zhi	2021			10.3760/cma.j.cn511374-20200820-00614
26252084	[Analysis of parental origin of de novo SCN1A mutations in Dravet syndrome]	Sun H, Zhang Y, Xu X, Liu X, Wu X.		Sun H	Zhonghua Yi Xue Yi Chuan Xue Za Zhi	2015			10.3760/cma.j.issn.1003-9406.2015.04.001
29188601	[Analysis of SCN1A deletions or duplications in patients with Dravet syndrome]	Zeng Q, Zhang Y, Yang X, Xu X, Zhang J, Tian X, Liu A, Liu X, Jiang Y, Wu X.		Zeng Q	Zhonghua Yi Xue Yi Chuan Xue Za Zhi	2017			10.3760/cma.j.issn.1003-9406.2017.06.001
33565071	[Analysis of SCN1A gene variants among patients with Dravet syndrome]	Li L, Zhu D.		Li L	Zhonghua Yi Xue Yi Chuan Xue Za Zhi	2021			10.3760/cma.j.cn511374-20200120-00041
29429462	[Association between SCN1A rs3812718 polymorphism and generalized epilepsy with febrile seizures plus]	Ma QL, Wang B, Chen GF, Huang JL, Li Y, Cao DZ, Liu RT.		Ma QL	Zhongguo Dang Dai Er Ke Za Zhi	2018	PMC7389242		10.7499/j.issn.1008-8830.2018.02.010
30835363	[Association of single nucleotide polymorphisms of SCN1A gene with therapeutic effect of carbamazepine among ethnic Zhuang Chinese patients with epilepsy]	Huang J, Qian Z, Chen H, Huang Q, Huang L, Liu G, Tang X.		Huang J	Zhonghua Yi Xue Yi Chuan Xue Za Zhi	2019			10.3760/cma.j.issn.1003-9406.2019.03.020
20037572	[Association study of the SCN1 gene polymorphism and effective dose of lamotrigine]	Krikova EV, Val'dman EA, Avakian GN, Andreev IaA, Denisov EV, Rider FK, Biktimerov RR, Chukanova AS, Burd SG.		Krikova EV	Zh Nevrol Psikhiatr Im S S Korsakova	2009
18302128	[Autism, epilepsy and genetics]	Mu?oz-Yunta JA, Palau-Baduell M, Salvad¨®-Salvad¨® B, Valls-Santasusana A, Rosendo-Moreno N, Clofent-Torrent¨® M, Manchado F.		Mu?oz-Yunta JA	Rev Neurol	2008
24291842	[Central Institute for the Molecular Pathomechanisms of Epilepsies]	Hirose S.		Hirose S	Rinsho Shinkeigaku	2013			10.5692/clinicalneurol.53.946
19951487	[Clinical analysis and screening for SCN1A gene mutation in two pedigrees of generalized epilepsies with febrile seizures plus]	Wang XH, Zhou SZ, Guo Q, Sun DK.		Wang XH	Zhonghua Er Ke Za Zhi	2009
19070316	[Clinical and genetic diagnosis of Dravet syndrome: report of 20 cases]	Siegler Z, Neuwirth M, Hegyi M, Paraicz E, P¨¢lmafy B, Tegzes A, Barsi P, Karcagi V, Claes L, De Jonghe P, Herczegfalvi A, Fogarasi A.		Siegler Z	Ideggyogy Sz	2008
28441824	[Clinical and neuroimaging features of acute encephalopathy after status epilepticus in Dravet syndrome]	Tian XJ, Zhang YH, Liu AJ, Yang XL, Zeng Q, Yang ZX, Ye JT, Liu XY, Jiang YW, Wu XR.		Tian XJ	Zhonghua Er Ke Za Zhi	2017			10.3760/cma.j.issn.0578-1310.2017.04.009
27784474	[Clinical features and gene mutations in epilepsy of infancy with migrating focal seizures]	Shang KW, Zhang YH, Yang XL, Liu AJ, Yang ZX, Liu XY, Jiang YW, Wu XR.		Shang KW	Zhonghua Er Ke Za Zhi	2016			10.3760/cma.j.issn.0578-1310.2016.10.005
19099883	[Clinical features and SCN1A gene mutation analysis of severe myoclonic epilepsy of infancy]	Zhang YH, Sun HH, Liu XY, Ma XW, Yang ZX, Xiong H, Qin J, Lin Q, Wu XR.		Zhang YH	Zhonghua Er Ke Za Zhi	2008
25697436	[Complex febrile Seizures or Dravet syndrome?: Description of 3 case reports]	Hern¨¢ndez M, Pedraza M, Mesa T, Troncoso M.		Hern¨¢ndez M	Rev Chil Pediatr	2014			10.4067/S0370-41062014000500010
26614543	[De novo SCN1A gene deletion in therapy-resistant Dravet syndrome]	Bene J, Hadzsiev K, Koml¨®si K, K?vesdi E, M¨¢ty¨¢s P, Melegh B.		Bene J	Orv Hetil	2015			10.1556/650.2015.30308
25342058	[Dravet syndrome and mitochondrial disease, are they comorbid pathologies?]	Cantarin-Extremera V, Ruiz-Falco Rojas ML, Garcia-Fernandez M, Duat-Rodriguez A, Lopez-Marin L, Calleja-Gero ML.		Cantarin-Extremera V	Rev Neurol	2014
22240828	[Dravet syndrome as a cause of epilepsy and learning disability]	Lund C, Bremer A, Lossius MI, Selmer KK, Brodtkorb E, Nakken KO.		Lund C	Tidsskr Nor Laegeforen	2012			10.4045/tidsskr.11.0539
21563120	[Early diagnosis of Dravet's syndrome: contributions from clinical practice and molecular biology]	Sanchez-Carpintero R.		Sanchez-Carpintero R	Rev Neurol	2011
18357670	[Epilepsy in Israel--2008]	Shuper A.		Shuper A	Harefuah	2008
20487708	[Epilepsy onset between one month and three months of life: our 11 years experience]	P¨¦rez Delgado R, Lafuente Hidalgo M, L¨®pez Pis¨®n J, Sebasti¨¢n Torres B, Torres Claveras S, Garc¨ªa Jim¨¦nez MC, Baldellou V¨¢zquez A, Pe?a Segura JL.		P¨¦rez Delgado R	Neurologia	2010
33728858	[Experience in the management of patients with genetic epilepsies and epileptic encephalopathies in the outpatient practice]	Rakhmanina OA, Volkov IV, Shestakova OI, Tomenko TR, Paniukova IV, Volkova OK, Belyaev OV, Omelchenko NN, Lebedev IA.		Rakhmanina OA	Zh Nevrol Psikhiatr Im S S Korsakova	2021			10.17116/jnevro202112102199
17259145	[Expression and function of voltage-gated Na+ channel isoforms in rat sinoatrial node]	Huang X, Ma AQ, Yang P, Du Y, Xi YT, Geng T.		Huang X	Nan Fang Yi Ke Da Xue Xue Bao	2007
16053169	[Generalized epilepsy with febrile seizures plus: clinical and genetic analysis of three Serbian families]	Risti? AJ, Jankovi? S, Annesi G, Carrideo S, Annesi F, Gambardella A, Maksimovi? G, Gnjatovi? B, Petrovi? I, Vojvodi? N, Soki? D.		Risti? AJ	Srp Arh Celok Lek	2005			10.2298/sarh0502007r
23225037	[Genetic and phenotypic characteristics of SCN1A mutations in Dravet syndrome]	Xu XJ, Zhang YH, Sun HH, Liu XY, Jiang YW, Wu XR.		Xu XJ	Zhonghua Yi Xue Yi Chuan Xue Za Zhi	2012			10.3760/cma.j.issn.1003-9406.2012.06.001
33902251	[Genetics Analysis of patients with Dravet syndrome due to mosaicism variation of paternal SCN1A gene]	Huo MZ, Niu WB, Xu JW, Shi H, Liu YD, Zhang YL.		Huo MZ	Zhonghua Yi Xue Za Zhi	2021			10.3760/cma.j.cn112137-20201225-03468
28005050	[Genetics and treatment of early infantile epileptic encephalopathies]	Sharkov AA, Sharkova IV, Belousova ED, Dadali EL.		Sharkov AA	Zh Nevrol Psikhiatr Im S S Korsakova	2016			10.17116/jnevro20161169267-73
19859879	[Genetics components in patients with temporal lobe epilepsy]	Herrera-Peco I, Fern¨¢ndez-Millares V, Pastor J, Hernando-Requejo V, Sola RG, Alonso-Cerezo C.		Herrera-Peco I	Rev Neurol	2009
12829363	[Genetics of epilepsy: new discoveries]	Chabrier S.		Chabrier S	Arch Pediatr	2003
16915377	[Genetics of migraine]	Freilinger T, Dichgans M.		Freilinger T	Nervenarzt	2006			10.1007/s00115-006-2134-7
23618705	[Genetics of migraine]	Ducros A.		Ducros A	Rev Neurol (Paris)	2013			10.1016/j.neurol.2012.11.010
27143072	[Genotype and phenotype of female Dravet syndrome with PCDH19 mutations]	Liu AJ, Zhang YH, Xu XJ, Yang XL, Yang ZX, Wu Y, Liu XY, Jiang YW, Wu XR.		Liu AJ	Zhonghua Er Ke Za Zhi	2016			10.3760/cma.j.issn.0578-1310.2016.05.004
12483879	[Infantile-onset refractory grand mal epilepsy with variable seizures]	Imai K, Inui K.		Imai K	Ryoikibetsu Shokogun Shirizu	2002
19171087	[Linkage location and mutation analysis of generalized epilepsy with febrile seizures plus]	Lin H, Wang YP, Wang MY, Wu LW.		Lin H	Zhonghua Yi Xue Za Zhi	2008
15984191	[Molecular genetic aspects of epilepsy]	Fattakhova AKh, Karunas AS, Khusnutdinova EK.		Fattakhova AKh	Zh Nevrol Psikhiatr Im S S Korsakova	2005
15651314	[Molecular genetics of epilepsy]	Yamakawa K.		Yamakawa K	Rinsho Shinkeigaku	2004
21921541	[Molecular genetics of migraine applying DNA microarray-based comprehensive resequencing and high throughput linkage analysis system]	Takahashi Y, Iizuka T, Tsuji S.		Takahashi Y	Rinsho Shinkeigaku	2010			10.5692/clinicalneurol.50.995
19350499	[Mutation analysis of the SCN1A gene in severe myoclonic epilepsy of infancy]	Sun H, Zhang Y, Liu X, Ma X, Wu H, Xu K, Qin J, Qi Y, Wu X.		Sun H	Zhonghua Yi Xue Yi Chuan Xue Za Zhi	2009			10.3760/cma.j.issn.1003-9406.2009.02.001
12235543	[Myoclonic-astatic epilepsy in early childhood: review of clinical signs, EEG features, etiology, and therapy]	Weber P, Tillmann B, Minet JC, Blauenstein U.		Weber P	Klin Padiatr	2002			10.1055/s-2002-33978
17515128	[Na channel gene mutations and epilepsy mouse model]	Yamakawa K.		Yamakawa K	No To Hattatsu	2007
25710692	[Neuronal communication and synaptic metabolism in childhood epilepsy]	Garc¨ªa-Cazorla ¨¤, Cort¨¨s-Saladelafont E, Duarte S.		Garc¨ªa-Cazorla ¨¤	Rev Neurol	2015
28690234	[PCDH19 gene mutations lead to epilepsy with mental retardation limited to females in 2 cases and literature review]	Yang L, Arafat A, Peng J, Chen C, Ma Y, Yin F.		Yang L	Zhong Nan Da Xue Xue Bao Yi Xue Ban	2017			10.11817/j.issn.1672-7347.2017.06.021
23786015	[Pharmacogenetic criteria of drug-resistant epilepsy]	Oros MM.		Oros MM	Lik Sprava	2012
20648993	[Pharmacoresistant epilepsy - epidemiology and current studies]	Pierzchala K.		Pierzchala K	Neurol Neurochir Pol	2010			10.1016/s0028-3843(14)60043-8
23158734	[Phenotype and SCN1A gene mutation screening in 39 families with generalized epilepsy with febrile seizures plus]	Xu XJ, Zhang YH, Sun HH, Liu XY, Wu HS, Wu XR.		Xu XJ	Zhonghua Er Ke Za Zhi	2012
19099699	[Progress in molecular genetics in severe myoclonic epilepsy of infancy]	Sun HH, Zhang YH.		Sun HH	Zhonghua Er Ke Za Zhi	2008
12476426	[Progress in molecular genetics of epilepsy]	Tang B, Zhang Y.		Tang B	Zhonghua Yi Xue Yi Chuan Xue Za Zhi	2002
18458705	[Progress in molecular genetics of generalized epilepsy with febrile seizures plus]	Sun HH, Zhang YH.		Sun HH	Beijing Da Xue Xue Bao Yi Xue Ban	2008
12861511	[Severe myoclonic epilepsy in infancy (Dravet's syndrome). Some genetic aspects]	Herranz JL.		Herranz JL	Rev Neurol	2003
12861510	[Severe myoclonic epilepsy in infancy. Clinical and paraclinical aspects]	Mart¨ªnez-Bermejo A, L¨®pez-Mart¨ªn V, Arcas J, Tendero A, Roche Herrero MC, Merino M.		Mart¨ªnez-Bermejo A	Rev Neurol	2003
12483862	[Severe myoclonic epilepsy in infancy]	Miura H.		Miura H	Ryoikibetsu Shokogun Shirizu	2002
12483878	[Severe myoclonic epilepsy in infancy]	Inui K, Imai K.		Inui K	Ryoikibetsu Shokogun Shirizu	2002
19099891	[Sodium channel alpha-1-subunit gene mutations and epilepsy]	Wang JW, Ge LJ, Sun RP.		Wang JW	Zhonghua Er Ke Za Zhi	2008
25219203	[Src family kinases affect the expression of Nav1.1 in spiral ganglion neurons]	Zeng Q, Chen H, Su J.		Zeng Q	Lin Chung Er Bi Yan Hou Tou Jing Wai Ke Za Zhi	2014
29141311	[Study on mosaicism of SCN1A gene mutation in parents of children with Dravet syndrome]	Liu AJ, Yang XX, Xu XJ, Wu QX, Tian XJ, Yang XL, Wu XR, Wei LP, Zhang YH.		Liu AJ	Zhonghua Er Ke Za Zhi	2017			10.3760/cma.j.issn.0578-1310.2017.11.005
28005047	[The diagnosis of idiopathic epilepsy in children based on the algorithm of molecular-genetic studies]	Kozhanova TV, Zhylina SS, Aivazian SO, Ananyeva TV, Abramov AA, Belenikin MS, Meshcheryakova TI, Mutovin GR, Zavadenko NN.		Kozhanova TV	Zh Nevrol Psikhiatr Im S S Korsakova	2016			10.17116/jnevro20161169249-56
33902223	[The etiology of 340 infants with early-onset epilepsy]	Song TY, Deng J, Fang F, Chen CH, Wang XH, Wang X, Zhuo XW, Dai LF, Wang HM, Tian XJ.		Song TY	Zhonghua Er Ke Za Zhi	2021			10.3760/cma.j.cn112140-20201016-00947
23035603	[The new algorithm for disease management of patients with epilepsy based on genetic research]	Oros MM, Smolanka VI.		Oros MM	Lik Sprava	2012
17659861	[Vaccine encephalopathy: a myth collapses?]	Kahane P, Arzimanoglou A.		Kahane P	Presse Med	2007			10.1016/j.lpm.2007.05.025
32394465	A 5-HT(1D) -receptor agonist protects Dravet syndrome mice from seizure and early death	Hatini PG, Commons KG.		Hatini PG	Eur J Neurosci	2020	PMC7655614	NIHMS1603631	10.1111/ejn.14776
19409490	A BAC transgenic mouse model reveals neuron subtype-specific effects of a Generalized Epilepsy with Febrile Seizures Plus (GEFS+) mutation	Tang B, Dutt K, Papale L, Rusconi R, Shankar A, Hunter J, Tufik S, Yu FH, Catterall WA, Mantegazza M, Goldin AL, Escayg A.		Tang B	Neurobiol Dis	2009	PMC2735447	NIHMS114716	10.1016/j.nbd.2009.04.007
34309607	A Behavioral Screen for Heat-Induced Seizures in Mouse Models of Epilepsy	Das A, Smith MA, O'Dowd DK.		Das A	J Vis Exp	2021			10.3791/62846
18755274	A CACNB4 mutation shows that altered Ca(v)2.1 function may be a genetic modifier of severe myoclonic epilepsy in infancy	Ohmori I, Ouchida M, Miki T, Mimaki N, Kiyonaka S, Nishiki T, Tomizawa K, Mori Y, Matsui H.		Ohmori I	Neurobiol Dis	2008			10.1016/j.nbd.2008.07.017
28102593	A case for cannabidiol in Wolf-Hirschhorn syndrome seizure management	Ho KS, Wassman ER.		Ho KS	Am J Med Genet A	2017	PMC6585685		10.1002/ajmg.a.37979
23032131	A case of autosomal dominant nocturnal frontal lobe epilepsy (ADNFLE) coexisting with pervasive developmental disorder harboring SCN1A mutation in addition to CHRNB2 mutation	Sone D, Sugawara T, Sakakibara E, Tomioka Y, Taniguchi G, Murata Y, Watanabe M, Kaneko S.		Sone D	Epilepsy Behav	2012			10.1016/j.yebeh.2012.07.027
30872930	A case of Dravet Syndrome with a newly defined mutation in the SCN1A gene	Tun?er G?, Teber S, Albayrak P, Kutluk MG, Deda G.		Tun?er G?	Turk Pediatri Ars	2018	PMC6408181		10.5152/TurkPediatriArs.2018.4197
27523882	A case of Dravet syndrome with cortical myoclonus indicated by jerk-locked back-averaging of electroencephalogram data	Kobayashi Y, Hanaoka Y, Akiayma T, Ohmori I, Ouchida M, Yamamoto T, Oka M, Yoshinaga H, Kobayashi K.		Kobayashi Y	Brain Dev	2017			10.1016/j.braindev.2016.07.005
16359470	A case of extended spectrum GEFS+	Grant AC, Vazquez B.		Grant AC	Epilepsia	2005			10.1111/j.1528-1167.2005.00357.x
20738378	A case of SUDEP in a patient with Dravet syndrome with SCN1A mutation	Le Gal F, Korff CM, Monso-Hinard C, Mund MT, Morris M, Malafosse A, Schmitt-Mechelke T.		Le Gal F	Epilepsia	2010			10.1111/j.1528-1167.2010.02691.x
19054398	A case report of a family with overlapping features of autosomal dominant febrile seizures and GEFS+	Hindocha N, Nabbout R, Elmslie F, Makoff A, Al-Chalabi A, Nashef L.		Hindocha N	Epilepsia	2009			10.1111/j.1528-1167.2008.01876.x
18804930	A catalog of SCN1A variants	Lossin C.		Lossin C	Brain Dev	2009			10.1016/j.braindev.2008.07.011
32168371	A catalogue of new incidence estimates of monogenic neurodevelopmental disorders caused by de novo variants	L¨®pez-Rivera JA, P¨¦rez-Palma E, Symonds J, Lindy AS, McKnight DA, Leu C, Zuberi S, Brunklaus A, M?ller RS, Lal D.		L¨®pez-Rivera JA	Brain	2020	PMC7174049		10.1093/brain/awaa051
18540863	A ChIP-cloning approach linking SIRT1 to transcriptional modificationof DNA targets	Torres G, Frisella PD, Yousuf SJ, Sarwar S, Baldinger L, Zakhary SM, Leheste JR.		Torres G	Biotechniques	2008			10.2144/000112748
25986186	A clinical variant in SCN1A inherited from a mosaic father cosegregates with a novel variant to cause Dravet syndrome in a consanguineous family	Tuncer FN, Gormez Z, Calik M, Altiokka Uzun G, Sagiroglu MS, Yuceturk B, Yuksel B, Baykan B, Bebek N, Iscan A, Ugur Iseri SA, Ozbek U.		Tuncer FN	Epilepsy Res	2015			10.1016/j.eplepsyres.2015.02.020
17001291	A common polymorphism in the SCN1A gene associates with phenytoin serum levels at maintenance dose	Tate SK, Singh R, Hung CC, Tai JJ, Depondt C, Cavalleri GL, Sisodiya SM, Goldstein DB, Liou HH.		Tate SK	Pharmacogenet Genomics	2006			10.1097/01.fpc.0000230114.41828.73
24417206	A common SCN1A splice-site polymorphism modifies the effect of carbamazepine on cortical excitability--a pharmacogenetic transcranial magnetic stimulation study	Menzler K, Hermsen A, Balkenhol K, Duddek C, Bugiel H, Bauer S, Schorge S, Reif PS, Klein KM, Haag A, Oertel WH, Hamer HM, Knake S, Trucks H, Sander T, Rosenow F; EPICURE-Consortium.		Menzler K	Epilepsia	2014			10.1111/epi.12515
33455486	A critical evaluation of fenfluramine hydrochloride for the treatment of Dravet syndrome	Schoonjans AS, Ceulemans B.		Schoonjans AS	Expert Rev Neurother	2021			10.1080/14737175.2021.1877540
18640800	A de novo KCNQ2 mutation detected in non-familial benign neonatal convulsions	Ishii A, Fukuma G, Uehara A, Miyajima T, Makita Y, Hamachi A, Yasukochi M, Inoue T, Yasumoto S, Okada M, Kaneko S, Mitsudome A, Hirose S.		Ishii A	Brain Dev	2009			10.1016/j.braindev.2008.05.010
27458797	A deleterious Nav1.1 mutation selectively impairs telencephalic inhibitory neurons derived from Dravet Syndrome patients	Sun Y, Pa?ca SP, Portmann T, Goold C, Worringer KA, Guan W, Chan KC, Gai H, Vogt D, Chen YJ, Mao R, Chan K, Rubenstein JL, Madison DV, Hallmayer J, Froehlich-Santino WM, Bernstein JA, Dolmetsch RE.		Sun Y	Elife	2016	PMC4961470		10.7554/eLife.13073
15715999	A family of generalized epilepsy with febrile seizures plus type 2-a new missense mutation of SCN1A found in the pedigree of several patients with complex febrile seizures	Nagao Y, Mazaki-Miyazaki E, Okamura N, Takagi M, Igarashi T, Yamakawa K.		Nagao Y	Epilepsy Res	2005			10.1016/j.eplepsyres.2004.11.005
19710327	A functional null mutation of SCN1B in a patient with Dravet syndrome	Patino GA, Claes LR, Lopez-Santiago LF, Slat EA, Dondeti RS, Chen C, O'Malley HA, Gray CB, Miyazaki H, Nukina N, Oyama F, De Jonghe P, Isom LL.		Patino GA	J Neurosci	2009	PMC2749953	NIHMS143910	10.1523/JNEUROSCI.2475-09.2009
21561445	A functional polymorphism in the SCN1A gene does not influence antiepileptic drug responsiveness in Italian patients with focal epilepsy	Manna I, Gambardella A, Bianchi A, Striano P, Tozzi R, Aguglia U, Beccaria F, Benna P, Campostrini R, Canevini MP, Condino F, Durisotti C, Elia M, Giallonardo AT, Iudice A, Labate A, La Neve A, Michelucci R, Muscas GC, Paravidino R, Zaccara G, Zucca C, Zara F, Perucca E.		Manna I	Epilepsia	2011			10.1111/j.1528-1167.2011.03097.x
18554361	A functional polymorphism in the SCN1A gene is not associated with carbamazepine dosages in Austrian patients with epilepsy	Zimprich F, Stogmann E, Bonelli S, Baumgartner C, Mueller JC, Meitinger T, Zimprich A, Strom TM.		Zimprich F	Epilepsia	2008			10.1111/j.1528-1167.2008.01549_4.x
31662442	A genome-wide search for gene-by-obesity interaction loci of dyslipidemia in Koreans shows diverse genetic risk alleles	Kang M, Sung J.		Kang M	J Lipid Res	2019	PMC6889708		10.1194/jlr.P119000226
20038948	A genome-wide survey of human short-term memory	Papassotiropoulos A, Henke K, Stefanova E, Aerni A, M¨¹ller A, Demougin P, Vogler C, Sigmund JC, Gschwind L, Huynh KD, Coluccia D, Mondadori CR, H?nggi J, Buchmann A, Kostic V, Novakovic I, van den Bussche H, Kaduszkiewicz H, Weyerer S, Bickel H, Riedel-Heller S, Pentzek M, Wiese B, Dichgans M, Wagner M, Jessen F, Maier W, de Quervain DJ.		Papassotiropoulos A	Mol Psychiatry	2011	PMC3030750		10.1038/mp.2009.133
33189042	A heterozygous SCN1A (c.A5768G/+) mutant human induced pluripotent stem cell line (USTCi002-A) generated using TALEN-mediated precise gene editing	Zhao H, Li S, Lin Z, He L, Deng W, Han X, Tang F, Cheng N, Zhou P, Huang R, Deng S, Huang J, Li Z.		Zhao H	Stem Cell Res	2020			10.1016/j.scr.2020.102058
23148524	A homozygous mutation of voltage-gated sodium channel ¦Â(I) gene SCN1B in a patient with Dravet syndrome	Ogiwara I, Nakayama T, Yamagata T, Ohtani H, Mazaki E, Tsuchiya S, Inoue Y, Yamakawa K.		Ogiwara I	Epilepsia	2012			10.1111/epi.12040
23639079	A human Dravet syndrome model from patient induced pluripotent stem cells	Higurashi N, Uchida T, Lossin C, Misumi Y, Okada Y, Akamatsu W, Imaizumi Y, Zhang B, Nabeshima K, Mori MX, Katsurabayashi S, Shirasaka Y, Okano H, Hirose S.		Higurashi N	Mol Brain	2013	PMC3655893		10.1186/1756-6606-6-19
34600281	A ketogenic diet protects DBA/1 and Scn1a(R1407X/+) mice against seizure-induced respiratory arrest independent of ketosis	Crotts MS, Kim Y, Bravo E, Richerson GB, Teran FA.		Crotts MS	Epilepsy Behav	2021			10.1016/j.yebeh.2021.108334
23055484	A knock-in model of human epilepsy in Drosophila reveals a novel cellular mechanism associated with heat-induced seizure	Sun L, Gilligan J, Staber C, Schutte RJ, Nguyen V, O'Dowd DK, Reenan R.		Sun L	J Neurosci	2012	PMC3482260	NIHMS414429	10.1523/JNEUROSCI.2932-12.2012
32773773	A longitudinal footprint of genetic epilepsies using automated electronic medical record interpretation	Ganesan S, Galer PD, Helbig KL, McKeown SE, O'Brien M, Gonzalez AK, Felmeister AS, Khankhanian P, Ellis CA, Helbig I.		Ganesan S	Genet Med	2020	PMC7708303		10.1038/s41436-020-0923-1
16122630	A missense mutation in SCN1A in brothers with severe myoclonic epilepsy in infancy (SMEI) inherited from a father with febrile seizures	Kimura K, Sugawara T, Mazaki-Miyazaki E, Hoshino K, Nomura Y, Tateno A, Hachimori K, Yamakawa K, Segawa M.		Kimura K	Brain Dev	2005			10.1016/j.braindev.2004.11.005
20410126	A missense mutation of the gene encoding voltage-dependent sodium channel (Nav1.1) confers susceptibility to febrile seizures in rats	Mashimo T, Ohmori I, Ouchida M, Ohno Y, Tsurumi T, Miki T, Wakamori M, Ishihara S, Yoshida T, Takizawa A, Kato M, Hirabayashi M, Sasa M, Mori Y, Serikawa T.		Mashimo T	J Neurosci	2010	PMC6632336		10.1523/JNEUROSCI.3360-09.2010
11371648	A missense mutation of the Na+ channel alpha II subunit gene Na(v)1.2 in a patient with febrile and afebrile seizures causes channel dysfunction	Sugawara T, Tsurubuchi Y, Agarwala KL, Ito M, Fukuma G, Mazaki-Miyazaki E, Nagafuji H, Noda M, Imoto K, Wada K, Mitsudome A, Kaneko S, Montal M, Nagata K, Hirose S, Yamakawa K.		Sugawara T	Proc Natl Acad Sci U S A	2001	PMC33477		10.1073/pnas.111065098
31265868	A more efficient conditional mouse model of Dravet syndrome: Implications for epigenetic selection and sex-dependent behaviors	Williams AD, Kalume F, Westenbroek RE, Catterall WA.		Williams AD	J Neurosci Methods	2019	PMC6686874	NIHMS1533966	10.1016/j.jneumeth.2019.108315
28544625	A mutation in GABRB3 associated with Dravet syndrome	Le SV, Le PHT, Le TKV, Kieu Huynh TT, Hang Do TT.		Le SV	Am J Med Genet A	2017			10.1002/ajmg.a.38282
33816011	A Mutation in the SCN1A Gene With a Peculiar Course: A Case Report	Sur L, Samasca G, Sur G, Gaga R, Aldea C.		Sur L	Cureus	2021	PMC8009658		10.7759/cureus.13612
17000989	A new molecular mechanism for severe myoclonic epilepsy of infancy: exonic deletions in SCN1A	Mulley JC, Nelson P, Guerrero S, Dibbens L, Iona X, McMahon JM, Harkin L, Schouten J, Yu S, Berkovic SF, Scheffer IE.		Mulley JC	Neurology	2006			10.1212/01.wnl.0000237322.04338.2b
8812438	A new sodium channel alpha-subunit gene (Scn9a) from Schwann cells maps to the Scn1a, Scn2a, Scn3a cluster of mouse chromosome 2	Beckers MC, Ernst E, Belcher S, Howe J, Levenson R, Gros P.		Beckers MC	Genomics	1996			10.1006/geno.1996.0447
15028761	A nonsense mutation of the sodium channel gene SCN2A in a patient with intractable epilepsy and mental decline	Kamiya K, Kaneda M, Sugawara T, Mazaki E, Okamura N, Montal M, Makita N, Tanaka M, Fukushima K, Fujiwara T, Inoue Y, Yamakawa K.		Kamiya K	J Neurosci	2004	PMC6729532		10.1523/JNEUROSCI.3089-03.2004
18184292	A novel ATP1A2 gene mutation in an Irish familial hemiplegic migraine kindred	Fernandez DM, Hand CK, Sweeney BJ, Parfrey NA.		Fernandez DM	Headache	2008			10.1111/j.1526-4610.2007.00848.x
23918834	A novel ATP1A2 gene mutation in familial hemiplegic migraine and epilepsy	Costa C, Prontera P, Sarchielli P, Tonelli A, Bassi MT, Cupini LM, Caproni S, Siliquini S, Donti E, Calabresi P.		Costa C	Cephalalgia	2014			10.1177/0333102413498941
24874546	A novel de novo mutation of SCN8A (Nav1.6) with enhanced channel activation in a child with epileptic encephalopathy	Estacion M, O'Brien JE, Conravey A, Hammer MF, Waxman SG, Dib-Hajj SD, Meisler MH.		Estacion M	Neurobiol Dis	2014	PMC4124819	NIHMS601488	10.1016/j.nbd.2014.05.017
21114141	A novel de novo SCN1A missense mutation in Severe Myoclonic Epilepsy Borderland	Specchio N, Trivisano M, Balestri M, Gennaro E, Specchio LM, Fusco L, Zara F, Vigevano F.		Specchio N	Acta Neurol Belg	2010
15525788	A novel epilepsy mutation in the sodium channel SCN1A identifies a cytoplasmic domain for beta subunit interaction	Spampanato J, Kearney JA, de Haan G, McEwen DP, Escayg A, Aradi I, MacDonald BT, Levin SI, Soltesz I, Benna P, Montalenti E, Isom LL, Goldin AL, Meisler MH.		Spampanato J	J Neurosci	2004	PMC6730248		10.1523/JNEUROSCI.2034-04.2004
30306542	A novel GABAergic dysfunction in human Dravet syndrome	Ruffolo G, Cifelli P, Roseti C, Thom M, van Vliet EA, Limatola C, Aronica E, Palma E.		Ruffolo G	Epilepsia	2018			10.1111/epi.14574
19339291	A novel inherited mutation in the voltage sensor region of SCN1A is associated with Panayiotopoulos syndrome in siblings and generalized epilepsy with febrile seizures plus	Livingston JH, Cross JH, Mclellan A, Birch R, Zuberi SM.		Livingston JH	J Child Neurol	2009			10.1177/0883073808324537
25569746	A novel inherited SCN1A mutation associated with different neuropsychological phenotypes: is there a common core deficit?	Passamonti C, Petrelli C, Mei D, Foschi N, Guerrini R, Provinciali L, Zamponi N.		Passamonti C	Epilepsy Behav	2015			10.1016/j.yebeh.2014.11.009
28262406	A novel inherited SCN1A mutation associated with GEFS+ in benign and encephalopathic epilepsy	Gauthier AC, Manganas LN, Mattson RH.		Gauthier AC	J Clin Neurosci	2017			10.1016/j.jocn.2017.02.011
18625863	A novel locus for generalized epilepsy with febrile seizures plus in French families	Baulac S, Gourfinkel-An I, Couarch P, Depienne C, Kaminska A, Dulac O, Baulac M, LeGuern E, Nabbout R.		Baulac S	Arch Neurol	2008			10.1001/archneur.65.7.943
21035146	A novel mutation in CACNA1A associated with hemiplegic migraine, cerebellar dysfunction and late-onset cognitive decline	Freilinger T, Ackl N, Ebert A, Schmidt C, Rautenstrauss B, Dichgans M, Danek A.		Freilinger T	J Neurol Sci	2011			10.1016/j.jns.2010.09.032
21843600	A novel SCN1A missense mutation causes generalized epilepsy with febrile seizures plus in a Chinese family	Cui X, Zeng F, Liu Y, Zhang J, Archacki S, Zhan T, Du R, Tang Z, Liu J, Wang QK, Liu M.		Cui X	Neurosci Lett	2011			10.1016/j.neulet.2011.08.001
11254445	A novel SCN1A mutation associated with generalized epilepsy with febrile seizures plus--and prevalence of variants in patients with epilepsy	Escayg A, Heils A, MacDonald BT, Haug K, Sander T, Meisler MH.		Escayg A	Am J Hum Genet	2001	PMC1275640		10.1086/319524
15694566	A novel SCN1A mutation associated with severe GEFS+ in a large South American pedigree	Pineda-Trujillo N, Carrizosa J, Cornejo W, Arias W, Franco C, Cabrera D, Bedoya G, Ru¨ªz-Linares A.		Pineda-Trujillo N	Seizure	2005			10.1016/j.seizure.2004.12.007
27919014	A novel SCN1A mutation identified in a Chinese family with familial hemiplegic migraine: A case report	Zhang Y, Chen N, Zhou M, Guo J, Guo J, He L.		Zhang Y	Cephalalgia	2017			10.1177/0333102416677049
24842605	A novel SCN1A mutation in a cytoplasmic loop in intractable juvenile myoclonic epilepsy without febrile seizures	Jingami N, Matsumoto R, Ito H, Ishii A, Ihara Y, Hirose S, Ikeda A, Takahashi R.		Jingami N	Epileptic Disord	2014			10.1684/epd.2014.0657
33042244	A Novel SCN1A Mutation: A Case Report	Aslan M, Ozgor B, Kirik S, Gungor S.		Aslan M	J Pediatr Neurosci	2020	PMC7519752		10.4103/jpn.JPN_118_18
22596016	A novel STXBP1 mutation causes focal seizures with neonatal onset	Vatta M, Tennison MB, Aylsworth AS, Turcott CM, Guerra MP, Eng CM, Yang Y.		Vatta M	J Child Neurol	2012			10.1177/0883073811435246
15827091	A novel susceptibility locus at 2p24 for generalised epilepsy with febrile seizures plus	Audenaert D, Claes L, Claeys KG, Deprez L, Van Dyck T, Goossens D, Del-Favero J, Van Paesschen W, Van Broeckhoven C, De Jonghe P.		Audenaert D	J Med Genet	2005	PMC1735961		10.1136/jmg.2005.031393
31102827	A novel variant in SCN1A gene associated with Dravet syndrome	Pathirana B, Hettiarachchi D, Neththikumara NF, Ratnayake PD, Dissanayake V.		Pathirana B	Seizure	2019			10.1016/j.seizure.2019.05.003
24464349	A novel variant in the 3' UTR of human SCN1A gene from a patient with Dravet syndrome decreases mRNA stability mediated by GAPDH's binding	Zeng T, Dong ZF, Liu SJ, Wan RP, Tang LJ, Liu T, Zhao QH, Shi YW, Yi YH, Liao WP, Long YS.		Zeng T	Hum Genet	2014			10.1007/s00439-014-1422-8
16059449	A plethora of SCN1A mutations: what can they tell us?	Wallace R.		Wallace R	Epilepsy Curr	2005	PMC1176321		10.1111/j.1535-7597.2005.05105.x
26969601	A Point Mutation in SCN1A 5' Genomic Region Decreases the Promoter Activity and Is Associated with Mild Epilepsy and Seizure Aggravation Induced by Antiepileptic Drug	Gao QW, Hua LD, Wang J, Fan CX, Deng WY, Li B, Bian WJ, Shao CX, He N, Zhou P, Liao WP, Shi YW.		Gao QW	Mol Neurobiol	2017			10.1007/s12035-016-9800-y
21531204	A putative disease-associated haplotype within the SCN1A gene in Dravet syndrome	Fendri-Kriaa N, Boujilbene S, Kammoun F, Mkaouar-Rebai E, Ben Mahmoud A, Hsairi I, Rebai A, Triki C, Fakhfakh F.		Fendri-Kriaa N	Biochem Biophys Res Commun	2011			10.1016/j.bbrc.2011.04.079
19402159	A rescuable folding defective Nav1.1 (SCN1A) sodium channel mutant causes GEFS+: common mechanism in Nav1.1 related epilepsies?	Rusconi R, Combi R, Cest¨¨le S, Grioni D, Franceschetti S, Dalpr¨¤ L, Mantegazza M.		Rusconi R	Hum Mutat	2009			10.1002/humu.21041
21219303	A retrospective study of the relation between vaccination and occurrence of seizures in Dravet syndrome	Tro-Baumann B, von Spiczak S, Lotte J, Bast T, Haberlandt E, Sassen R, Freund A, Leiz S, Stephani U, Boor R, Holthausen H, Helbig I, Kluger G.		Tro-Baumann B	Epilepsia	2011			10.1111/j.1528-1167.2010.02885.x
18197881	A review of the genetic relation between migraine and epilepsy	Haan J, Terwindt GM, van den Maagdenberg AM, Stam AH, Ferrari MD.		Haan J	Cephalalgia	2008			10.1111/j.1468-2982.2007.01460.x
19763161	A role of SCN9A in human epilepsies, as a cause of febrile seizures and as a potential modifier of Dravet syndrome	Singh NA, Pappas C, Dahle EJ, Claes LR, Pruess TH, De Jonghe P, Thompson J, Dixon M, Gurnett C, Peiffer A, White HS, Filloux F, Leppert MF.		Singh NA	PLoS Genet	2009	PMC2730533		10.1371/journal.pgen.1000649
18076640	A screening test for the prediction of Dravet syndrome before one year of age	Hattori J, Ouchida M, Ono J, Miyake S, Maniwa S, Mimaki N, Ohtsuka Y, Ohmori I.		Hattori J	Epilepsia	2008			10.1111/j.1528-1167.2007.01475.x
10486327	A second locus for familial generalized epilepsy with febrile seizures plus maps to chromosome 2q21-q33	Baulac S, Gourfinkel-An I, Picard F, Rosenberg-Bourgin M, Prud'homme JF, Baulac M, Brice A, LeGuern E.		Baulac S	Am J Hum Genet	1999	PMC1288241		10.1086/302593
32335140	A selective Na(V)1.1 activator with potential for treatment of Dravet syndrome epilepsy	Chow CY, Chin YKY, Ma L, Undheim EAB, Herzig V, King GF.		Chow CY	Biochem Pharmacol	2020			10.1016/j.bcp.2020.113991
31864146	A single-center, retrospective analysis of genotype-phenotype correlations in children with Dravet syndrome	Gertler TS, Calhoun J, Laux L.		Gertler TS	Seizure	2020	PMC7112984	NIHMS1548083	10.1016/j.seizure.2019.12.009
28635024	A small molecule activator of Na(v) 1.1 channels increases fast-spiking interneuron excitability and GABAergic transmission in?vitro and has anti-convulsive effects in?vivo	Frederiksen K, Lu D, Yang J, Jensen HS, Bastlund JF, Larsen PH, Liu H, Crestey F, Dekermendjian K, Badolo L, Laursen M, Hougaard C, Yang C, Svenstrup N, Grunnet M.		Frederiksen K	Eur J Neurosci	2017			10.1111/ejn.13626
11118488	A sodium channel mutation causing epilepsy in man exhibits subtle defects in fast inactivation and activation in vitro	Alekov A, Rahman MM, Mitrovic N, Lehmann-Horn F, Lerche H.		Alekov A	J Physiol	2000	PMC2270215		10.1111/j.1469-7793.2000.00533.x
20420834	A sodium channel mutation linked to epilepsy increases ramp and persistent current of Nav1.3 and induces hyperexcitability in hippocampal neurons	Estacion M, Gasser A, Dib-Hajj SD, Waxman SG.		Estacion M	Exp Neurol	2010			10.1016/j.expneurol.2010.04.012
19289736	A splice site variant in the sodium channel gene SCN1A confers risk of febrile seizures	Schlachter K, Gruber-Sedlmayr U, Stogmann E, Lausecker M, Hotzy C, Balzar J, Schuh E, Baumgartner C, Mueller JC, Illig T, Wichmann HE, Lichtner P, Meitinger T, Strom TM, Zimprich A, Zimprich F.		Schlachter K	Neurology	2009			10.1212/01.wnl.0000344401.02915.00
32581296	A Study among the Genotype, Functional Alternations, and Phenotype of 9 SCN1A Mutations in Epilepsy Patients	Kluckova D, Kolnikova M, Lacinova L, Jurkovicova-Tarabova B, Foltan T, Demko V, Kadasi L, Ficek A, Soltysova A.		Kluckova D	Sci Rep	2020	PMC7314844		10.1038/s41598-020-67215-y
33677403	A systematic review of adults with Dravet syndrome	Selvarajah A, Zulfiqar-Ali Q, Marques P, Rong M, Andrade DM.		Selvarajah A	Seizure	2021			10.1016/j.seizure.2021.02.025
27029629	A targeted resequencing gene panel for focal epilepsy	Hildebrand MS, Myers CT, Carvill GL, Regan BM, Damiano JA, Mullen SA, Newton MR, Nair U, Gazina EV, Milligan CJ, Reid CA, Petrou S, Scheffer IE, Berkovic SF, Mefford HC.		Hildebrand MS	Neurology	2016	PMC4844234		10.1212/WNL.0000000000002608
30104343	A Transient Developmental Window of Fast-Spiking Interneuron Dysfunction in a Mouse Model of Dravet Syndrome	Favero M, Sotuyo NP, Lopez E, Kearney JA, Goldberg EM.		Favero M	J Neurosci	2018	PMC6125809		10.1523/JNEUROSCI.0193-18.2018
30659983	A two-hit story: Seizures and genetic mutation interaction sets phenotype severity in SCN1A epilepsies	Salgueiro-Pereira AR, Duprat F, Pousinha PA, Loucif A, Douchamps V, Regondi C, Ayrault M, Eugie M, Stunault MI, Escayg A, Goutagny R, Gnatkovsky V, Frassoni C, Marie H, Bethus I, Mantegazza M.		Salgueiro-Pereira AR	Neurobiol Dis	2019			10.1016/j.nbd.2019.01.006
33333793	A Wide Spectrum of Genetic Disorders Causing Severe Childhood Epilepsy in Taiwan: A Case Series of Ultrarare Genetic Cause and Novel Mutation Analysis in a Pilot Study	Hong SY, Yang JJ, Li SY, Lee IC.		Hong SY	J Pers Med	2020	PMC7765181		10.3390/jpm10040281
34411648	ABCB1 c.3435C?>?T and EPHX1 c.416A?>?G polymorphisms influence plasma carbamazepine concentration, metabolism, and pharmacoresistance in epileptic patients	Zhang ML, Chen XL, Bai ZF, Zhao X, Li WX, Wang XY, Zhang H, Chen XF, Zhang SQ, Tang JF, Xiao XH, Zhao YL.		Zhang ML	Gene	2021			10.1016/j.gene.2021.145907
26189305	ABCB1, ABCC2, SCN1A, SCN2A, GABRA1 gene polymorphisms and drug resistant epilepsy in the Chinese Han population	Zhou L, Cao Y, Long H, Long L, Xu L, Liu Z, Zhang Y, Xiao B.		Zhou L	Pharmazie	2015
27267376	Aberrant epilepsy-associated mutant Nav1.6 sodium channel activity can be targeted with cannabidiol	Patel RR, Barbosa C, Brustovetsky T, Brustovetsky N, Cummins TR.		Patel RR	Brain	2016	PMC4958898		10.1093/brain/aww129
30526861	Aberrant Inclusion of a Poison Exon Causes Dravet Syndrome and Related SCN1A-Associated Genetic Epilepsies	Carvill GL, Engel KL, Ramamurthy A, Cochran JN, Roovers J, Stamberger H, Lim N, Schneider AL, Hollingsworth G, Holder DH, Regan BM, Lawlor J, Lagae L, Ceulemans B, Bebin EM, Nguyen J; EuroEPINOMICS Rare Epilepsy Syndrome, Myoclonic-Astatic Epilepsy, and Dravet Working Group, Barsh GS, Weckhuysen S, Meisler M, Berkovic SF, De Jonghe P, Scheffer IE, Myers RM, Cooper GM, Mefford HC.		Carvill GL	Am J Hum Genet	2018	PMC6288405		10.1016/j.ajhg.2018.10.023
33411788	Aberrant regulation of a poison exon caused by a non-coding variant in a mouse model of Scn1a-associated epileptic encephalopathy	Voskobiynyk Y, Battu G, Felker SA, Cochran JN, Newton MP, Lambert LJ, Kesterson RA, Myers RM, Cooper GM, Roberson ED, Barsh GS.		Voskobiynyk Y	PLoS Genet	2021	PMC7790302		10.1371/journal.pgen.1009195
31879226	Abnormal brain gamma oscillations in response to auditory stimulation in Dravet syndrome	Sanchez-Carpintero R, Urrestarazu E, Cieza S, Alegre M, Artieda J, Crespo-Eguilaz N, Valencia M.		Sanchez-Carpintero R	Eur J Paediatr Neurol	2020			10.1016/j.ejpn.2019.12.004
29578003	Abnormal changes in voltage-gated sodium channels subtypes Na(V)1.1, Na(V)1.2, Na(V)1.3, Na(V)1.6 and CaM/CaMKII pathway in low-grade astrocytoma	Guan G, Zhao M, Xu X, Boczek T, Mao X, Li Z, Gao Q, Li J, Zhao D, Niu W, Lei L, Guo F.		Guan G	Neurosci Lett	2018			10.1016/j.neulet.2018.03.047
14642997	Absence of mutations in major GEFS+ genes in myoclonic astatic epilepsy	Nabbout R, Kozlovski A, Gennaro E, Bahi-Buisson N, Zara F, Chiron C, Bianchi A, Brice A, Leguern E, Dulac O.		Nabbout R	Epilepsy Res	2003			10.1016/j.eplepsyres.2003.08.007
21994381	Action potential generation at an axon initial segment-like process in the axonless retinal AII amacrine cell	Wu C, Ivanova E, Cui J, Lu Q, Pan ZH.		Wu C	J Neurosci	2011	PMC3228603	NIHMS331771	10.1523/JNEUROSCI.1861-11.2011
25924876	Activity of drugs and components of natural origin in the severe myoclonic epilepsy of infancy (Dravet syndrome)	Berio A, Piazzi A.		Berio A	Cent Nerv Syst Agents Med Chem	2015			10.2174/1871524915666150430161321
21647847	Acute encephalopathy in a patient with Dravet syndrome	Tsuji M, Mazaki E, Ogiwara I, Wada T, Iai M, Okumura A, Yamashita S, Yamakawa K, Osaka H.		Tsuji M	Neuropediatrics	2011			10.1055/s-0031-1279725
22092154	Acute encephalopathy in children with Dravet syndrome	Okumura A, Uematsu M, Imataka G, Tanaka M, Okanishi T, Kubota T, Sudo A, Tohyama J, Tsuji M, Ohmori I, Naiki M, Hiraiwa-Sofue A, Sato H, Saitoh S, Shimizu T.		Okumura A	Epilepsia	2012			10.1111/j.1528-1167.2011.03311.x
20491869	Acute encephalopathy with a truncation mutation in the SCN1A gene: a case report	Takayanagi M, Haginoya K, Umehara N, Kitamura T, Numata Y, Wakusawa K, Hino-Fukuyo N, Mazaki E, Yamakawa K, Ohura T, Ohtake M.		Takayanagi M	Epilepsia	2010			10.1111/j.1528-1167.2010.02600.x
17697789	Acute hepatic injury in four children with Dravet syndrome: valproic acid, topiramate or acetaminophen?	Nicolai J, Gunning B, Leroy PL, Ceulemans B, Vles JS.		Nicolai J	Seizure	2008			10.1016/j.seizure.2007.07.003
19303743	Addition of verapamil in the treatment of severe myoclonic epilepsy in infancy	Iannetti P, Parisi P, Spalice A, Ruggieri M, Zara F.		Iannetti P	Epilepsy Res	2009			10.1016/j.eplepsyres.2009.02.014
22226577	Additional information regarding "Dravet syndrome: inroads into understanding epileptic encephalopathies"	Kobayashi K, Ohtsuka Y, Ohmori I.		Kobayashi K	J Pediatr	2012			10.1016/j.jpeds.2011.11.058
31870807	Adolescent behavioral abnormalities in a Scn1a(+/-) mouse model of Dravet syndrome	Bahceci D, Anderson LL, Occelli Hanbury Brown CV, Zhou C, Arnold JC.		Bahceci D	Epilepsy Behav	2020			10.1016/j.yebeh.2019.106842
28186331	Adult motor phenotype differentiates Dravet syndrome from Lennox-Gastaut syndrome and links SCN1A to early onset parkinsonian features	Aljaafari D, Fasano A, Nascimento FA, Lang AE, Andrade DM.		Aljaafari D	Epilepsia	2017			10.1111/epi.13692
22670143	Adult Phenotypes in Angelman- and Rett-Like Syndromes	Willemsen MH, Rensen JH, van Schrojenstein-Lantman de Valk HM, Hamel BC, Kleefstra T.		Willemsen MH	Mol Syndromol	2012	PMC3366698		10.1159/000335661
21371021	Adults with a history of possible Dravet syndrome: an illustration of the importance of analysis of the SCN1A gene	Verbeek NE, van Kempen M, Gunning WB, Renier WO, Westland B, Lindhout D, Brilstra EH.		Verbeek NE	Epilepsia	2011			10.1111/j.1528-1167.2011.02982.x
31226929	Advances in genetics of migraine	Sutherland HG, Albury CL, Griffiths LR.		Sutherland HG	J Headache Pain	2019	PMC6734342		10.1186/s10194-019-1017-9
33275464	Advances in the design and discovery of novel small molecule drugs for the treatment of Dravet Syndrome	Miziak B, Czuczwar S.		Miziak B	Expert Opin Drug Discov	2021			10.1080/17460441.2021.1857722
19666877	Advances in the identification and management of severe epilepsy syndromes of early childhood: focus on SCN1A	Douglass LM.		Douglass LM	J Child Neurol	2009			10.1177/0883073809338149
25312505	Advances on genetic rat models of epilepsy	Serikawa T, Mashimo T, Kuramoro T, Voigt B, Ohno Y, Sasa M.		Serikawa T	Exp Anim	2015	PMC4329510		10.1538/expanim.14-0066
20832659	Advances on the genetics of Mendelian idiopathic epilepsies	Baulac S, Baulac M.		Baulac S	Clin Lab Med	2010			10.1016/j.cll.2010.07.008
19853223	Advances on the genetics of mendelian idiopathic epilepsies	Baulac S, Baulac M.		Baulac S	Neurol Clin	2009			10.1016/j.ncl.2009.07.001
28566552	Advancing the phenome alongside the genome in epilepsy studies	Helbig I, Lindhout D.		Helbig I	Neurology	2017			10.1212/WNL.0000000000004053
32031527	Age-dependent epileptic encephalopathy associated with an unusual co-occurrence of ZEB2 and SCN1A variants	Nardello R, Fontana A, Donato Mangano G, Efthymiou S, Salpietro V, Houlden H, Mangano S.		Nardello R	Epileptic Disord	2020			10.1684/epd.2020.1138
28683344	Age-related "Sleep/nocturnal" tonic and tonic clonic seizure clusters are underdiagnosed in patients with Dravet Syndrome	Losito E, Kuchenbuch M, Chemaly N, Laschet J, Chiron C, Kaminska A, Nabbout R.		Losito E	Epilepsy Behav	2017			10.1016/j.yebeh.2017.05.037
34147886	Age-related evolution of EEG in Dravet syndrome: Meta-analysis of 155 patients	Minato E, Myers KA.		Minato E	Seizure	2021			10.1016/j.seizure.2021.06.007
21844054	Alleged cases of vaccine encephalopathy rediagnosed years later as Dravet syndrome	Reyes IS, Hsieh DT, Laux LC, Wilfong AA.		Reyes IS	Pediatrics	2011			10.1542/peds.2010-0887
27790929	Allele and genotype frequencies of genes relevant to anti-epileptic drug therapy in Mexican-Mestizo healthy volunteers	Fricke-Galindo I, Ortega-V¨¢zquez A, Monroy-Jaramillo N, Dorado P, Jung-Cook H, Pe?as-Lled¨® E, LLerena A, L¨®pez-L¨®pez M.		Fricke-Galindo I	Pharmacogenomics	2016			10.2217/pgs-2016-0078
33450277	Allosteric modulation of the cannabinoid 2 receptor confers seizure resistance in mice	Shapiro L, Gado F, Manera C, Escayg A.		Shapiro L	Neuropharmacology	2021			10.1016/j.neuropharm.2021.108448
32793597	Alterations of the Hippocampal Neurogenic Niche in a Mouse Model of Dravet Syndrome	Mart¨ªn-Su¨¢rez S, Abiega O, Ricobaraza A, Hernandez-Alcoceba R, Encinas JM.		Mart¨ªn-Su¨¢rez S	Front Cell Dev Biol	2020	PMC7385077		10.3389/fcell.2020.00654
24155976	Altered cardiac electrophysiology and SUDEP in a model of Dravet syndrome	Auerbach DS, Jones J, Clawson BC, Offord J, Lenk GM, Ogiwara I, Yamakawa K, Meisler MH, Parent JM, Isom LL.		Auerbach DS	PLoS One	2013	PMC3796479		10.1371/journal.pone.0077843
20100831	Altered function of the SCN1A voltage-gated sodium channel leads to gamma-aminobutyric acid-ergic (GABAergic) interneuron abnormalities	Martin MS, Dutt K, Papale LA, Dub¨¦ CM, Dutton SB, de Haan G, Shankar A, Tufik S, Meisler MH, Baram TZ, Goldin AL, Escayg A.		Martin MS	J Biol Chem	2010	PMC2843231		10.1074/jbc.M109.078568
27066534	Altered Glycolysis and Mitochondrial Respiration in a Zebrafish Model of Dravet Syndrome	Kumar MG, Rowley S, Fulton R, Dinday MT, Baraban SC, Patel M.		Kumar MG	eNeuro	2016	PMC4820792		10.1523/ENEURO.0008-16.2016
23945787	Altered PKA modulation in the Na(v)1.1 epilepsy variant I1656M	Liu S, Zheng P.		Liu S	J Neurophysiol	2013			10.1152/jn.00921.2012
23311867	Altered sleep regulation in a mouse model of SCN1A-derived genetic epilepsy with febrile seizures plus (GEFS+)	Papale LA, Makinson CD, Christopher Ehlen J, Tufik S, Decker MJ, Paul KN, Escayg A.		Papale LA	Epilepsia	2013	PMC3703918	NIHMS418323	10.1111/epi.12060
21890636	Alternative splicing modulates inactivation of type 1 voltage-gated sodium channels by toggling an amino acid in the first S3-S4 linker	Fletcher EV, Kullmann DM, Schorge S.		Fletcher EV	J Biol Chem	2011	PMC3196094		10.1074/jbc.M111.250225
17877748	Amino acid changes in the amino terminus of the Na,K-adenosine triphosphatase alpha-2 subunit associated to familial and sporadic hemiplegic migraine	Tonelli A, Gallanti A, Bersano A, Cardin V, Ballabio E, Airoldi G, Redaelli F, Candelise L, Bresolin N, Bassi MT.		Tonelli A	Clin Genet	2007			10.1111/j.1399-0004.2007.00892.x
11860490	AMPA receptor activation induces association of G-beta protein with the alpha subunit of the sodium channel in neurons	Marin P, Fagni L, Torrens Y, Alcaraz G, Couraud F, Bockaert J, Glowinski J, Pr¨¦mont J.		Marin P	Eur J Neurosci	2001			10.1046/j.0953-816x.2001.01827.x
26096185	Amplicon Resequencing Identified Parental Mosaicism for Approximately 10% of "de novo" SCN1A Mutations in Children with Dravet Syndrome	Xu X, Yang X, Wu Q, Liu A, Yang X, Ye AY, Huang AY, Li J, Wang M, Yu Z, Wang S, Zhang Z, Wu X, Wei L, Zhang Y.		Xu X	Hum Mutat	2015	PMC5034833		10.1002/humu.22819
16525050	An epilepsy mutation in the sodium channel SCN1A that decreases channel excitability	Barela AJ, Waddy SP, Lickfett JG, Hunter J, Anido A, Helmers SL, Goldin AL, Escayg A.		Barela AJ	J Neurosci	2006	PMC6675156		10.1523/JNEUROSCI.2977-05.2006
19809937	An inherited nonsense R1645X mutation in neuronal sodium channel alpha1-subunit gene in a Turkish patient with severe myoclonic epilepsy of infancy	G?kben S, Berdeli A, Serdaro?lu G.		G?kben S	Neuropediatrics	2009			10.1055/s-0029-1234083
31718537	An integrative methodology based on protein-protein interaction networks for identification and functional annotation of disease-relevant genes applied to channelopathies	Mar¨ªn M, Esteban FJ, Ram¨ªrez-Rodrigo H, Ros E, S¨¢ez-Lara MJ.		Mar¨ªn M	BMC Bioinformatics	2019	PMC6849233		10.1186/s12859-019-3162-1
21416599	An interstitial duplication at 2q24.3 involving the SCN1A, SCN2A, SCN3A genes associated with infantile epilepsy	Raymond G, Wohler E, Dinsmore C, Cox J, Johnston M, Batista D, Wang T.		Raymond G	Am J Med Genet A	2011			10.1002/ajmg.a.33929
31116409	An Old Drug for a New Indication: Repurposing Fenfluramine From an Anorexigen to an Antiepileptic Drug	Schoonjans AS, Ceulemans B.		Schoonjans AS	Clin Pharmacol Ther	2019			10.1002/cpt.1469
17636062	An open-label trial of levetiracetam in severe myoclonic epilepsy of infancy	Striano P, Coppola A, Pezzella M, Ciampa C, Specchio N, Ragona F, Mancardi MM, Gennaro E, Beccaria F, Capovilla G, Rasmini P, Besana D, Coppola GG, Elia M, Granata T, Vecchi M, Vigevano F, Viri M, Gaggero R, Striano S, Zara F.		Striano P	Neurology	2007			10.1212/01.wnl.0000265222.24102.db
26410685	An Scn1a epilepsy mutation in Scn8a alters seizure susceptibility and behavior	Makinson CD, Dutt K, Lin F, Papale LA, Shankar A, Barela AJ, Liu R, Goldin AL, Escayg A.		Makinson CD	Exp Neurol	2016	PMC4688066	NIHMS738093	10.1016/j.expneurol.2015.09.008
18539001	An unexpected EEG course in Dravet syndrome	Nabbout R, Desguerre I, Sabbagh S, Depienne C, Plouin P, Dulac O, Chiron C.		Nabbout R	Epilepsy Res	2008			10.1016/j.eplepsyres.2008.04.015
26503606	An update on transcriptional and post-translational regulation of brain voltage-gated sodium channels	Onwuli DO, Beltran-Alvarez P.		Onwuli DO	Amino Acids	2016	PMC4752963		10.1007/s00726-015-2122-y
33071616	Analysis of Genetic Variants in SCN1A, SCN2A, KCNK18, TRPA1 and STX1A as a Possible Marker of Migraine	Kowalska M, Prendecki M, Kapelusiak-Pielok M, Grzelak T, ?agan-J?drzejczyk U, Wiszniewska M, Kozubski W, Dorszewska J.		Kowalska M	Curr Genomics	2020	PMC7521035		10.2174/1389202921666200415181222
25951140	Analysis of mutations in 7 genes associated with neuronal excitability and synaptic transmission in a cohort of children with non-syndromic infantile epileptic encephalopathy	Kwong AK, Ho AC, Fung CW, Wong VC.		Kwong AK	PLoS One	2015	PMC4423861		10.1371/journal.pone.0126446
20431604	Analysis of SCN1A mutation and parental origin in patients with Dravet syndrome	Sun H, Zhang Y, Liu X, Ma X, Yang Z, Qin J, Jiang Y, Qi Y, Wu X.		Sun H	J Hum Genet	2010			10.1038/jhg.2010.39
24850485	Antecollis and levodopa-responsive parkinsonism are late features of Dravet syndrome	Fasano A, Borlot F, Lang AE, Andrade DM.		Fasano A	Neurology	2014	PMC4113465		10.1212/WNL.0000000000000521
34412058	Antisense Oligonucleotide Therapy for Neurodevelopmental Disorders	Hill SF, Meisler MH.		Hill SF	Dev Neurosci	2021	PMC8440367	NIHMS1716542	10.1159/000517686
32848094	Antisense oligonucleotides increase Scn1a expression and reduce seizures and SUDEP incidence in a mouse model of Dravet syndrome	Han Z, Chen C, Christiansen A, Ji S, Lin Q, Anumonwo C, Liu C, Leiser SC, Meena, Aznarez I, Liau G, Isom LL.		Han Z	Sci Transl Med	2020			10.1126/scitranslmed.aaz6100
22098725	Are SCN1A gene mutations responsible for genetic susceptibility to subacute sclerosing panencephalitis?	Garg RK.		Garg RK	Med Hypotheses	2012			10.1016/j.mehy.2011.10.037
30368457	Assessment of parental mosaicism in SCN1A-related epilepsy by single-molecule molecular inversion probes and next-generation sequencing	de Lange IM, Koudijs MJ, van 't Slot R, Sonsma ACM, Mulder F, Carbo EC, van Kempen MJA, Nijman IJ, Ernst RF, Savelberg SMC, Knoers NVAM, Brilstra EH, Koeleman BPC.		de Lange IM	J Med Genet	2019			10.1136/jmedgenet-2018-105672
26314341	Association between PK/PD-involved gene polymorphisms and carbamazepine-individualized therapy	Ma CL, Jiao Z, Wu XY, Hong Z, Wu ZY, Zhong MK.		Ma CL	Pharmacogenomics	2015			10.2217/pgs.15.94
29649454	Association between SCN1A and SCN2A mutations and clinical/EEG features in Chinese patients from epilepsy or severe seizures	Kong Y, Yan K, Hu L, Wang M, Dong X, Lu Y, Wu B, Wang H, Yang L, Zhou W.		Kong Y	Clin Chim Acta	2018			10.1016/j.cca.2018.03.027
29353705	Association between SCN1A gene polymorphisms and drug resistant epilepsy in pediatric patients	Margari L, Legrottaglie AR, Vincenti A, Coppola G, Operto FF, Buttiglione M, Cassano A, Bartolomeo N, Mariggi¨° MA.		Margari L	Seizure	2018			10.1016/j.seizure.2018.01.002
34218210	Association between SCN1A polymorphism and carbamazepine responsiveness in epilepsy: A meta-analysis	Zhang X, Liu J, Ye J.		Zhang X	Epilepsy Res	2021			10.1016/j.eplepsyres.2021.106627
18489610	Association between SCN1A polymorphism and carbamazepine-resistant epilepsy	Abe T, Seo T, Ishitsu T, Nakagawa T, Hori M, Nakagawa K.		Abe T	Br J Clin Pharmacol	2008	PMC2492927		10.1111/j.1365-2125.2008.03203.x
30413604	Association between SCN1A polymorphism rs3812718 and valproic acid resistance in epilepsy children: a case-control study and meta-analysis	Wang ZJ, Chen J, Chen HL, Zhang LY, Xu D, Jiang WT.		Wang ZJ	Biosci Rep	2018	PMC6435549		10.1042/BSR20181654
33519675	Association Between SCN1A rs2298771, SCN1A rs10188577, SCN2A rs17183814, and SCN2A rs2304016 Polymorphisms and Responsiveness to Antiepileptic Drugs: A Meta-Analysis	Li M, Zhong R, Lu Y, Zhao Q, Li G, Lin W.		Li M	Front Neurol	2021	PMC7840883		10.3389/fneur.2020.591828
24921390	Association between two functional SNPs of SCN1A gene and efficacy of carbamazepine monotherapy for focal seizures in Chinese Han epileptic patients	Wang P, Zhou Q, Sheng Y, Tang B, Liu Z, Zhou B.		Wang P	Zhong Nan Da Xue Xue Bao Yi Xue Ban	2014			10.3969/j.issn.1672-7347.2014.05.001
29582177	Association between two SCN1A polymorphisms and resistance to sodium channel blocking AEDs: a meta-analysis	Bao Y, Liu X, Xiao Z.		Bao Y	Neurol Sci	2018			10.1007/s10072-018-3308-3
24861996	Association of ABCB1,?CYP3A4,?EPHX1,?FAS,?SCN1A,?MICA, and?BAG6 polymorphisms with the risk of carbamazepine-induced Stevens-Johnson syndrome/toxic epidermal necrolysis in Chinese Han patients with epilepsy	He XJ, Jian LY, He XL, Tang M, Wu Y, Xu YY, Sun XJ, Zhao LM.		He XJ	Epilepsia	2014			10.1111/epi.12655
24480790	Association of nonsense mutation in GABRG2 with abnormal trafficking of GABAA receptors in severe epilepsy	Ishii A, Kanaumi T, Sohda M, Misumi Y, Zhang B, Kakinuma N, Haga Y, Watanabe K, Takeda S, Okada M, Ueno S, Kaneko S, Takashima S, Hirose S.		Ishii A	Epilepsy Res	2014			10.1016/j.eplepsyres.2013.12.005
22188362	Association of polymorphisms in EPHX1, UGT2B7, ABCB1, ABCC2, SCN1A and SCN2A genes with carbamazepine therapy optimization	Hung CC, Chang WL, Ho JL, Tai JJ, Hsieh TJ, Huang HC, Hsieh YW, Liou HH.		Hung CC	Pharmacogenomics	2012			10.2217/pgs.11.141
27956748	Association of rare missense variants in the second intracellular loop of Na(V)1.7 sodium channels with familial autism	Rubinstein M, Patowary A, Stanaway IB, McCord E, Nesbitt RR, Archer M, Scheuer T, Nickerson D, Raskind WH, Wijsman EM, Bernier R, Catterall WA, Brkanac Z.		Rubinstein M	Mol Psychiatry	2018	PMC5468514	NIHMS823867	10.1038/mp.2016.222
28144265	Association of SCN1A gene polymorphism with antiepileptic drug responsiveness in the population of Thrace, Greece	Angelopoulou C, Veletza S, Heliopoulos I, Vadikolias K, Tripsianis G, Stathi C, Piperidou C.		Angelopoulou C	Arch Med Sci	2017	PMC5206360		10.5114/aoms.2016.59737
25268096	Association of SCN1A gene polymorphisms with infantile spasms and adrenocorticotropic hormone responsiveness	Zhang Y, Zou LP, Ding YX, He B, Yang G.		Zhang Y	Eur Rev Med Pharmacol Sci	2014
32185219	Association of SCN1A, SCN2A, and UGT2B7 Polymorphisms with Responsiveness to Valproic Acid in the Treatment of Epilepsy	Lu Y, Su Q, Li M, Dayimu A, Dai X, Wang Z, Che F, Xue F.		Lu Y	Biomed Res Int	2020	PMC7063186		10.1155/2020/8096235
25669891	Association of severe myoclonic epilepsy of infancy (SMEI) with probable autoimmune lymphoproliferative syndrome-variant	Berio A, Mangiante G, Piazzi A.		Berio A	Pediatr Med Chir	2014			10.4081/pmc.2014.100
25155934	Association?of SCN1A, SCN2A and ABCC2 gene polymorphisms with the response to antiepileptic drugs in Chinese Han patients with epilepsy	Ma CL, Wu XY, Zheng J, Wu ZY, Hong Z, Zhong MK.		Ma CL	Pharmacogenomics	2014			10.2217/pgs.14.89
33756436	Associations between CYP3A4, CYP3A5 and SCN1A polymorphisms and carbamazepine metabolism in epilepsy: A meta-analysis	Zhao GX, Zhang Z, Cai WK, Shen ML, Wang P, He GH.		Zhao GX	Epilepsy Res	2021			10.1016/j.eplepsyres.2021.106615
20147455	Astrocytes within multiple sclerosis lesions upregulate sodium channel Nav1.5	Black JA, Newcombe J, Waxman SG.		Black JA	Brain	2010			10.1093/brain/awq003
32105008	Ataxia, tremor, intellectual disability: a case of STXBP1 encephalopathy with a new mutation	De?erliyurt A, Kesen GG, Ceylaner S.		De?erliyurt A	Turk J Pediatr	2019			10.24953/turkjped.2019.05.015
27445835	ATP1A2 Mutations in Migraine: Seeing through the Facets of an Ion Pump onto the Neurobiology of Disease	Friedrich T, Tavraz NN, Junghans C.		Friedrich T	Front Physiol	2016	PMC4914835		10.3389/fphys.2016.00239
24328833	Atypical multifocal Dravet syndrome lacks generalized seizures and may show later cognitive decline	Kim YO, Bellows S, McMahon JM, Iona X, Damiano J, Dibbens L, Kelley K, Gill D, Cross JH, Berkovic SF, Scheffer IE.		Kim YO	Dev Med Child Neurol	2014			10.1111/dmcn.12322
33069731	Atypical myelinogenesis and reduced axon caliber in the Scn1a variant model of Dravet syndrome: An electron microscopy pilot study of the developing and mature mouse corpus callosum	Richards K, Jancovski N, Hanssen E, Connelly A, Petrou S.		Richards K	Brain Res	2021			10.1016/j.brainres.2020.147157
27231140	Audit of use of stiripentol in adults with Dravet syndrome	Balestrini S, Sisodiya SM.		Balestrini S	Acta Neurol Scand	2017	PMC5157719		10.1111/ane.12611
30605686	Augmented Reticular Thalamic Bursting and Seizures in Scn1a-Dravet Syndrome	Ritter-Makinson S, Clemente-Perez A, Higashikubo B, Cho FS, Holden SS, Bennett E, Chkhaidze A, Eelkman Rooda OHJ, Cornet MC, Hoebeek FE, Yamakawa K, Cilio MR, Delord B, Paz JT.		Ritter-Makinson S	Cell Rep	2019	PMC6555418	NIHMS1517849	10.1016/j.celrep.2018.12.018
30673603	Augmented Reticular Thalamic Bursting and Seizures in Scn1a-Dravet Syndrome	Ritter-Makinson S, Clemente-Perez A, Higashikubo B, Cho FS, Holden SS, Bennett E, Chkhaidze A, Eelkman Rooda OHJ, Cornet MC, Hoebeek FE, Yamakawa K, Cilio MR, Delord B, Paz JT.		Ritter-Makinson S	Cell Rep	2019	PMC6557138	NIHMS1519375	10.1016/j.celrep.2019.01.037
33850219	Author Correction: Epilepsy and neuropsychiatric comorbidities in mice carrying a recurrent Dravet syndrome SCN1A missense mutation	Ricobaraza A, Mora-Jimenez L, Puerta E, Sanchez-Carpintero R, Mingorance A, Artieda J, Nicolas MJ, Besne G, Bunuales M, Gonzalez-Aparicio M, Sola-Sevilla N, Valencia M, Hernandez-Alcoceba R.		Ricobaraza A	Sci Rep	2021	PMC8044099		10.1038/s41598-021-87092-3
23504253	Authors' response to correspondence on "mesial temporal sclerosis in a cohort of children with SCN1A gene mutation"	Van Poppel K, Patay Z, Roberts D, Clarke D, McGregor A, Perkins FF, Wheless J.		Van Poppel K	J Child Neurol	2013			10.1177/0883073812473509
15605469	Autism in several members of a family with generalized epilepsy with febrile seizures plus	Dixon-Salazar TJ, Keeler LC, Trauner DA, Gleeson JG.		Dixon-Salazar TJ	J Child Neurol	2004			10.1177/088307380401900806
22914087	Autistic-like behaviour in Scn1a+/- mice and rescue by enhanced GABA-mediated neurotransmission	Han S, Tai C, Westenbroek RE, Yu FH, Cheah CS, Potter GB, Rubenstein JL, Scheuer T, de la Iglesia HO, Catterall WA.		Han S	Nature	2012	PMC3448848	NIHMS389654	10.1038/nature11356
11823106	Autosomal dominant epilepsy with febrile seizures plus with missense mutations of the (Na+)-channel alpha 1 subunit gene, SCN1A	Ito M, Nagafuji H, Okazawa H, Yamakawa K, Sugawara T, Mazaki-Miyazaki E, Hirose S, Fukuma G, Mitsudome A, Wada K, Kaneko S.		Ito M	Epilepsy Res	2002			10.1016/s0920-1211(01)00313-8
17576410	BACE1 regulates voltage-gated sodium channels and neuronal activity	Kim DY, Carey BW, Wang H, Ingano LA, Binshtok AM, Wertz MH, Pettingell WH, He P, Lee VM, Woolf CJ, Kovacs DM.		Kim DY	Nat Cell Biol	2007	PMC2747787	NIHMS125188	10.1038/ncb1602
29728980	Backbone resonance assignments of complexes of apo human calmodulin bound to IQ motif peptides of voltage-dependent sodium channels Na(V)1.1, Na(V)1.4 and Na(V)1.7	Isbell HM, Kilpatrick AM, Lin Z, Mahling R, Shea MA.		Isbell HM	Biomol NMR Assign	2018	PMC6274588	NIHMS995948	10.1007/s12104-018-9824-5
18294202	Balanced translocation in a patient with severe myoclonic epilepsy of infancy disrupts the sodium channel gene SCN1A	M?ller RS, Schneider LM, Hansen CP, Bugge M, Ullmann R, Tommerup N, T¨¹mer Z.		M?ller RS	Epilepsia	2008			10.1111/j.1528-1167.2008.01550.x
26559170	Barriers to the use of genetic information for the development of new epilepsy treatments	Ferraro TN.		Ferraro TN	Expert Rev Neurother	2016			10.1586/14737175.2016.1115718
30578097	Behavior problems and health-related quality of life in Dravet syndrome	Sinoo C, de Lange IM, Westers P, Gunning WB, Jongmans MJ, Brilstra EH.		Sinoo C	Epilepsy Behav	2019			10.1016/j.yebeh.2018.11.029
28812061	Behavioral Comorbidities and Drug Treatments in a Zebrafish scn1lab Model of Dravet Syndrome	Grone BP, Qu T, Baraban SC.		Grone BP	eNeuro	2017	PMC5555352		10.1523/ENEURO.0066-17.2017
25838126	Benchmarking the stability of human detergent-solubilised voltage-gated sodium channels for structural studies using eel as a reference	Slowik D, Henderson R.		Slowik D	Biochim Biophys Acta	2015	PMC4557063		10.1016/j.bbamem.2015.03.021
20519669	Benign convulsions with mild gastroenteritis: is it associated with sodium channel gene SCN1A mutation?	Weng WC, Hirose S, Lee WT.		Weng WC	J Child Neurol	2010			10.1177/0883073810370898
31257984	Beyond Dravet Syndrome: Characterization of a Novel, More Severe SCN1A-Linked Epileptic Encephalopathy	Beck VC, Hull JM, Isom LL.		Beck VC	Epilepsy Curr	2019	PMC6891832		10.1177/1535759719858339
32090326	Biological concepts in human sodium channel epilepsies and their relevance in clinical practice	Brunklaus A, Du J, Steckler F, Ghanty II, Johannesen KM, Fenger CD, Schorge S, Baez-Nieto D, Wang HR, Allen A, Pan JQ, Lerche H, Heyne H, Symonds JD, Zuberi SM, Sanders S, Sheidley BR, Craiu D, Olson HE, Weckhuysen S, DeJonge P, Helbig I, Van Esch H, Busa T, Milh M, Isidor B, Depienne C, Poduri A, Campbell AJ, Dimidschstein J, M?ller RS, Lal D.		Brunklaus A	Epilepsia	2020			10.1111/epi.16438
21463273	Borderline Dravet syndrome: a useful diagnostic category?	Guerrini R, Oguni H.		Guerrini R	Epilepsia	2011			10.1111/j.1528-1167.2011.02995.x
25048308	Brain morphometry of Dravet syndrome	P¨¦rez A, Garc¨ªa-Pent¨®n L, Canales-Rodr¨ªguez EJ, Lerma-Usabiaga G, Iturria-Medina Y, Rom¨¢n FJ, Davidson D, Alem¨¢n-G¨®mez Y, Acha J, Carreiras M.		P¨¦rez A	Epilepsy Res	2014			10.1016/j.eplepsyres.2014.06.006
17381446	Brain MRI findings in severe myoclonic epilepsy in infancy and genotype-phenotype correlations	Striano P, Mancardi MM, Biancheri R, Madia F, Gennaro E, Paravidino R, Beccaria F, Capovilla G, Dalla Bernardina B, Darra F, Elia M, Giordano L, Gobbi G, Granata T, Ragona F, Guerrini R, Marini C, Mei D, Longaretti F, Romeo A, Siri L, Specchio N, Vigevano F, Striano S, Tortora F, Rossi A, Minetti C, Dravet C, Gaggero R, Zara F.		Striano P	Epilepsia	2007			10.1111/j.1528-1167.2007.01020.x
24257433	Broad phenotypic heterogeneity due to a novel SCN1A mutation in a family with genetic epilepsy with febrile seizures plus	Goldberg-Stern H, Aharoni S, Afawi Z, Bennett O, Appenzeller S, Pendziwiat M, Kuhlenb?umer G, Basel-Vanagaite L, Shuper A, Korczyn AD, Helbig I.		Goldberg-Stern H	J Child Neurol	2014			10.1177/0883073813509016
22430156	Bromide in patients with SCN1A-mutations manifesting as Dravet syndrome	Lotte J, Haberlandt E, Neubauer B, Staudt M, Kluger GJ.		Lotte J	Neuropediatrics	2012			10.1055/s-0032-1307454
30868126	C57BL/6J and C57BL/6N substrains differentially influence phenotype severity in the Scn1a (+/-) mouse model of Dravet syndrome	Kang SK, Hawkins NA, Kearney JA.		Kang SK	Epilepsia Open	2018	PMC6398090		10.1002/epi4.12287
31601780	Ca(2+)-dependent recruitment of voltage-gated sodium channels underlies bilirubin-induced overexcitation and neurotoxicity	Shi HS, Lai K, Yin XL, Liang M, Ye HB, Shi HB, Wang LY, Yin SK.		Shi HS	Cell Death Dis	2019	PMC6787254		10.1038/s41419-019-1979-1
23103419	CACNA1A variants may modify the epileptic phenotype of Dravet syndrome	Ohmori I, Ouchida M, Kobayashi K, Jitsumori Y, Mori A, Michiue H, Nishiki T, Ohtsuka Y, Matsui H.		Ohmori I	Neurobiol Dis	2013			10.1016/j.nbd.2012.10.016
34135856	CACNA1A-Linked Hemiplegic Migraine in GLUT 1 Deficiency Syndrome: A Case Report	Scoppola C, Magli G, Conti M, Fadda M, Luzzu GM, Simula DM, Carta A, Sotgiu S, Casellato S.		Scoppola C	Front Neurol	2021	PMC8200771		10.3389/fneur.2021.679354
34320921	CACNA1A-p.Thr501Met mutation associated with familial hemiplegic migraine: a family report	Romozzi M, Primiano G, Rollo E, Travaglini L, Calabresi P, Servidei S, Vollono C.		Romozzi M	J Headache Pain	2021	PMC8317284		10.1186/s10194-021-01297-5
28556246	Cacna1g is a genetic modifier of epilepsy in a mouse model of Dravet syndrome	Calhoun JD, Hawkins NA, Zachwieja NJ, Kearney JA.		Calhoun JD	Epilepsia	2017	PMC5554089	NIHMS875699	10.1111/epi.13811
21726526	Calmodulin and calcium differentially regulate the neuronal Nav1.1 voltage-dependent sodium channel	Gaudioso C, Carlier E, Youssouf F, Clare JJ, Debanne D, Alcaraz G.		Gaudioso C	Biochem Biophys Res Commun	2011			10.1016/j.bbrc.2011.06.142
27656030	Calpain Activation in Alzheimer's Model Mice Is an Artifact of APP and Presenilin Overexpression	Saito T, Matsuba Y, Yamazaki N, Hashimoto S, Saido TC.		Saito T	J Neurosci	2016	PMC5030353		10.1523/JNEUROSCI.1907-16.2016
18251842	Can SCN1A mutations account for SUDEP?--Commentary on Hindocha et al	Nabbout R.		Nabbout R	Epilepsia	2008			10.1111/j.1528-1167.2007.01439_5.x
29692967	Can the combination of hyperthermia, seizures and ion channel dysfunction cause fatal post-ictal cerebral edema in patients with SCN1A mutations?	B¨¹ren C, Kamp MA, Munoz-Bendix C, Steiger HJ, Windolf J, Dibu¨¦-Adjei M.		B¨¹ren C	Epilepsy Behav Case Rep	2017	PMC5913039		10.1016/j.ebcr.2017.12.003
33395525	Cannabichromene, Related Phytocannabinoids, and 5-Fluoro-cannabichromene Have Anticonvulsant Properties in a Mouse Model of Dravet Syndrome	Anderson LL, Ametovski A, Lin Luo J, Everett-Morgan D, McGregor IS, Banister SD, Arnold JC.		Anderson LL	ACS Chem Neurosci	2021			10.1021/acschemneuro.0c00677
28973916	Cannabidiol attenuates seizures and social deficits in a mouse model of Dravet syndrome	Kaplan JS, Stella N, Catterall WA, Westenbroek RE.		Kaplan JS	Proc Natl Acad Sci U S A	2017	PMC5651774		10.1073/pnas.1711351114
32321192	Cannabidiol improves survival and behavioural co-morbidities of Dravet syndrome in mice	Patra PH, Serafeimidou-Pouliou E, Bazelot M, Whalley BJ, Williams CM, McNeish AJ.		Patra PH	Br J Pharmacol	2020	PMC7236080		10.1111/bph.15003
34384142	Cannabigerolic acid, a major biosynthetic precursor molecule in cannabis, exhibits divergent effects on seizures in mouse models of epilepsy	Anderson LL, Heblinski M, Absalom NL, Hawkins NA, Bowen MT, Benson MJ, Zhang F, Bahceci D, Doohan PT, Chebib M, McGregor IS, Kearney JA, Arnold JC.		Anderson LL	Br J Pharmacol	2021			10.1111/bph.15661
32585475	Cannabis constituents reduce seizure behavior in chemically-induced and scn1a-mutant zebrafish	Thornton C, Dickson KE, Carty DR, Ashpole NM, Willett KL.		Thornton C	Epilepsy Behav	2020	PMC8276876	NIHMS1717219	10.1016/j.yebeh.2020.107152
26076853	Carbamazepine and oxcarbazepine in adult patients with Dravet syndrome: Friend or foe?	Snoeijen-Schouwenaars FM, Veendrick MJ, van Mierlo P, van Erp G, de Louw AJ, Kleine BU, Schelhaas HJ, Tan IY.		Snoeijen-Schouwenaars FM	Seizure	2015			10.1016/j.seizure.2015.03.010
18251840	Cardiac arrhythmias and SUDEP--Commentary on Hindocha et al	Cooper PN.		Cooper PN	Epilepsia	2008			10.1111/j.1528-1167.2007.01439_4.x
32207228	Cardiac arrhythmias in Dravet syndrome: an observational multicenter study	Shmuely S, Surges R, Helling RM, Gunning WB, Brilstra EH, Verhoeven JS, Cross JH, Sisodiya SM, Tan HL, Sander JW, Thijs RD.		Shmuely S	Ann Clin Transl Neurol	2020	PMC7187713		10.1002/acn3.51017
31533007	Case studies in neuroscience: a novel amino acid duplication in the NH(2)-terminus of the brain sodium channel Na(V)1.1 underlying Dravet syndrome	Angus M, Peters CH, Poburko D, Brimble E, Spelbrink EM, Ruben PC.		Angus M	J Neurophysiol	2019	PMC6879963		10.1152/jn.00491.2019
24337656	Case-control association study of polymorphisms in the voltage-gated sodium channel genes SCN1A, SCN2A, SCN3A, SCN1B, and SCN2B and epilepsy	Baum L, Haerian BS, Ng HK, Wong VC, Ng PW, Lui CH, Sin NC, Zhang C, Tomlinson B, Wong GW, Tan HJ, Raymond AA, Mohamed Z, Kwan P.		Baum L	Hum Genet	2014			10.1007/s00439-013-1405-1
32276107	Case-control association study of rare nonsynonymous variants of SCN1A and KCNQ2 in acute encephalopathy with biphasic seizures and late reduced diffusion	Shibata A, Kasai M, Terashima H, Hoshino A, Miyagawa T, Kikuchi K, Ishii A, Matsumoto H, Kubota M, Hirose S, Oka A, Mizuguchi M.		Shibata A	J Neurol Sci	2020			10.1016/j.jns.2020.116808
19734009	CDKL5 and ARX mutations are not responsible for early onset severe myoclonic epilepsy in infancy	Nabbout R, Depienne C, Chipaux M, Girard B, Souville I, Trouillard O, Dulac O, Chelly J, Afenjar A, H¨¦ron D, Leguern E, Beldjord C, Bienvenu T, Bahi-Buisson N.		Nabbout R	Epilepsy Res	2009			10.1016/j.eplepsyres.2009.07.004
19118165	Cell-type-dependent molecular composition of the axon initial segment	Lorincz A, Nusser Z.		Lorincz A	J Neurosci	2008	PMC2628579	UKMS3558	10.1523/JNEUROSCI.4833-08.2008
32144139	Central neurogenetic signatures of the visuomotor integration system	Bueichek¨² E, Azn¨¢rez-Sanado M, Diez I, d'Oleire Uquillas F, Ortiz-Ter¨¢n L, Qureshi AY, Su?ol M, Basaia S, Ortiz-Ter¨¢n E, Pastor MA, Sepulcre J.		Bueichek¨² E	Proc Natl Acad Sci U S A	2020	PMC7104395		10.1073/pnas.1912429117
32079034	Changing Landscape of Dravet Syndrome Management: An Overview	Samanta D.		Samanta D	Neuropediatrics	2020			10.1055/s-0040-1701694
12644745	Channelopathies as a genetic cause of epilepsy	Mulley JC, Scheffer IE, Petrou S, Berkovic SF.		Mulley JC	Curr Opin Neurol	2003			10.1097/01.wco.0000063767.15877.c7
11888238	Channelopathies can cause epilepsy in man	Steinlein OK.		Steinlein OK	Eur J Pain	2002			10.1053/eujp.2001.0319
30146492	Channelopathy as a SUDEP Biomarker in Dravet Syndrome Patient-Derived Cardiac Myocytes	Frasier CR, Zhang H, Offord J, Dang LT, Auerbach DS, Shi H, Chen C, Goldman AM, Eckhardt LL, Bezzerides VJ, Parent JM, Isom LL.		Frasier CR	Stem Cell Reports	2018	PMC6135724		10.1016/j.stemcr.2018.07.012
17544618	Characterization of 5' untranslated regions of the voltage-gated sodium channels SCN1A, SCN2A, and SCN3A and identification of cis-conserved noncoding sequences	Martin MS, Tang B, Ta N, Escayg A.		Martin MS	Genomics	2007	PMC2637551	NIHMS27601	10.1016/j.ygeno.2007.04.006
26542295	Characterization of maturation of neuronal voltage-gated sodium channels SCN1A and SCN8A in rat myocardium	Krause U, Alflen C, Steinmetz M, M¨¹ller MJ, Quentin T, Paul T.		Krause U	Mol Cell Pediatr	2015	PMC4530575		10.1186/s40348-015-0015-5
19786689	Child Neurology: Dravet syndrome: when to suspect the diagnosis	Millichap JJ, Koh S, Laux LC, Nordli DR Jr.		Millichap JJ	Neurology	2009	PMC2754329		10.1212/WNL.0b013e3181b9c880
29522854	Chronic Amyloid ¦Â Oligomer Infusion Evokes Sustained Inflammation and Microglial Changes in the Rat Hippocampus via NLRP3	Fekete C, Vastagh C, D¨¦nes ¨¢, Hrabovszky E, Nyiri G, Kall¨® I, Liposits Z, S¨¢rv¨¢ri M.		Fekete C	Neuroscience	2019			10.1016/j.neuroscience.2018.02.046
31346614	Circadian regulation of sleep in a pre-clinical model of Dravet syndrome: dynamics of sleep stage and siesta re-entrainment	Sanchez REA, Bussi IL, Ben-Hamo M, Caldart CS, Catterall WA, De La Iglesia HO.		Sanchez REA	Sleep	2019	PMC7182667		10.1093/sleep/zsz173
26974309	Cleavage of Na(+) channels by calpain increases persistent Na(+) current and promotes spasticity after spinal cord injury	Brocard C, Plantier V, Boulenguez P, Liabeuf S, Bouhadfane M, Viallat-Lieutaud A, Vinay L, Brocard F.		Brocard C	Nat Med	2016			10.1038/nm.4061
28073790	Clemizole and modulators of serotonin signalling suppress seizures in Dravet syndrome	Griffin A, Hamling KR, Knupp K, Hong S, Lee LP, Baraban SC.		Griffin A	Brain	2017	PMC6075536		10.1093/brain/aww342
27155821	Clinical and electroencephalographic abnormalities during the full duration of a sporadic hemiplegic migraine attack	Chastan N, Lebas A, Legoff F, Parain D, Guyant-Marechal L.		Chastan N	Neurophysiol Clin	2016			10.1016/j.neucli.2016.03.004
24996492	Clinical and genetic analysis in alternating hemiplegia of childhood: ten new patients from Southern Europe	Vila-Pueyo M, Pons R, Raspall-Chaure M, Marc¨¦-Grau A, Carre?o O, Sintas C, Cormand B, Pineda-Marf¨¤ M, Macaya A.		Vila-Pueyo M	J Neurol Sci	2014			10.1016/j.jns.2014.06.014
12060016	Clinical and genetic analysis of a new multigenerational pedigree with GEFS+ (Generalized Epilepsy with Febrile Seizures Plus)	G¨¦rard F, Pereira S, Robaglia-Schlupp A, Genton P, Szepetowski P.		G¨¦rard F	Epilepsia	2002			10.1046/j.1528-1157.2002.43001.x
31729702	Clinical and genetic aspect of 30 tunisian families with febrile seizures	Kamoun Feki F, Fendri Kriaa N, Kolsi D, Rabai A, Fakhfakh F, Charfi Triki C.		Kamoun Feki F	Tunis Med	2019
34020146	Clinical and genetic characteristics of epilepsy of infancy with migrating focal seizures in Chinese children	Fang ZX, Xie LL, Yan LS, Lin H, Pan YN, Liu BK, Jiang Y, Cheng M, Li XJ, Jiang L.		Fang ZX	Epilepsy Res	2021			10.1016/j.eplepsyres.2021.106669
32913952	Clinical and genetic characteristics of patients with Doose syndrome	Hinokuma N, Nakashima M, Asai H, Nakamura K, Akaboshi S, Fukuoka M, Togawa M, Oana S, Ohno K, Kasai M, Ogawa C, Yamamoto K, Okumiya K, Chong PF, Kira R, Uchino S, Fukuyama T, Shinagawa T, Miyata Y, Abe Y, Hojo A, Kobayashi K, Maegaki Y, Ishikawa N, Ikeda H, Amamoto M, Mizuguchi T, Iwama K, Itai T, Miyatake S, Saitsu H, Matsumoto N, Kato M.		Hinokuma N	Epilepsia Open	2020	PMC7469791		10.1002/epi4.12417
28202706	Clinical and genetic factors predicting Dravet syndrome in infants with SCN1A mutations	Cetica V, Chiari S, Mei D, Parrini E, Grisotto L, Marini C, Pucatti D, Ferrari A, Sicca F, Specchio N, Trivisano M, Battaglia D, Contaldo I, Zamponi N, Petrelli C, Granata T, Ragona F, Avanzini G, Guerrini R.		Cetica V	Neurology	2017	PMC5384833		10.1212/WNL.0000000000003716
19200853	Clinical and genetic familial study of a large cohort of Italian children with idiopathic epilepsy	Combi R, Grioni D, Contri M, Redaelli S, Redaelli F, Bassi MT, Barisani D, Lavitrano ML, Tredici G, Tenchini ML, Bertolini M, Dalpr¨¤ L.		Combi R	Brain Res Bull	2009			10.1016/j.brainresbull.2009.01.008
25156649	Clinical and genetic features of acute encephalopathy in children taking theophylline	Saitoh M, Shinohara M, Ishii A, Ihara Y, Hirose S, Shiomi M, Kawawaki H, Kubota M, Yamagata T, Miyamoto A, Yamanaka G, Amemiya K, Kikuchi K, Kamei A, Akasaka M, Anzai Y, Mizuguchi M.		Saitoh M	Brain Dev	2015			10.1016/j.braindev.2014.07.010
29948376	Clinical and genetic study of Tunisian families with genetic generalized epilepsy: contribution of CACNA1H and MAST4 genes	Landoulsi Z, Laatar F, No¨¦ E, Mrabet S, Ben Djebara M, Achaz G, Nava C, Baulac S, Kacem I, Gargouri-Berrechid A, Gouider R, Leguern E.		Landoulsi Z	Neurogenetics	2018			10.1007/s10048-018-0550-z
26339958	Clinical and histopathological outcomes in patients with SCN1A mutations undergoing surgery for epilepsy	Skjei KL, Church EW, Harding BN, Santi M, Holland-Bouley KD, Clancy RR, Porter BE, Heuer GG, Marsh ED.		Skjei KL	J Neurosurg Pediatr	2015			10.3171/2015.5.PEDS14551
30558019	Clinical and molecular analysis of epilepsy-related genes in patients with Dravet syndrome	Jiang T, Shen Y, Chen H, Yuan Z, Mao S, Gao F.		Jiang T	Medicine (Baltimore)	2018	PMC6320057		10.1097/MD.0000000000013565
31487502	Clinical Application of Targeted Next-Generation Sequencing Panels and Whole Exome Sequencing in Childhood Epilepsy	Costain G, Cordeiro D, Matviychuk D, Mercimek-Andrews S.		Costain G	Neuroscience	2019			10.1016/j.neuroscience.2019.08.016
15087100	Clinical correlations of mutations in the SCN1A gene: from febrile seizures to severe myoclonic epilepsy in infancy	Ceulemans BP, Claes LR, Lagae LG.		Ceulemans BP	Pediatr Neurol	2004			10.1016/j.pediatrneurol.2003.10.012
19666878	Clinical evaluation and diagnosis of severe epilepsy syndromes of early childhood	Zupanc ML.		Zupanc ML	J Child Neurol	2009			10.1177/0883073809338151
32005694	Clinical exome sequencing as the first-tier test for diagnosing developmental disorders covering both CNV and SNV: a Chinese cohort	Dong X, Liu B, Yang L, Wang H, Wu B, Liu R, Chen H, Chen X, Yu S, Chen B, Wang S, Xu X, Zhou W, Lu Y.		Dong X	J Med Genet	2020	PMC7418612		10.1136/jmedgenet-2019-106377
31439038	Clinical exome sequencing identifies two novel mutations of the SCN1A and SCN2A genes in Moroccan patients with epilepsy: a case series	Sahli M, Zrhidri A, Elaloui SC, Smaili W, Lyahyai J, Oudghiri FZ, Sefiani A.		Sahli M	J Med Case Rep	2019	PMC6706917		10.1186/s13256-019-2203-8
28012175	Clinical implications of SCN1A missense and truncation variants in a large Japanese cohort with Dravet syndrome	Ishii A, Watkins JC, Chen D, Hirose S, Hammer MF.		Ishii A	Epilepsia	2017			10.1111/epi.13639
34673242	Clinical next generation sequencing in developmental and epileptic encephalopathies: Diagnostic relevance of data re-analysis and variants re-interpretation	Salinas V, Mart¨ªnez N, Maturo JP, Rodriguez-Quiroga SA, Zavala L, Medina N, Amartino H, Sfaello I, Agosta G, Seraf¨ªn EM, Mor¨®n DG, Kauffman MA, Vega P.		Salinas V	Eur J Med Genet	2021			10.1016/j.ejmg.2021.104363
29804481	Clinical reappraisal of the influence of drug-transporter polymorphisms in epilepsy	Orlandi A, Paolino MC, Striano P, Parisi P.		Orlandi A	Expert Opin Drug Metab Toxicol	2018			10.1080/17425255.2018.1473377
29343472	Clinical spectrum of hemiplegic migraine and chances of finding a pathogenic mutation	Pelzer N, Haan J, Stam AH, Vijfhuizen LS, Koelewijn SC, Smagge A, de Vries B, Ferrari MD, van den Maagdenberg AMJM, Terwindt GM.		Pelzer N	Neurology	2018			10.1212/WNL.0000000000004966
16806826	Clinical spectrum of mutations in SCN1A gene: severe myoclonic epilepsy in infancy and related epilepsies	Fujiwara T.		Fujiwara T	Epilepsy Res	2006			10.1016/j.eplepsyres.2006.01.019
19469841	Clinical spectrum of SCN1A mutations	Gambardella A, Marini C.		Gambardella A	Epilepsia	2009			10.1111/j.1528-1167.2009.02115.x
22029951	Clinical spectrum of SCN2A mutations	Shi X, Yasumoto S, Kurahashi H, Nakagawa E, Fukasawa T, Uchiya S, Hirose S.		Shi X	Brain Dev	2012			10.1016/j.braindev.2011.09.016
30737342	Clinical spectrum of STX1B-related epileptic disorders	Wolking S, May P, Mei D, M?ller RS, Balestrini S, Helbig KL, Altuzarra CD, Chatron N, Kaiwar C, St?hr K, Widdess-Walsh P, Mendelsohn BA, Numis A, Cilio MR, Van Paesschen W, Svendsen LL, Oates S, Hughes E, Goyal S, Brown K, Sifuentes Saenz M, Dorn T, Muhle H, Pagnamenta AT, Vavoulis DV, Knight SJL, Taylor JC, Canevini MP, Darra F, Gavrilova RH, Powis Z, Tang S, Marquetand J, Armstrong M, McHale D,…		Wolking S	Neurology	2019	PMC6511102		10.1212/WNL.0000000000007089
31273778	Clinical utility of multigene panel testing in adults with epilepsy and intellectual disability	Borlot F, de Almeida BI, Combe SL, Andrade DM, Filloux FM, Myers KA.		Borlot F	Epilepsia	2019			10.1111/epi.16273
34324871	Clonazepam attenuates neurobehavioral abnormalities in offspring exposed to maternal immune activation by enhancing GABAergic neurotransmission	Yang Y, Wang B, Zhong Z, Chen H, Ding W, Hoi MPM.		Yang Y	Biochem Pharmacol	2021			10.1016/j.bcp.2021.114711
31625159	Coadministered cannabidiol and clobazam: Preclinical evidence for both pharmacodynamic and pharmacokinetic interactions	Anderson LL, Absalom NL, Abelev SV, Low IK, Doohan PT, Martin LJ, Chebib M, McGregor IS, Arnold JC.		Anderson LL	Epilepsia	2019	PMC6900043		10.1111/epi.16355
24412860	Cognitive and adaptive evaluation of 21 consecutive patients with Dravet syndrome	Villeneuve N, Laguitton V, Viellard M, L¨¦pine A, Chabrol B, Dravet C, Milh M.		Villeneuve N	Epilepsy Behav	2014			10.1016/j.yebeh.2013.11.021
23642572	Cognitive decline in Dravet syndrome: is there a cerebellar role?	Battaglia D, Chieffo D, Siracusano R, Waure Cd, Brogna C, Ranalli D, Contaldo I, Tortorella G, Dravet C, Mercuri E, Guzzetta F.		Battaglia D	Epilepsy Res	2013			10.1016/j.eplepsyres.2013.03.012
26978272	Cognitive Deficits Associated with Nav1.1 Alterations: Involvement of Neuronal Firing Dynamics and Oscillations	Bender AC, Luikart BW, Lenck-Santini PP.		Bender AC	PLoS One	2016	PMC4792481		10.1371/journal.pone.0151538
21463278	Cognitive development in children with Dravet syndrome	Ragona F.		Ragona F	Epilepsia	2011			10.1111/j.1528-1167.2011.03000.x
21269283	Cognitive development in Dravet syndrome: a retrospective, multicenter study of 26 patients	Ragona F, Granata T, Dalla Bernardina B, Offredi F, Darra F, Battaglia D, Morbi M, Brazzo D, Cappelletti S, Chieffo D, De Giorgi I, Fontana E, Freri E, Marini C, Toraldo A, Specchio N, Veggiotti P, Vigevano F, Guerrini R, Guzzetta F, Dravet C.		Ragona F	Epilepsia	2011			10.1111/j.1528-1167.2010.02925.x
32858363	Cognitive, behavioral, and social functioning in children and adults with Dravet syndrome	Brown A, Arpone M, Schneider AL, Micallef S, Anderson VA, Scheffer IE.		Brown A	Epilepsy Behav	2020			10.1016/j.yebeh.2020.107319
28442529	Coinheritance of Novel Mutations in SCN1A Causing GEFS+ and in KDM6A Causing Kabuki Syndrome in a Family	Kim J, Lee CG.		Kim J	Ann Clin Lab Sci	2017
14978247	Combinatorial interaction of scorpion toxins Lqh-2, Lqh-3, and LqhalphaIT with sodium channel receptor sites-3	Leipold E, Lu S, Gordon D, Hansel A, Heinemann SH.		Leipold E	Mol Pharmacol	2004			10.1124/mol.65.3.685
34308420	Combined Antiseizure Efficacy of Cannabidiol and Clonazepam in a Conditional Mouse Model of Dravet Syndrome	Chuang SH, Westenbroek RE, Stella N, Catterall WA.		Chuang SH	J Exp Neurol	2021	PMC8301289	NIHMS1716568	10.33696/neurol.2.040
24623837	Comment: Dravet syndrome--"old gene," novel mechanism	Xu M.		Xu M	Neurology	2014			10.1212/WNL.0000000000000300
25344690	Common variants associated with general and MMR vaccine-related febrile seizures	Feenstra B, Pasternak B, Geller F, Carstensen L, Wang T, Huang F, Eitson JL, Hollegaard MV, Svanstr?m H, Vestergaard M, Hougaard DM, Schoggins JW, Jan LY, Melbye M, Hviid A.		Feenstra B	Nat Genet	2014	PMC4244308	NIHMS633400	10.1038/ng.3129
21668444	Comorbidities and predictors of health-related quality of life in Dravet syndrome	Brunklaus A, Dorris L, Zuberi SM.		Brunklaus A	Epilepsia	2011			10.1111/j.1528-1167.2011.03129.x
34368859	Comparative analysis of the autism?related variants between different autistic children in a family pedigree	Shen L, Li P, Zheng T, Luo M, Zhang S, Huang Y, Hu Y, Li H.		Shen L	Mol Med Rep	2021	PMC8365409		10.3892/mmr.2021.12336
33712547	Comparative structural analysis of human Na(v)1.1 and Na(v)1.5 reveals mutational hotspots for sodium channelopathies	Pan X, Li Z, Jin X, Zhao Y, Huang G, Huang X, Shen Z, Cao Y, Dong M, Lei J, Yan N.		Pan X	Proc Natl Acad Sci U S A	2021	PMC7980448		10.1073/pnas.2100066118
21303679	Comparative study of voltage-gated sodium channel ¦Á-subunits in non-overlapping four neuronal populations in the rat dorsal root ganglion	Fukuoka T, Noguchi K.		Fukuoka T	Neurosci Res	2011			10.1016/j.neures.2011.01.020
28518218	Comparison and optimization of in silico algorithms for predicting the pathogenicity of sodium channel variants in epilepsy	Holland KD, Bouley TM, Horn PS.		Holland KD	Epilepsia	2017	PMC5505324	NIHMS870570	10.1111/epi.13798
31786370	Comparisons of dual isogenic human iPSC pairs identify functional alterations directly caused by an epilepsy associated SCN1A mutation	Xie Y, Ng NN, Safrina OS, Ramos CM, Ess KC, Schwartz PH, Smith MA, O'Dowd DK.		Xie Y	Neurobiol Dis	2020			10.1016/j.nbd.2019.104627
22292851	Comprehensive analysis of the association of SCN1A gene polymorphisms with the retention rate of carbamazepine following monotherapy for new-onset focal seizures in the Chinese Han population	Zhou BT, Zhou QH, Yin JY, Li GL, Xu XJ, Qu J, Liu D, Zhou HH, Liu ZQ.		Zhou BT	Clin Exp Pharmacol Physiol	2012			10.1111/j.1440-1681.2012.05680.x
33126486	Comprehensive Exonic Sequencing of Hemiplegic Migraine-Related Genes in a Cohort of Suspected Probands Identifies Known and Potential Pathogenic Variants	Sutherland HG, Maksemous N, Albury CL, Ibrahim O, Smith RA, Lea RA, Haupt LM, Jenkins B, Tsang B, Griffiths LR.		Sutherland HG	Cells	2020	PMC7693486		10.3390/cells9112368
22471526	Confirmation of an epilepsy modifier locus on mouse chromosome 11 and candidate gene analysis by RNA-Seq	Hawkins NA, Kearney JA.		Hawkins NA	Genes Brain Behav	2012	PMC3370141	NIHMS367890	10.1111/j.1601-183X.2012.00790.x
24659627	Confirming an expanded spectrum of SCN2A mutations: a case series	Matalon D, Goldberg E, Medne L, Marsh ED.		Matalon D	Epileptic Disord	2014			10.1684/epd.2014.0641
28007400	Consequences of acute Na(v)1.1 exposure to deltamethrin	James TF, Nenov MN, Tapia CM, Lecchi M, Koshy S, Green TA, Laezza F.		James TF	Neurotoxicology	2017	PMC5447465	NIHMS839043	10.1016/j.neuro.2016.12.005
28621020	Conservation of alternative splicing in sodium channels reveals evolutionary focus on release from inactivation and structural insights into gating	Liavas A, Lignani G, Schorge S.		Liavas A	J Physiol	2017	PMC5811987		10.1113/JP274693
32865826	Convulsive seizures and some behavioral comorbidities are uncoupled in the Scn1a(A1783V) Dravet syndrome mouse model	Fadila S, Quinn S, Turchetti Maia A, Yakubovich D, Ovadia M, Anderson KL, Giladi M, Rubinstein M.		Fadila S	Epilepsia	2020			10.1111/epi.16662
24902755	Co-occurring malformations of cortical development and SCN1A gene mutations	Barba C, Parrini E, Coras R, Galuppi A, Craiu D, Kluger G, Parmeggiani A, Pieper T, Schmitt-Mechelke T, Striano P, Giordano F, Blumcke I, Guerrini R.		Barba C	Epilepsia	2014			10.1111/epi.12658
32595013	Copy number variation in genetic epilepsy with febrile seizures plus	Fortin O, Vincelette C, Ch¨¦nier S, Ghais A, Shevell MI, Simard-Tremblay E, Myers KA.		Fortin O	Eur J Paediatr Neurol	2020			10.1016/j.ejpn.2020.05.005
33170338	Correction to: Genes associated with survival of female bovine blastocysts produced in vivo	Zolini AM, Block J, Rabaglino MB, Rincon G, Hoelker M, Bromfield JJ, Salilew-Wondim D, Hansen PJ.		Zolini AM	Cell Tissue Res	2020			10.1007/s00441-020-03293-8
23965409	Correlations in timing of sodium channel expression, epilepsy, and sudden death in Dravet syndrome	Cheah CS, Westenbroek RE, Roden WH, Kalume F, Oakley JC, Jansen LA, Catterall WA.		Cheah CS	Channels (Austin)	2013	PMC4042481		10.4161/chan.26023
26122191	Corrigendum: Generation of the SCN1A epilepsy mutation in hiPS cells using the TALEN technique	Chen W, Liu J, Zhang L, Xu H, Guo X, Deng S, Liu L, Yu D, Chen Y, Li Z.		Chen W	Sci Rep	2015	PMC4650690		10.1038/srep11174
20425031	Cortical spreading depression and migraine	Eikermann-Haerter K, Ayata C.		Eikermann-Haerter K	Curr Neurol Neurosci Rep	2010			10.1007/s11910-010-0099-1
33912281	Cou Cou, flying fish and a whole exome please... lessons learned from genetic testing in Barbados	Scantlebury MH, Barrett KT, Jacinto S, Corbin DOC, Kerr M, Khan A.		Scantlebury MH	Pan Afr Med J	2021	PMC8051213		10.11604/pamj.2021.38.111.27969
26731440	CRISPR/Cas9 facilitates investigation of neural circuit disease using human iPSCs: mechanism of epilepsy caused by an SCN1A loss-of-function mutation	Liu J, Gao C, Chen W, Ma W, Li X, Shi Y, Zhang H, Zhang L, Long Y, Xu H, Guo X, Deng S, Yan X, Yu D, Pan G, Chen Y, Lai L, Liao W, Li Z.		Liu J	Transl Psychiatry	2016	PMC5068877		10.1038/tp.2015.203
32445790	CRISPR/dCas9-based Scn1a gene activation in inhibitory neurons ameliorates epileptic and behavioral phenotypes of Dravet syndrome model mice	Yamagata T, Raveau M, Kobayashi K, Miyamoto H, Tatsukawa T, Ogiwara I, Itohara S, Hensch TK, Yamakawa K.		Yamagata T	Neurobiol Dis	2020			10.1016/j.nbd.2020.104954
34406040	CRISPRa-Mediated Upregulation of scn1laa During Early Development Causes Epileptiform Activity and dCas9-Associated Toxicity	Weuring WJ, Dilevska I, Hoekman J, van de Vondervoort J, Koetsier M, van 't Slot RH, Braun KPJ, Koeleman BPC.		Weuring WJ	CRISPR J	2021			10.1089/crispr.2021.0013
23836888	CRMP2 protein SUMOylation modulates NaV1.7 channel trafficking	Dustrude ET, Wilson SM, Ju W, Xiao Y, Khanna R.		Dustrude ET	J Biol Chem	2013	PMC3750134		10.1074/jbc.M113.474924
17030758	Cryptic chromosome deletions involving SCN1A in severe myoclonic epilepsy of infancy	Madia F, Striano P, Gennaro E, Malacarne M, Paravidino R, Biancheri R, Budetta M, Cilio MR, Gaggero R, Pierluigi M, Minetti C, Zara F.		Madia F	Neurology	2006			10.1212/01.wnl.0000238513.70878.54
33460646	Cryptic prokaryotic promoters explain instability of recombinant neuronal sodium channels in bacteria	DeKeyser JM, Thompson CH, George AL Jr.		DeKeyser JM	J Biol Chem	2021	PMC7948969		10.1016/j.jbc.2021.100298
18413471	Cryptogenic epileptic syndromes related to SCN1A: twelve novel mutations identified	Zucca C, Redaelli F, Epifanio R, Zanotta N, Romeo A, Lodi M, Veggiotti P, Airoldi G, Panzeri C, Romaniello R, De Polo G, Bonanni P, Cardinali S, Baschirotto C, Martorell L, Borgatti R, Bresolin N, Bassi MT.		Zucca C	Arch Neurol	2008			10.1001/archneur.65.4.489
19406745	Crystal structure of a fibroblast growth factor homologous factor (FHF) defines a conserved surface on FHFs for binding and modulation of voltage-gated sodium channels	Goetz R, Dover K, Laezza F, Shtraizent N, Huang X, Tchetchik D, Eliseenkova AV, Xu CF, Neubert TA, Ornitz DM, Goldfarb M, Mohammadi M.		Goetz R	J Biol Chem	2009	PMC2719427		10.1074/jbc.M109.001842
30605865	Curcumin's antiepileptic effect, and alterations in Na(v)1.1 and Na(v)1.6 expression in iron-induced epilepsy	Kumar V, Prakash C, Singh R, Sharma D.		Kumar V	Epilepsy Res	2019			10.1016/j.eplepsyres.2018.12.007
30315507	Current Treatment Strategies and Future Treatment Options for Dravet Syndrome	Ziobro J, Eschbach K, Sullivan JE, Knupp KG.		Ziobro J	Curr Treat Options Neurol	2018			10.1007/s11940-018-0537-y
33528079	Customized Targeted Massively Parallel Sequencing Enables More Precisely Diagnosis of Patients with Epilepsy	Atli EI, Atli E, Yalcintepe S, Demir S, Kalkan R, Eker D, Gurkan H.		Atli EI	Intern Med J	2021			10.1111/imj.15219
27538648	Cytokine-related and sodium channel polymorphism as candidate predisposing factors for childhood encephalopathy FIRES/AERRPS	Saitoh M, Kobayashi K, Ohmori I, Tanaka Y, Tanaka K, Inoue T, Horino A, Ohmura K, Kumakura A, Takei Y, Hirabayashi S, Kajimoto M, Uchida T, Yamazaki S, Shiihara T, Kumagai T, Kasai M, Terashima H, Kubota M, Mizuguchi M.		Saitoh M	J Neurol Sci	2016			10.1016/j.jns.2016.07.040
30619928	Data on mutations and Clinical features in SCN1A or SCN2A gene	Kong Y, Yan K, Hu L, Wang M, Dong X, Lu Y, Wu B, Wang H, Yang L, Zhou W.		Kong Y	Data Brief	2018	PMC6314000		10.1016/j.dib.2018.08.122
31607539	dCas9-Based Scn1a Gene Activation Restores Inhibitory Interneuron Excitability and Attenuates Seizures in Dravet Syndrome Mice	Colasante G, Lignani G, Brusco S, Di Berardino C, Carpenter J, Giannelli S, Valassina N, Bido S, Ricci R, Castoldi V, Marenna S, Church T, Massimino L, Morabito G, Benfenati F, Schorge S, Leocani L, Kullmann DM, Broccoli V.		Colasante G	Mol Ther	2020	PMC6952031		10.1016/j.ymthe.2019.08.018
28593511	De novo exonic duplication of ATP1A2 in Italian patient with hemiplegic migraine: a case report	Gagliardi S, Grieco GS, Gualandi F, Caniatti LM, Groppo E, Valente M, Nappi G, Neri M, Cereda C.		Gagliardi S	J Headache Pain	2017	PMC5462664		10.1186/s10194-017-0770-x
25453779	De novo expression of Nav1.7 in injured putative proprioceptive afferents: Multiple tetrodotoxin-sensitive sodium channels are retained in the rat dorsal root after spinal nerve ligation	Fukuoka T, Miyoshi K, Noguchi K.		Fukuoka T	Neuroscience	2015			10.1016/j.neuroscience.2014.10.027
33674996	De novo homozygous variant of the SCN1A gene in a patient with severe Dravet syndrome complicated by acute encephalopathy	Van LTK, Hien HTD, Kieu HTT, Hieu NLT, Vinh LS, Hoa G, Hang DTT.		Van LTK	Neurogenetics	2021			10.1007/s10048-021-00636-7
24207121	De novo loss-of-function mutations in CHD2 cause a fever-sensitive myoclonic epileptic encephalopathy sharing features with Dravet syndrome	Suls A, Jaehn JA, Kecsk¨¦s A, Weber Y, Weckhuysen S, Craiu DC, Siekierska A, Dj¨¦mi¨¦ T, Afrikanova T, Gormley P, von Spiczak S, Kluger G, Iliescu CM, Talvik T, Talvik I, Meral C, Caglayan HS, Giraldez BG, Serratosa J, Lemke JR, Hoffman-Zacharska D, Szczepanik E, Barisic N, Komarek V, Hjalgrim H, M?ller RS, Linnankivi T, Dimova P, Striano P, Zara F, Marini C, Guerrini R, Depienne C, Baulac S, Kuh…		Suls A	Am J Hum Genet	2013	PMC3824114		10.1016/j.ajhg.2013.09.017
20837964	De novo mutations in ATP1A2 and CACNA1A are frequent in early-onset sporadic hemiplegic migraine	Riant F, Ducros A, Ploton C, Barbance C, Depienne C, Tournier-Lasserve E.		Riant F	Neurology	2010			10.1212/WNL.0b013e3181f25e8f
30305042	De novo mutations in SCN1A are associated with classic Rett syndrome: a case report	Henriksen MW, Ravn K, Paus B, von Tetzchner S, Skjeldal OH.		Henriksen MW	BMC Med Genet	2018	PMC6180591		10.1186/s12881-018-0700-z
11359211	De novo mutations in the sodium-channel gene SCN1A cause severe myoclonic epilepsy of infancy	Claes L, Del-Favero J, Ceulemans B, Lagae L, Van Broeckhoven C, De Jonghe P.		Claes L	Am J Hum Genet	2001	PMC1226119		10.1086/320609
32928894	De novo mutations of SCN1A are responsible for arthrogryposis broadening the SCN1A-related phenotypes	Jaber D, Gitiaux C, Blesson S, Marguet F, Buard D, Varela Salgado M, Kaminska A, Saada J, Fallet-Bianco C, Martinovic J, Laquerriere A, Melki J.		Jaber D	J Med Genet	2021			10.1136/jmedgenet-2020-107166
12754708	De novo SCN1A mutations are a major cause of severe myoclonic epilepsy of infancy	Claes L, Ceulemans B, Audenaert D, Smets K, L?fgren A, Del-Favero J, Ala-Mello S, Basel-Vanagaite L, Plecko B, Raskin S, Thiry P, Wolf NI, Van Broeckhoven C, De Jonghe P.		Claes L	Hum Mutat	2003			10.1002/humu.10217
19589774	De novo SCN1A mutations in Dravet syndrome and related epileptic encephalopathies are largely of paternal origin	Heron SE, Scheffer IE, Iona X, Zuberi SM, Birch R, McMahon JM, Bruce CM, Berkovic SF, Mulley JC.		Heron SE	J Med Genet	2010			10.1136/jmg.2008.065912
21753172	De novo SCN1A mutations in migrating partial seizures of infancy	Carranza Rojo D, Hamiwka L, McMahon JM, Dibbens LM, Arsov T, Suls A, St?dberg T, Kelley K, Wirrell E, Appleton B, Mackay M, Freeman JL, Yendle SC, Berkovic SF, Bienvenu T, De Jonghe P, Thorburn DR, Mulley JC, Mefford HC, Scheffer IE.		Carranza Rojo D	Neurology	2011	PMC3140798		10.1212/WNL.0b013e318227046d
28084635	De novo SCN1A pathogenic variants in the GEFS+ spectrum: Not always a familial syndrome	Myers KA, Burgess R, Afawi Z, Damiano JA, Berkovic SF, Hildebrand MS, Scheffer IE.		Myers KA	Epilepsia	2017			10.1111/epi.13649
31054517	De novo SCN1A, SCN8A, and CLCN2 mutations in childhood absence epilepsy	Xie H, Su W, Pei J, Zhang Y, Gao K, Li J, Ma X, Zhang Y, Wu X, Jiang Y.		Xie H	Epilepsy Res	2019			10.1016/j.eplepsyres.2019.04.005
32540801	De novo truncating mutation in SCN1A as a cause of febrile seizures plus (FS+)	Jaimes A, Guerrero-L¨®pez R, Gonz¨¢lez-Gir¨¢ldez B, Serratosa JM.		Jaimes A	Epileptic Disord	2020			10.1684/epd.2020.1167
19087113	Debate: Does genetic information in humans help us treat patients? PRO--genetic information in humans helps us treat patients. CON--genetic information does not help at all	Delgado-Escueta AV, Bourgeois BF.		Delgado-Escueta AV	Epilepsia	2008			10.1111/j.1528-1167.2008.01922.x
34135733	Deciphering in silico the Role of Mutated Na (V) 1.1 Sodium Channels in Enhancing Trigeminal Nociception in Familial Hemiplegic Migraine Type 3	Suleimanova A, Talanov M, van den Maagdenberg AMJM, Giniatullin R.		Suleimanova A	Front Cell Neurosci	2021	PMC8200561		10.3389/fncel.2021.644047
28865303	Defects at the crossroads of GABAergic signaling in generalized genetic epilepsies	Kang JQ.		Kang JQ	Epilepsy Res	2017	PMC6112605	NIHMS984229	10.1016/j.eplepsyres.2017.08.013
34338318	Defining Dravet syndrome: An essential pre-requisite for precision medicine trials	Li W, Schneider AL, Scheffer IE.		Li W	Epilepsia	2021			10.1111/epi.17015
30996233	Delayed maturation of GABAergic signaling in the Scn1a and Scn1b mouse models of Dravet Syndrome	Yuan Y, O'Malley HA, Smaldino MA, Bouza AA, Hull JM, Isom LL.		Yuan Y	Sci Rep	2019	PMC6470170		10.1038/s41598-019-42191-0
33910599	Deletion of a non-canonical regulatory sequence causes loss of Scn1a expression and epileptic phenotypes in mice	Haigh JL, Adhikari A, Copping NA, Stradleigh T, Wade AA, Catta-Preta R, Su-Feher L, Zdilar I, Morse S, Fenton TA, Nguyen A, Quintero D, Agezew S, Sramek M, Kreun EJ, Carter J, Gompers A, Lambert JT, Canales CP, Pennacchio LA, Visel A, Dickel DE, Silverman JL, Nord AS.		Haigh JL	Genome Med	2021	PMC8080386		10.1186/s13073-021-00884-0
18539002	Deletion of the SCN gene cluster on 2q24.4 is associated with severe epilepsy: an array-based genotype-phenotype correlation and a comprehensive review of previously published cases	Davidsson J, Collin A, Olsson ME, Lundgren J, Soller M.		Davidsson J	Epilepsy Res	2008			10.1016/j.eplepsyres.2008.04.018
20506560	Deletions of SCN1A 5' genomic region with promoter activity in Dravet syndrome	Nakayama T, Ogiwara I, Ito K, Kaneda M, Mazaki E, Osaka H, Ohtani H, Inoue Y, Fujiwara T, Uematsu M, Haginoya K, Tsuchiya S, Yamakawa K.		Nakayama T	Hum Mutat	2010			10.1002/humu.21275
22944210	De-novo mutations and genetic variation in the SCN1A gene in Malaysian patients with generalized epilepsy with febrile seizures plus (GEFS+)	Tan EH, Razak SA, Abdullah JM, Mohamed Yusoff AA.		Tan EH	Epilepsy Res	2012			10.1016/j.eplepsyres.2012.08.004
16713920	De-novo mutations of the sodium channel gene SCN1A in alleged vaccine encephalopathy: a retrospective study	Berkovic SF, Harkin L, McMahon JM, Pelekanos JT, Zuberi SM, Wirrell EC, Gill DS, Iona X, Mulley JC, Scheffer IE.		Berkovic SF	Lancet Neurol	2006			10.1016/S1474-4422(06)70446-X
22784462	Detection of a novel mutation in the CACNA1A gene	Stuart S, Roy B, Davies G, Maksemous N, Smith R, Griffiths LR.		Stuart S	Twin Res Hum Genet	2012			10.1375/twin.15.1.120
28525652	Determination of SCN1A genetic variants in Mexican patients with refractory epilepsy and Dravet syndrome	Jim¨¦nez-Arredondo RE, Brambila-Tapia AJL, Mercado-Silva FM, Maga?a-Torres MT, Figuera LE.		Jim¨¦nez-Arredondo RE	Genet Mol Res	2017			10.4238/gmr16029405
26484865	Determination of the Optimal Concentration of Valproic Acid in Patients with Epilepsy: A Population Pharmacokinetic-Pharmacodynamic Analysis	Nakashima H, Oniki K, Nishimura M, Ogusu N, Shimomasuda M, Ono T, Matsuda K, Yasui-Furukori N, Nakagawa K, Ishitsu T, Saruwatari J.		Nakashima H	PLoS One	2015	PMC4617862		10.1371/journal.pone.0141266
32613771	Determining the best candidates for next-generation sequencing-based gene panel for evaluation of early-onset epilepsy	Lee J, Lee C, Ki CS, Lee J.		Lee J	Mol Genet Genomic Med	2020	PMC7507365		10.1002/mgg3.1376
34002394	Development of an antiseizure drug screening platform for Dravet syndrome at the NINDS contract site for the Epilepsy Therapy Screening Program	Pernici CD, Mensah JA, Dahle EJ, Johnson KJ, Handy L, Buxton L, Smith MD, West PJ, Metcalf CS, Wilcox KS.		Pernici CD	Epilepsia	2021	PMC8360068		10.1111/epi.16925
33271326	Developmental alterations in firing properties of hippocampal CA1 inhibitory and excitatory neurons in a mouse model of Dravet syndrome	Almog Y, Fadila S, Brusel M, Mavashov A, Anderson K, Rubinstein M.		Almog Y	Neurobiol Dis	2021			10.1016/j.nbd.2020.105209
34425903	Developmental dynamics of voltage-gated sodium channel isoform expression in the human and mouse brain	Liang L, Fazel Darbandi S, Pochareddy S, Gulden FO, Gilson MC, Sheppard BK, Sahagun A, An JY, Werling DM, Rubenstein JLR, Sestan N, Bender KJ, Sanders SJ.		Liang L	Genome Med	2021	PMC8383430		10.1186/s13073-021-00949-0
22704920	Diagnosis and long-term course of Dravet syndrome	Scheffer IE.		Scheffer IE	Eur J Paediatr Neurol	2012			10.1016/j.ejpn.2012.04.007
32430436	Diagnostic and therapeutic aspects of hemiplegic migraine	Di Stefano V, Rispoli MG, Pellegrino N, Graziosi A, Rotondo E, Napoli C, Pietrobon D, Brighina F, Parisi P.		Di Stefano V	J Neurol Neurosurg Psychiatry	2020	PMC7361005		10.1136/jnnp-2020-322850
26271793	Diagnostic Approach to Genetic Causes of Early-Onset Epileptic Encephalopathy	G¨¹rsoy S, Er?al D.		G¨¹rsoy S	J Child Neurol	2016			10.1177/0883073815599262
32086284	Diagnostic exome sequencing in non-acquired focal epilepsies highlights a major role of GATOR1 complex genes	Krenn M, Wagner M, Hotzy C, Graf E, Weber S, Brunet T, Lorenz-Depiereux B, Kasprian G, Aull-Watschinger S, Pataraia E, Stogmann E, Zimprich A, Strom TM, Meitinger T, Zimprich F.		Krenn M	J Med Genet	2020			10.1136/jmedgenet-2019-106658
29655203	Diagnostic outcomes for genetic testing of 70 genes in 8565 patients with epilepsy and neurodevelopmental disorders	Lindy AS, Stosser MB, Butler E, Downtain-Pickersgill C, Shanmugham A, Retterer K, Brandt T, Richard G, McKnight DA.		Lindy AS	Epilepsia	2018			10.1111/epi.14074
27864847	Diagnostic Targeted Resequencing in 349 Patients with Drug-Resistant Pediatric Epilepsies Identifies Causative Mutations in 30 Different Genes	Parrini E, Marini C, Mei D, Galuppi A, Cellini E, Pucatti D, Chiti L, Rutigliano D, Bianchini C, Vird¨° S, De Vita D, Bigoni S, Barba C, Mari F, Montomoli M, Pisano T, Rosati A; Clinical Study Group, Guerrini R.		Parrini E	Hum Mutat	2017			10.1002/humu.23149
29056246	Diagnostic Yield From 339 Epilepsy Patients Screened on a Clinical Gene Panel	Butler KM, da Silva C, Alexander JJ, Hegde M, Escayg A.		Butler KM	Pediatr Neurol	2017	PMC6885003	NIHMS914490	10.1016/j.pediatrneurol.2017.09.003
27726903	Diagnostic Yield of Epilepsy Panels in Children With Medication-Refractory Epilepsy	Segal E, Pedro H, Valdez-Gonzalez K, Parisotto S, Gliksman F, Thompson S, Sabri J, Fertig E.		Segal E	Pediatr Neurol	2016			10.1016/j.pediatrneurol.2016.06.019
25818041	Diagnostic yield of genetic testing in epileptic encephalopathy in childhood	Mercimek-Mahmutoglu S, Patel J, Cordeiro D, Hewson S, Callen D, Donner EJ, Hahn CD, Kannu P, Kobayashi J, Minassian BA, Moharir M, Siriwardena K, Weiss SK, Weksberg R, Snead OC 3rd.		Mercimek-Mahmutoglu S	Epilepsia	2015			10.1111/epi.12954
29852413	Diagnostic yield of targeted massively parallel sequencing in children with epileptic encephalopathy	Kothur K, Holman K, Farnsworth E, Ho G, Lorentzos M, Troedson C, Gupta S, Webster R, Procopis PG, Menezes MP, Antony J, Ardern-Holmes S, Dale RC, Christodoulou J, Gill D, Bennetts B.		Kothur K	Seizure	2018			10.1016/j.seizure.2018.05.005
34293681	Differences in SCN1A intronic variants result in diverse aberrant splicing patterns and are related to the phenotypes of epilepsy with febrile seizures	Zhou X, Xu H, Cai X, Tang B, Liu X, Shi Y, Zheng J, Liao W, Yu L.		Zhou X	Epilepsy Res	2021			10.1016/j.eplepsyres.2021.106711
22525008	Different degrees of loss of function between GEFS+ and SMEI Nav 1.1 missense mutants at the same residue induced by rescuable folding defects	Sugiura Y, Ogiwara I, Hoshi A, Yamakawa K, Ugawa Y.		Sugiura Y	Epilepsia	2012			10.1111/j.1528-1167.2012.03467.x
28832970	Differential binding of tetrodotoxin and its derivatives to voltage-sensitive sodium channel subtypes (Na(v) 1.1 to Na(v) 1.7)	Tsukamoto T, Chiba Y, Wakamori M, Yamada T, Tsunogae S, Cho Y, Sakakibara R, Imazu T, Tokoro S, Satake Y, Adachi M, Nishikawa T, Yotsu-Yamashita M, Konoki K.		Tsukamoto T	Br J Pharmacol	2017	PMC5647187		10.1111/bph.13985
29295803	Differential effects on sodium current impairments by distinct SCN1A mutations in GABAergic neurons derived from Dravet syndrome patients	Kim HW, Quan Z, Kim YB, Cheong E, Kim HD, Cho M, Jang J, Yoo YR, Lee JS, Kim JH, Kim YI, Kim DS, Kang HC.		Kim HW	Brain Dev	2018			10.1016/j.braindev.2017.12.002
20924084	Differential evolution of voltage-gated sodium channels in tetrapods and teleost fishes	Widmark J, Sundstr?m G, Ocampo Daza D, Larhammar D.		Widmark J	Mol Biol Evol	2011			10.1093/molbev/msq257
31928904	Differential excitatory vs inhibitory SCN expression at single cell level regulates brain sodium channel function in neurodevelopmental disorders	Du J, Simmons S, Brunklaus A, Adiconis X, Hession CC, Fu Z, Li Y, Shema R, M?ller RS, Barak B, Feng G, Meisler M, Sanders S, Lerche H, Campbell AJ, McCarroll S, Levin JZ, Lal D.		Du J	Eur J Paediatr Neurol	2020			10.1016/j.ejpn.2019.12.019
20006674	Differential expression of exon 5 splice variants of sodium channel alpha subunit mRNAs in the developing mouse brain	Gazina EV, Richards KL, Mokhtar MB, Thomas EA, Reid CA, Petrou S.		Gazina EV	Neuroscience	2010			10.1016/j.neuroscience.2009.12.011
19694741	Differential role of sodium channels SCN1A and SCN2A gene polymorphisms with epilepsy and multiple drug resistance in the north Indian population	Lakhan R, Kumari R, Misra UK, Kalita J, Pradhan S, Mittal B.		Lakhan R	Br J Clin Pharmacol	2009	PMC2767285		10.1111/j.1365-2125.2009.03437.x
19359143	Digenic mutations in severe myoclonic epilepsy of infancy	Bolszak M, Anttonen AK, Komulainen T, Hinttala R, Pakanen S, Sormunen R, Herva R, Lehesjoki AE, Majamaa K, Rantala H, Uusimaa J.		Bolszak M	Epilepsy Res	2009			10.1016/j.eplepsyres.2009.03.004
22594501	Discovery of epilepsy susceptibility genes: implications for therapy development and pharmacogenomics	Ferraro TN.		Ferraro TN	Pharmacogenomics	2012			10.2217/pgs.12.31
33144172	Disordered autonomic function during exposure to moderate heat or exercise in a mouse model of Dravet syndrome	Sahai N, Bard AM, Devinsky O, Kalume F.		Sahai N	Neurobiol Dis	2021	PMC7725859	NIHMS1645077	10.1016/j.nbd.2020.105154
31025941	Disordered breathing in a mouse model of Dravet syndrome	Kuo FS, Cleary CM, LoTurco JJ, Chen X, Mulkey DK.		Kuo FS	Elife	2019	PMC6506208		10.7554/eLife.43387
31653223	Dissecting the genetic basis of comorbid epilepsy phenotypes in neurodevelopmental disorders	Chow J, Jensen M, Amini H, Hormozdiari F, Penn O, Shifman S, Girirajan S, Hormozdiari F.		Chow J	Genome Med	2019	PMC6815046		10.1186/s13073-019-0678-y
22780699	Dissecting the genetic basis of myoclonic-astatic epilepsy	Tang S, Pal DK.		Tang S	Epilepsia	2012			10.1111/j.1528-1167.2012.03581.x
15007009	Distinct subcellular localization of different sodium channel alpha and beta subunits in single ventricular myocytes from mouse heart	Maier SK, Westenbroek RE, McCormick KA, Curtis R, Scheuer T, Catterall WA.		Maier SK	Circulation	2004			10.1161/01.CIR.0000121421.61896.24
23398611	Divergent effects of the T1174S SCN1A mutation associated with seizures and hemiplegic migraine	Cest¨¨le S, Labate A, Rusconi R, Tarantino P, Mumoli L, Franceschetti S, Annesi G, Mantegazza M, Gambardella A.		Cest¨¨le S	Epilepsia	2013			10.1111/epi.12123
18621678	Divergent sodium channel defects in familial hemiplegic migraine	Kahlig KM, Rhodes TH, Pusch M, Freilinger T, Pereira-Monteiro JM, Ferrari MD, van den Maagdenberg AM, Dichgans M, George AL Jr.		Kahlig KM	Proc Natl Acad Sci U S A	2008	PMC2474506		10.1073/pnas.0711717105
23182416	Do mutations in SCN1B cause Dravet syndrome?	Kim YO, Dibbens L, Marini C, Suls A, Chemaly N, Mei D, McMahon JM, Iona X, Berkovic SF, De Jonghe P, Guerrini R, Nabbout R, Scheffer IE.		Kim YO	Epilepsy Res	2013			10.1016/j.eplepsyres.2012.10.009
18554360	Do SCN1A mutations protect from hippocampal sclerosis?	Auvin S, Dulac O, Vall¨¦e L.		Auvin S	Epilepsia	2008			10.1111/j.1528-1167.2008.01549_3.x
19292758	Does a SCN1A gene mutation confer earlier age of onset of febrile seizures in GEFS+?	Sijben AE, Sithinamsuwan P, Radhakrishnan A, Badawy RA, Dibbens L, Mazarib A, Lev D, Lerman-Sagie T, Straussberg R, Berkovic SF, Scheffer IE.		Sijben AE	Epilepsia	2009			10.1111/j.1528-1167.2009.02023.x
21248272	Does genotype determine phenotype? Sodium channel mutations in Dravet syndrome and GEFS+	Scheffer IE.		Scheffer IE	Neurology	2011			10.1212/WNL.0b013e31820d8b51
31402621	Donepezil increases resistance to induced seizures in a mouse model of Dravet syndrome	Wong JC, Thelin JT, Escayg A.		Wong JC	Ann Clin Transl Neurol	2019	PMC6689688		10.1002/acn3.50848
22260870	Dorsal root ganglia isolated from Nf1+/- mice exhibit increased levels of mRNA expression of voltage-dependent sodium channels	Hodgdon KE, Hingtgen CM, Nicol GD.		Hodgdon KE	Neuroscience	2012			10.1016/j.neuroscience.2011.12.045
12835125	Down regulation of sodium channel Na(v)1.1 expression by veratridine and its reversal by a novel sodium channel blocker, RS100642, in primary neuronal cultures	Dave JR, Yao C, Moffett JR, Berti R, Koenig M, Tortella FC.		Dave JR	Neurotox Res	2003			10.1007/BF03033141
29115566	Downregulation of microRNA?155 by preoperative administration of valproic acid prevents postoperative seizures by upregulating SCN1A	Zhang Z, Wang Z, Zhang B, Liu Y.		Zhang Z	Mol Med Rep	2018			10.3892/mmr.2017.8004
17273863	Downregulation of neuronal sodium channel subunits Nav1.1 and Nav1.6 in the sinoatrial node from volume-overloaded heart failure rat	Du Y, Huang X, Wang T, Han K, Zhang J, Xi Y, Wu G, Ma A.		Du Y	Pflugers Arch	2007			10.1007/s00424-007-0216-4
15878599	Down-regulation of the sodium channel Na(v)1.1 alpha-subunit following focal ischemic brain injury in rats: in situ hybridization and immunohistochemical analysis	Yao C, Williams AJ, Hartings JA, Lu XC, Tortella FC, Dave JR.		Yao C	Life Sci	2005			10.1016/j.lfs.2005.02.008
19737414	Dravet syndrome	Incorpora G.		Incorpora G	Ital J Pediatr	2009	PMC2745418		10.1186/1824-7288-35-27
33395108	Dravet syndrome	Lagae L.		Lagae L	Curr Opin Neurol	2021			10.1097/WCO.0000000000000902
23622210	Dravet syndrome (severe myoclonic epilepsy in infancy)	Dravet C, Oguni H.		Dravet C	Handb Clin Neurol	2013			10.1016/B978-0-444-52891-9.00065-8
17621480	Dravet syndrome (severe myoclonic epilepsy in infancy): a retrospective study of 16 patients	Korff C, Laux L, Kelley K, Goldstein J, Koh S, Nordli D Jr.		Korff C	J Child Neurol	2007			10.1177/0883073807300294
33937968	Dravet syndrome and Dravet syndrome-like phenotype: a systematic review of the SCN1A and PCDH19 variants	Rampazzo ACM, Dos Santos RRP, Maluf FA, Simm RF, Marson FAL, Ortega MM, de Aguiar PHP.		Rampazzo ACM	Neurogenetics	2021			10.1007/s10048-021-00644-7
20187876	Dravet syndrome and 'immunization encephalopathy'	Neville B.		Neville B	Dev Med Child Neurol	2010			10.1111/j.1469-8749.2010.03638.x
28880996	Dravet syndrome and its mimics: Beyond SCN1A	Steel D, Symonds JD, Zuberi SM, Brunklaus A.		Steel D	Epilepsia	2017			10.1111/epi.13889
21463290	Dravet syndrome and parent associations: the IDEA League experience with comorbid conditions, mortality, management, adaptation, and grief	Skluzacek JV, Watts KP, Parsy O, Wical B, Camfield P.		Skluzacek JV	Epilepsia	2011			10.1111/j.1528-1167.2011.03012.x
31444242	Dravet syndrome and parkinsonism: A case report investigating the dopaminergic system	Deuel L, Collins AE, Maa EH, Barr JP, Kern DS.		Deuel L	Neurology	2019			10.1212/WNL.0000000000008171
21504426	Dravet syndrome and SCN1A gene mutation related-epilepsies: cognitive impairment and its determinants	Guerrini R, Falchi M.		Guerrini R	Dev Med Child Neurol	2011			10.1111/j.1469-8749.2011.03966.x
20447869	Dravet syndrome and vaccination: when science prevails over speculation	Wiznitzer M.		Wiznitzer M	Lancet Neurol	2010			10.1016/S1474-4422(10)70109-5
21719429	Dravet syndrome as epileptic encephalopathy: evidence from long-term course and neuropathology	Catarino CB, Liu JY, Liagkouras I, Gibbons VS, Labrum RW, Ellis R, Woodward C, Davis MB, Smith SJ, Cross JH, Appleton RE, Yendle SC, McMahon JM, Bellows ST, Jacques TS, Zuberi SM, Koepp MJ, Martinian L, Scheffer IE, Thom M, Sisodiya SM.		Catarino CB	Brain	2011	PMC3187538		10.1093/brain/awr129
31904125	Dravet syndrome as part of the clinical and genetic spectrum of sodium channel epilepsies and encephalopathies	Mei D, Cetica V, Marini C, Guerrini R.		Mei D	Epilepsia	2019			10.1111/epi.16054
21504424	Dravet syndrome history	Dravet C.		Dravet C	Dev Med Child Neurol	2011			10.1111/j.1469-8749.2011.03964.x
30805006	Dravet Syndrome in Lebanon: First Report on Cases with SCN1A Mutations	Alame S, El-Houwayek E, Nava C, Sabbagh S, Fawaz A, Gillart AC, Hasbini D, Depienne C, M¨¦garban¨¦ A.		Alame S	Case Rep Med	2019	PMC6360541		10.1155/2019/5270503
30321769	Dravet syndrome in South African infants: Tools for an early diagnosis	Esterhuizen AI, Mefford HC, Ramesar RS, Wang S, Carvill GL, Wilmshurst JM.		Esterhuizen AI	Seizure	2018	PMC6261486	NIHMS1509611	10.1016/j.seizure.2018.09.010
25772213	Dravet syndrome in Sweden: a population-based study	Rosander C, Hallb??k T.		Rosander C	Dev Med Child Neurol	2015			10.1111/dmcn.12709
19203856	Dravet syndrome or genetic (generalized) epilepsy with febrile seizures plus?	Scheffer IE, Zhang YH, Jansen FE, Dibbens L.		Scheffer IE	Brain Dev	2009			10.1016/j.braindev.2009.01.001
23821540	Dravet syndrome patient-derived neurons suggest a novel epilepsy mechanism	Liu Y, Lopez-Santiago LF, Yuan Y, Jones JM, Zhang H, O'Malley HA, Patino GA, O'Brien JE, Rusconi R, Gupta A, Thompson RC, Natowicz MR, Meisler MH, Isom LL, Parent JM.		Liu Y	Ann Neurol	2013	PMC3775921	NIHMS460765	10.1002/ana.23897
21865128	Dravet syndrome with an exceptionally good seizure outcome in two adolescents	Kobayashi K, Ohmori I, Ouchida M, Ohtsuka Y.		Kobayashi K	Epileptic Disord	2011			10.1684/epd.2011.0453
27653866	Dravet syndrome with autism inherited from a paternal mosaic heterozygous mutation on SCN1A	Xiong Z, Yi L, Cao D, He W, Chen J, Gao S, Sun X.		Xiong Z	J Neurol Sci	2016			10.1016/j.jns.2016.07.038
27209029	Dravet syndrome with favourable cognitive and behavioral development due to a novel SCN1A frameshift mutation	Jiang P, Shen J, Yu Y, Jiang L, Xu J, Xu L, Yu H, Gao F.		Jiang P	Clin Neurol Neurosurg	2016			10.1016/j.clineuro.2016.05.008
33199159	Dravet syndrome with parkinsonian symptoms and intact dopaminergic neurons: A case report	Kanatani M, Adachi T, Sakata R, Nishimura Y, Saito Y, Maegaki Y, Watanabe Y, Hanajima R.		Kanatani M	Brain Dev	2021			10.1016/j.braindev.2020.10.015
23291792	Dravet syndrome, what is new?	Al-Baradie RS.		Al-Baradie RS	Neurosciences (Riyadh)	2013
30838929	Dravet Syndrome: A Developmental and Epileptic Encephalopathy	Lopez-Santiago L, Isom LL.		Lopez-Santiago L	Epilepsy Curr	2019	PMC6610375		10.1177/1535759718822038
23093055	Dravet syndrome: a genetic epileptic disorder	Akiyama M, Kobayashi K, Ohtsuka Y.		Akiyama M	Acta Med Okayama	2012			10.18926/AMO/48961
28469861	Dravet syndrome: a new causative SCN1A mutation?	Poryo M, Clasen O, Oehl-Jaschkowitz B, Christmann A, Gortner L, Meyer S.		Poryo M	Clin Case Rep	2017	PMC5412774		10.1002/ccr3.787
32165031	Dravet Syndrome: A Review of Current Management	Wheless JW, Fulton SP, Mudigoudar BD.		Wheless JW	Pediatr Neurol	2020			10.1016/j.pediatrneurol.2020.01.005
30123852	Dravet Syndrome: A Sodium Channel Interneuronopathy	Catterall WA.		Catterall WA	Curr Opin Physiol	2018	PMC6091224	NIHMS930505	10.1016/j.cophys.2017.12.007
21313790	Dravet syndrome: a technologist's perspective	Lordeon PA, Sitwat B, Brehm D, Holder D.		Lordeon PA	Am J Electroneurodiagnostic Technol	2010
31497436	Dravet Syndrome: An Overview	Anwar A, Saleem S, Patel UK, Arumaithurai K, Malik P.		Anwar A	Cureus	2019	PMC6713249		10.7759/cureus.5006
28732259	Dravet syndrome: Characteristics, comorbidities, and caregiver concerns	Villas N, Meskis MA, Goodliffe S.		Villas N	Epilepsy Behav	2017			10.1016/j.yebeh.2017.06.031
27264139	Dravet Syndrome: Diagnosis and Long-Term Course	Connolly MB.		Connolly MB	Can J Neurol Sci	2016			10.1017/cjn.2016.243
19854600	Dravet syndrome: early clinical manifestations and cognitive outcome in 37 Italian patients	Ragona F, Brazzo D, De Giorgi I, Morbi M, Freri E, Teutonico F, Gennaro E, Zara F, Binelli S, Veggiotti P, Granata T.		Ragona F	Brain Dev	2010			10.1016/j.braindev.2009.09.014
19702726	Dravet syndrome: from electroclinical characteristics to molecular biology	Arzimanoglou A.		Arzimanoglou A	Epilepsia	2009			10.1111/j.1528-1167.2009.02228.x
21163495	Dravet syndrome: inroads into understanding epileptic encephalopathies	Morse RP.		Morse RP	J Pediatr	2011			10.1016/j.jpeds.2010.10.035
21463283	Dravet syndrome: insights from in vitro experimental models	Mantegazza M.		Mantegazza M	Epilepsia	2011			10.1111/j.1528-1167.2011.03005.x
23808377	Dravet syndrome: new potential genetic modifiers, imaging abnormalities, and ictal findings	Gaily E, Anttonen AK, Valanne L, Liukkonen E, Tr?skelin AL, Polvi A, Lommi M, Muona M, Eriksson K, Lehesjoki AE.		Gaily E	Epilepsia	2013			10.1111/epi.12256
27316245	Dravet syndrome: Not just epilepsy	Guerrini R, Striano P.		Guerrini R	Neurology	2016			10.1212/WNL.0000000000002873
34378168	Dravet Syndrome: Novel Approaches for the Most Common Genetic Epilepsy	Isom LL, Knupp KG.		Isom LL	Neurotherapeutics	2021			10.1007/s13311-021-01095-6
21906962	Dravet syndrome: patients with co-morbid SCN1A gene mutations and mitochondrial electron transport chain defects	Craig AK, de Menezes MS, Saneto RP.		Craig AK	Seizure	2012			10.1016/j.seizure.2011.08.010
22780858	Dravet syndrome: seizure control and gait in adults with different SCN1A mutations	Rilstone JJ, Coelho FM, Minassian BA, Andrade DM.		Rilstone JJ	Epilepsia	2012			10.1111/j.1528-1167.2012.03583.x
22705271	Dravet syndrome: the main issues	Guerrini R.		Guerrini R	Eur J Paediatr Neurol	2012			10.1016/j.ejpn.2012.04.006
34095830	Dravet syndrome-associated mutations in GABRA1, GABRB2 and GABRG2 define the genetic landscape of defects of GABA(A) receptors	Hernandez CC, Tian X, Hu N, Shen W, Catron MA, Yang Y, Chen J, Jiang Y, Zhang Y, Macdonald RL.		Hernandez CC	Brain Commun	2021	PMC8176149		10.1093/braincomms/fcab033
22050316	Dravet syndrome--considerable delay in making the diagnosis	Bremer A, Lossius MI, Nakken KO.		Bremer A	Acta Neurol Scand	2012			10.1111/j.1600-0404.2011.01609.x
24836964	Dravet syndrome--from epileptic encephalopathy to channelopathy	Brunklaus A, Zuberi SM.		Brunklaus A	Epilepsia	2014			10.1111/epi.12652
21115970	Drosophila as a model for epilepsy: bss is a gain-of-function mutation in the para sodium channel gene that leads to seizures	Parker L, Padilla M, Du Y, Dong K, Tanouye MA.		Parker L	Genetics	2011	PMC3030494		10.1534/genetics.110.123299
24002024	Drug screening in Scn1a zebrafish mutant identifies clemizole as a potential Dravet syndrome treatment	Baraban SC, Dinday MT, Hortopan GA.		Baraban SC	Nat Commun	2013	PMC3891590	NIHMS513486	10.1038/ncomms3410
23016767	Duplication of the sodium channel gene cluster on 2q24 in children with early onset epilepsy	Goeggel Simonetti B, Rieubland C, Courage C, Strozzi S, Tschumi S, Gallati S, Lemke JR.		Goeggel Simonetti B	Epilepsia	2012			10.1111/j.1528-1167.2012.03676.x
27246997	Dynamic changes of depolarizing GABA in a computational model of epileptogenic brain: Insight for Dravet syndrome	Kurbatova P, Wendling F, Kaminska A, Rosati A, Nabbout R, Guerrini R, Dulac O, Pons G, Cornu C, Nony P; CRESIM/EpiCRESIM Study Group, Chiron C, Benquet P.		Kurbatova P	Exp Neurol	2016	PMC5681703		10.1016/j.expneurol.2016.05.037
28148630	Dysarthria and broader motor speech deficits in Dravet syndrome	Turner SJ, Brown A, Arpone M, Anderson V, Morgan AT, Scheffer IE.		Turner SJ	Neurology	2017	PMC5344083		10.1212/WNL.0000000000003635
24168886	Early clinical features and diagnosis of Dravet syndrome in 138 Chinese patients with SCN1A mutations	Xu X, Zhang Y, Sun H, Liu X, Yang X, Xiong H, Jiang Y, Bao X, Wang S, Yang Z, Wu Y, Qin J, Lin Q, Wu X.		Xu X	Brain Dev	2014			10.1016/j.braindev.2013.10.004
22071555	Early clinical features in Dravet syndrome patients with and without SCN1A mutations	Petrelli C, Passamonti C, Cesaroni E, Mei D, Guerrini R, Zamponi N, Provinciali L.		Petrelli C	Epilepsy Res	2012			10.1016/j.eplepsyres.2011.10.010
30612077	Early infantile SCN1A epileptic encephalopathy: Expanding the genotype-phenotype correlations	Spagnoli C, Frattini D, Rizzi S, Salerno GG, Fusco C.		Spagnoli C	Seizure	2019			10.1016/j.seizure.2019.01.002
18070091	Early treatment suppresses the development of spike-wave epilepsy in a rat model	Blumenfeld H, Klein JP, Schridde U, Vestal M, Rice T, Khera DS, Bashyal C, Giblin K, Paul-Laughinghouse C, Wang F, Phadke A, Mission J, Agarwal RK, Englot DJ, Motelow J, Nersesyan H, Waxman SG, Levin AR.		Blumenfeld H	Epilepsia	2008	PMC3143182	NIHMS308771	10.1111/j.1528-1167.2007.01458.x
28373025	Early-life febrile seizures worsen adult phenotypes in Scn1a mutants	Dutton SBB, Dutt K, Papale LA, Helmers S, Goldin AL, Escayg A.		Dutton SBB	Exp Neurol	2017	PMC5538963	NIHMS870271	10.1016/j.expneurol.2017.03.026
32597768	Early-onset epileptic encephalopathy with migrating focal seizures associated with a FARS2 homozygous nonsense variant	Ville D, Lesca G, Labalme A, Portes VD, Arzimanoglou A, de Bellescize J.		Ville D	Epileptic Disord	2020			10.1684/epd.2020.1168
34521063	Early-onset eyelid stereotypies are a frequent and distinctive feature in Dravet syndrome	Sala-Coromina J, Raspall-Chaure M, Marc¨¦-Grau A, de la Ossa AM, Macaya A.		Sala-Coromina J	Seizure	2021			10.1016/j.seizure.2021.08.020
26763045	Early-onset familial hemiplegic migraine due to a novel SCN1A mutation	Fan C, Wolking S, Lehmann-Horn F, Hedrich UB, Freilinger T, Lerche H, Borck G, Kubisch C, Jurkat-Rott K.		Fan C	Cephalalgia	2016	PMC5105328		10.1177/0333102415608360
19703358	Effect of electroacupuncture on the expression of Nav1.1 in rat after acute cerebral ischemia	Ren L, Fang Yn, Zhang Aw, Li Xl, Wang Xj, Yin Z, Miao Jy.		Ren L	Neurol Res	2010			10.1179/016164109X12445616596481
20483028	Effect of electroacupuncture therapy on the expression of Na(v)1.1 and Na(v)1.6 in rat after acute cerebral ischemia	Ren L, Wang YK, Fang YN, Zhang AW, Li XL.		Ren L	Neurol Res	2010			10.1179/016164110X12700393823453
15277629	Effect of localization of missense mutations in SCN1A on epilepsy phenotype severity	Kanai K, Hirose S, Oguni H, Fukuma G, Shirasaka Y, Miyajima T, Wada K, Iwasa H, Yasumoto S, Matsuo M, Ito M, Mitsudome A, Kaneko S.		Kanai K	Neurology	2004			10.1212/01.wnl.0000129829.31179.5b
26203087	Effect of vaccinations on seizure risk and disease course in Dravet syndrome	Verbeek NE, van der Maas NA, Sonsma AC, Ippel E, Vermeer-de Bondt PE, Hagebeuk E, Jansen FE, Geesink HH, Braun KP, de Louw A, Augustijn PB, Neuteboom RF, Schieving JH, Stroink H, Vermeulen RJ, Nicolai J, Brouwer OF, van Kempen M, de Kovel CG, Kemmeren JM, Koeleman BP, Knoers NV, Lindhout D, Gunning WB, Brilstra EH.		Verbeek NE	Neurology	2015			10.1212/WNL.0000000000001855
23494229	Effects of an epilepsy-causing mutation in the SCN1A sodium channel gene on cocaine-induced seizure susceptibility in mice	Purcell RH, Papale LA, Makinson CD, Sawyer NT, Schroeder JP, Escayg A, Weinshenker D.		Purcell RH	Psychopharmacology (Berl)	2013	PMC3695079	NIHMS456219	10.1007/s00213-013-3034-8
33798941	Effects of antiepileptic drugs' administration during pregnancy on the nerve cell proliferation and axonal outgrowth of human neuroblastoma SH-SY5Y nerve cells	Kakumoto M, Shimokawa K, Ueshima S, Hira D, Okano T.		Kakumoto M	Biochem Biophys Res Commun	2021			10.1016/j.bbrc.2021.03.107
24125961	Effects of EPHX1, SCN1A and CYP3A4 genetic polymorphisms on plasma carbamazepine concentrations and pharmacoresistance in Chinese patients with epilepsy	Yun W, Zhang F, Hu C, Luo X, Xue P, Wang J, Ge Y, Meng H, Guo Y.		Yun W	Epilepsy Res	2013			10.1016/j.eplepsyres.2013.09.011
24357141	Effects of normal aging and SCN1A risk-gene expression on brain metabolites: evidence for an association between SCN1A and myo-inositol	Tunc-Skarka N, Meier S, Demirakca T, Sack M, Weber-Fahr W, Brusniak W, Wolf I, Matth?us F, Schulze TG, Diener C, Ende G.		Tunc-Skarka N	NMR Biomed	2014			10.1002/nbm.3057
22966884	Effects of polymorphisms in six candidate genes on phenytoin maintenance therapy in Han Chinese patients	Hung CC, Huang HC, Gao YH, Chang WL, Ho JL, Chiou MH, Hsieh YW, Liou HH.		Hung CC	Pharmacogenomics	2012			10.2217/pgs.12.117
22591328	Effects of SCN1A and GABA receptor genetic polymorphisms on carbamazepine tolerability and efficacy in Chinese patients with partial seizures: 2-year longitudinal clinical follow-up	Zhou BT, Zhou QH, Yin JY, Li GL, Qu J, Xu XJ, Liu D, Zhou HH, Liu ZQ.		Zhou BT	CNS Neurosci Ther	2012	PMC6493603		10.1111/j.1755-5949.2012.00321.x
33096315	Effects of SCN1A and SCN2A polymorphisms on responsiveness to valproic acid monotherapy in epileptic children	Liu M, Mao J, Xu H, Wang J, Zhao P, Xu Q, Du Z.		Liu M	Epilepsy Res	2020			10.1016/j.eplepsyres.2020.106485
34011048	Effects of SCN1A and SCN2A polymorphisms on responsiveness to valproic acid monotherapy in epileptic children: A protocol for systematic review and meta-analysis	Wen Z, Chen J, Zhu B, Lu Y, Chen L.		Wen Z	Medicine (Baltimore)	2021	PMC8136989		10.1097/MD.0000000000025831
29679912	Effects of UGT2B7, SCN1A and CYP3A4 on the therapeutic response of sodium valproate treatment in children with generalized seizures	Feng W, Mei S, Zhu L, Yu Y, Yang W, Gao B, Wu X, Zhao Z, Fang F.		Feng W	Seizure	2018			10.1016/j.seizure.2018.04.006
20447868	Effects of vaccination on onset and outcome of Dravet syndrome: a retrospective study	McIntosh AM, McMahon J, Dibbens LM, Iona X, Mulley JC, Scheffer IE, Berkovic SF.		McIntosh AM	Lancet Neurol	2010			10.1016/S1474-4422(10)70107-1
32945537	Efficacy and safety of Fenfluramine hydrochloride for the treatment of seizures in Dravet syndrome: A real-world study	Specchio N, Pietrafusa N, Doccini V, Trivisano M, Darra F, Ragona F, Cossu A, Spolverato S, Battaglia D, Quintiliani M, Luigia Gambardella M, Rosati A, Mei D, Granata T, Dalla Bernardina B, Vigevano F, Guerrini R.		Specchio N	Epilepsia	2020			10.1111/epi.16690
28666193	Efficacy of adjunctive vagus nerve stimulation in patients with Dravet syndrome: A meta-analysis of 68 patients	Dibu¨¦-Adjei M, Fischer I, Steiger HJ, Kamp MA.		Dibu¨¦-Adjei M	Seizure	2017			10.1016/j.seizure.2017.06.007
26183863	Efficacy of antiepileptic drugs for the treatment of Dravet syndrome with different genotypes	Shi XY, Tomonoh Y, Wang WZ, Ishii A, Higurashi N, Kurahashi H, Kaneko S, Hirose S; Epilepsy Genetic Study Group, Japan.		Shi XY	Brain Dev	2016			10.1016/j.braindev.2015.06.008
31280948	Efficacy of antiepileptic drugs in the era of pharmacogenomics: A focus on childhood	Gogou M, Pavlou E.		Gogou M	Eur J Paediatr Neurol	2019			10.1016/j.ejpn.2019.06.004
29141279	Efficacy of Stiripentol in Dravet Syndrome with or without SCN1A Mutations	Cho MJ, Kwon SS, Ko A, Lee ST, Lee YM, Kim HD, Chung HJ, Kim SH, Lee JS, Kim DS, Kang HC.		Cho MJ	J Clin Neurol	2018	PMC5765252		10.3988/jcn.2018.14.1.22
22578034	Efficacy of stiripentol in hyperthermia-induced seizures in a mouse model of Dravet syndrome	Cao D, Ohtani H, Ogiwara I, Ohtani S, Takahashi Y, Yamakawa K, Inoue Y.		Cao D	Epilepsia	2012			10.1111/j.1528-1167.2012.03497.x
24113539	Efficacy of verapamil as an adjunctive treatment in children with drug-resistant epilepsy: a pilot study	Nicita F, Spalice A, Papetti L, Nikanorova M, Iannetti P, Parisi P.		Nicita F	Seizure	2014			10.1016/j.seizure.2013.09.009
29390993	Efficient strategy for the molecular diagnosis of intractable early-onset epilepsy using targeted gene sequencing	Rim JH, Kim SH, Hwang IS, Kwon SS, Kim J, Kim HW, Cho MJ, Ko A, Youn SE, Kim J, Lee YM, Chung HJ, Lee JS, Kim HD, Choi JR, Lee ST, Kang HC.		Rim JH	BMC Med Genomics	2018	PMC5796507		10.1186/s12920-018-0320-7
21463281	Electrical and autonomic cardiac function in patients with Dravet syndrome	Delogu AB, Spinelli A, Battaglia D, Dravet C, De Nisco A, Saracino A, Romagnoli C, Lanza GA, Crea F.		Delogu AB	Epilepsia	2011			10.1111/j.1528-1167.2011.03003.x
17565594	Electroclinical features of a family with simple febrile seizures and temporal lobe epilepsy associated with SCN1A loss-of-function mutation	Colosimo E, Gambardella A, Mantegazza M, Labate A, Rusconi R, Schiavon E, Annesi F, Cassulini RR, Carrideo S, Chifari R, Canevini MP, Canger R, Franceschetti S, Annesi G, Wanke E, Quattrone A.		Colosimo E	Epilepsia	2007			10.1111/j.1528-1167.2007.01153.x
32880473	Electroclinical Phenotype-Genotype Homogeneity in Drug-Resistant "Generalized" Tonic-Clonic Seizures of Early Childhood	Jukkarwala A, Menon RN, Sunesh ER, Radhakrishnan A.		Jukkarwala A	Clin EEG Neurosci	2021			10.1177/1550059420953735
22019839	Electroencephalographic features in dravet syndrome: five-year follow-up study in 22 patients	Specchio N, Balestri M, Trivisano M, Japaridze N, Striano P, Carotenuto A, Cappelletti S, Specchio LM, Fusco L, Vigevano F.		Specchio N	J Child Neurol	2012			10.1177/0883073811419262
25459968	Electroencephalographic features of patients with SCN1A-positive Dravet syndrome	Lee HF, Chi CS, Tsai CR, Chen CH, Wang CC.		Lee HF	Brain Dev	2015			10.1016/j.braindev.2014.10.003
32554600	Electrophysiological Alterations of Pyramidal Cells and Interneurons of the CA1 Region of the Hippocampus in a Novel Mouse Model of Dravet Syndrome	Dyment DA, Schock SC, Deloughery K, Tran MH, Ure K, Nutter LMJ, Creighton A, Yuan J, Banderali U, Comas T, Baumann E, Jezierski A; Care4Rare Canada Consortium,, Boycott KM, Mackenzie AE, Martina M.		Dyment DA	Genetics	2020	PMC7404236		10.1534/genetics.120.303399
24990319	Electrophysiological Differences between the Same Pore Region Mutation in SCN1A and SCN3A	Chen YJ, Shi YW, Xu HQ, Chen ML, Gao MM, Sun WW, Tang B, Zeng Y, Liao WP.		Chen YJ	Mol Neurobiol	2015			10.1007/s12035-014-8802-x
19332696	Elicited repetitive daily blindness: a new phenotype associated with hemiplegic migraine and SCN1A mutations	Vahedi K, Depienne C, Le Fort D, Riant F, Chaine P, Trouillard O, Gaudric A, Morris MA, Leguern E, Tournier-Lasserve E, Bousser MG.		Vahedi K	Neurology	2009			10.1212/01.wnl.0000345393.53132.8c
21426328	Encephalopathy and SCN1A mutations	Tang S, Lin JP, Hughes E, Siddiqui A, Lim M, Lascelles K.		Tang S	Epilepsia	2011			10.1111/j.1528-1167.2011.03019.x
24225340	Encephalopathy in children with Dravet syndrome is not a pure consequence of epilepsy	Nabbout R, Chemaly N, Chipaux M, Barcia G, Bouis C, Dubouch C, Leunen D, Jambaqu¨¦ I, Dulac O, Dellatolas G, Chiron C.		Nabbout R	Orphanet J Rare Dis	2013	PMC4225757		10.1186/1750-1172-8-176
11422459	Enhanced inactivation and acceleration of activation of the sodium channel associated with epilepsy in man	Alekov AK, Rahman MM, Mitrovic N, Lehmann-Horn F, Lerche H.		Alekov AK	Eur J Neurosci	2001			10.1046/j.0953-816x.2001.01590.x
34045209	Enhanced Synaptic Transmission in the Extended Amygdala and Altered Excitability in an Extended Amygdala to Brainstem Circuit in a Dravet Syndrome Mouse Model	Yan WW, Xia M, Chiang J, Levitt A, Hawkins N, Kearney J, Swanson GT, Chetkovich D, Nobis WP.		Yan WW	eNeuro	2021	PMC8213443		10.1523/ENEURO.0306-20.2021
33842883	Enhancing glucose metabolism via gluconeogenesis is therapeutic in a zebrafish model of Dravet syndrome	Banerji R, Huynh C, Figueroa F, Dinday MT, Baraban SC, Patel M.		Banerji R	Brain Commun	2021	PMC8023476		10.1093/braincomms/fcab004
31882278	Epilepsy and developmental disorders: Next generation sequencing in the clinic	Symonds JD, McTague A.		Symonds JD	Eur J Paediatr Neurol	2020			10.1016/j.ejpn.2019.12.008
25204757	Epilepsy and mental retardation restricted to females: X-linked epileptic infantile encephalopathy of unusual inheritance	Duszyc K, Terczynska I, Hoffman-Zacharska D.		Duszyc K	J Appl Genet	2015			10.1007/s13353-014-0243-8
31578435	Epilepsy and neuropsychiatric comorbidities in mice carrying a recurrent Dravet syndrome SCN1A missense mutation	Ricobaraza A, Mora-Jimenez L, Puerta E, Sanchez-Carpintero R, Mingorance A, Artieda J, Nicolas MJ, Besne G, Bunuales M, Gonzalez-Aparicio M, Sola-Sevilla N, Valencia M, Hernandez-Alcoceba R.		Ricobaraza A	Sci Rep	2019	PMC6775062		10.1038/s41598-019-50627-w
15618878	Epilepsy and sodium channel gene mutations: gain or loss of function?	Yamakawa K.		Yamakawa K	Neuroreport	2005			10.1097/00001756-200501190-00001
18251841	Epilepsy and the long QT syndrome: is there a link?--Commentary on Hindocha et al	Stramba-Badiale M.		Stramba-Badiale M	Epilepsia	2008			10.1111/j.1528-1167.2007.01439_3.x
21269290	Epilepsy and the new cytogenetics	Mulley JC, Mefford HC.		Mulley JC	Epilepsia	2011	PMC3079368	NIHMS252252	10.1111/j.1528-1167.2010.02932.x
33855971	Epilepsy channelopathies go neddy: stabilizing NaV1.1 channels by neddylation	Cannon SC.		Cannon SC	J Clin Invest	2021	PMC8262487		10.1172/JCI148370
33340487	Epilepsy in 2020-a new dawn	Cross JH.		Cross JH	Lancet Neurol	2021			10.1016/S1474-4422(20)30438-5
28058944	Epilepsy in hemiplegic migraine: Genetic mutations and clinical implications	Prontera P, Sarchielli P, Caproni S, Bedetti C, Cupini LM, Calabresi P, Costa C.		Prontera P	Cephalalgia	2018			10.1177/0333102416686347
33839563	Epilepsy in patients with familial hemiplegic migraine	Has?rc? Bay?r BR, Tutkavul K, Eser M, Baykan B.		Has?rc? Bay?r BR	Seizure	2021			10.1016/j.seizure.2021.03.028
25524840	Epilepsy phenotype associated with a chromosome 2q24.3 deletion involving SCN1A: Migrating partial seizures of infancy or atypical Dravet syndrome?	Lim BC, Hwang H, Kim H, Chae JH, Choi J, Kim KJ, Hwang YS, Yum MS, Ko TS.		Lim BC	Epilepsy Res	2015			10.1016/j.eplepsyres.2014.10.008
17129991	Epilepsy with a de novo missense mutation in the sodium channel a1 subunit: a case report	Stefanaki E, Aggelakou V, Orfanou M, Kokori E, Boutoufianakis S.		Stefanaki E	Acta Paediatr	2006			10.1080/08035250600778628
27066544	Epilepsy with auditory features: A heterogeneous clinico-molecular disease	Pippucci T, Licchetta L, Baldassari S, Palombo F, Menghi V, D'Aurizio R, Leta C, Stipa C, Boero G, d'Orsi G, Magi A, Scheffer I, Seri M, Tinuper P, Bisulli F.		Pippucci T	Neurol Genet	2015	PMC4821078		10.1212/NXG.0000000000000005
33453592	Epilepsy with auditory features: Contribution of known genes in 112 patients	Bisulli F, Rinaldi C, Pippucci T, Minardi R, Baldassari S, Zenesini C, Mostacci B, Fanella M, Avoni P, Menghi V, Caporali L, Muccioli L, Tinuper P, Licchetta L.		Bisulli F	Seizure	2021			10.1016/j.seizure.2020.12.015
24014518	Epilepsy, hippocampal sclerosis and febrile seizures linked by common genetic variation around SCN1A	Kasperaviciute D, Catarino CB, Matarin M, Leu C, Novy J, Tostevin A, Leal B, Hessel EV, Hallmann K, Hildebrand MS, Dahl HH, Ryten M, Trabzuni D, Ramasamy A, Alhusaini S, Doherty CP, Dorn T, Hansen J, Kr?mer G, Steinhoff BJ, Zumsteg D, Duncan S, K?lvi?inen RK, Eriksson KJ, Kantanen AM, Pandolfo M, Gruber-Sedlmayr U, Schlachter K, Reinthaler EM, Stogmann E, Zimprich F, Th¨¦atre E, Smith C, O'Brien …		Kasperaviciute D	Brain	2013	PMC3784283		10.1093/brain/awt233
18599753	Epilepsy. When death strikes without warning	Couzin J.		Couzin J	Science	2008			10.1126/science.321.5885.31
17166794	Epilepsy: clinical observations and novel mechanisms	Spencer S.		Spencer S	Lancet Neurol	2007			10.1016/S1474-4422(06)70665-2
18093548	Epilepsy: randomised trials and genetic tribulations	Brodie MJ.		Brodie MJ	Lancet Neurol	2008			10.1016/S1474-4422(07)70301-0
14672992	Epilepsy-associated dysfunction in the voltage-gated neuronal sodium channel SCN1A	Lossin C, Rhodes TH, Desai RR, Vanoye CG, Wang D, Carniciu S, Devinsky O, George AL Jr.		Lossin C	J Neurosci	2003	PMC6740520		10.1523/JNEUROSCI.23-36-11289.2003
14734934	Epileptic encephalopathies with myoclonic seizures in infants and children (severe myoclonic epilepsy and myoclonic-astatic epilepsy)	Guerrini R, Aicardi J.		Guerrini R	J Clin Neurophysiol	2003			10.1097/00004691-200311000-00007
29981888	Establishment of a human induced stem cell line (FUi002-A) from Dravet syndrome patient carrying heterozygous R1525X mutation in SCN1A gene	Tanaka Y, Higurashi N, Shirasu N, Yasunaga S, Moreira KM, Okano H, Hirose S.		Tanaka Y	Stem Cell Res	2018			10.1016/j.scr.2018.06.008
32599563	Establishment of human induced pluripotent stem cells derived from skin cells of a patient with Dravet syndrome	Kimura Y, Tanaka Y, Shirasu N, Yasunaga S, Higurashi N, Hirose S.		Kimura Y	Stem Cell Res	2020			10.1016/j.scr.2020.101857
26841829	Establishment of isogenic iPSCs from an individual with SCN1A mutation mosaicism as a model for investigating neurocognitive impairment in Dravet syndrome	Maeda H, Chiyonobu T, Yoshida M, Yamashita S, Zuiki M, Kidowaki S, Isoda K, Yamakawa K, Morimoto M, Nakahata T, Saito MK, Hosoi H.		Maeda H	J Hum Genet	2016			10.1038/jhg.2016.5
25225143	Etiologies for seizures around the time of vaccination	Verbeek NE, Jansen FE, Vermeer-de Bondt PE, de Kovel CG, van Kempen MJ, Lindhout D, Knoers NV, van der Maas NA, Brilstra EH.		Verbeek NE	Pediatrics	2014			10.1542/peds.2014-0690
27245092	Evaluating the Role of Genetic Variants on first-line antiepileptic drug response in North India: Significance of SCN1A and GABRA1 Gene Variants in Phenytoin Monotherapy and its Serum Drug Levels	Baghel R, Grover S, Kaur H, Jajodia A, Rawat C, Srivastava A, Kushwaha S, Agarwal R, Sharma S, Kukreti R.		Baghel R	CNS Neurosci Ther	2016	PMC6492797		10.1111/cns.12570
26990884	Evaluation of Presumably Disease Causing SCN1A Variants in a Cohort of Common Epilepsy Syndromes	Lal D, Reinthaler EM, Dejanovic B, May P, Thiele H, Lehesjoki AE, Schwarz G, Riesch E, Ikram MA, van Duijn CM, Uitterlinden AG, Hofman A, Steinb?ck H, Gruber-Sedlmayr U, Neophytou B, Zara F, Hahn A; Genetic Commission of the Italian League against Epilepsy; EuroEPINOMICS CoGIE Consortium, Gormley P, Becker F, Weber YG, Cilio MR, Kunz WS, Krause R, Zimprich F, Lemke JR, N¨¹rnberg P, Sander T, Lerc…		Lal D	PLoS One	2016	PMC4798642		10.1371/journal.pone.0150426
18367426	Evaluation of susceptibility loci in an extended pedigree with idiopathic generalized epilepsy	Klein KM, Preisig-M¨¹ller R, Knake S, Hamer HM, Oertel WH, Neubauer BA, Daut J, Rosenow F.		Klein KM	Epileptic Disord	2008			10.1684/epd.2008.0170
25590135	Evaluation of the effect of c.2946+1G>T mutation on splicing in the SCN1A gene	Ben Mahmoud A, Ben Mansour R, Driss F, Baklouti-Gargouri S, Siala O, Mkaouar-Rebai E, Fakhfakh F.		Ben Mahmoud A	Comput Biol Chem	2015			10.1016/j.compbiolchem.2015.01.003
33998858	Evaluation of the Possible Anticonvulsant Effect of ¦¤(9)-Tetrahydrocannabinolic Acid in Murine Seizure Models	Benson MJ, Anderson LL, Low IK, Luo JL, Kevin RC, Zhou C, McGregor IS, Arnold JC.		Benson MJ	Cannabis Cannabinoid Res	2020			10.1089/can.2020.0073
30182801	Evolution of Brain Glucose Metabolic Abnormalities in Children With Epilepsy and SCN1A Gene Variants	Kumar A, Juh¨¢sz C, Luat A, Govil-Dalela T, Behen ME, Hicks MA, Chugani HT.		Kumar A	J Child Neurol	2018			10.1177/0883073818796373
32979291	Excitatory and inhibitory neuron defects in a mouse model of Scn1b-linked EIEE52	Hull JM, O'Malley HA, Chen C, Yuan Y, Denomme N, Bouza AA, Anumonwo C, Lopez-Santiago LF, Isom LL.		Hull JM	Ann Clin Transl Neurol	2020	PMC7664274		10.1002/acn3.51205
30868116	Exome sequencing identifies molecular diagnosis in children with drug-resistant epilepsy	Tsang MH, Leung GK, Ho AC, Yeung KS, Mak CC, Pei SL, Yu MH, Kan AS, Chan KY, Kwong KL, Lee SL, Yung AW, Fung CW, Chung BH.		Tsang MH	Epilepsia Open	2018	PMC6398105		10.1002/epi4.12282
21572417	Exome sequencing in sporadic autism spectrum disorders identifies severe de novo mutations	O'Roak BJ, Deriziotis P, Lee C, Vives L, Schwartz JJ, Girirajan S, Karakoc E, Mackenzie AP, Ng SB, Baker C, Rieder MJ, Nickerson DA, Bernier R, Fisher SE, Shendure J, Eichler EE.		O'Roak BJ	Nat Genet	2011	PMC3115696	NIHMS290937	10.1038/ng.835
23647072	Exome sequencing reveals new causal mutations in children with epileptic encephalopathies	Veeramah KR, Johnstone L, Karafet TM, Wolf D, Sprissler R, Salogiannis J, Barth-Maron A, Greenberg ME, Stuhlmann T, Weinert S, Jentsch TJ, Pazzi M, Restifo LL, Talwar D, Erickson RP, Hammer MF.		Veeramah KR	Epilepsia	2013	PMC3700577	NIHMS462276	10.1111/epi.12201
28333919	Exome sequencing-based molecular autopsy of formalin-fixed paraffin-embedded tissue after sudden death	Bagnall RD, Ingles J, Yeates L, Berkovic SF, Semsarian C.		Bagnall RD	Genet Med	2017			10.1038/gim.2017.15
29745119	Expanding spectrum of SCN1A-related phenotype with novel mutations	H?z-Kurul S, G¨¹rsoy S, Ayano?lu M, Yi? U, Er?al D.		H?z-Kurul S	Turk J Pediatr	2017			10.24953/turkjped.2017.05.010
27857626	Expecting the Unexpected: Lack of In Vivo Network Defects in an Scn1a Model of Dravet Syndrome	Hull JM, Isom LL.		Hull JM	Epilepsy Curr	2016	PMC5106108		10.5698/1535-7511-16.6.408
33911866	Exploring the Hereditary Nature of Migraine	Bron C, Sutherland HG, Griffiths LR.		Bron C	Neuropsychiatr Dis Treat	2021	PMC8075356		10.2147/NDT.S282562
31375088	Exploring the molecular basis of neuronal excitability in a vocal learner	Friedrich SR, Lovell PV, Kaser TM, Mello CV.		Friedrich SR	BMC Genomics	2019	PMC6679542		10.1186/s12864-019-5871-2
17709186	Expression of Nav1.1 in rat retinal AII amacrine cells	Kaneko Y, Watanabe S.		Kaneko Y	Neurosci Lett	2007			10.1016/j.neulet.2007.07.023
23886654	Expression of sodium channel ¦Á subunits 1.1, 1.2 and 1.6 in rat hippocampus after kainic acid-induced epilepsy	Qiao X, Werkman TR, Gorter JA, Wadman WJ, van Vliet EA.		Qiao X	Epilepsy Res	2013			10.1016/j.eplepsyres.2013.06.006
20372843	Expression of voltage-gated sodium channel alpha subunit in human ovarian cancer	Gao R, Shen Y, Cai J, Lei M, Wang Z.		Gao R	Oncol Rep	2010			10.3892/or_00000763
11494332	Expression profiles of voltage-gated Na(+) channel alpha-subunit genes in rat and human prostate cancer cell lines	Diss JK, Archer SN, Hirano J, Fraser SP, Djamgoz MB.		Diss JK	Prostate	2001			10.1002/pros.1095
18381897	Extensive variation between inbred mouse strains due to endogenous L1 retrotransposition	Akagi K, Li J, Stephens RM, Volfovsky N, Symer DE.		Akagi K	Genome Res	2008	PMC2413154	NIHMS46177	10.1101/gr.075770.107
20477842	Failure to detect association between polymorphisms of the sodium channel gene SCN1A and febrile seizures in Chinese patients with epilepsy	Zhang C, Wong V, Ng PW, Lui CH, Sin NC, Wong KS, Baum L, Kwan P.		Zhang C	Epilepsia	2010			10.1111/j.1528-1167.2010.02587.x
22578703	Failure to find association between febrile seizures and SCN1A rs3812718 polymorphism in south Indian patients with mesial temporal lobe epilepsy and hippocampal sclerosis	Balan S, Vellichirammal NN, Banerjee M, Radhakrishnan K.		Balan S	Epilepsy Res	2012			10.1016/j.eplepsyres.2012.04.009
23203776	Familial and sporadic hemiplegic migraine: diagnosis and treatment	Pelzer N, Stam AH, Haan J, Ferrari MD, Terwindt GM.		Pelzer N	Curr Treat Options Neurol	2013			10.1007/s11940-012-0208-3
20301562	Familial Hemiplegic Migraine	Jen JC.		Jen JC	GeneReviews(?)	1993
24646837	Familial hemiplegic migraine due to L263V SCN1A mutation: discordance for epilepsy between two kindreds from Douro Valley	Barros J, Ferreira A, Brand?o AF, Lemos C, Correia F, Dam¨¢sio J, Tuna A, Sequeiros J, Coutinho P, Alonso I, Pereira-Monteiro J.		Barros J	Cephalalgia	2014			10.1177/0333102414527015
30498473	Familial Hemiplegic Migraine Type 3 (FHM3) With an SCN1A Mutation in a Chinese Family: A Case Report	Shao N, Zhang H, Wang X, Zhang W, Yu M, Meng H.		Shao N	Front Neurol	2018	PMC6249337		10.3389/fneur.2018.00976
32549268	Familial Hemiplegic Migraine with an ATP1A4 Mutation: Clinical Spectrum and Carbamazepine Efficacy	Coppola G, Pastorino GMG, Vetri L, D'Onofrio F, Operto FF.		Coppola G	Brain Sci	2020	PMC7349335		10.3390/brainsci10060372
27818813	Familial Hemiplegic Migraine with Severe Attacks: A New Report with ATP1A2 Mutation	Mart¨ªnez E, Moreno R, L¨®pez-Mesonero L, Vidriales I, Ruiz M, Guerrero AL, Teller¨ªa JJ.		Mart¨ªnez E	Case Rep Neurol Med	2016	PMC5081966		10.1155/2016/3464285
20384724	Familial neonatal seizures with intellectual disability caused by a microduplication of chromosome 2q24.3	Heron SE, Scheffer IE, Grinton BE, Eyre H, Oliver KL, Bain S, Berkovic SF, Mulley JC.		Heron SE	Epilepsia	2010			10.1111/j.1528-1167.2010.02558.x
17054684	Familial occurrence of febrile seizures and epilepsy in severe myoclonic epilepsy of infancy (SMEI) patients with SCN1A mutations	Mancardi MM, Striano P, Gennaro E, Madia F, Paravidino R, Scapolan S, Dalla Bernardina B, Bertini E, Bianchi A, Capovilla G, Darra F, Elia M, Freri E, Gobbi G, Granata T, Guerrini R, Pantaleoni C, Parmeggiani A, Romeo A, Santucci M, Vecchi M, Veggiotti P, Vigevano F, Pistorio A, Gaggero R, Zara F.		Mancardi MM	Epilepsia	2006			10.1111/j.1528-1167.2006.00641.x
12773292	Familial severe myoclonic epilepsy of infancy: truncation of Nav1.1 and genetic heterogeneity	Gennaro E, Veggiotti P, Malacarne M, Madia F, Cecconi M, Cardinali S, Cassetti A, Cecconi I, Bertini E, Bianchi A, Gobbi G, Zara F.		Gennaro E	Epileptic Disord	2003
26362388	Familial temporal lobe epilepsy due to focal cortical dysplasia type IIIa	Fabera P, Krijtova H, Tomasek M, Krysl D, Zamecnik J, Mohapl M, Jiruska P, Marusic P.		Fabera P	Seizure	2015			10.1016/j.seizure.2015.07.014
28330972	Fatal Cerebral Edema With Status Epilepticus in Children With Dravet Syndrome: Report of 5 Cases	Myers KA, McMahon JM, Mandelstam SA, Mackay MT, Kalnins RM, Leventer RJ, Scheffer IE.		Myers KA	Pediatrics	2017			10.1542/peds.2016-1933
33238377	Fatal Status Epilepticus in Dravet Syndrome	De Liso P, Pironi V, Mastrangelo M, Battaglia D, Craiu D, Trivisano M, Specchio N, Nabbout R, Vigevano F.		De Liso P	Brain Sci	2020	PMC7700506		10.3390/brainsci10110889
23066759	Febrile infection-related epilepsy syndrome (FIRES) is not caused by SCN1A, POLG, PCDH19 mutations or rare copy number variations	Appenzeller S, Helbig I, Stephani U, H?usler M, Kluger G, Bungeroth M, M¨¹ller S, Kuhlenb?umer G, van Baalen A.		Appenzeller S	Dev Med Child Neurol	2012			10.1111/j.1469-8749.2012.04435.x
22386634	Febrile infection-related epilepsy syndrome is not caused by SCN1A mutations	Carranza Rojo D, Harvey AS, Iona X, Dibbens LM, Damiano JA, Arsov T, Gill D, Freeman JL, Leventer RJ, Vincent A, Berkovic SF, McMahon JM, Scheffer IE.		Carranza Rojo D	Epilepsy Res	2012			10.1016/j.eplepsyres.2012.02.007
25917466	Febrile seizures and genetic epilepsy with febrile seizures plus (GEFS+)	Camfield P, Camfield C.		Camfield P	Epileptic Disord	2015			10.1684/epd.2015.0737
20367785	Febrile seizures, genetic (generalized) epilepsy with febrile seizures plus, and Dravet's syndrome	Scanlon A, Cook SS.		Scanlon A	J Spec Pediatr Nurs	2010			10.1111/j.1744-6155.2010.00230.x
22014581	Fever as a seizure precipitant factor in Panayiotopoulos syndrome: a clinical and genetic study	Cordelli DM, Aldrovandi A, Gentile V, Garone C, Conti S, Aceti A, Gennaro E, Zara F, Franzoni E.		Cordelli DM	Seizure	2012			10.1016/j.seizure.2011.09.013
23891806	FGF14 localization and organization of the axon initial segment	Xiao M, Bosch MK, Nerbonne JM, Ornitz DM.		Xiao M	Mol Cell Neurosci	2013	PMC3791165	NIHMS510064	10.1016/j.mcn.2013.07.008
27830185	FHF1 (FGF12) epileptic encephalopathy	Al-Mehmadi S, Splitt M; For DDD Study group*, Ramesh V, DeBrosse S, Dessoffy K, Xia F, Yang Y, Rosenfeld JA, Cossette P, Michaud JL, Hamdan FF, Campeau PM, Minassian BA; For CENet Study group?.		Al-Mehmadi S	Neurol Genet	2016	PMC5087254		10.1212/NXG.0000000000000115
19007941	FHM3 in familial hemiplegic migraine is more resistant to mutation than FHM1 and FHM2	Wiwanitkit V.		Wiwanitkit V	J Neurol Sci	2009			10.1016/j.jns.2008.10.012
27768696	Fine Mapping of a Dravet Syndrome Modifier Locus on Mouse Chromosome 5 and Candidate Gene Analysis by RNA-Seq	Hawkins NA, Zachwieja NJ, Miller AR, Anderson LL, Kearney JA.		Hawkins NA	PLoS Genet	2016	PMC5074504		10.1371/journal.pgen.1006398
31880072	First FHM3 mouse model shows spontaneous cortical spreading depolarizations	Jansen NA, Dehghani A, Linssen MML, Breukel C, Tolner EA, van den Maagdenberg AMJM.		Jansen NA	Ann Clin Transl Neurol	2020	PMC6952313		10.1002/acn3.50971
19220312	First mutation in the voltage-gated Nav1.1 subunit gene SCN1A with co-occurring familial hemiplegic migraine and epilepsy	Castro MJ, Stam AH, Lemos C, de Vries B, Vanmolkot KR, Barros J, Terwindt GM, Frants RR, Sequeiros J, Ferrari MD, Pereira-Monteiro JM, van den Maagdenberg AM.		Castro MJ	Cephalalgia	2009			10.1111/j.1468-2982.2008.01721.x
30060894	First report on the association of SCN1A mutation, childhood schizophrenia and autism spectrum disorder without epilepsy	Papp-Hertelendi R, T¨¦nyi T, Hadzsiev K, Hau L, Benyus Z, Cs¨¢bi G.		Papp-Hertelendi R	Psychiatry Res	2018			10.1016/j.psychres.2018.07.028
27197941	Five-year extended follow-up status of 10 patients with Dravet syndrome treated with fenfluramine	Ceulemans B, Schoonjans AS, Marchau F, Paelinck BP, Lagae L.		Ceulemans B	Epilepsia	2016			10.1111/epi.13407
32190912	Focal and generalized seizure activity after local hippocampal or cortical ablation of Na(V) 1.1 channels in mice	Jansen NA, Dehghani A, Breukel C, Tolner EA, van den Maagdenberg AMJM.		Jansen NA	Epilepsia	2020	PMC7216883		10.1111/epi.16482
34106054	Focal epilepsy due to de novo SCN1A mutation	Laur D, Dozi¨¨res-Puyravel B, Il¨¦a A, Nava C, Delano? C, Nasser H, Le Guern E, Auvin S.		Laur D	Epileptic Disord	2021			10.1684/epd.2021.1285
32538476	Focal epilepsy in SCN1A-mutation carrying patients: is there a role for epilepsy surgery?	Vezyroglou A, Varadkar S, Bast T, Hirsch E, Strobl K, Harvey AS; Epilepsy Surgery in SCN1A Study Group, Scheffer IE, Sisodiya SM, Cross JH.		Vezyroglou A	Dev Med Child Neurol	2020			10.1111/dmcn.14588
18330841	Focal epilepsy resulting from a de novo SCN1A mutation	Okumura A, Kurahashi H, Hirose S, Okawa N, Watanabe K.		Okumura A	Neuropediatrics	2007			10.1055/s-2008-1062703
23318929	Focal Scn1a knockdown induces cognitive impairment without seizures	Bender AC, Natola H, Ndong C, Holmes GL, Scott RC, Lenck-Santini PP.		Bender AC	Neurobiol Dis	2013	PMC3628954	NIHMS435550	10.1016/j.nbd.2012.12.021
27777328	Focal Seizures in Patients With SCN1A Mutations	McDonald CL, Saneto RP, Carmant L, Sotero de Menezes MA.		McDonald CL	J Child Neurol	2017			10.1177/0883073816672379
20484682	Four generations of epilepsy caused by an inherited microdeletion of the SCN1A gene	Suls A, Velizarova R, Yordanova I, Deprez L, Van Dyck T, Wauters J, Guergueltcheva V, Claes LR, Kremensky I, Jordanova A, De Jonghe P.		Suls A	Neurology	2010			10.1212/WNL.0b013e3181e62088
20110217	Four novel SCN1A mutations in Turkish patients with severe myoclonic epilepsy of infancy (SMEI)	Arlier Z, Bayri Y, Kolb LE, Erturk O, Ozturk AK, Bayrakli F, Bilguvar K, Moliterno JA, Dervent A, Demirbilek V, Yalcinkaya C, Korkmaz B, Tuysuz B, Gunel M.		Arlier Z	J Child Neurol	2010			10.1177/0883073809357241
31439621	Fragile Females: Case Series of Epilepsy in Girls With FMR1 Disruption	Myers KA, van 't Hof FNG, Sadleir LG, Legault G, Simard-Tremblay E, Amor DJ, Scheffer IE.		Myers KA	Pediatrics	2019			10.1542/peds.2019-0599
11940708	Frequent mutations of SCN1A in severe myoclonic epilepsy in infancy	Sugawara T, Mazaki-Miyazaki E, Fukushima K, Shimomura J, Fujiwara T, Hamano S, Inoue Y, Yamakawa K.		Sugawara T	Neurology	2002			10.1212/wnl.58.7.1122
26188943	From focal epilepsy to Dravet syndrome--Heterogeneity of the phenotype due to SCN1A mutations of the p.Arg1596 amino acid residue in the Nav1.1 subunit	Hoffman-Zacharska D, Szczepanik E, Terczynska I, Goszczanska-Ciuchta A, Zalewska-Miszkurka Z, Tataj R, Bal J.		Hoffman-Zacharska D	Neurol Neurochir Pol	2015			10.1016/j.pjnns.2015.06.006
27817982	From genotype to phenotype in Dravet disease	Gataullina S, Dulac O.		Gataullina S	Seizure	2017			10.1016/j.seizure.2016.10.014
25725421	Functional and structural deficits of the dentate gyrus network coincide with emerging spontaneous seizures in an Scn1a mutant Dravet Syndrome model during development	Tsai MS, Lee ML, Chang CY, Fan HH, Yu IS, Chen YT, You JY, Chen CY, Chang FC, Hsiao JH, Khorkova O, Liou HH, Yanagawa Y, Lee LJ, Lin SW.		Tsai MS	Neurobiol Dis	2015			10.1016/j.nbd.2015.02.010
12576172	Functional characterization of the D188V mutation in neuronal voltage-gated sodium channel causing generalized epilepsy with febrile seizures plus (GEFS)	Cossette P, Loukas A, Lafreni¨¨re RG, Rochefort D, Harvey-Girard E, Ragsdale DS, Dunn RJ, Rouleau GA.		Cossette P	Epilepsy Res	2003			10.1016/s0920-1211(02)00259-0
11567038	Functional effects of two voltage-gated sodium channel mutations that cause generalized epilepsy with febrile seizures plus type 2	Spampanato J, Escayg A, Meisler MH, Goldin AL.		Spampanato J	J Neurosci	2001	PMC6762922		10.1523/JNEUROSCI.21-19-07481.2001
24623842	GABRA1 and STXBP1: novel genetic causes of Dravet syndrome	Carvill GL, Weckhuysen S, McMahon JM, Hartmann C, M?ller RS, Hjalgrim H, Cook J, Geraghty E, O'Roak BJ, Petrou S, Clarke A, Gill D, Sadleir LG, Muhle H, von Spiczak S, Nikanorova M, Hodgson BL, Gazina EV, Suls A, Shendure J, Dibbens LM, De Jonghe P, Helbig I, Berkovic SF, Scheffer IE, Mefford HC.		Carvill GL	Neurology	2014	PMC4001207		10.1212/WNL.0000000000000291
34086081	Gabra2 is a genetic modifier of Dravet syndrome in mice	Hawkins NA, Nomura T, Duarte S, Barse L, Williams RW, Homanics GE, Mulligan MK, Contractor A, Kearney JA.		Hawkins NA	Mamm Genome	2021	PMC8458207		10.1007/s00335-021-09877-1
32418750	GABRG2 Deletion Linked to Genetic Epilepsy with Febrile Seizures Plus Affects the Expression of GABA(A) Receptor Subunits and Other Genes at Different Temperatures	Li X, Guo S, Liu K, Zhang C, Chang H, Yang W, Rong S, Hu Q, Cui J, Wang F, Sun T.		Li X	Neuroscience	2020			10.1016/j.neuroscience.2020.04.049
30038559	Gain of Function for the SCN1A/hNa(v)1.1-L1670W Mutation Responsible for Familial Hemiplegic Migraine	Dhifallah S, Lancaster E, Merrill S, Leroudier N, Mantegazza M, Cest¨¨le S.		Dhifallah S	Front Mol Neurosci	2018	PMC6046441		10.3389/fnmol.2018.00232
29986598	Gain of function of sporadic/familial hemiplegic migraine-causing SCN1A mutations: Use of an optimized cDNA	Bertelli S, Barbieri R, Pusch M, Gavazzo P.		Bertelli S	Cephalalgia	2019			10.1177/0333102418788336
31582194	Gait abnormalities in people with Dravet syndrome: A cross-sectional multi-center study	Di Marco R, Hallemans A, Bellon G, Ragona F, Piazza E, Granata T, Ceulemans B, Schoonjans AS, Van de Walle P, Darra F, Dalla Bernardina B, Vecchi M, Sawacha Z, Scarpa B, Masiero S, Benedetti MG, Del Felice A.		Di Marco R	Eur J Paediatr Neurol	2019			10.1016/j.ejpn.2019.09.010
27816501	GAPDH-mediated posttranscriptional regulations of sodium channel Scn1a and Scn3a genes under seizure and ketogenic diet conditions	Lin GW, Lu P, Zeng T, Tang HL, Chen YH, Liu SJ, Gao MM, Zhao QH, Yi YH, Long YS.		Lin GW	Neuropharmacology	2017			10.1016/j.neuropharm.2016.11.002
34181986	Gastrointestinal Symptoms and Channelopathy-Associated Epilepsy	Beck VC, Isom LL, Berg AT.		Beck VC	J Pediatr	2021	PMC8478841	NIHMS1723721	10.1016/j.jpeds.2021.06.034
18175077	GEFS+ is not related to the most common mutations of SCN1B, SCN1A and GABRG2 in two Tunisian families	Mrabet H, Belhedi N, Bouchlaka S, El Gaaied A, Mrabet A.		Mrabet H	Neurol Sci	2007			10.1007/s10072-007-0844-7
17884755	GEFS+ where focal seizures evolve from generalized spike wave: video-EEG study of two children	Deng YH, Berkovic SF, Scheffer IE.		Deng YH	Epileptic Disord	2007			10.1684/epd.2007.0126
23752739	Gender-specific profiling in SCN1A polymorphisms and time-to-recurrence in patients with stage II/III colorectal cancer treated with adjuvant 5-fluoruracil chemotherapy	Benhaim L, Gerger A, Bohanes P, Paez D, Wakatsuki T, Yang D, Labonte MJ, Ning Y, El-Khoueiry R, Loupakis F, Zhang W, Laurent-Puig P, Lenz HJ.		Benhaim L	Pharmacogenomics J	2014			10.1038/tpj.2013.21
34163418	Gene and Phenotype Expansion of Unexplained Early Infantile Epileptic Encephalopathy	Liu X, Shen Q, Zheng G, Guo H, Lu X, Wang X, Yang X, Cao Z, Chen J.		Liu X	Front Neurol	2021	PMC8215605		10.3389/fneur.2021.633637
30347190	Gene expression profiling in a mouse model of Dravet syndrome	Hawkins NA, Calhoun JD, Huffman AM, Kearney JA.		Hawkins NA	Exp Neurol	2019	PMC6287761	NIHMS1510826	10.1016/j.expneurol.2018.10.010
26544041	Gene Mutation Analysis in 253 Chinese Children with Unexplained Epilepsy and Intellectual/Developmental Disabilities	Zhang Y, Kong W, Gao Y, Liu X, Gao K, Xie H, Wu Y, Zhang Y, Wang J, Gao F, Wu X, Jiang Y.		Zhang Y	PLoS One	2015	PMC4636363		10.1371/journal.pone.0141782
30776697	Gene mutational analysis in a cohort of Chinese children with unexplained epilepsy: Identification of a new KCND3 phenotype and novel genes causing Dravet syndrome	Wang J, Wen Y, Zhang Q, Yu S, Chen Y, Wu X, Zhang Y, Bao X.		Wang J	Seizure	2019			10.1016/j.seizure.2019.01.025
27781031	Gene Panel Testing in Epileptic Encephalopathies and Familial Epilepsies	M?ller RS, Larsen LH, Johannesen KM, Talvik I, Talvik T, Vaher U, Miranda MJ, Farooq M, Nielsen JE, Svendsen LL, Kjelgaard DB, Linnet KM, Hao Q, Uldall P, Frangu M, Tommerup N, Baig SM, Abdullah U, Born AP, Gellert P, Nikanorova M, Olofsson K, Jepsen B, Marjanovic D, Al-Zehhawi LI, Pe?alva SJ, Krag-Olsen B, Brusgaard K, Hjalgrim H, Rubboli G, Pal DK, Dahl HA.		M?ller RS	Mol Syndromol	2016	PMC5073625		10.1159/000448369
17438605	Gene symbol: SCN1A	Combi R, Grioni D, Tenchini ML, Bertolini M, Tredici G, Dalpra L.		Combi R	Hum Genet	2007
17438620	Gene symbol: SCN1A	Combi R, Grioni D, Tenchini ML, Bertolini M, Tredici G, Dalpra L.		Combi R	Hum Genet	2007
18846618	Gene symbol: SCN1A. Disease: Generalized epilepsy with febrile seizures plus	Sun H, Zhang Y, Liang J, Liu X, Ma X, Wu H, Xu K, Qin J, Qi Y, Wu X.		Sun H	Hum Genet	2008
15861558	Gene variants affect response to antiepileptic drugs	Senior K.		Senior K	Lancet Neurol	2005			10.1016/s1474-4422(05)70066-1
22011963	Generalised epilepsy with febrile seizures plus (GEFS(+)): molecular analysis in a restricted area	Polizzi A, Incorpora G, Pavone P, Ruggieri M, Annesi G, Gambardella A, Pavone L, Quattrone A.		Polizzi A	Childs Nerv Syst	2012			10.1007/s00381-011-1592-9
23248692	Generalized epilepsy with febrile seizure plus (GEFS+) spectrum: Novel de novo mutation of SCN1A detected in a Malaysian patient	Tan EH, Yusoff AA, Abdullah JM, Razak SA.		Tan EH	J Pediatr Neurosci	2012	PMC3519070		10.4103/1817-1745.102575
20452746	Generalized epilepsy with febrile seizures plus (GEFS+) spectrum: clinical manifestations and SCN1A mutations in Indonesian patients	Herini ES, Gunadi, Harahap IS, Yusoff S, Morikawa S, Patria SY, Nishimura N, Sunartini, Sutaryo, Takada S, Matsuo M, Nishio H.		Herini ES	Epilepsy Res	2010			10.1016/j.eplepsyres.2010.04.003
14738422	Generalized epilepsy with febrile seizures plus (GEFS+): clinical spectrum in seven Italian families unrelated to SCN1A, SCN1B, and GABRG2 gene mutations	Bonanni P, Malcarne M, Moro F, Veggiotti P, Buti D, Ferrari AR, Parrini E, Mei D, Volzone A, Zara F, Heron SE, Bordo L, Marini C, Guerrini R.		Bonanni P	Epilepsia	2004			10.1111/j.0013-9580.2004.04303.x
12535936	Generalized epilepsy with febrile seizures plus type 2 mutation W1204R alters voltage-dependent gating of Na(v)1.1 sodium channels	Spampanato J, Escayg A, Meisler MH, Goldin AL.		Spampanato J	Neuroscience	2003			10.1016/s0306-4522(02)00698-x
11591834	Generalized epilepsy with febrile seizures plus: further heterogeneity in a large family	Lerche H, Weber YG, Baier H, Jurkat-Rott K, Kraus de Camargo O, Ludolph AC, Bode H, Lehmann-Horn F.		Lerche H	Neurology	2001			10.1212/wnl.57.7.1191
20117752	Generalized epilepsy with febrile seizures plus: novel SCN1A mutation	Dimova PS, Yordanova I, Bojinova V, Jordanova A, Kremenski I.		Dimova PS	Pediatr Neurol	2010			10.1016/j.pediatrneurol.2009.09.007
17629415	Generalized epilepsy with febrile seizures plus-associated sodium channel beta1 subunit mutations severely reduce beta subunit-mediated modulation of sodium channel function	Xu R, Thomas EA, Gazina EV, Richards KL, Quick M, Wallace RH, Harkin LA, Heron SE, Berkovic SF, Scheffer IE, Mulley JC, Petrou S.		Xu R	Neuroscience	2007			10.1016/j.neuroscience.2007.05.038
21335542	Generalized periodic epileptiform discharges in a child with Dravet syndrome	Moseley BD, Wirrell EC, Nickels K.		Moseley BD	J Child Neurol	2011			10.1177/0883073810394182
32544858	Generation of corrected-hiPSC (USTCi001-A-1) from epilepsy patient iPSCs using TALEN-mediated editing of the SCN1A gene	Zhao H, He L, Li S, Huang H, Tang F, Han X, Lin Z, Tian C, Huang R, Zhou P, Huang J, Deng S, Li Z.		Zhao H	Stem Cell Res	2020			10.1016/j.scr.2020.101864
29453127	Generation of D1-1 TALEN isogenic control cell line from Dravet syndrome patient iPSCs using TALEN-mediated editing of the SCN1A gene	Tanaka Y, Sone T, Higurashi N, Sakuma T, Suzuki S, Ishikawa M, Yamamoto T, Mitsui J, Tsuji H, Okano H, Hirose S.		Tanaka Y	Stem Cell Res	2018			10.1016/j.scr.2018.01.036
33370868	Generation of iPSC lines from two patients affected by febrile seizure due to inherited missense mutation in SCN1A gene	Scalise S, Scaramuzzino L, Lucchino V, Esposito C, Malatesta P, Grillone K, Perrotti N, Cuda G, Parrotta EI.		Scalise S	Stem Cell Res	2020			10.1016/j.scr.2020.102083
34247112	Generation of SCN1A Knock out induced pluripotent stem cell (iPSC) line	Shan W, Yang X, Ren Q, Wang Q.		Shan W	Stem Cell Res	2021			10.1016/j.scr.2021.102452
24953032	Generation of the SCN1A epilepsy mutation in hiPS cells using the TALEN technique	Chen W, Liu J, Zhang L, Xu H, Guo X, Deng S, Liu L, Yu D, Chen Y, Li Z.		Chen W	Sci Rep	2014	PMC4066246		10.1038/srep05404
31400703	Generation of three human induced pluripotent stem cell (iPSC) lines from three patients with Dravet syndrome carrying distinct SCN1A gene mutations	Schuster J, Fatima A, Sobol M, Norradin FH, Laan L, Dahl N.		Schuster J	Stem Cell Res	2019			10.1016/j.scr.2019.101523
16550559	Genes and loci involved in febrile seizures and related epilepsy syndromes	Audenaert D, Van Broeckhoven C, De Jonghe P.		Audenaert D	Hum Mutat	2006			10.1002/humu.20279
11579434	Genes and mutations in idiopathic epilepsy	Steinlein OK.		Steinlein OK	Am J Med Genet	2001			10.1002/ajmg.1571
22787626	Genes in infantile epileptic encephalopathies	Depienne C, Gourfinkel-An I, Baulac S, LeGuern E.		Depienne C	Jasper's Basic Mechanisms of the Epilepsies	2012
22196487	Genes of early-onset epileptic encephalopathies: from genotype to phenotype	Mastrangelo M, Leuzzi V.		Mastrangelo M	Pediatr Neurol	2012			10.1016/j.pediatrneurol.2011.11.003
18644040	Genetic analysis of 27 Spanish patients with hemiplegic migraine, basilar-type migraine and childhood periodic syndromes	Cuenca-Le¨®n E, Corominas R, Fern¨¤ndez-Castillo N, Volpini V, Del Toro M, Roig M, Macaya A, Cormand B.		Cuenca-Le¨®n E	Cephalalgia	2008			10.1111/j.1468-2982.2008.01645.x
32336485	Genetic and clinical variations in a Norwegian sample diagnosed with Rett syndrome	Henriksen MW, Breck H, Sejersted Y, Diseth T, von Tetzchner S, Paus B, Skjeldal OH.		Henriksen MW	Brain Dev	2020			10.1016/j.braindev.2020.03.008
31009440	Genetic and phenotypic characteristics of SCN1A-related epilepsy in Chinese children	Fang ZX, Hong SQ, Li TS, Wang J, Xie LL, Han W, Jiang L.		Fang ZX	Neuroreport	2019			10.1097/WNR.0000000000001259
25281316	Genetic background modulates impaired excitability of inhibitory neurons in a mouse model of Dravet syndrome	Rubinstein M, Westenbroek RE, Yu FH, Jones CJ, Scheuer T, Catterall WA.		Rubinstein M	Neurobiol Dis	2015	PMC4254180	NIHMS632406	10.1016/j.nbd.2014.09.017
24399675	Genetic background of febrile seizures	Saghazadeh A, Mastrangelo M, Rezaei N.		Saghazadeh A	Rev Neurosci	2014			10.1515/revneuro-2013-0053
28565819	Genetic basis of pediatric epilepsy syndromes	Zhang D, Liu X, Deng X.		Zhang D	Exp Ther Med	2017	PMC5443213		10.3892/etm.2017.4267
16866710	Genetic biomarkers for migraine	De Vries B, Haan J, Frants RR, Van den Maagdenberg AM, Ferrari MD.		De Vries B	Headache	2006			10.1111/j.1526-4610.2006.00499.x
19154521	Genetic calcium signaling abnormalities in the central nervous system: seizures, migraine, and autism	Gargus JJ.		Gargus JJ	Ann N Y Acad Sci	2009			10.1111/j.1749-6632.2008.03572.x
34568804	Genetic cause of epilepsy in a Greek cohort of children and young adults with heterogeneous epilepsy syndromes	Zaganas I, Vorgia P, Spilioti M, Mathioudakis L, Raissaki M, Ilia S, Giorgi M, Skoula I, Chinitrakis G, Michaelidou K, Paraskevoulakos E, Grafakou O, Kariniotaki C, Psyllou T, Zafeiris S, Tzardi M, Briassoulis G, Dinopoulos A, Mitsias P, Evangeliou A.		Zaganas I	Epilepsy Behav Rep	2021	PMC8449081		10.1016/j.ebr.2021.100477
26060908	Genetic Causes of Generalized Epilepsies	Helbig I.		Helbig I	Semin Neurol	2015			10.1055/s-0035-1552922
25087078	Genetic determinants of common epilepsies: a meta-analysis of genome-wide association studies	International League Against Epilepsy Consortium on Complex Epilepsies. Electronic address: epilepsy-austin@unimelb.edu.au.		International League Against Epilepsy Consortium on Complex Epilepsies. Electronic address: epilepsy-austin@unimelb.edu.au	Lancet Neurol	2014	PMC4189926	NIHMS622919	10.1016/S1474-4422(14)70171-1
34395220	Genetic Diagnosis in Children with Epilepsy and Developmental Disorders by Targeted Gene Panel Analysis in a Developing Country	Rahman MM, Fatema K.		Rahman MM	J Epilepsy Res	2021	PMC8357555		10.14581/jer.21004
33067208	Genetic Diagnosis of Dravet Syndrome Using Next Generation Sequencing-Based Epilepsy Gene Panel Testing	Lee J, Lee C, Park WY, Lee J.		Lee J	Ann Clin Lab Sci	2020
22147323	Genetic diagnosis of severe myoclonic epilepsy of infancy (Dravet syndrome) with SCN1A mutations in the Hong Kong Chinese patients	Mak CM, Chan KY, Yau EK, Chen SP, Siu WK, Law CY, Lam CW, Chan AY.		Mak CM	Hong Kong Med J	2011
25874779	Genetic epilepsies with febrile seizures plus: clinical spectrum of Polish patients with SCN1A mutation - preliminary report	Terczy¨½ska I, Szczepanik E, Duszyc K, G¨®rka P, Tataj R, Hoffman-Zacharska D.		Terczy¨½ska I	Dev Period Med	2014
24571113	Genetic epileptic encephalopathies: is all written into the DNA?	Striano P, de Jonghe P, Zara F.		Striano P	Epilepsia	2013			10.1111/epi.12419
17981785	Genetic etiology of new forms of familial epilepsy	Wang X, Lu Y.		Wang X	Front Biosci	2008			10.2741/2917
33761731	Genetic factors and the risk of drug-resistant epilepsy in young children with epilepsy and neurodevelopment disability: A prospective study and updated meta-analysis	Lin CH, Chou IC, Hong SY.		Lin CH	Medicine (Baltimore)	2021	PMC8049163		10.1097/MD.0000000000025277
20064729	Genetic factors associated with drug-resistance of epilepsy: relevance of stratification by patient age and aetiology of epilepsy	S¨¢nchez MB, Herranz JL, Leno C, Arteaga R, Oterino A, Valdiz¨¢n EM, Nicol¨¢s JM, Ad¨ªn J, Armijo JA.		S¨¢nchez MB	Seizure	2010			10.1016/j.seizure.2009.12.004
26423924	Genetic investigation of sudden unexpected death in epilepsy cohort by panel target resequencing	Coll M, Allegue C, Partemi S, Mates J, Del Olmo B, Campuzano O, Pascali V, Iglesias A, Striano P, Oliva A, Brugada R.		Coll M	Int J Legal Med	2016			10.1007/s00414-015-1269-0
30078767	Genetic literacy series: genetic epilepsy with febrile seizures plus	Myers KA, Scheffer IE, Berkovic SF; ILAE Genetics Commission.		Myers KA	Epileptic Disord	2018			10.1684/epd.2018.0985
17765802	Genetic polymorphisms and idiopathic generalized epilepsies	Lucarini N, Verrotti A, Napolioni V, Bosco G, Curatolo P.		Lucarini N	Pediatr Neurol	2007			10.1016/j.pediatrneurol.2007.06.001
27228124	Genetic polymorphisms and the adequacy of brain stimulation: state of the art	Saghazadeh A, Esfahani SA, Rezaei N.		Saghazadeh A	Expert Rev Neurother	2016			10.1080/14737175.2016.1194202
15805193	Genetic predictors of the maximum doses patients receive during clinical use of the anti-epileptic drugs carbamazepine and phenytoin	Tate SK, Depondt C, Sisodiya SM, Cavalleri GL, Schorge S, Soranzo N, Thom M, Sen A, Shorvon SD, Sander JW, Wood NW, Goldstein DB.		Tate SK	Proc Natl Acad Sci U S A	2005	PMC556232		10.1073/pnas.0407346102
20602612	Genetic profile of patients with epilepsy on first-line antiepileptic drugs and potential directions for personalized treatment	Grover S, Gourie-Devi M, Baghel R, Sharma S, Bala K, Gupta M, Narayanasamy K, Varma B, Gupta M, Kaur K, Talwar P, Kaur H, Giddaluru S, Sharma A, Brahmachari SK, Indian Genome Variation Consortium, Kukreti R.		Grover S	Pharmacogenomics	2010			10.2217/pgs.10.62
17927801	Genetic screening of Scandinavian families with febrile seizures and epilepsy or GEFS+	Selmer KK, Egeland T, Solaas MH, Nakken KO, Kjeldsen MJ, Friis ML, Brandal K, Corey LA, Undlien DE.		Selmer KK	Acta Neurol Scand	2008			10.1111/j.1600-0404.2007.00941.x
19236456	Genetic screening of two Tunisian families with generalized epilepsy with febrile seizures plus	Fendri-Kriaa N, Kammoun F, Rebai A, Kolsi D, Hadj Salem I, Fakhfakh F, Triki C.		Fendri-Kriaa N	Eur J Neurol	2009			10.1111/j.1468-1331.2009.02570.x
20675100	Genetic seizure susceptibility underlying acute encephalopathies in childhood	Kobayashi K, Ouchida M, Okumura A, Maegaki Y, Nishiyama I, Matsui H, Ohtsuka Y, Ohmori I.		Kobayashi K	Epilepsy Res	2010			10.1016/j.eplepsyres.2010.07.005
26747084	Genetic studies of Polish migraine patients: screening for causative mutations in four migraine-associated genes	Domitrz I, Kosiorek M, ?ekanowski C, Kami¨½ska A.		Domitrz I	Hum Genomics	2016	PMC4706665		10.1186/s40246-015-0057-8
23186389	Genetic testing improves care for infantile-onset epilepsy: the story of SCN1A	Berg AT.		Berg AT	Dev Med Child Neurol	2013			10.1111/dmcn.12037
30660939	Genetic testing in a cohort of patients with potential epilepsy with myoclonic-atonic seizures	Angione K, Eschbach K, Smith G, Joshi C, Demarest S.		Angione K	Epilepsy Res	2019			10.1016/j.eplepsyres.2019.01.008
23250121	Genetic testing of epileptic encephalopathies of infancy: an approach	Sharma S, Prasad AN.		Sharma S	Can J Neurol Sci	2013			10.1017/s0317167100012889
27651130	Genetic Testing Requires NGS and Sanger Methodologies	Jennings LJ, Kirschmann D.		Jennings LJ	Pediatr Neurol Briefs	2016	PMC5027035		10.15844/pedneurbriefs-30-9-1
21881118	Genetic variants and susceptibility to neurological complications following West Nile virus infection	Loeb M, Eskandarian S, Rupp M, Fishman N, Gasink L, Patterson J, Bramson J, Hudson TJ, Lemire M.		Loeb M	J Infect Dis	2011	PMC3203390		10.1093/infdis/jir493
24275226	Genetic variants associated with development of TMD and its intermediate phenotypes: the genetic architecture of TMD in the OPPERA prospective cohort study	Smith SB, Mir E, Bair E, Slade GD, Dubner R, Fillingim RB, Greenspan JD, Ohrbach R, Knott C, Weir B, Maixner W, Diatchenko L.		Smith SB	J Pain	2013	PMC3855664	NIHMS527481	10.1016/j.jpain.2013.09.004
29062094	Genetic Variants Associated with Episodic Ataxia in Korea	Choi KD, Kim JS, Kim HJ, Jung I, Jeong SH, Lee SH, Kim DU, Kim SH, Choi SY, Shin JH, Kim DS, Park KP, Kim HS, Choi JH.		Choi KD	Sci Rep	2017	PMC5653837		10.1038/s41598-017-14254-7
28074849	Genetic Variants Identified from Epilepsy of Unknown Etiology in Chinese Children by Targeted Exome Sequencing	Wang Y, Du X, Bin R, Yu S, Xia Z, Zheng G, Zhong J, Zhang Y, Jiang YH, Wang Y.		Wang Y	Sci Rep	2017	PMC5225856		10.1038/srep40319
34226156	Genetics and clinical correlation of Dravet syndrome and its mimics - experience of a tertiary center in Taiwan	Liu YH, Cheng YT, Tsai MH, Chou IJ, Hung PC, Hsieh MY, Wang YS, Chen YJ, Kuo CY, Lin JJ, Wang HS, Lin KL.		Liu YH	Pediatr Neonatol	2021			10.1016/j.pedneo.2021.05.022
34053869	Genetics and gene therapy in Dravet syndrome	Higurashi N, Broccoli V, Hirose S.		Higurashi N	Epilepsy Behav	2021			10.1016/j.yebeh.2021.108043
19532038	Genetics of antiepileptic drug resistance	Sisodiya SM, Marini C.		Sisodiya SM	Curr Opin Neurol	2009			10.1097/WCO.0b013e32832923ec
29478594	Genetics of epilepsy	Nolan D, Fink J.		Nolan D	Handb Clin Neurol	2018			10.1016/B978-0-444-64076-5.00030-2
22618127	Genetics of epilepsy and relevance to current practice	Michelucci R, Pasini E, Riguzzi P, Volpi L, Dazzo E, Nobile C.		Michelucci R	Curr Neurol Neurosci Rep	2012			10.1007/s11910-012-0281-8
18765143	Genetics of headache in children: where are we headed?	Hershey AD.		Hershey AD	Curr Pain Headache Rep	2008			10.1007/s11916-008-0062-x
20816412	Genetics of headaches	Van Den Maagdenberg AM, Terwindt GM, Haan J, Frants RR, Ferrari MD.		Van Den Maagdenberg AM	Handb Clin Neurol	2010			10.1016/S0072-9752(10)97006-1
16302872	Genetics of idiopathic generalized epilepsies	Gardiner M.		Gardiner M	Epilepsia	2005			10.1111/j.1528-1167.2005.00310.x
18451712	Genetics of migraine: an update with special attention to genetic comorbidity	Stam AH, van den Maagdenberg AM, Haan J, Terwindt GM, Ferrari MD.		Stam AH	Curr Opin Neurol	2008			10.1097/WCO.0b013e3282fd171a
28271496	Genetics of Migraine: Insights into the Molecular Basis of Migraine Disorders	Sutherland HG, Griffiths LR.		Sutherland HG	Headache	2017			10.1111/head.13053
20331710	Genetics of the epilepsies: genetic twists in the channels and other tales	Scheffer IE, Zhang YH, Gecz J, Dibbens L.		Scheffer IE	Epilepsia	2010			10.1111/j.1528-1167.2009.02440.x
23429546	Genetics of the epilepsies: where are we and where are we going?	Helbig I, Lowenstein DH.		Helbig I	Curr Opin Neurol	2013	PMC3781236	NIHMS496088	10.1097/WCO.0b013e32835ee6ff
19270815	Gene-to-gene interaction between sodium channel-related genes in determining the risk of antiepileptic drug resistance	Jang SY, Kim MK, Lee KR, Park MS, Kim BC, Cho KH, Lee MC, Kim YS.		Jang SY	J Korean Med Sci	2009	PMC2650995		10.3346/jkms.2009.24.1.62
34145886	Genome sequencing of 320 Chinese children with epilepsy: a clinical and molecular study	Zou D, Wang L, Liao J, Xiao H, Duan J, Zhang T, Li J, Yin Z, Zhou J, Yan H, Huang Y, Zhan N, Yang Y, Ye J, Chen F, Zhu S, Wen F, Guo J.		Zou D	Brain	2021			10.1093/brain/awab233
22949513	Genome-wide association analysis of genetic generalized epilepsies implicates susceptibility loci at 1q43, 2p16.1, 2q22.3 and 17q21.32	EPICURE Consortium; EMINet Consortium, Steffens M, Leu C, Ruppert AK, Zara F, Striano P, Robbiano A, Capovilla G, Tinuper P, Gambardella A, Bianchi A, La Neve A, Crichiutti G, de Kovel CG, Kasteleijn-Nolst Trenit¨¦ D, de Haan GJ, Lindhout D, Gaus V, Schmitz B, Janz D, Weber YG, Becker F, Lerche H, Steinhoff BJ, Kleefu?-Lie AA, Kunz WS, Surges R, Elger CE, Muhle H, von Spiczak S, Ostertag P, Helbi…		EPICURE Consortium	Hum Mol Genet	2012			10.1093/hmg/dds373
34348663	Genome-wide CNV investigation suggests a role for cadherin, Wnt, and p53 pathways in primary open-angle glaucoma	Lo Faro V, Ten Brink JB, Snieder H, Jansonius NM, Bergen AA.		Lo Faro V	BMC Genomics	2021	PMC8336345		10.1186/s12864-021-07846-1
16273391	Genome-wide linkage of febrile seizures and epilepsy to the FEB4 locus at 5q14.3-q23.1 and no MASS1 mutation	Deprez L, Claes LR, Claeys KG, Audenaert D, Van Dyck T, Goossens D, Van Paesschen W, Del-Favero J, Van Broeckhoven C, De Jonghe P.		Deprez L	Hum Genet	2006			10.1007/s00439-005-0077-x
34569149	Genomic analysis of "microphenotypes" in epilepsy	Stanley K, Hostyk J, Tran L, Amengual-Gual M, Dugan P, Clark J, Choi H, Tchapyjnikov D, Perucca P, Fernandes C, Andrade D, Devinsky O; pSERG Consortium, the EPIGEN Consortium, Cavalleri GL, Depondt C, Sen A, O'Brien T, Heinzen E, Loddenkemper T, Goldstein DB, Mikati MA, Delanty N.		Stanley K	Am J Med Genet A	2021			10.1002/ajmg.a.62505
29142202	Genomic mosaicism in paternal sperm and multiple parental tissues in a Dravet syndrome cohort	Yang X, Liu A, Xu X, Yang X, Zeng Q, Ye AY, Yu Z, Wang S, Huang AY, Wu X, Wu Q, Wei L, Zhang Y.		Yang X	Sci Rep	2017	PMC5688122		10.1038/s41598-017-15814-7
30182498	Genotype and phenotype analysis using an epilepsy-associated gene panel in Chinese pediatric epilepsy patients	Miao P, Feng J, Guo Y, Wang J, Xu X, Wang Y, Li Y, Gao L, Zheng C, Cheng H.		Miao P	Clin Genet	2018			10.1111/cge.13441
25163687	Genotype phenotype associations across the voltage-gated sodium channel family	Brunklaus A, Ellis R, Reavey E, Semsarian C, Zuberi SM.		Brunklaus A	J Med Genet	2014			10.1136/jmedgenet-2014-102608
21248271	Genotype-phenotype associations in SCN1A-related epilepsies	Zuberi SM, Brunklaus A, Birch R, Reavey E, Duncan J, Forbes GH.		Zuberi SM	Neurology	2011			10.1212/WNL.0b013e31820c309b
32593896	Genotype-phenotype correlates of infantile-onset developmental & epileptic encephalopathy syndromes in South India: A single centre experience	Mitta N, Menon RN, McTague A, Radhakrishnan A, Sundaram S, Cherian A, Madhavilatha GK, Mannan AU, Nampoothiri S, Thomas SV.		Mitta N	Epilepsy Res	2020			10.1016/j.eplepsyres.2020.106398
31791873	Genotype-phenotype correlation on 45 individuals with West syndrome	Krey I, Krois-Neudenberger J, Hentschel J, Syrbe S, Polster T, Hanker B, Fiedler B, Kurlemann G, Lemke JR.		Krey I	Eur J Paediatr Neurol	2020			10.1016/j.ejpn.2019.11.010
20729507	Genotype-phenotype correlations in a group of 15 SCN1A-mutated Italian patients with GEFS+ spectrum (seizures plus, classical and borderline severe myoclonic epilepsy of infancy)	Nicita F, Spalice A, Papetti L, Ursitti F, Parisi P, Gennaro E, Zara F, Iannetti P.		Nicita F	J Child Neurol	2010			10.1177/0883073810365737
33058759	Germline and Mosaic Variants in PRKACA and PRKACB Cause a Multiple Congenital Malformation Syndrome	Palencia-Campos A, Aoto PC, Machal EMF, Rivera-Barahona A, Soto-Bielicka P, Bertinetti D, Baker B, Vu L, Piceci-Sparascio F, Torrente I, Boudin E, Peeters S, Van Hul W, Huber C, Bonneau D, Hildebrand MS, Coleman M, Bahlo M, Bennett MF, Schneider AL, Scheffer IE, Kib?k M, Kristiansen BS, Issa MY, Mehrez MI, Ismail S, Tenorio J, Li G, Sk?lhegg BS, Otaify GA, Temtamy S, Aglan M, J?nch AE, De Luca A,…		Palencia-Campos A	Am J Hum Genet	2020	PMC7675002		10.1016/j.ajhg.2020.09.005
31940483	GluN2A NMDA Receptor Enhancement Improves Brain Oscillations, Synchrony, and Cognitive Functions in Dravet Syndrome and Alzheimer's Disease Models	Hanson JE, Ma K, Elstrott J, Weber M, Saillet S, Khan AS, Simms J, Liu B, Kim TA, Yu GQ, Chen Y, Wang TM, Jiang Z, Liederer BM, Deshmukh G, Solanoy H, Chan C, Sellers BD, Volgraf M, Schwarz JB, Hackos DH, Weimer RM, Sheng M, Gill TM, Scearce-Levie K, Palop JJ.		Hanson JE	Cell Rep	2020	PMC7017907	NIHMS1550149	10.1016/j.celrep.2019.12.030
29031192	Growth and endocrine function in children with Dravet syndrome	Eschbach K, Scarbro S, Juarez-Colunga E, Allen V, Hsu S, Knupp K.		Eschbach K	Seizure	2017			10.1016/j.seizure.2017.09.021
33882967	Guidelines on the diagnosis, clinical assessments, treatment and management for CLN2 disease patients	Mole SE, Schulz A, Badoe E, Berkovic SF, de Los Reyes EC, Dulz S, Gissen P, Guelbert N, Lourenco CM, Mason HL, Mink JW, Murphy N, Nickel M, Olaya JE, Scarpa M, Scheffer IE, Simonati A, Specchio N, Von L?bbecke I, Wang RY, Williams RE.		Mole SE	Orphanet J Rare Dis	2021	PMC8059011		10.1186/s13023-021-01813-5
21768184	Head tremor related to CACNA1A mutations	Geerlings RP, Koehler PJ, Haane DY, Stam AH, de Vries B, Boon EM, Haan J.		Geerlings RP	Cephalalgia	2011			10.1177/0333102411414442
23801004	Headache and epilepsy	Bauer PR, Carpay JA, Terwindt GM, Sander JW, Thijs RJ, Haan J, Visser GH.		Bauer PR	Curr Pain Headache Rep	2013			10.1007/s11916-013-0351-x
29873813	Heart rate variability in epilepsy: A potential biomarker of sudden unexpected death in epilepsy risk	Myers KA, Bello-Espinosa LE, Symonds JD, Zuberi SM, Clegg R, Sadleir LG, Buchhalter J, Scheffer IE.		Myers KA	Epilepsia	2018			10.1111/epi.14438
28505490	Heat induced temperature dysregulation and seizures in Dravet Syndrome/GEFS+ Gabrg2(+/Q390X) mice	Warner TA, Liu Z, Macdonald RL, Kang JQ.		Warner TA	Epilepsy Res	2017	PMC5512282	NIHMS876902	10.1016/j.eplepsyres.2017.04.020
19563349	Hemiconvulsion-hemiplegia syndrome in a patient with severe myoclonic epilepsy in infancy	Sakakibara T, Nakagawa E, Saito Y, Sakuma H, Komaki H, Sugai K, Sasaki M, Kurahashi H, Hirose S.		Sakakibara T	Epilepsia	2009			10.1111/j.1528-1167.2009.02175.x
30020674	Hemiplegic Migraine	Kumar A, Samanta D, Emmady PD, Arora R.		Kumar ASamanta DEmmady PDArora R	StatPearls	2021
34649875	Hemiplegic Migraine Associated With PRRT2 Mutations: A Clinical and Genetic Study	Riant F, Roos C, Roubertie A, Barbance C, Hadjadj J, Auvin S, Baille G, Beltramone M, Boulanger C, Cahn A, Cata F, Cheuret E, Cuvellier JC, Defo A, Demarquay G, Donnet A, Gaillard N, Massardier E, Guy N, Lamoureux S, Le Moigno L, Lucas C, Ratiu D, Redon S, Rey C, Thauvin C, Viallet F, Tournier-Lasserve E, Ducros A.		Riant F	Neurology	2021			10.1212/WNL.0000000000012947
20392657	Hepatic coma culminating in severe brain damage in a child with a SCN1A mutation	Nishri D, Blumkin L, Lev D, Leshinsky-Silver E, Abu-Rashid M, Birch R, Zuberi SM, Lerman-Sagie T.		Nishri D	Eur J Paediatr Neurol	2010			10.1016/j.ejpn.2010.03.002
30071822	Heterozygous deletion of SCN2A and SCN3A in a patient with autism spectrum disorder and Tourette syndrome: a case report	Nickel K, Tebartz van Elst L, Domschke K, Gl?ser B, Stock F, Endres D, Maier S, Riedel A.		Nickel K	BMC Psychiatry	2018	PMC6090917		10.1186/s12888-018-1822-8
34379890	High FGF-21 level in a cohort of 22 patients with Dravet Syndrome-Possible relationship with the disease outcomes	Kwong AK, Wong VC, Wong SS, Chu VL, Koene S, Smeitink J, Fung CW.		Kwong AK	Epilepsia Open	2021			10.1002/epi4.12534
28837158	High frequency of mosaic pathogenic variants in genes causing epilepsy-related neurodevelopmental disorders	Stosser MB, Lindy AS, Butler E, Retterer K, Piccirillo-Stosser CM, Richard G, McKnight DA.		Stosser MB	Genet Med	2018	PMC5895461		10.1038/gim.2017.114
33278787	High genetic burden in 163 Chinese children with status epilepticus	Wang T, Wang J, Ma Y, Zhou H, Ding D, Li C, Du X, Jiang YH, Wang Y, Long S, Li S, Lu G, Chen W, Zhou Y, Zhou S, Wang Y.		Wang T	Seizure	2021			10.1016/j.seizure.2020.10.032
21959335	High incidence of pediatric idiopathic epilepsy is associated with familial and autosomal dominant disease in Eastern Newfoundland	Mahoney K, Buckley D, Alam M, Penney S, Young TL, Parfrey P, Moore SJ.		Mahoney K	Epilepsy Res	2012			10.1016/j.eplepsyres.2011.09.003
26482601	High prevalence of genetic alterations in early-onset epileptic encephalopathies associated with infantile movement disorders	Kobayashi Y, Tohyama J, Kato M, Akasaka N, Magara S, Kawashima H, Ohashi T, Shiraishi H, Nakashima M, Saitsu H, Matsumoto N.		Kobayashi Y	Brain Dev	2016			10.1016/j.braindev.2015.09.011
20041941	High-density SNP screen of sodium channel genes by haplotype tagging and DNA pooling for association with idiopathic generalized epilepsy	Makoff A, Lai T, Barratt C, Valentin A, Moran N, Asherson P, Nashef L.		Makoff A	Epilepsia	2010			10.1111/j.1528-1167.2009.02473.x
31980564	Higher burden of rare frameshift indels in genes related to synaptic transmission separate familial hemiplegic migraine from common types of migraine	Rasmussen AH, Olofsson I, Chalmer MA, Olesen J, Hansen TF.		Rasmussen AH	J Med Genet	2020	PMC7476275		10.1136/jmedgenet-2019-106640
22920678	High-frequency EEG oscillations in hyperthermia-induced seizures of Scn1a mutant rats	Kobayashi K, Ohmori I, Hayashi K, Kitagawa Y, Ouchida M, Inoue T, Ohtsuka Y.		Kobayashi K	Epilepsy Res	2013			10.1016/j.eplepsyres.2012.07.020
24372310	High-resolution molecular genomic autopsy reveals complex sudden unexpected death in epilepsy risk profile	Klassen TL, Bomben VC, Patel A, Drabek J, Chen TT, Gu W, Zhang F, Chapman K, Lupski JR, Noebels JL, Goldman AM.		Klassen TL	Epilepsia	2014	PMC4195652	NIHMS539015	10.1111/epi.12489
28683073	High-throughput electrophysiological assays for voltage gated ion channels using SyncroPatch 768PE	Li T, Lu G, Chiang EY, Chernov-Rogan T, Grogan JL, Chen J.		Li T	PLoS One	2017	PMC5500279		10.1371/journal.pone.0180154
31346088	Hippocampal deletion of Na(V)1.1 channels in mice causes thermal seizures and cognitive deficit characteristic of Dravet Syndrome	Stein RE, Kaplan JS, Li J, Catterall WA.		Stein RE	Proc Natl Acad Sci U S A	2019	PMC6697805		10.1073/pnas.1906833116
23663038	Hippocampal hyperexcitability and specific epileptiform activity in a mouse model of Dravet syndrome	Liautard C, Scalmani P, Carriero G, de Curtis M, Franceschetti S, Mantegazza M.		Liautard C	Epilepsia	2013			10.1111/epi.12213
26656780	Hlf is a genetic modifier of epilepsy caused by voltage-gated sodium channel mutations	Hawkins NA, Kearney JA.		Hawkins NA	Epilepsy Res	2016	PMC4698075	NIHMS742568	10.1016/j.eplepsyres.2015.11.016
31697745	Home-cage monitoring ascertains signatures of ictal and interictal behavior in mouse models of generalized seizures	Jankovic MJ, Kapadia PP, Krishnan V.		Jankovic MJ	PLoS One	2019	PMC6837443		10.1371/journal.pone.0224856
25795284	Homozygous mutations in the SCN1A gene associated with genetic epilepsy with febrile seizures plus and Dravet syndrome in 2 families	Brunklaus A, Ellis R, Stewart H, Aylett S, Reavey E, Jefferson R, Jain R, Chakraborty S, Jayawant S, Zuberi SM.		Brunklaus A	Eur J Paediatr Neurol	2015			10.1016/j.ejpn.2015.02.001
33901312	Homozygous SCN1B variants causing early infantile epileptic encephalopathy 52 affect voltage-gated sodium channel function	Scala M, Efthymiou S, Sultan T, De Waele J, Panciroli M, Salpietro V, Maroofian R, Striano P, Van Petegem F, Houlden H, Bosmans F.		Scala M	Epilepsia	2021			10.1111/epi.16913
18342948	How do mutant Nav1.1 sodium channels cause epilepsy?	Ragsdale DS.		Ragsdale DS	Brain Res Rev	2008			10.1016/j.brainresrev.2008.01.003
22843408	How Dravet syndrome became a model for studying childhood genetic epilepsies	Dravet C.		Dravet C	Brain	2012			10.1093/brain/aws198
23034800	Human herpesvirus 6-associated encephalopathy in a child with Dravet syndrome	Hiraiwa-Sofue A, Ito Y, Ohta R, Kimura H, Okumura A.		Hiraiwa-Sofue A	Neuropediatrics	2013			10.1055/s-0032-1327772
26182346	Human Nav1.6 Channels Generate Larger Resurgent Currents than Human Nav1.1 Channels, but the Nav¦Â4 Peptide Does Not Protect Either Isoform from Use-Dependent Reduction	Patel RR, Barbosa C, Xiao Y, Cummins TR.		Patel RR	PLoS One	2015	PMC4504674		10.1371/journal.pone.0133485
27799911	Huperzine A Provides Robust and Sustained Protection against Induced Seizures in Scn1a Mutant Mice	Wong JC, Dutton SB, Collins SD, Schachter S, Escayg A.		Wong JC	Front Pharmacol	2016	PMC5065986		10.3389/fphar.2016.00357
34546973	Hyperexcitable interneurons trigger cortical spreading depression in an Scn1a migraine model	Auffenberg E, Hedrich UB, Barbieri R, Miely D, Groschup B, Wuttke TV, Vogel N, L¨¹hrs P, Zanardi I, Bertelli S, Spielmann N, Gailus-Durner V, Fuchs H, Hrab¨§ de Angelis M, Pusch M, Dichgans M, Lerche H, Gavazzo P, Plesnila N, Freilinger T.		Auffenberg E	J Clin Invest	2021	PMC8553559		10.1172/JCI142202
25046982	Ictal ontogeny in Dravet syndrome	Kim SH, Nordli DR Jr, Berg AT, Koh S, Laux L.		Kim SH	Clin Neurophysiol	2015			10.1016/j.clinph.2014.06.024
34161902	Identification and successful management of near-lethal ventricular tachycardia in 2q24 deletion-associated developmental and epileptic encephalopathy	Toth J, Waickman A, Jost J, Seltzer L, Vinocur JM, Auerbach DS.		Toth J	Seizure	2021			10.1016/j.seizure.2021.06.003
21634377	Identification of a potent, state-dependent inhibitor of Nav1.7 with oral efficacy in the formalin model of persistent pain	Bregman H, Berry L, Buchanan JL, Chen A, Du B, Feric E, Hierl M, Huang L, Immke D, Janosky B, Johnson D, Li X, Ligutti J, Liu D, Malmberg A, Matson D, McDermott J, Miu P, Nguyen HN, Patel VF, Waldon D, Wilenkin B, Zheng XM, Zou A, McDonough SI, DiMauro EF.		Bregman H	J Med Chem	2011			10.1021/jm200018k
16326807	Identification of an Nav1.1 sodium channel (SCN1A) loss-of-function mutation associated with familial simple febrile seizures	Mantegazza M, Gambardella A, Rusconi R, Schiavon E, Annesi F, Cassulini RR, Labate A, Carrideo S, Chifari R, Canevini MP, Canger R, Franceschetti S, Annesi G, Wanke E, Quattrone A.		Mantegazza M	Proc Natl Acad Sci U S A	2005	PMC1312393		10.1073/pnas.0506818102
11700294	Identification of epilepsy genes in human and mouse	Meisler MH, Kearney J, Ottman R, Escayg A.		Meisler MH	Annu Rev Genet	2001	PMC2765248	NIHMS141242	10.1146/annurev.genet.35.102401.091142
23030542	Identification of novel genes involved in migraine	Lafreni¨¨re RG, Rouleau GA.		Lafreni¨¨re RG	Headache	2012			10.1111/j.1526-4610.2012.02237.x
21566136	Identification of novel interaction sites that determine specificity between fibroblast growth factor homologous factors and voltage-gated sodium channels	Wang C, Wang C, Hoch EG, Pitt GS.		Wang C	J Biol Chem	2011	PMC3129206		10.1074/jbc.M111.245803
32508047	Identification of potential candidate genes and pathways in atrioventricular nodal reentry tachycardia by whole-exome sequencing	Luo R, Zheng C, Yang H, Chen X, Jiang P, Wu X, Yang Z, Shen X, Li X.		Luo R	Clin Transl Med	2020	PMC7240861		10.1002/ctm2.25
22848613	Identification of SCN1A and PCDH19 mutations in Chinese children with Dravet syndrome	Kwong AK, Fung CW, Chan SY, Wong VC.		Kwong AK	PLoS One	2012	PMC3405017		10.1371/journal.pone.0041802
18655196	Identification of the promoter region and the 5'-untranslated exons of the human voltage-gated sodium channel Nav1.1 gene (SCN1A) and enhancement of gene expression by the 5'-untranslated exons	Long YS, Zhao QH, Su T, Cai YL, Zeng Y, Shi YW, Yi YH, Chang HH, Liao WP.		Long YS	J Neurosci Res	2008			10.1002/jnr.21790
28951233	Identification of two mutations in cis in the SCN1A gene in a family showing genetic epilepsy with febrile seizures plus (GEFS+) and idiopathic generalized epilepsy (IGE)	Binini N, Sancini G, Villa C, Dal Magro R, Sansoni V, Rusconi R, Mantegazza M, Grioni D, Talpo F, Toselli M, Combi R.		Binini N	Brain Res	2017			10.1016/j.brainres.2017.09.023
30870728	Identifying mutations in epilepsy genes: Impact on treatment selection	Perucca P, Perucca E.		Perucca P	Epilepsy Res	2019			10.1016/j.eplepsyres.2019.03.001
17561957	Idiopathic epilepsies with seizures precipitated by fever and SCN1A abnormalities	Marini C, Mei D, Temudo T, Ferrari AR, Buti D, Dravet C, Dias AI, Moreira A, Calado E, Seri S, Neville B, Narbona J, Reid E, Michelucci R, Sicca F, Cross HJ, Guerrini R.		Marini C	Epilepsia	2007			10.1111/j.1528-1167.2007.01122.x
16815341	Immunolocalization of NaV1.2 channel subtypes in rat and cat brain and spinal cord with high affinity antibodies	Jarnot M, Corbett AM.		Jarnot M	Brain Res	2006			10.1016/j.brainres.2006.05.090
32375095	Impact of childhood Dravet syndrome on care givers of patients with DS, a major impact on mothers	Nabbout R, Dirani M, Teng T, Bianic F, Martin M, Holland R, Chemaly N, Coque N.		Nabbout R	Epilepsy Behav	2020			10.1016/j.yebeh.2020.107094
25378155	Impaired action potential initiation in GABAergic interneurons causes hyperexcitable networks in an epileptic mouse model carrying a human Na(V)1.1 mutation	Hedrich UB, Liautard C, Kirschenbaum D, Pofahl M, Lavigne J, Liu Y, Theiss S, Slotta J, Escayg A, Dihn¨¦ M, Beck H, Mantegazza M, Lerche H.		Hedrich UB	J Neurosci	2014	PMC4220023		10.1523/JNEUROSCI.0721-14.2014
25024183	Impaired excitability of somatostatin- and parvalbumin-expressing cortical interneurons in a mouse model of Dravet syndrome	Tai C, Abe Y, Westenbroek RE, Scheuer T, Catterall WA.		Tai C	Proc Natl Acad Sci U S A	2014	PMC4121787		10.1073/pnas.1411131111
16822974	Impaired firing and cell-specific compensation in neurons lacking nav1.6 sodium channels	Van Wart A, Matthews G.		Van Wart A	J Neurosci	2006	PMC6673932		10.1523/JNEUROSCI.1101-06.2006
17228331	Impaired firing and sodium channel function in CA1 hippocampal interneurons after transient cerebral ischemia	Zhan RZ, Nadler JV, Schwartz-Bloom RD.		Zhan RZ	J Cereb Blood Flow Metab	2007			10.1038/sj.jcbfm.9600448
17065438	Impaired inactivation gate stabilization predicts increased persistent current for an epilepsy-associated SCN1A mutation	Kahlig KM, Misra SN, George AL Jr.		Kahlig KM	J Neurosci	2006	PMC6674674		10.1523/JNEUROSCI.3378-06.2006
28356460	Impaired intracortical inhibition demonstrated in vivo in people with Dravet syndrome	Stern WM, Sander JW, Rothwell JC, Sisodiya SM.		Stern WM	Neurology	2017	PMC5405762		10.1212/WNL.0000000000003868
19372756	Impaired plasma membrane targeting or protein stability by certain ATP1A2 mutations identified in sporadic or familial hemiplegic migraine	Tavraz NN, D¨¹rr KL, Koenderink JB, Freilinger T, Bamberg E, Dichgans M, Friedrich T.		Tavraz NN	Channels (Austin)	2009			10.4161/chan.3.2.8085
33234612	Impaired ¦È-¦Ã Coupling Indicates Inhibitory Dysfunction and Seizure Risk in a Dravet Syndrome Mouse Model	Jansen NA, Perez C, Schenke M, van Beurden AW, Dehghani A, Voskuyl RA, Thijs RD, Ullah G, van den Maagdenberg AMJM, Tolner EA.		Jansen NA	J Neurosci	2021	PMC7821857		10.1523/JNEUROSCI.2132-20.2020
31537705	Impairment of Sharp-Wave Ripples in a Murine Model of Dravet Syndrome	Cheah CS, Lundstrom BN, Catterall WA, Oakley JC.		Cheah CS	J Neurosci	2019	PMC6855681		10.1523/JNEUROSCI.0890-19.2019
29337050	Impairments in social novelty recognition and spatial memory in mice with conditional deletion of Scn1a in parvalbumin-expressing cells	Tatsukawa T, Ogiwara I, Mazaki E, Shimohata A, Yamakawa K.		Tatsukawa T	Neurobiol Dis	2018			10.1016/j.nbd.2018.01.009
26993267	Improving diagnosis and broadening the phenotypes in early-onset seizure and severe developmental delay disorders through gene panel analysis	Trump N, McTague A, Brittain H, Papandreou A, Meyer E, Ngoh A, Palmer R, Morrogh D, Boustred C, Hurst JA, Jenkins L, Kurian MA, Scott RH.		Trump N	J Med Genet	2016	PMC4862068		10.1136/jmedgenet-2015-103263
30735520	In vivo, in vitro and in silico correlations of four de novo SCN1A missense mutations	Nissenkorn A, Almog Y, Adler I, Safrin M, Brusel M, Marom M, Bercovich S, Yakubovich D, Tzadok M, Ben-Zeev B, Rubinstein M.		Nissenkorn A	PLoS One	2019	PMC6368302		10.1371/journal.pone.0211901
31302675	Incidence and phenotypes of childhood-onset genetic epilepsies: a prospective population-based national cohort	Symonds JD, Zuberi SM, Stewart K, McLellan A, O'Regan M, MacLeod S, Jollands A, Joss S, Kirkpatrick M, Brunklaus A, Pilz DT, Shetty J, Dorris L, Abu-Arafeh I, Andrew J, Brink P, Callaghan M, Cruden J, Diver LA, Findlay C, Gardiner S, Grattan R, Lang B, MacDonnell J, McKnight J, Morrison CA, Nairn L, Slean MM, Stephen E, Webb A, Vincent A, Wilson M.		Symonds JD	Brain	2019	PMC6658850		10.1093/brain/awz195
26438699	Incidence of Dravet Syndrome in a US Population	Wu YW, Sullivan J, McDaniel SS, Meisler MH, Walsh EM, Li SX, Kuzniewicz MW.		Wu YW	Pediatrics	2015	PMC4621800		10.1542/peds.2015-1807
29760947	Incorporating epilepsy genetics into clinical practice: a 360¡ãevaluation	Oates S, Tang S, Rosch R, Lear R, Hughes EF, Williams RE, Larsen LHG, Hao Q, Dahl HA, M?ller RS, Pal DK.		Oates S	NPJ Genom Med	2018	PMC5945675		10.1038/s41525-018-0052-9
21714116	Increased expression of sodium channel subunit Nav1.1 in the injured dorsal root ganglion after peripheral nerve injury	Wang W, Atianjoh F, Gauda EB, Yaster M, Li Y, Tao YX.		Wang W	Anat Rec (Hoboken)	2011	PMC3140573	NIHMS295085	10.1002/ar.21437
19584134	Increased late sodium currents are related to transcription of neuronal isoforms in a pressure-overload model	Xi Y, Wu G, Yang L, Han K, Du Y, Wang T, Lei X, Bai X, Ma A.		Xi Y	Eur J Heart Fail	2009			10.1093/eurjhf/hfp092
14702334	Increased neuronal firing in computer simulations of sodium channel mutations that cause generalized epilepsy with febrile seizures plus	Spampanato J, Aradi I, Soltesz I, Goldin AL.		Spampanato J	J Neurophysiol	2004			10.1152/jn.00982.2003
23118319	Index of suspicion	Tintle SJ, Antaya RJ, Halasz CL, Tuli S, Khuddus N, Tuli S, Yester M, Kidder M.		Tintle SJ	Pediatr Rev	2012			10.1542/pir.33-11-525
24838856	Induced pluripotent stem cells for modeling of pediatric neurological disorders	Jang J, Quan Z, Yum YJ, Song HS, Paek S, Kang HC.		Jang J	Biotechnol J	2014			10.1002/biot.201400010
21893419	Infantile epilepsy associated with mosaic 2q24 duplication including SCN2A and SCN3A	Vecchi M, Cassina M, Casarin A, Rigon C, Drigo P, De Palma L, Clementi M.		Vecchi M	Seizure	2011			10.1016/j.seizure.2011.07.008
24776920	Infantile epileptic encephalopathy with a hyperkinetic movement disorder and hand stereotypies associated with a novel SCN1A mutation	Ohashi T, Akasaka N, Kobayashi Y, Magara S, Kawashima H, Matsumoto N, Saitsu H, Tohyama J.		Ohashi T	Epileptic Disord	2014			10.1684/epd.2014.0649
31144463	Influence of common SCN1A promoter variants on the severity of SCN1A-related phenotypes	de Lange IM, Weuring W, van 't Slot R, Gunning B, Sonsma ACM, McCormack M, de Kovel C, van Gemert LJJM, Mulder F, van Kempen MJA, Knoers NVAM, Brilstra EH, Koeleman BPC.		de Lange IM	Mol Genet Genomic Med	2019	PMC6625088		10.1002/mgg3.727
29750338	Influence of contraindicated medication use on cognitive outcome in Dravet syndrome and age at first afebrile seizure as a clinical predictor in SCN1A-related seizure phenotypes	de Lange IM, Gunning B, Sonsma ACM, van Gemert L, van Kempen M, Verbeek NE, Nicolai J, Knoers NVAM, Koeleman BPC, Brilstra EH.		de Lange IM	Epilepsia	2018			10.1111/epi.14191
24052718	Influence of the SCN1A IVS5N + 5 G>A Polymorphism on Therapy with Carbamazepine for Epilepsy	Sterjev Z, Kiteva G, Cvetkovska E, Petrov I, Kuzmanovski I, Ribarska T, Nestorovska K, Matevska N, Trajkovik-Jolevska S, Dimovski A, Suturkova Lj.		Sterjev Z	Balkan J Med Genet	2012	PMC3776651		10.2478/v10034-012-0003-1
23375560	Inhalation of 10% carbon dioxide rapidly terminates Scn1a mutation-related hyperthermia-induced seizures	Ohmori I, Hayashi K, Wang H, Ouchida M, Fujita N, Inoue T, Michiue H, Nishiki T, Matsui H.		Ohmori I	Epilepsy Res	2013			10.1016/j.eplepsyres.2013.01.003
30219789	Inhibitory effects of cannabidiol on voltage-dependent sodium currents	Ghovanloo MR, Shuart NG, Mezeyova J, Dean RA, Ruben PC, Goodchild SJ.		Ghovanloo MR	J Biol Chem	2018	PMC6204917		10.1074/jbc.RA118.004929
22541439	Inhibitory interneuron deficit links altered network activity and cognitive dysfunction in Alzheimer model	Verret L, Mann EO, Hang GB, Barth AM, Cobos I, Ho K, Devidze N, Masliah E, Kreitzer AC, Mody I, Mucke L, Palop JJ.		Verret L	Cell	2012	PMC3375906	NIHMS362541	10.1016/j.cell.2012.02.046
34017040	Inhibitory synaptic transmission is impaired at higher extracellular Ca(2+) concentrations in Scn1a(+/-) mouse model of Dravet syndrome	Uchino K, Kawano H, Tanaka Y, Adaniya Y, Asahara A, Deshimaru M, Kubota K, Watanabe T, Katsurabayashi S, Iwasaki K, Hirose S.		Uchino K	Sci Rep	2021	PMC8137694		10.1038/s41598-021-90224-4
34491914	Initiation of migraine-related cortical spreading depolarization by hyperactivity of GABAergic neurons and NaV1.1 channels	Chever O, Zerimech S, Scalmani P, Lemaire L, Pizzamiglio L, Loucif A, Ayrault M, Krupa M, Desroches M, Duprat F, L¨¦na I, Cest¨¨le S, Mantegazza M.		Chever O	J Clin Invest	2021	PMC8553565		10.1172/JCI142203
21463282	Insights into pathophysiology and therapy from a mouse model of Dravet syndrome	Oakley JC, Kalume F, Catterall WA.		Oakley JC	Epilepsia	2011	PMC3547637	NIHMS430772	10.1111/j.1528-1167.2011.03004.x
33726816	Integration of whole genome sequencing into a healthcare setting: high diagnostic rates across multiple clinical entities in 3219 rare disease patients	Stranneheim H, Lagerstedt-Robinson K, Magnusson M, Kvarnung M, Nilsson D, Lesko N, Engvall M, Anderlid BM, Arnell H, Johansson CB, Barbaro M, Bj?rck E, Bruhn H, Eisfeldt J, Freyer C, Grigelioniene G, Gustavsson P, Hammarsj? A, Hellstr?m-Pigg M, Iwarsson E, Jemt A, Laaksonen M, Enoksson SL, Malmgren H, Naess K, Nordenskj?ld M, Oscarson M, Pettersson M, Rasi C, Rosenbaum A, Sahlin E, Sardh E, St?db…		Stranneheim H	Genome Med	2021	PMC7968334		10.1186/s13073-021-00855-5
32608111	Interactions between cannabidiol and ¦¤(9) -tetrahydrocannabinol in modulating seizure susceptibility and survival in a mouse model of Dravet syndrome	Anderson LL, Low IK, McGregor IS, Arnold JC.		Anderson LL	Br J Pharmacol	2020	PMC7443476		10.1111/bph.15181
25142193	Interleukin-6 inhibits voltage-gated sodium channel activity of cultured rat spinal cord neurons	Li X, Chen W, Sheng J, Cao D, Wang W.		Li X	Acta Neuropsychiatr	2014			10.1017/neu.2013.49
32102923	Interneuron Desynchronization Precedes Seizures in a Mouse Model of Dravet Syndrome	Tran CH, Vaiana M, Nakuci J, Somarowthu A, Goff KM, Goldstein N, Murthy P, Muldoon SF, Goldberg EM.		Tran CH	J Neurosci	2020	PMC7096149		10.1523/JNEUROSCI.2370-19.2020
33658306	Interneuron Dysfunction in a New Mouse Model of SCN1A GEFS	Das A, Zhu B, Xie Y, Zeng L, Pham AT, Neumann JC, Safrina O, Benavides DR, MacGregor GR, Schutte SS, Hunt RF, O'Dowd DK.		Das A	eNeuro	2021	PMC8174035		10.1523/ENEURO.0394-20.2021
32709127	Inter-Regulation of K(v)4.3 and Voltage-Gated Sodium Channels Underlies Predisposition to Cardiac and Neuronal Channelopathies	Clatot J, Neyroud N, Cox R, Souil C, Huang J, Guicheney P, Antzelevitch C.		Clatot J	Int J Mol Sci	2020	PMC7404392		10.3390/ijms21145057
24080482	Interstitial 2q24.3 deletion including SCN2A and SCN3A genes in a patient with autistic features, psychomotor delay, microcephaly and no history of seizures	Celle ME, Cuoco C, Porta S, Gimelli G, Tassano E.		Celle ME	Gene	2013			10.1016/j.gene.2013.09.073
25926453	Intracellular FGF14 (iFGF14) Is Required for Spontaneous and Evoked Firing in Cerebellar Purkinje Neurons and for Motor Coordination and Balance	Bosch MK, Carrasquillo Y, Ransdell JL, Kanakamedala A, Ornitz DM, Nerbonne JM.		Bosch MK	J Neurosci	2015	PMC4412895		10.1523/JNEUROSCI.2663-14.2015
20042730	Intrinsic membrane properties of locus coeruleus neurons in Mecp2-null mice	Zhang X, Cui N, Wu Z, Su J, Tadepalli JS, Sekizar S, Jiang C.		Zhang X	Am J Physiol Cell Physiol	2010	PMC2838567		10.1152/ajpcell.00442.2009
25690317	Investigating the genetic basis of fever-associated syndromic epilepsies using copy number variation analysis	Hartmann C, von Spiczak S, Suls A, Weckhuysen S, Buyse G, Vilain C, Van Bogaert P, De Jonghe P, Cook J, Muhle H, Stephani U, Helbig I, Mefford HC.		Hartmann C	Epilepsia	2015	PMC4363163	NIHMS650313	10.1111/epi.12920
31186344	Investigating the Therapeutic Mechanism of Cannabidiol in a Human Induced Pluripotent Stem Cell (iPSC)-Based Model of Dravet Syndrome	Sun Y, Dolmetsch RE.		Sun Y	Cold Spring Harb Symp Quant Biol	2018			10.1101/sqb.2018.83.038174
28488083	Ion Channel Genes and Epilepsy: Functional Alteration, Pathogenic Potential, and Mechanism of Epilepsy	Wei F, Yan LM, Su T, He N, Lin ZJ, Wang J, Shi YW, Yi YH, Liao WP.		Wei F	Neurosci Bull	2017	PMC5567559		10.1007/s12264-017-0134-1
11690625	Ion channel variation causes epilepsies	Moulard B, Picard F, le Hellard S, Agulhon C, Weiland S, Favre I, Bertrand S, Malafosse A, Bertrand D.		Moulard B	Brain Res Brain Res Rev	2001			10.1016/s0165-0173(01)00104-7
11579435	Ion channels and epilepsy	Lerche H, Jurkat-Rott K, Lehmann-Horn F.		Lerche H	Am J Med Genet	2001			10.1002/ajmg.1582
13129592	Is phenotype difference in severe myoclonic epilepsy in infancy related to SCN1A mutations?	Ohmori I, Ohtsuka Y, Ouchida M, Ogino T, Maniwa S, Shimizu K, Oka E.		Ohmori I	Brain Dev	2003			10.1016/s0387-7604(03)00038-x
31035820	Is Targeting of Compensatory Ion Channel Gene Expression a Viable Therapeutic Strategy for Dravet Syndrome?	Isom LL.		Isom LL	Epilepsy Curr	2019	PMC6610383		10.1177/1535759719844780
20484680	Key epilepsy gene gets further phenotypic delineation	Sheth RD, Berkovic SF.		Sheth RD	Neurology	2010			10.1212/WNL.0b013e3181e621b8
24805083	Knock-in model of Dravet syndrome reveals a constitutive and conditional reduction in sodium current	Schutte RJ, Schutte SS, Algara J, Barragan EV, Gilligan J, Staber C, Savva YA, Smith MA, Reenan R, O'Dowd DK.		Schutte RJ	J Neurophysiol	2014	PMC4122742		10.1152/jn.00135.2014
24315024	Lack of pathogenic mutations in six patients with MMPSI	De Filippo MR, Rizzo F, Marchese G, Giurato G, Nassa G, Ravo M, Tarallo R, Pironti E, Vecchi M, Crichiutti G, Capizzi G, Verrotti A, Weisz A, Coppola G.		De Filippo MR	Epilepsy Res	2014			10.1016/j.eplepsyres.2013.11.007
19949041	Lack of replication of association between scn1a SNP and febrile seizures	Petrovski S, Scheffer IE, Sisodiya SM, O'Brien TJ, Berkovic SF; EPIGEN Consortium.		Petrovski S	Neurology	2009	PMC2881860		10.1212/WNL.0b013e3181c3fd6f
12027919	Lack of SCN1A mutations in familial febrile seizures	Malacarne M, Madia F, Gennaro E, Vacca D, G¨¹ney AI, Buono S, Bernardina BD, Gaggero R, Gobbi G, Lispi ML, Malamaci D, Melideo G, Roccella M, Sferro C, Tiberti A, Vanadia F, Vigevano F, Viri F, Vitali MR, Bricarelli FD, Bianchi A, Zara F.		Malacarne M	Epilepsia	2002			10.1046/j.1528-1157.2002.29301.x
25510870	Lactational exposure to low levels of the six indicator non-dioxin-like polychlorinated biphenyls induces DNA damage and repression of neuronal activity, in juvenile male mice	Elnar AA, Desor F, Marin F, Soulimani R, Nemos C.		Elnar AA	Toxicology	2015			10.1016/j.tox.2014.12.011
26465006	Large-Scale Phenotype-Based Antiepileptic Drug Screening in a Zebrafish Model of Dravet Syndrome	Dinday MT, Baraban SC.		Dinday MT	eNeuro	2015	PMC4596025		10.1523/ENEURO.0068-15.2015
28664031	Large-scale structural alteration of brain in epileptic children with SCN1A mutation	Lee YJ, Yum MS, Kim MJ, Shim WH, Yoon HM, Yoo IH, Lee J, Lim BC, Kim KJ, Ko TS.		Lee YJ	Neuroimage Clin	2017	PMC5479971		10.1016/j.nicl.2017.06.002
33864849	Lasting effects of mild embryonic ethanol exposure on voltage-gated ion channels in adult zebrafish brain	Chatterjee D, Mahabir S, Chatterjee D, Gerlai R.		Chatterjee D	Prog Neuropsychopharmacol Biol Psychiatry	2021			10.1016/j.pnpbp.2021.110327
34268891	Late diagnoses of Dravet syndrome: How many individuals are we missing?	Silvennoinen K, Puvirajasinghe C, Hudgell K, Sidhu MK, Martins Custodio H; Genomics England Research Consortium, Jones WD, Balestrini S, Sisodiya SM.		Silvennoinen K	Epilepsia Open	2021			10.1002/epi4.12525
31730442	Late sodium current blocker GS967 inhibits persistent currents induced by familial hemiplegic migraine type 3 mutations of the SCN1A gene	Barbieri R, Bertelli S, Pusch M, Gavazzo P.		Barbieri R	J Headache Pain	2019	PMC6858687		10.1186/s10194-019-1056-2
28328123	Lawsuit raises questions about variant interpretation and communication: Ambiguity of lab and clinician roles could be at issue if case proceeds				Am J Med Genet A	2017			10.1002/ajmg.a.38223
21527392	Leber's hereditary optic neuropathy mutations associated with infantile-onset myoclonic epilepsy	Frye RE.		Frye RE	J Child Neurol	2011			10.1177/0883073810391531
24860703	Linking a genetic defect in migraine to spreading depression in a computational model	Dahlem MA, Schumacher J, H¨¹bel N.		Dahlem MA	PeerJ	2014	PMC4017887		10.7717/peerj.379
8062593	Localization of a putative human brain sodium channel gene (SCN1A) to chromosome band 2q24	Malo MS, Blanchard BJ, Andresen JM, Srivastava K, Chen XN, Li X, Jabs EW, Korenberg JR, Ingram VM.		Malo MS	Cytogenet Cell Genet	1994			10.1159/000133818
16966585	Localization of Na+ channel isoforms at the atrioventricular junction and atrioventricular node in the rat	Yoo S, Dobrzynski H, Fedorov VV, Xu SZ, Yamanushi TT, Jones SA, Yamamoto M, Nikolski VP, Efimov IR, Boyett MR.		Yoo S	Circulation	2006			10.1161/CIRCULATIONAHA.106.613182
30870727	Longitudinal change of cardiac electrical and autonomic function and potential risk factors in children with dravet syndrome	Lyu SY, Nam SO, Lee YJ, Kim G, Kim YA, Kong J, Ko A, Kim YM, Yeon GM.		Lyu SY	Epilepsy Res	2019			10.1016/j.eplepsyres.2019.02.018
34692895	Long-term Efficacy of Perampanel in a Child with Dravet Syndrome	Tur¨®n-Vi?as E, D¨ªaz-G¨®mez A, Coca E, Dougherty L, Ruiz C, Boronat S.		Tur¨®n-Vi?as E	Child Neurol Open	2021	PMC8532213		10.1177/2329048X211050711
19306853	Long-term increasing co-localization of SCN8A and ankyrin-G in rat hippocampal cornu ammonis 1 after pilocarpine induced status epilepticus	Chen Z, Chen S, Chen L, Zhou J, Dai Q, Yang L, Li X, Zhou L.		Chen Z	Brain Res	2009			10.1016/j.brainres.2009.03.012
26647834	Loss of synaptic Zn2+ transporter function increases risk of febrile seizures	Hildebrand MS, Phillips AM, Mullen SA, Adlard PA, Hardies K, Damiano JA, Wimmer V, Bellows ST, McMahon JM, Burgess R, Hendrickx R, Weckhuysen S, Suls A, De Jonghe P, Scheffer IE, Petrou S, Berkovic SF, Reid CA.		Hildebrand MS	Sci Rep	2015	PMC4673435		10.1038/srep17816
34002542	Loss-of-function variants in K(v) 11.1 cardiac channels as a biomarker for SUDEP	Soh MS, Bagnall RD, Bennett MF, Bleakley LE, Mohamed Syazwan ES, Phillips AM, Chiam MDF, McKenzie CE, Hildebrand M, Crompton D, Bahlo M, Semsarian C, Scheffer IE, Berkovic SF, Reid CA.		Soh MS	Ann Clin Transl Neurol	2021	PMC8283159		10.1002/acn3.51381
23916143	Low incidence of SCN1A genetic mutation in patients with hemiconvulsion-hemiplegia-epilepsy syndrome	Kim DW, Lim BC, Kim KJ, Chae JH, Lee R, Lee SK.		Kim DW	Epilepsy Res	2013			10.1016/j.eplepsyres.2013.06.012
21620771	Low long-term efficacy and tolerability of add-on rufinamide in patients with Dravet syndrome	Mueller A, Boor R, Coppola G, Striano P, Dahlin M, von Stuelpnagel C, Lotte J, Staudt M, Kluger G.		Mueller A	Epilepsy Behav	2011			10.1016/j.yebeh.2011.04.057
26600876	Low-dose fenfluramine in the treatment of neurologic disorders: experience in Dravet syndrome	Schoonjans AS, Lagae L, Ceulemans B.		Schoonjans AS	Ther Adv Neurol Disord	2015	PMC4643872		10.1177/1756285615607726
20133610	Mammalian Pumilio 2 regulates dendrite morphogenesis and synaptic function	Vessey JP, Schoderboeck L, Gingl E, Luzi E, Riefler J, Di Leva F, Karra D, Thomas S, Kiebler MA, Macchi P.		Vessey JP	Proc Natl Acad Sci U S A	2010	PMC2840302		10.1073/pnas.0907128107
20187861	Management of sporadic and familial hemiplegic migraine	Russell MB.		Russell MB	Expert Rev Neurother	2010			10.1586/ern.09.127
24152123	Mapping genetic modifiers of survival in a mouse model of Dravet syndrome	Miller AR, Hawkins NA, McCollom CE, Kearney JA.		Miller AR	Genes Brain Behav	2014	PMC3930200	NIHMS551698	10.1111/gbb.12099
27690330	Mapping of a FEB3 homologous febrile seizure locus on mouse chromosome 2 containing candidate genes Scn1a and Scn3a	Hessel EV, van Lith HA, Wolterink-Donselaar IG, de Wit M, Groot Koerkamp MJ, Holstege FC, Kas MJ, Fernandes C, de Graan PN.		Hessel EV	Eur J Neurosci	2016			10.1111/ejn.13420
31393404	Mapping the knowledge structure and trends of epilepsy genetics over the past decade: A co-word analysis based on medical subject headings terms	Gan J, Cai Q, Galer P, Ma D, Chen X, Huang J, Bao S, Luo R.		Gan J	Medicine (Baltimore)	2019	PMC6709143		10.1097/MD.0000000000016782
25885068	Maternal germinal mosaicism for SCN1A in sibs with a mild form of Dravet syndrome	Guala A, Peruzzi C, Gennaro E, Pennese L, Danesino C.		Guala A	Am J Med Genet A	2015			10.1002/ajmg.a.36990
21940124	Maturation of EEG oscillations in children with sodium channel mutations	Holmes GL, Bender AC, Wu EX, Scott RC, Lenck-Santini PP, Morse RP.		Holmes GL	Brain Dev	2012	PMC3278588	NIHMS327809	10.1016/j.braindev.2011.08.009
28433711	MDH2 is an RNA binding protein involved in downregulation of sodium channel Scn1a expression under seizure condition	Chen YH, Liu SJ, Gao MM, Zeng T, Lin GW, Tan NN, Tang HL, Lu P, Su T, Sun WW, Xie LC, Yi YH, Long YS.		Chen YH	Biochim Biophys Acta Mol Basis Dis	2017			10.1016/j.bbadis.2017.04.018
20522430	Mechanisms for variable expressivity of inherited SCN1A mutations causing Dravet syndrome	Depienne C, Trouillard O, Gourfinkel-An I, Saint-Martin C, Bouteiller D, Graber D, Barthez-Carpentier MA, Gautier A, Villeneuve N, Dravet C, Livet MO, Rivier-Ringenbach C, Adam C, Dupont S, Baulac S, H¨¦ron D, Nabbout R, Leguern E.		Depienne C	J Med Genet	2010			10.1136/jmg.2009.074328
25194485	Mechanisms underlying epilepsies associated with sodium channel mutations	Steinlein OK.		Steinlein OK	Prog Brain Res	2014			10.1016/B978-0-444-63326-2.00005-3
20498617	Mechanisms underlying off-target effects of the cholesteryl ester transfer protein inhibitor torcetrapib involve L-type calcium channels	Clerc RG, Stauffer A, Weibel F, Hainaut E, Perez A, Hoflack JC, B¨¦nardeau A, Pflieger P, Garriz JM, Funder JW, Capponi AM, Niesor EJ.		Clerc RG	J Hypertens	2010			10.1097/HJH.0b013e32833b1f8e
22532537	Mesial temporal sclerosis in a cohort of children with SCN1A gene mutation	Van Poppel K, Patay Z, Roberts D, Clarke DF, McGregor A, Perkins FF, Wheless JW.		Van Poppel K	J Child Neurol	2012			10.1177/0883073811435325
23504252	Mesial temporal sclerosis in children with SCN1A mutation	Siegler Z, Fogarasi A.		Siegler Z	J Child Neurol	2013			10.1177/0883073812473365
30117335	Mesial Temporal Sclerosis in SCN1A-Related Epilepsy: Two Long-Term EEG Case Studies	Tiefes AM, Hartlieb T, Tacke M, von St¨¹lpnagel-Steinbeis C, Larsen LHG, Hao Q, Dahl HA, Neubauer BA, Gerstl L, Kudernatsch M, Kluger GJ, Borggraefe I.		Tiefes AM	Clin EEG Neurosci	2019			10.1177/1550059418794347
34223647	Metabolomic signature of the Dravet syndrome: A genetic mouse model study	Miljanovic N, van Dijk RM, Buchecker V, Potschka H.		Miljanovic N	Epilepsia	2021			10.1111/epi.16976
25154505	Methylphenidate improves learning impairments and hyperthermia-induced seizures caused by an Scn1a mutation	Ohmori I, Kawakami N, Liu S, Wang H, Miyazaki I, Asanuma M, Michiue H, Matsui H, Mashimo T, Ouchida M.		Ohmori I	Epilepsia	2014			10.1111/epi.12750
15102918	Mice lacking sodium channel beta1 subunits display defects in neuronal excitability, sodium channel expression, and nodal architecture	Chen C, Westenbroek RE, Xu X, Edwards CA, Sorenson DR, Chen Y, McEwen DP, O'Malley HA, Bharucha V, Meadows LS, Knudsen GA, Vilaythong A, Noebels JL, Saunders TL, Scheuer T, Shrager P, Catterall WA, Isom LL.		Chen C	J Neurosci	2004	PMC6729427		10.1523/JNEUROSCI.4139-03.2004
18479393	Microchromosomal deletions involving SCN1A and adjacent genes in severe myoclonic epilepsy in infancy	Wang JW, Kurahashi H, Ishii A, Kojima T, Ohfu M, Inoue T, Ogawa A, Yasumoto S, Oguni H, Kure S, Fujii T, Ito M, Okuno T, Shirasaka Y, Natsume J, Hasegawa A, Konagaya A, Kaneko S, Hirose S.		Wang JW	Epilepsia	2008			10.1111/j.1528-1167.2008.01609.x
16865694	Microdeletions involving the SCN1A gene may be common in SCN1A-mutation-negative SMEI patients	Suls A, Claeys KG, Goossens D, Harding B, Van Luijk R, Scheers S, Deprez L, Audenaert D, Van Dyck T, Beeckmans S, Smouts I, Ceulemans B, Lagae L, Buyse G, Barisic N, Misson JP, Wauters J, Del-Favero J, De Jonghe P, Claes LR.		Suls A	Hum Mutat	2006			10.1002/humu.20350
30885820	MicroRNA-132 regulates total protein of Nav1.1 and Nav1.2 in the hippocampus and cortex of rat with chronic cerebral hypoperfusion	Hu XL, Wang XX, Zhu YM, Xuan LN, Peng LW, Liu YQ, Yang H, Yang C, Jiao L, Hang PZ, Sun LH.		Hu XL	Behav Brain Res	2019			10.1016/j.bbr.2019.03.026
26259688	MicroRNA-9 induces defective trafficking of Nav1.1 and Nav1.2 by targeting Nav¦Â2 protein coding region in rat with chronic brain hypoperfusion	Sun LH, Yan ML, Hu XL, Peng LW, Che H, Bao YN, Guo F, Liu T, Chen X, Zhang R, Ban T, Wang N, Liu HL, Hou X, Ai J.		Sun LH	Mol Neurodegener	2015	PMC4530481		10.1186/s13024-015-0032-9
20495966	Migraine and epilepsy: a focus on overlapping clinical, pathophysiological, molecular, and therapeutic aspects	Bianchin MM, Londero RG, Lima JE, Bigal ME.		Bianchin MM	Curr Pain Headache Rep	2010			10.1007/s11916-010-0121-y
18759542	Migraine and epilepsy: genetically linked?	Haan J, van den Maagdenberg AM, Brouwer OF, Ferrari MD.		Haan J	Expert Rev Neurother	2008			10.1586/14737175.8.9.1307
22787613	Migraine and Epilepsy¡ªShared Mechanisms within the Family of Episodic Disorders	Rogawski MA.		Rogawski MA	Jasper's Basic Mechanisms of the Epilepsies	2012
23919895	Migraine genetics: Part II	Silberstein SD, Dodick DW.		Silberstein SD	Headache	2013			10.1111/head.12169
27127758	Migraine in the era of precision medicine	Zhang LM, Dong Z, Yu SY.		Zhang LM	Ann Transl Med	2016	PMC4828749		10.21037/atm.2016.03.13
30027842	Migraine: Genetic Variants and Clinical Phenotypes	Rainero I, Vacca A, Govone F, Gai A, Pinessi L, Rubino E.		Rainero I	Curr Med Chem	2019			10.2174/0929867325666180719120215
21855646	Migraine: Role of the TRESK two-pore potassium channel	Lafreni¨¨re RG, Rouleau GA.		Lafreni¨¨re RG	Int J Biochem Cell Biol	2011			10.1016/j.biocel.2011.08.002
22807908	Migraine-induced epistaxis and sporadic hemiplegic migraine: unusual features in the same patient	Barros J, Dam¨¢sio J, Tuna A, Pereira-Monteiro J.		Barros J	Case Rep Neurol	2012	PMC3398094		10.1159/000339824
16866717	Migrainous vertigo: mutation analysis of the candidate genes CACNA1A, ATP1A2, SCN1A, and CACNB4	von Brevern M, Ta N, Shankar A, Wiste A, Siegel A, Radtke A, Sander T, Escayg A.		von Brevern M	Headache	2006			10.1111/j.1526-4610.2006.00504.x
23599387	Migrating partial seizures of infancy: expansion of the electroclinical, radiological and pathological disease spectrum	McTague A, Appleton R, Avula S, Cross JH, King MD, Jacques TS, Bhate S, Cronin A, Curran A, Desurkar A, Farrell MA, Hughes E, Jefferson R, Lascelles K, Livingston J, Meyer E, McLellan A, Poduri A, Scheffer IE, Spinty S, Kurian MA, Kneen R.		McTague A	Brain	2013	PMC3634200		10.1093/brain/awt073
20630778	Milder phenotype with SCN1A truncation mutation other than SMEI	Yu MJ, Shi YW, Gao MM, Deng WY, Liu XR, Chen L, Long YS, Yi YH, Liao WP.		Yu MJ	Seizure	2010			10.1016/j.seizure.2010.06.010
34365140	miRNAomics analysis reveals the promoting effects of cigarette smoke extract-treated Beas-2B-derived exosomes on macrophage polarization	Chen Z, Wu H, Shi R, Fan W, Zhang J, Su W, Wang Y, Li P.		Chen Z	Biochem Biophys Res Commun	2021			10.1016/j.bbrc.2021.07.093
19783390	Missense mutation of the sodium channel gene SCN2A causes Dravet syndrome	Shi X, Yasumoto S, Nakagawa E, Fukasawa T, Uchiya S, Hirose S.		Shi X	Brain Dev	2009			10.1016/j.braindev.2009.08.009
26311622	Missense mutations in sodium channel SCN1A and SCN2A predispose children to encephalopathy with severe febrile seizures	Saitoh M, Ishii A, Ihara Y, Hoshino A, Terashima H, Kubota M, Kikuchi K, Yamanaka G, Amemiya K, Hirose S, Mizuguchi M.		Saitoh M	Epilepsy Res	2015			10.1016/j.eplepsyres.2015.08.001
26169758	Mitochondrial respiratory chain defects in skin fibroblasts from patients with Dravet syndrome	Doccini S, Meschini MC, Mei D, Guerrini R, Sicca F, Santorelli FM.		Doccini S	Neurol Sci	2015			10.1007/s10072-015-2324-9
26843603	Model systems for studying cellular mechanisms of SCN1A-related epilepsy	Schutte SS, Schutte RJ, Barragan EV, O'Dowd DK.		Schutte SS	J Neurophysiol	2016	PMC4819066		10.1152/jn.00824.2015
23773995	Modeling Dravet syndrome using induced pluripotent stem cells (iPSCs) and directly converted neurons	Jiao J, Yang Y, Shi Y, Chen J, Gao R, Fan Y, Yao H, Liao W, Sun XF, Gao S.		Jiao J	Hum Mol Genet	2013			10.1093/hmg/ddt275
34314446	Modeling NaV1.1/SCN1A sodium channel mutations in a microcircuit with realistic ion concentration dynamics suggests differential GABAergic mechanisms leading to hyperexcitability in epilepsy and hemiplegic migraine	Lemaire L, Desroches M, Krupa M, Pizzamiglio L, Scalmani P, Mantegazza M.		Lemaire L	PLoS Comput Biol	2021	PMC8345895		10.1371/journal.pcbi.1009239
32032478	Modifier genes in SCN1A-related epilepsy syndromes	de Lange IM, Mulder F, van 't Slot R, Sonsma ACM, van Kempen MJA, Nijman IJ, Ernst RF, Knoers NVAM, Brilstra EH, Koeleman BPC.		de Lange IM	Mol Genet Genomic Med	2020	PMC7196470		10.1002/mgg3.1103
32761786	Modulation of GABAergic dysfunction due to SCN1A mutation linked to Hippocampal Sclerosis	Ruffolo G, Martinello K, Labate A, Cifelli P, Fucile S, Di Gennaro G, Quattrone A, Esposito V, Limatola C, Giangaspero F, Aronica E, Palma E, Gambardella A.		Ruffolo G	Ann Clin Transl Neurol	2020	PMC7480916		10.1002/acn3.51150
17928445	Modulatory proteins can rescue a trafficking defective epileptogenic Nav1.1 Na+ channel mutant	Rusconi R, Scalmani P, Cassulini RR, Giunti G, Gambardella A, Franceschetti S, Annesi G, Wanke E, Mantegazza M.		Rusconi R	J Neurosci	2007	PMC6672853		10.1523/JNEUROSCI.3515-07.2007
18192366	Molecular and biophysical properties of voltage-gated Na+ channels in murine vas deferens	Zhu HL, Aishima M, Morinaga H, Wassall RD, Shibata A, Iwasa K, Nomura M, Nagao M, Sueishi K, Cunnane TC, Teramoto N.		Zhu HL	Biophys J	2008	PMC2275690		10.1529/biophysj.107.117192
21463284	Molecular and cellular basis: insights from experimental models of Dravet syndrome	Yamakawa K.		Yamakawa K	Epilepsia	2011			10.1111/j.1528-1167.2011.03006.x
19607678	Molecular and functional characterization of voltage-gated sodium channels in human sperm	Pinto FM, Ravina CG, Fern¨¢ndez-S¨¢nchez M, Gallardo-Castro M, Cejudo-Rom¨¢n A, Candenas L.		Pinto FM	Reprod Biol Endocrinol	2009	PMC2724540		10.1186/1477-7827-7-71
12374766	Molecular and pathological effects of a modifier gene on deficiency of the sodium channel Scn8a (Na(v)1.6)	Kearney JA, Buchner DA, De Haan G, Adamska M, Levin SI, Furay AR, Albin RL, Jones JM, Montal M, Stevens MJ, Sprunger LK, Meisler MH.		Kearney JA	Hum Mol Genet	2002			10.1093/hmg/11.22.2765
23485646	Molecular aspects of Dravet syndrome patients in Taiwan	Lin WD, Chang KP, Wang CH, Chen SJ, Fan PC, Weng WC, Lin WC, Tsai Y, Tsai CH, Chou IC, Tsai FJ.		Lin WD	Clin Chim Acta	2013			10.1016/j.cca.2013.02.015
12086636	Molecular basis of an inherited epilepsy	Lossin C, Wang DW, Rhodes TH, Vanoye CG, George AL Jr.		Lossin C	Neuron	2002			10.1016/s0896-6273(02)00714-6
19203854	Molecular basis of severe myoclonic epilepsy in infancy	Yamakawa K.		Yamakawa K	Brain Dev	2009			10.1016/j.braindev.2008.11.015
22178301	Molecular biology of epilepsy genes	Williams CA, Battaglia A.		Williams CA	Exp Neurol	2013			10.1016/j.expneurol.2011.12.001
20590641	Molecular determinants of state-dependent block of voltage-gated sodium channels by pilsicainide	Desaphy JF, Dipalma A, Costanza T, Bruno C, Lentini G, Franchini C, George A, Conte Camerino D.		Desaphy JF	Br J Pharmacol	2010	PMC2938822		10.1111/j.1476-5381.2010.00816.x
32702657	Molecular diagnosis of epileptic encephalopathy of the first year of life applying a customized gene panel in a group of Argentinean patients	Juanes M, Veneruzzo G, Loos M, Reyes G, Araoz HV, Garcia FM, Gomez G, Alonso CN, Chertkoff LP, Caraballo R.		Juanes M	Epilepsy Behav	2020			10.1016/j.yebeh.2020.107322
29190809	Molecular diagnosis of patients with epilepsy and developmental delay using a customized panel of epilepsy genes	Ortega-Moreno L, Gir¨¢ldez BG, Soto-Insuga V, Losada-Del Pozo R, Rodrigo-Moreno M, Alarc¨®n-Morcillo C, S¨¢nchez-Mart¨ªn G, D¨ªaz-G¨®mez E, Guerrero-L¨®pez R, Serratosa JM; Grupo Espa?ol de Gen¨¦tica de las Epilepsias de la Infancia (GEGEI).		Ortega-Moreno L	PLoS One	2017	PMC5708701		10.1371/journal.pone.0188978
16750188	Molecular diversity of voltage-gated sodium channel alpha and beta subunit mRNAs in human tissues	Candenas L, Seda M, Noheda P, Buschmann H, Cintado CG, Martin JD, Pinto FM.		Candenas L	Eur J Pharmacol	2006			10.1016/j.ejphar.2006.04.025
30034362	Molecular Genetic Characterization of Patients With Focal Epilepsy Using a Customized Targeted Resequencing Gene Panel	Tsai MH, Chan CK, Chang YC, Lin CH, Liou CW, Chang WN, Ng CC, Lim KS, Hwang DY.		Tsai MH	Front Neurol	2018	PMC6043663		10.3389/fneur.2018.00515
21504425	Molecular genetics of Dravet syndrome	De Jonghe P.		De Jonghe P	Dev Med Child Neurol	2011			10.1111/j.1469-8749.2011.03965.x
28615892	Molecular Genetics of Epilepsy: A Clinician's Perspective	Dhiman V.		Dhiman V	Ann Indian Acad Neurol	2017	PMC5470162		10.4103/aian.AIAN_447_16
16887333	Molecular genetics of febrile seizures	Nakayama J, Arinami T.		Nakayama J	Epilepsy Res	2006			10.1016/j.eplepsyres.2005.11.023
12383277	Molecular genetics of febrile seizures	Iwasaki N, Nakayama J, Hamano K, Matsui A, Arinami T.		Iwasaki N	Epilepsia	2002			10.1046/j.1528-1157.43.s.9.8.x
17049761	Molecular genetics of infantile nervous system channelopathies	Gardiner M.		Gardiner M	Early Hum Dev	2006			10.1016/j.earlhumdev.2006.09.013
19455354	Molecular genetics of migraine	de Vries B, Frants RR, Ferrari MD, van den Maagdenberg AM.		de Vries B	Hum Genet	2009			10.1007/s00439-009-0684-z
20466935	Molecular identity of dendritic voltage-gated sodium channels	Lorincz A, Nusser Z.		Lorincz A	Science	2010	PMC3546315	EMS51074	10.1126/science.1187958
21734302	Molecular microdomains in a sensory terminal, the vestibular calyx ending	Lysakowski A, Gaboyard-Niay S, Calin-Jageman I, Chatlani S, Price SD, Eatock RA.		Lysakowski A	J Neurosci	2011	PMC3276652	NIHMS309840	10.1523/JNEUROSCI.0521-11.2011
26371886	Molecular Profiling of a Rare Rosette-Forming Glioneuronal Tumor Arising in the Spinal Cord	Bidinotto LT, Scapulatempo-Neto C, Mackay A, de Almeida GC, Scheithauer BW, Berardinelli GN, Torrieri R, Clara CA, Feltrin LT, Viana-Pereira M, Varella-Garcia M, Jones C, Reis RM.		Bidinotto LT	PLoS One	2015	PMC4570813		10.1371/journal.pone.0137690
24041236	Monozygotic twin sisters discordant for familial hemiplegic migraine	Barros J, Barreto R, Brand?o AF, Domingos J, Dam¨¢sio J, Ramos C, Lemos C, Sequeiros J, Alonso I, Pereira-Monteiro J.		Barros J	J Headache Pain	2013	PMC3848118		10.1186/1129-2377-14-77
18639757	Monozygotic twins with severe myoclonic epilepsy in infancy discordant for clinical features	Miyama S, Goto T, Inoue Y, Yamakawa K.		Miyama S	Pediatr Neurol	2008			10.1016/j.pediatrneurol.2008.04.003
27810515	Mortality in Dravet syndrome	Cooper MS, Mcintosh A, Crompton DE, McMahon JM, Schneider A, Farrell K, Ganesan V, Gill D, Kivity S, Lerman-Sagie T, McLellan A, Pelekanos J, Ramesh V, Sadleir L, Wirrell E, Scheffer IE.		Cooper MS	Epilepsy Res	2016			10.1016/j.eplepsyres.2016.10.006
27732919	Mortality in Dravet syndrome: A review	Shmuely S, Sisodiya SM, Gunning WB, Sander JW, Thijs RD.		Shmuely S	Epilepsy Behav	2016			10.1016/j.yebeh.2016.09.007
21463280	Mortality in Dravet syndrome: search for risk factors in Japanese patients	Sakauchi M, Oguni H, Kato I, Osawa M, Hirose S, Kaneko S, Takahashi Y, Takayama R, Fujiwara T.		Sakauchi M	Epilepsia	2011			10.1111/j.1528-1167.2011.03002.x
26716362	Mosaic mutations in early-onset genetic diseases	Halvorsen M, Petrovski S, Shellhaas R, Tang Y, Crandall L, Goldstein D, Devinsky O.		Halvorsen M	Genet Med	2016	PMC4929028	NIHMS766156	10.1038/gim.2015.155
17054697	Mosaic SCN1A mutation in familial severe myoclonic epilepsy of infancy	Marini C, Mei D, Helen Cross J, Guerrini R.		Marini C	Epilepsia	2006			10.1111/j.1528-1167.2006.00675.x
22151702	Mosaic SCN1A mutations in familial partial epilepsy with antecedent febrile seizures	Shi YW, Yu MJ, Long YS, Qin B, He N, Meng H, Liu XR, Deng WY, Gao MM, Yi YH, Li BM, Liao WP.		Shi YW	Genes Brain Behav	2012			10.1111/j.1601-183X.2011.00756.x
20562086	Mosaicism of a missense SCN1A mutation and Dravet syndrome in a Roma/Gypsy family	Azmanov DN, Zhelyazkova S, Dimova PS, Radionova M, Bojinova V, Florez L, Smith SJ, Tournev I, Jablensky A, Mulley J, Scheffer I, Kalaydjieva L, Sander JW.		Azmanov DN	Epileptic Disord	2010			10.1684/epd.2010.0311
29460957	Mosaicism of de novo pathogenic SCN1A variants in epilepsy is a frequent phenomenon that correlates with variable phenotypes	de Lange IM, Koudijs MJ, van 't Slot R, Gunning B, Sonsma ACM, van Gemert LJJM, Mulder F, Carbo EC, van Kempen MJA, Verbeek NE, Nijman IJ, Ernst RF, Savelberg SMC, Knoers NVAM, Brilstra EH, Koeleman BPC.		de Lange IM	Epilepsia	2018			10.1111/epi.14021
27316242	Motor neuropathy contributes to crouching in patients with Dravet syndrome	Gitiaux C, Chemaly N, Quijano-Roy S, Barnerias C, Desguerre I, Hully M, Chiron C, Dulac O, Nabbout R.		Gitiaux C	Neurology	2016			10.1212/WNL.0000000000002859
22986304	Mouse with Nav1.1 haploinsufficiency, a model for Dravet syndrome, exhibits lowered sociability and learning impairment	Ito S, Ogiwara I, Yamada K, Miyamoto H, Hensch TK, Osawa M, Yamakawa K.		Ito S	Neurobiol Dis	2013			10.1016/j.nbd.2012.08.003
28126647	Movement-activated cortical myoclonus in Dravet syndrome	Canafoglia L, Ragona F, Panzica F, Piazza E, Freri E, Binelli S, Scaioli V, Avanzini G, Granata T, Franceschetti S.		Canafoglia L	Epilepsy Res	2017			10.1016/j.eplepsyres.2017.01.007
33478845	Multicenter prospective longitudinal study in 34 patients with Dravet syndrome: Neuropsychological development in the first six years of life	Battaglia D, Chieffo D, Lucibello S, Marini C, Sibilia V, Mei D, Darra F, Offredi F, Fontana E, Specchio N, Cappelletti S, Granata T, Ragona F, Patrini M, Baglietto MG, Prato G, Ferrari A, Vigevano F, Mercuri E, Bernardina BD, Guerrini R, Dravet C, Guzzetta F.		Battaglia D	Brain Dev	2021			10.1016/j.braindev.2020.10.004
18784617	Multidrug resistance in epilepsy and polymorphisms in the voltage-gated sodium channel genes SCN1A, SCN2A, and SCN3A: correlation among phenotype, genotype, and mRNA expression	Kwan P, Poon WS, Ng HK, Kang DE, Wong V, Ng PW, Lui CH, Sin NC, Wong KS, Baum L.		Kwan P	Pharmacogenet Genomics	2008			10.1097/FPC.0b013e3283117d67
31001185	Multimodal Analysis of SCN1A Missense Variants Improves Interpretation of Clinically Relevant Variants in Dravet Syndrome	Gonsales MC, Montenegro MA, Preto P, Guerreiro MM, Coan AC, Quast MP, Carvalho BS, Lopes-Cendes I.		Gonsales MC	Front Neurol	2019	PMC6455056		10.3389/fneur.2019.00289
26802095	Multiplex families with epilepsy: Success of clinical and molecular genetic characterization	Afawi Z, Oliver KL, Kivity S, Mazarib A, Blatt I, Neufeld MY, Helbig KL, Goldberg-Stern H, Misk AJ, Straussberg R, Walid S, Mahajnah M, Lerman-Sagie T, Ben-Zeev B, Kahana E, Masalha R, Kramer U, Ekstein D, Shorer Z, Wallace RH, Mangelsdorf M, MacPherson JN, Carvill GL, Mefford HC, Jackson GD, Scheffer IE, Bahlo M, Gecz J, Heron SE, Corbett M, Mulley JC, Dibbens LM, Korczyn AD, Berkovic SF.		Afawi Z	Neurology	2016	PMC4763801		10.1212/WNL.0000000000002404
20080581	Multiplexed transposon-mediated stable gene transfer in human cells	Kahlig KM, Saridey SK, Kaja A, Daniels MA, George AL Jr, Wilson MH.		Kahlig KM	Proc Natl Acad Sci U S A	2010	PMC2824351		10.1073/pnas.0910383107
23517304	Musicogenic seizures in Dravet syndrome	Sanchez-Carpintero R, Pati?o-Garcia A, Urrestarazu E.		Sanchez-Carpintero R	Dev Med Child Neurol	2013			10.1111/dmcn.12138
17119788	Mutation analysis of CACNA1A and ATP1A2 genes in Brazilian FHM families	Lopes LR, Peres MF, Vanmolkot KR, Tobo PR, Zukerman E, Frants RR, van den Maagdenberg AM, Moreira-Filho CA.		Lopes LR	Arq Neuropsiquiatr	2006			10.1590/s0004-282x2006000400001
16054936	Mutation in the neuronal voltage-gated sodium channel SCN1A in familial hemiplegic migraine	Dichgans M, Freilinger T, Eckstein G, Babini E, Lorenz-Depiereux B, Biskup S, Ferrari MD, Herzog J, van den Maagdenberg AM, Pusch M, Strom TM.		Dichgans M	Lancet	2005			10.1016/S0140-6736(05)66786-4
18242854	Mutation of sodium channel SCN3A in a patient with cryptogenic pediatric partial epilepsy	Holland KD, Kearney JA, Glauser TA, Buck G, Keddache M, Blankston JR, Glaaser IW, Kass RS, Meisler MH.		Holland KD	Neurosci Lett	2008	PMC2423278	NIHMS42458	10.1016/j.neulet.2007.12.064
21704126	Mutation screening of three Chinese families with genetic epilepsy with febrile seizures plus	Lin H, Li J, Wang M, Wang Z, Wang Y, Wu L.		Lin H	Neurosci Lett	2011			10.1016/j.neulet.2011.06.018
31765958	Mutation spectrum of the SCN1A gene in a Hungarian population with epilepsy	Till ¨¢, Zima J, Fekete A, Bene J, Czak¨® M, Szab¨® A, Melegh B, Hadzsiev K.		Till ¨¢	Seizure	2020			10.1016/j.seizure.2019.10.019
19522081	Mutational analysis of the SCN1A, SCN1B and GABRG2 genes in 150 Italian patients with idiopathic childhood epilepsies	Orrico A, Galli L, Grosso S, Buoni S, Pianigiani R, Balestri P, Sorrentino V.		Orrico A	Clin Genet	2009			10.1111/j.1399-0004.2009.01155.x
16168594	Mutational scanning of potassium, sodium and chloride ion channels in malignant migrating partial seizures in infancy	Coppola G, Veggiotti P, Del Giudice EM, Bellini G, Longaretti F, Taglialatela M, Pascotto A.		Coppola G	Brain Dev	2006			10.1016/j.braindev.2005.05.002
29466837	Mutations in SCN3A cause early infantile epileptic encephalopathy	Zaman T, Helbig I, Bo?ovi? IB, DeBrosse SD, Bergqvist AC, Wallis K, Medne L, Maver A, Peterlin B, Helbig KL, Zhang X, Goldberg EM.		Zaman T	Ann Neurol	2018	PMC5912987	NIHMS945030	10.1002/ana.25188
25362483	Mutations in STX1B, encoding a presynaptic protein, cause fever-associated epilepsy syndromes	Schubert J, Siekierska A, Langlois M, May P, Huneau C, Becker F, Muhle H, Suls A, Lemke JR, de Kovel CG, Thiele H, Konrad K, Kawalia A, Toliat MR, Sander T, R¨¹schendorf F, Caliebe A, Nagel I, Kohl B, Kecsk¨¦s A, Jacmin M, Hardies K, Weckhuysen S, Riesch E, Dorn T, Brilstra EH, Baulac S, M?ller RS, Hjalgrim H, Koeleman BP; EuroEPINOMICS RES Consortium, Jurkat-Rott K, Lehman-Horn F, Roach JC, Glus…		Schubert J	Nat Genet	2014			10.1038/ng.3130
33895391	Mutations in the sodium channel genes SCN1A, SCN3A, and SCN9A in children with epilepsy with febrile seizures plus(EFS+)	Ma H, Guo Y, Chen Z, Wang L, Tang Z, Zhang J, Miao Q, Zhai Q.		Ma H	Seizure	2021			10.1016/j.seizure.2021.04.006
14738421	Mutations of neuronal voltage-gated Na+ channel alpha 1 subunit gene SCN1A in core severe myoclonic epilepsy in infancy (SMEI) and in borderline SMEI (SMEB)	Fukuma G, Oguni H, Shirasaka Y, Watanabe K, Miyajima T, Yasumoto S, Ohfu M, Inoue T, Watanachai A, Kira R, Matsuo M, Muranaka H, Sofue F, Zhang B, Kaneko S, Mitsudome A, Hirose S.		Fukuma G	Epilepsia	2004			10.1111/j.0013-9580.2004.15103.x
10742094	Mutations of SCN1A, encoding a neuronal sodium channel, in two families with GEFS+2	Escayg A, MacDonald BT, Meisler MH, Baulac S, Huberfeld G, An-Gourfinkel I, Brice A, LeGuern E, Moulard B, Chaigne D, Buresi C, Malafosse A.		Escayg A	Nat Genet	2000			10.1038/74159
12566275	Mutations of sodium channel alpha subunit type 1 (SCN1A) in intractable childhood epilepsies with frequent generalized tonic-clonic seizures	Fujiwara T, Sugawara T, Mazaki-Miyazaki E, Takahashi Y, Fukushima K, Watanabe M, Hara K, Morikawa T, Yagi K, Yamakawa K, Inoue Y.		Fujiwara T	Brain	2003			10.1093/brain/awg053
22309220	Mutations of the SCN1A gene in acute encephalopathy	Saitoh M, Shinohara M, Hoshino H, Kubota M, Amemiya K, Takanashi JL, Hwang SK, Hirose S, Mizuguchi M.		Saitoh M	Epilepsia	2012			10.1111/j.1528-1167.2011.03402.x
11771652	Mutations of voltage-gated sodium channels in movement disorders and epilepsy	Meisler MH, Kearney JA, Sprunger LK, MacDonald BT, Buchner DA, Escayg A.		Meisler MH	Novartis Found Symp	2002
28233668	Myoclonic Absence Seizures in Dravet Syndrome	Myers KA, Scheffer IE.		Myers KA	Pediatr Neurol	2017			10.1016/j.pediatrneurol.2017.01.004
15508917	Myoclonic seizures in the context of generalized epilepsy with febrile seizures plus (GEFS+)	Baulac M, Gourfinkel-An I, Baulac S, Leguern E.		Baulac M	Adv Neurol	2005
26232052	Myoclonus in childhood-onset neurogenetic disorders: The importance of early identification and treatment	van Egmond ME, Elting JW, Kuiper A, Zutt R, Heineman KR, Brouwer OF, Sival DA, Willemsen MA, Tijssen MA, de Koning TJ.		van Egmond ME	Eur J Paediatr Neurol	2015			10.1016/j.ejpn.2015.07.003
16806834	Na channel gene mutations in epilepsy--the functional consequences	Yamakawa K.		Yamakawa K	Epilepsy Res	2006			10.1016/j.eplepsyres.2005.11.025
22223655	Na(V)1.1 channels are critical for intercellular communication in the suprachiasmatic nucleus and for normal circadian rhythms	Han S, Yu FH, Schwartz MD, Linton JD, Bosma MM, Hurley JB, Catterall WA, de la Iglesia HO.		Han S	Proc Natl Acad Sci U S A	2012	PMC3277539		10.1073/pnas.1115729109
22111617	Na+ channelopathies and epilepsy: recent advances and new perspectives	Marini C, Mantegazza M.		Marini C	Expert Rev Clin Pharmacol	2010			10.1586/ecp.10.20
33189882	Nanoparticle encapsulated oxytocin increases resistance to induced seizures and restores social behavior in Scn1a-derived epilepsy	Wong JC, Shapiro L, Thelin JT, Heaton EC, Zaman RU, D'Souza MJ, Murnane KS, Escayg A.		Wong JC	Neurobiol Dis	2021	PMC7726060	NIHMS1647224	10.1016/j.nbd.2020.105147
21864321	Nav 1.1 dysfunction in genetic epilepsy with febrile seizures-plus or Dravet syndrome	Volkers L, Kahlig KM, Verbeek NE, Das JH, van Kempen MJ, Stroink H, Augustijn P, van Nieuwenhuizen O, Lindhout D, George AL Jr, Koeleman BP, Rook MB.		Volkers L	Eur J Neurosci	2011	PMC3195841	NIHMS310873	10.1111/j.1460-9568.2011.07826.x
32134913	NaV1.1 and NaV1.6 selective compounds reduce the behavior phenotype and epileptiform activity in a novel zebrafish model for Dravet Syndrome	Weuring WJ, Singh S, Volkers L, Rook MB, van 't Slot RH, Bosma M, Inserra M, Vetter I, Verhoeven-Duif NM, Braun KPJ, Rivara M, Koeleman BPC.		Weuring WJ	PLoS One	2020	PMC7058281		10.1371/journal.pone.0219106
20194124	NaV1.1 channels and epilepsy	Catterall WA, Kalume F, Oakley JC.		Catterall WA	J Physiol	2010	PMC2901973		10.1113/jphysiol.2010.187484
12837571	Nav1.1 channels with mutations of severe myoclonic epilepsy in infancy display attenuated currents	Sugawara T, Tsurubuchi Y, Fujiwara T, Mazaki-Miyazaki E, Nagata K, Montal M, Inoue Y, Yamakawa K.		Sugawara T	Epilepsy Res	2003			10.1016/s0920-1211(03)00084-6
23922229	Nav1.1 haploinsufficiency in excitatory neurons ameliorates seizure-associated sudden death in a mouse model of Dravet syndrome	Ogiwara I, Iwasato T, Miyamoto H, Iwata R, Yamagata T, Mazaki E, Yanagawa Y, Tamamaki N, Hensch TK, Itohara S, Yamakawa K.		Ogiwara I	Hum Mol Genet	2013	PMC3820136		10.1093/hmg/ddt331
29875317	NaV1.1 inhibition can reduce visceral hypersensitivity	Salvatierra J, Castro J, Erickson A, Li Q, Braz J, Gilchrist J, Grundy L, Rychkov GY, Deiteren A, Rais R, King GF, Slusher BS, Basbaum A, Pasricha PJ, Brierley SM, Bosmans F.		Salvatierra J	JCI Insight	2018	PMC6124407		10.1172/jci.insight.121000
18621130	Nav1.1 is predominantly expressed in nodes of Ranvier and axon initial segments	Duflocq A, Le Bras B, Bullier E, Couraud F, Davenne M.		Duflocq A	Mol Cell Neurosci	2008			10.1016/j.mcn.2008.06.008
17537961	Nav1.1 localizes to axons of parvalbumin-positive inhibitory interneurons: a circuit basis for epileptic seizures in mice carrying an Scn1a gene mutation	Ogiwara I, Miyamoto H, Morita N, Atapour N, Mazaki E, Inoue I, Takeuchi T, Itohara S, Yanagawa Y, Obata K, Furuichi T, Hensch TK, Yamakawa K.		Ogiwara I	J Neurosci	2007	PMC6672241		10.1523/JNEUROSCI.5270-06.2007
11524484	Nav1.1 mutations cause febrile seizures associated with afebrile partial seizures	Sugawara T, Mazaki-Miyazaki E, Ito M, Nagafuji H, Fukuma G, Mitsudome A, Wada K, Kaneko S, Hirose S, Yamakawa K.		Sugawara T	Neurology	2001			10.1212/wnl.57.4.703
29551491	Nav1.1-Overexpressing Interneuron Transplants Restore Brain Rhythms and Cognition in a Mouse Model of Alzheimer's Disease	Martinez-Losa M, Tracy TE, Ma K, Verret L, Clemente-Perez A, Khan AS, Cobos I, Ho K, Gan L, Mucke L, Alvarez-Dolado M, Palop JJ.		Martinez-Losa M	Neuron	2018	PMC5886814	NIHMS949148	10.1016/j.neuron.2018.02.029
28784306	Nav1.2 is expressed in caudal ganglionic eminence-derived disinhibitory interneurons: Mutually exclusive distributions of Nav1.1 and Nav1.2	Yamagata T, Ogiwara I, Mazaki E, Yanagawa Y, Yamakawa K.		Yamagata T	Biochem Biophys Res Commun	2017			10.1016/j.bbrc.2017.08.013
33651714	Neddylation stabilizes Nav1.1 to maintain interneuron excitability and prevent seizures in murine epilepsy models	Chen W, Luo B, Gao N, Li H, Wang H, Li L, Cui W, Zhang L, Sun D, Liu F, Dong Z, Ren X, Zhang H, Su H, Xiong WC, Mei L.		Chen W	J Clin Invest	2021	PMC8262483		10.1172/JCI136956
16359473	Neonatal epilepsy syndromes and GEFS+: mechanistic considerations	Burgess DL.		Burgess DL	Epilepsia	2005			10.1111/j.1528-1167.2005.00359.x
16359471	Neonatal epilepsy syndromes and generalized epilepsy with febrile seizures plus (GEFS+)	Scheffer IE, Harkin LA, Dibbens LM, Mulley JC, Berkovic SF.		Scheffer IE	Epilepsia	2005			10.1111/j.1528-1167.2005.00358.x
32454875	Network Pharmacology-Based Approach to Investigate the Mechanisms of Mahai Capsules in the Treatment of Cardiovascular Diseases	Shi M, Li B, Yuan Q, Gan X, Ren X, Jiang S, Liu Z.		Shi M	Evid Based Complement Alternat Med	2020	PMC7243029		10.1155/2020/9180982
19723564	Neuroimaging and neurogenetics of epilepsy in humans	Siniatchkin M, Koepp M.		Siniatchkin M	Neuroscience	2009			10.1016/j.neuroscience.2009.08.056
21463276	Neuroimaging and neuropathology of Dravet syndrome	Guerrini R, Striano P, Catarino C, Sisodiya SM.		Guerrini R	Epilepsia	2011			10.1111/j.1528-1167.2011.02998.x
11254444	Neuronal sodium-channel alpha1-subunit mutations in generalized epilepsy with febrile seizures plus	Wallace RH, Scheffer IE, Barnett S, Richards M, Dibbens L, Desai RR, Lerman-Sagie T, Lev D, Mazarib A, Brand N, Ben-Zeev B, Goikhman I, Singh R, Kremmidiotis G, Gardner A, Sutherland GR, George AL Jr, Mulley JC, Berkovic SF.		Wallace RH	Am J Hum Genet	2001	PMC1275639		10.1086/319516
21156207	Neuronal voltage-gated ion channels are genetic modifiers of generalized epilepsy with febrile seizures plus	Hawkins NA, Martin MS, Frankel WN, Kearney JA, Escayg A.		Hawkins NA	Neurobiol Dis	2011	PMC3035952	NIHMS259319	10.1016/j.nbd.2010.11.016
33584198	Neuropathological Characterization of a Dravet Syndrome Knock-In Mouse Model Useful for Investigating Cannabinoid Treatments	Satta V, Alonso C, D¨ªez P, Mart¨ªn-Su¨¢rez S, Rubio M, Encinas JM, Fern¨¢ndez-Ruiz J, Sagredo O.		Satta V	Front Mol Neurosci	2021	PMC7879984		10.3389/fnmol.2020.602801
21474289	Neuropsychological development in children with Dravet syndrome	Chieffo D, Battaglia D, Lettori D, Del Re M, Brogna C, Dravet C, Mercuri E, Guzzetta F.		Chieffo D	Epilepsy Res	2011			10.1016/j.eplepsyres.2011.03.005
22013243	Neurovascular changes in prolonged migraine aura in FHM with a novel ATP1A2 gene mutation	Iizuka T, Takahashi Y, Sato M, Yonekura J, Miyakawa S, Endo M, Hamada J, Kan S, Mochizuki H, Momose Y, Tsuji S, Sakai F.		Iizuka T	J Neurol Neurosurg Psychiatry	2012			10.1136/jnnp-2011-300843
32096222	New insights into the early?mechanisms of epileptogenesis in a zebrafish model of Dravet syndrome	Tiraboschi E, Martina S, van der Ent W, Grzyb K, Gawel K, Cordero-Maldonado ML, Poovathingal SK, Heintz S, Satheesh SV, Brattespe J, Xu J, Suster M, Skupin A, Esguerra CV.		Tiraboschi E	Epilepsia	2020			10.1111/epi.16456
25194493	New technologies in molecular genetics: the impact on epilepsy research	Helbig I.		Helbig I	Prog Brain Res	2014			10.1016/B978-0-444-63326-2.00013-2
18386309	New variants of Nav1.5/SCN5A encode Na+ channels in the brain	Wang J, Ou SW, Wang YJ, Zong ZH, Lin L, Kameyama M, Kameyama A.		Wang J	J Neurogenet	2008			10.1080/01677060701672077
32722525	Next Generation Sequencing of 134 Children with Autism Spectrum Disorder and Regression	Yin J, Chun CA, Zavadenko NN, Pechatnikova NL, Naumova OY, Doddapaneni HV, Hu J, Muzny DM, Schaaf CP, Grigorenko EL.		Yin J	Genes (Basel)	2020	PMC7463850		10.3390/genes11080853
27241786	Next-generation sequencing for diagnosis of rare diseases in the neonatal intensive care unit	Daoud H, Luco SM, Li R, Bareke E, Beaulieu C, Jarinova O, Carson N, Nikkel SM, Graham GE, Richer J, Armour C, Bulman DE, Chakraborty P, Geraghty M, Lines MA, Lacaze-Masmonteil T, Majewski J, Boycott KM, Dyment DA.		Daoud H	CMAJ	2016	PMC4978597		10.1503/cmaj.150823
25445412	NMR-based urinalysis for rapid diagnosis of ¦Â-ureidopropionase deficiency in a patient with Dravet syndrome	Lam CW, Law CY, Leung KF, Lai CK, Pak-lam Chen S, Chan B, Chan KY, Yuen YP, Mak CM, Yan-wo Chan A.		Lam CW	Clin Chim Acta	2015			10.1016/j.cca.2014.10.030
33216760	No association between SCN9A and monogenic human epilepsy disorders	Fasham J, Leslie JS, Harrison JW, Deline J, Williams KB, Kuhl A, Scott Schwoerer J, Cross HE, Crosby AH, Baple EL.		Fasham J	PLoS Genet	2020	PMC7717534		10.1371/journal.pgen.1009161
12694927	No evidence of GABRG2 mutations in severe myoclonic epilepsy of infancy	Madia F, Gennaro E, Cecconi M, Buti D, Capovilla G, Dalla Bernardina B, Elia M, Ferrari A, Fontana E, Gaggero R, Giannotta M, Giordano L, Granata T, La Selva L, Luisa Lispi M, Santucci M, Vanadia F, Veggiotti P, Vigliano P, Viri M, Dagna Bricarelli F, Bianchi A, Zara F.		Madia F	Epilepsy Res	2003			10.1016/s0920-1211(03)00022-6
34706024	Nodular heterotopia: a rare finding in patients with epilepsy and SCN1A mutation	Klettenberg MRP, Rodrigues VA, Bispo DDC, Cunha PEL, Ferreira LS.		Klettenberg MRP	Arq Neuropsiquiatr	2021			10.1590/0004-282X-ANP-2021-0084
24101488	Nonfunctional NaV1.1 familial hemiplegic migraine mutant transformed into gain of function by partial rescue of folding defects	Cest¨¨le S, Schiavon E, Rusconi R, Franceschetti S, Mantegazza M.		Cest¨¨le S	Proc Natl Acad Sci U S A	2013	PMC3808640		10.1073/pnas.1309827110
17054685	Nonfunctional SCN1A is common in severe myoclonic epilepsy of infancy	Ohmori I, Kahlig KM, Rhodes TH, Wang DW, George AL Jr.		Ohmori I	Epilepsia	2006			10.1111/j.1528-1167.2006.00643.x
15263074	Noninactivating voltage-gated sodium channels in severe myoclonic epilepsy of infancy	Rhodes TH, Lossin C, Vanoye CG, Wang DW, George AL Jr.		Rhodes TH	Proc Natl Acad Sci U S A	2004	PMC503754		10.1073/pnas.0402482101
23086956	Nontruncating SCN1A mutations associated with severe myoclonic epilepsy of infancy impair cell surface expression	Thompson CH, Porter JC, Kahlig KM, Daniels MA, George AL Jr.		Thompson CH	J Biol Chem	2012	PMC3516746		10.1074/jbc.M112.421883
28794249	Not all SCN1A epileptic encephalopathies are Dravet syndrome: Early profound Thr226Met phenotype	Sadleir LG, Mountier EI, Gill D, Davis S, Joshi C, DeVile C, Kurian MA; DDD Study, Mandelstam S, Wirrell E, Nickels KC, Murali HR, Carvill G, Myers CT, Mefford HC, Scheffer IE.		Sadleir LG	Neurology	2017	PMC5589790		10.1212/WNL.0000000000004331
17436242	Nova2 interacts with a cis-acting polymorphism to influence the proportions of drug-responsive splice variants of SCN1A	Heinzen EL, Yoon W, Tate SK, Sen A, Wood NW, Sisodiya SM, Goldstein DB.		Heinzen EL	Am J Hum Genet	2007	PMC1852745		10.1086/516650
31714027	Novel and de novo mutation of PCDH19 in Girls Clustering Epilepsy	Yang L, Liu J, Su Q, Li Y, Yang X, Xu L, Tong L, Li B.		Yang L	Brain Behav	2019	PMC6908879		10.1002/brb3.1455
30185235	Novel and de novo mutations in pediatric refractory epilepsy	Liu J, Tong L, Song S, Niu Y, Li J, Wu X, Zhang J, Zai CC, Luo F, Wu J, Li H, Wong AHC, Sun R, Liu F, Li B.		Liu J	Mol Brain	2018	PMC6125990		10.1186/s13041-018-0392-5
29588980	Novel bandlike signal abnormality suggestive of heterotopia in patient with a KCNQ1 frameshift mutation	Sabharwal P, Devinsky O, M Shepherd T.		Sabharwal P	Epilepsia Open	2017	PMC5862117		10.1002/epi4.12072
15797713	Novel clustering of sodium channel Na(v)1.1 with ankyrin-G and neurofascin at discrete sites in the inner plexiform layer of the retina	Van Wart A, Boiko T, Trimmer JS, Matthews G.		Van Wart A	Mol Cell Neurosci	2005			10.1016/j.mcn.2004.11.012
17903680	Novel de novo mutation of a conserved SCN1A amino-acid residue (R1596)	Dlugos DJ, Ferraro TN, Buono RJ.		Dlugos DJ	Pediatr Neurol	2007			10.1016/j.pediatrneurol.2007.06.008
23988467	Novel de novo SCN2A mutation in a child with migrating focal seizures of infancy	Dhamija R, Wirrell E, Falcao G, Kirmani S, Wong-Kisiel LC.		Dhamija R	Pediatr Neurol	2013			10.1016/j.pediatrneurol.2013.07.004
18632234	Novel de novo splice-site mutation of SCN1A in a patient with partial epilepsy with febrile seizures plus	Kumakura A, Ito M, Hata D, Oh N, Kurahashi H, Wang JW, Hirose S.		Kumakura A	Brain Dev	2009			10.1016/j.braindev.2008.06.001
21488258	Novel human pathological mutations. Gene symbol: SCN1A. Disease: generalized epilepsy with febrile seizures plus	Lin WD, Chou IC, Tsai FJ.		Lin WD	Hum Genet	2010
21488303	Novel human pathological mutations. Gene symbol: SCN1A. Disease: generalized epilepsy with febrile seizures plus	Chou IC, Lin WD, Tsai FJ.		Chou IC	Hum Genet	2010
21488261	Novel human pathological mutations. Gene symbol: SCN1A. Disease: generalized epilepsy with febrile seizures plus	Chou IC, Lin WD, Tsai FJ.		Chou IC	Hum Genet	2010
21488289	Novel human pathological mutations. Gene symbol: SCN1A. Disease: generalized epilepsy with febrile seizures plus	Lin WD, Chou IC, Tsai FJ.		Lin WD	Hum Genet	2010
20135149	Novel human pathological mutations. Gene symbol: SCN1A. Disease: Myoclonic epilepsy of infancy	Rocca FE, De Marco EV, Annesi F, Civitelli D, Provenzano G, Sproviero W, Scornaienchi V, Greco V, Tarantino P, Annesi G.		Rocca FE	Hum Genet	2010			10.1007/s00439-010-0788-5
19694011	Novel human pathological mutations. Gene symbol: SCN1A. Disease: severe myoclonic epilepsy of infancy	Provenzano G, Mannarino E, Annesi F, De Marco EV, Rocca FE, Greco V, Scornaienchi V, Tarantino P, Civitelli D, Quattrone A, Tortorella G, Annesi G.		Provenzano G	Hum Genet	2009
31586957	Novel missense mutation in the ATP1A2 gene associated with atypical sporapedic hemiplegic migraine	Rispoli MG, Di Stefano V, Mantuano E, De Angelis MV.		Rispoli MG	BMJ Case Rep	2019	PMC6781968		10.1136/bcr-2019-231129
18021921	Novel mutation confirms seizure locus SCN1A is also familial hemiplegic migraine locus FHM3	Gargus JJ, Tournay A.		Gargus JJ	Pediatr Neurol	2007	PMC2151385	NIHMS35035	10.1016/j.pediatrneurol.2007.06.016
20600615	Novel mutation of SCN1A in familial generalized epilepsy with febrile seizures plus	Li N, Zhang J, Guo JF, Yan XX, Xia K, Tang BS.		Li N	Neurosci Lett	2010			10.1016/j.neulet.2010.06.040
32062735	Novel mutation of SCN9A gene causing generalized epilepsy with febrile seizures plus in a Chinese family	Zhang T, Chen M, Zhu A, Zhang X, Fang T.		Zhang T	Neurol Sci	2020	PMC7359139		10.1007/s10072-020-04284-x
29314583	Novel mutations and phenotypes of epilepsy-associated genes in epileptic encephalopathies	Zhou P, He N, Zhang JW, Lin ZJ, Wang J, Yan LM, Meng H, Tang B, Li BM, Liu XR, Shi YW, Zhai QX, Yi YH, Liao WP.		Zhou P	Genes Brain Behav	2018			10.1111/gbb.12456
28540321	Novel SCN1A and GABRA1 Gene Mutations With Diverse Phenotypic Features and the Question on the Existence of a Broader Spectrum of Dravet Syndrome	Gontika MP, Konialis C, Pangalos C, Papavasiliou A.		Gontika MP	Child Neurol Open	2017	PMC5431609		10.1177/2329048X17706794
18680191	Novel SCN1A frameshift mutation with absence of truncated Nav1.1 protein in severe myoclonic epilepsy of infancy	McArdle EJ, Kunic JD, George AL Jr.		McArdle EJ	Am J Med Genet A	2008	PMC3708306	NIHMS491296	10.1002/ajmg.a.32448
21555645	Novel SCN1A mutation in a proband with malignant migrating partial seizures of infancy	Freilich ER, Jones JM, Gaillard WD, Conry JA, Tsuchida TN, Reyes C, Dib-Hajj S, Waxman SG, Meisler MH, Pearl PL.		Freilich ER	Arch Neurol	2011	PMC3092158	NIHMS284929	10.1001/archneurol.2011.98
19563458	Novel SCN1A mutations in Indonesian patients with severe myoclonic epilepsy in infancy	Herini ES, Gunadi, van Kempen MJ, Yusoff S, Sutaryo, Sunartini, Patria SY, Matsuo M, Lindhout D, Nishio H.		Herini ES	Pediatr Int	2010			10.1111/j.1442-200X.2009.02916.x
27045673	Novel SCN1A variants in Dravet syndrome and evaluating a wide approach of patient selection	Surovy M, Soltysova A, Kolnikova M, Sykora P, Ilencikova D, Ficek A, Radvanszky J, Kadasi L.		Surovy M	Gen Physiol Biophys	2016			10.4149/gpb_2016002
24157691	Novel SCN3A variants associated with focal epilepsy in children	Vanoye CG, Gurnett CA, Holland KD, George AL Jr, Kearney JA.		Vanoye CG	Neurobiol Dis	2014	PMC3877720	NIHMS534291	10.1016/j.nbd.2013.10.015
15741513	novoSNP, a novel computational tool for sequence variation discovery	Weckx S, Del-Favero J, Rademakers R, Claes L, Cruts M, De Jonghe P, Van Broeckhoven C, De Rijk P.		Weckx S	Genome Res	2005	PMC551570		10.1101/gr.2754005
22206733	On the likelihood of SCN1A microdeletions or duplications in Dravet syndrome with missense mutation	Shi X, Wang J, Kurahashi H, Ishii A, Higurashi N, Kaneko S, Hirose S.		Shi X	Brain Dev	2012			10.1016/j.braindev.2011.11.005
21396429	One novel Dravet syndrome causing mutation and one recurrent MAE causing mutation in SCN1A gene	Yordanova I, Todorov T, Dimova P, Hristova D, Tincheva R, Litvinenko I, Yotovska O, Kremensky I, Todorova A.		Yordanova I	Neurosci Lett	2011			10.1016/j.neulet.2011.03.008
31686106	Optimization of in silico tools for predicting genetic variants: individualizing for genes with molecular sub-regional stratification	Tang B, Li B, Gao LD, He N, Liu XR, Long YS, Zeng Y, Yi YH, Su T, Liao WP.		Tang B	Brief Bioinform	2020			10.1093/bib/bbz115
23182886	Oral mexiletine for lidocaine-responsive neonatal epilepsy	Nakazawa M, Okumura A, Niijima S, Yamashita S, Shimono K, Hirose S, Shimizu T.		Nakazawa M	Brain Dev	2013			10.1016/j.braindev.2012.10.011
21708262	Ototrauma induces sodium channel plasticity in auditory afferent neurons	Fryatt AG, Mulheran M, Egerton J, Gunthorpe MJ, Grubb BD.		Fryatt AG	Mol Cell Neurosci	2011	PMC3176910		10.1016/j.mcn.2011.06.005
30527252	Outcomes and comorbidities of SCN1A-related seizure disorders	de Lange IM, Gunning B, Sonsma ACM, van Gemert L, van Kempen M, Verbeek NE, Sinoo C, Nicolai J, Knoers NVAM, Koeleman BPC, Brilstra EH.		de Lange IM	Epilepsy Behav	2019			10.1016/j.yebeh.2018.09.041
15620849	Paediatrics: genetic insights and long-term follow-up	Forsyth R.		Forsyth R	Lancet Neurol	2005			10.1016/S1474-4422(04)00947-0
20813567	Panayiotopoulos syndrome: probable genetic origin, but not in SCN1A	Mart¨ªn Del Valle F, D¨ªaz Negrillo A, Ares Mateos G, Sanz Santaeufemia FJ, Del Rosal Rabes T, Gonz¨¢lez-Valc¨¢rcel S¨¢nchez-Puelles FJ.		Mart¨ªn Del Valle F	Eur J Paediatr Neurol	2011			10.1016/j.ejpn.2010.08.002
16541393	Parental mosaicism can cause recurrent transmission of SCN1A mutations associated with severe myoclonic epilepsy of infancy	Depienne C, Arzimanoglou A, Trouillard O, Fedirko E, Baulac S, Saint-Martin C, Ruberg M, Dravet C, Nabbout R, Baulac M, Gourfinkel-An I, LeGuern E.		Depienne C	Hum Mutat	2006			10.1002/humu.9419
27021235	Parental mosaicism in another case of Dravet syndrome caused by a novel SCN1A deletion: a case report	Sharkia R, Hengel H, Sch?ls L, Athamna M, Bauer P, Mahajnah M.		Sharkia R	J Med Case Rep	2016	PMC4810572		10.1186/s13256-016-0854-2
31077350	Parental mosaicism in epilepsies due to alleged de novo variants	M?ller RS, Liebmann N, Larsen LHG, Stiller M, Hentschel J, Kako N, Abdin D, Di Donato N, Pal DK, Zacher P, Syrbe S, Dahl HA, Lemke JR.		M?ller RS	Epilepsia	2019			10.1111/epi.15187
28982531	Parental Perception of Comorbidities in Children With Dravet Syndrome	Knupp KG, Scarbro S, Wilkening G, Juarez-Colunga E, Kempe A, Dempsey A.		Knupp KG	Pediatr Neurol	2017			10.1016/j.pediatrneurol.2017.06.008
19673951	Parental SCN1A mutation mosaicism in familial Dravet syndrome	Selmer KK, Eriksson AS, Brandal K, Egeland T, Tallaksen C, Undlien DE.		Selmer KK	Clin Genet	2009			10.1111/j.1399-0004.2009.01208.x
33109474	Parkinsonism in children: Clinical classification and etiological spectrum	Leuzzi V, Nardecchia F, Pons R, Galosi S.		Leuzzi V	Parkinsonism Relat Disord	2021			10.1016/j.parkreldis.2020.10.002
12907273	Paroxysmal movement disorders in severe myoclonic epilepsy in infancy	Ohtsuka Y, Ohmori I, Ogino T, Ouchida M, Shimizu K, Oka E.		Ohtsuka Y	Brain Dev	2003			10.1016/s0387-7604(03)00025-1
11756608	Partial and generalized epilepsy with febrile seizures plus and a novel SCN1A mutation	Abou-Khalil B, Ge Q, Desai R, Ryther R, Bazyk A, Bailey R, Haines JL, Sutcliffe JS, George AL Jr.		Abou-Khalil B	Neurology	2001			10.1212/wnl.57.12.2265
20550552	Partial epilepsy with antecedent febrile seizures and seizure aggravation by antiepileptic drugs: associated with loss of function of Na(v) 1.1	Liao WP, Shi YW, Long YS, Zeng Y, Li T, Yu MJ, Su T, Deng P, Lei ZG, Xu SJ, Deng WY, Liu XR, Sun WW, Yi YH, Xu ZC, Duan S.		Liao WP	Epilepsia	2010			10.1111/j.1528-1167.2010.02645.x
27113213	Pathogenic copy number variants and SCN1A mutations in patients with intellectual disability and childhood-onset epilepsy	Fry AE, Rees E, Thompson R, Mantripragada K, Blake P, Jones G, Morgan S, Jose S, Mugalaasi H, Archer H, McCann E, Clarke A, Taylor C, Davies S, Gibbon F, Te Water Naude J, Hartley L, Thomas G, White C, Natarajan J, Thomas RH, Drew C, Chung SK, Rees MI, Holmans P, Owen MJ, Kirov G, Pilz DT, Kerr MP.		Fry AE	BMC Med Genet	2016	PMC4845474		10.1186/s12881-016-0294-2
26900580	Pathogenic mechanism of recurrent mutations of SCN8A in epileptic encephalopathy	Wagnon JL, Barker BS, Hounshell JA, Haaxma CA, Shealy A, Moss T, Parikh S, Messer RD, Patel MK, Meisler MH.		Wagnon JL	Ann Clin Transl Neurol	2015	PMC4748308		10.1002/acn3.276
29408779	Pathogenic significance of SCN1A splicing variants causing Dravet syndrome: Improving diagnosis with targeted sequencing for variants by in silico analysis	Mahdieh N, Mikaeeli S, Badv RS, Shirazi AG, Maleki M, Rabbani B.		Mahdieh N	Clin Neurol Neurosurg	2018			10.1016/j.clineuro.2018.01.030
33399642	Pathogenic variant in the PCDH19 gene in a patient with epilepsy and cognitive disability	Venegas Silva V, Garc¨ªa Venegas E, Repetto Lisboa MG, Barroso Ramos E, Lapunzina Badia P.		Venegas Silva V	Rev Chil Pediatr	2020			10.32641/rchped.vi91i5.1490
33287870	Pathogenic variants identified by whole-exome sequencing in 43 patients with epilepsy	Zhang L, Gao J, Liu H, Tian Y, Zhang X, Lei W, Li Y, Guo Y, Yu H, Yuan E, Liang L, Cui S, Zhang X.		Zhang L	Hum Genomics	2020	PMC7720389		10.1186/s40246-020-00294-0
17507202	Patients with a sodium channel alpha 1 gene mutation show wide phenotypic variation	Osaka H, Ogiwara I, Mazaki E, Okamura N, Yamashita S, Iai M, Yamada M, Kurosawa K, Iwamoto H, Yasui-Furukori N, Kaneko S, Fujiwara T, Inoue Y, Yamakawa K.		Osaka H	Epilepsy Res	2007			10.1016/j.eplepsyres.2007.03.018
27389706	Patients with dravet syndrome in the era of stiripentol: A French cohort cross-sectional study	De Liso P, Chemaly N, Laschet J, Barnerias C, Hully M, Leunen D, Desguerre I, Chiron C, Dulac O, Nabbout R.		De Liso P	Epilepsy Res	2016			10.1016/j.eplepsyres.2016.05.012
22050978	PCDH19 mutation in Japanese females with epilepsy	Higurashi N, Shi X, Yasumoto S, Oguni H, Sakauchi M, Itomi K, Miyamoto A, Shiraishi H, Kato T, Makita Y, Hirose S.		Higurashi N	Epilepsy Res	2012			10.1016/j.eplepsyres.2011.10.014
27371789	PCDH19-related epilepsy and Dravet Syndrome: Face-off between two early-onset epilepsies with fever sensitivity	Trivisano M, Pietrafusa N, Ciommo Vd, Cappelletti S, Palma Ld, Terracciano A, Bertini E, Vigevano F, Specchio N.		Trivisano M	Epilepsy Res	2016			10.1016/j.eplepsyres.2016.05.015
28455388	PCDH19-related epilepsy: a rare but recognisable clinical syndrome in females	Lyons S, Marnane M, Reavey E, Williams N, Costello D.		Lyons S	Pract Neurol	2017			10.1136/practneurol-2016-001521
23712037	PCDH19-related female-limited epilepsy: further details regarding early clinical features and therapeutic efficacy	Higurashi N, Nakamura M, Sugai M, Ohfu M, Sakauchi M, Sugawara Y, Nakamura K, Kato M, Usui D, Mogami Y, Fujiwara Y, Ito T, Ikeda H, Imai K, Takahashi Y, Nukui M, Inoue T, Okazaki S, Kirino T, Tomonoh Y, Inoue T, Takano K, Shimakawa S, Hirose S.		Higurashi N	Epilepsy Res	2013			10.1016/j.eplepsyres.2013.04.005
22267240	PCDH19-related infantile epileptic encephalopathy: an unusual X-linked inheritance disorder	Depienne C, LeGuern E.		Depienne C	Hum Mutat	2012			10.1002/humu.22029
26161490	Pediatric seizures and vaccines	Kerstenetzky L, Gidal B.		Kerstenetzky L	J Am Pharm Assoc (2003)	2015			10.1331/JAPhA.2015.15522
34335252	Perampanel Reduces Hyperthermia-Induced Seizures in Dravet Syndrome Mouse Model	Ho SY, Lin L, Chen IC, Tsai CW, Chang FC, Liou HH.		Ho SY	Front Pharmacol	2021	PMC8317459		10.3389/fphar.2021.682767
23597049	Peripheral nerve injury is accompanied by chronic transcriptome-wide changes in the mouse prefrontal cortex	Alvarado S, Tajerian M, Millecamps M, Suderman M, Stone LS, Szyf M.		Alvarado S	Mol Pain	2013	PMC3640958		10.1186/1744-8069-9-21
25338670	Personalized medicine approaches in epilepsy	Walker LE, Mirza N, Yip VLM, Marson AG, Pirmohamed M.		Walker LE	J Intern Med	2015			10.1111/joim.12322
18093146	Pertussis vaccination and epilepsy--an erratic history, new research and the mismatch between science and social policy	Shorvon S, Berg A.		Shorvon S	Epilepsia	2008			10.1111/j.1528-1167.2007.01478.x
22884613	PGD for germline mosaicism	Altarescu G, Beeri R, Eldar-Geva T, Varshaver I, Margalioth EJ, Levy-Lahad E, Renbaum P.		Altarescu G	Reprod Biomed Online	2012			10.1016/j.rbmo.2012.07.003
21747585	Pharmacogenomic association study on the role of drug metabolizing, drug transporters and drug target gene polymorphisms in drug-resistant epilepsy in a north Indian population	Kumari R, Lakhan R, Garg RK, Kalita J, Misra UK, Mittal B.		Kumari R	Indian J Hum Genet	2011	PMC3125053		10.4103/0971-6866.80357
31686510	Pharmacokinetics of Phytocannabinoid Acids and Anticonvulsant Effect of Cannabidiolic Acid in a Mouse Model of Dravet Syndrome	Anderson LL, Low IK, Banister SD, McGregor IS, Arnold JC.		Anderson LL	J Nat Prod	2019			10.1021/acs.jnatprod.9b00600
28428755	Pharmacological Analysis of the Anti-epileptic Mechanisms of Fenfluramine in scn1a Mutant Zebrafish	Sourbron J, Smolders I, de Witte P, Lagae L.		Sourbron J	Front Pharmacol	2017	PMC5382218		10.3389/fphar.2017.00191
25965391	Pharmacological characterization of an antisense knockdown zebrafish model of Dravet syndrome: inhibition of epileptic seizures by the serotonin agonist fenfluramine	Zhang Y, Kecsk¨¦s A, Copmans D, Langlois M, Crawford AD, Ceulemans B, Lagae L, de Witte PA, Esguerra CV.		Zhang Y	PLoS One	2015	PMC4428833		10.1371/journal.pone.0125898
28607094	Pharmacology of the Na(v)1.1 domain IV voltage sensor reveals coupling between inactivation gating processes	Osteen JD, Sampson K, Iyer V, Julius D, Bosmans F.		Osteen JD	Proc Natl Acad Sci U S A	2017	PMC5495237		10.1073/pnas.1621263114
26966048	Pharmacotherapy for Dravet Syndrome	Wallace A, Wirrell E, Kenney-Jung DL.		Wallace A	Paediatr Drugs	2016			10.1007/s40272-016-0171-7
19398712	Phenomenology of prolonged febrile seizures: results of the FEBSTAT study	Herrera EA, Alvarez SY, Cobox O, Villeda T.		Herrera EA	Neurology	2009			10.1212/01.wnl.0000346464.71661.72
16884893	Phenotypes and genotypes in epilepsy with febrile seizures plus	Ito M, Yamakawa K, Sugawara T, Hirose S, Fukuma G, Kaneko S.		Ito M	Epilepsy Res	2006			10.1016/j.eplepsyres.2005.11.028
34083748	Phenotypic analysis of catastrophic childhood epilepsy genes	Griffin A, Carpenter C, Liu J, Paterno R, Grone B, Hamling K, Moog M, Dinday MT, Figueroa F, Anvar M, Ononuju C, Qu T, Baraban SC.		Griffin A	Commun Biol	2021	PMC8175701		10.1038/s42003-021-02221-y
33820833	Phenotypic spectrum and genomics of undiagnosed arthrogryposis multiplex congenita	Laquerriere A, Jaber D, Abiusi E, Maluenda J, Mejlachowicz D, Vivanti A, Dieterich K, Stoeva R, Quevarec L, Nolent F, Biancalana V, Latour P, Sternberg D, Capri Y, Verloes A, Bessieres B, Loeuillet L, Attie-Bitach T, Martinovic J, Blesson S, Petit F, Beneteau C, Whalen S, Marguet F, Bouligand J, H¨¦ron D, Viot G, Amiel J, Amram D, Bellesme C, Bucourt M, Faivre L, Jouk PS, Khung S, Sigaudy S, Dele…		Laquerriere A	J Med Genet	2021			10.1136/jmedgenet-2020-107595
20728059	Phenytoin-induced visual disturbances mimicking Delirium Tremens in a child	Mar¨ªn LL, Garc¨ªa-Pe?as JJ, Herguedas JL, Guti¨¦rrez-Solana LG, Ruiz-Falc¨® M, Rodriguez AD, Extremera VC.		Mar¨ªn LL	Eur J Paediatr Neurol	2010			10.1016/j.ejpn.2010.05.008
28042998	Photosensitivity in Dravet syndrome is under-recognized and related to prognosis	Verbeek N, Kasteleijn-Nolst Trenit¨¦ D, Wassenaar M, van Campen J, Sonsma A, Gunning WB, de Weerd A, Knoers N, Spetgens W, Gutter T, Leijten F, Brilstra E.		Verbeek N	Clin Neurophysiol	2017			10.1016/j.clinph.2016.11.021
19586930	Physicochemical property changes of amino acid residues that accompany missense mutations in SCN1A affect epilepsy phenotype severity	Kanai K, Yoshida S, Hirose S, Oguni H, Kuwabara S, Sawai S, Hiraga A, Fukuma G, Iwasa H, Kojima T, Kaneko S.		Kanai K	J Med Genet	2009			10.1136/jmg.2008.060897
27465585	Pitfalls in genetic testing: the story of missed SCN1A mutations	Dj¨¦mi¨¦ T, Weckhuysen S, von Spiczak S, Carvill GL, Jaehn J, Anttonen AK, Brilstra E, Caglayan HS, de Kovel CG, Depienne C, Gaily E, Gennaro E, Giraldez BG, Gormley P, Guerrero-L¨®pez R, Guerrini R, H?m?l?inen E, Hartmann C, Hernandez-Hernandez L, Hjalgrim H, Koeleman BP, Leguern E, Lehesjoki AE, Lemke JR, Leu C, Marini C, McMahon JM, Mei D, M?ller RS, Muhle H, Myers CT, Nava C, Serratosa JM, Si…		Dj¨¦mi¨¦ T	Mol Genet Genomic Med	2016	PMC4947864		10.1002/mgg3.217
32615329	Poison exons in neurodevelopment and disease	Carvill GL, Mefford HC.		Carvill GL	Curr Opin Genet Dev	2020	PMC8042789	NIHMS1608228	10.1016/j.gde.2020.05.030
17111377	Polarized distribution of ion channels within microdomains of the axon initial segment	Van Wart A, Trimmer JS, Matthews G.		Van Wart A	J Comp Neurol	2007			10.1002/cne.21173
26555147	Polymorphic Variants of SCN1A and EPHX1 Influence Plasma Carbamazepine Concentration, Metabolism and Pharmacoresistance in a Population of Kosovar Albanian Epileptic Patients	Daci A, Beretta G, Vllasaliu D, Shala A, Govori V, Norata GD, Krasniqi S.		Daci A	PLoS One	2015	PMC4640545		10.1371/journal.pone.0142408
21713554	Polymorphisms of the SCN1A gene in children and adolescents with primary headache and idiopathic or cryptogenic epilepsy: is there a linkage?	Toldo I, Bruson A, Casarin A, Salviati L, Boniver C, Sartori S, Montagna P, Battistella PA, Clementi M.		Toldo I	J Headache Pain	2011	PMC3139068		10.1007/s10194-011-0359-8
32457604	Possible Genetic Determinants of Response to Phenytoin in a Group of Colombian Patients With Epilepsy	Calderon-Ospina CA, Galvez JM, L¨®pez-Cabra C, Morales N, Restrepo CM, Rodr¨ªguez J, Aristiz¨¢bal-Guti¨¦rrez FA, Velez-van-Meerbeke A, Laissue P, Fonseca-Mendoza DJ.		Calderon-Ospina CA	Front Pharmacol	2020	PMC7221122		10.3389/fphar.2020.00555
25312340	Postzygotic single-nucleotide mosaicisms in whole-genome sequences of clinically unremarkable individuals	Huang AY, Xu X, Ye AY, Wu Q, Yan L, Zhao B, Yang X, He Y, Wang S, Zhang Z, Gu B, Zhao HQ, Wang M, Gao H, Gao G, Zhang Z, Yang X, Wu X, Zhang Y, Wei L.		Huang AY	Cell Res	2014	PMC4220156		10.1038/cr.2014.131
31045243	Potentiating ¦Á(2) subunit containing perisomatic GABA(A) receptors protects against seizures in a mouse model of Dravet syndrome	Nomura T, Hawkins NA, Kearney JA, George AL Jr, Contractor A.		Nomura T	J Physiol	2019	PMC7087452	NIHMS1572910	10.1113/JP277651
31980364	Precision medicine in sodium channelopathies - Moving beyond seizure control towards disease modification	Brunklaus A.		Brunklaus A	Eur J Paediatr Neurol	2020			10.1016/j.ejpn.2020.01.008
29915537	Preclinical Animal Models for Dravet Syndrome: Seizure Phenotypes, Comorbidities and Drug Screening	Griffin A, Hamling KR, Hong S, Anvar M, Lee LP, Baraban SC.		Griffin A	Front Pharmacol	2018	PMC5994396		10.3389/fphar.2018.00573
22926190	Preferential inactivation of Scn1a in parvalbumin interneurons increases seizure susceptibility	Dutton SB, Makinson CD, Papale LA, Shankar A, Balakrishnan B, Nakazawa K, Escayg A.		Dutton SB	Neurobiol Dis	2013	PMC3740063	NIHMS413039	10.1016/j.nbd.2012.08.012
26995069	Prevalence and Characteristics of Vaccination Triggered Seizures in Dravet Syndrome in Hong Kong: A Retrospective Study	Wong PT, Wong VC.		Wong PT	Pediatr Neurol	2016			10.1016/j.pediatrneurol.2016.01.011
29144225	Prevalence of Genetic Disorders and GLUT1 Deficiency in a Ketogenic Diet Clinic	Hewson S, Brunga L, Ojeda MF, Imhof E, Patel J, Zak M, Donner EJ, Kobayashi J, Salomons GS, Mercimek-Andrews S.		Hewson S	Can J Neurol Sci	2018			10.1017/cjn.2017.246
23195492	Prevalence of SCN1A mutations in children with suspected Dravet syndrome and intractable childhood epilepsy	Wang JW, Shi XY, Kurahashi H, Hwang SK, Ishii A, Higurashi N, Kaneko S, Hirose S; Epilepsy Genetic Study Group Japan.		Wang JW	Epilepsy Res	2012			10.1016/j.eplepsyres.2012.06.006
23762420	Prevalence of SCN1A-related dravet syndrome among children reported with seizures following vaccination: a population-based ten-year cohort study	Verbeek NE, van der Maas NA, Jansen FE, van Kempen MJ, Lindhout D, Brilstra EH.		Verbeek NE	PLoS One	2013	PMC3675088		10.1371/journal.pone.0065758
22719002	Prognostic, clinical and demographic features in SCN1A mutation-positive Dravet syndrome	Brunklaus A, Ellis R, Reavey E, Forbes GH, Zuberi SM.		Brunklaus A	Brain	2012			10.1093/brain/aws151
19201561	Progress in searching for the febrile seizure susceptibility genes	Nakayama J.		Nakayama J	Brain Dev	2009			10.1016/j.braindev.2008.11.014
22409937	Progressive gait deterioration in adolescents with Dravet syndrome	Rodda JM, Scheffer IE, McMahon JM, Berkovic SF, Graham HK.		Rodda JM	Arch Neurol	2012			10.1001/archneurol.2011.3275
19764027	Progressive neurocognitive decline in two children with Dravet syndrome, de novo SCN1A truncations and different epileptic phenotypes	Riva D, Vago C, Pantaleoni C, Bulgheroni S, Mantegazza M, Franceschetti S.		Riva D	Am J Med Genet A	2009			10.1002/ajmg.a.33029
24850863	Prokaryotic NavMs channel as a structural and functional model for eukaryotic sodium channel antagonism	Bagn¨¦ris C, DeCaen PG, Naylor CE, Pryde DC, Nobeli I, Clapham DE, Wallace BA.		Bagn¨¦ris C	Proc Natl Acad Sci U S A	2014	PMC4060673		10.1073/pnas.1406855111
31041505	Prolonged post-differentiation culture influences the expression and biophysics of Na(+) and Ca(2+) channels in induced pluripotent stem cell-derived ventricular-like cardiomyocytes	Ross GR, Rizvi F, Emelyanova L, Tajik AJ, Jahangir A.		Ross GR	Cell Tissue Res	2019			10.1007/s00441-019-03030-w
21833183	Propranolol blocks cardiac and neuronal voltage-gated sodium channels	Wang DW, Mistry AM, Kahlig KM, Kearney JA, Xiang J, George AL Jr.		Wang DW	Front Pharmacol	2010	PMC3153018		10.3389/fphar.2010.00144
29990707	Prospective study of the efficacy of a ketogenic diet in 20 patients with Dravet syndrome	Yan N, Xin-Hua W, Lin-Mei Z, Yi-Ming C, Wen-Hui L, Yuan-Feng Z, Shui-Zhen Z.		Yan N	Seizure	2018			10.1016/j.seizure.2018.06.023
21801172	Protective effect of the ketogenic diet in Scn1a mutant mice	Dutton SB, Sawyer NT, Kalume F, Jumbo-Lucioni P, Borges K, Catterall WA, Escayg A.		Dutton SB	Epilepsia	2011	PMC3204183	NIHMS308877	10.1111/j.1528-1167.2011.03211.x
34713469	Protective effects of medium chain triglyceride diet in a mouse model of Dravet syndrome	Jancovski N, Baldwin T, Orford M, Li M, Jones GD, Burbano LE, Rutherford T, Reid C, Heales S, Eaton S, Petrou S.		Jancovski N	Epilepsia	2021			10.1111/epi.17101
34144125	Proteomic signature of the Dravet syndrome in the genetic Scn1a-A1783V mouse model	Miljanovic N, Hauck SM, van Dijk RM, Di Liberto V, Rezaei A, Potschka H.		Miljanovic N	Neurobiol Dis	2021			10.1016/j.nbd.2021.105423
21444909	Protocadherin 19 mutations in girls with infantile-onset epilepsy	Nabbout R, Depienne C, Chiron C, Dulac O.		Nabbout R	Neurology	2011			10.1212/WNL.0b013e31820a9642
29046322	Pumilio2-deficient mice show a predisposition for epilepsy	Follwaczny P, Schieweck R, Riedemann T, Demleitner A, Straub T, Klemm AH, Bilban M, Sutor B, Popper B, Kiebler MA.		Follwaczny P	Dis Model Mech	2017	PMC5719250		10.1242/dmm.029678
22150645	Pure haploinsufficiency for Dravet syndrome Na(V)1.1 (SCN1A) sodium channel truncating mutations	Bechi G, Scalmani P, Schiavon E, Rusconi R, Franceschetti S, Mantegazza M.		Bechi G	Epilepsia	2012			10.1111/j.1528-1167.2011.03346.x
24417577	Purinergic control of hippocampal circuit hyperexcitability in Dravet syndrome	Gu F, Hazra A, Aulakh A, ?iburkus J.		Gu F	Epilepsia	2014			10.1111/epi.12487
20487671	Pyrethroid pediculicide resistance of head lice in Canada evaluated by serial invasive signal amplification reaction	Marcoux D, Palma KG, Kaul N, Hodgdon H, Van Geest A, Previte DJ, Abou-Elghar GE, Yoon KS, Clark JM.		Marcoux D	J Cutan Med Surg	2010			10.2310/7750.2010.09032
23065439	QT and P wave dispersion and heart rate variability in patients with Dravet syndrome	Ergul Y, Ekici B, Tatli B, Nisli K, Ozmen M.		Ergul Y	Acta Neurol Belg	2013			10.1007/s13760-012-0140-z
26369628	Quinidine in the treatment of KCNT1-positive epilepsies	Mikati MA, Jiang YH, Carboni M, Shashi V, Petrovski S, Spillmann R, Milligan CJ, Li M, Grefe A, McConkie A, Berkovic S, Scheffer I, Mullen S, Bonner M, Petrou S, Goldstein D.		Mikati MA	Ann Neurol	2015	PMC4811613	NIHMS770974	10.1002/ana.24520
30353809	Randomized Controlled Trial of Melatonin for Sleep Disturbance in Dravet Syndrome: The DREAMS Study	Myers KA, Davey MJ, Ching M, Ellis C, Grinton BE, Roten A, Lightfoot PA, Scheffer IE.		Myers KA	J Clin Sleep Med	2018	PMC6175806		10.5664/jcsm.7376
25800813	Ranking adverse drug reactions with crowdsourcing	Gottlieb A, Hoehndorf R, Dumontier M, Altman RB.		Gottlieb A	J Med Internet Res	2015	PMC4387295		10.2196/jmir.3962
20735403	Ranolazine selectively blocks persistent current evoked by epilepsy-associated Na¦Í1.1 mutations	Kahlig KM, Lepist I, Leung K, Rajamani S, George AL.		Kahlig KM	Br J Pharmacol	2010	PMC3000664		10.1111/j.1476-5381.2010.00976.x
27955713	Rare and common epilepsies converge on a shared gene regulatory network providing opportunities for novel antiepileptic drug discovery	Delahaye-Duriez A, Srivastava P, Shkura K, Langley SR, Laaniste L, Moreno-Moral A, Danis B, Mazzuferi M, Foerch P, Gazina EV, Richards K, Petrou S, Kaminski RM, Petretto E, Johnson MR.		Delahaye-Duriez A	Genome Biol	2016	PMC5154105		10.1186/s13059-016-1097-7
28686619	Rare variants of small effect size in neuronal excitability genes influence clinical outcome in Japanese cases of SCN1A truncation-positive Dravet syndrome	Hammer MF, Ishii A, Johnstone L, Tchourbanov A, Lau B, Sprissler R, Hallmark B, Zhang M, Zhou J, Watkins J, Hirose S.		Hammer MF	PLoS One	2017	PMC5501540		10.1371/journal.pone.0180485
18031552	Rasmussen encephalitis associated with SCN 1 A mutation	Ohmori I, Ouchida M, Kobayashi K, Jitsumori Y, Inoue T, Shimizu K, Matsui H, Ohtsuka Y, Maegaki Y.		Ohmori I	Epilepsia	2008			10.1111/j.1528-1167.2007.01411.x
28199897	Real-world utility of whole exome sequencing with targeted gene analysis for focal epilepsy	Perucca P, Scheffer IE, Harvey AS, James PA, Lunke S, Thorne N, Gaff C, Regan BM, Damiano JA, Hildebrand MS, Berkovic SF, O'Brien TJ, Kwan P.		Perucca P	Epilepsy Res	2017			10.1016/j.eplepsyres.2017.02.001
31814998	Re-annotation of 191 developmental and epileptic encephalopathy-associated genes unmasks de novo variants in SCN1A	Steward CA, Roovers J, Suner MM, Gonzalez JM, Uszczynska-Ratajczak B, Pervouchine D, Fitzgerald S, Viola M, Stamberger H, Hamdan FF, Ceulemans B, Leroy P, Nava C, Lepine A, Tapanari E, Keiller D, Abbs S, Sanchis-Juan A, Grozeva D, Rogers AS, Diekhans M, Guig¨® R, Petryszak R, Minassian BA, Cavalleri G, Vitsios D, Petrovski S, Harrow J, Flicek P, Lucy Raymond F, Lench NJ, Jonghe P, Mudge JM, Weckh…		Steward CA	NPJ Genom Med	2019	PMC6889285		10.1038/s41525-019-0106-7
31549357	Recent Advances in the Drug Treatment of Dravet Syndrome	Wirrell EC, Nabbout R.		Wirrell EC	CNS Drugs	2019			10.1007/s40263-019-00666-8
17508172	Recent advances in the pharmacogenomics of pain and headache	Montagna P.		Montagna P	Neurol Sci	2007			10.1007/s10072-007-0778-0
31889633	Recent advances in treatment of epilepsy-related sodium channelopathies	Musto E, Gardella E, M?ller RS.		Musto E	Eur J Paediatr Neurol	2020			10.1016/j.ejpn.2019.12.009
17141570	Recent advances in understanding migraine mechanisms, molecules and therapeutics	Goadsby PJ.		Goadsby PJ	Trends Mol Med	2007			10.1016/j.molmed.2006.11.005
16458823	Recurrent de novo mutations of SCN1A in severe myoclonic epilepsy of infancy	Kearney JA, Wiste AK, Stephani U, Trudeau MM, Siegel A, RamachandranNair R, Elterman RD, Muhle H, Reinsdorf J, Shields WD, Meisler MH, Escayg A.		Kearney JA	Pediatr Neurol	2006			10.1016/j.pediatrneurol.2005.07.009
31758544	Reduced cannabinoid 2 receptor activity increases susceptibility to induced seizures in mice	Shapiro L, Wong JC, Escayg A.		Shapiro L	Epilepsia	2019	PMC6911915	NIHMS1056271	10.1111/epi.16388
24747835	Reduced dendritic arborization and hyperexcitability of pyramidal neurons in a Scn1b-based model of Dravet syndrome	Reid CA, Leaw B, Richards KL, Richardson R, Wimmer V, Yu C, Hill-Yardin EL, Lerche H, Scheffer IE, Berkovic SF, Petrou S.		Reid CA	Brain	2014			10.1093/brain/awu077
21190943	Reduced sodium channel Na(v)1.1 levels in BACE1-null mice	Kim DY, Gersbacher MT, Inquimbert P, Kovacs DM.		Kim DY	J Biol Chem	2011	PMC3048697		10.1074/jbc.M110.134692
16921370	Reduced sodium current in GABAergic interneurons in a mouse model of severe myoclonic epilepsy in infancy	Yu FH, Mantegazza M, Westenbroek RE, Robbins CA, Kalume F, Burton KA, Spain WJ, McKnight GS, Scheuer T, Catterall WA.		Yu FH	Nat Neurosci	2006			10.1038/nn1754
17928448	Reduced sodium current in Purkinje neurons from Nav1.1 mutant mice: implications for ataxia in severe myoclonic epilepsy in infancy	Kalume F, Yu FH, Westenbroek RE, Scheuer T, Catterall WA.		Kalume F	J Neurosci	2007	PMC6672849		10.1523/JNEUROSCI.2162-07.2007
26889571	Reflex Seizures Triggered by Diaper Change in Dravet Syndrome	Subki AH, Alasmari AS, Jan FM, Moria FA, Jan MM.		Subki AH	Can J Neurol Sci	2016			10.1017/cjn.2015.394
21692795	Refractory neonatal epilepsy with a de novo duplication of chromosome 2q24.2q24.3	Okumura A, Yamamoto T, Shimojima K, Honda Y, Abe S, Ikeno M, Shimizu T.		Okumura A	Epilepsia	2011			10.1111/j.1528-1167.2011.03139.x
18275929	Refractory, life-threatening status epilepticus in a 3-year-old girl	Striano P, Striano S, Minetti C, Zara F.		Striano P	Lancet Neurol	2008			10.1016/S1474-4422(08)70043-7
19228957	Regulation of persistent Na current by interactions between beta subunits of voltage-gated Na channels	Aman TK, Grieco-Calub TM, Chen C, Rusconi R, Slat EA, Isom LL, Raman IM.		Aman TK	J Neurosci	2009	PMC2667244	NIHMS96957	10.1523/JNEUROSCI.4531-08.2009
33732797	Relative Quantification of Na(V)1.1 Protein in Mouse Brains Using a Meso Scale Discovery-Electrochemiluminescence (MSD-ECL) Method	Han Z, Christiansen A, Meena, Liau G.		Han Z	Bio Protoc	2021	PMC7952935		10.21769/BioProtoc.3910
34612084	Relevance of NR1I2 variants on carbamazepine therapy in Mexican Mestizos with epilepsy at a tertiary-care hospital	Fricke-Galindo I, Jung-Cook H, Mart¨ªnez-Ju¨¢rez IE, Monroy-Jaramillo N, Ortega-V¨¢zquez A, Rojas-Tom¨¦ IS, Dorado P, Pe?as-Lled¨® E, Llerena A, L¨®pez-L¨®pez M.		Fricke-Galindo I	Pharmacogenomics	2021			10.2217/pgs-2021-0081
21762453	Replication of association between a SCN1A splice variant and febrile seizures	Le Gal F, Salzmann A, Crespel A, Malafosse A.		Le Gal F	Epilepsia	2011			10.1111/j.1528-1167.2011.03164.x
25576396	Rescuable folding defective NaV1.1 (SCN1A) mutants in epilepsy: properties, occurrence, and novel rescuing strategy with peptides targeted to the endoplasmic reticulum	Bechi G, Rusconi R, Cest¨¨le S, Striano P, Franceschetti S, Mantegazza M.		Bechi G	Neurobiol Dis	2015			10.1016/j.nbd.2014.12.028
11729869	Respiratory rhythm generation: preB?tzinger neuron discharge patterns and persistent sodium current	McCrimmon DR, Monnier A, Ptak K, Zummo G, Zhang Z, Alheid GF.		McCrimmon DR	Adv Exp Med Biol	2001			10.1007/978-1-4615-1375-9_23
34556045	Response to Sodium Channel blocking Antiseizure medications and coding polymorphisms of Sodium Channel genes in Taiwanese epilepsy patients	Lin CH, Ho CJ, Lu YT, Tsai MH.		Lin CH	BMC Neurol	2021	PMC8459515		10.1186/s12883-021-02395-2
32659653	Response to: Deng L, Ma A, Wood N, Ardern-Holmes S. Vaccination management in an asymptomatic child with a novel SCN1A variant and family history of status epilepticus following vaccination: A case report on a potential new direction in personalised medicine. Seizure. 2020;78:49-52	Shafrir Y.		Shafrir Y	Seizure	2020			10.1016/j.seizure.2020.07.004
21480880	Retrospective multiinstitutional study of the prevalence of early death in Dravet syndrome	Sakauchi M, Oguni H, Kato I, Osawa M, Hirose S, Kaneko S, Takahashi Y, Takayama R, Fujiwara T.		Sakauchi M	Epilepsia	2011			10.1111/j.1528-1167.2011.03053.x
30529264	RNA-seq Analysis of the SCN1A-KO Model based on CRISPR/Cas9 Genome Editing Technology	Shi X, He W, Guo S, Zhang B, Ren S, Liu K, Sun T, Cui J.		Shi X	Neuroscience	2019			10.1016/j.neuroscience.2018.11.052
31870697	Rodent genetic models of neurodevelopmental disorders and epilepsy	Gonzalez-Sulser A.		Gonzalez-Sulser A	Eur J Paediatr Neurol	2020			10.1016/j.ejpn.2019.12.012
17181426	Role of genetics in the diagnosis and treatment of epilepsy	Ferraro TN, Dlugos DJ, Buono RJ.		Ferraro TN	Expert Rev Neurother	2006			10.1586/14737175.6.12.1789
23570977	Role of late sodium current as a potential arrhythmogenic mechanism in the progression of pressure-induced heart disease	Toischer K, Hartmann N, Wagner S, Fischer TH, Herting J, Danner BC, Sag CM, Hund TJ, Mohler PJ, Belardinelli L, Hasenfuss G, Maier LS, Sossalla S.		Toischer K	J Mol Cell Cardiol	2013	PMC3720777	NIHMS466908	10.1016/j.yjmcc.2013.03.021
24704313	Role of the hippocampus in Nav1.6 (Scn8a) mediated seizure resistance	Makinson CD, Tanaka BS, Lamar T, Goldin AL, Escayg A.		Makinson CD	Neurobiol Dis	2014	PMC4077284	NIHMS593284	10.1016/j.nbd.2014.03.014
23895530	Role of the sodium channel SCN9A in genetic epilepsy with febrile seizures plus and Dravet syndrome	Mulley JC, Hodgson B, McMahon JM, Iona X, Bellows S, Mullen SA, Farrell K, Mackay M, Sadleir L, Bleasel A, Gill D, Webster R, Wirrell EC, Harbord M, Sisodiya S, Andermann E, Kivity S, Berkovic SF, Scheffer IE, Dibbens LM.		Mulley JC	Epilepsia	2013			10.1111/epi.12323
25668517	RORA gene rs12912233 and rs880626 polymorphisms and their interaction with SCN1A rs3812718 in the risk of epilepsy: a case-control study in Malaysia	Haerian BS, Sha'ari HM, Tan HJ, Fong CY, Wong SW, Ong LC, Raymond AA, Tan CT, Mohamed Z.		Haerian BS	Genomics	2015			10.1016/j.ygeno.2015.02.001
31575436	Rufinamide efficacy and association with phenotype and genotype in children with intractable epilepsy: A retrospective single center study	Oesch G, Bozarth XL.		Oesch G	Epilepsy Res	2020			10.1016/j.eplepsyres.2019.106211
33645379	Safety considerations selecting antiseizure medications for the treatment of individuals with Dravet syndrome	Nabbout R, Chemaly N, Chiron C, Kuchenbuch M.		Nabbout R	Expert Opin Drug Saf	2021			10.1080/14740338.2021.1890025
16505326	SCN1A (2528delG) novel truncating mutation with benign outcome of severe myoclonic epilepsy of infancy	Buoni S, Orrico A, Galli L, Zannolli R, Burroni L, Hayek J, Fois A, Sorrentino V.		Buoni S	Neurology	2006			10.1212/01.WNL.0000198504.41315.B1
22534457	SCN1A affects brain structure and the neural activity of the aging brain	Meier S, Demirakca T, Brusniak W, Wolf I, Liebsch K, Tunc-Skarka N, Nieratschker V, Witt SH, Matth?us F, Ende G, Flor H, Rietschel M, Diener C, Schulze TG.		Meier S	Biol Psychiatry	2012			10.1016/j.biopsych.2012.03.017
33045260	Scn1a and Cacna1a mutations mutually alter their original phenotypes in rats	Ohmori I, Kobayashi K, Ouchida M.		Ohmori I	Neurochem Int	2020			10.1016/j.neuint.2020.104859
25170313	SCN1A and Febrile Seizures in Mesial Temporal Epilepsy: An Early Signal to Guide Prognosis and Treatment?	Rossi MA.		Rossi MA	Epilepsy Curr	2014	PMC4120385		10.5698/1535-7597-14.4.189
26877851	SCN1A and SCN1B gene polymorphisms and their association with plasma concentrations of carbamazepine and carbamazepine 10, 11 epoxide in Iranian epileptic patients	Namazi S, Azarpira N, Javidnia K, Emami M, Rahjoo R, Berahmand R, Borhani-Haghighi A.		Namazi S	Iran J Basic Med Sci	2015	PMC4744361
30693367	SCN1A and SCN2A polymorphisms are associated with response to valproic acid in Chinese epilepsy patients	Shi L, Zhu M, Li H, Wen Z, Chen X, Luo J, Lin C, Zhang Z.		Shi L	Eur J Clin Pharmacol	2019			10.1007/s00228-019-02633-0
28192756	SCN1A clinical spectrum includes the self-limited focal epilepsies of childhood	Kivity S, Oliver KL, Afawi Z, Damiano JA, Arsov T, Bahlo M, Berkovic SF.		Kivity S	Epilepsy Res	2017			10.1016/j.eplepsyres.2017.01.012
19400878	SCN1A duplications and deletions detected in Dravet syndrome: implications for molecular diagnosis	Marini C, Scheffer IE, Nabbout R, Mei D, Cox K, Dibbens LM, McMahon JM, Iona X, Carpintero RS, Elia M, Cilio MR, Specchio N, Giordano L, Striano P, Gennaro E, Cross JH, Kivity S, Neufeld MY, Afawi Z, Andermann E, Keene D, Dulac O, Zara F, Berkovic SF, Guerrini R, Mulley JC.		Marini C	Epilepsia	2009			10.1111/j.1528-1167.2009.02013.x
26694226	Scn1a dysfunction alters behavior but not the effect of stress on seizure response	Sawyer NT, Helvig AW, Makinson CD, Decker MJ, Neigh GN, Escayg A.		Sawyer NT	Genes Brain Behav	2016			10.1111/gbb.12281
30779207	SCN1A gain of function in early infantile encephalopathy	Berecki G, Bryson A, Terhag J, Maljevic S, Gazina EV, Hill SL, Petrou S.		Berecki G	Ann Neurol	2019			10.1002/ana.25438
28079314	SCN1A Gene Mutation and Adaptive Functioning in 18 Vietnamese Children with Dravet Syndrome	Do TT, Vu DM, Huynh TT, Le TK, Sohn EH, Le TM, Ha HH, Bui CB.		Do TT	J Clin Neurol	2017	PMC5242153		10.3988/jcn.2017.13.1.62
27236449	SCN1A gene sequencing in 46 Turkish epilepsy patients disclosed 12 novel mutations	Usluer S, Salar S, Arslan M, Yi? U, Kara B, Tekt¨¹rk P, Baykan B, Meral C, T¨¹rkdo?an D, Bebek N, Yal??n ?apan ?, G¨¹ndo?du Eken A, ?a?layan SH.		Usluer S	Seizure	2016			10.1016/j.seizure.2016.05.008
23653348	SCN1A Genetic Test for Dravet Syndrome (Severe Myoclonic Epilepsy of Infancy and its Clinical Subtypes) for use in the Diagnosis, Prognosis, Treatment and Management of Dravet Syndrome	Stenhouse SA, Ellis R, Zuberi S.		Stenhouse SA	PLoS Curr	2013	PMC3644298		10.1371/currents.eogt.c553b83d745dd79bfb61eaf35e522b0b
15346159	SCN1A in SMEI, ICEGTC, and GEFS+: Alphabet Soup or Emerging Genotypic-Phenotypic Clarity?	Stafstrom CE.		Stafstrom CE	Epilepsy Curr	2003	PMC321216		10.1046/j.1535-7597.2003.03602.x
33391151	SCN1A IVS5N+5 G>A Polymorphism and Risk of Febrile Seizure and Epilepsy: A Systematic Review and Meta-Analysis	Hao J, Liu H, Ma J, Liu G, Dong G, Liu P, Xiao F.		Hao J	Front Neurol	2020	PMC7773848		10.3389/fneur.2020.581539
23057548	SCN1A IVS5N+5 polymorphism and response to sodium valproate: a multicenter study	Haerian BS, Baum L, Tan HJ, Kwan P, Raymond AA, Saruwatari J, Nakagawa K, Mohamed Z.		Haerian BS	Pharmacogenomics	2012			10.2217/pgs.12.127
20875856	Scn1a missense mutation causes limbic hyperexcitability and vulnerability to experimental febrile seizures	Ohno Y, Ishihara S, Mashimo T, Sofue N, Shimizu S, Imaoku T, Tsurumi T, Sasa M, Serikawa T.		Ohno Y	Neurobiol Dis	2011			10.1016/j.nbd.2010.09.013
20707984	Scn1a missense mutation impairs GABAA receptor-mediated synaptic transmission in the rat hippocampus	Ohno Y, Sofue N, Ishihara S, Mashimo T, Sasa M, Serikawa T.		Ohno Y	Biochem Biophys Res Commun	2010			10.1016/j.bbrc.2010.08.021
15944908	SCN1A mutation analysis in myoclonic astatic epilepsy and severe idiopathic generalized epilepsy of infancy with generalized tonic-clonic seizures	Ebach K, Joos H, Doose H, Stephani U, Kurlemann G, Fiedler B, Hahn A, Hauser E, Hundt K, Holthausen H, M¨¹ller U, Neubauer BA.		Ebach K	Neuropediatrics	2005			10.1055/s-2005-865607
17679682	SCN1A mutation associated with atypical Panayiotopoulos syndrome	Grosso S, Orrico A, Galli L, Di Bartolo R, Sorrentino V, Balestri P.		Grosso S	Neurology	2007			10.1212/01.wnl.0000266666.10404.53
22550089	SCN1A mutation associated with intractable myoclonic epilepsy and migraine headache	Frosk P, Mhanni AA, Rafay MF.		Frosk P	J Child Neurol	2013			10.1177/0883073812443309
17054696	SCN1A mutation mosaicism in a family with severe myoclonic epilepsy in infancy	Morimoto M, Mazaki E, Nishimura A, Chiyonobu T, Sawai Y, Murakami A, Nakamura K, Inoue I, Ogiwara I, Sugimoto T, Yamakawa K.		Morimoto M	Epilepsia	2006			10.1111/j.1528-1167.2006.00645.x
27497770	SCN1A Mutation or Cross Talk? The Connection Between the Heart and Brain	Ozturk S, Yetkin E.		Ozturk S	Pediatr Neurol	2016			10.1016/j.pediatrneurol.2016.05.003
19782004	SCN1A mutation screening in adult patients with Lennox-Gastaut syndrome features	Selmer KK, Lund C, Brandal K, Undlien DE, Brodtkorb E.		Selmer KK	Epilepsy Behav	2009			10.1016/j.yebeh.2009.08.021
33108073	SCN1A mutation spectrum in a cohort of Bulgarian patients with GEFS+ phenotype	Peycheva V, Ivanova N, Kamenarova K, Panova M, Pacheva I, Ivanov I, Bojidarova M, Tacheva G, Stamatov D, Litvinenko I, Hristova D, Deneva D, Rodopska E, Slavkova E, Aleksandrova I, Simeonov E, Dimova P, Bojinova V, Mitev V, Jordanova A, Kaneva R.		Peycheva V	Turk J Pediatr	2020			10.24953/turkjped.2020.05.002
21868258	SCN1A mutational analysis in Korean patients with Dravet syndrome	Lim BC, Hwang H, Chae JH, Choi JE, Hwang YS, Kang SH, Ki CS, Kim KJ.		Lim BC	Seizure	2011			10.1016/j.seizure.2011.08.002
15880351	SCN1A mutations and epilepsy	Mulley JC, Scheffer IE, Petrou S, Dibbens LM, Berkovic SF, Harkin LA.		Mulley JC	Hum Mutat	2005			10.1002/humu.20178
22341965	SCN1A mutations in Dravet syndrome: impact of interneuron dysfunction on neural networks and cognitive outcome	Bender AC, Morse RP, Scott RC, Holmes GL, Lenck-Santini PP.		Bender AC	Epilepsy Behav	2012	PMC3307886	NIHMS357970	10.1016/j.yebeh.2011.11.022
30977726	SCN1A mutations in focal epilepsy with auditory features: widening the spectrum of GEFS plus	Bisulli F, Licchetta L, Baldassari S, Muccioli L, Marconi C, Cantalupo G, Myers C, Menghi V, Minardi R, Caporali L, Marini C, Guerrini R, Mefford HC, Tinuper P, Pippucci T.		Bisulli F	Epileptic Disord	2019			10.1684/epd.2019.1046
24076350	SCN1A rs3812718 polymorphism and susceptibility to epilepsy with febrile seizures: a meta-analysis	Tang L, Lu X, Tao Y, Zheng J, Zhao P, Li K, Li L.		Tang L	Gene	2014			10.1016/j.gene.2013.09.071
29605548	SCN1A rs3812718 polymorphism is associated with epilepsy: An updated meta-analysis	Zhi H, Wu C, Yang Z.		Zhi H	Epilepsy Res	2018			10.1016/j.eplepsyres.2018.03.016
20301494	SCN1A Seizure Disorders	Miller IO, Sotero de Menezes MA.		Miller IO	GeneReviews(?)	1993
21453355	SCN1A splice variants exhibit divergent sensitivity to commonly used antiepileptic drugs	Thompson CH, Kahlig KM, George AL Jr.		Thompson CH	Epilepsia	2011	PMC3093448	NIHMS269560	10.1111/j.1528-1167.2011.03040.x
23586701	SCN1A testing for epilepsy: application in clinical practice	Hirose S, Scheffer IE, Marini C, De Jonghe P, Andermann E, Goldman AM, Kauffman M, Tan NC, Lowenstein DH, Sisodiya SM, Ottman R, Berkovic SF; Genetics Commission of the International League Against Epilepsy.		Hirose S	Epilepsia	2013			10.1111/epi.12168
29952450	SCN1A Variant and Cannabidiol Use	Reynolds C, Finnegan R, Forman E, King MD.		Reynolds C	Ir Med J	2018
18616623	SCN1A variant in a Scandinavian GEFS+ family: a wolf in sheep's clothing?	Holland KD.		Holland KD	Acta Neurol Scand	2008			10.1111/j.1600-0404.2008.01060.x
29601086	SCN1A variants associated with sudden infant death syndrome	Brownstein CA, Goldstein RD, Thompson CH, Haynes RL, Giles E, Sheidley B, Bainbridge M, Haas EA, Mena OJ, Lucas J, Schaber B, Holm IA, George AL, Kinney HC, Poduri AH.		Brownstein CA	Epilepsia	2018	PMC6453530	NIHMS1010513	10.1111/epi.14055
31782251	SCN1A variants from bench to bedside-improved clinical prediction from functional characterization	Brunklaus A, Schorge S, Smith AD, Ghanty I, Stewart K, Gardiner S, Du J, P¨¦rez-Palma E, Symonds JD, Collier AC, Lal D, Zuberi SM.		Brunklaus A	Hum Mutat	2020			10.1002/humu.23943
31755124	SCN1A Variants in vaccine-related febrile seizures: A prospective study	Damiano JA, Deng L, Li W, Burgess R, Schneider AL, Crawford NW, Buttery J, Gold M, Richmond P, Macartney KK, Hildebrand MS, Scheffer IE, Wood N, Berkovic SF.		Damiano JA	Ann Neurol	2020			10.1002/ana.25650
24342961	SCN1A variations and response to multiple antiepileptic drugs	Yip TS, O'Doherty C, Tan NC, Dibbens LM, Suppiah V.		Yip TS	Pharmacogenomics J	2014			10.1038/tpj.2013.43
25823783	SCN1A, ABCC2 and UGT2B7 gene polymorphisms in association with individualized oxcarbazepine therapy	Ma CL, Wu XY, Jiao Z, Hong Z, Wu ZY, Zhong MK.		Ma CL	Pharmacogenomics	2015			10.2217/pgs.14.186
18566737	SCN1A, SCN1B, and GABRG2 gene mutation analysis in Chinese families with generalized epilepsy with febrile seizures plus	Sun H, Zhang Y, Liang J, Liu X, Ma X, Wu H, Xu K, Qin J, Qi Y, Wu X.		Sun H	J Hum Genet	2008			10.1007/s10038-008-0306-y
23859570	SCN1A, SCN2A and SCN3A gene polymorphisms and responsiveness to antiepileptic drugs: a multicenter cohort study and meta-analysis	Haerian BS, Baum L, Kwan P, Tan HJ, Raymond AA, Mohamed Z.		Haerian BS	Pharmacogenomics	2013			10.2217/pgs.13.104
31904127	SCN1A/Na(V) 1.1 channelopathies: Mechanisms in expression systems, animal models, and human iPSC models	Mantegazza M, Broccoli V.		Mantegazza M	Epilepsia	2019			10.1111/epi.14700
23466530	SCN1AIVS5-91G>A polymorphism is associated with susceptibility to epilepsy but not with drug responsiveness	Kumari R, Lakhan R, Kumar S, Garg RK, Misra UK, Kalita J, Mittal B.		Kumari R	Biochimie	2013			10.1016/j.biochi.2013.02.006
34174751	SCN1A-related epilepsy with recessive inheritance: Two further families	Moretti R, Arnaud L, Bouteiller D, Trouillard O, Moreau P, Buratti J, Rastetter A, Keren B, Des Portes V, Toulouse J, Gourfinkel-An I, Leguern E, Depienne C, Mignot C, Nava C.		Moretti R	Eur J Paediatr Neurol	2021			10.1016/j.ejpn.2021.05.018
31904117	SCN1A-related phenotypes: Epilepsy and beyond	Scheffer IE, Nabbout R.		Scheffer IE	Epilepsia	2019			10.1111/epi.16386
30921204	SCN1B and SCN2B gene variants analysis in dravet syndrome patients: Analysis of 22 cases	Gong JE, Liao HM, Long HY, Li XM, Long LL, Zhou L, Gu WP, Lu SH, Qu Q, Yang LM, Xiao B, Qu J.		Gong JE	Medicine (Baltimore)	2019	PMC6455785		10.1097/MD.0000000000014974
27595042	SCN2A-Related Early-Onset Epileptic Encephalopathy Responsive to Phenobarbital	Baumer FM, Peters JM, El Achkar CM, Pearl PL.		Baumer FM	J Pediatr Epilepsy	2016	PMC5004990	NIHMS780663	10.1055/s-0035-1567853
28235671	SCN3A deficiency associated with increased seizure susceptibility	Lamar T, Vanoye CG, Calhoun J, Wong JC, Dutton SBB, Jorge BS, Velinov M, Escayg A, Kearney JA.		Lamar T	Neurobiol Dis	2017	PMC5446790	NIHMS858473	10.1016/j.nbd.2017.02.006
31943325	Scn8a Antisense Oligonucleotide Is Protective in Mouse Models of SCN8A Encephalopathy and Dravet Syndrome	Lenk GM, Jafar-Nejad P, Hill SF, Huffman LD, Smolen CE, Wagnon JL, Petit H, Yu W, Ziobro J, Bhatia K, Parent J, Giger RJ, Rigo F, Meisler MH.		Lenk GM	Ann Neurol	2020	PMC7064908		10.1002/ana.25676
27270488	SCN8A encephalopathy: Research progress and prospects	Meisler MH, Helman G, Hammer MF, Fureman BE, Gaillard WD, Goldin AL, Hirose S, Ishii A, Kroner BL, Lossin C, Mefford HC, Parent JM, Patel M, Schreiber J, Stewart R, Whittemore V, Wilcox K, Wagnon JL, Pearl PL, Vanderver A, Scheffer IE.		Meisler MH	Epilepsia	2016	PMC5495462	NIHMS872321	10.1111/epi.13422
24498617	Screening of CACNA1A and ATP1A2 genes in hemiplegic migraine: clinical, genetic, and functional studies	Carre?o O, Corominas R, Serra SA, Sintas C, Fern¨¢ndez-Castillo N, Vila-Pueyo M, Toma C, Gen¨¦ GG, Pons R, Llaneza M, Sobrido MJ, Grinberg D, Valverde M¨¢, Fern¨¢ndez-Fern¨¢ndez JM, Macaya A, Cormand B.		Carre?o O	Mol Genet Genomic Med	2013	PMC3865589		10.1002/mgg3.24
28491900	Screening of conventional anticonvulsants in a genetic mouse model of epilepsy	Hawkins NA, Anderson LL, Gertler TS, Laux L, George AL Jr, Kearney JA.		Hawkins NA	Ann Clin Transl Neurol	2017	PMC5420810		10.1002/acn3.413
26293783	Seizing control of epileptic activity can improve outcome	Chapman KE, Specchio N, Shinnar S, Holmes GL.		Chapman KE	Epilepsia	2015			10.1111/epi.13109
25667824	Seizure control in a patient with Dravet syndrome and cystic fibrosis	Schmalbach B, Moeller B, von Spiczak S, Muhle H, Stephani U, Lang N.		Schmalbach B	Epilepsy Behav Case Rep	2013	PMC4150651		10.1016/j.ebcr.2013.02.001
34475263	Seizure Phenotype and Underlying Cellular Defects in Drosophila Knock-In Models of DS (R1648C) and GEFS+ (R1648H) SCN1A Epilepsy	Roemmich AJ, Vu T, Lukacsovich T, Hawkins C, Schutte SS, O'Dowd DK.		Roemmich AJ	eNeuro	2021	PMC8454921		10.1523/ENEURO.0002-21.2021
26021464	Seizure precipitants in Dravet syndrome: What events and activities are specifically provocative compared with other epilepsies?	Verbeek NE, Wassenaar M, van Campen JS, Sonsma A, Gunning B, Knoers N, Lindhout D, Jansen FE, Leijten F, Brilstra EH, Kasteleijn-Nolst Trenit¨¦ D.		Verbeek NE	Epilepsy Behav	2015			10.1016/j.yebeh.2015.05.008
24955329	Seizure Reduction with Fluoxetine in Dravet Syndrome	Meador KJ.		Meador KJ	Epilepsy Behav Case Rep	2014	PMC4062308	NIHMS588831	10.1016/j.ebcr.2014.03.001
34033256	Seizures in Sotos syndrome: Phenotyping in 49 patients	Fortin O, Vincelette C, Khan AQ, Berrahmoune S, Dassi C, Karimi M, Scheffer IE, Lu J, Davis K, Myers KA.		Fortin O	Epilepsia Open	2021	PMC8166795		10.1002/epi4.12484
16302874	Seizures of idiopathic generalized epilepsies	Dur¨®n RM, Medina MT, Mart¨ªnez-Ju¨¢rez IE, Bailey JN, Perez-Gosiengfiao KT, Ramos-Ram¨ªrez R, L¨®pez-Ruiz M, Alonso ME, Ortega RH, Pascual-Castroviejo I, Machado-Salas J, Mija L, Delgado-Escueta AV.		Dur¨®n RM	Epilepsia	2005			10.1111/j.1528-1167.2005.00312.x
12900796	Selection and evaluation of tagging SNPs in the neuronal-sodium-channel gene SCN1A: implications for linkage-disequilibrium gene mapping	Weale ME, Depondt C, Macdonald SJ, Smith A, Lai PS, Shorvon SD, Wood NW, Goldstein DB.		Weale ME	Am J Hum Genet	2003	PMC1180680		10.1086/378098
30076230	Selective Na(V)1.1 activation rescues Dravet syndrome mice from seizures and premature death	Richards KL, Milligan CJ, Richardson RJ, Jancovski N, Grunnet M, Jacobson LH, Undheim EAB, Mobli M, Chow CY, Herzig V, Csoti A, Panyi G, Reid CA, King GF, Petrou S.		Richards KL	Proc Natl Acad Sci U S A	2018	PMC6112713		10.1073/pnas.1804764115
27281198	Selective spider toxins reveal a role for the Nav1.1 channel in mechanical pain	Osteen JD, Herzig V, Gilchrist J, Emrick JJ, Zhang C, Wang X, Castro J, Garcia-Caraballo S, Grundy L, Rychkov GY, Weyer AD, Dekan Z, Undheim EA, Alewood P, Stucky CL, Brierley SM, Basbaum AI, Bosmans F, King GF, Julius D.		Osteen JD	Nature	2016	PMC4919188	NIHMS775869	10.1038/nature17976
29317669	Selective targeting of Scn8a prevents seizure development in a mouse model of mesial temporal lobe epilepsy	Wong JC, Makinson CD, Lamar T, Cheng Q, Wingard JC, Terwilliger EF, Escayg A.		Wong JC	Sci Rep	2018	PMC5760706		10.1038/s41598-017-17786-0
33387902	Self-limited focal epilepsy and childhood apraxia of speech with WAC pathogenic variants	Alawadhi A, Morgan AT, Mucha BE, Scheffer IE, Myers KA.		Alawadhi A	Eur J Paediatr Neurol	2021			10.1016/j.ejpn.2020.12.010
18632931	Self-limited hyperexcitability: functional effect of a familial hemiplegic migraine mutation of the Nav1.1 (SCN1A) Na+ channel	Cest¨¨le S, Scalmani P, Rusconi R, Terragni B, Franceschetti S, Mantegazza M.		Cest¨¨le S	J Neurosci	2008	PMC2721955	HALMS376508	10.1523/JNEUROSCI.4453-07.2008
32853554	Semantic Similarity Analysis Reveals Robust Gene-Disease Relationships in Developmental and Epileptic Encephalopathies	Galer PD, Ganesan S, Lewis-Smith D, McKeown SE, Pendziwiat M, Helbig KL, Ellis CA, Rademacher A, Smith L, Poduri A, Seiffert S, von Spiczak S, Muhle H, van Baalen A; NCEE Study Group; EPGP Investigators; EuroEPINOMICS-RES Consortium; Genomics Research and Innovation Network, Thomas RH, Krause R, Weber Y, Helbig I.		Galer PD	Am J Hum Genet	2020	PMC7536581		10.1016/j.ajhg.2020.08.003
31445030	Serotonin abnormalities in Dravet syndrome mice before and after the age of seizure onset	Hatini PG, Commons KG.		Hatini PG	Brain Res	2019	PMC6922539	NIHMS1543346	10.1016/j.brainres.2019.146399
18554359	Seven novel SCN1A mutations in Chinese patients with severe myoclonic epilepsy of infancy	Sun H, Zhang Y, Liang J, Liu X, Ma X, Qin J, Qi Y, Wu X.		Sun H	Epilepsia	2008			10.1111/j.1528-1167.2008.01549_2.x
16464983	Severe epilepsy resulting from genetic interaction between Scn2a and Kcnq2	Kearney JA, Yang Y, Beyer B, Bergren SK, Claes L, Dejonghe P, Frankel WN.		Kearney JA	Hum Mol Genet	2006			10.1093/hmg/ddl019
19666879	Severe epilepsy syndromes of early childhood: the link between genetics and pathophysiology with a focus on SCN1A mutations	Stafstrom CE.		Stafstrom CE	J Child Neurol	2009			10.1177/0883073809338152
15249644	Severe epilepsy, retardation, and dysmorphic features with a 2q deletion including SCN1A and SCN2A	Pereira S, Vieira JP, Barroca F, Roll P, Carvalhas R, Cau P, Sequeira S, Genton P, Szepetowski P.		Pereira S	Neurology	2004			10.1212/01.wnl.0000132844.20654.c1
12566273	Severe infantile epilepsies: molecular genetics challenge clinical classification	Scheffer IE.		Scheffer IE	Brain	2003			10.1093/brain/awg047
22140375	Severe Myoclonic Epilepsy in Infancy - Adult Phenotype with Bradykinesia, Hypomimia, and Perseverative Behavior: Report of Five Cases	Martin P, Rautenstrau¦Â B, Abicht A, Fahrbach J, Koster S.		Martin P	Mol Syndromol	2010	PMC3214946		10.1159/000326746
21463271	Severe myoclonic epilepsy in infancy (Dravet syndrome) 30 years later	Dravet C, Bureau M, Dalla Bernardina B, Guerrini R.		Dravet C	Epilepsia	2011			10.1111/j.1528-1167.2011.02993.x
15508916	Severe myoclonic epilepsy in infancy: clinical analysis and relation to SCN1A mutations in a Japanese cohort	Oguni H, Hayashi K, Osawa M, Awaya Y, Fukuyama Y, Fukuma G, Hirose S, Mitsudome A, Kaneko S.		Oguni H	Adv Neurol	2005
15526956	Severe myoclonic epilepsy in infancy: toward an optimal treatment	Ceulemans B, Boel M, Claes L, Dom L, Willekens H, Thiry P, Lagae L.		Ceulemans B	J Child Neurol	2004			10.1177/08830738040190070701
22028529	Severe myoclonic epilepsy of infancy (Dravet syndrome): Clinical and genetic features of nine Turkish patients	Ozmen M, Dilber C, Tatl? B, Ayd?nl? N, Cal??kan M, Ekici B.		Ozmen M	Ann Indian Acad Neurol	2011	PMC3200039		10.4103/0972-2327.85879
17190949	Severe myoclonic epilepsy of infancy (Dravet syndrome): recognition and diagnosis in adults	Jansen FE, Sadleir LG, Harkin LA, Vadlamudi L, McMahon JM, Mulley JC, Scheffer IE, Berkovic SF.		Jansen FE	Neurology	2006			10.1212/01.wnl.0000249312.73155.7d
17105460	Severe myoclonic epilepsy of infants (Dravet syndrome): natural history and neuropsychological findings	Wolff M, Cass¨¦-Perrot C, Dravet C.		Wolff M	Epilepsia	2006			10.1111/j.1528-1167.2006.00688.x
29329111	Severe peri-ictal respiratory dysfunction is common in Dravet syndrome	Kim Y, Bravo E, Thirnbeck CK, Smith-Mellecker LA, Kim SH, Gehlbach BK, Laux LC, Zhou X, Nordli DR Jr, Richerson GB.		Kim Y	J Clin Invest	2018	PMC5824857		10.1172/JCI94999
20358620	Severe pulmonary emphysema in a girl with interstitial deletion of 2q24.2q24.3 including ITGB6	Takatsuki S, Nakamura R, Haga Y, Mitsui K, Hashimoto T, Shimojima K, Saji T, Yamamoto T.		Takatsuki S	Am J Med Genet A	2010			10.1002/ajmg.a.33362
31830809	Sexually Divergent Mortality and Partial Phenotypic Rescue After Gene Therapy in a Mouse Model of Dravet Syndrome	Niibori Y, Lee SJ, Minassian BA, Hampson DR.		Niibori Y	Hum Gene Ther	2020	PMC7087406		10.1089/hum.2019.225
28527083	Shared mechanisms of epilepsy, migraine and affective disorders	Zarcone D, Corbetta S.		Zarcone D	Neurol Sci	2017			10.1007/s10072-017-2902-0
12083760	Significant correlation of the SCN1A mutations and severe myoclonic epilepsy in infancy	Ohmori I, Ouchida M, Ohtsuka Y, Oka E, Shimizu K.		Ohmori I	Biochem Biophys Res Commun	2002			10.1016/s0006-291x(02)00617-4
21236736	Similar but not identical: clinical implications for molecular studies in monozygotic discordant twins with epilepsy	Striano P, Bianchi A, Pezzella M, Zara F.		Striano P	Epilepsy Behav	2011			10.1016/j.yebeh.2010.12.007
16380441	Single-channel properties of human NaV1.1 and mechanism of channel dysfunction in SCN1A-associated epilepsy	Vanoye CG, Lossin C, Rhodes TH, George AL Jr.		Vanoye CG	J Gen Physiol	2006	PMC2151481		10.1085/jgp.200509373
24656210	Sleep abnormalities in children with Dravet syndrome	Dhamija R, Erickson MK, St Louis EK, Wirrell E, Kotagal S.		Dhamija R	Pediatr Neurol	2014			10.1016/j.pediatrneurol.2014.01.017
25766678	Sleep impairment and reduced interneuron excitability in a mouse model of Dravet Syndrome	Kalume F, Oakley JC, Westenbroek RE, Gile J, de la Iglesia HO, Scheuer T, Catterall WA.		Kalume F	Neurobiol Dis	2015	PMC4402280	NIHMS670855	10.1016/j.nbd.2015.02.016
30705357	Small changes in synaptic gain lead to seizure-like activity in neuronal network at criticality	Du J, Vegh V, Reutens DC.		Du J	Sci Rep	2019	PMC6355815		10.1038/s41598-018-37646-9
32897040	Small-fibre pathology has no impact on somatosensory system function in patients with fibromyalgia	Fasolino A, Di Stefano G, Leone C, Galosi E, Gioia C, Lucchino B, Terracciano A, Di Franco M, Cruccu G, Truini A.		Fasolino A	Pain	2020			10.1097/j.pain.0000000000001920
19464834	Sodium and potassium channel dysfunctions in rare and common idiopathic epilepsy syndromes	Hahn A, Neubauer BA.		Hahn A	Brain Dev	2009			10.1016/j.braindev.2009.04.012
19115387	Sodium channel activity modulates multiple functions in microglia	Black JA, Liu S, Waxman SG.		Black JA	Glia	2009			10.1002/glia.20830
14504318	Sodium channel alpha1-subunit mutations in severe myoclonic epilepsy of infancy and infantile spasms	Wallace RH, Hodgson BL, Grinton BE, Gardiner RM, Robinson R, Rodriguez-Casero V, Sadleir L, Morgan J, Harkin LA, Dibbens LM, Yamamoto T, Andermann E, Mulley JC, Berkovic SF, Scheffer IE.		Wallace RH	Neurology	2003			10.1212/01.wnl.0000086379.71183.78
16210358	Sodium channel dysfunction in intractable childhood epilepsy with generalized tonic-clonic seizures	Rhodes TH, Vanoye CG, Ohmori I, Ogiwara I, Yamakawa K, George AL Jr.		Rhodes TH	J Physiol	2005	PMC1464244		10.1113/jphysiol.2005.094326
32227486	Sodium channel epilepsies and neurodevelopmental disorders: from disease mechanisms to clinical application	Brunklaus A, Lal D.		Brunklaus A	Dev Med Child Neurol	2020			10.1111/dmcn.14519
12086630	Sodium channel gating: no margin for error	Cannon SC.		Cannon SC	Neuron	2002			10.1016/s0896-6273(02)00735-3
20351042	Sodium channel gene family: epilepsy mutations, gene interactions and modifier effects	Meisler MH, O'Brien JE, Sharkey LM.		Meisler MH	J Physiol	2010	PMC2901972		10.1113/jphysiol.2010.188482
24665294	Sodium Channel Gene Mutations in Children with GEFS+ and Dravet Syndrome: A Cross Sectional Study	TONEKABONI SH, EBRAHIMI A, BAKHSHANDEH BALI MK, TAHERI OTAGHSARA SM, HOUSHMAND M, NASEHI MM, TAGHDIRI MM, MOGHADDASI M.		TONEKABONI SH	Iran J Child Neurol	2013	PMC3943035
16075041	Sodium channel mutations in epilepsy and other neurological disorders	Meisler MH, Kearney JA.		Meisler MH	J Clin Invest	2005	PMC1180547		10.1172/JCI25466
20831750	Sodium channel SCN1A and epilepsy: mutations and mechanisms	Escayg A, Goldin AL.		Escayg A	Epilepsia	2010	PMC2937162	NIHMS197679	10.1111/j.1528-1167.2010.02640.x
30146301	Sodium Channel SCN3A (Na(V)1.3) Regulation of Human Cerebral Cortical Folding and Oral Motor Development	Smith RS, Kenny CJ, Ganesh V, Jang A, Borges-Monroy R, Partlow JN, Hill RS, Shin T, Chen AY, Doan RN, Anttonen AK, Ignatius J, Medne L, B?nnemann CG, Hecht JL, Salonen O, Barkovich AJ, Poduri A, Wilke M, de Wit MCY, Mancini GMS, Sztriha L, Im K, Amrom D, Andermann E, Paetau R, Lehesjoki AE, Walsh CA, Lehtinen MK.		Smith RS	Neuron	2018	PMC6226006	NIHMS992080	10.1016/j.neuron.2018.07.052
28758202	Sodium channel subtypes are differentially localized to pre- and post-synaptic sites in rat hippocampus	Johnson KW, Herold KF, Milner TA, Hemmings HC Jr, Platholi J.		Johnson KW	J Comp Neurol	2017	PMC5927368	NIHMS959984	10.1002/cne.24291
20101409	Sodium channelopathies and pain	Lampert A, O'Reilly AO, Reeh P, Leffler A.		Lampert A	Pflugers Arch	2010			10.1007/s00424-009-0779-3
33531663	Sodium channelopathies in neurodevelopmental disorders	Meisler MH, Hill SF, Yu W.		Meisler MH	Nat Rev Neurosci	2021			10.1038/s41583-020-00418-4
22905747	Sodium channels and the neurobiology of epilepsy	Oliva M, Berkovic SF, Petrou S.		Oliva M	Epilepsia	2012			10.1111/j.1528-1167.2012.03631.x
12610651	Sodium channels SCN1A, SCN2A and SCN3A in familial autism	Weiss LA, Escayg A, Kearney JA, Trudeau M, MacDonald BT, Mori M, Reichert J, Buxbaum JD, Meisler MH.		Weiss LA	Mol Psychiatry	2003			10.1038/sj.mp.4001241
15917456	Sodium currents in medullary neurons isolated from the pre-B?tzinger complex region	Ptak K, Zummo GG, Alheid GF, Tkatch T, Surmeier DJ, McCrimmon DR.		Ptak K	J Neurosci	2005	PMC6724824		10.1523/JNEUROSCI.4238-04.2005
29188487	Sodium Metabisulfite: Effects on Ionic Currents and Excitotoxicity	Lai MC, Hung TY, Lin KM, Sung PS, Wu SJ, Yang CS, Wu YJ, Tsai JJ, Wu SN, Huang CW.		Lai MC	Neurotox Res	2018			10.1007/s12640-017-9844-4
16430863	Somatic and germline mosaicisms in severe myoclonic epilepsy of infancy	Gennaro E, Santorelli FM, Bertini E, Buti D, Gaggero R, Gobbi G, Lini M, Granata T, Freri E, Parmeggiani A, Striano P, Veggiotti P, Cardinali S, Bricarelli FD, Minetti C, Zara F.		Gennaro E	Biochem Biophys Res Commun	2006			10.1016/j.bbrc.2005.12.209
29341473	Somatic mosaic deletions involving SCN1A cause Dravet syndrome	Nakayama T, Ishii A, Yoshida T, Nasu H, Shimojima K, Yamamoto T, Kure S, Hirose S.		Nakayama T	Am J Med Genet A	2018			10.1002/ajmg.a.38596
27889818	Somatosensory reflex seizures in a child with epilepsy related to novel SCN1A mutation	Arican P, Dundar NO, Cavusoglu D, Ozdem?r TR, Gencpinar P.		Arican P	Childs Nerv Syst	2017			10.1007/s00381-016-3297-6
34013884	Somatostatin-expressing parafacial neurons are CO(2)/H(+) sensitive and regulate baseline breathing	Cleary CM, Milla BM, Kuo FS, James S, Flynn WF, Robson P, Mulkey DK.		Cleary CM	Elife	2021	PMC8169115		10.7554/eLife.60317
34510432	Soticlestat, a novel cholesterol 24-hydroxylase inhibitor, reduces seizures and premature death in Dravet syndrome mice	Hawkins NA, Jurado M, Thaxton TT, Duarte SE, Barse L, Tatsukawa T, Yamakawa K, Nishi T, Kondo S, Miyamoto M, Abrahams BS, During MJ, Kearney JA.		Hawkins NA	Epilepsia	2021			10.1111/epi.17062
22908258	Specific deletion of NaV1.1 sodium channels in inhibitory interneurons causes seizures and premature death in a mouse model of Dravet syndrome	Cheah CS, Yu FH, Westenbroek RE, Kalume FK, Oakley JC, Potter GB, Rubenstein JL, Catterall WA.		Cheah CS	Proc Natl Acad Sci U S A	2012	PMC3437823		10.1073/pnas.1211591109
18930999	Spectrum of SCN1A gene mutations associated with Dravet syndrome: analysis of 333 patients	Depienne C, Trouillard O, Saint-Martin C, Gourfinkel-An I, Bouteiller D, Carpentier W, Keren B, Abert B, Gautier A, Baulac S, Arzimanoglou A, Cazeneuve C, Nabbout R, LeGuern E.		Depienne C	J Med Genet	2009			10.1136/jmg.2008.062323
12821740	Spectrum of SCN1A mutations in severe myoclonic epilepsy of infancy	Nabbout R, Gennaro E, Dalla Bernardina B, Dulac O, Madia F, Bertini E, Capovilla G, Chiron C, Cristofori G, Elia M, Fontana E, Gaggero R, Granata T, Guerrini R, Loi M, La Selva L, Lispi ML, Matricardi A, Romeo A, Tzolas V, Valseriati D, Veggiotti P, Vigevano F, Vall¨¦e L, Dagna Bricarelli F, Bianchi A, Zara F.		Nabbout R	Neurology	2003			10.1212/01.wnl.0000069463.41870.2f
22495309	Sporadic autism exomes reveal a highly interconnected protein network of de novo mutations	O'Roak BJ, Vives L, Girirajan S, Karakoc E, Krumm N, Coe BP, Levy R, Ko A, Lee C, Smith JD, Turner EH, Stanaway IB, Vernot B, Malig M, Baker C, Reilly B, Akey JM, Borenstein E, Rieder MJ, Nickerson DA, Bernier R, Shendure J, Eichler EE.		O'Roak BJ	Nature	2012	PMC3350576	NIHMS359279	10.1038/nature10989
20739784	Sporadic hemiplegic migraine in children	Pienczk-Reclawowicz K, Pilarska E, Lemka M.		Pienczk-Reclawowicz K	Neurol India	2010			10.4103/0028-3886.68659
19214208	Sporadic infantile epileptic encephalopathy caused by mutations in PCDH19 resembles Dravet syndrome but mainly affects females	Depienne C, Bouteiller D, Keren B, Cheuret E, Poirier K, Trouillard O, Benyahia B, Quelin C, Carpentier W, Julia S, Afenjar A, Gautier A, Rivier F, Meyer S, Berquin P, H¨¦lias M, Py I, Rivera S, Bahi-Buisson N, Gourfinkel-An I, Cazeneuve C, Ruberg M, Brice A, Nabbout R, Leguern E.		Depienne C	PLoS Genet	2009	PMC2633044		10.1371/journal.pgen.1000381
25855492	Spreading depolarization in the brainstem mediates sudden cardiorespiratory arrest in mouse SUDEP models	Aiba I, Noebels JL.		Aiba I	Sci Transl Med	2015	PMC4852131	NIHMS775316	10.1126/scitranslmed.aaa4050
26790420	Src family tyrosine kinase inhibitors suppress Nav1.1 expression in cultured rat spiral ganglion neurons	Chen H, Zeng Q, Yao C, Cai Z, Wei T, Huang Z, Su J.		Chen H	J Comp Physiol A Neuroethol Sens Neural Behav Physiol	2016			10.1007/s00359-016-1066-3
33084037	Starting stiripentol in adults with Dravet syndrome? Watch for ammonia and carnitine	Zulfiqar Ali Q, Marques P, Selvarajah A, Tabarestani S, Sadoway T, Andrade DM.		Zulfiqar Ali Q	Epilepsia	2020			10.1111/epi.16684
29473155	Stiripentol efficacy and safety in Dravet syndrome: a 12-year observational study	Myers KA, Lightfoot P, Patil SG, Cross JH, Scheffer IE.		Myers KA	Dev Med Child Neurol	2018			10.1111/dmcn.13704
30900478	Stiripentol for the treatment of seizures associated with Dravet syndrome	Chiron C.		Chiron C	Expert Rev Neurother	2019			10.1080/14737175.2019.1593142
24434335	Strain- and age-dependent hippocampal neuron sodium currents correlate with epilepsy severity in Dravet syndrome mice	Mistry AM, Thompson CH, Miller AR, Vanoye CG, George AL Jr, Kearney JA.		Mistry AM	Neurobiol Dis	2014	PMC3968814	NIHMS556008	10.1016/j.nbd.2014.01.006
28150151	Structure-based assessment of disease-related mutations in human voltage-gated sodium channels	Huang W, Liu M, Yan SF, Yan N.		Huang W	Protein Cell	2017	PMC5445024		10.1007/s13238-017-0372-z
27905812	STXBP1 Encephalopathy with Epilepsy	Khaikin Y, Mercimek-Andrews S.		Khaikin Y	GeneReviews(?)	1993
31176277	Successful treatment of intractable life-threatening seizures with perampanel in the first case of early myoclonic encephalopathy with a novel de novo SCN1A mutation	Ishikawa N, Tateishi Y, Tani H, Kobayashi Y, Itai T, Miyatake S, Kato M, Matsumoto N, Kobayashi M.		Ishikawa N	Seizure	2019			10.1016/j.seizure.2019.05.024
32167579	Successful use of fenfluramine in nonconvulsive status epilepticus of Dravet syndrome	Specchio N, Pietrafusa N, Ferretti A, Trivisano M, Vigevano F.		Specchio N	Epilepsia	2020			10.1111/epi.16474
32532910	Successful utilisation of epidural analgesia for perioperative pain management in a child with sodium voltage-gated channel alpha subunit (SCN1A) gene mutation	Sobey JH, Menser CC, Reddy SK, Hughes EM.		Sobey JH	BMJ Case Rep	2020	PMC7295372		10.1136/bcr-2020-234314
23524959	Sudden death in epilepsy: of mice and men	Friedman D, Chyou J, Devinsky O.		Friedman D	J Clin Invest	2013	PMC3613934		10.1172/JCI67759
32949224	Sudden death in epilepsy: There is room for intracranial pressure	Dibu¨¦ M, Spoor JKH, Dremmen M, von Sa? CF, H?nggi D, Steiger HJ, Ryvlin P, Kamp MA.		Dibu¨¦ M	Brain Behav	2020	PMC7667321		10.1002/brb3.1838
23524966	Sudden unexpected death in a mouse model of Dravet syndrome	Kalume F, Westenbroek RE, Cheah CS, Yu FH, Oakley JC, Scheuer T, Catterall WA.		Kalume F	J Clin Invest	2013	PMC3613924		10.1172/JCI66220
23850567	Sudden unexpected death in Dravet syndrome: respiratory and other physiological dysfunctions	Kalume F.		Kalume F	Respir Physiol Neurobiol	2013	PMC7213775	NIHMS504145	10.1016/j.resp.2013.06.026
26749013	Sudden unexpected death in epilepsy genetics: Molecular diagnostics and prevention	Goldman AM, Behr ER, Semsarian C, Bagnall RD, Sisodiya S, Cooper PN.		Goldman AM	Epilepsia	2016	PMC5034873	NIHMS777680	10.1111/epi.13232
30660056	Sudden unexpected death in GEFS+ families with sodium channel pathogenic variants	Myers KA, Shevell MI, S¨¦bire G.		Myers KA	Epilepsy Res	2019			10.1016/j.eplepsyres.2019.01.009
26803335	Supraventricular Tachycardia During Status Epilepticus in Dravet Syndrome: A Link Between Brain and Heart?	Daverio M, Ciccone O, Boniver C, De Palma L, Corrado D, Vecchi M.		Daverio M	Pediatr Neurol	2016			10.1016/j.pediatrneurol.2015.12.003
23424217	Synergistic GABA-enhancing therapy against seizures in a mouse model of Dravet syndrome	Oakley JC, Cho AR, Cheah CS, Scheuer T, Catterall WA.		Oakley JC	J Pharmacol Exp Ther	2013	PMC3629796		10.1124/jpet.113.203331
19592486	Synthesis, solution structure, and phylum selectivity of a spider delta-toxin that slows inactivation of specific voltage-gated sodium channel subtypes	Yamaji N, Little MJ, Nishio H, Billen B, Villegas E, Nishiuchi Y, Tytgat J, Nicholson GM, Corzo G.		Yamaji N	J Biol Chem	2009	PMC2782047		10.1074/jbc.M109.030841
18056581	Systematic analysis of three FHM genes in 39 sporadic patients with hemiplegic migraine	de Vries B, Freilinger T, Vanmolkot KR, Koenderink JB, Stam AH, Terwindt GM, Babini E, van den Boogerd EH, van den Heuvel JJ, Frants RR, Haan J, Pusch M, van den Maagdenberg AM, Ferrari MD, Dichgans M.		de Vries B	Neurology	2007			10.1212/01.wnl.0000295670.01629.5a
34025276	TANGO With SCN1A: Can This Molecular Dance Defeat Dravet Syndrome?	Wagnon JL.		Wagnon JL	Epilepsy Curr	2020	PMC7863313		10.1177/1535759720975750
23662938	Targeted capture and sequencing for detection of mutations causing early onset epileptic encephalopathy	Kodera H, Kato M, Nord AS, Walsh T, Lee M, Yamanaka G, Tohyama J, Nakamura K, Nakagawa E, Ikeda T, Ben-Zeev B, Lev D, Lerman-Sagie T, Straussberg R, Tanabe S, Ueda K, Amamoto M, Ohta S, Nonoda Y, Nishiyama K, Tsurusaki Y, Nakashima M, Miyake N, Hayasaka K, King MC, Matsumoto N, Saitsu H.		Kodera H	Epilepsia	2013			10.1111/epi.12203
26637798	Targeted DNA Sequencing from Autism Spectrum Disorder Brains Implicates Multiple Genetic Mechanisms	D'Gama AM, Pochareddy S, Li M, Jamuar SS, Reiff RE, Lam AN, Sestan N, Walsh CA.		D'Gama AM	Neuron	2015	PMC4672379	NIHMS737967	10.1016/j.neuron.2015.11.009
29455050	Targeted gene panel and genotype-phenotype correlation in children with developmental and epileptic encephalopathy	Ko A, Youn SE, Kim SH, Lee JS, Kim S, Choi JR, Kim HD, Lee ST, Kang HC.		Ko A	Epilepsy Res	2018			10.1016/j.eplepsyres.2018.02.003
32139178	Targeted gene panel sequencing in early infantile onset developmental and epileptic encephalopathy	Na JH, Shin S, Yang D, Kim B, Kim HD, Kim S, Lee JS, Choi JR, Lee ST, Kang HC.		Na JH	Brain Dev	2020			10.1016/j.braindev.2020.02.004
31056551	Targeted gene sequencing in 6994 individuals with neurodevelopmental disorder with epilepsy	Heyne HO, Artomov M, Battke F, Bianchini C, Smith DR, Liebmann N, Tadigotla V, Stanley CM, Lal D, Rehm H, Lerche H, Daly MJ, Helbig I, Biskup S, Weber YG, Lemke JR.		Heyne HO	Genet Med	2019			10.1038/s41436-019-0531-0
22612257	Targeted next generation sequencing as a diagnostic tool in epileptic disorders	Lemke JR, Riesch E, Scheurenbrand T, Schubach M, Wilhelm C, Steiner I, Hansen J, Courage C, Gallati S, B¨¹rki S, Strozzi S, Simonetti BG, Grunt S, Steinlin M, Alber M, Wolff M, Klopstock T, Prott EC, Lorenz R, Spaich C, Rona S, Lakshminarasimhan M, Kr?ll J, Dorn T, Kr?mer G, Synofzik M, Becker F, Weber YG, Lerche H, B?hm D, Biskup S.		Lemke JR	Epilepsia	2012			10.1111/j.1528-1167.2012.03516.x
27734276	Targeted next generation sequencing: the diagnostic value in early-onset epileptic encephalopathy	Gokben S, Onay H, Yilmaz S, Atik T, Serdaroglu G, Tekin H, Ozkinay F.		Gokben S	Acta Neurol Belg	2017			10.1007/s13760-016-0709-z
23708187	Targeted resequencing in epileptic encephalopathies identifies de novo mutations in CHD2 and SYNGAP1	Carvill GL, Heavin SB, Yendle SC, McMahon JM, O'Roak BJ, Cook J, Khan A, Dorschner MO, Weaver M, Calvert S, Malone S, Wallace G, Stanley T, Bye AM, Bleasel A, Howell KB, Kivity S, Mackay MT, Rodriguez-Casero V, Webster R, Korczyn A, Afawi Z, Zelnick N, Lerman-Sagie T, Lev D, M?ller RS, Gill D, Andrade DM, Freeman JL, Sadleir LG, Shendure J, Berkovic SF, Scheffer IE, Mefford HC.		Carvill GL	Nat Genet	2013	PMC3704157	NIHMS474984	10.1038/ng.2646
33971653	Targeting Poison Exons to Treat Developmental and Epileptic Encephalopathy	Aziz MC, Schneider PN, Carvill GL.		Aziz MC	Dev Neurosci	2021			10.1159/000516143
25042160	Tau reduction prevents disease in a mouse model of Dravet syndrome	Gheyara AL, Ponnusamy R, Djukic B, Craft RJ, Ho K, Guo W, Finucane MM, Sanchez PE, Mucke L.		Gheyara AL	Ann Neurol	2014	PMC4338764		10.1002/ana.24230
32126198	Tau Reduction Prevents Key Features of Autism in Mouse Models	Tai C, Chang CW, Yu GQ, Lopez I, Yu X, Wang X, Guo W, Mucke L.		Tai C	Neuron	2020	PMC7210056	NIHMS1568772	10.1016/j.neuron.2020.01.038
27582020	Temperature-dependent changes in neuronal dynamics in a patient with an SCN1A mutation and hyperthermia induced seizures	Peters C, Rosch RE, Hughes E, Ruben PC.		Peters C	Sci Rep	2016	PMC5007485		10.1038/srep31879
33851920	Temporal-parietal-occipital epilepsy in GEFS+ associated with SCN1A mutation	Riva A, Coppola A, Balagura G, Scala M, Iacomino M, Marchese F, Amadori E, Lattanzi S, Meo R, Striano S, Salpietro V, Zara F, Minetti C, Striano P, Bilo L.		Riva A	Epileptic Disord	2021			10.1684/epd.2021.1266
33099130	Testing broad-spectrum and isoform-preferring HCN channel blockers for anticonvulsant properties in mice	Kharouf Q, Pinares-Garcia P, Romanelli MN, Reid CA.		Kharouf Q	Epilepsy Res	2020			10.1016/j.eplepsyres.2020.106484
29929108	The adult motor phenotype of Dravet syndrome is associated with mutation of the STXBP1 gene and responds well to cannabidiol treatment	¨¢lvarez Bravo G, Yusta Izquierdo A.		¨¢lvarez Bravo G	Seizure	2018			10.1016/j.seizure.2018.06.010
28753467	The association of SCN1A p.Thr1067Ala polymorphism with epilepsy risk and the response to antiepileptic drugs in Slovenian children and adolescents with epilepsy	Bertok S, Dol?an V, Gori?ar K, Podkraj?ek KT, Battelino T, Rener-Primec Z.		Bertok S	Seizure	2017			10.1016/j.seizure.2017.07.007
24854149	The case for medical marijuana in epilepsy	Maa E, Figi P.		Maa E	Epilepsia	2014			10.1111/epi.12610
24709890	The challenges and innovations for therapy in children with epilepsy	Wilmshurst JM, Berg AT, Lagae L, Newton CR, Cross JH.		Wilmshurst JM	Nat Rev Neurol	2014	PMC6858858	EMS84914	10.1038/nrneurol.2014.58
31139143	The Clinical and Genetic Features of Co-occurring Epilepsy and Autism Spectrum Disorder in Chinese Children	Long S, Zhou H, Li S, Wang T, Ma Y, Li C, Zhou Y, Zhou S, Wu B, Wang Y.		Long S	Front Neurol	2019	PMC6527735		10.3389/fneur.2019.00505
18627414	The clinical impact of pharmacogenetics on the treatment of epilepsy	L?scher W, Klotz U, Zimprich F, Schmidt D.		L?scher W	Epilepsia	2009			10.1111/j.1528-1167.2008.01716.x
27527380	The clinical spectrum of female epilepsy patients with PCDH19 mutations in a Chinese population	Liu A, Xu X, Yang X, Jiang Y, Yang Z, Liu X, Wu Y, Wu X, Wei L, Zhang Y.		Liu A	Clin Genet	2017			10.1111/cge.12846
23163885	The clinical utility of an SCN1A genetic diagnosis in infantile-onset epilepsy	Brunklaus A, Dorris L, Ellis R, Reavey E, Lee E, Forbes G, Appleton R, Cross JH, Ferrie C, Hughes I, Jollands A, King MD, Livingston J, Lynch B, Philip S, Scheffer IE, Williams R, Zuberi SM.		Brunklaus A	Dev Med Child Neurol	2013			10.1111/dmcn.12030
30945278	The combination of whole-exome sequencing and copy number variation sequencing enables the diagnosis of rare neurological disorders	Jiao Q, Sun H, Zhang H, Wang R, Li S, Sun D, Yang XA, Jin Y.		Jiao Q	Clin Genet	2019			10.1111/cge.13548
29486580	The contribution of CACNA1A, ATP1A2 and SCN1A mutations in hemiplegic migraine: A clinical and genetic study in Finnish migraine families	Hiekkala ME, Vuola P, Artto V, H?pp?l? P, H?pp?l? E, Veps?l?inen S, Cuenca-Le¨®n E, Lal D, Gormley P, H?m?l?inen E, Ilmavirta M, Nissil? M, S?k? E, Sumelahti ML, Harno H, Havanka H, Keski-S?ntti P, F?rkkil? M, Palotie A, Wessman M, Kaunisto MA, Kallela M.		Hiekkala ME	Cephalalgia	2018			10.1177/0333102418761041
21463272	The core Dravet syndrome phenotype	Dravet C.		Dravet C	Epilepsia	2011			10.1111/j.1528-1167.2011.02994.x
21377452	The developmental changes of Na(v)1.1 and Na(v)1.2 expression in the human hippocampus and temporal lobe	Wang W, Takashima S, Segawa Y, Itoh M, Shi X, Hwang SK, Nabeshima K, Takeshita M, Hirose S.		Wang W	Brain Res	2011			10.1016/j.brainres.2011.02.083
33049783	The Direct Costs of Dravet's Syndrome before and after Diagnosis Assessment	?esk¨¢ K, ?esky L, O?lej?kov¨¢ H, Aulick¨¢ ?.		?esk¨¢ K	Neuropediatrics	2021			10.1055/s-0040-1718518
33411776	The dose makes the poison-Novel insights into Dravet syndrome and SCN1A regulation through nonproductive splicing	Helbig I, Goldberg E.		Helbig I	PLoS Genet	2021	PMC7790282		10.1371/journal.pgen.1009214
30142967	The Effect of Ca(2+), Lobe-Specificity, and CaMKII on CaM Binding to Na(V)1.1	Li J, Yu Z, Xu J, Feng R, Gao Q, Boczek T, Liu J, Li Z, Wang Q, Lei M, Gong J, Hu H, Minobe E, Ji HL, Kameyama M, Guo F.		Li J	Int J Mol Sci	2018	PMC6165294		10.3390/ijms19092495
30061856	The Efficacy of Ketogenic Diet for Specific Genetic Mutation in Developmental and Epileptic Encephalopathy	Ko A, Jung DE, Kim SH, Kang HC, Lee JS, Lee ST, Choi JR, Kim HD.		Ko A	Front Neurol	2018	PMC6054992		10.3389/fneur.2018.00530
31249551	The Efficacy of Ketogenic Diet in 60 Chinese Patients With Dravet Syndrome	Tian X, Chen J, Zhang J, Yang X, Ji T, Zhang Y, Wu Y, Fang F, Wu X, Zhang Y.		Tian X	Front Neurol	2019	PMC6584746		10.3389/fneur.2019.00625
25666511	The European patient with Dravet syndrome: results from a parent-reported survey on antiepileptic drug use in the European population with Dravet syndrome	Aras LM, Isla J, Mingorance-Le Meur A.		Aras LM	Epilepsy Behav	2015			10.1016/j.yebeh.2014.12.028
21533730	The genetic features of 24 patients affected by familial and sporadic hemiplegic migraine	Gallanti A, Cardin V, Tonelli A, Bussone G, Bresolin N, Mariani C, Bassi MT.		Gallanti A	Neurol Sci	2011			10.1007/s10072-011-0517-4
28479855	The genetic relationship between epilepsy and hemiplegic migraine	Huang Y, Xiao H, Qin X, Nong Y, Zou D, Wu Y.		Huang Y	Neuropsychiatr Dis Treat	2017	PMC5411172		10.2147/NDT.S132451
17142831	The genetic spectrum of a population-based sample of familial hemiplegic migraine	Thomsen LL, Kirchmann M, Bjornsson A, Stefansson H, Jensen RM, Fasquel AC, Petursson H, Stefansson M, Frigge ML, Kong A, Gulcher J, Stefansson K, Olesen J.		Thomsen LL	Brain	2007			10.1093/brain/awl334
27473590	The genetic variants in 3' untranslated region of voltage-gated sodium channel alpha 1 subunit gene affect the mRNA-microRNA interactions and associate with epilepsy	Li T, Kuang Y, Li B.		Li T	BMC Genet	2016	PMC4966731		10.1186/s12863-016-0417-y
21463275	The genetics of Dravet syndrome	Marini C, Scheffer IE, Nabbout R, Suls A, De Jonghe P, Zara F, Guerrini R.		Marini C	Epilepsia	2011			10.1111/j.1528-1167.2011.02997.x
32184723	The Glucagon-Like Peptide-1 Analogue Liraglutide Reduces Seizures Susceptibility, Cognition Dysfunction and Neuronal Apoptosis in a Mouse Model of Dravet Syndrome	Liu S, Jin Z, Zhang Y, Rong S, He W, Sun K, Wan D, Huo J, Xiao L, Li X, Ding N, Wang F, Sun T.		Liu S	Front Pharmacol	2020	PMC7059191		10.3389/fphar.2020.00136
34079465	The Heat Sensing Trpv1 Receptor Is Not a Viable Anticonvulsant Drug Target in the Scn1a (+/-) Mouse Model of Dravet Syndrome	Satpute Janve V, Anderson LL, Bahceci D, Hawkins NA, Kearney JA, Arnold JC.		Satpute Janve V	Front Pharmacol	2021	PMC8165383		10.3389/fphar.2021.675128
25778844	The incidence of SCN1A-related Dravet syndrome in Denmark is 1:22,000: a population-based study from 2004 to 2009	Bayat A, Hjalgrim H, M?ller RS.		Bayat A	Epilepsia	2015			10.1111/epi.12927
26354167	The ketogenic diet in infants--Advantages of early use	Dressler A, Trimmel-Schwahofer P, Reithofer E, Gr?ppel G, M¨¹hlebner A, Samueli S, Grabner V, Abraham K, Benninger F, Feucht M.		Dressler A	Epilepsy Res	2015			10.1016/j.eplepsyres.2015.06.015
12742596	The lack of association between febrile convulsions and polymorphisms in SCN1A	Chou IC, Peng CT, Tsai FJ, Huang CC, Shi YR, Tsai CH.		Chou IC	Epilepsy Res	2003			10.1016/s0920-1211(03)00043-3
31256750	The lack of influence of IVS5-91 G>A polymorphism of the SCN1A gene on efficacy of lamotrigine in patients with focal epilepsy	Markovic I, Pejanovic-Skobic N, Bozina N, Susak Sporis I, Sporis D, Basic S.		Markovic I	Neurol Res	2019			10.1080/01616412.2019.1635321
33721710	The MinION as a cost-effective technology for diagnostic screening of the SCN1A gene in epilepsy patients	Ngo TTD, Lea RA, Maksemous N, Eccles DA, Smith RA, Dunn PJ, Thao VC, Ha TMT, B¨´i CB, Haupt LM, Scott R, Griffiths LR.		Ngo TTD	Epilepsy Res	2021			10.1016/j.eplepsyres.2021.106593
24328832	The multiple faces of Dravet syndrome	Andrade DM.		Andrade DM	Dev Med Child Neurol	2014			10.1111/dmcn.12332
26150927	The Nav channel bench series: Plasmid preparation	Feldman DH, Lossin C.		Feldman DH	MethodsX	2014	PMC4472833		10.1016/j.mex.2014.01.002
17397047	The novel p.L1649Q mutation in the SCN1A epilepsy gene is associated with familial hemiplegic migraine: genetic and functional studies. Mutation in brief #957. Online	Vanmolkot KR, Babini E, de Vries B, Stam AH, Freilinger T, Terwindt GM, Norris L, Haan J, Frants RR, Ramadan NM, Ferrari MD, Pusch M, van den Maagdenberg AM, Dichgans M.		Vanmolkot KR	Hum Mutat	2007			10.1002/humu.9486
33410528	The phenotypic spectrum of X-linked, infantile onset ALG13-related developmental and epileptic encephalopathy	Datta AN, Bahi-Buisson N, Bienvenu T, Buerki SE, Gardiner F, Cross JH, Heron B, Kaminska A, Korff CM, Lepine A, Lesca G, McTague A, Mefford HC, Mignot C, Milh M, Piton A, Pressler RM, Ruf S, Sadleir LG, de Saint Martin A, Van Gassen K, Verbeek NE, Ville D, Villeneuve N, Zacher P, Scheffer IE, Lemke JR.		Datta AN	Epilepsia	2021	PMC7898319		10.1111/epi.16761
30538486	The possible effect of SCN1A and SCN2A genetic variants on carbamazepine response among Khyber Pakhtunkhwa epileptic patients, Pakistan	Nazish HR, Ali N, Ullah S.		Nazish HR	Ther Clin Risk Manag	2018	PMC6254658		10.2147/TCRM.S180827
27498208	The potential implication of SCN1A and CYP3A5 genetic variants on antiepileptic drug resistance among Egyptian epileptic children	Abo El Fotoh WM, Abd El Naby SA, Habib MS, ALrefai AA, Kasemy ZA.		Abo El Fotoh WM	Seizure	2016			10.1016/j.seizure.2016.07.005
30431232	The Role of Protocadherin 19 (PCDH19) in Neurodevelopment and in the Pathophysiology of Early Infantile Epileptic Encephalopathy-9 (EIEE9)	Gerosa L, Francolini M, Bassani S, Passafaro M.		Gerosa L	Dev Neurobiol	2019			10.1002/dneu.22654
32449611	The role of sodium channels in sudden unexpected death in pediatrics	Rochtus AM, Goldstein RD, Holm IA, Brownstein CA, P¨¦rez-Palma E, Haynes R, Lal D, Poduri AH.		Rochtus AM	Mol Genet Genomic Med	2020	PMC7434613		10.1002/mgg3.1309
23884151	The SCN1A gene variants and epileptic encephalopathies	Parihar R, Ganesh S.		Parihar R	J Hum Genet	2013			10.1038/jhg.2013.77
25754450	The SCN1A mutation database: updating information and analysis of the relationships among genotype, functional alteration, and phenotype	Meng H, Xu HQ, Yu L, Lin GW, He N, Su T, Shi YW, Li B, Wang J, Liu XR, Tang B, Long YS, Yi YH, Liao WP.		Meng H	Hum Mutat	2015			10.1002/humu.22782
19585586	The SCN1A variant database: a novel research and diagnostic tool	Claes LR, Deprez L, Suls A, Baets J, Smets K, Van Dyck T, Deconinck T, Jordanova A, De Jonghe P.		Claes LR	Hum Mutat	2009			10.1002/humu.21083
12835116	The sodium channel blocker RS100642 reverses down-regulation of the sodium channel alpha-subunit Na(v) 1.1 expression caused by transient ischemic brain injury in rats	Yao C, Williams AJ, Lu XC, Price RA, Cunningham BS, Berti R, Tortella FC, Dave JR.		Yao C	Neurotox Res	2003			10.1007/BF03033382
17347258	The spectrum of SCN1A-related infantile epileptic encephalopathies	Harkin LA, McMahon JM, Iona X, Dibbens L, Pelekanos JT, Zuberi SM, Sadleir LG, Andermann E, Gill D, Farrell K, Connolly M, Stanley T, Harbord M, Andermann F, Wang J, Batish SD, Jones JG, Seltzer WK, Gardner A; Infantile Epileptic Encephalopathy Referral Consortium, Sutherland G, Berkovic SF, Mulley JC, Scheffer IE.		Harkin LA	Brain	2007			10.1093/brain/awm002
29127345	The synthetic neuroactive steroid SGE-516 reduces seizure burden and improves survival in a Dravet syndrome mouse model	Hawkins NA, Lewis M, Hammond RS, Doherty JJ, Kearney JA.		Hawkins NA	Sci Rep	2017	PMC5681541		10.1038/s41598-017-15609-w
31022638	The therapeutic effect of stiripentol in Gabrg2(+/Q390X) mice associated with epileptic encephalopathy	Warner TA, Smith NK, Kang JQ.		Warner TA	Epilepsy Res	2019	PMC6691973	NIHMS1527595	10.1016/j.eplepsyres.2019.04.006
28709814	The therapeutic implication of a novel SCN2A mutation associated early-onset epileptic encephalopathy with Rett-like features	Liang JS, Lin LJ, Yang MT, Wang JS, Lu JF.		Liang JS	Brain Dev	2017			10.1016/j.braindev.2017.06.003
32114117	The voltage-gated sodium channel inhibitor, 4,9-anhydrotetrodotoxin, blocks human Na(v)1.1 in addition to Na(v)1.6	Denomme N, Lukowski AL, Hull JM, Jameson MB, Bouza AA, Narayan ARH, Isom LL.		Denomme N	Neurosci Lett	2020	PMC7096269	NIHMS1575399	10.1016/j.neulet.2020.134853
17881658	The voltage-gated sodium channel Scn8a is a genetic modifier of severe myoclonic epilepsy of infancy	Martin MS, Tang B, Papale LA, Yu FH, Catterall WA, Escayg A.		Martin MS	Hum Mol Genet	2007			10.1093/hmg/ddm248
15041696	Theoretical investigation of the neuronal Na+ channel SCN1A: abnormal gating and epilepsy	Clancy CE, Kass RS.		Clancy CE	Biophys J	2004	PMC1304107		10.1016/S0006-3495(04)74315-5
23667778	Therapeutic hypothermia for refractory status epilepticus in a child with malignant migrating partial seizures of infancy and SCN1A mutation: a case report	Shein SL, Reynolds TQ, Gedela S, Kochanek PM, Bell MJ.		Shein SL	Ther Hypothermia Temp Manag	2012	PMC3621620		10.1089/ther.2012.0013
24439681	Therapeutic potential of Na(V)1.1 activators	Jensen HS, Grunnet M, Bastlund JF.		Jensen HS	Trends Pharmacol Sci	2014			10.1016/j.tips.2013.12.007
21480876	Therapy for hyperthermia-induced seizures in Scn1a mutant rats	Hayashi K, Ueshima S, Ouchida M, Mashimo T, Nishiki T, Sendo T, Serikawa T, Matsui H, Ohmori I.		Hayashi K	Epilepsia	2011			10.1111/j.1528-1167.2011.03046.x
22140129	Thoracic myelopathy secondary to seizure following scoliosis surgery	Myers KA, Payne ET, Esser MJ, Kirton A, Howard JJ.		Myers KA	J Child Neurol	2012			10.1177/0883073811426933
1679748	Three brain sodium channel alpha-subunit genes are clustered on the proximal segment of mouse chromosome 2	Malo D, Schurr E, Dorfman J, Canfield V, Levenson R, Gros P.		Malo D	Genomics	1991			10.1016/0888-7543(91)90450-s
25843248	Three patients manifesting early infantile epileptic spasms associated with 2q24.3 microduplications	Yoshitomi S, Takahashi Y, Ishizuka M, Yamaguchi T, Watanabe A, Nasu H, Ueda Y, Ohtani H, Ikeda H, Imai K, Shigematsu H, Inoue Y, Tanahashi Y, Aiba K, Ohta H, Shimada S, Yamamoto T.		Yoshitomi S	Brain Dev	2015			10.1016/j.braindev.2015.03.001
32146541	Tiered analysis of whole-exome sequencing for epilepsy diagnosis	Dunn PJ, Maher BH, Albury CL, Stuart S, Sutherland HG, Maksemous N, Benton MC, Smith RA, Haupt LM, Griffiths LR.		Dunn PJ	Mol Genet Genomics	2020			10.1007/s00438-020-01657-x
30984098	Time of Day and a Ketogenic Diet Influence Susceptibility to SUDEP in Scn1a (R1407X/+) Mice	Teran FA, Kim Y, Crotts MS, Bravo E, Emaus KJ, Richerson GB.		Teran FA	Front Neurol	2019	PMC6449461		10.3389/fneur.2019.00278
20879882	Timing of de novo mutagenesis--a twin study of sodium-channel mutations	Vadlamudi L, Dibbens LM, Lawrence KM, Iona X, McMahon JM, Murrell W, Mackay-Sim A, Scheffer IE, Berkovic SF.		Vadlamudi L	N Engl J Med	2010			10.1056/NEJMoa0910752
PMID	Title	Authors		First Author	Journal/Book	Publication Year	PMCID	NIHMS ID	DOI
28735770	To4, the first Tityus obscurus ¦Â-toxin fully electrophysiologically characterized on human sodium channel isoforms	Duque HM, Mour?o CBF, Tibery DV, Barbosa EA, Campos LA, Schwartz EF.		Duque HM	Peptides	2017			10.1016/j.peptides.2017.07.010
23885228	Towards identification of individual etiologies by resolving genomic and biological conundrums in patients with autism spectrum disorders	Poot M.		Poot M	Mol Syndromol	2013	PMC3711481		10.1159/000350041
24436055	Transcription of the human sodium channel SCN1A gene is repressed by a scaffolding protein RACK1	Dong ZF, Tang LJ, Deng GF, Zeng T, Liu SJ, Wan RP, Liu T, Zhao QH, Yi YH, Liao WP, Long YS.		Dong ZF	Mol Neurobiol	2014			10.1007/s12035-014-8633-9
17964804	Transcriptional and functional profiles of voltage-gated Na(+) channels in injured and non-injured DRG neurons in the SNI model of neuropathic pain	Berta T, Poirot O, Pertin M, Ji RR, Kellenberger S, Decosterd I.		Berta T	Mol Cell Neurosci	2008			10.1016/j.mcn.2007.09.007
31445158	Transcriptomes of Dravet syndrome iPSC derived GABAergic cells reveal dysregulated pathways for chromatin remodeling and neurodevelopment	Schuster J, Laan L, Klar J, Jin Z, Huss M, Korol S, Noraddin FH, Sobol M, Birnir B, Dahl N.		Schuster J	Neurobiol Dis	2019			10.1016/j.nbd.2019.104583
29069078	Transcriptomic correlates of neuron electrophysiological diversity	Tripathy SJ, Toker L, Li B, Crichlow CL, Tebaykin D, Mancarci BO, Pavlidis P.		Tripathy SJ	PLoS Comput Biol	2017	PMC5673240		10.1371/journal.pcbi.1005814
34589280	Transfer of SCN1A to the brain of adolescent mouse model of Dravet syndrome improves epileptic, motor, and behavioral manifestations	Mora-Jimenez L, Valencia M, Sanchez-Carpintero R, T?nnesen J, Fadila S, Rubinstein M, Gonzalez-Aparicio M, Bunuales M, Fernandez-Pierola E, Nicolas MJ, Puerta E, Miguelez C, Minguez PG, Lumbreras S, Gonzalez-Aseguinolaza G, Ricobaraza A, Hernandez-Alcoceba R.		Mora-Jimenez L	Mol Ther Nucleic Acids	2021	PMC8463324		10.1016/j.omtn.2021.08.003
19139296	Translational research in epilepsy genetics: sodium channels in man to interneuronopathy in mouse	Mullen SA, Scheffer IE.		Mullen SA	Arch Neurol	2009			10.1001/archneurol.2008.559
24055687	True but not false memories are associated with the HTR2A gene	Zhu B, Chen C, Loftus EF, Moyzis RK, Dong Q, Lin C.		Zhu B	Neurobiol Learn Mem	2013			10.1016/j.nlm.2013.09.004
31677916	Two autopsy cases of sudden unexpected death from Dravet syndrome with novel de novo SCN1A variants	Hata Y, Oku Y, Taneichi H, Tanaka T, Igarashi N, Niida Y, Nishida N.		Hata Y	Brain Dev	2020			10.1016/j.braindev.2019.10.005
18251839	Two cases of sudden unexpected death in epilepsy in a GEFS+ family with an SCN1A mutation	Hindocha N, Nashef L, Elmslie F, Birch R, Zuberi S, Al-Chalabi A, Crotti L, Schwartz PJ, Makoff A.		Hindocha N	Epilepsia	2008			10.1111/j.1528-1167.2007.01439_2.x
21204806	Two distinct regions in 2q24.2-q24.3 associated with idiopathic epilepsy	Krepischi AC, Knijnenburg J, Bertola DR, Kim CA, Pearson PL, Bijlsma E, Szuhai K, Kok F, Vianna-Morgante AM, Rosenberg C.		Krepischi AC	Epilepsia	2010			10.1111/j.1528-1167.2010.02742.x
27544716	Two mild cases of Dravet syndrome with truncating mutation of SCN1A	Takaori T, Kumakura A, Ishii A, Hirose S, Hata D.		Takaori T	Brain Dev	2017			10.1016/j.braindev.2016.07.006
29145747	Two novel families with hemiplegic migraine caused by recurrent SCN1A mutation p.F1499L	Schubert V, Auffenberg E, Biskup S, Jurkat-Rott K, Freilinger T.		Schubert V	Cephalalgia	2018			10.1177/0333102417742365
20682179	Two novel mutations in SCN1A gene in Iranian patients with epilepsy	Ebrahimi A, Houshmand M, Tonekaboni SH, Fallah Mahboob Passand MS, Zainali S, Moghadasi M.		Ebrahimi A	Arch Med Res	2010			10.1016/j.arcmed.2010.04.007
12919402	Two novel SCN1A missense mutations in generalized epilepsy with febrile seizures plus	Annesi G, Gambardella A, Carrideo S, Incorpora G, Labate A, Pasqua AA, Civitelli D, Polizzi A, Annesi F, Spadafora P, Tarantino P, Cir¨° Candiano IC, Romeo N, De Marco EV, Ventura P, LePiane E, Zappia M, Aguglia U, Pavone L, Quattrone A.		Annesi G	Epilepsia	2003			10.1046/j.1528-1157.2003.22503.x
24707016	Two novel SCN1A mutations identified in families with familial hemiplegic migraine	Weller CM, Pelzer N, de Vries B, L¨®pez MA, De F¨¤bregues O, Pascual J, Arroyo MA, Koelewijn SC, Stam AH, Haan J, Ferrari MD, Terwindt GM, van den Maagdenberg AM.		Weller CM	Cephalalgia	2014			10.1177/0333102414529195
33676317	Two-photon calcium imaging of seizures in awake, head-fixed mice	Somarowthu A, Goff KM, Goldberg EM.		Somarowthu A	Cell Calcium	2021	PMC8187286	NIHMS1679646	10.1016/j.ceca.2021.102380
26819275	Unaltered Network Activity and Interneuronal Firing During Spontaneous Cortical Dynamics In Vivo in a Mouse Model of Severe Myoclonic Epilepsy of Infancy	De Stasi AM, Farisello P, Marcon I, Cavallari S, Forli A, Vecchia D, Losi G, Mantegazza M, Panzeri S, Carmignoto G, Bacci A, Fellin T.		De Stasi AM	Cereb Cortex	2016	PMC4785957		10.1093/cercor/bhw002
33876820	UNC13B variants associated with partial epilepsy with favourable outcome	Wang J, Qiao JD, Liu XR, Liu DT, Chen YH, Wu Y, Sun Y, Yu J, Ren RN, Mei Z, Liu YX, Shi YW, Jiang M, Lin SM, He N, Li B, Bian WJ, Li BM, Yi YH, Su T, Liu HK, Gu WY, Liao WP; China Epilepsy Gene 1.0 Project.		Wang J	Brain	2021			10.1093/brain/awab164
27781027	Understanding Genotypes and Phenotypes in Epileptic Encephalopathies	Helbig I, Tayoun AA.		Helbig I	Mol Syndromol	2016	PMC5073622		10.1159/000448530
28490751	Unexpected Efficacy of a Novel Sodium Channel Modulator in Dravet Syndrome	Anderson LL, Hawkins NA, Thompson CH, Kearney JA, George AL Jr.		Anderson LL	Sci Rep	2017	PMC5431801		10.1038/s41598-017-01851-9
28387369	Unexplained Early Infantile Epileptic Encephalopathy in Han Chinese Children: Next-Generation Sequencing and Phenotype Enriching	Arafat A, Jing P, Ma Y, Pu M, Nan G, Fang H, Chen C, Fei Y.		Arafat A	Sci Rep	2017	PMC5384237		10.1038/srep46227
26648591	Unexplained early onset epileptic encephalopathy: Exome screening and phenotype expansion	Allen NM, Conroy J, Shahwan A, Lynch B, Correa RG, Pena SD, McCreary D, Magalh?es TR, Ennis S, Lynch SA, King MD.		Allen NM	Epilepsia	2016			10.1111/epi.13250
24872787	Untangling the dravet syndrome seizure network: the changing face of a rare genetic epilepsy	Chopra R, Isom LL.		Chopra R	Epilepsy Curr	2014	PMC4010885		10.5698/1535-7597-14.2.86
20172746	Unusual consequences of status epilepticus in Dravet syndrome	Chipaux M, Villeneuve N, Sabouraud P, Desguerre I, Boddaert N, Depienne C, Chiron C, Dulac O, Nabbout R.		Chipaux M	Seizure	2010			10.1016/j.seizure.2010.01.007
25525853	Upregulated genes at 2q24 gains as candidate oncogenes in hepatoblastomas	Rodrigues TC, Fidalgo F, da Costa CM, Ferreira EN, da Cunha IW, Carraro DM, Krepischi AC, Rosenberg C.		Rodrigues TC	Future Oncol	2014			10.2217/fon.14.149
27333023	Upregulation of Haploinsufficient Gene Expression in the Brain by Targeting a Long Non-coding RNA Improves Seizure Phenotype in a Model of Dravet Syndrome	Hsiao J, Yuan TY, Tsai MS, Lu CY, Lin YC, Lee ML, Lin SW, Chang FC, Liu Pimentel H, Olive C, Coito C, Shen G, Young M, Thorne T, Lawrence M, Magistri M, Faghihi MA, Khorkova O, Wahlestedt C.		Hsiao J	EBioMedicine	2016	PMC4972487		10.1016/j.ebiom.2016.05.011
30977854	Use of a Dynamic Genetic Testing Approach for Childhood-Onset Epilepsy	Balciuniene J, DeChene ET, Akgumus G, Romasko EJ, Cao K, Dubbs HA, Mulchandani S, Spinner NB, Conlin LK, Marsh ED, Goldberg E, Helbig I, Sarmady M, Abou Tayoun A.		Balciuniene J	JAMA Netw Open	2019	PMC6481455		10.1001/jamanetworkopen.2019.2129
32427350	Utility of genetic testing for therapeutic decision-making in adults with epilepsy	Johannesen KM, Nikanorova N, Marjanovic D, Pavbro A, Larsen LHG, Rubboli G, M?ller RS.		Johannesen KM	Epilepsia	2020			10.1111/epi.16533
24405698	Vaccination and occurrence of seizures in SCN1A mutation-positive patients: a multicenter Italian study	Zamponi N, Passamonti C, Petrelli C, Veggiotti P, Baldassari C, Verrotti A, Capovilla G, Viri M, Coppola G, Vignoli A.		Zamponi N	Pediatr Neurol	2014			10.1016/j.pediatrneurol.2013.09.016
32193085	Vaccination management in an asymptomatic child with a novel SCN1A variant and family history of status epilepticus following vaccination: A case report on a potential new direction in personalised medicine	Deng L, Ma A, Wood N, Ardern-Holmes S.		Deng L	Seizure	2020			10.1016/j.seizure.2020.03.005
19952750	Vaccine safety: current systems and recent findings	Wharton M.		Wharton M	Curr Opin Pediatr	2010			10.1097/MOP.0b013e3283350425
28070485	Vagus nerve stimulation for genetic epilepsy with febrile seizures plus (GEFS(+)) accompanying seizures with impaired consciousness	Hanaya R, Niantiarno FH, Kashida Y, Hosoyama H, Maruyama S, Otsubo T, Tanaka K, Ishii A, Hirose S, Arita K.		Hanaya R	Epilepsy Behav Case Rep	2016	PMC5219608		10.1016/j.ebcr.2016.11.001
28079431	Vagus Nerve Stimulation in Intractable Epilepsy Associated With SCN1A Gene Abnormalities	Fulton SP, Van Poppel K, McGregor AL, Mudigoudar B, Wheless JW.		Fulton SP	J Child Neurol	2017			10.1177/0883073816687221
23398550	Variability of EEG-fMRI findings in patients with SCN1A-positive Dravet syndrome	Moehring J, von Spiczak S, Moeller F, Helbig I, Wolff S, Jansen O, Muhle H, Boor R, Stephani U, Siniatchkin M.		Moehring J	Epilepsia	2013			10.1111/epi.12119
21204810	Variable epilepsy phenotypes associated with a familial intragenic deletion of the SCN1A gene	Guerrini R, Cellini E, Mei D, Metitieri T, Petrelli C, Pucatti D, Marini C, Zamponi N.		Guerrini R	Epilepsia	2010			10.1111/j.1528-1167.2010.02790.x
29500686	Variable epilepsy phenotypes associated with heterozygous mutation in the SCN9A gene: report of two cases	Yang C, Hua Y, Zhang W, Xu J, Xu L, Gao F, Jiang P.		Yang C	Neurol Sci	2018			10.1007/s10072-018-3300-y
21775168	Variable expressivity of a novel mutation in the SCN1A gene leading to an autosomal dominant seizure disorder	Mhanni AA, Hartley JN, Sanger WG, Chudley AE, Spriggs EL.		Mhanni AA	Seizure	2011			10.1016/j.seizure.2011.06.014
19464195	Variable neurologic phenotype in a GEFS+ family with a novel mutation in SCN1A	Mahoney K, Moore SJ, Buckley D, Alam M, Parfrey P, Penney S, Merner N, Hodgkinson K, Young TL.		Mahoney K	Seizure	2009			10.1016/j.seizure.2009.04.009
32845893	Variable patterns of mutation density among NaV1.1, NaV1.2 and NaV1.6 point to channel-specific functional differences associated with childhood epilepsy	Encinas AC, Watkins JC, Longoria IA, Johnson JP Jr, Hammer MF.		Encinas AC	PLoS One	2020	PMC7449494		10.1371/journal.pone.0238121
31282864	Vasoactive intestinal peptide-expressing interneurons are impaired in a mouse model of Dravet syndrome	Goff KM, Goldberg EM.		Goff KM	Elife	2019	PMC6629374		10.7554/eLife.46846
32259093	Venom Peptides with Dual Modulatory Activity on the Voltage-Gated Sodium Channel Na(V)1.1 Provide Novel Leads for Development of Antiepileptic Drugs	Chow CY, Chin YK, Walker AA, Guo S, Blomster LV, Ward MJ, Herzig V, Rokyta DR, King GF.		Chow CY	ACS Pharmacol Transl Sci	2019	PMC7088997		10.1021/acsptsci.9b00079
32807948	Viral manipulation of functionally distinct interneurons in mice, non-human primates and humans	Vormstein-Schneider D, Lin JD, Pelkey KA, Chittajallu R, Guo B, Arias-Garcia MA, Allaway K, Sakopoulos S, Schneider G, Stevenson O, Vergara J, Sharma J, Zhang Q, Franken TP, Smith J, Ibrahim LA, M Astro KJ, Sabri E, Huang S, Favuzzi E, Burbridge T, Xu Q, Guo L, Vogel I, Sanchez V, Saldi GA, Gorissen BL, Yuan X, Zaghloul KA, Devinsky O, Sabatini BL, Batista-Brito R, Reynolds J, Feng G, Fu Z, McBai…		Vormstein-Schneider D	Nat Neurosci	2020	PMC8015416	NIHMS1682740	10.1038/s41593-020-0692-9
33841294	Voltage Gated Sodium Channel Genes in Epilepsy: Mutations, Functional Studies, and Treatment Dimensions	Ademuwagun IA, Rotimi SO, Syrbe S, Ajamma YU, Adebiyi E.		Ademuwagun IA	Front Neurol	2021	PMC8024648		10.3389/fneur.2021.600050
18021327	Voltage-dependent Na(v)1.7 sodium channels: multiple roles in adrenal chromaffin cells and peripheral nervous system	Wada A, Wanke E, Gullo F, Schiavon E.		Wada A	Acta Physiol (Oxf)	2008			10.1111/j.1748-1716.2007.01810.x
18079688	Voltage-gated sodium channel alpha-subunits Na(v)1.1, Na(v)1.2, and Na(v)1.6 in the distal mammalian retina	Mojumder DK, Frishman LJ, Otteson DC, Sherry DM.		Mojumder DK	Mol Vis	2007
19765660	Voltage-gated sodium channel expression in rat spiral ganglion neurons	Fryatt AG, Vial C, Mulheran M, Gunthorpe MJ, Grubb BD.		Fryatt AG	Mol Cell Neurosci	2009			10.1016/j.mcn.2009.09.001
18158113	Voltage-gated sodium channel Nav1.1, Nav1.3 and beta1 subunit were up-regulated in the hippocampus of spontaneously epileptic rat	Guo F, Yu N, Cai JQ, Quinn T, Zong ZH, Zeng YJ, Hao LY.		Guo F	Brain Res Bull	2008			10.1016/j.brainresbull.2007.10.005
27815510	Voltage-gated sodium channels and pain-related disorders	Kanellopoulos AH, Matsuyama A.		Kanellopoulos AH	Clin Sci (Lond)	2016			10.1042/CS20160041
30817475	What is the role of cannabidiol in refractory epilepsy?	LaFleur KM, Nemec EC 2nd.		LaFleur KM	JAAPA	2019			10.1097/01.JAA.0000553393.36249.df
24679980	When is a child with status epilepticus likely to have Dravet syndrome?	Le Gal F, Lebon S, Ramelli GP, Datta AN, Mercati D, Maier O, Combescure C, Rodriguez MI, Seeck M, Roulet E, Korff CM.		Le Gal F	Epilepsy Res	2014			10.1016/j.eplepsyres.2014.02.019
22000312	When should clinicians order genetic testing for Dravet syndrome?	Fountain-Capal JK, Holland KD, Gilbert DL, Hallinan BE.		Fountain-Capal JK	Pediatr Neurol	2011	PMC3520060	NIHMS423626	10.1016/j.pediatrneurol.2011.08.001
31720899	Whole exome sequencing identifies a novel SCN1A mutation in genetic (idiopathic) generalized epilepsy and juvenile myoclonic epilepsy subtypes	Chan CK, Low JS, Lim KS, Low SK, Tan CT, Ng CC.		Chan CK	Neurol Sci	2020			10.1007/s10072-019-04122-9
26995749	¦Â1-Adrenergic blocker bisoprolol reverses down-regulated ion channels in sinoatrial node of heart failure rats	Du Y, Zhang J, Xi Y, Wu G, Han K, Huang X, Ma A, Wang T.		Du Y	J Physiol Biochem	2016			10.1007/s13105-016-0481-9
