# Supplementary material for: SCN1A Mutation—Beyond Dravet Syndrome: A Systematic Review and Narrative Synthesis
Source: Front Neurol. 2021 Dec 24;12:743726. doi: 10.3389/fneur.2021.743726 (PMC8739186; doi:10.3389/fneur.2021.743726)
Supplement: Supplementary file 1 [file Data_Sheet_1.ZIP › ╬─╧╫╝∞╦≈/Scopus (1500).csv]

PubMed ID	标题	年份	作者	来源出版物名称	卷	期	论文编号	起始页码	结束页码	页码计数	施引文献	DOI	链接		文献类型	出版阶段	开放获取	来源出版物	EID
34411648	ABCB1 c.3435C > T and EPHX1 c.416A > G polymorphisms influence plasma carbamazepine concentration, metabolism, and pharmacoresistance in epileptic patients	2021	Zhang M.-L., Chen X.-L., Bai Z.-F., Zhao X., Li W.-X., Wang X.-Y., Zhang H., Chen X.-F., Zhang S.-Q., Tang J.-F., Xiao X.-H., Zhao Y.-L.	Gene	805		145907					10.1016/j.gene.2021.145907	https://www.scopus.com/inward/record.uri?eid=2-s2.0-85114772346&doi=10.1016%2fj.gene.2021.145907&partnerID=40&md5=e708c9aaf391e28364727969c2f9e334		Article	Final	All Open Access, Green	Scopus	2-s2.0-85114772346
	Clinical next generation sequencing in developmental and epileptic encephalopathies: Diagnostic relevance of data re-analysis and variants re-interpretation	2021	Salinas V., Martínez N., Maturo J.P., Rodriguez-Quiroga S.A., Zavala L., Medina N., Amartino H., Sfaello I., Agosta G., Serafín E.M., Morón D.G., Kauffman M.A., Vega P.	European Journal of Medical Genetics	64	12	104363					10.1016/j.ejmg.2021.104363	https://www.scopus.com/inward/record.uri?eid=2-s2.0-85117367880&doi=10.1016%2fj.ejmg.2021.104363&partnerID=40&md5=359abe109a6c6cbf0fea5ced1e056881		Article	Final		Scopus	2-s2.0-85117367880
34556045	Response to Sodium Channel blocking Antiseizure medications and coding polymorphisms of Sodium Channel genes in Taiwanese epilepsy patients	2021	Lin C.-H., Ho C.-J., Lu Y.-T., Tsai M.-H.	BMC Neurology	21	1	367					10.1186/s12883-021-02395-2	https://www.scopus.com/inward/record.uri?eid=2-s2.0-85115330680&doi=10.1186%2fs12883-021-02395-2&partnerID=40&md5=91c1df37500a0d5a9bce3e4ba43891d3		Article	Final	All Open Access, Gold, Green	Scopus	2-s2.0-85115330680
34425903	Developmental dynamics of voltage-gated sodium channel isoform expression in the human and mouse brain	2021	Liang L., Fazel Darbandi S., Pochareddy S., Gulden F.O., Gilson M.C., Sheppard B.K., Sahagun A., An J.-Y., Werling D.M., Rubenstein J.L.R., Sestan N., Bender K.J., Sanders S.J.	Genome Medicine	13	1	135					10.1186/s13073-021-00949-0	https://www.scopus.com/inward/record.uri?eid=2-s2.0-85113792472&doi=10.1186%2fs13073-021-00949-0&partnerID=40&md5=5a8d6da181d87d3db29bcf55894dd64d		Article	Final	All Open Access, Gold, Green	Scopus	2-s2.0-85113792472
34348663	Genome-wide CNV investigation suggests a role for cadherin, Wnt, and p53 pathways in primary open-angle glaucoma	2021	Lo Faro V., ten Brink J.B., Snieder H., Jansonius N.M., Bergen A.A.	BMC Genomics	22	1	590					10.1186/s12864-021-07846-1	https://www.scopus.com/inward/record.uri?eid=2-s2.0-85111958206&doi=10.1186%2fs12864-021-07846-1&partnerID=40&md5=f26e4dde54a3b8149035f3e9cb3cd4dc		Article	Final	All Open Access, Gold, Green	Scopus	2-s2.0-85111958206
34320921	CACNA1A-p.Thr501Met mutation associated with familial hemiplegic migraine: a family report	2021	Romozzi M., Primiano G., Rollo E., Travaglini L., Calabresi P., Servidei S., Vollono C.	Journal of Headache and Pain	22	1	85					10.1186/s10194-021-01297-5	https://www.scopus.com/inward/record.uri?eid=2-s2.0-85111646132&doi=10.1186%2fs10194-021-01297-5&partnerID=40&md5=f54aced68e5fefea21de4c461071b218		Article	Final	All Open Access, Gold, Green	Scopus	2-s2.0-85111646132
34083748	Phenotypic analysis of catastrophic childhood epilepsy genes	2021	Griffin A., Carpenter C., Liu J., Paterno R., Grone B., Hamling K., Moog M., Dinday M.T., Figueroa F., Anvar M., Ononuju C., Qu T., Baraban S.C.	Communications Biology	4	1	680				1	10.1038/s42003-021-02221-y	https://www.scopus.com/inward/record.uri?eid=2-s2.0-85107174645&doi=10.1038%2fs42003-021-02221-y&partnerID=40&md5=4e546dd7e16e77e8538131035b67dc2f		Article	Final	All Open Access, Gold, Green	Scopus	2-s2.0-85107174645
34017040	Inhibitory synaptic transmission is impaired at higher extracellular Ca2+ concentrations in Scn1a +/− mouse model of Dravet syndrome	2021	Uchino K., Kawano H., Tanaka Y., Adaniya Y., Asahara A., Deshimaru M., Kubota K., Watanabe T., Katsurabayashi S., Iwasaki K., Hirose S.	Scientific Reports	11	1	10634					10.1038/s41598-021-90224-4	https://www.scopus.com/inward/record.uri?eid=2-s2.0-85106238527&doi=10.1038%2fs41598-021-90224-4&partnerID=40&md5=2a86d6969e335ee5647c3a72fc23516e		Article	Final	All Open Access, Gold, Green	Scopus	2-s2.0-85106238527
33910599	Deletion of a non-canonical regulatory sequence causes loss of Scn1a expression and epileptic phenotypes in mice	2021	Haigh J.L., Adhikari A., Copping N.A., Stradleigh T., Wade A.A., Catta-Preta R., Su-Feher L., Zdilar I., Morse S., Fenton T.A., Nguyen A., Quintero D., Agezew S., Sramek M., Kreun E.J., Carter J., Gompers A., Lambert J.T., Canales C.P., Pennacchio L.A., Visel A., Dickel D.E., Silverman J.L., Nord A.S.	Genome Medicine	13	1	69				2	10.1186/s13073-021-00884-0	https://www.scopus.com/inward/record.uri?eid=2-s2.0-85104935588&doi=10.1186%2fs13073-021-00884-0&partnerID=40&md5=9ddacabd853d322ac6527abe6623ca71		Article	Final	All Open Access, Gold, Green	Scopus	2-s2.0-85104935588
33850219	Author Correction: Epilepsy and neuropsychiatric comorbidities in mice carrying a recurrent Dravet syndrome SCN1A missense mutation (Scientific Reports, (2019), 9, 1, (14172), 10.1038/s41598-019-50627-w)	2021	Ricobaraza A., Mora-Jimenez L., Puerta E., Sanchez-Carpintero R., Mingorance A., Artieda J., Nicolas M.J., Besne G., Bunuales M., Gonzalez-Aparicio M., Sola-Sevilla N., Valencia M., Hernandez-Alcoceba R.	Scientific Reports	11	1	8437					10.1038/s41598-021-87092-3	https://www.scopus.com/inward/record.uri?eid=2-s2.0-85104269237&doi=10.1038%2fs41598-021-87092-3&partnerID=40&md5=767682e1bc2abf856f416bbe10697095		Erratum	Final	All Open Access, Gold, Green	Scopus	2-s2.0-85104269237
33726816	Integration of whole genome sequencing into a healthcare setting: high diagnostic rates across multiple clinical entities in 3219 rare disease patients	2021	Stranneheim H., Lagerstedt-Robinson K., Magnusson M., Kvarnung M., Nilsson D., Lesko N., Engvall M., Anderlid B.-M., Arnell H., Johansson C.B., Barbaro M., Björck E., Bruhn H., Eisfeldt J., Freyer C., Grigelioniene G., Gustavsson P., Hammarsjö A., Hellström-Pigg M., Iwarsson E., Jemt A., Laaksonen M., Enoksson S.L., Malmgren H., Naess K., Nordenskjöld M., Oscarson M., Pettersson M., Rasi C., Rose…	Genome Medicine	13	1	40				5	10.1186/s13073-021-00855-5	https://www.scopus.com/inward/record.uri?eid=2-s2.0-85103142828&doi=10.1186%2fs13073-021-00855-5&partnerID=40&md5=376af3c22550ff0ce0c43c7133eb47fe		Article	Final	All Open Access, Gold	Scopus	2-s2.0-85103142828
	The study of sodium and potassium channel gene single-nucleotide variation significance in non-mechanical forms of epilepsy	2021	Khamdiyeva O., Tileules Z., Baratzhanova G., Perfilyeva A., Djansugurova L.	Egyptian Journal of Medical Human Genetics	22	1	5					10.1186/s43042-020-00123-y	https://www.scopus.com/inward/record.uri?eid=2-s2.0-85099345179&doi=10.1186%2fs43042-020-00123-y&partnerID=40&md5=a786f033480e6958b0832d607cf64115		Article	Final	All Open Access, Gold	Scopus	2-s2.0-85099345179
	Early-onset eyelid stereotypies are a frequent and distinctive feature in Dravet syndrome	2021	Sala-Coromina J., Raspall-Chaure M., Marcé-Grau A., de la Ossa A.M., Macaya A.	Seizure	92			155	157			10.1016/j.seizure.2021.08.020	https://www.scopus.com/inward/record.uri?eid=2-s2.0-85114722846&doi=10.1016%2fj.seizure.2021.08.020&partnerID=40&md5=1cf42239124a9cfb8cd829c4a39a32ba		Article	Final		Scopus	2-s2.0-85114722846
	Relevance of NR1I2 variants on carbamazepine therapy in Mexican Mestizos with epilepsy at a tertiary-care hospital	2021	Fricke-Galindo I., Jung-Cook H., Martínez-Juárez I.E., Monroy-Jaramillo N., Ortega-Vázquez A., Rojas-Tomé I.S., Dorado P., Peñas-Lledó E., Llerena A., López-López M.	Pharmacogenomics	22	15		983	996			10.2217/pgs-2021-0081	https://www.scopus.com/inward/record.uri?eid=2-s2.0-85117349986&doi=10.2217%2fpgs-2021-0081&partnerID=40&md5=a4c61e736fb5db5e34920600cbbecae2		Article	Final		Scopus	2-s2.0-85117349986
34181986	Gastrointestinal Symptoms and Channelopathy-Associated Epilepsy	2021	Beck V.C., Isom L.L., Berg A.T.	Journal of Pediatrics	237			41	4.90E+02			10.1016/j.jpeds.2021.06.034	https://www.scopus.com/inward/record.uri?eid=2-s2.0-85114985666&doi=10.1016%2fj.jpeds.2021.06.034&partnerID=40&md5=412e3e6aa2567c0c1105f8c2329b68e2		Article	Final		Scopus	2-s2.0-85114985666
34368859	Comparative analysis of the autism-related variants between different autistic children in a family pedigree	2021	Shen L., Li P., Zheng T., Luo M., Zhang S., Huang Y., Hu Y., Li H.	Molecular Medicine Reports	24	4	697					10.3892/mmr.2021.12336	https://www.scopus.com/inward/record.uri?eid=2-s2.0-85112337169&doi=10.3892%2fmmr.2021.12336&partnerID=40&md5=6e5c5a8e96e610dd13410d0350e4bbb5		Article	Final	All Open Access, Hybrid Gold, Green	Scopus	2-s2.0-85112337169
34365140	miRNAomics analysis reveals the promoting effects of cigarette smoke extract-treated Beas-2B-derived exosomes on macrophage polarization	2021	Chen Z., Wu H., Shi R., Fan W., Zhang J., Su W., Wang Y., Li P.	Biochemical and Biophysical Research Communications	572			157	163		1	10.1016/j.bbrc.2021.07.093	https://www.scopus.com/inward/record.uri?eid=2-s2.0-85111811321&doi=10.1016%2fj.bbrc.2021.07.093&partnerID=40&md5=88d9e8850ac7e7e86a448ba9564f03ec		Article	Final		Scopus	2-s2.0-85111811321
34324871	Clonazepam attenuates neurobehavioral abnormalities in offspring exposed to maternal immune activation by enhancing GABAergic neurotransmission	2021	Yang Y., Wang B., Zhong Z., Chen H., Ding W., Hoi M.P.M.	Biochemical Pharmacology	192		114711					10.1016/j.bcp.2021.114711	https://www.scopus.com/inward/record.uri?eid=2-s2.0-85111611483&doi=10.1016%2fj.bcp.2021.114711&partnerID=40&md5=d365b415c290b1b9c3350651edb4ca3d		Article	Final		Scopus	2-s2.0-85111611483
34293681	Differences in SCN1A intronic variants result in diverse aberrant splicing patterns and are related to the phenotypes of epilepsy with febrile seizures	2021	Zhou X., Xu H., Cai X., Tang B., Liu X., Shi Y., Zheng J., Liao W., Yu L.	Epilepsy Research	176		106711					10.1016/j.eplepsyres.2021.106711	https://www.scopus.com/inward/record.uri?eid=2-s2.0-85110722042&doi=10.1016%2fj.eplepsyres.2021.106711&partnerID=40&md5=354d2ba3efa80ab106bf09e0f659a1a2		Article	Final		Scopus	2-s2.0-85110722042
34161902	Identification and successful management of near-lethal ventricular tachycardia in 2q24 deletion-associated developmental and epileptic encephalopathy	2021	Toth J., Waickman A., Jost J., Seltzer L., Vinocur J.M., Auerbach D.S.	Seizure	91			146	149			10.1016/j.seizure.2021.06.003	https://www.scopus.com/inward/record.uri?eid=2-s2.0-85109405125&doi=10.1016%2fj.seizure.2021.06.003&partnerID=40&md5=c061088ce2eaceaedb23c6bd3df21e60		Article	Final		Scopus	2-s2.0-85109405125
34218210	Association between SCN1A polymorphism and carbamazepine responsiveness in epilepsy: A meta-analysis	2021	Zhang X., Liu J., Ye J.	Epilepsy Research	176		106627				2	10.1016/j.eplepsyres.2021.106627	https://www.scopus.com/inward/record.uri?eid=2-s2.0-85109200022&doi=10.1016%2fj.eplepsyres.2021.106627&partnerID=40&md5=bfb1533c5ab5e92c903fcf2bdcf82e17		Review	Final		Scopus	2-s2.0-85109200022
34147886	Age-related evolution of EEG in Dravet syndrome: Meta-analysis of 155 patients	2021	Minato E., Myers K.A.	Seizure	91			108	111			10.1016/j.seizure.2021.06.007	https://www.scopus.com/inward/record.uri?eid=2-s2.0-85108067970&doi=10.1016%2fj.seizure.2021.06.007&partnerID=40&md5=d5f8a258255ad569aeaa699ab44e592a		Review	Final		Scopus	2-s2.0-85108067970
34086081	Gabra2 is a genetic modifier of Dravet syndrome in mice	2021	Hawkins N.A., Nomura T., Duarte S., Barse L., Williams R.W., Homanics G.E., Mulligan M.K., Contractor A., Kearney J.A.	Mammalian Genome	32	5		350	363		1	10.1007/s00335-021-09877-1	https://www.scopus.com/inward/record.uri?eid=2-s2.0-85107505215&doi=10.1007%2fs00335-021-09877-1&partnerID=40&md5=add2acb4e12ebadc93af644b4c29ebca		Article	Final	All Open Access, Hybrid Gold, Green	Scopus	2-s2.0-85107505215
	Transfer of SCN1A to the brain of adolescent mouse model of Dravet syndrome improves epileptic, motor, and behavioral manifestations	2021	Mora-Jimenez L., Valencia M., Sanchez-Carpintero R., Tønnesen J., Fadila S., Rubinstein M., Gonzalez-Aparicio M., Bunuales M., Fernandez-Pierola E., Nicolas M.J., Puerta E., Miguelez C., Minguez P.G., Lumbreras S., Gonzalez-Aseguinolaza G., Ricobaraza A., Hernandez-Alcoceba R.	Molecular Therapy - Nucleic Acids	25			585	602			10.1016/j.omtn.2021.08.003	https://www.scopus.com/inward/record.uri?eid=2-s2.0-85114684659&doi=10.1016%2fj.omtn.2021.08.003&partnerID=40&md5=37bdd2db3b06c2d2e2c1ac113e72a986		Article	Final	All Open Access, Gold, Green	Scopus	2-s2.0-85114684659
34475263	Seizure phenotype and underlying cellular defects in drosophila knock-in models of DS (R1648C) and GEFS1 (R1648H) SCN1A epilepsy	2021	Roemmich A.J., Vu T., Lukacsovich T., Hawkins C., Schutte S.S., O’Dowd D.K.	eNeuro	8	5	ENEURO.0002-21.2021					10.1523/ENEURO.0002-21.2021	https://www.scopus.com/inward/record.uri?eid=2-s2.0-85115228590&doi=10.1523%2fENEURO.0002-21.2021&partnerID=40&md5=307e3b735aa143bc9682ad1b444f9600		Article	Final	All Open Access, Gold, Green	Scopus	2-s2.0-85115228590
34412058	Antisense Oligonucleotide Therapy for Neurodevelopmental Disorders	2021	Hill S.F., Meisler M.H.	Developmental Neuroscience	43	3月4日		247	252			10.1159/000517686	https://www.scopus.com/inward/record.uri?eid=2-s2.0-85112390780&doi=10.1159%2f000517686&partnerID=40&md5=f7cae8244660e26ab3632c20419b7659		Review	Final	All Open Access, Bronze	Scopus	2-s2.0-85112390780
34338318	Defining Dravet syndrome: An essential pre-requisite for precision medicine trials	2021	Li W., Schneider A.L., Scheffer I.E.	Epilepsia	62	9		2205	2217			10.1111/epi.17015	https://www.scopus.com/inward/record.uri?eid=2-s2.0-85111660735&doi=10.1111%2fepi.17015&partnerID=40&md5=1026e2224f03036ae7765148e48b376d		Article	Final	All Open Access, Hybrid Gold, Green	Scopus	2-s2.0-85111660735
34226156	Genetics and clinical correlation of Dravet syndrome and its mimics – experience of a tertiary center in Taiwan	2021	Liu Y.-H., Cheng Y.-T., Tsai M.-H., Chou I.-J., Hung P.-C., Hsieh M.-Y., Wang Y.-S., Chen Y.-J., Kuo C.-Y., Lin J.-J., Wang H.-S., Lin K.-L.	Pediatrics and Neonatology	62	5		550	558			10.1016/j.pedneo.2021.05.022	https://www.scopus.com/inward/record.uri?eid=2-s2.0-85109076610&doi=10.1016%2fj.pedneo.2021.05.022&partnerID=40&md5=6ddc576df25a0edaa4092c640ffa23de		Article	Final	All Open Access, Gold	Scopus	2-s2.0-85109076610
34144125	Proteomic signature of the Dravet syndrome in the genetic Scn1a-A1783V mouse model	2021	Miljanovic N., Hauck S.M., van Dijk R.M., Di Liberto V., Rezaei A., Potschka H.	Neurobiology of Disease	157		105423				1	10.1016/j.nbd.2021.105423	https://www.scopus.com/inward/record.uri?eid=2-s2.0-85108444198&doi=10.1016%2fj.nbd.2021.105423&partnerID=40&md5=4bbbc29ed62c64ae7f61ca6250d5563f		Article	Final	All Open Access, Gold, Green	Scopus	2-s2.0-85108444198
33971653	Targeting Poison Exons to Treat Developmental and Epileptic Encephalopathy	2021	Aziz M.C., Schneider P.N., Carvill G.L.	Developmental Neuroscience	43	3		241	246			10.1159/000516143	https://www.scopus.com/inward/record.uri?eid=2-s2.0-85107592665&doi=10.1159%2f000516143&partnerID=40&md5=73efb9cad5100e50a1fe743c92667f89		Review	Final	All Open Access, Bronze	Scopus	2-s2.0-85107592665
33940579	CRISPR/dCas9 as a Therapeutic Approach for Neurodevelopmental Disorders: Innovations and Limitations Compared to Traditional Strategies	2021	Ricci R., Colasante G.	Developmental Neuroscience	43	3		253	261			10.1159/000515845	https://www.scopus.com/inward/record.uri?eid=2-s2.0-85105753758&doi=10.1159%2f000515845&partnerID=40&md5=64fa9901f9b0d87c48d88aa4bece2da1		Review	Final	All Open Access, Bronze	Scopus	2-s2.0-85105753758
33864849	Lasting effects of mild embryonic ethanol exposure on voltage-gated ion channels in adult zebrafish brain	2021	Chatterjee D., Mahabir S., Chatterjee D., Gerlai R.	Progress in Neuro-Psychopharmacology and Biological Psychiatry	110		110327				1	10.1016/j.pnpbp.2021.110327	https://www.scopus.com/inward/record.uri?eid=2-s2.0-85104360720&doi=10.1016%2fj.pnpbp.2021.110327&partnerID=40&md5=aaa461d91d5e78f2976fe259293a882f		Article	Final		Scopus	2-s2.0-85104360720
34365615	Analysis of clinical phenotype and SCN1A gene variant in a pedigree affected with genetic epilepsy with febrile seizures	2021	Sun S., Li X., Song J., Li Y., Xu L., Xia B., Hua Y., Zhu L., Wang J.	Zhonghua yi xue yi chuan xue za zhi = Zhonghua yixue yichuanxue zazhi = Chinese journal of medical genetics	38	8		745	748		1	10.3760/cma.j.cn511374-20200820-00614	https://www.scopus.com/inward/record.uri?eid=2-s2.0-85113736671&doi=10.3760%2fcma.j.cn511374-20200820-00614&partnerID=40&md5=d1cf852d7acdee0d1c887dee56fa5739		Article	Final		Scopus	2-s2.0-85113736671
	CRISPRa-Mediated Upregulation of scn1laa during Early Development Causes Epileptiform Activity and dCas9-Associated Toxicity	2021	Weuring W.J., Dilevska I., Hoekman J., Van De Vondervoort J., Koetsier M., Van 'T Slot R.H., Braun K.P.J., Koeleman B.P.C.	CRISPR Journal	4	4		575	582			10.1089/crispr.2021.0013	https://www.scopus.com/inward/record.uri?eid=2-s2.0-85113301044&doi=10.1089%2fcrispr.2021.0013&partnerID=40&md5=a5358955e6dda590c5760b2f3204ca92		Article	Final		Scopus	2-s2.0-85113301044
34247112	Generation of SCN1A Knock out induced pluripotent stem cell (iPSC) line	2021	Shan W., Yang X., Ren Q., Wang Q.	Stem Cell Research	55		102452					10.1016/j.scr.2021.102452	https://www.scopus.com/inward/record.uri?eid=2-s2.0-85109456396&doi=10.1016%2fj.scr.2021.102452&partnerID=40&md5=5c002c83bb80cc4a198df985f2d79b88		Article	Final	All Open Access, Gold	Scopus	2-s2.0-85109456396
34223647	Metabolomic signature of the Dravet syndrome: A genetic mouse model study	2021	Miljanovic N., van Dijk R.M., Buchecker V., Potschka H.	Epilepsia	62	8		2000	2014			10.1111/epi.16976	https://www.scopus.com/inward/record.uri?eid=2-s2.0-85109188172&doi=10.1111%2fepi.16976&partnerID=40&md5=8cce67dc27ca45509c464aff9ebc73f4		Article	Final	All Open Access, Hybrid Gold	Scopus	2-s2.0-85109188172
34020146	Clinical and genetic characteristics of epilepsy of infancy with migrating focal seizures in Chinese children	2021	Fang Z.-X., Xie L.-L., Yan L.-S., Lin H., Pan Y.-N., Liu B.-K., Jiang Y., Cheng M., Li X.-J., Jiang L.	Epilepsy Research	174		106669					10.1016/j.eplepsyres.2021.106669	https://www.scopus.com/inward/record.uri?eid=2-s2.0-85106226496&doi=10.1016%2fj.eplepsyres.2021.106669&partnerID=40&md5=6ea932b629336eddf825017c432f9440		Article	Final		Scopus	2-s2.0-85106226496
33856647	Epilepsy and Migraine Shared Genetic and Molecular Mechanisms: Focus on Therapeutic Strategies	2021	Gotra P., Bhardwaj N., Ludhiadch A., Singh G., Munshi A.	Molecular Neurobiology	58	8		3874	3883		1	10.1007/s12035-021-02386-x	https://www.scopus.com/inward/record.uri?eid=2-s2.0-85104767226&doi=10.1007%2fs12035-021-02386-x&partnerID=40&md5=55c811f16f185eb317e82e231f2c0c90		Review	Final		Scopus	2-s2.0-85104767226
	Perampanel Reduces Hyperthermia-Induced Seizures in Dravet Syndrome Mouse Model	2021	Ho S.-Y., Lin L., Chen I.-C., Tsai C.-W., Chang F.-C., Liou H.-H.	Frontiers in Pharmacology	12		682767					10.3389/fphar.2021.682767	https://www.scopus.com/inward/record.uri?eid=2-s2.0-85111423401&doi=10.3389%2ffphar.2021.682767&partnerID=40&md5=6b900949d709b9126c4e89df90a343ca		Article	Final	All Open Access, Gold, Green	Scopus	2-s2.0-85111423401
34309607	A Behavioral Screen for Heat-Induced Seizures in Mouse Models of Epilepsy	2021	Das A., Smith M.A., O'Dowd D.K.	Journal of visualized experiments : JoVE		173						10.3791/62846	https://www.scopus.com/inward/record.uri?eid=2-s2.0-85112589540&doi=10.3791%2f62846&partnerID=40&md5=f09287988aea22a2e11822d9728b610b		Article	Final	All Open Access, Bronze	Scopus	2-s2.0-85112589540
34314446	Modeling NaV1.1/SCN1A sodium channel mutations in a microcircuit with realistic ion concentration dynamics suggests differential GABAergic mechanisms leading to hyperexcitability in epilepsy and hemiplegic migraine	2021	Lemaire L., Desroches M., Krupa M., Pizzamiglio L., Scalmani P., Mantegazza M.	PLoS Computational Biology	17	7	e1009239					10.1371/journal.pcbi.1009239	https://www.scopus.com/inward/record.uri?eid=2-s2.0-85111768940&doi=10.1371%2fjournal.pcbi.1009239&partnerID=40&md5=c3ee97b75dd4e515283ddb6259aea1f6		Article	Final	All Open Access, Gold, Green	Scopus	2-s2.0-85111768940
34174751	SCN1A-related epilepsy with recessive inheritance: Two further families	2021	Moretti R., Arnaud L., Bouteiller D., Trouillard O., Moreau P., Buratti J., Rastetter A., Keren B., Des Portes V., Toulouse J., Gourfinkel-An I., Leguern E., Depienne C., Mignot C., Nava C.	European Journal of Paediatric Neurology	33			121	124			10.1016/j.ejpn.2021.05.018	https://www.scopus.com/inward/record.uri?eid=2-s2.0-85108448055&doi=10.1016%2fj.ejpn.2021.05.018&partnerID=40&md5=27777a52090431463ade76dbcb34f41d		Article	Final		Scopus	2-s2.0-85108448055
34002394	Development of an antiseizure drug screening platform for Dravet syndrome at the NINDS contract site for the Epilepsy Therapy Screening Program	2021	Pernici C.D., Mensah J.A., Dahle E.J., Johnson K.J., Handy L., Buxton L., Smith M.D., West P.J., Metcalf C.S., Wilcox K.S.	Epilepsia	62	7		1665	1676		1	10.1111/epi.16925	https://www.scopus.com/inward/record.uri?eid=2-s2.0-85105869076&doi=10.1111%2fepi.16925&partnerID=40&md5=832a9e8dfed3467244ed2c1cdad6fa40		Article	Final	All Open Access, Hybrid Gold, Green	Scopus	2-s2.0-85105869076
33756436	Associations between CYP3A4, CYP3A5 and SCN1A polymorphisms and carbamazepine metabolism in epilepsy: A meta-analysis	2021	Zhao G.-X., Zhang Z., Cai W.-K., Shen M.-L., Wang P., He G.-H.	Epilepsy Research	173		106615				2	10.1016/j.eplepsyres.2021.106615	https://www.scopus.com/inward/record.uri?eid=2-s2.0-85102772701&doi=10.1016%2fj.eplepsyres.2021.106615&partnerID=40&md5=181fc6b90efab9159361fbba381abe2e		Article	Final	All Open Access, Green	Scopus	2-s2.0-85102772701
32880473	Electroclinical Phenotype-Genotype Homogeneity in Drug-Resistant “Generalized” Tonic-Clonic Seizures of Early Childhood	2021	Jukkarwala A., Menon R.N., Sunesh E.R., Radhakrishnan A.	Clinical EEG and Neuroscience	52	5		371	375			10.1177/1550059420953735	https://www.scopus.com/inward/record.uri?eid=2-s2.0-85090162259&doi=10.1177%2f1550059420953735&partnerID=40&md5=10b9a067c93044260002371bee9e9d5a		Article	Final		Scopus	2-s2.0-85090162259
	Gene and Phenotype Expansion of Unexplained Early Infantile Epileptic Encephalopathy	2021	Liu X., Shen Q., Zheng G., Guo H., Lu X., Wang X., Yang X., Cao Z., Chen J.	Frontiers in Neurology	12		633637					10.3389/fneur.2021.633637	https://www.scopus.com/inward/record.uri?eid=2-s2.0-85108326899&doi=10.3389%2ffneur.2021.633637&partnerID=40&md5=e16c05a80b331400e8c079db429fa289		Article	Final	All Open Access, Gold, Green	Scopus	2-s2.0-85108326899
34106054	Focal epilepsy due to de novo SCN1A mutation	2021	Laur D., Dozières-Puyravel B., Iléa A., Nava C., Delanoë C., Nasser H., Le Guern E., Auvin S.	Epileptic Disorders	23	3		459	465			10.1684/epd.2021.1285	https://www.scopus.com/inward/record.uri?eid=2-s2.0-85111592611&doi=10.1684%2fepd.2021.1285&partnerID=40&md5=4b2cb7353dda02a8a94590ecf9399836		Article	Final		Scopus	2-s2.0-85111592611
33901312	Homozygous SCN1B variants causing early infantile epileptic encephalopathy 52 affect voltage-gated sodium channel function	2021	Scala M., Efthymiou S., Sultan T., De Waele J., Panciroli M., Salpietro V., Maroofian R., Striano P., Van Petegem F., Houlden H., Bosmans F.	Epilepsia	62	6		e82	e87			10.1111/epi.16913	https://www.scopus.com/inward/record.uri?eid=2-s2.0-85105087166&doi=10.1111%2fepi.16913&partnerID=40&md5=c0c2d5aff5278d70f399736ef17f948b		Article	Final		Scopus	2-s2.0-85105087166
33676317	Two-photon calcium imaging of seizures in awake, head-fixed mice	2021	Somarowthu A., Goff K.M., Goldberg E.M.	Cell Calcium	96		102380				2	10.1016/j.ceca.2021.102380	https://www.scopus.com/inward/record.uri?eid=2-s2.0-85101795005&doi=10.1016%2fj.ceca.2021.102380&partnerID=40&md5=9e0497d2d33edbdf958a0c4d3f1b3ffe		Article	Final		Scopus	2-s2.0-85101795005
	Deciphering in silico the Role of Mutated NaV1.1 Sodium Channels in Enhancing Trigeminal Nociception in Familial Hemiplegic Migraine Type 3	2021	Suleimanova A., Talanov M., van den Maagdenberg A.M.J.M., Giniatullin R.	Frontiers in Cellular Neuroscience	15		644047					10.3389/fncel.2021.644047	https://www.scopus.com/inward/record.uri?eid=2-s2.0-85107900817&doi=10.3389%2ffncel.2021.644047&partnerID=40&md5=9ab0cd0b53e969e764b884671138061a		Article	Final	All Open Access, Gold, Green	Scopus	2-s2.0-85107900817
	CACNA1A-Linked Hemiplegic Migraine in GLUT 1 Deficiency Syndrome: A Case Report	2021	Scoppola C., Magli G., Conti M., Fadda M., Luzzu G.M., Simula D.M., Carta A., Sotgiu S., Casellato S.	Frontiers in Neurology	12		679354					10.3389/fneur.2021.679354	https://www.scopus.com/inward/record.uri?eid=2-s2.0-85107725480&doi=10.3389%2ffneur.2021.679354&partnerID=40&md5=11e483e1185243dcf54fc36d90d30186		Article	Final	All Open Access, Gold, Green	Scopus	2-s2.0-85107725480
34011048	Effects of SCN1A and SCN2A polymorphisms on responsiveness to valproic acid monotherapy in epileptic children: A protocol for systematic review and meta-analysis	2021	Wen Z., Chen J., Zhu B., Lu Y., Chen L.	Medicine	100	20		e25831				10.1097/MD.0000000000025831	https://www.scopus.com/inward/record.uri?eid=2-s2.0-85106634606&doi=10.1097%2fMD.0000000000025831&partnerID=40&md5=8ed4a81993f335dd180ff52f0f25bb0a		Article	Final	All Open Access, Gold, Green	Scopus	2-s2.0-85106634606
33798941	Effects of antiepileptic drugs’ administration during pregnancy on the nerve cell proliferation and axonal outgrowth of human neuroblastoma SH-SY5Y nerve cells	2021	Kakumoto M., Shimokawa K., Ueshima S., Hira D., Okano T.	Biochemical and Biophysical Research Communications	554			151	157			10.1016/j.bbrc.2021.03.107	https://www.scopus.com/inward/record.uri?eid=2-s2.0-85103342349&doi=10.1016%2fj.bbrc.2021.03.107&partnerID=40&md5=7e8e05a671e3bb0df1d57b1a05eb6cba		Article	Final		Scopus	2-s2.0-85103342349
	The Heat Sensing Trpv1 Receptor Is Not a Viable Anticonvulsant Drug Target in the Scn1a +/− Mouse Model of Dravet Syndrome	2021	Satpute Janve V., Anderson L.L., Bahceci D., Hawkins N.A., Kearney J.A., Arnold J.C.	Frontiers in Pharmacology	12		675128				1	10.3389/fphar.2021.675128	https://www.scopus.com/inward/record.uri?eid=2-s2.0-85107211849&doi=10.3389%2ffphar.2021.675128&partnerID=40&md5=81428828aa96e7884248558188d48f3d		Article	Final	All Open Access, Gold, Green	Scopus	2-s2.0-85107211849
32554108	Losing the Beat: Contribution of Purkinje Cell Firing Dysfunction to Disease, and Its Reversal	2021	Cook A.A., Fields E., Watt A.J.	Neuroscience	462			247	261		9	10.1016/j.neuroscience.2020.06.008	https://www.scopus.com/inward/record.uri?eid=2-s2.0-85087352069&doi=10.1016%2fj.neuroscience.2020.06.008&partnerID=40&md5=d0e3a3203b7033f06423a1f07fe3d924		Review	Final	All Open Access, Hybrid Gold	Scopus	2-s2.0-85087352069
33937968	Dravet syndrome and Dravet syndrome-like phenotype: a systematic review of the SCN1A and PCDH19 variants	2021	Rampazzo A.C.M., dos Santos R.R.P., Maluf F.A., Simm R.F., Marson F.A.L., Ortega M.M., de Aguiar P.H.P.	Neurogenetics	22	2		105	115			10.1007/s10048-021-00644-7	https://www.scopus.com/inward/record.uri?eid=2-s2.0-85105398961&doi=10.1007%2fs10048-021-00644-7&partnerID=40&md5=4b7efdc604b996ec453d8b1c96e32348		Review	Final		Scopus	2-s2.0-85105398961
33895391	Mutations in the sodium channel genes SCN1A, SCN3A, and SCN9A in children with epilepsy with febrile seizures plus(EFS+)	2021	Ma H., Guo Y., Chen Z., Wang L., Tang Z., Zhang J., Miao Q., Zhai Q.	Seizure	88			146	152		1	10.1016/j.seizure.2021.04.006	https://www.scopus.com/inward/record.uri?eid=2-s2.0-85104808555&doi=10.1016%2fj.seizure.2021.04.006&partnerID=40&md5=5f37706276f51cae95b91d6a9fc5f639		Article	Final		Scopus	2-s2.0-85104808555
33839563	Epilepsy in patients with familial hemiplegic migraine	2021	Hasırcı Bayır B.R., Tutkavul K., Eser M., Baykan B.	Seizure	88			87	94		2	10.1016/j.seizure.2021.03.028	https://www.scopus.com/inward/record.uri?eid=2-s2.0-85103798815&doi=10.1016%2fj.seizure.2021.03.028&partnerID=40&md5=b761fc34f6212ce607c121f712cf4bd1		Review	Final		Scopus	2-s2.0-85103798815
33450277	Allosteric modulation of the cannabinoid 2 receptor confers seizure resistance in mice	2021	Shapiro L., Gado F., Manera C., Escayg A.	Neuropharmacology	188		108448				2	10.1016/j.neuropharm.2021.108448	https://www.scopus.com/inward/record.uri?eid=2-s2.0-85102498226&doi=10.1016%2fj.neuropharm.2021.108448&partnerID=40&md5=d55f0a0a9202d333f6a947a7f0760ab1		Article	Final		Scopus	2-s2.0-85102498226
33721710	The MinION as a cost-effective technology for diagnostic screening of the SCN1A gene in epilepsy patients	2021	Ngo T.T.D., Lea R.A., Maksemous N., Eccles D.A., Smith R.A., Dunn P.J., Thao V.C., Ha T.M.T., Bùi C.B., Haupt L.M., Scott R., Griffiths L.R.	Epilepsy Research	172		106593					10.1016/j.eplepsyres.2021.106593	https://www.scopus.com/inward/record.uri?eid=2-s2.0-85102279348&doi=10.1016%2fj.eplepsyres.2021.106593&partnerID=40&md5=cb5d57489e8b4783c6ce73b2b6031b09		Article	Final		Scopus	2-s2.0-85102279348
33674996	De novo homozygous variant of the SCN1A gene in a patient with severe Dravet syndrome complicated by acute encephalopathy	2021	Van L.T.K., Hien H.T.D., Kieu H.T.T., Hieu N.L.T., Vinh L.S., Hoa G., Hang D.T.T.	Neurogenetics	22	2		133	136			10.1007/s10048-021-00636-7	https://www.scopus.com/inward/record.uri?eid=2-s2.0-85102184311&doi=10.1007%2fs10048-021-00636-7&partnerID=40&md5=74199d08518bc01b073f17f94a09006e		Article	Final		Scopus	2-s2.0-85102184311
	SCN1A-associated epilepsy with foudroyant course: the long-term prognosis is not necessarily disastrous! [SCN1A-assoziierte Epilepsie mit foudroyantem Verlauf: Nicht immer muss die Langzeitprognose schlecht sein!]	2021	Steinhoff B.J., Wiemer-Kruel A., Bast T.	Zeitschrift fur Epileptologie	34	2		181	186			10.1007/s10309-021-00403-6	https://www.scopus.com/inward/record.uri?eid=2-s2.0-85100859511&doi=10.1007%2fs10309-021-00403-6&partnerID=40&md5=d87bf09c6da97fcf832976d8aa133a9c		Review	Final		Scopus	2-s2.0-85100859511
	Dravet syndrome—toward an optimal and disease-specific treatment [Dravet-Syndrom – auf dem Weg zu einer optimalen und krankheitsspezifischen Behandlung]	2021	Schoonjans A.-S., Ceulemans B.	Zeitschrift fur Epileptologie	34	2		146	153		1	10.1007/s10309-021-00399-z	https://www.scopus.com/inward/record.uri?eid=2-s2.0-85100420926&doi=10.1007%2fs10309-021-00399-z&partnerID=40&md5=d1e297101e1e2db3b36f4f7837118650		Review	Final		Scopus	2-s2.0-85100420926
	Role of Pharmacogenetics in Adverse Drug Reactions: An Update towards Personalized Medicine	2021	Micaglio E., Locati E.T., Monasky M.M., Romani F., Heilbron F., Pappone C.	Frontiers in Pharmacology	12		651720				1	10.3389/fphar.2021.651720	https://www.scopus.com/inward/record.uri?eid=2-s2.0-85105947820&doi=10.3389%2ffphar.2021.651720&partnerID=40&md5=ce547a0b41ddaf740ee199148ee44ffb		Review	Final	All Open Access, Gold	Scopus	2-s2.0-85105947820
33902251	Genetics Analysis of patients with Dravet syndrome due to mosaicism variation of paternal SCN1A gene [父源SCN1A基因嵌合变异与子代发生Dravet综合征的病因分析]	2021	Huo M., Niu W., Xu J., Shi H., Liu Y., Zhang Y.	National Medical Journal of China	101	16		1182	1185			10.3760/cma.j.cn112137-20201225-03468	https://www.scopus.com/inward/record.uri?eid=2-s2.0-85105049132&doi=10.3760%2fcma.j.cn112137-20201225-03468&partnerID=40&md5=76eb355a7eb2f9d4e7e7722e6524d2e8		Article	Final		Scopus	2-s2.0-85105049132
33651714	Neddylation stabilizes Nav1.1 to maintain interneuron excitability and prevent seizures in murine epilepsy models	2021	Chen W., Luo B., Gao N., Li H., Wang H., Li L., Cui W., Zhang L., Sun D., Liu F., Dong Z., Ren X., Zhang H., Su H., Xiong W.-C., Mei L.	Journal of Clinical Investigation	131	8	e136956				2	10.1172/JCI136956	https://www.scopus.com/inward/record.uri?eid=2-s2.0-85104190136&doi=10.1172%2fJCI136956&partnerID=40&md5=43af9da2b41bd9bf126a6fc41806d989		Article	Final	All Open Access, Bronze, Green	Scopus	2-s2.0-85104190136
33855971	Epilepsy channelopathies go neddy: Stabilizing NaV1.1 channels by neddylation	2021	Cannon S.C.	Journal of Clinical Investigation	131	8	e148370					10.1172/JCI148370	https://www.scopus.com/inward/record.uri?eid=2-s2.0-85104188729&doi=10.1172%2fJCI148370&partnerID=40&md5=52691126ff2b3ca8d47885906b000b0c		Review	Final		Scopus	2-s2.0-85104188729
33851920	Temporal-parietal-occipital epilepsy in GEFS+ associated with SCN1A mutation	2021	Riva A., Coppola A., Balagura G., Scala M., Iacomino M., Marchese F., Amadori E., Lattanzi S., Meo R., Striano S., Salpietro V., Zara F., Minetti C., Striano P., Bilo L.	Epileptic Disorders	23	2		397	401			10.1684/epd.2021.1266	https://www.scopus.com/inward/record.uri?eid=2-s2.0-85106553149&doi=10.1684%2fepd.2021.1266&partnerID=40&md5=e2ffd60836a203c993728e4223804f9a		Article	Final		Scopus	2-s2.0-85106553149
33395108	Dravet syndrome	2021	Lagae L.	Current opinion in neurology	34	2		213	218		1	10.1097/WCO.0000000000000902	https://www.scopus.com/inward/record.uri?eid=2-s2.0-85102604026&doi=10.1097%2fWCO.0000000000000902&partnerID=40&md5=fc755711ccc39731ed3217387b4e9e3b		Article	Final		Scopus	2-s2.0-85102604026
33677403	A systematic review of adults with Dravet syndrome	2021	Selvarajah A., Zulfiqar-Ali Q., Marques P., Rong M., Andrade D.M.	Seizure	87			39	45		2	10.1016/j.seizure.2021.02.025	https://www.scopus.com/inward/record.uri?eid=2-s2.0-85102010310&doi=10.1016%2fj.seizure.2021.02.025&partnerID=40&md5=fb6867d2265b7fa71698f32dcc21a584		Review	Final	All Open Access, Bronze	Scopus	2-s2.0-85102010310
32880951	Recent advances in gene therapy for neurodevelopmental disorders with epilepsy	2021	Turner T.J., Zourray C., Schorge S., Lignani G.	Journal of Neurochemistry	157	2		229	262		4	10.1111/jnc.15168	https://www.scopus.com/inward/record.uri?eid=2-s2.0-85091613207&doi=10.1111%2fjnc.15168&partnerID=40&md5=86f84cf0899fa5bb882c72650e23d2b5		Review	Final	All Open Access, Hybrid Gold, Green	Scopus	2-s2.0-85091613207
33761731	Genetic factors and the risk of drug-resistant epilepsy in young children with epilepsy and neurodevelopment disability: A prospective study and updated meta-analysis	2021	Lin C.-H., Chou I.-C., Hong S.-Y.	Medicine	100	12		e25277				10.1097/MD.0000000000025277	https://www.scopus.com/inward/record.uri?eid=2-s2.0-85103491873&doi=10.1097%2fMD.0000000000025277&partnerID=40&md5=5cc4c058d2bfa434b3b37f9f27f7b423		Article	Final	All Open Access, Gold, Green	Scopus	2-s2.0-85103491873
	Editorial: Interplay Between Ion Channels, the Nervous System, and Embryonic Development	2021	Levin M., Ribera A.B.	Frontiers in Molecular Neuroscience	14		618815					10.3389/fnmol.2021.618815	https://www.scopus.com/inward/record.uri?eid=2-s2.0-85103876128&doi=10.3389%2ffnmol.2021.618815&partnerID=40&md5=a4444fac6f39ca4c3f3d26e1fdf102fb		Editorial	Final	All Open Access, Gold, Green	Scopus	2-s2.0-85103876128
	Voltage Gated Sodium Channel Genes in Epilepsy: Mutations, Functional Studies, and Treatment Dimensions	2021	Ademuwagun I.A., Rotimi S.O., Syrbe S., Ajamma Y.U., Adebiyi E.	Frontiers in Neurology	12		600050				1	10.3389/fneur.2021.600050	https://www.scopus.com/inward/record.uri?eid=2-s2.0-85103839259&doi=10.3389%2ffneur.2021.600050&partnerID=40&md5=00e0ca8132dde769dd406aa9f8a4e049		Review	Final	All Open Access, Gold	Scopus	2-s2.0-85103839259
33658306	Interneuron dysfunction in a new mouse model of scn1a gefs+	2021	Das A., Zhu B., Xie Y., Zeng L., Pham A.T., Neumann J.C., Safrina O., Benavides D.R., Macgregor G.R., Schutte S.S., Hunt R.F., O’dowd D.K.	eNeuro	8	2	ENEURO.0394-20.2021					10.1523/ENEURO.0394-20.2021	https://www.scopus.com/inward/record.uri?eid=2-s2.0-85103918812&doi=10.1523%2fENEURO.0394-20.2021&partnerID=40&md5=4e8c9ecf6c543e58a92b32f01b1edf08		Article	Final	All Open Access, Gold, Green	Scopus	2-s2.0-85103918812
33531663	Sodium channelopathies in neurodevelopmental disorders	2021	Meisler M.H., Hill S.F., Yu W.	Nature Reviews Neuroscience	22	3		152	166		7	10.1038/s41583-020-00418-4	https://www.scopus.com/inward/record.uri?eid=2-s2.0-85100312860&doi=10.1038%2fs41583-020-00418-4&partnerID=40&md5=0bbe0ad0fd3c5149328267d0dc8d5b15		Review	Final		Scopus	2-s2.0-85100312860
33478845	Multicenter prospective longitudinal study in 34 patients with Dravet syndrome: Neuropsychological development in the first six years of life	2021	Battaglia D., Chieffo D., Lucibello S., Marini C., Sibilia V., Mei D., Darra F., Offredi F., Fontana E., Specchio N., Cappelletti S., Granata T., Ragona F., Patrini M., Baglietto M.G., Prato G., Ferrari A., Vigevano F., Mercuri E., Bernardina B.D., Guerrini R., Dravet C., Guzzetta F.	Brain and Development	43	3		419	430			10.1016/j.braindev.2020.10.004	https://www.scopus.com/inward/record.uri?eid=2-s2.0-85099628852&doi=10.1016%2fj.braindev.2020.10.004&partnerID=40&md5=78180285b20272aeafcf9959ac70a390		Article	Final		Scopus	2-s2.0-85099628852
	Getting a Foot IN the Door: GABAergic INterneuron-Specific Enhancers	2021	Goldberg E.M.	Epilepsy Currents	21	2		114	116			10.1177/1535759720985841	https://www.scopus.com/inward/record.uri?eid=2-s2.0-85098945715&doi=10.1177%2f1535759720985841&partnerID=40&md5=7c8fe31d72bb7fbc2046061a48d4eb87		Note	Final	All Open Access, Gold, Green	Scopus	2-s2.0-85098945715
33199159	Dravet syndrome with parkinsonian symptoms and intact dopaminergic neurons: A case report	2021	Kanatani M., Adachi T., Sakata R., Nishimura Y., Saito Y., Maegaki Y., Watanabe Y., Hanajima R.	Brain and Development	43	3		486	489			10.1016/j.braindev.2020.10.015	https://www.scopus.com/inward/record.uri?eid=2-s2.0-85096162758&doi=10.1016%2fj.braindev.2020.10.015&partnerID=40&md5=1d2e400371a482c8a7fc5fa3dd4b1a7b		Article	Final		Scopus	2-s2.0-85096162758
33565071	Analysis of SCN1A gene variants among patients with Dravet syndrome	2021	Li L., Zhu D.	Zhonghua yi xue yi chuan xue za zhi = Zhonghua yixue yichuanxue zazhi = Chinese journal of medical genetics	38	2		158	161			10.3760/cma.j.cn511374-20200120-00041	https://www.scopus.com/inward/record.uri?eid=2-s2.0-85100980688&doi=10.3760%2fcma.j.cn511374-20200120-00041&partnerID=40&md5=c4a60ee0be649442336e9d1b60765981		Article	Final		Scopus	2-s2.0-85100980688
	Relative quantification of nav1.1 protein in mouse brains using a meso scale discovery- electrochemiluminescence (msd-ecl) method	2021	Han Z., Christiansen A., Meena, Liau G.	Bio-protocol	11	3	e3910					10.21769/BioProtoc.3910	https://www.scopus.com/inward/record.uri?eid=2-s2.0-85115982970&doi=10.21769%2fBioProtoc.3910&partnerID=40&md5=367b8e09a768a4f62e9e351ad698c317		Article	Final		Scopus	2-s2.0-85115982970
33912281	Cou cou, flying fish and a whole exome please… lessons learned from genetic testing in barbados	2021	Scantlebury M.H., Barrett K.T., Jacinto S., Corbin D.O.C., Kerr M., Khan A.	Pan African Medical Journal	38		111					10.11604/pamj.2021.38.111.27969	https://www.scopus.com/inward/record.uri?eid=2-s2.0-85103537771&doi=10.11604%2fpamj.2021.38.111.27969&partnerID=40&md5=c3ca1aab66320773c3c701881d4d1581		Article	Final		Scopus	2-s2.0-85103537771
33453592	Epilepsy with auditory features: Contribution of known genes in 112 patients	2021	Bisulli F., Rinaldi C., Pippucci T., Minardi R., Baldassari S., Zenesini C., Mostacci B., Fanella M., Avoni P., Menghi V., Caporali L., Muccioli L., Tinuper P., Licchetta L.	Seizure	85			115	118			10.1016/j.seizure.2020.12.015	https://www.scopus.com/inward/record.uri?eid=2-s2.0-85099304676&doi=10.1016%2fj.seizure.2020.12.015&partnerID=40&md5=f4d4359eab9cc68b7a3186f3109e0f6f		Article	Final		Scopus	2-s2.0-85099304676
33049783	The Direct Costs of Dravet's Syndrome before and after Diagnosis Assessment	2021	Česká K., Český L., Ošlejšková H., Aulická Š.	Neuropediatrics	52	1		6	11			10.1055/s-0040-1718518	https://www.scopus.com/inward/record.uri?eid=2-s2.0-85094117132&doi=10.1055%2fs-0040-1718518&partnerID=40&md5=aa9f64e714e9fc25a08f45ff08ce460e		Article	Final		Scopus	2-s2.0-85094117132
	Neuropathological Characterization of a Dravet Syndrome Knock-In Mouse Model Useful for Investigating Cannabinoid Treatments	2021	Satta V., Alonso C., Díez P., Martín-Suárez S., Rubio M., Encinas J.M., Fernández-Ruiz J., Sagredo O.	Frontiers in Molecular Neuroscience	13		602801					10.3389/fnmol.2020.602801	https://www.scopus.com/inward/record.uri?eid=2-s2.0-85100844197&doi=10.3389%2ffnmol.2020.602801&partnerID=40&md5=635d1fdcc3a34f932d5ec8c81f5690c1		Article	Final	All Open Access, Gold, Green	Scopus	2-s2.0-85100844197
	Genomic and Epigenetic Advances in Focal Cortical Dysplasia Types I and II: A Scoping Review	2021	Jesus-Ribeiro J., Pires L.M., Melo J.D., Ribeiro I.P., Rebelo O., Sales F., Freire A., Melo J.B.	Frontiers in Neuroscience	14		580357				3	10.3389/fnins.2020.580357	https://www.scopus.com/inward/record.uri?eid=2-s2.0-85100541573&doi=10.3389%2ffnins.2020.580357&partnerID=40&md5=7ff6ee6667bb33f22ee51d9b5d91ac3c		Review	Final	All Open Access, Gold, Green	Scopus	2-s2.0-85100541573
33234612	Impaired θ-γ Coupling indicates inhibitory dysfunction and seizure risk in adravet syndromemouse model	2021	Jansen N.A., Perez C., Schenke M., Van Beurden A.W., Dehghani A., Voskuyl R.A., Thijs R.D., Ullah G., Van Den Maagdenberg A.M.J.M., Tolner E.A.	Journal of Neuroscience	41	3		524	537		5	10.1523/JNEUROSCI.2132-20.2020	https://www.scopus.com/inward/record.uri?eid=2-s2.0-85100280388&doi=10.1523%2fJNEUROSCI.2132-20.2020&partnerID=40&md5=2f91fce8c31e1dc6bce865f0bedb6ac3		Article	Final	All Open Access, Bronze, Green	Scopus	2-s2.0-85100280388
33395525	Cannabichromene, Related Phytocannabinoids, and 5-Fluoro-cannabichromene Have Anticonvulsant Properties in a Mouse Model of Dravet Syndrome	2021	Anderson L.L., Ametovski A., Lin Luo J., Everett-Morgan D., McGregor I.S., Banister S.D., Arnold J.C.	ACS Chemical Neuroscience	12	2		330	339		4	10.1021/acschemneuro.0c00677	https://www.scopus.com/inward/record.uri?eid=2-s2.0-85099655399&doi=10.1021%2facschemneuro.0c00677&partnerID=40&md5=2abe222f134a95bb7924a2cae77b9218		Article	Final		Scopus	2-s2.0-85099655399
33069731	Atypical myelinogenesis and reduced axon caliber in the Scn1a variant model of Dravet syndrome: An electron microscopy pilot study of the developing and mature mouse corpus callosum	2021	Richards K., Jancovski N., Hanssen E., Connelly A., Petrou S.	Brain Research	1751		147157					10.1016/j.brainres.2020.147157	https://www.scopus.com/inward/record.uri?eid=2-s2.0-85094917446&doi=10.1016%2fj.brainres.2020.147157&partnerID=40&md5=a99295782c0f1f076861a8a62cc6e01d		Article	Final		Scopus	2-s2.0-85094917446
	Association Between SCN1A rs2298771, SCN1A rs10188577, SCN2A rs17183814, and SCN2A rs2304016 Polymorphisms and Responsiveness to Antiepileptic Drugs: A Meta-Analysis	2021	Li M., Zhong R., Lu Y., Zhao Q., Li G., Lin W.	Frontiers in Neurology	11		591828					10.3389/fneur.2020.591828	https://www.scopus.com/inward/record.uri?eid=2-s2.0-85102013012&doi=10.3389%2ffneur.2020.591828&partnerID=40&md5=b6640e6cf684ae7b04e4db6240c52308		Review	Final	All Open Access, Gold, Green	Scopus	2-s2.0-85102013012
	Comorbid Bipolar Disorder and Migraine: From Mechanisms to Treatment	2021	Duan J., Yang R., Lu W., Zhao L., Hu S., Hu C.	Frontiers in Psychiatry	11		560138				1	10.3389/fpsyt.2020.560138	https://www.scopus.com/inward/record.uri?eid=2-s2.0-85099757020&doi=10.3389%2ffpsyt.2020.560138&partnerID=40&md5=502033a97bb256ee9bc75819b456aa31		Review	Final	All Open Access, Gold, Green	Scopus	2-s2.0-85099757020
33411788	Aberrant regulation of a poison exon caused by a non-coding variant in a mouse model of Scn1a-associated epileptic encephalopathy	2021	Voskobiynyk Y., Battu G., Felker S.A., Cochran J.N., Newton M.P., Lambert L.J., Kesterson R.A., Myers R.M., Cooper G.M., Roberson E.D., Barsh G.S.	PLoS Genetics	17	1	e1009195				2	10.1371/journal.pgen.1009195	https://www.scopus.com/inward/record.uri?eid=2-s2.0-85099853193&doi=10.1371%2fjournal.pgen.1009195&partnerID=40&md5=a058b96acbd3ccc97dc32a2bfa95b040		Article	Final	All Open Access, Gold, Green	Scopus	2-s2.0-85099853193
33411776	The dose makes the poison—Novel insights into Dravet syndrome and SCN1A regulation through nonproductive splicing	2021	Helbig I., Goldberg E.	PLoS Genetics	17	1					1	10.1371/journal.pgen.1009214	https://www.scopus.com/inward/record.uri?eid=2-s2.0-85099822593&doi=10.1371%2fjournal.pgen.1009214&partnerID=40&md5=ec3944d4fd57674893a95fbc963507fc		Review	Final	All Open Access, Gold, Green	Scopus	2-s2.0-85099822593
	Genomic analysis of “microphenotypes” in epilepsy	2021	Stanley K., Hostyk J., Tran L., Amengual-Gual M., Dugan P., Clark J., Choi H., Tchapyjnikov D., Perucca P., Fernandes C., Andrade D., Devinsky O., Cavalleri G.L., Depondt C., Sen A., O'Brien T., Heinzen E., Loddenkemper T., Goldstein D.B., Mikati M.A., Delanty N., Adcock J., Andrade D., Brazil C., Cavalleri G., Choi H., Costello D., Delanty N., Depondt C., Dugan P., Goldstein D., Heinzen E., Lewi…	American Journal of Medical Genetics, Part A								10.1002/ajmg.a.62505	https://www.scopus.com/inward/record.uri?eid=2-s2.0-85116783520&doi=10.1002%2fajmg.a.62505&partnerID=40&md5=f8b9a4b3968cbf4af286a6f79c742746		Article	Article in Press	All Open Access, Hybrid Gold	Scopus	2-s2.0-85116783520
34379890	High FGF-21 level in a cohort of 22 patients with Dravet Syndrome—Possible relationship with the disease outcomes	2021	Kwong A.K.-Y., Wong V.C.-N., Wong S.S.-N., Chu V.L.-Y., Koene S., Smeitink J., Fung C.-W.	Epilepsia Open								10.1002/epi4.12534	https://www.scopus.com/inward/record.uri?eid=2-s2.0-85116059827&doi=10.1002%2fepi4.12534&partnerID=40&md5=f5520a8e3acc14709f62211f1a747170		Article	Article in Press	All Open Access, Gold	Scopus	2-s2.0-85116059827
34384142	Cannabigerolic acid, a major biosynthetic precursor molecule in cannabis, exhibits divergent effects on seizures in mouse models of epilepsy	2021	Anderson L.L., Heblinski M., Absalom N.L., Hawkins N.A., Bowen M.T., Benson M.J., Zhang F., Bahceci D., Doohan P.T., Chebib M., McGregor I.S., Kearney J.A., Arnold J.C.	British Journal of Pharmacology								10.1111/bph.15661	https://www.scopus.com/inward/record.uri?eid=2-s2.0-85115922709&doi=10.1111%2fbph.15661&partnerID=40&md5=7edfd29e4b123ac4a2e2c30040244648		Article	Article in Press	All Open Access, Hybrid Gold	Scopus	2-s2.0-85115922709
	Soticlestat, a novel cholesterol 24-hydroxylase inhibitor, reduces seizures and premature death in Dravet syndrome mice	2021	Hawkins N.A., Jurado M., Thaxton T.T., Duarte S.E., Barse L., Tatsukawa T., Yamakawa K., Nishi T., Kondo S., Miyamoto M., Abrahams B.S., During M.J., Kearney J.A.	Epilepsia								10.1111/epi.17062	https://www.scopus.com/inward/record.uri?eid=2-s2.0-85114690319&doi=10.1111%2fepi.17062&partnerID=40&md5=0a447f0ec323f036f10eccf9584ee776		Article	Article in Press	All Open Access, Hybrid Gold	Scopus	2-s2.0-85114690319
	Effect and mechanism of carbamazepine on SCN1A expression in temporal lobe epilepsy rats	2021	Zhang L., Feng Y.J., Li W., Yi Y.J., Wang J., Wang X.Y.	Indian Journal of Pharmaceutical Sciences	83			68	72			10.36468/pharmaceutical-sciences.spl.253	https://www.scopus.com/inward/record.uri?eid=2-s2.0-85114463790&doi=10.36468%2fpharmaceutical-sciences.spl.253&partnerID=40&md5=73812c714af6f8462886f0855e573d89		Article	Final	All Open Access, Bronze	Scopus	2-s2.0-85114463790
	Late diagnoses of Dravet syndrome: How many individuals are we missing?	2021	Silvennoinen K., Puvirajasinghe C., Hudgell K., Sidhu M.K., Martins Custodio H., Jones W.D., Balestrini S., Sisodiya S.M., Ambrose J.C., Arumugam P., Baple E.L., Bleda M., Boardman-Pretty F., Boissiere J.M., Boustred C.R., Caulfield M.J., Chan G.C., Craig C.E.H., Daugherty L.C., de Burca A., Devereau A., Elgar G., Foulger R.E., Fowler T., Furió-Tarí P., Hackett J.M., Halai D., Hamblin A., Henders…	Epilepsia Open								10.1002/epi4.12525	https://www.scopus.com/inward/record.uri?eid=2-s2.0-85112614764&doi=10.1002%2fepi4.12525&partnerID=40&md5=4272a73a70bb3cc4616fab4756fad504		Article	Article in Press	All Open Access, Gold, Green	Scopus	2-s2.0-85112614764
	Dravet Syndrome: Novel Approaches for the Most Common Genetic Epilepsy	2021	Isom L.L., Knupp K.G.	Neurotherapeutics								10.1007/s13311-021-01095-6	https://www.scopus.com/inward/record.uri?eid=2-s2.0-85112153856&doi=10.1007%2fs13311-021-01095-6&partnerID=40&md5=b61f94fab1c224e93021fee7410ed21c		Review	Article in Press		Scopus	2-s2.0-85112153856
	The structure of hereditary and congenital pathology in a multidisciplinary specialized pediatric clinic: Personalized approach to diagnostics	2021	Kozhanova T.V., Zhilina S.S., Mescheryakova T.I., Lukash E.N., Markova S.I., Zavadenko N.N., Prityko A.G.	Pediatriya - Zhurnal im G.N. Speranskogo	100	2		204	210			10.24110/0031-403X-2021-100-2-204-210	https://www.scopus.com/inward/record.uri?eid=2-s2.0-85111429999&doi=10.24110%2f0031-403X-2021-100-2-204-210&partnerID=40&md5=86287173230261a1c651df7a800004fb		Article	Final		Scopus	2-s2.0-85111429999
	Imaging Interneuron Impairment in Ictogenesis: A Spatiotemporal Sweet Spot of Seizure Sampling in Scn1a+/−	2021	Lillis K.P.	Epilepsy Currents								10.1177/15357597211032045	https://www.scopus.com/inward/record.uri?eid=2-s2.0-85111382758&doi=10.1177%2f15357597211032045&partnerID=40&md5=7e3a8488e2afb37631372f94ad029112		Article	Article in Press	All Open Access, Gold	Scopus	2-s2.0-85111382758
	What is new in dravet syndrome?	2021	Sur L.M., Gaga R., Samasca G., Aldea C., Sur G., Lupan I.	Romanian Journal of Neurology/ Revista Romana de Neurologie	20	2		135	137			10.37897/RJN.2021.2.2	https://www.scopus.com/inward/record.uri?eid=2-s2.0-85110647376&doi=10.37897%2fRJN.2021.2.2&partnerID=40&md5=85e91b01673b544a5bb779647a943b55		Review	Final	All Open Access, Gold	Scopus	2-s2.0-85110647376
	Epileptic encephalopathies in children with autistic spectrum disorders: From molecular genetic diagnostics to target therapy	2021	Kyrylova L., Miroshnykov A., Yuzva A.	Psychiatry, Psychotherapy and Clinical Psychology	12	2		249	259			10.34883/PI.2021.12.2.006	https://www.scopus.com/inward/record.uri?eid=2-s2.0-85108176990&doi=10.34883%2fPI.2021.12.2.006&partnerID=40&md5=ddf099156ebc5957ae3ba91648808618		Article	Final		Scopus	2-s2.0-85108176990
34045209	Enhanced synaptic transmission in the extended amygdala and altered excitability in an extended amygdala to brainstem circuit in a dravet syndrome mouse model	2021	Yan W.W., Xia M., Chiang J., Levitt A., Hawkins N., Kearney J., Swanson G.T., Chetkovich D., Nobis W.P.	eNeuro	8	3	ENEURO.0306-20.2021				1	10.1523/ENEURO.0306-20.2021	https://www.scopus.com/inward/record.uri?eid=2-s2.0-85108071254&doi=10.1523%2fENEURO.0306-20.2021&partnerID=40&md5=dd00ec1b6c18a271deda38bfcf35b00a		Article	Final	All Open Access, Gold, Green	Scopus	2-s2.0-85108071254
	Genetics and gene therapy in Dravet syndrome	2021	Higurashi N., Broccoli V., Hirose S.	Epilepsy and Behavior			108043					10.1016/j.yebeh.2021.108043	https://www.scopus.com/inward/record.uri?eid=2-s2.0-85107118963&doi=10.1016%2fj.yebeh.2021.108043&partnerID=40&md5=55ecef35efee1adc107fddbb93450ed4		Review	Article in Press		Scopus	2-s2.0-85107118963
	PCDH19-Related Epilepsies	2021	Mazzurco M., Pulvirenti G., Caccamo M., Presti S., Soma R., Salafia S., Praticò E.R., Filosco F., Falsaperla R., Praticò A.D.	Journal of Pediatric Neurology								10.1055/s-0041-1728641	https://www.scopus.com/inward/record.uri?eid=2-s2.0-85106998186&doi=10.1055%2fs-0041-1728641&partnerID=40&md5=b6372fd7f17d2790dbe11780380cb201		Review	Article in Press		Scopus	2-s2.0-85106998186
	Voltage gated sodium ion channel and epilepsy	2021	Ishii A.	No To Hattatsu	53	1		5	9			10.11251/ojjscn.53.5	https://www.scopus.com/inward/record.uri?eid=2-s2.0-85105811828&doi=10.11251%2fojjscn.53.5&partnerID=40&md5=ad9c50b39dd4b5cb7dbab9dfb946db16		Article	Final		Scopus	2-s2.0-85105811828
	Exploring the hereditary nature of migraine	2021	Bron C., Sutherland H.G., Griffiths L.R.	Neuropsychiatric Disease and Treatment	17			1183	1194		3	10.2147/NDT.S282562	https://www.scopus.com/inward/record.uri?eid=2-s2.0-85105485804&doi=10.2147%2fNDT.S282562&partnerID=40&md5=cec3a6c89a8237009557c4de00d1e58a		Review	Final	All Open Access, Gold, Green	Scopus	2-s2.0-85105485804
	SCN1B gene: A close relative to SCN1A	2021	Pasquetti E., Bianco M.L., Sullo F., Patanè F., Sciuto L., Polizzi A., Praticò A.D., Zanghì A., Falsaperla R.	Journal of Pediatric Neurology								10.1055/s-0041-1727268	https://www.scopus.com/inward/record.uri?eid=2-s2.0-85104334587&doi=10.1055%2fs-0041-1727268&partnerID=40&md5=020d023394b7f331eaf5595455a3ec4c		Review	Article in Press		Scopus	2-s2.0-85104334587
	SCN1A and its related epileptic phenotypes	2021	Sullo F., Pasquetti E., Patanè F., Bianco M.L., Marino S.D., Polizzi A., Falsaperla R., Ruggieri M., Zanghì A., Praticó A.D.	Journal of Pediatric Neurology								10.1055/s-0041-1727260	https://www.scopus.com/inward/record.uri?eid=2-s2.0-85104294281&doi=10.1055%2fs-0041-1727260&partnerID=40&md5=2b37ca2ace5241f649e147df08a0a6ee		Review	Article in Press		Scopus	2-s2.0-85104294281
	Phenotypic spectrum and genomics of undiagnosed arthrogryposis multiplex congenita	2021	Laquerriere A., Jaber D., Abiusi E., Maluenda J., Mejlachowicz D., Vivanti A., Dieterich K., Stoeva R., Quevarec L., Nolent F., Biancalana V., Latour P., Sternberg D., Capri Y., Verloes A., Bessieres B., Loeuillet L., Attie-Bitach T., Martinovic J., Blesson S., Petit F., Beneteau C., Whalen S., Marguet F., Bouligand J., Héron D., Viot G., Amiel J., Amram D., Bellesme C., Bucourt M., Faivre L., Jo…	Journal of Medical Genetics			jmedgenet-2020-107595				2	10.1136/jmedgenet-2020-107595	https://www.scopus.com/inward/record.uri?eid=2-s2.0-85103773885&doi=10.1136%2fjmedgenet-2020-107595&partnerID=40&md5=c11086dac6d669ba7ae434e6f2a672de		Article	Article in Press	All Open Access, Hybrid Gold, Green	Scopus	2-s2.0-85103773885
33728858	Experience in the management of patients with genetic epilepsies and epileptic encephalopathies in the outpatient practice	2021	Rakhmanina O.A., Volkov I.V., Shestakova O.I., Tomenko T.R., Paniukova I.V., Volkova O.K., Belyaev O.V., Omelchenko N.N., Lebedev I.A.	Zhurnal Nevrologii i Psihiatrii imeni S.S. Korsakova	121	2		99	105			10.17116/jnevro202112102199	https://www.scopus.com/inward/record.uri?eid=2-s2.0-85103228901&doi=10.17116%2fjnevro202112102199&partnerID=40&md5=092c800dd3ad4263a37ba1e85226b4e5		Article	Final		Scopus	2-s2.0-85103228901
33460646	Cryptic prokaryotic promoters explain instability of recombinant neuronal sodium channels in bacteria	2021	DeKeyser J.-M., Thompson C.H., George A.L., Jr.	Journal of Biological Chemistry	296		100298				1	10.1016/j.jbc.2021.100298	https://www.scopus.com/inward/record.uri?eid=2-s2.0-85102949827&doi=10.1016%2fj.jbc.2021.100298&partnerID=40&md5=fa8c8afe901f5347533268c2d84ee885		Article	Final	All Open Access, Gold, Green	Scopus	2-s2.0-85102949827
33712547	Comparative structural analysis of human Nav1.1 and Nav1.5 reveals mutational hotspots for sodium channelopathies	2021	Pan X., Li Z., Jin X., Zhao Y., Huang G., Huang X., Shen Z., Cao Y., Dong M., Lei J., Yan N.	Proceedings of the National Academy of Sciences of the United States of America	118	11	e2100066118				4	10.1073/PNAS.2100066118	https://www.scopus.com/inward/record.uri?eid=2-s2.0-85102916463&doi=10.1073%2fPNAS.2100066118&partnerID=40&md5=60cb0b99f25c188e6ab98a15211fb251		Article	Final	All Open Access, Bronze, Green	Scopus	2-s2.0-85102916463
33645379	Safety considerations selecting antiseizure medications for the treatment of individuals with Dravet syndrome	2021	Nabbout R., Chemaly N., Chiron C., Kuchenbuch M.	Expert Opinion on Drug Safety	20	5		561	576			10.1080/14740338.2021.1890025	https://www.scopus.com/inward/record.uri?eid=2-s2.0-85101884590&doi=10.1080%2f14740338.2021.1890025&partnerID=40&md5=39a98efbeb5a8a03369c8bf4f97d0443		Review	Final		Scopus	2-s2.0-85101884590
33455486	A critical evaluation of fenfluramine hydrochloride for the treatment of Dravet syndrome	2021	Schoonjans A.-S., Ceulemans B.	Expert Review of Neurotherapeutics								10.1080/14737175.2021.1877540	https://www.scopus.com/inward/record.uri?eid=2-s2.0-85101869030&doi=10.1080%2f14737175.2021.1877540&partnerID=40&md5=211d5531d388b1d088bdb9390167fc5d		Article	Article in Press		Scopus	2-s2.0-85101869030
33340487	Epilepsy in 2020—a new dawn	2021	Cross J.H.	The Lancet Neurology	20	1		8	10		1	10.1016/S1474-4422(20)30438-5	https://www.scopus.com/inward/record.uri?eid=2-s2.0-85097732733&doi=10.1016%2fS1474-4422%2820%2930438-5&partnerID=40&md5=3dff54f4e30d560adfc88bdf18a6ecca		Note	Final		Scopus	2-s2.0-85097732733
33275464	Advances in the design and discovery of novel small molecule drugs for the treatment of Dravet Syndrome	2021	Miziak B., Czuczwar S.	Expert Opinion on Drug Discovery	16	5		579	593			10.1080/17460441.2021.1857722	https://www.scopus.com/inward/record.uri?eid=2-s2.0-85097600793&doi=10.1080%2f17460441.2021.1857722&partnerID=40&md5=c6930ae402dcfa6c333988e3ae1b4655		Review	Final		Scopus	2-s2.0-85097600793
33271326	Developmental alterations in firing properties of hippocampal CA1 inhibitory and excitatory neurons in a mouse model of Dravet syndrome	2021	Almog Y., Fadila S., Brusel M., Mavashov A., Anderson K., Rubinstein M.	Neurobiology of Disease	148		105209				2	10.1016/j.nbd.2020.105209	https://www.scopus.com/inward/record.uri?eid=2-s2.0-85097469671&doi=10.1016%2fj.nbd.2020.105209&partnerID=40&md5=634f05d5755f1f68c2485340c2505ee8		Article	Final	All Open Access, Gold	Scopus	2-s2.0-85097469671
	The Heated Relationship Between Neural Activity and Seizures	2021	Weston M.C.	Epilepsy Currents	21	1		62	63			10.1177/1535759720976371	https://www.scopus.com/inward/record.uri?eid=2-s2.0-85097319206&doi=10.1177%2f1535759720976371&partnerID=40&md5=385d932249e1dc2f1161ce09693e3014		Article	Final	All Open Access, Gold, Green	Scopus	2-s2.0-85097319206
	TANGO With SCN1A: Can This Molecular Dance Defeat Dravet Syndrome?	2021	Wagnon J.L.	Epilepsy Currents	21	1		60	61			10.1177/1535759720975750	https://www.scopus.com/inward/record.uri?eid=2-s2.0-85097105308&doi=10.1177%2f1535759720975750&partnerID=40&md5=337a2d7ffd28399094953c2538a055eb		Article	Final	All Open Access, Gold, Green	Scopus	2-s2.0-85097105308
33278787	High genetic burden in 163 Chinese children with status epilepticus	2021	Wang T., Wa ng J., Ma Y., Zhou H., Ding D., Li C., Du X., Jiang Y.-H., Wang Y., Long S., Li S., Lu G., Chen W., Zhou Y., Zhou S.	Seizure	84			40	46			10.1016/j.seizure.2020.10.032	https://www.scopus.com/inward/record.uri?eid=2-s2.0-85096953943&doi=10.1016%2fj.seizure.2020.10.032&partnerID=40&md5=d7ce33994246938ab5fd8477d6a7567e		Article	Final		Scopus	2-s2.0-85096953943
33189882	Nanoparticle encapsulated oxytocin increases resistance to induced seizures and restores social behavior in Scn1a-derived epilepsy	2021	Wong J.C., Shapiro L., Thelin J.T., Heaton E.C., Zaman R.U., D'Souza M.J., Murnane K.S., Escayg A.	Neurobiology of Disease	147		105147				2	10.1016/j.nbd.2020.105147	https://www.scopus.com/inward/record.uri?eid=2-s2.0-85096182841&doi=10.1016%2fj.nbd.2020.105147&partnerID=40&md5=c8b131ad3ff41861dd1ff06fe49113f7		Article	Final	All Open Access, Gold, Green	Scopus	2-s2.0-85096182841
33144172	Disordered autonomic function during exposure to moderate heat or exercise in a mouse model of Dravet syndrome	2021	Sahai N., Bard A.M., Devinsky O., Kalume F.	Neurobiology of Disease	147		105154				1	10.1016/j.nbd.2020.105154	https://www.scopus.com/inward/record.uri?eid=2-s2.0-85095431705&doi=10.1016%2fj.nbd.2020.105154&partnerID=40&md5=5c8e63667103806ffd92f90c5cf5ad7d		Article	Final	All Open Access, Gold, Green	Scopus	2-s2.0-85095431705
	SCN1A IVS5N+5 G>A Polymorphism and Risk of Febrile Seizure and Epilepsy: A Systematic Review and Meta-Analysis	2020	Hao J., Liu H., Ma J., Liu G., Dong G., Liu P., Xiao F.	Frontiers in Neurology	11		581539					10.3389/fneur.2020.581539	https://www.scopus.com/inward/record.uri?eid=2-s2.0-85098560643&doi=10.3389%2ffneur.2020.581539&partnerID=40&md5=27f1a02619ff29e47d49f8dc1a2c269f		Review	Final	All Open Access, Gold, Green	Scopus	2-s2.0-85098560643
	A wide spectrum of genetic disorders causing severe childhood epilepsy in Taiwan: A case series of ultrarare genetic cause and novel mutation analysis in a pilot study	2020	Hong S.-Y., Yang J.-J., Li S.-Y., Lee I.-C.	Journal of Personalized Medicine	10	4	281	1	15		2	10.3390/jpm10040281	https://www.scopus.com/inward/record.uri?eid=2-s2.0-85098135334&doi=10.3390%2fjpm10040281&partnerID=40&md5=4ddae13fc6bfcda47865313e8b5bef96		Article	Final	All Open Access, Gold, Green	Scopus	2-s2.0-85098135334
33370868	Generation of iPSC lines from two patients affected by febrile seizure due to inherited missense mutation in SCN1A gene	2020	Scalise S., Scaramuzzino L., Lucchino V., Esposito C., Malatesta P., Grillone K., Perrotti N., Cuda G., Parrotta E.I.	Stem Cell Research	49		102083				2	10.1016/j.scr.2020.102083	https://www.scopus.com/inward/record.uri?eid=2-s2.0-85097710842&doi=10.1016%2fj.scr.2020.102083&partnerID=40&md5=ac5af3386ffbc2f1c0c462514aa5fc32		Article	Final	All Open Access, Gold	Scopus	2-s2.0-85097710842
33189042	A heterozygous SCN1A (c.A5768G/+) mutant human induced pluripotent stem cell line (USTCi002-A) generated using TALEN-mediated precise gene editing	2020	Zhao H., Li S., Lin Z., He L., Deng W., Han X., Tang F., Cheng N., Zhou P., Huang R., Deng S., Huang J., Li Z.	Stem Cell Research	49		102058					10.1016/j.scr.2020.102058	https://www.scopus.com/inward/record.uri?eid=2-s2.0-85096221506&doi=10.1016%2fj.scr.2020.102058&partnerID=40&md5=d73b14981715563fc1fecc7b5b933d3f		Article	Final	All Open Access, Gold	Scopus	2-s2.0-85096221506
33170338	Correction to: Genes associated with survival of female bovine blastocysts produced in vivo (Cell and Tissue Research, (2020), 382, 3, (665-678), 10.1007/s00441-020-03257-y)	2020	Zolini A.M., Block J., Rabaglino M.B., Rincon G., Hoelker M., Bromfield J.J., Salilew-Wondim D., Hansen P.J.	Cell and Tissue Research	382	3		679				10.1007/s00441-020-03293-8	https://www.scopus.com/inward/record.uri?eid=2-s2.0-85095743365&doi=10.1007%2fs00441-020-03293-8&partnerID=40&md5=8010c59fbf24398b5f8cc374c8e99df6		Erratum	Final	All Open Access, Bronze	Scopus	2-s2.0-85095743365
33045260	Scn1a and Cacna1a mutations mutually alter their original phenotypes in rats	2020	Ohmori I., Kobayashi K., Ouchida M.	Neurochemistry International	141		104859				1	10.1016/j.neuint.2020.104859	https://www.scopus.com/inward/record.uri?eid=2-s2.0-85093975919&doi=10.1016%2fj.neuint.2020.104859&partnerID=40&md5=720ab18c08cdd366d0b693d8d91b3a6e		Article	Final	All Open Access, Hybrid Gold, Green	Scopus	2-s2.0-85093975919
33096315	Effects of SCN1A and SCN2A polymorphisms on responsiveness to valproic acid monotherapy in epileptic children	2020	Liu M., Mao J., Xu H., Wang J., Zhao P., Xu Q., Du Z.	Epilepsy Research	168		106485				1	10.1016/j.eplepsyres.2020.106485	https://www.scopus.com/inward/record.uri?eid=2-s2.0-85093694814&doi=10.1016%2fj.eplepsyres.2020.106485&partnerID=40&md5=1c2db5ef8535b9c1d17e376dce768a23		Article	Final	All Open Access, Hybrid Gold	Scopus	2-s2.0-85093694814
33099130	Testing broad-spectrum and isoform-preferring HCN channel blockers for anticonvulsant properties in mice	2020	Kharouf Q., Pinares-Garcia P., Romanelli M.N., Reid C.A.	Epilepsy Research	168		106484				2	10.1016/j.eplepsyres.2020.106484	https://www.scopus.com/inward/record.uri?eid=2-s2.0-85093660514&doi=10.1016%2fj.eplepsyres.2020.106484&partnerID=40&md5=1c100d6cedde9fd0930f0ba0a3f24830		Article	Final	All Open Access, Green	Scopus	2-s2.0-85093660514
32807948	Viral manipulation of functionally distinct interneurons in mice, non-human primates and humans	2020	Vormstein-Schneider D., Lin J.D., Pelkey K.A., Chittajallu R., Guo B., Arias-Garcia M.A., Allaway K., Sakopoulos S., Schneider G., Stevenson O., Vergara J., Sharma J., Zhang Q., Franken T.P., Smith J., Ibrahim L.A., M astro K.J., Sabri E., Huang S., Favuzzi E., Burbridge T., Xu Q., Guo L., Vogel I., Sanchez V., Saldi G.A., Gorissen B.L., Yuan X., Zaghloul K.A., Devinsky O., Sabatini B.L., Batista…	Nature Neuroscience	23	12		1629	1636		21	10.1038/s41593-020-0692-9	https://www.scopus.com/inward/record.uri?eid=2-s2.0-85089867328&doi=10.1038%2fs41593-020-0692-9&partnerID=40&md5=8bd79878c6afc90cec3f69cc348ca967		Article	Final	All Open Access, Green	Scopus	2-s2.0-85089867328
32773773	A longitudinal footprint of genetic epilepsies using automated electronic medical record interpretation	2020	Ganesan S., Galer P.D., Helbig K.L., McKeown S.E., O’Brien M., Gonzalez A.K., Felmeister A.S., Khankhanian P., Ellis C.A., Helbig I.	Genetics in Medicine	22	12		2060	2070		7	10.1038/s41436-020-0923-1	https://www.scopus.com/inward/record.uri?eid=2-s2.0-85089144675&doi=10.1038%2fs41436-020-0923-1&partnerID=40&md5=5540568580d99edc5d3b37e730a0647e		Article	Final	All Open Access, Hybrid Gold	Scopus	2-s2.0-85089144675
32581296	A Study among the Genotype, Functional Alternations, and Phenotype of 9 SCN1A Mutations in Epilepsy Patients	2020	Kluckova D., Kolnikova M., Lacinova L., Jurkovicova-Tarabova B., Foltan T., Demko V., Kadasi L., Ficek A., Soltysova A.	Scientific Reports	10	1	10288				3	10.1038/s41598-020-67215-y	https://www.scopus.com/inward/record.uri?eid=2-s2.0-85087067155&doi=10.1038%2fs41598-020-67215-y&partnerID=40&md5=72450da6b9a7ef9d48fdd51b92f5e3de		Article	Final	All Open Access, Gold, Green	Scopus	2-s2.0-85087067155
32615329	Poison exons in neurodevelopment and disease	2020	Carvill G.L., Mefford H.C.	Current Opinion in Genetics and Development	65			98	102		1	10.1016/j.gde.2020.05.030	https://www.scopus.com/inward/record.uri?eid=2-s2.0-85086927089&doi=10.1016%2fj.gde.2020.05.030&partnerID=40&md5=e49a5815cd8b5f8b04fb9712214e3af8		Review	Final		Scopus	2-s2.0-85086927089
31575436	Rufinamide efficacy and association with phenotype and genotype in children with intractable epilepsy: A retrospective single center study	2020	Oesch G., Bozarth X.L.	Epilepsy Research	168		106211				3	10.1016/j.eplepsyres.2019.106211	https://www.scopus.com/inward/record.uri?eid=2-s2.0-85072690370&doi=10.1016%2fj.eplepsyres.2019.106211&partnerID=40&md5=aea97707ad6872302c005ba1fbcf2e09		Article	Final		Scopus	2-s2.0-85072690370
33216760	No association between SCN9A and monogenic human epilepsy disorders	2020	Fasham J., Leslie J.S., Harrison J.W., Deline J., Williams K.B., Kuhl A., Schwoerer J.S., Cross H.E., Crosby A.H., Baple E.L.	PLoS Genetics	16	11	e1009161				1	10.1371/journal.pgen.1009161	https://www.scopus.com/inward/record.uri?eid=2-s2.0-85097156765&doi=10.1371%2fjournal.pgen.1009161&partnerID=40&md5=c68f8ecd0ff5b2dc53bb6c74e8157bf8		Article	Final	All Open Access, Gold, Green	Scopus	2-s2.0-85097156765
	Fatal status epilepticus in dravet syndrome	2020	Liso P.D., Pironi V., Mastrangelo M., Battaglia D., Craiu D., Trivisano M., Specchio N., Nabbout R., Vigevano F.	Brain Sciences	10	11	889	1	9		3	10.3390/brainsci10110889	https://www.scopus.com/inward/record.uri?eid=2-s2.0-85096554662&doi=10.3390%2fbrainsci10110889&partnerID=40&md5=6c3e10889ebd4d22ba6da3aef8780bde		Article	Final	All Open Access, Gold, Green	Scopus	2-s2.0-85096554662
33084037	Starting stiripentol in adults with Dravet syndrome? Watch for ammonia and carnitine	2020	Zulfiqar Ali Q., Marques P., Selvarajah A., Tabarestani S., Sadoway T., Andrade D.M.	Epilepsia	61	11		2435	2441		3	10.1111/epi.16684	https://www.scopus.com/inward/record.uri?eid=2-s2.0-85092896342&doi=10.1111%2fepi.16684&partnerID=40&md5=ae422f318184000e3035104c045ee59d		Article	Final		Scopus	2-s2.0-85092896342
	Hemiplegic Migraine in Glut1 Deficiency Syndrome and Paroxysmal Dyskinesia at Ketogenic Diet Induction: Case Report and Literature Review	2020	Gburek-Augustat J., Heinze A., Abou Jamra R., Merkenschlager A.	Movement Disorders Clinical Practice	7	8		965	970		2	10.1002/mdc3.13087	https://www.scopus.com/inward/record.uri?eid=2-s2.0-85092132257&doi=10.1002%2fmdc3.13087&partnerID=40&md5=84b9a06a21306bd7787d2750eab430b9		Review	Final	All Open Access, Hybrid Gold, Green	Scopus	2-s2.0-85092132257
	Slower, Fewer Hippocampal Ripples in Loss-of-Function Model of Dravet Syndrome	2020	Ahmed O.J.	Epilepsy Currents	20	6		387	389			10.1177/1535759720960470	https://www.scopus.com/inward/record.uri?eid=2-s2.0-85091682410&doi=10.1177%2f1535759720960470&partnerID=40&md5=82f0ccf279005d80a94705a0c78f73f7		Article	Final	All Open Access, Gold, Green	Scopus	2-s2.0-85091682410
32979291	Excitatory and inhibitory neuron defects in a mouse model of Scn1b-linked EIEE52	2020	Hull J.M., O’Malley H.A., Chen C., Yuan Y., Denomme N., Bouza A.A., Anumonwo C., Lopez-Santiago L.F., Isom L.L.	Annals of Clinical and Translational Neurology	7	11		2137	2149		2	10.1002/acn3.51205	https://www.scopus.com/inward/record.uri?eid=2-s2.0-85091452237&doi=10.1002%2facn3.51205&partnerID=40&md5=b395fdf2cd28d550db7a3e59c254e808		Article	Final	All Open Access, Gold, Green	Scopus	2-s2.0-85091452237
32945537	Efficacy and safety of Fenfluramine hydrochloride for the treatment of seizures in Dravet syndrome: A real-world study	2020	Specchio N., Pietrafusa N., Doccini V., Trivisano M., Darra F., Ragona F., Cossu A., Spolverato S., Battaglia D., Quintiliani M., Luigia Gambardella M., Rosati A., Mei D., Granata T., Dalla Bernardina B., Vigevano F., Guerrini R.	Epilepsia	61	11		2405	2414		6	10.1111/epi.16690	https://www.scopus.com/inward/record.uri?eid=2-s2.0-85091034817&doi=10.1111%2fepi.16690&partnerID=40&md5=07bd65caac0d47b844555e868bc92793		Article	Final	All Open Access, Bronze	Scopus	2-s2.0-85091034817
32949224	Sudden death in epilepsy: There is room for intracranial pressure	2020	Dibué M., Spoor J.K.H., Dremmen M., von Saß C.F., Hänggi D., Steiger H.-J., Ryvlin P., Kamp M.A.	Brain and Behavior	10	11	e01838					10.1002/brb3.1838	https://www.scopus.com/inward/record.uri?eid=2-s2.0-85091018304&doi=10.1002%2fbrb3.1838&partnerID=40&md5=5c7857c3f3b7ca1f2c538737800a308a		Review	Final	All Open Access, Gold, Green	Scopus	2-s2.0-85091018304
32394465	A 5-HT1D-receptor agonist protects Dravet syndrome mice from seizure and early death	2020	Hatini P.G., Commons K.G.	European Journal of Neuroscience	52	10		4370	4374		2	10.1111/ejn.14776	https://www.scopus.com/inward/record.uri?eid=2-s2.0-85087177814&doi=10.1111%2fejn.14776&partnerID=40&md5=3eb2226c1fe34ac09618c92c6662b1ef		Article	Final		Scopus	2-s2.0-85087177814
32538476	Focal epilepsy in SCN1A-mutation carrying patients: is there a role for epilepsy surgery?	2020	Vezyroglou A., Varadkar S., Bast T., Hirsch E., Strobl K., Harvey A.S., Scheffer I.E., Sisodiya S.M., Cross J.H., Devlin A., Hedrich U.B.S., Lerche H., Epilepsy Surgery in SCN1A Study Group	Developmental Medicine and Child Neurology	62	11		1331	1335		2	10.1111/dmcn.14588	https://www.scopus.com/inward/record.uri?eid=2-s2.0-85086438670&doi=10.1111%2fdmcn.14588&partnerID=40&md5=4fa7d1b486701569a0c72df0fd4f719a		Article	Final	All Open Access, Hybrid Gold, Green	Scopus	2-s2.0-85086438670
32335140	A selective NaV1.1 activator with potential for treatment of Dravet syndrome epilepsy	2020	Chow C.Y., Chin Y.K.Y., Ma L., Undheim E.A.B., Herzig V., King G.F.	Biochemical Pharmacology	181		113991				6	10.1016/j.bcp.2020.113991	https://www.scopus.com/inward/record.uri?eid=2-s2.0-85084233618&doi=10.1016%2fj.bcp.2020.113991&partnerID=40&md5=2562153c72e263a2309a509a7d26ec65		Article	Final	All Open Access, Green	Scopus	2-s2.0-85084233618
33126486	Comprehensive Exonic Sequencing of Hemiplegic Migraine-Related Genes in a Cohort of Suspected Probands Identifies Known and Potential Pathogenic Variants	2020	Sutherland H.G., Maksemous N., Albury C.L., Ibrahim O., Smith R.A., Lea R.A., Haupt L.M., Jenkins B., Tsang B., Griffiths L.R.	Cells	9	11					3	10.3390/cells9112368	https://www.scopus.com/inward/record.uri?eid=2-s2.0-85094934246&doi=10.3390%2fcells9112368&partnerID=40&md5=e499246c729d8d09cd14b404523933fb		Article	Final	All Open Access, Gold, Green	Scopus	2-s2.0-85094934246
32897040	Small-fibre pathology has no impact on somatosensory system function in patients with fibromyalgia	2020	Fasolino A., Di Stefano G., Leone C., Galosi E., Gioia C., Lucchino B., Terracciano A., Di Franco M., Cruccu G., Truini A.	Pain	161	10		2385	2393		5	10.1097/j.pain.0000000000001920	https://www.scopus.com/inward/record.uri?eid=2-s2.0-85091470264&doi=10.1097%2fj.pain.0000000000001920&partnerID=40&md5=5a7fcc92a6122c64101eedde7963d974		Article	Final		Scopus	2-s2.0-85091470264
32853554	Semantic Similarity Analysis Reveals Robust Gene-Disease Relationships in Developmental and Epileptic Encephalopathies	2020	Galer P.D., Ganesan S., Lewis-Smith D., McKeown S.E., Pendziwiat M., Helbig K.L., Ellis C.A., Rademacher A., Smith L., Poduri A., Seiffert S., von Spiczak S., Muhle H., van Baalen A., Thomas R.H., Krause R., Weber Y., Helbig I., NCEE Study Group, EPGP Investigators, EuroEPINOMICS-RES Consortium, Genomics Research and Innovation Network	American Journal of Human Genetics	107	4		683	697		5	10.1016/j.ajhg.2020.08.003	https://www.scopus.com/inward/record.uri?eid=2-s2.0-85090591867&doi=10.1016%2fj.ajhg.2020.08.003&partnerID=40&md5=3a1d87fb07f5e7c9f2ae09c2c657b4cb		Article	Final	All Open Access, Hybrid Gold	Scopus	2-s2.0-85090591867
32865826	Convulsive seizures and some behavioral comorbidities are uncoupled in the Scn1aA1783V Dravet syndrome mouse model	2020	Fadila S., Quinn S., Turchetti Maia A., Yakubovich D., Ovadia M., Anderson K.L., Giladi M., Rubinstein M.	Epilepsia	61	10		2289	2300		1	10.1111/epi.16662	https://www.scopus.com/inward/record.uri?eid=2-s2.0-85089986704&doi=10.1111%2fepi.16662&partnerID=40&md5=86fd1811aac7576937916682834f6e31		Article	Final		Scopus	2-s2.0-85089986704
32702657	Molecular diagnosis of epileptic encephalopathy of the first year of life applying a customized gene panel in a group of Argentinean patients	2020	Juanes M., Veneruzzo G., Loos M., Reyes G., Araoz H.V., Garcia F.M., Gomez G., Alonso C.N., Chertkoff L.P., Caraballo R.	Epilepsy and Behavior	111		107322				1	10.1016/j.yebeh.2020.107322	https://www.scopus.com/inward/record.uri?eid=2-s2.0-85088089025&doi=10.1016%2fj.yebeh.2020.107322&partnerID=40&md5=cbf9f8e2ed49ffad6759096f7ac14f55		Article	Final		Scopus	2-s2.0-85088089025
32616899	Gene tests in adults with epilepsy and intellectual disability	2020	Ottman R., Poduri A.	Nature Reviews Neurology	16	10		527	528			10.1038/s41582-020-0388-5	https://www.scopus.com/inward/record.uri?eid=2-s2.0-85087426461&doi=10.1038%2fs41582-020-0388-5&partnerID=40&md5=ed3367c93d351651c9747eec6550e63b		Article	Final		Scopus	2-s2.0-85087426461
32593896	Genotype-phenotype correlates of infantile-onset developmental & epileptic encephalopathy syndromes in South India: A single centre experience	2020	Mitta N., Menon R.N., McTague A., Radhakrishnan A., Sundaram S., Cherian A., Madhavilatha G.K., Mannan A.U., Nampoothiri S., Thomas S.V.	Epilepsy Research	166		106398				3	10.1016/j.eplepsyres.2020.106398	https://www.scopus.com/inward/record.uri?eid=2-s2.0-85086772286&doi=10.1016%2fj.eplepsyres.2020.106398&partnerID=40&md5=7ce81796f27554b5af6ee767651e3e22		Article	Final	All Open Access, Green	Scopus	2-s2.0-85086772286
	Editorial: Experimental & Clinical Epilepsy and Related Comorbidities	2020	Shaikh M.F., Chakraborti A., Ravizza T., O’Brien T.J., Abdullah J.M.	Frontiers in Pharmacology	11		592448					10.3389/fphar.2020.592448	https://www.scopus.com/inward/record.uri?eid=2-s2.0-85091594900&doi=10.3389%2ffphar.2020.592448&partnerID=40&md5=01d16326620130372335271557cd59ef		Editorial	Final	All Open Access, Gold, Green	Scopus	2-s2.0-85091594900
33108073	SCN1A mutation spectrum in a cohort of bulgarian patients with GEFS+ phenotype	2020	Peycheva V., Ivanova N., Kamenarova K., Panova M., Pacheva I., Ivanov I., Bojidarova M., Tacheva G., Stamatov D., Litvinenko I., Hristova D., Deneva D., Rodopska E., Slavkova E., Aleksandrova I., Simeonov E., Dimova P., Bojinova V., Mitev V., Jordanova A., Kaneva R.	Turkish Journal of Pediatrics	62	5		711	725			10.24953/turkjped.2020.05.002	https://www.scopus.com/inward/record.uri?eid=2-s2.0-85094561165&doi=10.24953%2fturkjped.2020.05.002&partnerID=40&md5=2feebb6b4bb694faea7111183dd156b1		Article	Final	All Open Access, Bronze	Scopus	2-s2.0-85094561165
33067208	Genetic Diagnosis of Dravet Syndrome Using Next Generation Sequencing-Based Epilepsy Gene Panel Testing	2020	Lee J., Lee C., Park W.-Y., Lee J.	Annals of clinical and laboratory science	50	5		625	637				https://www.scopus.com/inward/record.uri?eid=2-s2.0-85093705894&partnerID=40&md5=93caa1d139b191ba626f3370938a43d4		Article	Final		Scopus	2-s2.0-85093705894
33399642	Pathogenic variant in the pcdh19 gene in a patient with epilepsy and cognitive disability [Variante patogénica en el gen pcdh19 en una paciente con epilepsia y discapacidad cognitiva]	2020	Silva V.V., Venegas E.G., Gabriela Repetto Lisboa M., Ramos E.B., Badia P.L.	Revista Chilena de Pediatria	91	5		761	766			10.32641/rchped.vi91i5.1490	https://www.scopus.com/inward/record.uri?eid=2-s2.0-85092593658&doi=10.32641%2frchped.vi91i5.1490&partnerID=40&md5=d55a5634bec13415c19677bbdea526fc		Article	Final		Scopus	2-s2.0-85092593658
31686106	Optimization of in silico tools for predicting genetic variants: Individualizing for genes with molecular sub-regional stratification	2020	Tang B., Li B., Gao L.-D., He N., Liu X.-R., Long Y.-S., Zeng Y., Yi Y.-H., Su T., Liao W.-P.	Briefings in Bioinformatics	21	5		1776	1786		7	10.1093/bib/bbz115	https://www.scopus.com/inward/record.uri?eid=2-s2.0-85091806426&doi=10.1093%2fbib%2fbbz115&partnerID=40&md5=812a33a1dc47c28afc3766fb63a1a276		Article	Final		Scopus	2-s2.0-85091806426
	Structure-Function Properties in Sodium Channelopathies: Considerations for Targeted Therapy	2020	Goldman A.	Epilepsy Currents	20	5		303	305			10.1177/1535759720948128	https://www.scopus.com/inward/record.uri?eid=2-s2.0-85089964042&doi=10.1177%2f1535759720948128&partnerID=40&md5=6723ae164fc28699b4dd41b28eb5dd65		Article	Final	All Open Access, Gold, Green	Scopus	2-s2.0-85089964042
32761786	Modulation of GABAergic dysfunction due to SCN1A mutation linked to Hippocampal Sclerosis	2020	Ruffolo G., Martinello K., Labate A., Cifelli P., Fucile S., Di Gennaro G., Quattrone A., Esposito V., Limatola C., Giangaspero F., Aronica E., Palma E., Gambardella A.	Annals of Clinical and Translational Neurology	7	9		1726	1731		1	10.1002/acn3.51150	https://www.scopus.com/inward/record.uri?eid=2-s2.0-85089094425&doi=10.1002%2facn3.51150&partnerID=40&md5=32a3be46feb09b6ebfcad231432dab34		Article	Final	All Open Access, Gold, Green	Scopus	2-s2.0-85089094425
32608111	Interactions between cannabidiol and Δ9-tetrahydrocannabinol in modulating seizure susceptibility and survival in a mouse model of Dravet syndrome	2020	Anderson L.L., Low I.K., McGregor I.S., Arnold J.C.	British Journal of Pharmacology	177	18		4261	4274		7	10.1111/bph.15181	https://www.scopus.com/inward/record.uri?eid=2-s2.0-85088581684&doi=10.1111%2fbph.15181&partnerID=40&md5=4bc74bde6daf148a31420c591fafb7e7		Article	Final	All Open Access, Bronze, Green	Scopus	2-s2.0-85088581684
	Clinical and genetic characteristics of patients with Doose syndrome	2020	Hinokuma N., Nakashima M., Asai H., Nakamura K., Akaboshi S., Fukuoka M., Togawa M., Oana S., Ohno K., Kasai M., Ogawa C., Yamamoto K., Okumiya K., Chong P.F., Kira R., Uchino S., Fukuyama T., Shinagawa T., Miyata Y., Abe Y., Hojo A., Kobayashi K., Maegaki Y., Ishikawa N., Ikeda H., Amamoto M., Mizuguchi T., Iwama K., Itai T., Miyatake S., Saitsu H., Matsumoto N., Kato M.	Epilepsia Open	5	3		442	450		1	10.1002/epi4.12417	https://www.scopus.com/inward/record.uri?eid=2-s2.0-85088377411&doi=10.1002%2fepi4.12417&partnerID=40&md5=cee161b0014010a7c79c90ece9417dc0		Article	Final	All Open Access, Gold, Green	Scopus	2-s2.0-85088377411
32613771	Determining the best candidates for next-generation sequencing-based gene panel for evaluation of early-onset epilepsy	2020	Lee J., Lee C., Ki C.-S., Lee J.	Molecular Genetics and Genomic Medicine	8	9	e1376				3	10.1002/mgg3.1376	https://www.scopus.com/inward/record.uri?eid=2-s2.0-85087305431&doi=10.1002%2fmgg3.1376&partnerID=40&md5=79d75be11062df1d649a520b400b18eb		Article	Final	All Open Access, Gold, Green	Scopus	2-s2.0-85087305431
32585475	Cannabis constituents reduce seizure behavior in chemically-induced and scn1a-mutant zebrafish	2020	Thornton C., Dickson K.E., Carty D.R., Ashpole N.M., Willett K.L.	Epilepsy and Behavior	110		107152				5	10.1016/j.yebeh.2020.107152	https://www.scopus.com/inward/record.uri?eid=2-s2.0-85087061899&doi=10.1016%2fj.yebeh.2020.107152&partnerID=40&md5=8c27734897be2bf92c0bf5c5ad209bf2		Article	Final	All Open Access, Green	Scopus	2-s2.0-85087061899
32544542	Seizing the moment: Zebrafish epilepsy models	2020	Gawel K., Langlois M., Martins T., van der Ent W., Tiraboschi E., Jacmin M., Crawford A.D., Esguerra C.V.	Neuroscience and Biobehavioral Reviews	116			1	20		11	10.1016/j.neubiorev.2020.06.010	https://www.scopus.com/inward/record.uri?eid=2-s2.0-85086722892&doi=10.1016%2fj.neubiorev.2020.06.010&partnerID=40&md5=22b21d6fc22ff9a928fb4e1e1b7cc2a2		Review	Final	All Open Access, Hybrid Gold, Green	Scopus	2-s2.0-85086722892
32086284	Diagnostic exome sequencing in non-acquired focal epilepsies highlights a major role of GATOR1 complex genes	2020	Krenn M., Wagner M., Hotzy C., Graf E., Weber S., Brunet T., Lorenz-Depiereux B., Kasprian G., Aull-Watschinger S., Pataraia E., Stogmann E., Zimprich A., Strom T.M., Meitinger T., Zimprich F.	Journal of Medical Genetics	57	9		624	633		4	10.1136/jmedgenet-2019-106658	https://www.scopus.com/inward/record.uri?eid=2-s2.0-85080949684&doi=10.1136%2fjmedgenet-2019-106658&partnerID=40&md5=8b42c183518db247728ecd53ea6aa88b		Article	Final	All Open Access, Bronze	Scopus	2-s2.0-85080949684
31980564	Higher burden of rare frameshift indels in genes related to synaptic transmission separate familial hemiplegic migraine from common types of migraine	2020	Rasmussen A.H., Olofsson I., Chalmer M.A., Olesen J., Hansen T.F.	Journal of Medical Genetics	57	9		610	616		1	10.1136/jmedgenet-2019-106640	https://www.scopus.com/inward/record.uri?eid=2-s2.0-85078483840&doi=10.1136%2fjmedgenet-2019-106640&partnerID=40&md5=8b2276486c9264b459674f64d33a7ac8		Article	Final	All Open Access, Hybrid Gold	Scopus	2-s2.0-85078483840
	Epilepsy-Related Voltage-Gated Sodium Channelopathies: A Review	2020	Menezes L.F.S., Sabiá Júnior E.F., Tibery D.V., Carneiro L.D.A., Schwartz E.F.	Frontiers in Pharmacology	11		1276				8	10.3389/fphar.2020.01276	https://www.scopus.com/inward/record.uri?eid=2-s2.0-85090218898&doi=10.3389%2ffphar.2020.01276&partnerID=40&md5=5cb6228907f53c542dc2c9efa5ba707c		Review	Final	All Open Access, Gold, Green	Scopus	2-s2.0-85090218898
32848094	Antisense oligonucleotides increase Scn1a expression and reduce seizures and SUDEP incidence in a mouse model of Dravet syndrome	2020	Han Z., Chen C., Christiansen A., Ji S., Lin Q., Anumonwo C., Liu C., Leiser S.C., Meena, Aznarez I., Liau G., Isom L.L.	Science Translational Medicine	12	558	eaaz6100				42	10.1126/SCITRANSLMED.AAZ6100	https://www.scopus.com/inward/record.uri?eid=2-s2.0-85089996049&doi=10.1126%2fSCITRANSLMED.AAZ6100&partnerID=40&md5=b684fe5332f61b508bbeeb83715ff66a		Article	Final		Scopus	2-s2.0-85089996049
32845893	Variable patterns of mutation density among NaV1.1, NaV1.2 and NaV1.6 point to channel-specific functional differences associated with childhood epilepsy	2020	Encinas A.C., Watkins J.C., Longoria I.A., Johnson J.P., Jr., Hammer M.F.	PLoS ONE	15	8-Aug	e0238121				1	10.1371/journal.pone.0238121	https://www.scopus.com/inward/record.uri?eid=2-s2.0-85089960216&doi=10.1371%2fjournal.pone.0238121&partnerID=40&md5=e3aa65f8448383f1ac0d37c5328bc6e0		Article	Final	All Open Access, Gold, Green	Scopus	2-s2.0-85089960216
32554600	Electrophysiological alterations of pyramidal cells and interneurons of the CA1 region of the hippocampus in a novel mouse model of dravet syndrome	2020	Dyment D.A., Schock S.C., Deloughery K., Tran M.H., Ure K., Nutter L.M.J., Creighton A., Yuan J., Banderali U., Comas T., Baumann E., Jezierski A., Boycott K.M., Mackenzie A.E., Martina M., Care4Rare Canada Consortium	Genetics	215	4		1055	1066		2	10.1534/genetics.120.303399	https://www.scopus.com/inward/record.uri?eid=2-s2.0-85089202408&doi=10.1534%2fgenetics.120.303399&partnerID=40&md5=73eb1b51770b353aef311dca81564fec		Article	Final	All Open Access, Green	Scopus	2-s2.0-85089202408
32722525	Next generation sequencing of 134 children with autism spectrum disorder and regression	2020	Yin J., Chun C.-A., Zavadenko N.N., Pechatnikova N.L., Naumova O.Y., Doddapaneni H.V., Hu J., Muzny D.M., Schaaf C.P., Grigorenko E.L.	Genes	11	8	853	1	12		2	10.3390/genes11080853	https://www.scopus.com/inward/record.uri?eid=2-s2.0-85088812350&doi=10.3390%2fgenes11080853&partnerID=40&md5=1d6ff7a0834f81847aa55175435c399c		Article	Final	All Open Access, Gold	Scopus	2-s2.0-85088812350
32659653	Response to: Deng L, Ma A, Wood N, Ardern-Holmes S. Vaccination management in an asymptomatic child with a novel SCN1A variant and family history of status epilepticus following vaccination: A case report on a potential new direction in personalised medicine. Seizure. 2020;78:49-52	2020	Shafrir Y.	Seizure	80			226				10.1016/j.seizure.2020.07.004	https://www.scopus.com/inward/record.uri?eid=2-s2.0-85087704658&doi=10.1016%2fj.seizure.2020.07.004&partnerID=40&md5=746946f33e44685f6ac4e7c260144453		Letter	Final	All Open Access, Bronze	Scopus	2-s2.0-85087704658
32591755	EAN congress highlights challenges — predict, prevent, repair	2020	Marson A.G., Bassetti C.L.A.	Nature Reviews Neurology	16	8		401	402		2	10.1038/s41582-020-0384-9	https://www.scopus.com/inward/record.uri?eid=2-s2.0-85086880543&doi=10.1038%2fs41582-020-0384-9&partnerID=40&md5=7fbd77641895879cd0f1af588c928729		Note	Final	All Open Access, Bronze	Scopus	2-s2.0-85086880543
	Establishment of human induced pluripotent stem cells derived from skin cells of a patient with Dravet syndrome	2020	Kimura Y., Tanaka Y., Shirasu N., Yasunaga S., Higurashi N., Hirose S.	Stem Cell Research	47		101857				1	10.1016/j.scr.2020.101857	https://www.scopus.com/inward/record.uri?eid=2-s2.0-85086846775&doi=10.1016%2fj.scr.2020.101857&partnerID=40&md5=356ade406346be14cc5ed4dd31dc07d5		Article	Final	All Open Access, Gold	Scopus	2-s2.0-85086846775
32473276	Ion Channels Involvement in Neurodevelopmental Disorders	2020	D'Adamo M.C., Liantonio A., Conte E., Pessia M., Imbrici P.	Neuroscience	440			337	359		8	10.1016/j.neuroscience.2020.05.032	https://www.scopus.com/inward/record.uri?eid=2-s2.0-85086259616&doi=10.1016%2fj.neuroscience.2020.05.032&partnerID=40&md5=c2bfdda8830a228452ca979b5e40f3b5		Review	Final		Scopus	2-s2.0-85086259616
32449611	The role of sodium channels in sudden unexpected death in pediatrics	2020	Rochtus A.M., Goldstein R.D., Holm I.A., Brownstein C.A., Pérez-Palma E., Haynes R., Lal D., Poduri A.H.	Molecular Genetics and Genomic Medicine	8	8	e1309				4	10.1002/mgg3.1309	https://www.scopus.com/inward/record.uri?eid=2-s2.0-85085566948&doi=10.1002%2fmgg3.1309&partnerID=40&md5=5c4ce4ba6ddc57660b81cdafd4a73ab6		Article	Final	All Open Access, Gold, Green	Scopus	2-s2.0-85085566948
32414541	Corrigendum to “A single-center, retrospective analysis of genotype–phenotype correlations in children with Dravet syndrome” [Seizure: Eur. J. Epilepsy 75 (2020) 1–6] (Seizure: European Journal of Epilepsy (2020) 75 (1–6), (S1059131119304467), (10.1016/j.seizure.2019.12.009))	2020	Gertler T.S., Calhoun J., Laux L.	Seizure	80			281				10.1016/j.seizure.2020.04.004	https://www.scopus.com/inward/record.uri?eid=2-s2.0-85085086972&doi=10.1016%2fj.seizure.2020.04.004&partnerID=40&md5=8aba329d861a9d61402e5bf5d2f57f61		Erratum	Final	All Open Access, Bronze, Green	Scopus	2-s2.0-85085086972
32336485	Genetic and clinical variations in a Norwegian sample diagnosed with Rett syndrome	2020	Henriksen M.W., Breck H., Sejersted Y., Diseth T., von Tetzchner S., Paus B., Skjeldal O.H.	Brain and Development	42	7		484	495		1	10.1016/j.braindev.2020.03.008	https://www.scopus.com/inward/record.uri?eid=2-s2.0-85083591128&doi=10.1016%2fj.braindev.2020.03.008&partnerID=40&md5=b756dc36fcb9eb34549ff65003d5fc02		Article	Final	All Open Access, Green	Scopus	2-s2.0-85083591128
32005694	Clinical exome sequencing as the first-tier test for diagnosing developmental disorders covering both CNV and SNV: A Chinese cohort	2020	Dong X., Liu B., Yang L., Wang H., Wu B., Liu R., Chen H., Chen X., Yu S., Chen B., Wang S., Xu X., Zhou W., Lu Y.	Journal of Medical Genetics	57	8		558	566		15	10.1136/jmedgenet-2019-106377	https://www.scopus.com/inward/record.uri?eid=2-s2.0-85078941990&doi=10.1136%2fjmedgenet-2019-106377&partnerID=40&md5=c939b078f34972ffdac90b348dad7808		Article	Final	All Open Access, Hybrid Gold	Scopus	2-s2.0-85078941990
	Alterations of the Hippocampal Neurogenic Niche in a Mouse Model of Dravet Syndrome	2020	Martín-Suárez S., Abiega O., Ricobaraza A., Hernandez-Alcoceba R., Encinas J.M.	Frontiers in Cell and Developmental Biology	8		654				3	10.3389/fcell.2020.00654	https://www.scopus.com/inward/record.uri?eid=2-s2.0-85089074296&doi=10.3389%2ffcell.2020.00654&partnerID=40&md5=35576fd57cc631c48fede016d0c1e146		Article	Final	All Open Access, Gold, Green	Scopus	2-s2.0-85089074296
32611630	When development is at stake: Fear the disease, not the vaccine	2020	Joshi C., Thio L.L.	Neurology	95	3		103	104			10.1212/WNL.0000000000009882	https://www.scopus.com/inward/record.uri?eid=2-s2.0-85088493877&doi=10.1212%2fWNL.0000000000009882&partnerID=40&md5=5e836141d653d54c18b535926e4b7a4d		Editorial	Final		Scopus	2-s2.0-85088493877
32276107	Case-control association study of rare nonsynonymous variants of SCN1A and KCNQ2 in acute encephalopathy with biphasic seizures and late reduced diffusion	2020	Shibata A., Kasai M., Terashima H., Hoshino A., Miyagawa T., Kikuchi K., Ishii A., Matsumoto H., Kubota M., Hirose S., Oka A., Mizuguchi M.	Journal of the Neurological Sciences	414		116808					10.1016/j.jns.2020.116808	https://www.scopus.com/inward/record.uri?eid=2-s2.0-85082758894&doi=10.1016%2fj.jns.2020.116808&partnerID=40&md5=757f3ab4d2d6717883ad27d1f3d41be8		Article	Final		Scopus	2-s2.0-85082758894
32709127	Inter-regulation of kv 4.3 and voltage-gated sodium channels underlies predisposition to cardiac and neuronal channelopathies	2020	Clatot J., Neyroud N., Cox R., Souil C., Huang J., Guicheney P., Antzelevitch C.	International Journal of Molecular Sciences	21	14	5057	1	16		2	10.3390/ijms21145057	https://www.scopus.com/inward/record.uri?eid=2-s2.0-85088676536&doi=10.3390%2fijms21145057&partnerID=40&md5=9a08b9bd06648cf6e37fe0595000c02a		Article	Final	All Open Access, Gold, Green	Scopus	2-s2.0-85088676536
32595013	Copy number variation in genetic epilepsy with febrile seizures plus	2020	Fortin O., Vincelette C., Chénier S., Ghais A., Shevell M.I., Simard-Tremblay E., Myers K.A.	European Journal of Paediatric Neurology	27			111	115		2	10.1016/j.ejpn.2020.05.005	https://www.scopus.com/inward/record.uri?eid=2-s2.0-85086917709&doi=10.1016%2fj.ejpn.2020.05.005&partnerID=40&md5=021a469c4e47b709d612f47c5d25f63c		Article	Final		Scopus	2-s2.0-85086917709
32544858	Generation of corrected-hiPSC (USTCi001-A-1) from epilepsy patient iPSCs using TALEN-mediated editing of the SCN1A gene	2020	Zhao H., He L., Li S., Huang H., Tang F., Han X., Lin Z., Tian C., Huang R., Zhou P., Huang J., Deng S., Li Z.	Stem Cell Research	46		101864				3	10.1016/j.scr.2020.101864	https://www.scopus.com/inward/record.uri?eid=2-s2.0-85086325633&doi=10.1016%2fj.scr.2020.101864&partnerID=40&md5=cf5aadf30cebdae43aeb6d6b268a6c2c		Article	Final	All Open Access, Gold	Scopus	2-s2.0-85086325633
	Gene Therapy in Models of Severe Epilepsy due to Sodium Channelopathy	2020	Goldberg E.M.	Epilepsy Currents	20	4		214	217		1	10.1177/1535759720930044	https://www.scopus.com/inward/record.uri?eid=2-s2.0-85086316689&doi=10.1177%2f1535759720930044&partnerID=40&md5=9ffd8b311b020b427852596421bfda4f		Article	Final	All Open Access, Gold, Green	Scopus	2-s2.0-85086316689
32430436	Diagnostic and therapeutic aspects of hemiplegic migraine	2020	Di Stefano V., Rispoli M.G., Pellegrino N., Graziosi A., Rotondo E., Napoli C., Pietrobon D., Pietrobon D., Brighina F., Parisi P.	Journal of Neurology, Neurosurgery and Psychiatry	91	7		764	771		20	10.1136/jnnp-2020-322850	https://www.scopus.com/inward/record.uri?eid=2-s2.0-85085278683&doi=10.1136%2fjnnp-2020-322850&partnerID=40&md5=14ee028521ac9dcf32ad4cfea54e7a21		Review	Final	All Open Access, Hybrid Gold, Green	Scopus	2-s2.0-85085278683
32418750	GABRG2 Deletion Linked to Genetic Epilepsy with Febrile Seizures Plus Affects the Expression of GABAA Receptor Subunits and Other Genes at Different Temperatures	2020	Li X., Guo S., Liu K., Zhang C., Chang H., Yang W., Rong S., Hu Q., Cui J., Wang F., Sun T.	Neuroscience	438			116	136		2	10.1016/j.neuroscience.2020.04.049	https://www.scopus.com/inward/record.uri?eid=2-s2.0-85085040300&doi=10.1016%2fj.neuroscience.2020.04.049&partnerID=40&md5=598ac94ec21579adbb45d7f7d01da818		Article	Final		Scopus	2-s2.0-85085040300
32445790	CRISPR/dCas9-based Scn1a gene activation in inhibitory neurons ameliorates epileptic and behavioral phenotypes of Dravet syndrome model mice	2020	Yamagata T., Raveau M., Kobayashi K., Miyamoto H., Tatsukawa T., Ogiwara I., Itohara S., Hensch T.K., Yamakawa K.	Neurobiology of Disease	141		104954				15	10.1016/j.nbd.2020.104954	https://www.scopus.com/inward/record.uri?eid=2-s2.0-85084976655&doi=10.1016%2fj.nbd.2020.104954&partnerID=40&md5=e41dc14bd4e5a5af49bcdc8e2dbcc7c7		Article	Final	All Open Access, Hybrid Gold	Scopus	2-s2.0-85084976655
32375095	Impact of childhood Dravet syndrome on care givers of patients with DS, a major impact on mothers	2020	Nabbout R., Dirani M., Teng T., Bianic F., Martin M., Holland R., Chemaly N., Coque N.	Epilepsy and Behavior	108		107094				4	10.1016/j.yebeh.2020.107094	https://www.scopus.com/inward/record.uri?eid=2-s2.0-85084072455&doi=10.1016%2fj.yebeh.2020.107094&partnerID=40&md5=22d019511bc3b60901345d2ce1c3b393		Article	Final		Scopus	2-s2.0-85084072455
32227486	Sodium channel epilepsies and neurodevelopmental disorders: from disease mechanisms to clinical application	2020	Brunklaus A., Lal D.	Developmental Medicine and Child Neurology	62	7		784	792		13	10.1111/dmcn.14519	https://www.scopus.com/inward/record.uri?eid=2-s2.0-85082532668&doi=10.1111%2fdmcn.14519&partnerID=40&md5=b874eaaf80ef339a3674940aba17ee0a		Review	Final	All Open Access, Bronze	Scopus	2-s2.0-85082532668
32062735	Novel mutation of SCN9A gene causing generalized epilepsy with febrile seizures plus in a Chinese family	2020	Zhang T., Chen M., Zhu A., Zhang X., Fang T.	Neurological Sciences	41	7		1913	1917		6	10.1007/s10072-020-04284-x	https://www.scopus.com/inward/record.uri?eid=2-s2.0-85079719273&doi=10.1007%2fs10072-020-04284-x&partnerID=40&md5=532f9c74129d2a75cc16612c81d42fe7		Article	Final	All Open Access, Hybrid Gold, Green	Scopus	2-s2.0-85079719273
	Prognosis and follow-up study of 670 pediatric patients with Dravet syndrome [Dravet综合征670例患儿预后随访研究]	2020	Tian X., Zhang Y., Xu X., Yang X., Liu A., Zeng Q., Zhang J., Yang Y., Jiang Y.	Chinese Journal of Applied Clinical Pediatrics	35	12		890	893			10.3760/cma.j.cn101070-20191016-01002	https://www.scopus.com/inward/record.uri?eid=2-s2.0-85089105580&doi=10.3760%2fcma.j.cn101070-20191016-01002&partnerID=40&md5=55533124a6d6597b754a00a3fdc978b0		Article	Final		Scopus	2-s2.0-85089105580
32532910	Successful utilisation of epidural analgesia for perioperative pain management in a child with sodium voltage-gated channel alpha subunit (SCN1A) gene mutation	2020	Sobey J.H., Menser C.C., Reddy S.K., Hughes E.M.	BMJ Case Reports	13	6	e234314					10.1136/bcr-2020-234314	https://www.scopus.com/inward/record.uri?eid=2-s2.0-85086605453&doi=10.1136%2fbcr-2020-234314&partnerID=40&md5=e3e8956598c2170a0b234361bf00fd22		Article	Final		Scopus	2-s2.0-85086605453
	Familial hemiplegic migraine with an ATP1A4 mutation: Clinical spectrum and carbamazepine efficacy	2020	Coppola G., Pastorino G.M.G., Vetri L., D’onofrio F., Operto F.F.	Brain Sciences	10	6	372	1	5		1	10.3390/brainsci10060372	https://www.scopus.com/inward/record.uri?eid=2-s2.0-85090094851&doi=10.3390%2fbrainsci10060372&partnerID=40&md5=63b6c04e75dbb2c4f7498cad2f4e04a0		Article	Final	All Open Access, Gold, Green	Scopus	2-s2.0-85090094851
32540801	De novo truncating mutation in SCN1A as a cause of febrile seizures plus (FS+)	2020	Jaimes A., Guerrero-López R., González-Giráldez B., Serratosa J.M.	Epileptic Disorders	22	3		323	326			10.1684/epd.2020.1167	https://www.scopus.com/inward/record.uri?eid=2-s2.0-85087469098&doi=10.1684%2fepd.2020.1167&partnerID=40&md5=bc23f1c3d4f73f2f729c9934fd76a525		Article	Final		Scopus	2-s2.0-85087469098
32597768	Early-onset epileptic encephalopathy with migrating focal seizures associated with a FARS2 homozygous nonsense variant	2020	Ville D., Lesca G., Labalme A., Portes V.D., Arzimanoglou A., de Bellescize J.	Epileptic Disorders	22	3		327	335		1	10.1684/epd.2020.1168	https://www.scopus.com/inward/record.uri?eid=2-s2.0-85087435172&doi=10.1684%2fepd.2020.1168&partnerID=40&md5=7046b6ac51cbcf29eaaa48fe0c4c0039		Article	Final		Scopus	2-s2.0-85087435172
32427350	Utility of genetic testing for therapeutic decision-making in adults with epilepsy	2020	Johannesen K.M., Nikanorova N., Marjanovic D., Pavbro A., Larsen L.H.G., Rubboli G., Møller R.S.	Epilepsia	61	6		1234	1239		15	10.1111/epi.16533	https://www.scopus.com/inward/record.uri?eid=2-s2.0-85085014936&doi=10.1111%2fepi.16533&partnerID=40&md5=67c5dda4bbcd373c38c250f4464325d4		Article	Final		Scopus	2-s2.0-85085014936
32321192	Cannabidiol improves survival and behavioural co-morbidities of Dravet syndrome in mice	2020	Patra P.H., Serafeimidou-Pouliou E., Bazelot M., Whalley B.J., Williams C.M., McNeish A.J.	British Journal of Pharmacology	177	12		2779	2792		10	10.1111/bph.15003	https://www.scopus.com/inward/record.uri?eid=2-s2.0-85083787560&doi=10.1111%2fbph.15003&partnerID=40&md5=e378c04da38769c5ae3eeb10c665e8fc		Article	Final	All Open Access, Hybrid Gold, Green	Scopus	2-s2.0-85083787560
32165031	Dravet Syndrome: A Review of Current Management	2020	Wheless J.W., Fulton S.P., Mudigoudar B.D.	Pediatric Neurology	107			28	40		15	10.1016/j.pediatrneurol.2020.01.005	https://www.scopus.com/inward/record.uri?eid=2-s2.0-85081260815&doi=10.1016%2fj.pediatrneurol.2020.01.005&partnerID=40&md5=378397126db143141125cd36c7532a9e		Review	Final		Scopus	2-s2.0-85081260815
32139178	Targeted gene panel sequencing in early infantile onset developmental and epileptic encephalopathy	2020	Na J.-H., Shin S., Yang D., Kim B., Kim H.D., Kim S., Lee J.-S., Choi J.-R., Lee S.-T., Kang H.-C.	Brain and Development	42	6		438	448		5	10.1016/j.braindev.2020.02.004	https://www.scopus.com/inward/record.uri?eid=2-s2.0-85080888526&doi=10.1016%2fj.braindev.2020.02.004&partnerID=40&md5=5977dd014e4fe4b3eabab8d1d049da94		Article	Final		Scopus	2-s2.0-85080888526
	Possible Genetic Determinants of Response to Phenytoin in a Group of Colombian Patients With Epilepsy	2020	Calderon-Ospina C.A., Galvez J.M., López-Cabra C., Morales N., Restrepo C.M., Rodríguez J., Aristizábal-Gutiérrez F.A., Velez-van-Meerbeke A., Laissue P., Fonseca-Mendoza D.J.	Frontiers in Pharmacology	11		555				3	10.3389/fphar.2020.00555	https://www.scopus.com/inward/record.uri?eid=2-s2.0-85085200819&doi=10.3389%2ffphar.2020.00555&partnerID=40&md5=a0d4afbdb79a544dd87b1e308801bacc		Article	Final	All Open Access, Gold, Green	Scopus	2-s2.0-85085200819
32380047	Tau: A Novel Entry Point for mTOR-Based Treatments in Autism Spectrum Disorder?	2020	Modi M.E., Sahin M.	Neuron	106	3		359	361		3	10.1016/j.neuron.2020.04.019	https://www.scopus.com/inward/record.uri?eid=2-s2.0-85084076280&doi=10.1016%2fj.neuron.2020.04.019&partnerID=40&md5=d10124bbcc965df1a5f62d09edae531a		Article	Final	All Open Access, Bronze	Scopus	2-s2.0-85084076280
32126198	Tau Reduction Prevents Key Features of Autism in Mouse Models	2020	Tai C., Chang C.-W., Yu G.-Q., Lopez I., Yu X., Wang X., Guo W., Mucke L.	Neuron	106	3		421	4.37E+13		18	10.1016/j.neuron.2020.01.038	https://www.scopus.com/inward/record.uri?eid=2-s2.0-85082580042&doi=10.1016%2fj.neuron.2020.01.038&partnerID=40&md5=e5cce60211e1e504f6ebf8b4981ef669		Article	Final	All Open Access, Bronze, Green	Scopus	2-s2.0-85082580042
32146541	Tiered analysis of whole-exome sequencing for epilepsy diagnosis	2020	Dunn P.J., Maher B.H., Albury C.L., Stuart S., Sutherland H.G., Maksemous N., Benton M.C., Smith R.A., Haupt L.M., Griffiths L.R.	Molecular Genetics and Genomics	295	3		751	763		3	10.1007/s00438-020-01657-x	https://www.scopus.com/inward/record.uri?eid=2-s2.0-85082551848&doi=10.1007%2fs00438-020-01657-x&partnerID=40&md5=894653cc9c8afec5c82af766041de7d2		Article	Final		Scopus	2-s2.0-85082551848
32193085	Vaccination management in an asymptomatic child with a novel SCN1A variant and family history of status epilepticus following vaccination: A case report on a potential new direction in personalised medicine	2020	Deng L., Ma A., Wood N., Ardern-Holmes S.	Seizure	78			49	52		1	10.1016/j.seizure.2020.03.005	https://www.scopus.com/inward/record.uri?eid=2-s2.0-85081675860&doi=10.1016%2fj.seizure.2020.03.005&partnerID=40&md5=39207ce7bba61a76f77db45075c44510		Article	Final	All Open Access, Bronze	Scopus	2-s2.0-85081675860
32114117	The voltage-gated sodium channel inhibitor, 4,9-anhydrotetrodotoxin, blocks human Nav1.1 in addition to Nav1.6	2020	Denomme N., Lukowski A.L., Hull J.M., Jameson M.B., Bouza A.A., Narayan A.R.H., Isom L.L.	Neuroscience Letters	724		134853				1	10.1016/j.neulet.2020.134853	https://www.scopus.com/inward/record.uri?eid=2-s2.0-85081274633&doi=10.1016%2fj.neulet.2020.134853&partnerID=40&md5=e6e5b4799febe514d85e863cf270c8e8		Article	Final	All Open Access, Green	Scopus	2-s2.0-85081274633
	A novel SCN1A mutation: A case report	2020	Aslan M., Ozgor B., Kirik S., Gungor S.	Journal of Pediatric Neurosciences	15	2		120	123			10.4103/jpn.JPN_118_18	https://www.scopus.com/inward/record.uri?eid=2-s2.0-85092004529&doi=10.4103%2fjpn.JPN_118_18&partnerID=40&md5=1e8135b31873eb20fc5c5766b0ce3af1		Article	Final	All Open Access, Green	Scopus	2-s2.0-85092004529
32207228	Cardiac arrhythmias in Dravet syndrome: an observational multicenter study	2020	Shmuely S., Surges R., Helling R.M., Gunning W.B., Brilstra E.H., Verhoeven J.S., Cross J.H., Sisodiya S.M., Tan H.L., Sander J.W., Thijs R.D.	Annals of Clinical and Translational Neurology	7	4		462	473		4	10.1002/acn3.51017	https://www.scopus.com/inward/record.uri?eid=2-s2.0-85083373073&doi=10.1002%2facn3.51017&partnerID=40&md5=035a84689641298020176bcbd1f5b397		Article	Final	All Open Access, Gold, Green	Scopus	2-s2.0-85083373073
32079034	Changing Landscape of Dravet Syndrome Management: An Overview	2020	Samanta D.	Neuropediatrics	51	2		135	145		7	10.1055/s-0040-1701694	https://www.scopus.com/inward/record.uri?eid=2-s2.0-85082146735&doi=10.1055%2fs-0040-1701694&partnerID=40&md5=de3b90fc8597ab6ae99a63ecd024f9ee		Article	Final		Scopus	2-s2.0-85082146735
32190912	Focal and generalized seizure activity after local hippocampal or cortical ablation of NaV1.1 channels in mice	2020	Jansen N.A., Dehghani A., Breukel C., Tolner E.A., van den Maagdenberg A.M.J.M.	Epilepsia	61	4		e30	e36		3	10.1111/epi.16482	https://www.scopus.com/inward/record.uri?eid=2-s2.0-85082074907&doi=10.1111%2fepi.16482&partnerID=40&md5=cb1a085cef6a7abc50d3c8ecc2d1504c		Article	Final	All Open Access, Hybrid Gold	Scopus	2-s2.0-85082074907
32167579	Successful use of fenfluramine in nonconvulsive status epilepticus of Dravet syndrome	2020	Specchio N., Pietrafusa N., Ferretti A., Trivisano M., Vigevano F.	Epilepsia	61	4		831	833		8	10.1111/epi.16474	https://www.scopus.com/inward/record.uri?eid=2-s2.0-85081722642&doi=10.1111%2fepi.16474&partnerID=40&md5=a7f04a84b2c36f84e18b5d3da3ab5950		Letter	Final		Scopus	2-s2.0-85081722642
32032478	Modifier genes in SCN1A-related epilepsy syndromes	2020	de Lange I.M., Mulder F., van 't Slot R., Sonsma A.C.M., van Kempen M.J.A., Nijman I.J., Ernst R.F., Knoers N.V.A.M., Brilstra E.H., Koeleman B.P.C.	Molecular Genetics and Genomic Medicine	8	4	e1103				4	10.1002/mgg3.1103	https://www.scopus.com/inward/record.uri?eid=2-s2.0-85079157330&doi=10.1002%2fmgg3.1103&partnerID=40&md5=36af04cb3d524cda935978183fe5a78a		Article	Final	All Open Access, Gold, Green	Scopus	2-s2.0-85079157330
31831882	The case for implementing sustainable routine, population-level genomic reanalysis	2020	Lu C.Y., Hendricks-Sturrup R.M., Mazor K.M., McGuire A.L., Green R.C., Rehm H.L.	Genetics in Medicine	22	4		815	816		1	10.1038/s41436-019-0719-3	https://www.scopus.com/inward/record.uri?eid=2-s2.0-85076381462&doi=10.1038%2fs41436-019-0719-3&partnerID=40&md5=50798d60f90aa92b4831fe45e245d26e		Letter	Final		Scopus	2-s2.0-85076381462
32102923	Interneuron desynchronization precedes seizures in a mouse model of Dravet syndrome	2020	Tran C.H., Vaiana M., Nakuci J., Somarowthu A., Goff K.M., Goldstein N., Murthy P., Muldoon S.F., Goldberg E.M.	Journal of Neuroscience	40	13		2764	2775		15	10.1523/JNEUROSCI.2370-19.2020	https://www.scopus.com/inward/record.uri?eid=2-s2.0-85082542751&doi=10.1523%2fJNEUROSCI.2370-19.2020&partnerID=40&md5=e0cc3a5554fe7030ae20b91d2814ec2f		Article	Final	All Open Access, Bronze	Scopus	2-s2.0-85082542751
32144139	Central neurogenetic signatures of the visuomotor integration system	2020	Bueichekú E., Aznárez-Sanado M., Diez I., Uquillas F.D., Ortiz-Terán L., Qureshi A.Y., Suñol M., Basaia S., Ortiz-Terán E., Pastor M.A., Sepulcre J.	Proceedings of the National Academy of Sciences of the United States of America	117	12		6836	6843		6	10.1073/pnas.1912429117	https://www.scopus.com/inward/record.uri?eid=2-s2.0-85082322438&doi=10.1073%2fpnas.1912429117&partnerID=40&md5=0842cfa562e7abf0d72ee3ac3fe88dc0		Article	Final	All Open Access, Bronze, Green	Scopus	2-s2.0-85082322438
32183904	Gene family information facilitates variant interpretation and identification of disease-associated genes in neurodevelopmental disorders	2020	Lal D., May P., Perez-Palma E., Samocha K.E., Kosmicki J.A., Robinson E.B., Møller R.S., Krause R., Nürnberg P., Weckhuysen S., De Jonghe P., Guerrini R., Niestroj L.M., Du J., Marini C., Balling R., Barisic N., Baulac S., Caglayan H., Craiu D.C., De Jonghe P., Depienne C., Guerrini R., Helbig I., Hjalgrim H., Hoffman-Zacharska D., Jähn J., Klein K.M., Koeleman B.P.C., Komarek V., Krause R., Legu…	Genome Medicine	12	1	28				6	10.1186/s13073-020-00725-6	https://www.scopus.com/inward/record.uri?eid=2-s2.0-85082059954&doi=10.1186%2fs13073-020-00725-6&partnerID=40&md5=5dcd0b0683a5861ae190972c2360b8a5		Article	Final	All Open Access, Gold, Green	Scopus	2-s2.0-85082059954
32168371	A catalogue of new incidence estimates of monogenic neurodevelopmental disorders caused by de novo variants	2020	López-Rivera J.A., Pérez-Palma E., Symonds J., Lindy A.S., McKnight D.A., Leu C., Zuberi S., Brunklaus A., Møller R.S., Lal D.	Brain	143	3		1099	1105		10	10.1093/brain/awaa051	https://www.scopus.com/inward/record.uri?eid=2-s2.0-85089128882&doi=10.1093%2fbrain%2fawaa051&partnerID=40&md5=1febf4e369fbeb9b768390a6538d0f58		Article	Final	All Open Access, Hybrid Gold, Green	Scopus	2-s2.0-85089128882
31830809	Sexually Divergent Mortality and Partial Phenotypic Rescue after Gene Therapy in a Mouse Model of Dravet Syndrome	2020	Niibori Y., Lee S.J., Minassian B.A., Hampson D.R.	Human Gene Therapy	31	5月6日		339	351		10	10.1089/hum.2019.225	https://www.scopus.com/inward/record.uri?eid=2-s2.0-85082342630&doi=10.1089%2fhum.2019.225&partnerID=40&md5=a73dd05c06bec08dd9d7be81de195a8f		Article	Final	All Open Access, Hybrid Gold, Green	Scopus	2-s2.0-85082342630
32090326	Biological concepts in human sodium channel epilepsies and their relevance in clinical practice	2020	Brunklaus A., Du J., Steckler F., Ghanty I.I., Johannesen K.M., Fenger C.D., Schorge S., Baez-Nieto D., Wang H.-R., Allen A., Pan J.Q., Lerche H., Heyne H., Symonds J.D., Zuberi S.M., Sanders S., Sheidley B.R., Craiu D., Olson H.E., Weckhuysen S., DeJonge P., Helbig I., Van Esch H., Busa T., Milh M., Isidor B., Depienne C., Poduri A., Campbell A.J., Dimidschstein J., Møller R.S., Lal D.	Epilepsia	61	3		387	399		17	10.1111/epi.16438	https://www.scopus.com/inward/record.uri?eid=2-s2.0-85082148008&doi=10.1111%2fepi.16438&partnerID=40&md5=5ee767eb7a125a756ca27b177a8b86db		Article	Final	All Open Access, Green	Scopus	2-s2.0-85082148008
32096222	New insights into the early mechanisms of epileptogenesis in a zebrafish model of Dravet syndrome	2020	Tiraboschi E., Martina S., van der Ent W., Grzyb K., Gawel K., Cordero-Maldonado M.L., Poovathingal S.K., Heintz S., Satheesh S.V., Brattespe J., Xu J., Suster M., Skupin A., Esguerra C.V.	Epilepsia	61	3		549	560		18	10.1111/epi.16456	https://www.scopus.com/inward/record.uri?eid=2-s2.0-85082146219&doi=10.1111%2fepi.16456&partnerID=40&md5=14ba241c0db7dd014841a5149c1f6f9d		Article	Final	All Open Access, Hybrid Gold, Green	Scopus	2-s2.0-85082146219
32001838	Antisense oligonucleotide hope for childhood epilepsies	2020	Fyfe I.	Nature Reviews Neurology	16	3		128				10.1038/s41582-020-0319-5	https://www.scopus.com/inward/record.uri?eid=2-s2.0-85081113391&doi=10.1038%2fs41582-020-0319-5&partnerID=40&md5=de1d4a460453377c0d36946cf5ebdde0		Article	Final	All Open Access, Bronze	Scopus	2-s2.0-85081113391
31943325	Scn8a Antisense Oligonucleotide Is Protective in Mouse Models of SCN8A Encephalopathy and Dravet Syndrome	2020	Lenk G.M., Jafar-Nejad P., Hill S.F., Huffman L.D., Smolen C.E., Wagnon J.L., Petit H., Yu W., Ziobro J., Bhatia K., Parent J., Giger R.J., Rigo F., Meisler M.H.	Annals of Neurology	87	3		339	346		24	10.1002/ana.25676	https://www.scopus.com/inward/record.uri?eid=2-s2.0-85079063120&doi=10.1002%2fana.25676&partnerID=40&md5=6b9d9a3f7cdb891f4b22fee61d72efe4		Article	Final	All Open Access, Hybrid Gold, Green	Scopus	2-s2.0-85079063120
31791873	Genotype-phenotype correlation on 45 individuals with West syndrome	2020	Krey I., Krois-Neudenberger J., Hentschel J., Syrbe S., Polster T., Hanker B., Fiedler B., Kurlemann G., Lemke J.R.	European Journal of Paediatric Neurology	25			134	138		9	10.1016/j.ejpn.2019.11.010	https://www.scopus.com/inward/record.uri?eid=2-s2.0-85075899242&doi=10.1016%2fj.ejpn.2019.11.010&partnerID=40&md5=7f76470ad90f493be8f8b42842c2ec96		Article	Final		Scopus	2-s2.0-85075899242
31720899	Whole exome sequencing identifies a novel SCN1A mutation in genetic (idiopathic) generalized epilepsy and juvenile myoclonic epilepsy subtypes	2020	Chan C.-K., Low J.S.-Y., Lim K.-S., Low S.-K., Tan C.-T., Ng C.-C.	Neurological Sciences	41	3		591	598		3	10.1007/s10072-019-04122-9	https://www.scopus.com/inward/record.uri?eid=2-s2.0-85075210113&doi=10.1007%2fs10072-019-04122-9&partnerID=40&md5=4df4923a3a0b57f0e5c6a2c5750a9f78		Article	Final		Scopus	2-s2.0-85075210113
31415810	DNA methylation microarray uncovers a permissive methylome for cardiomyocyte differentiation in human mesenchymal stem cells	2020	Govarthanan K., Gupta P.K., Ramasamy D., Kumar P., Mahadevan S., Verma R.S.	Genomics	112	2		1384	1395		6	10.1016/j.ygeno.2019.08.007	https://www.scopus.com/inward/record.uri?eid=2-s2.0-85070542233&doi=10.1016%2fj.ygeno.2019.08.007&partnerID=40&md5=e7082d4e091511ba96de4b4f351be15a		Article	Final	All Open Access, Bronze	Scopus	2-s2.0-85070542233
	The Glucagon-Like Peptide-1 Analogue Liraglutide Reduces Seizures Susceptibility, Cognition Dysfunction and Neuronal Apoptosis in a Mouse Model of Dravet Syndrome	2020	Liu S., Jin Z., Zhang Y., Rong S., He W., Sun K., Wan D., Huo J., Xiao L., Li X., Ding N., Wang F., Sun T.	Frontiers in Pharmacology	11		136				2	10.3389/fphar.2020.00136	https://www.scopus.com/inward/record.uri?eid=2-s2.0-85082591616&doi=10.3389%2ffphar.2020.00136&partnerID=40&md5=3ed90ede31c72320051d51bda92b08ce		Article	Final	All Open Access, Gold, Green	Scopus	2-s2.0-85082591616
	Risk analysis of vaccination in children with genetic epilepsy combined with febrile seizures plus [遗传性癫痫伴热性惊厥附加症患儿的疫苗接种风险分析]	2020	Shao X., Hu J., Yao Y., Yu D., Yuan Z.	Chinese Journal of Neuromedicine	19	2		176	180			10.3760/cma.j.issn.1671-8925.2020.02.011	https://www.scopus.com/inward/record.uri?eid=2-s2.0-85091102602&doi=10.3760%2fcma.j.issn.1671-8925.2020.02.011&partnerID=40&md5=816329c12090be30431504056b404d09		Article	Final		Scopus	2-s2.0-85091102602
	Venom Peptides with Dual Modulatory Activity on the Voltage-Gated Sodium Channel NaV1.1 Provide Novel Leads for Development of Antiepileptic Drugs	2020	Chow C.Y., Chin Y.K.-Y., Walker A.A., Guo S., Blomster L.V., Ward M.J., Herzig V., Rokyta D.R., King G.F.	ACS Pharmacology and Translational Science	3	1		119	134		4	10.1021/acsptsci.9b00079	https://www.scopus.com/inward/record.uri?eid=2-s2.0-85085652046&doi=10.1021%2facsptsci.9b00079&partnerID=40&md5=1ed986e44cf0b47096ab4d3061691aab		Article	Final	All Open Access, Bronze, Green	Scopus	2-s2.0-85085652046
32031527	Age-dependent epileptic encephalopathy associated with an unusual co-occurrence of ZEB2 and SCN1A variants	2020	Nardello R., Fontana A., Donato Mangano G., Efthymiou S., Salpietro V., Houlden H., Mangano S.	Epileptic Disorders	22	1		111	115		1	10.1684/epd.2020.1138	https://www.scopus.com/inward/record.uri?eid=2-s2.0-85081747424&doi=10.1684%2fepd.2020.1138&partnerID=40&md5=91826682f852be53d30171d230e25b2e		Article	Final		Scopus	2-s2.0-85081747424
31870807	Adolescent behavioral abnormalities in a Scn1a+/− mouse model of Dravet syndrome	2020	Bahceci D., Anderson L.L., Occelli Hanbury Brown C.V., Zhou C., Arnold J.C.	Epilepsy and Behavior	103		106842				3	10.1016/j.yebeh.2019.106842	https://www.scopus.com/inward/record.uri?eid=2-s2.0-85077156959&doi=10.1016%2fj.yebeh.2019.106842&partnerID=40&md5=1f5feddaea2c9787134b8607c42f6bc8		Article	Final		Scopus	2-s2.0-85077156959
31864146	A single-center, retrospective analysis of genotype-phenotype correlations in children with Dravet syndrome	2020	Gertler T.S., Calhoun J., Laux L.	Seizure	75			1	6		2	10.1016/j.seizure.2019.12.009	https://www.scopus.com/inward/record.uri?eid=2-s2.0-85076564607&doi=10.1016%2fj.seizure.2019.12.009&partnerID=40&md5=aa991f04e3a324915983fe5f36785e67		Article	Final	All Open Access, Bronze, Green	Scopus	2-s2.0-85076564607
31755124	SCN1A Variants in vaccine-related febrile seizures: A prospective study	2020	Damiano J.A., Deng L., Li W., Burgess R., Schneider A.L., Crawford N.W., Buttery J., Gold M., Richmond P., Macartney K.K., Hildebrand M.S., Scheffer I.E., Wood N., Berkovic S.F.	Annals of Neurology	87	2		281	288		8	10.1002/ana.25650	https://www.scopus.com/inward/record.uri?eid=2-s2.0-85076395681&doi=10.1002%2fana.25650&partnerID=40&md5=83db070185febc682b86942e8ef79d2a		Article	Final	All Open Access, Green	Scopus	2-s2.0-85076395681
31786370	Comparisons of dual isogenic human iPSC pairs identify functional alterations directly caused by an epilepsy associated SCN1A mutation	2020	Xie Y., Ng N.N., Safrina O.S., Ramos C.M., Ess K.C., Schwartz P.H., Smith M.A., O'Dowd D.K.	Neurobiology of Disease	134		104627				7	10.1016/j.nbd.2019.104627	https://www.scopus.com/inward/record.uri?eid=2-s2.0-85076040352&doi=10.1016%2fj.nbd.2019.104627&partnerID=40&md5=0b5fc409b24c7b7a55f10491c5aaaf7d		Article	Final	All Open Access, Hybrid Gold, Green	Scopus	2-s2.0-85076040352
31782251	SCN1A variants from bench to bedside—improved clinical prediction from functional characterization	2020	Brunklaus A., Schorge S., Smith A.D., Ghanty I., Stewart K., Gardiner S., Du J., Pérez-Palma E., Symonds J.D., Collier A.C., Lal D., Zuberi S.M.	Human Mutation	41	2		363	374		8	10.1002/humu.23943	https://www.scopus.com/inward/record.uri?eid=2-s2.0-85075712737&doi=10.1002%2fhumu.23943&partnerID=40&md5=b2a499bf1ef6f98bda6ec0ffe80eb852		Review	Final	All Open Access, Green	Scopus	2-s2.0-85075712737
31677916	Two autopsy cases of sudden unexpected death from Dravet syndrome with novel de novo SCN1A variants	2020	Hata Y., Oku Y., Taneichi H., Tanaka T., Igarashi N., Niida Y., Nishida N.	Brain and Development	42	2		171	178		2	10.1016/j.braindev.2019.10.005	https://www.scopus.com/inward/record.uri?eid=2-s2.0-85074442741&doi=10.1016%2fj.braindev.2019.10.005&partnerID=40&md5=016b06f9a2914f738e6d8ada57321085		Article	Final		Scopus	2-s2.0-85074442741
	Transcriptional Regulation of Channelopathies in Genetic and Acquired Epilepsies	2020	van Loo K.M.J., Becker A.J.	Frontiers in Cellular Neuroscience	13		587					10.3389/fncel.2019.00587	https://www.scopus.com/inward/record.uri?eid=2-s2.0-85078722811&doi=10.3389%2ffncel.2019.00587&partnerID=40&md5=160df93a56a47bf0943a5bd728b2373d		Review	Final	All Open Access, Gold, Green	Scopus	2-s2.0-85078722811
31940483	GluN2A NMDA Receptor Enhancement Improves Brain Oscillations, Synchrony, and Cognitive Functions in Dravet Syndrome and Alzheimer's Disease Models	2020	Hanson J.E., Ma K., Elstrott J., Weber M., Saillet S., Khan A.S., Simms J., Liu B., Kim T.A., Yu G.-Q., Chen Y., Wang T.-M., Jiang Z., Liederer B.M., Deshmukh G., Solanoy H., Chan C., Sellers B.D., Volgraf M., Schwarz J.B., Hackos D.H., Weimer R.M., Sheng M., Gill T.M., Scearce-Levie K., Palop J.J.	Cell Reports	30	2		381	3.96E+06		10	10.1016/j.celrep.2019.12.030	https://www.scopus.com/inward/record.uri?eid=2-s2.0-85077747547&doi=10.1016%2fj.celrep.2019.12.030&partnerID=40&md5=1405a188a058c98ec46fb8e3842a3fdc		Article	Final	All Open Access, Gold, Green	Scopus	2-s2.0-85077747547
31865891	Systematic Review of the Genetics of Sudden Unexpected Death in Epilepsy: Potential Overlap With Sudden Cardiac Death and Arrhythmia-Related Genes	2020	Chahal C.A.A., Salloum M.N., Alahdab F., Gottwald J.A., Tester D.J., Anwer L.A., So E.L., Murad M.H., St Louis E.K., Ackerman M.J., Somers V.K.	Journal of the American Heart Association	9	1	e012264				25	10.1161/JAHA.119.012264	https://www.scopus.com/inward/record.uri?eid=2-s2.0-85077146434&doi=10.1161%2fJAHA.119.012264&partnerID=40&md5=25f8e1d6e8c11d671d6b0d31b6b5ec7c		Review	Final	All Open Access, Gold, Green	Scopus	2-s2.0-85077146434
33109474	Parkinsonism in children: Clinical classification and etiological spectrum	2020	Leuzzi V., Nardecchia F., Pons R., Galosi S.	Parkinsonism and Related Disorders								10.1016/j.parkreldis.2020.10.002	https://www.scopus.com/inward/record.uri?eid=2-s2.0-85094601188&doi=10.1016%2fj.parkreldis.2020.10.002&partnerID=40&md5=83b2bc155b0e4c9652a78e87fad0782d		Review	Article in Press	All Open Access, Bronze	Scopus	2-s2.0-85094601188
	Genetic epilepsy with febrile seizures plus (GEFS+)	2020	Sharkov A.A.	Epilepsy and Paroxysmal Conditions	12			S50	S56			10.17749/2077-8333.2020.12.1S.S50-S56	https://www.scopus.com/inward/record.uri?eid=2-s2.0-85090783117&doi=10.17749%2f2077-8333.2020.12.1S.S50-S56&partnerID=40&md5=1606a02e25a048bb23e71471154059af		Conference Paper	Final	All Open Access, Gold	Scopus	2-s2.0-85090783117
	Analysis of genetic variants in SCN1A, SCN2A, KCNK18, TRPA1 and STX1A as a possible marker of migraine	2020	Kowalska M., Prendecki M., Kapelusiak-Pielok M., Grzelak T., Łagan-Jędrzejczyk U., Wiszniewska M., Kozubski W., Dorszewska J.	Current Genomics	21	3		224	236		2	10.2174/1389202921666200415181222	https://www.scopus.com/inward/record.uri?eid=2-s2.0-85087918496&doi=10.2174%2f1389202921666200415181222&partnerID=40&md5=0c429974f99b7e47054aca36615f0fe3		Article	Final	All Open Access, Green	Scopus	2-s2.0-85087918496
	Network Pharmacology-Based Approach to Investigate the Mechanisms of Mahai Capsules in the Treatment of Cardiovascular Diseases	2020	Shi M., Li B., Yuan Q., Gan X., Ren X., Jiang S., Liu Z.	Evidence-based Complementary and Alternative Medicine	2020		9180982				3	10.1155/2020/9180982	https://www.scopus.com/inward/record.uri?eid=2-s2.0-85085879205&doi=10.1155%2f2020%2f9180982&partnerID=40&md5=1fdc2af019ac0d250a99a16c5c122471		Article	Final	All Open Access, Gold, Green	Scopus	2-s2.0-85085879205
32185219	Association of SCN1A, SCN2A, and UGT2B7 Polymorphisms with Responsiveness to Valproic Acid in the Treatment of Epilepsy	2020	Lu Y., Su Q., Li M., Dayimu A., Dai X., Wang Z., Che F., Xue F.	BioMed Research International	2020		8096235				5	10.1155/2020/8096235	https://www.scopus.com/inward/record.uri?eid=2-s2.0-85081997160&doi=10.1155%2f2020%2f8096235&partnerID=40&md5=5e508a333662f487b932f0713752c550		Article	Final	All Open Access, Gold, Green	Scopus	2-s2.0-85081997160
32134913	NaV1.1 and NaV1.6 selective compounds reduce the behavior phenotype and epileptiform activity in a novel zebrafish model for Dravet syndrome	2020	Weuring W.J., Singh S., Volkers L., Rook M.B., Van't Slot R.H., Bosma M., Inserra M., Vetter I., Verhoeven-Duif N.M., Braun K.P.J., Rivara M., Koeleman B.P.C.	PLoS ONE	15	3	e0219106				6	10.1371/journal.pone.0219106	https://www.scopus.com/inward/record.uri?eid=2-s2.0-85081028076&doi=10.1371%2fjournal.pone.0219106&partnerID=40&md5=515cb1b840e1cc9cd0735adb5e7703e8		Article	Final	All Open Access, Gold, Green	Scopus	2-s2.0-85081028076
	Dravet syndrome-A case report from Aseer, Saudi Arabia	2020	Behir M.M., Saeed M., Siddiqui A.F.	Bangladesh Journal of Medical Science	19	2		315	318			10.3329/bjms.v19i2.45014	https://www.scopus.com/inward/record.uri?eid=2-s2.0-85078432643&doi=10.3329%2fbjms.v19i2.45014&partnerID=40&md5=2386f3d0ba064cc167a92adfcced78d7		Article	Final	All Open Access, Gold	Scopus	2-s2.0-85078432643
31980364	Precision medicine in sodium channelopathies – Moving beyond seizure control towards disease modification	2020	Brunklaus A.	European Journal of Paediatric Neurology	24			7			1	10.1016/j.ejpn.2020.01.008	https://www.scopus.com/inward/record.uri?eid=2-s2.0-85078351392&doi=10.1016%2fj.ejpn.2020.01.008&partnerID=40&md5=1c2a95294734f43b5ad5ee1708184d7e		Editorial	Final		Scopus	2-s2.0-85078351392
31928904	Differential excitatory vs inhibitory SCN expression at single cell level regulates brain sodium channel function in neurodevelopmental disorders	2020	Du J., Simmons S., Brunklaus A., Adiconis X., Hession C.C., Fu Z., Li Y., Shema R., Møller R.S., Barak B., Feng G., Meisler M., Sanders S., Lerche H., Campbell A.J., McCarroll S., Levin J.Z., Lal D.	European Journal of Paediatric Neurology	24			129	133		5	10.1016/j.ejpn.2019.12.019	https://www.scopus.com/inward/record.uri?eid=2-s2.0-85077682812&doi=10.1016%2fj.ejpn.2019.12.019&partnerID=40&md5=f3c5d957a41802296c3b66b7c0facb74		Article	Final		Scopus	2-s2.0-85077682812
	Age Is Just a Number: Adults Deserve the Same Access to Genetic Testing as Children	2020	Perry M.S.	Epilepsy Currents	20	1		14	15		1	10.1177/1535759719887695	https://www.scopus.com/inward/record.uri?eid=2-s2.0-85077191124&doi=10.1177%2f1535759719887695&partnerID=40&md5=13fbeff6dcc2d2c2c800a0e3e85353ad		Note	Final	All Open Access, Gold, Green	Scopus	2-s2.0-85077191124
31870697	Rodent genetic models of neurodevelopmental disorders and epilepsy	2020	Gonzalez-Sulser A.	European Journal of Paediatric Neurology	24			66	69		2	10.1016/j.ejpn.2019.12.012	https://www.scopus.com/inward/record.uri?eid=2-s2.0-85077158938&doi=10.1016%2fj.ejpn.2019.12.012&partnerID=40&md5=ee723ecaed76855e295fa9ddad55dc1b		Review	Final	All Open Access, Green	Scopus	2-s2.0-85077158938
31880072	First FHM3 mouse model shows spontaneous cortical spreading depolarizations	2020	Jansen N.A., Dehghani A., Linssen M.M.L., Breukel C., Tolner E.A., van den Maagdenberg A.M.J.M.	Annals of Clinical and Translational Neurology	7	1		132	138		11	10.1002/acn3.50971	https://www.scopus.com/inward/record.uri?eid=2-s2.0-85077143378&doi=10.1002%2facn3.50971&partnerID=40&md5=2cd369dcc884fd00e66873818003088d		Article	Final	All Open Access, Gold, Green	Scopus	2-s2.0-85077143378
31889633	Recent advances in treatment of epilepsy-related sodium channelopathies	2020	Musto E., Gardella E., Møller R.S.	European Journal of Paediatric Neurology	24			123	128		12	10.1016/j.ejpn.2019.12.009	https://www.scopus.com/inward/record.uri?eid=2-s2.0-85077014693&doi=10.1016%2fj.ejpn.2019.12.009&partnerID=40&md5=ab91fc0156911282698ef01f0ca23609		Review	Final		Scopus	2-s2.0-85077014693
31879226	Abnormal brain gamma oscillations in response to auditory stimulation in Dravet syndrome	2020	Sanchez-Carpintero R., Urrestarazu E., Cieza S., Alegre M., Artieda J., Crespo-Eguilaz N., Valencia M.	European Journal of Paediatric Neurology	24			134	141		2	10.1016/j.ejpn.2019.12.004	https://www.scopus.com/inward/record.uri?eid=2-s2.0-85076854284&doi=10.1016%2fj.ejpn.2019.12.004&partnerID=40&md5=157d4b65c24ed2c8d1c60d86e352320f		Article	Final		Scopus	2-s2.0-85076854284
31882278	Epilepsy and developmental disorders: Next generation sequencing in the clinic	2020	Symonds J.D., McTague A.	European Journal of Paediatric Neurology	24			15	23		26	10.1016/j.ejpn.2019.12.008	https://www.scopus.com/inward/record.uri?eid=2-s2.0-85076840123&doi=10.1016%2fj.ejpn.2019.12.008&partnerID=40&md5=18c8272dafc5a14e1b23fde1de7f2342		Review	Final	All Open Access, Green	Scopus	2-s2.0-85076840123
31765958	Mutation spectrum of the SCN1A gene in a Hungarian population with epilepsy	2020	Till Á., Zima J., Fekete A., Bene J., Czakó M., Szabó A., Melegh B., Hadzsiev K.	Seizure	74			8	13		2	10.1016/j.seizure.2019.10.019	https://www.scopus.com/inward/record.uri?eid=2-s2.0-85075265057&doi=10.1016%2fj.seizure.2019.10.019&partnerID=40&md5=53ae7617ec328d5439d620443c9211de		Article	Final	All Open Access, Bronze, Green	Scopus	2-s2.0-85075265057
31862247	Epileptic encephalopathies of infancy: welcome advances	2019	Berkovic S.F.	The Lancet	394	10216		2203	2204			10.1016/S0140-6736(19)31239-5	https://www.scopus.com/inward/record.uri?eid=2-s2.0-85076533681&doi=10.1016%2fS0140-6736%2819%2931239-5&partnerID=40&md5=fe0224c35fe9252417bb5b24e78ffad4		Note	Final		Scopus	2-s2.0-85076533681
31904127	SCN1A/NaV1.1 channelopathies: Mechanisms in expression systems, animal models, and human iPSC models	2019	Mantegazza M., Broccoli V.	Epilepsia	60	S3		S25	S38		10	10.1111/epi.14700	https://www.scopus.com/inward/record.uri?eid=2-s2.0-85077480498&doi=10.1111%2fepi.14700&partnerID=40&md5=f52c5a8aad8cf91fcc8ab54c1f1f5507		Article	Final	All Open Access, Bronze	Scopus	2-s2.0-85077480498
31904125	Dravet syndrome as part of the clinical and genetic spectrum of sodium channel epilepsies and encephalopathies	2019	Mei D., Cetica V., Marini C., Guerrini R.	Epilepsia	60	S3		S2	S7		6	10.1111/epi.16054	https://www.scopus.com/inward/record.uri?eid=2-s2.0-85077307514&doi=10.1111%2fepi.16054&partnerID=40&md5=f9c66c1c569189e241ff10b2963e0217		Article	Final	All Open Access, Bronze	Scopus	2-s2.0-85077307514
31904117	SCN1A-related phenotypes: Epilepsy and beyond	2019	Scheffer I.E., Nabbout R.	Epilepsia	60	S3		S17	S24		30	10.1111/epi.16386	https://www.scopus.com/inward/record.uri?eid=2-s2.0-85077307299&doi=10.1111%2fepi.16386&partnerID=40&md5=7e4a3b34f2e31df7803ae5ca97791d30		Article	Final	All Open Access, Bronze, Green	Scopus	2-s2.0-85077307299
31346614	Circadian regulation of sleep in a pre-clinical model of Dravet syndrome: Dynamics of sleep stage and siesta re-entrainment	2019	Sanchez R.E.A., Bussi I.L., Ben-Hamo M., Caldart C.S., Catterall W.A., De La Iglesia H.O.	Sleep	42	12	zsz173				3	10.1093/sleep/zsz173	https://www.scopus.com/inward/record.uri?eid=2-s2.0-85077224001&doi=10.1093%2fsleep%2fzsz173&partnerID=40&md5=3cd6dbe9f82cd8bd5bd83f36d928955c		Article	Final	All Open Access, Green	Scopus	2-s2.0-85077224001
	Re-annotation of 191 developmental and epileptic encephalopathy-associated genes unmasks de novo variants in SCN1A	2019	Steward C.A., Roovers J., Suner M.-M., Gonzalez J.M., Uszczynska-Ratajczak B., Pervouchine D., Fitzgerald S., Viola M., Stamberger H., Hamdan F.F., Ceulemans B., Leroy P., Nava C., Lepine A., Tapanari E., Keiller D., Abbs S., Sanchis-Juan A., Grozeva D., Rogers A.S., Diekhans M., Guigó R., Petryszak R., Minassian B.A., Cavalleri G., Vitsios D., Petrovski S., Harrow J., Flicek P., Lucy Raymond F.,…	npj Genomic Medicine	4	1	31				12	10.1038/s41525-019-0106-7	https://www.scopus.com/inward/record.uri?eid=2-s2.0-85076055800&doi=10.1038%2fs41525-019-0106-7&partnerID=40&md5=892976c46e03d12867dea4fb0268055d		Article	Final	All Open Access, Gold, Green	Scopus	2-s2.0-85076055800
31708430	Novel treatment approaches and pediatric research networks in status epilepticus	2019	Bialer M., Cross H., Hedrich U.B.S., Lagae L., Lerche H., Loddenkemper T.	Epilepsy and Behavior	101		106564				1	10.1016/j.yebeh.2019.106564	https://www.scopus.com/inward/record.uri?eid=2-s2.0-85075498024&doi=10.1016%2fj.yebeh.2019.106564&partnerID=40&md5=4eb519092a4bbfd8336f70e7b10e9294		Article	Final		Scopus	2-s2.0-85075498024
31758544	Reduced cannabinoid 2 receptor activity increases susceptibility to induced seizures in mice	2019	Shapiro L., Wong J.C., Escayg A.	Epilepsia	60	12		2359	2369		12	10.1111/epi.16388	https://www.scopus.com/inward/record.uri?eid=2-s2.0-85075418306&doi=10.1111%2fepi.16388&partnerID=40&md5=120e918afd6a143778044693e3c03ae7		Article	Final	All Open Access, Green	Scopus	2-s2.0-85075418306
31714027	Novel and de novo mutation of PCDH19 in Girls Clustering Epilepsy	2019	Yang L., Liu J., Su Q., Li Y., Yang X., Xu L., Tong L., Li B.	Brain and Behavior	9	12	e01455				3	10.1002/brb3.1455	https://www.scopus.com/inward/record.uri?eid=2-s2.0-85074995141&doi=10.1002%2fbrb3.1455&partnerID=40&md5=c71aa04ed88f6c793abc776f77c6d3d2		Article	Final	All Open Access, Gold, Green	Scopus	2-s2.0-85074995141
31578435	Epilepsy and neuropsychiatric comorbidities in mice carrying a recurrent Dravet syndrome SCN1A missense mutation	2019	Ricobaraza A., Mora-Jimenez L., Puerta E., Sanchez-Carpintero R., Mingorance A., Artieda J., Nicolas M.J., Besne G., Bunuales M., Gonzalez-Aparicio M., Sola-Sevilla N., Valencia M., Hernandez-Alcoceba R.	Scientific Reports	9	1	14172				14	10.1038/s41598-019-50627-w	https://www.scopus.com/inward/record.uri?eid=2-s2.0-85072923195&doi=10.1038%2fs41598-019-50627-w&partnerID=40&md5=5d7aeedf4e74f4873c9cc78b24c231d4		Article	Final	All Open Access, Gold, Green	Scopus	2-s2.0-85072923195
31570297	Priorities for Newborn Screening of Genetic Epilepsy	2019	Hess-Homeier D.L., Cunniff C., Grinspan Z.M.	Pediatric Neurology	101			83	85			10.1016/j.pediatrneurol.2019.07.009	https://www.scopus.com/inward/record.uri?eid=2-s2.0-85072671754&doi=10.1016%2fj.pediatrneurol.2019.07.009&partnerID=40&md5=46471a53b25894a250bc18da0d8a50d3		Article	Final		Scopus	2-s2.0-85072671754
31445030	Serotonin abnormalities in Dravet syndrome mice before and after the age of seizure onset	2019	Hatini P.G., Commons K.G.	Brain Research	1724		146399				4	10.1016/j.brainres.2019.146399	https://www.scopus.com/inward/record.uri?eid=2-s2.0-85072314448&doi=10.1016%2fj.brainres.2019.146399&partnerID=40&md5=a3a88d983526ab1e094c1535f2dd5287		Article	Final	All Open Access, Green	Scopus	2-s2.0-85072314448
31445158	Transcriptomes of Dravet syndrome iPSC derived GABAergic cells reveal dysregulated pathways for chromatin remodeling and neurodevelopment	2019	Schuster J., Laan L., Klar J., Jin Z., Huss M., Korol S., Noraddin F.H., Sobol M., Birnir B., Dahl N.	Neurobiology of Disease	132		104583				13	10.1016/j.nbd.2019.104583	https://www.scopus.com/inward/record.uri?eid=2-s2.0-85071255910&doi=10.1016%2fj.nbd.2019.104583&partnerID=40&md5=44b5db8260b6b4c7d3cd84f18d8c1eb8		Article	Final	All Open Access, Hybrid Gold, Green	Scopus	2-s2.0-85071255910
30996233	Delayed maturation of GABAergic signaling in the Scn1a and Scn1b mouse models of Dravet Syndrome	2019	Yuan Y., O’Malley H.A., Smaldino M.A., Bouza A.A., Hull J.M., Isom L.L.	Scientific Reports	9	1	6210				10	10.1038/s41598-019-42191-0	https://www.scopus.com/inward/record.uri?eid=2-s2.0-85064541922&doi=10.1038%2fs41598-019-42191-0&partnerID=40&md5=ad426123c04bfbb5be9585f1e425f6fb		Article	Final	All Open Access, Gold, Green	Scopus	2-s2.0-85064541922
30705357	Small changes in synaptic gain lead to seizure-like activity in neuronal network at criticality	2019	Du J., Vegh V., Reutens D.C.	Scientific Reports	9	1	1097				5	10.1038/s41598-018-37646-9	https://www.scopus.com/inward/record.uri?eid=2-s2.0-85060924594&doi=10.1038%2fs41598-018-37646-9&partnerID=40&md5=d133f4297f1aafafa7645533a4f292e1		Article	Final	All Open Access, Gold, Green	Scopus	2-s2.0-85060924594
31686510	Pharmacokinetics of Phytocannabinoid Acids and Anticonvulsant Effect of Cannabidiolic Acid in a Mouse Model of Dravet Syndrome	2019	Anderson L.L., Low I.K., Banister S.D., McGregor I.S., Arnold J.C.	Journal of Natural Products	82	11		3047	3055		31	10.1021/acs.jnatprod.9b00600	https://www.scopus.com/inward/record.uri?eid=2-s2.0-85074667849&doi=10.1021%2facs.jnatprod.9b00600&partnerID=40&md5=ec289998b30d103ebd79e185c4d80f34		Article	Final	All Open Access, Hybrid Gold	Scopus	2-s2.0-85074667849
31730442	Late sodium current blocker GS967 inhibits persistent currents induced by familial hemiplegic migraine type 3 mutations of the SCN1A gene	2019	Barbieri R., Bertelli S., Pusch M., Gavazzo P.	Journal of Headache and Pain	20	1	107				6	10.1186/s10194-019-1056-2	https://www.scopus.com/inward/record.uri?eid=2-s2.0-85075046781&doi=10.1186%2fs10194-019-1056-2&partnerID=40&md5=6233d0b7ed43c261213bee34dbb3b8fa		Article	Final	All Open Access, Gold, Green	Scopus	2-s2.0-85075046781
31537705	Impairment of sharp-wave ripples in a murine model of dravet syndrome	2019	Cheah C.S., Lundstrom B.N., Catteral W.A., Oakley J.C.	Journal of Neuroscience	39	46		9251	9260		4	10.1523/JNEUROSCI.0890-19.2019	https://www.scopus.com/inward/record.uri?eid=2-s2.0-85074962148&doi=10.1523%2fJNEUROSCI.0890-19.2019&partnerID=40&md5=f48f9e7fd90ded0b776ac5a4b6180c3a		Article	Final	All Open Access, Bronze, Green	Scopus	2-s2.0-85074962148
31718537	An integrative methodology based on protein-protein interaction networks for identification and functional annotation of disease-relevant genes applied to channelopathies	2019	Marín M., Esteban F.J., Ramírez-Rodrigo H., Ros E., Sáez-Lara M.J.	BMC Bioinformatics	20	1	565				4	10.1186/s12859-019-3162-1	https://www.scopus.com/inward/record.uri?eid=2-s2.0-85074944640&doi=10.1186%2fs12859-019-3162-1&partnerID=40&md5=7807fb713eaba643523c644cfb89b453		Article	Final	All Open Access, Gold, Green	Scopus	2-s2.0-85074944640
31697745	Home-cage monitoring ascertains signatures of ictal and interictal behavior in mouse models of generalized seizures	2019	Jankovic M.J., Kapadia P.P., Krishnan V.	PLoS ONE	14	11	e0224856				4	10.1371/journal.pone.0224856	https://www.scopus.com/inward/record.uri?eid=2-s2.0-85074722675&doi=10.1371%2fjournal.pone.0224856&partnerID=40&md5=d2358f3df70e376554dc66a92133cce4		Article	Final	All Open Access, Gold, Green	Scopus	2-s2.0-85074722675
31625159	Coadministered cannabidiol and clobazam: Preclinical evidence for both pharmacodynamic and pharmacokinetic interactions	2019	Anderson L.L., Absalom N.L., Abelev S.V., Low I.K., Doohan P.T., Martin L.J., Chebib M., McGregor I.S., Arnold J.C.	Epilepsia	60	11		2224	2234		42	10.1111/epi.16355	https://www.scopus.com/inward/record.uri?eid=2-s2.0-85074070919&doi=10.1111%2fepi.16355&partnerID=40&md5=6d74e979f46878b19a8eff2aa769875e		Article	Final	All Open Access, Hybrid Gold, Green	Scopus	2-s2.0-85074070919
	Clinical characteristics, resource utilization, quality of life and care situation for patients with Dravet syndrome in Germany [Klinische Charakteristika, Ressourcenverbrauch, Lebensqualität und Versorgungssituation beim Dravet-Syndrom in Deutschland]	2019	Kalski M., Schubert-Bast S., Kieslich M., Leyer A.‑C., Polster T., Herting A., Mayer T., Trollmann R., Neubauer B.A., Bettendorf U., Bast T., Wiemer-Kruel A., von Spiczak S., Kurlemann G., Wolff M., Kluger G., Carroll J., Macdonald D., Pritchard C., Irwin J., Klein K.M., Rosenow F., Strzelczyk A., Kay L.	Zeitschrift fur Epileptologie	32	4		326	338		2	10.1007/s10309-019-00287-7	https://www.scopus.com/inward/record.uri?eid=2-s2.0-85073927743&doi=10.1007%2fs10309-019-00287-7&partnerID=40&md5=b5348f8b0b050996fa23d65cd7b93be1		Article	Final	All Open Access, Hybrid Gold	Scopus	2-s2.0-85073927743
31582194	Gait abnormalities in people with Dravet syndrome: A cross-sectional multi-center study	2019	Di Marco R., Hallemans A., Bellon G., Ragona F., Piazza E., Granata T., Ceulemans B., Schoonjans A.-S., Van de Walle P., Darra F., Dalla Bernardina B., Vecchi M., Sawacha Z., Scarpa B., Masiero S., Benedetti M.G., Del Felice A.	European Journal of Paediatric Neurology	23	6		808	818		7	10.1016/j.ejpn.2019.09.010	https://www.scopus.com/inward/record.uri?eid=2-s2.0-85072692331&doi=10.1016%2fj.ejpn.2019.09.010&partnerID=40&md5=ec5a85f765840021f17e586a12d714c6		Article	Final	All Open Access, Green	Scopus	2-s2.0-85072692331
31621611	A novel developmental encephalopathy with epilepsy and hyperkinetic movement disorders associated with a deletion of the sodium channel gene cluster on chromosome 2q24.3	2019	Mastrangelo M., Mei D., Cesario S., Fioriello F., Bernardini L., Brinciotti M., Guerrini R., Leuzzi V.	Parkinsonism and Related Disorders	68			1	3			10.1016/j.parkreldis.2019.09.016	https://www.scopus.com/inward/record.uri?eid=2-s2.0-85072683392&doi=10.1016%2fj.parkreldis.2019.09.016&partnerID=40&md5=30b02705cd957a3dcea2bae73827e1c1		Letter	Final	All Open Access, Green	Scopus	2-s2.0-85072683392
31116409	An Old Drug for a New Indication: Repurposing Fenfluramine From an Anorexigen to an Antiepileptic Drug	2019	Schoonjans A.-S., Ceulemans B.	Clinical Pharmacology and Therapeutics	106	5		929	932		3	10.1002/cpt.1469	https://www.scopus.com/inward/record.uri?eid=2-s2.0-85066845549&doi=10.1002%2fcpt.1469&partnerID=40&md5=791c7276948689023879ce69d6404e6b		Article	Final		Scopus	2-s2.0-85066845549
31056551	Targeted gene sequencing in 6994 individuals with neurodevelopmental disorder with epilepsy	2019	Heyne H.O., Artomov M., Battke F., Bianchini C., Smith D.R., Liebmann N., Tadigotla V., Stanley C.M., Lal D., Rehm H., Lerche H., Daly M.J., Helbig I., Biskup S., Weber Y.G., Lemke J.R.	Genetics in Medicine	21	11		2496	2503		22	10.1038/s41436-019-0531-0	https://www.scopus.com/inward/record.uri?eid=2-s2.0-85065302613&doi=10.1038%2fs41436-019-0531-0&partnerID=40&md5=5cff946e35dbe470bd2ca833f4e7d956		Article	Final	All Open Access, Green	Scopus	2-s2.0-85065302613
30219789	Inhibitory effects of cannabidiol on voltage-dependent sodium currents	2019	Ghovanloo M.-R., Shuart N.G., Mezeyova J., Dean R.A., Ruben P.C., Goodchild S.J.	Journal of Biological Chemistry	293	43		16546	16558		54	10.1074/jbc.RA118.004929	https://www.scopus.com/inward/record.uri?eid=2-s2.0-85055618862&doi=10.1074%2fjbc.RA118.004929&partnerID=40&md5=4ea44dfbe3018d3df90cc3c223938521		Article	Final	All Open Access, Hybrid Gold, Green	Scopus	2-s2.0-85055618862
31653223	Dissecting the genetic basis of comorbid epilepsy phenotypes in neurodevelopmental disorders	2019	Chow J., Jensen M., Amini H., Hormozdiari F., Penn O., Shifman S., Girirajan S., Hormozdiari F.	Genome Medicine	11	1	65				7	10.1186/s13073-019-0678-y	https://www.scopus.com/inward/record.uri?eid=2-s2.0-85074143269&doi=10.1186%2fs13073-019-0678-y&partnerID=40&md5=98cf2f757fa7406f18bac46f9b48a0c5		Article	Final	All Open Access, Gold, Green	Scopus	2-s2.0-85074143269
31487502	Clinical Application of Targeted Next-Generation Sequencing Panels and Whole Exome Sequencing in Childhood Epilepsy	2019	Costain G., Cordeiro D., Matviychuk D., Mercimek-Andrews S.	Neuroscience	418			291	310		29	10.1016/j.neuroscience.2019.08.016	https://www.scopus.com/inward/record.uri?eid=2-s2.0-85073987434&doi=10.1016%2fj.neuroscience.2019.08.016&partnerID=40&md5=2a8148129a816f5a9228803952fd7117		Article	Final		Scopus	2-s2.0-85073987434
31256750	The lack of influence of IVS5-91 G>A polymorphism of the SCN1A gene on efficacy of lamotrigine in patients with focal epilepsy	2019	Markovic I., Pejanovic-Skobic N., Bozina N., Susak Sporis I., Sporis D., Basic S.	Neurological Research	41	10		930	935		2	10.1080/01616412.2019.1635321	https://www.scopus.com/inward/record.uri?eid=2-s2.0-85068371140&doi=10.1080%2f01616412.2019.1635321&partnerID=40&md5=3f31acc429702c7cf3b40ddb2cebac5c		Article	Final		Scopus	2-s2.0-85068371140
31601780	Ca2+-dependent recruitment of voltage-gated sodium channels underlies bilirubin-induced overexcitation and neurotoxicity	2019	Shi H.-S., Lai K., Yin X.-L., Liang M., Ye H.-B., Shi H.-B., Wang L.-Y., Yin S.-K.	Cell Death and Disease	10	10	774				2	10.1038/s41419-019-1979-1	https://www.scopus.com/inward/record.uri?eid=2-s2.0-85073104741&doi=10.1038%2fs41419-019-1979-1&partnerID=40&md5=60de54e6ed36a51c640376c30361bea0		Article	Final	All Open Access, Gold, Green	Scopus	2-s2.0-85073104741
31586957	Novel missense mutation in the ATP1A2 gene associated with atypical sporapedic hemiplegic migraine	2019	Rispoli M.G., Di Stefano V., Mantuano E., De Angelis M.V.	BMJ Case Reports	12	10	e231129				5	10.1136/bcr-2019-231129	https://www.scopus.com/inward/record.uri?eid=2-s2.0-85072912755&doi=10.1136%2fbcr-2019-231129&partnerID=40&md5=7d45a9c6dc7c5009f3794aae2589b645		Article	Final	All Open Access, Green	Scopus	2-s2.0-85072912755
31401500	Dissecting the phenotypic and genetic spectrum of early childhood-onset generalized epilepsies	2019	Kim S.Y., Jang S.S., Kim J.-I., Kim H., Hwang H., Choi J.E., Chae J.-H., Kim K.J., Lim B.C.	Seizure	71			222	228		1	10.1016/j.seizure.2019.07.024	https://www.scopus.com/inward/record.uri?eid=2-s2.0-85070236490&doi=10.1016%2fj.seizure.2019.07.024&partnerID=40&md5=6fefc67df491d1e4696bbbbfc973e201		Article	Final	All Open Access, Bronze	Scopus	2-s2.0-85070236490
31290619	Biallelic variants in COX4I1 associated with a novel phenotype resembling Leigh syndrome with developmental regression, intellectual disability, and seizures	2019	Pillai N.R., AlDhaheri N.S., Ghosh R., Lim J., Streff H., Nayak A., Graham B.H., Hanchard N.A., Elsea S.H., Scaglia F.	American Journal of Medical Genetics, Part A	179	10		2138	2143		8	10.1002/ajmg.a.61288	https://www.scopus.com/inward/record.uri?eid=2-s2.0-85068756613&doi=10.1002%2fajmg.a.61288&partnerID=40&md5=d38a0843106cb7ffa2c749993b4e95c2		Article	Final	All Open Access, Green	Scopus	2-s2.0-85068756613
31252281	Short- and long-term seizure-free outcomes of dietary treatment in infants according to etiology	2019	Riantarini I., Kim H.D., Ko A., Kim S.H., Kang H.-C., Lee J.S., Jung D.E.	Seizure	71			100	104		6	10.1016/j.seizure.2019.06.002	https://www.scopus.com/inward/record.uri?eid=2-s2.0-85067785051&doi=10.1016%2fj.seizure.2019.06.002&partnerID=40&md5=47f66e466acf11593b946902b4752d63		Article	Final	All Open Access, Bronze	Scopus	2-s2.0-85067785051
31176277	Successful treatment of intractable life-threatening seizures with perampanel in the first case of early myoclonic encephalopathy with a novel de novo SCN1A mutation	2019	Ishikawa N., Tateishi Y., Tani H., Kobayashi Y., Itai T., Miyatake S., Kato M., Matsumoto N., Kobayashi M.	Seizure	71			20	23		3	10.1016/j.seizure.2019.05.024	https://www.scopus.com/inward/record.uri?eid=2-s2.0-85066610845&doi=10.1016%2fj.seizure.2019.05.024&partnerID=40&md5=54c6e00865ffef484a3889d43eea5508		Article	Final	All Open Access, Bronze	Scopus	2-s2.0-85066610845
31041505	Prolonged post-differentiation culture influences the expression and biophysics of Na+ and Ca2+ channels in induced pluripotent stem cell-derived ventricular-like cardiomyocytes	2019	Ross G.R., Rizvi F., Emelyanova L., Tajik A.J., Jahangir A.	Cell and Tissue Research	378	1		59	66		2	10.1007/s00441-019-03030-w	https://www.scopus.com/inward/record.uri?eid=2-s2.0-85065260404&doi=10.1007%2fs00441-019-03030-w&partnerID=40&md5=a8774981459d891b6c88bf78196dbb3a		Article	Final		Scopus	2-s2.0-85065260404
31444242	Dravet syndrome and parkinsonism: A case report investigating the dopaminergic system	2019	Deuel L., Collins A.E., Maa E.H., Barr J.P., Kern D.S.	Neurology	93	13		595	596		2	10.1212/WNL.0000000000008171	https://www.scopus.com/inward/record.uri?eid=2-s2.0-85072598104&doi=10.1212%2fWNL.0000000000008171&partnerID=40&md5=1981a93bb5f048ed530f4b952ebd3952		Note	Final		Scopus	2-s2.0-85072598104
	Diagnostic Yield of Epilepsy Panel Testing in Patients With Seizure Onset Within the First Year of Life	2019	Jang S.S., Kim S.Y., Kim H., Hwang H., Chae J.H., Kim K.J., Kim J.-I., Lim B.C.	Frontiers in Neurology	10		988				9	10.3389/fneur.2019.00988	https://www.scopus.com/inward/record.uri?eid=2-s2.0-85072889282&doi=10.3389%2ffneur.2019.00988&partnerID=40&md5=363cfa1ee43ac038d8b04a09137ac8fe		Article	Final	All Open Access, Gold, Green	Scopus	2-s2.0-85072889282
31549357	Recent Advances in the Drug Treatment of Dravet Syndrome	2019	Wirrell E.C., Nabbout R.	CNS Drugs	33	9		867	881		28	10.1007/s40263-019-00666-8	https://www.scopus.com/inward/record.uri?eid=2-s2.0-85072945933&doi=10.1007%2fs40263-019-00666-8&partnerID=40&md5=d0fe098a7db9d28d6ae942c323e05021		Review	Final		Scopus	2-s2.0-85072945933
31380988	Tackling Epilepsy with High-definition Precision Medicine: A Review	2019	Kearney H., Byrne S., Cavalleri G.L., Delanty N.	JAMA Neurology	76	9		1109	1116		21	10.1001/jamaneurol.2019.2384	https://www.scopus.com/inward/record.uri?eid=2-s2.0-85072587273&doi=10.1001%2fjamaneurol.2019.2384&partnerID=40&md5=a33f15cb67c8c65cfc8e38f71c7174d6		Review	Final		Scopus	2-s2.0-85072587273
	Possible precision medicine implications from genetic testing using combined detection of sequence and intragenic copy number variants in a large cohort with childhood epilepsy	2019	Truty R., Patil N., Sankar R., Sullivan J., Millichap J., Carvill G., Entezam A., Esplin E.D., Fuller A., Hogue M., Johnson B., Khouzam A., Kobayashi Y., Lewis R., Nykamp K., Riethmaier D., Westbrook J., Zeman M., Nussbaum R.L., Aradhya S.	Epilepsia Open	4	3		397	408		25	10.1002/epi4.12348	https://www.scopus.com/inward/record.uri?eid=2-s2.0-85070735410&doi=10.1002%2fepi4.12348&partnerID=40&md5=9f47b0598c84f0bd9c9ec7e3f9b8b98c		Article	Final	All Open Access, Gold, Green	Scopus	2-s2.0-85070735410
31265868	A more efficient conditional mouse model of Dravet syndrome: Implications for epigenetic selection and sex-dependent behaviors	2019	Williams A.D., Kalume F., Westenbroek R.E., Catterall W.A.	Journal of Neuroscience Methods	325		108315				3	10.1016/j.jneumeth.2019.108315	https://www.scopus.com/inward/record.uri?eid=2-s2.0-85068436963&doi=10.1016%2fj.jneumeth.2019.108315&partnerID=40&md5=8ea241b8a17e452e44d7466bedc5436b		Article	Final	All Open Access, Green	Scopus	2-s2.0-85068436963
31280948	Efficacy of antiepileptic drugs in the era of pharmacogenomics: A focus on childhood	2019	Gogou M., Pavlou E.	European Journal of Paediatric Neurology	23	5		674	684		1	10.1016/j.ejpn.2019.06.004	https://www.scopus.com/inward/record.uri?eid=2-s2.0-85068258713&doi=10.1016%2fj.ejpn.2019.06.004&partnerID=40&md5=5b89b2f1f30db219929ffc0ef3360a1f		Review	Final		Scopus	2-s2.0-85068258713
31439038	Clinical exome sequencing identifies two novel mutations of the SCN1A and SCN2A genes in Moroccan patients with epilepsy: A case series	2019	Sahli M., Zrhidri A., Elaloui S.C., Smaili W., Lyahyai J., Oudghiri F.Z., Sefiani A.	Journal of Medical Case Reports	13	1	266				2	10.1186/s13256-019-2203-8	https://www.scopus.com/inward/record.uri?eid=2-s2.0-85071255927&doi=10.1186%2fs13256-019-2203-8&partnerID=40&md5=759f9ada611172ffc0a653f8dd09bd3e		Article	Final	All Open Access, Gold, Green	Scopus	2-s2.0-85071255927
31375088	Exploring the molecular basis of neuronal excitability in a vocal learner	2019	Friedrich S.R., Lovell P.V., Kaser T.M., Mello C.V.	BMC Genomics	20	1	629				2	10.1186/s12864-019-5871-2	https://www.scopus.com/inward/record.uri?eid=2-s2.0-85070232546&doi=10.1186%2fs12864-019-5871-2&partnerID=40&md5=b802f7f7923b9a3eab7d64099400a18a		Article	Final	All Open Access, Gold, Green	Scopus	2-s2.0-85070232546
31400703	Generation of three human induced pluripotent stem cell (iPSC) lines from three patients with Dravet syndrome carrying distinct SCN1A gene mutations	2019	Schuster J., Fatima A., Sobol M., Norradin F.H., Laan L., Dahl N.	Stem Cell Research	39		101523				3	10.1016/j.scr.2019.101523	https://www.scopus.com/inward/record.uri?eid=2-s2.0-85071996556&doi=10.1016%2fj.scr.2019.101523&partnerID=40&md5=b29cccb46aac434fbaac341cc8df02d3		Article	Final	All Open Access, Gold, Green	Scopus	2-s2.0-85071996556
31302675	Incidence and phenotypes of childhood-onset genetic epilepsies: A prospective population-based national cohort	2019	Symonds J.D., Zuberi S.M., Stewart K., McLellan A., O'Regan M., MacLeod S., Jollands A., Joss S., Kirkpatrick M., Brunklaus A., Pilz D.T., Shetty J., Dorris L., Abu-Arafeh I., Andrew J., Brink P., Callaghan M., Cruden J., Diver L.A., Findlay C., Gardiner S., Grattan R., Lang B., MacDonnell J., McKnight J., Morrison C.A., Nairn L., Slean M.M., Stephen E., Webb A., Vincent A., Wilson M.	Brain	142	8		2303	2318		66	10.1093/brain/awz195	https://www.scopus.com/inward/record.uri?eid=2-s2.0-85070660008&doi=10.1093%2fbrain%2fawz195&partnerID=40&md5=35f2b1be8ca8e6946abc2f551c6d0c44		Article	Final	All Open Access, Hybrid Gold, Green	Scopus	2-s2.0-85070660008
31393404	Mapping the knowledge structure and trends of epilepsy genetics over the past decade: A co-word analysis based on medical subject headings terms	2019	Gan J., Cai Q., Galer P., Ma D., Chen X., Huang J., Bao S., Luo R., Zhang Q.	Medicine (United States)	98	32	e16782				18	10.1097/MD.0000000000016782	https://www.scopus.com/inward/record.uri?eid=2-s2.0-85070552096&doi=10.1097%2fMD.0000000000016782&partnerID=40&md5=31605be90fe97751c20b6fcc4fdd00f8		Article	Final	All Open Access, Gold, Green	Scopus	2-s2.0-85070552096
31054517	De novo SCN1A, SCN8A, and CLCN2 mutations in childhood absence epilepsy	2019	Xie H., Su W., Pei J., Zhang Y., Gao K., Li J., Ma X., Zhang Y., Wu X., Jiang Y.	Epilepsy Research	154			55	61		3	10.1016/j.eplepsyres.2019.04.005	https://www.scopus.com/inward/record.uri?eid=2-s2.0-85064923274&doi=10.1016%2fj.eplepsyres.2019.04.005&partnerID=40&md5=d3b2c59b52faeb3d10592e8719b2084d		Article	Final		Scopus	2-s2.0-85064923274
30945278	The combination of whole-exome sequencing and copy number variation sequencing enables the diagnosis of rare neurological disorders	2019	Jiao Q., Sun H., Zhang H., Wang R., Li S., Sun D., Yang X.-A., Jin Y.	Clinical Genetics	96	2		140	150		16	10.1111/cge.13548	https://www.scopus.com/inward/record.uri?eid=2-s2.0-85064630505&doi=10.1111%2fcge.13548&partnerID=40&md5=02641c5880c07e953392889b46595ac5		Article	Final		Scopus	2-s2.0-85064630505
31022638	The therapeutic effect of stiripentol in Gabrg2 +/Q390X mice associated with epileptic encephalopathy	2019	Warner T.A., Smith N.K., Kang J.-Q.	Epilepsy Research	154			8	12		2	10.1016/j.eplepsyres.2019.04.006	https://www.scopus.com/inward/record.uri?eid=2-s2.0-85064476109&doi=10.1016%2fj.eplepsyres.2019.04.006&partnerID=40&md5=a1ef76395cf803aefe7d371f1fff2c3a		Article	Final	All Open Access, Bronze, Green	Scopus	2-s2.0-85064476109
30885820	MicroRNA-132 regulates total protein of Nav1.1 and Nav1.2 in the hippocampus and cortex of rat with chronic cerebral hypoperfusion	2019	Hu X.-L., Wang X.-X., Zhu Y.-M., Xuan L.-N., Peng L.-W., Liu Y.-Q., Yang H., Yang C., Jiao L., Hang P.-Z., Sun L.-H.	Behavioural Brain Research	366			118	125		7	10.1016/j.bbr.2019.03.026	https://www.scopus.com/inward/record.uri?eid=2-s2.0-85063351179&doi=10.1016%2fj.bbr.2019.03.026&partnerID=40&md5=073930037cecc47c1b640d4c7c820251		Article	Final		Scopus	2-s2.0-85063351179
31282864	Vasoactive intestinal peptide-expressing interneurons are impaired in a mouse model of dravet syndrome	2019	Goff K.M., Goldberg E.M.	eLife	8		e46846				15	10.7554/eLife.46846	https://www.scopus.com/inward/record.uri?eid=2-s2.0-85069890492&doi=10.7554%2feLife.46846&partnerID=40&md5=5bbbf0f27674bd20bdb2496fcebd1ed8		Article	Final	All Open Access, Gold, Green	Scopus	2-s2.0-85069890492
31144463	Influence of common SCN1A promoter variants on the severity of SCN1A-related phenotypes	2019	de Lange I.M., Weuring W., van ‘t Slot R., Gunning B., Sonsma A.C.M., McCormack M., de Kovel C., van Gemert L.J.J.M., Mulder F., van Kempen M.J.A., Knoers N.V.A.M., Brilstra E.H., Koeleman B.P.C.	Molecular Genetics and Genomic Medicine	7	7	e00727				4	10.1002/mgg3.727	https://www.scopus.com/inward/record.uri?eid=2-s2.0-85068897436&doi=10.1002%2fmgg3.727&partnerID=40&md5=e0ffae62fa356b54012e58fed89d5dd7		Article	Final	All Open Access, Gold, Green	Scopus	2-s2.0-85068897436
	Beyond Dravet Syndrome: Characterization of a Novel, More Severe SCN1A-Linked Epileptic Encephalopathy	2019	Beck V.C., Hull J.M., Isom L.L.	Epilepsy Currents	19	4		266	268		4	10.1177/1535759719858339	https://www.scopus.com/inward/record.uri?eid=2-s2.0-85068621052&doi=10.1177%2f1535759719858339&partnerID=40&md5=dee43980e1e40fd88dfbdf72ec7df150		Article	Final	All Open Access, Gold, Green	Scopus	2-s2.0-85068621052
31102827	A novel variant in SCN1A gene associated with Dravet syndrome	2019	Pathirana B.A.P.S., Hettiarachchi D., Neththikumara N.F., Ratnayake P.D., Dissanayake V.H.W.	Seizure	69			213	214			10.1016/j.seizure.2019.05.003	https://www.scopus.com/inward/record.uri?eid=2-s2.0-85065531531&doi=10.1016%2fj.seizure.2019.05.003&partnerID=40&md5=a64f86cac8d466f5b2b34770e06d3f60		Article	Final	All Open Access, Bronze	Scopus	2-s2.0-85065531531
30117335	Mesial Temporal Sclerosis in SCN1A-Related Epilepsy: Two Long-Term EEG Case Studies	2019	Tiefes A.M., Hartlieb T., Tacke M., von Stülpnagel-Steinbeis C., Larsen L.H.G., Hao Q., Dahl H.A., Neubauer B.A., Gerstl L., Kudernatsch M., Kluger G.J., Borggraefe I.	Clinical EEG and Neuroscience	50	4		267	272		9	10.1177/1550059418794347	https://www.scopus.com/inward/record.uri?eid=2-s2.0-85052602010&doi=10.1177%2f1550059418794347&partnerID=40&md5=b4dcadff0b4965f208c614b5fbbde81f		Article	Final		Scopus	2-s2.0-85052602010
31226929	Advances in genetics of migraine	2019	Sutherland H.G., Albury C.L., Griffiths L.R.	Journal of Headache and Pain	20	1	72				28	10.1186/s10194-019-1017-9	https://www.scopus.com/inward/record.uri?eid=2-s2.0-85068526277&doi=10.1186%2fs10194-019-1017-9&partnerID=40&md5=fa617bf8f3c5b2ddfb31c63e5bef7998		Review	Final	All Open Access, Gold, Green	Scopus	2-s2.0-85068526277
31009440	Genetic and phenotypic characteristics of SCN1A -related epilepsy in Chinese children	2019	Fang Z.-X., Hong S.-Q., Li T.-S., Wang J., Xie L.-L., Han W., Jiang L.	NeuroReport	30	9		671	680		2	10.1097/WNR.0000000000001259	https://www.scopus.com/inward/record.uri?eid=2-s2.0-85066163700&doi=10.1097%2fWNR.0000000000001259&partnerID=40&md5=75e39bcef5e8b55e8315b348db5cd2ea		Article	Final		Scopus	2-s2.0-85066163700
	Double somatic mosaicism in a child with Dravet syndrome	2019	Muir A.M., King C., Schneider A.L., Buttar A.S., Scheffer I.E., Sadleir L.G., Mefford H.C.	Neurology: Genetics	5	3	e333				1	10.1212/NXG.0000000000000333	https://www.scopus.com/inward/record.uri?eid=2-s2.0-85070330637&doi=10.1212%2fNXG.0000000000000333&partnerID=40&md5=0ff32064808343735e82c3b094d40e76		Article	Final	All Open Access, Gold, Green	Scopus	2-s2.0-85070330637
31077350	Parental mosaicism in epilepsies due to alleged de novo variants	2019	Møller R.S., Liebmann N., Larsen L.H.G., Stiller M., Hentschel J., Kako N., Abdin D., Di Donato N., Pal D.K., Zacher P., Syrbe S., Dahl H.A., Lemke J.R.	Epilepsia	60	6		e63	e66		15	10.1111/epi.15187	https://www.scopus.com/inward/record.uri?eid=2-s2.0-85065675388&doi=10.1111%2fepi.15187&partnerID=40&md5=ddda591f02d662d0ea8be06cb28ef480		Article	Final	All Open Access, Green	Scopus	2-s2.0-85065675388
30087451	Somatic mutations in the human brain: implications for psychiatric research	2019	Nishioka M., Bundo M., Iwamoto K., Kato T.	Molecular Psychiatry	24	6		839	856		13	10.1038/s41380-018-0129-y	https://www.scopus.com/inward/record.uri?eid=2-s2.0-85052522876&doi=10.1038%2fs41380-018-0129-y&partnerID=40&md5=2a9adbb9d7befa81923ac48f8f151892		Review	Final	All Open Access, Hybrid Gold, Green	Scopus	2-s2.0-85052522876
	Is Targeting of Compensatory Ion Channel Gene Expression a Viable Therapeutic Strategy for Dravet Syndrome?	2019	Isom L.L.	Epilepsy Currents	19	3		193	195		3	10.1177/1535759719844780	https://www.scopus.com/inward/record.uri?eid=2-s2.0-85065226360&doi=10.1177%2f1535759719844780&partnerID=40&md5=74e105d832669b493c8e5f5931e57d83		Note	Final	All Open Access, Gold, Green	Scopus	2-s2.0-85065226360
30870727	Longitudinal change of cardiac electrical and autonomic function and potential risk factors in children with dravet syndrome	2019	Lyu S.Y., Nam S.O., Lee Y.-J., Kim G., Kim Y.A., Kong J., Ko A., Kim Y.M., Yeon G.M.	Epilepsy Research	152			11	17		5	10.1016/j.eplepsyres.2019.02.018	https://www.scopus.com/inward/record.uri?eid=2-s2.0-85062708017&doi=10.1016%2fj.eplepsyres.2019.02.018&partnerID=40&md5=8d04de0af0f300e297cfd3e6c8f7cf7a		Article	Final		Scopus	2-s2.0-85062708017
30870728	Identifying mutations in epilepsy genes: Impact on treatment selection	2019	Perucca P., Perucca E.	Epilepsy Research	152			18	30		45	10.1016/j.eplepsyres.2019.03.001	https://www.scopus.com/inward/record.uri?eid=2-s2.0-85062620511&doi=10.1016%2fj.eplepsyres.2019.03.001&partnerID=40&md5=dd33637db58dc897df685bdd37d33c1d		Review	Final		Scopus	2-s2.0-85062620511
30803845	The Ketogenic and Modified Atkins Diet Therapy for Children With Refractory Epilepsy of Genetic Etiology	2019	Jagadish S., Payne E.T., Wong-Kisiel L., Nickels K.C., Eckert S., Wirrell E.C.	Pediatric Neurology	94			32	37		9	10.1016/j.pediatrneurol.2018.12.012	https://www.scopus.com/inward/record.uri?eid=2-s2.0-85061826415&doi=10.1016%2fj.pediatrneurol.2018.12.012&partnerID=40&md5=3a6f3460626f87c66ce47d42c84f1fed		Article	Final		Scopus	2-s2.0-85061826415
30693367	SCN1A and SCN2A polymorphisms are associated with response to valproic acid in Chinese epilepsy patients	2019	Shi L., Zhu M., Li H., Wen Z., Chen X., Luo J., Lin C., Zhang Z.	European Journal of Clinical Pharmacology	75	5		655	663		8	10.1007/s00228-019-02633-0	https://www.scopus.com/inward/record.uri?eid=2-s2.0-85060780350&doi=10.1007%2fs00228-019-02633-0&partnerID=40&md5=f3074cfa1df730b67edc1112ecc6c772		Article	Final		Scopus	2-s2.0-85060780350
30659983	A two-hit story: Seizures and genetic mutation interaction sets phenotype severity in SCN1A epilepsies	2019	Salgueiro-Pereira A.R., Duprat F., Pousinha P.A., Loucif A., Douchamps V., Regondi C., Ayrault M., Eugie M., Stunault M.I., Escayg A., Goutagny R., Gnatkovsky V., Frassoni C., Marie H., Bethus I., Mantegazza M.	Neurobiology of Disease	125			31	44		19	10.1016/j.nbd.2019.01.006	https://www.scopus.com/inward/record.uri?eid=2-s2.0-85060330824&doi=10.1016%2fj.nbd.2019.01.006&partnerID=40&md5=3e9e9ccab2f810c6118e9f9bd9e1dd32		Article	Final		Scopus	2-s2.0-85060330824
	Treatment of Dravet syndrome [Therapie des Dravet-Syndroms]	2019	von Spiczak S., Stephani U.	Zeitschrift fur Epileptologie	32	2		107	115		4	10.1007/s10309-018-0236-4	https://www.scopus.com/inward/record.uri?eid=2-s2.0-85058345182&doi=10.1007%2fs10309-018-0236-4&partnerID=40&md5=af97a37fc765acb65c33a4d2cf513d6d		Review	Final		Scopus	2-s2.0-85058345182
29522854	Chronic Amyloid β Oligomer Infusion Evokes Sustained Inflammation and Microglial Changes in the Rat Hippocampus via NLRP3	2019	Fekete C., Vastagh C., Dénes Á., Hrabovszky E., Nyiri G., Kalló I., Liposits Z., Sárvári M.	Neuroscience	405			35	46		13	10.1016/j.neuroscience.2018.02.046	https://www.scopus.com/inward/record.uri?eid=2-s2.0-85044161402&doi=10.1016%2fj.neuroscience.2018.02.046&partnerID=40&md5=3bda6ec169e0855884a869d86ac3b96c		Article	Final	All Open Access, Green	Scopus	2-s2.0-85044161402
30977854	Use of a Dynamic Genetic Testing Approach for Childhood-Onset Epilepsy	2019	Balciuniene J., DeChene E.T., Akgumus G., Romasko E.J., Cao K., Dubbs H.A., Mulchandani S., Spinner N.B., Conlin L.K., Marsh E.D., Goldberg E., Helbig I., Sarmady M., Abou Tayoun A.	JAMA network open	2	4		e192129			18	10.1001/jamanetworkopen.2019.2129	https://www.scopus.com/inward/record.uri?eid=2-s2.0-85064844899&doi=10.1001%2fjamanetworkopen.2019.2129&partnerID=40&md5=c5e7268ee9a4ea66d07dcf07a28d355d		Article	Final	All Open Access, Gold, Green	Scopus	2-s2.0-85064844899
30900478	Stiripentol for the treatment of seizures associated with Dravet syndrome	2019	Chiron C.	Expert Review of Neurotherapeutics	19	4		301	310		9	10.1080/14737175.2019.1593142	https://www.scopus.com/inward/record.uri?eid=2-s2.0-85063868417&doi=10.1080%2f14737175.2019.1593142&partnerID=40&md5=15cadd0abb9dc1063c6d2694e9b2e6d4		Article	Final		Scopus	2-s2.0-85063868417
31025941	Disordered breathing in a mouse model of Dravet syndrome	2019	Kuo F.-S., Cleary C.M., Loturco J.J., Chen X., Mulkey D.K.	eLife	8		e43387				21	10.7554/eLife.43387	https://www.scopus.com/inward/record.uri?eid=2-s2.0-85065808750&doi=10.7554%2feLife.43387&partnerID=40&md5=adb27e8853cd6479006d8eba13e77140		Article	Final	All Open Access, Gold, Green	Scopus	2-s2.0-85065808750
30977726	SCN1A mutations in focal epilepsy with auditory features: widening the spectrum of GEFS plus	2019	Bisulli F., Licchetta L., Baldassari S., Muccioli L., Marconi C., Cantalupo G., Myers C., Menghi V., Minardi R., Caporali L., Marini C., Guerrini R., Mefford H.C., Tinuper P., Pippucci T.	Epileptic Disorders	21	2		185	191		2	10.1684/epd.2019.1046	https://www.scopus.com/inward/record.uri?eid=2-s2.0-85065025950&doi=10.1684%2fepd.2019.1046&partnerID=40&md5=a7d33f062c44440bd2923b894acc3059		Article	Final		Scopus	2-s2.0-85065025950
30779207	SCN1A gain of function in early infantile encephalopathy	2019	Berecki G., Bryson A., Terhag J., Maljevic S., Gazina E.V., Hill S.L., Petrou S.	Annals of Neurology	85	4		514	525		27	10.1002/ana.25438	https://www.scopus.com/inward/record.uri?eid=2-s2.0-85062716050&doi=10.1002%2fana.25438&partnerID=40&md5=3b575aa35bf5c085ecde8f949eb70ed0		Article	Final	All Open Access, Green	Scopus	2-s2.0-85062716050
29986598	Gain of function of sporadic/familial hemiplegic migraine-causing SCN1A mutations: Use of an optimized cDNA	2019	Bertelli S., Barbieri R., Pusch M., Gavazzo P.	Cephalalgia	39	4		477	488		10	10.1177/0333102418788336	https://www.scopus.com/inward/record.uri?eid=2-s2.0-85049887959&doi=10.1177%2f0333102418788336&partnerID=40&md5=f2d74373ffb64f419480fcc32111bc1e		Article	Final		Scopus	2-s2.0-85049887959
	Time of Day and a Ketogenic Diet Influence Susceptibility to SUDEP in Scn1aR1407X/+ Mice	2019	Teran F.A., Kim Y., Crotts M.S., Bravo E., Emaus K.J., Richerson G.B.	Frontiers in Neurology	10		278				11	10.3389/fneur.2019.00278	https://www.scopus.com/inward/record.uri?eid=2-s2.0-85074275890&doi=10.3389%2ffneur.2019.00278&partnerID=40&md5=3c00d36d70a55779f6a0c909ed259a19		Article	Final	All Open Access, Gold, Green	Scopus	2-s2.0-85074275890
	Multimodal Analysis of SCN1A Missense Variants Improves Interpretation of Clinically Relevant Variants in Dravet Syndrome	2019	Gonsales M.C., Montenegro M.A., Preto P., Guerreiro M.M., Coan A.C., Quast M.P., Carvalho B.S., Lopes-Cendes I.	Frontiers in Neurology	10		289				4	10.3389/fneur.2019.00289	https://www.scopus.com/inward/record.uri?eid=2-s2.0-85075737008&doi=10.3389%2ffneur.2019.00289&partnerID=40&md5=0455ae71c92ef907b687b124290fa8cc		Article	Final	All Open Access, Gold, Green	Scopus	2-s2.0-85075737008
30737342	Clinical spectrum of STX1B -related epileptic disorders	2019	Wolking S., May P., Mei D., Møller R.S., Balestrini S., Helbig K.L., Altuzarra C.D., Chatron N., Kaiwar C., Stöhr K., Widdess-Walsh P., Mendelsohn B.A., Numis A., Cilio M.R., Van Paesschen W., Svendsen L.L., Oates S., Hughes E., Goyal S., Brown K., Sifuentes Saenz M., Dorn T., Muhle H., Pagnamenta A.T., Vavoulis D.V., Knight S.J.L., Taylor J.C., Canevini M.P., Darra F., Gavrilova R.H., Powis Z., …	Neurology	92	11		E1238	E1249		21	10.1212/WNL.0000000000007089	https://www.scopus.com/inward/record.uri?eid=2-s2.0-85062816784&doi=10.1212%2fWNL.0000000000007089&partnerID=40&md5=bcc61622563f26dfc6e57ef3da64def8		Article	Final	All Open Access, Hybrid Gold, Green	Scopus	2-s2.0-85062816784
30835363	Association of single nucleotide polymorphisms of SCN1A gene with therapeutic effect of carbamazepine among ethnic Zhuang Chinese patients with epilepsy	2019	Huang J., Qian Z., Chen H., Huang Q., Huang L., Liu G., Tang X.	Chinese Journal of Medical Genetics	36	3		271	274		4	10.3760/cma.j.issn.1003-9406.2019.03.020	https://www.scopus.com/inward/record.uri?eid=2-s2.0-85062430680&doi=10.3760%2fcma.j.issn.1003-9406.2019.03.020&partnerID=40&md5=ab50d835b3b6d2e269f16f3040111ade		Article	Final		Scopus	2-s2.0-85062430680
	Exome sequencing identifies molecular diagnosis in children with drug-resistant epilepsy	2019	Tsang M.H.-Y., Leung G.K.-C., Ho A.C.-C., Yeung K.-S., Mak C.C.-Y., Pei S.L.-C., Yu M.H.-C., Kan A.S.-Y., Chan K.Y.-K., Kwong K.L., Lee S.-L., Yung A.W.-Y., Fung C.-W., Chung B.H.-Y.	Epilepsia Open	4	1		63	72		10	10.1002/epi4.12282	https://www.scopus.com/inward/record.uri?eid=2-s2.0-85062422573&doi=10.1002%2fepi4.12282&partnerID=40&md5=90221868b544eb7b846da1825ceaba09		Article	Final	All Open Access, Gold, Green	Scopus	2-s2.0-85062422573
	C57BL/6J and C57BL/6N substrains differentially influence phenotype severity in the Scn1a+/− mouse model of Dravet syndrome	2019	Kang S.K., Hawkins N.A., Kearney J.A.	Epilepsia Open	4	1		164	169		16	10.1002/epi4.12287	https://www.scopus.com/inward/record.uri?eid=2-s2.0-85062383300&doi=10.1002%2fepi4.12287&partnerID=40&md5=c647c6a107d5dc92191fb0a20fdfc01e		Article	Final	All Open Access, Gold, Green	Scopus	2-s2.0-85062383300
30817475	What is the role of cannabidiol in refractory epilepsy?	2019	Lafleur K.M., Nemec E.C.	Journal of the American Academy of Physician Assistants	32	3		16	18			10.1097/01.JAA.0000553393.36249.df	https://www.scopus.com/inward/record.uri?eid=2-s2.0-85061774836&doi=10.1097%2f01.JAA.0000553393.36249.df&partnerID=40&md5=9071db2032106faecfc0bd6161386584		Article	Final		Scopus	2-s2.0-85061774836
30776697	Gene mutational analysis in a cohort of Chinese children with unexplained epilepsy: Identification of a new KCND3 phenotype and novel genes causing Dravet syndrome	2019	Wang J., Wen Y., Zhang Q., Yu S., Chen Y., Wu X., Zhang Y., Bao X.	Seizure	66			26	30		12	10.1016/j.seizure.2019.01.025	https://www.scopus.com/inward/record.uri?eid=2-s2.0-85061549034&doi=10.1016%2fj.seizure.2019.01.025&partnerID=40&md5=b6e1451b65b70682ce1185656a62a336		Article	Final	All Open Access, Bronze	Scopus	2-s2.0-85061549034
30735520	In vivo, in vitro and in silico correlations of four de novo SCN1A missense mutations	2019	Nissenkorn A., Almog Y., Adler I., Safrin M., Brusel M., Marom M., Bercovich S., Yakubovich D., Tzadok M., Ben-Zeev B., Rubinstein M.	PLoS ONE	14	2	e0211901				9	10.1371/journal.pone.0211901	https://www.scopus.com/inward/record.uri?eid=2-s2.0-85061232970&doi=10.1371%2fjournal.pone.0211901&partnerID=40&md5=455bf6aaba622291607e32d557c5d3d0		Article	Final	All Open Access, Gold, Green	Scopus	2-s2.0-85061232970
30660939	Genetic testing in a cohort of patients with potential epilepsy with myoclonic-atonic seizures	2019	Angione K., Eschbach K., Smith G., Joshi C., Demarest S.	Epilepsy Research	150			70	77		6	10.1016/j.eplepsyres.2019.01.008	https://www.scopus.com/inward/record.uri?eid=2-s2.0-85060078177&doi=10.1016%2fj.eplepsyres.2019.01.008&partnerID=40&md5=43a2fa05d7c15aeda9b1299ac56af09c		Article	Final		Scopus	2-s2.0-85060078177
30660056	Sudden unexpected death in GEFS+ families with sodium channel pathogenic variants	2019	Myers K.A., Shevell M.I., Sébire G.	Epilepsy Research	150			66	69		6	10.1016/j.eplepsyres.2019.01.009	https://www.scopus.com/inward/record.uri?eid=2-s2.0-85059963621&doi=10.1016%2fj.eplepsyres.2019.01.009&partnerID=40&md5=f38fb32cb4f92bd04dabd52ba2c3317b		Article	Final		Scopus	2-s2.0-85059963621
30612077	Early infantile SCN1A epileptic encephalopathy: Expanding the genotype-phenotype correlations	2019	Spagnoli C., Frattini D., Rizzi S., Salerno G.G., Fusco C.	Seizure	65			62	64		1	10.1016/j.seizure.2019.01.002	https://www.scopus.com/inward/record.uri?eid=2-s2.0-85059331761&doi=10.1016%2fj.seizure.2019.01.002&partnerID=40&md5=fd97afe11defcd43838e091cda87edf8		Article	Final	All Open Access, Bronze	Scopus	2-s2.0-85059331761
30605865	Curcumin's antiepileptic effect, and alterations in Na v 1.1 and Na v 1.6 expression in iron-induced epilepsy	2019	Kumar V., Prakash C., Singh R., Sharma D.	Epilepsy Research	150			7	16		7	10.1016/j.eplepsyres.2018.12.007	https://www.scopus.com/inward/record.uri?eid=2-s2.0-85059292265&doi=10.1016%2fj.eplepsyres.2018.12.007&partnerID=40&md5=51a198a0be27990f39e16b572924298c		Article	Final		Scopus	2-s2.0-85059292265
	Data on mutations and Clinical features in SCN1A or SCN2A gene	2019	Kong Y., Yan K., Hu L., Wang M., Dong X., Lu Y., Wu B., Wang H., Yang L., Zhou W.	Data in Brief	22			492	501		2	10.1016/j.dib.2018.08.122	https://www.scopus.com/inward/record.uri?eid=2-s2.0-85059228172&doi=10.1016%2fj.dib.2018.08.122&partnerID=40&md5=cd23f17cab706c0fb2ece4ea7d588fd0		Data Paper	Final	All Open Access, Gold, Green	Scopus	2-s2.0-85059228172
30529264	RNA-seq Analysis of the SCN1A-KO Model based on CRISPR/Cas9 Genome Editing Technology	2019	Shi X., He W., Guo S., Zhang B., Ren S., Liu K., Sun T., Cui J.	Neuroscience	398			1	11		5	10.1016/j.neuroscience.2018.11.052	https://www.scopus.com/inward/record.uri?eid=2-s2.0-85058380850&doi=10.1016%2fj.neuroscience.2018.11.052&partnerID=40&md5=34f9c8b7517576d55ada76b86e6ca880		Article	Final		Scopus	2-s2.0-85058380850
30368457	Assessment of parental mosaicism in SCN1A -related epilepsy by single-molecule molecular inversion probes and next-generation sequencing	2019	De Lange I.M., Koudijs M.J., Van'T Slot R., Sonsma A.C.M., Mulder F., Carbo E.C., Van Kempen M.J.A., Nijman I.J., Ernst R.F., Savelberg S.M.C., Knoers N.V.A.M., Brilstra E.H., Koeleman B.P.C.	Journal of Medical Genetics	56	2		75	80		9	10.1136/jmedgenet-2018-105672	https://www.scopus.com/inward/record.uri?eid=2-s2.0-85055661366&doi=10.1136%2fjmedgenet-2018-105672&partnerID=40&md5=12e2ebc246c7522e0b26dcbba4fbda82		Article	Final		Scopus	2-s2.0-85055661366
30269941	Individualized treatment approaches: Fenfluramine, a novel antiepileptic medication for the treatment of seizures in Dravet syndrome	2019	Polster T.	Epilepsy and Behavior	91			99	102		21	10.1016/j.yebeh.2018.08.021	https://www.scopus.com/inward/record.uri?eid=2-s2.0-85054040330&doi=10.1016%2fj.yebeh.2018.08.021&partnerID=40&md5=d81a966cce2d71480f3fc0aadb2c4023		Review	Final	All Open Access, Hybrid Gold	Scopus	2-s2.0-85054040330
30673603	Erratum: Augmented Reticular Thalamic Bursting and Seizures in Scn1a-Dravet Syndrome (Cell Reports (2019) 26(1) (54–64.e6), (S2211124718319296), (10.1016/j.celrep.2018.12.018))	2019	Ritter-Makinson S., Clemente-Perez A., Higashikubo B., Cho F.S., Holden S.S., Bennett E., Chkhaidze A., Eelkman Rooda O.H.J., Cornet M.-C., Hoebeek F.E., Yamakawa K., Cilio M.R., Delord B., Paz J.T.	Cell Reports	26	4		1071			1	10.1016/j.celrep.2019.01.037	https://www.scopus.com/inward/record.uri?eid=2-s2.0-85060113244&doi=10.1016%2fj.celrep.2019.01.037&partnerID=40&md5=a922793419d71ea0c5bc8bd62d64e2e0		Erratum	Final	All Open Access, Gold, Green	Scopus	2-s2.0-85060113244
30605686	Augmented Reticular Thalamic Bursting and Seizures in Scn1a-Dravet Syndrome	2019	Ritter-Makinson S., Clemente-Perez A., Higashikubo B., Cho F.S., Holden S.S., Bennett E., Chkaidze A., Eelkman Rooda O.H.J., Cornet M.-C., Hoebeek F.E., Yamakawa K., Cilio M.R., Delord B., Paz J.T.	Cell Reports	26	1		54	6.40E+07		12	10.1016/j.celrep.2018.12.018	https://www.scopus.com/inward/record.uri?eid=2-s2.0-85059167001&doi=10.1016%2fj.celrep.2018.12.018&partnerID=40&md5=3a4b24790073521b53afbe65461a49ce		Article	Final	All Open Access, Gold, Green	Scopus	2-s2.0-85059167001
32105008	Ataxia, tremor, intellectual disability: A case of STXBP1 encephalopathy with a new mutation	2019	Değerliyurt A., Kesen G.G., Ceylaner S.	Turkish Journal of Pediatrics	61	5		757	759		1	10.24953/turkjped.2019.05.015	https://www.scopus.com/inward/record.uri?eid=2-s2.0-85080062329&doi=10.24953%2fturkjped.2019.05.015&partnerID=40&md5=ee6b56b9eb6a12c3e95c10e182a5d6a6		Article	Final	All Open Access, Bronze	Scopus	2-s2.0-85080062329
	Malformations of cortical development and epilepsy in children	2019	Luna B., Felty Q., Roy D., Bhatia S., Ragheb J., Miller I., Jayakar P.	Encyclopedia of Environmental Health				211	218			10.1016/B978-0-12-409548-9.11744-0	https://www.scopus.com/inward/record.uri?eid=2-s2.0-85079557095&doi=10.1016%2fB978-0-12-409548-9.11744-0&partnerID=40&md5=bb395de76033fb294b0eb210f27def32		Book Chapter	Final		Scopus	2-s2.0-85079557095
30027842	Migraine: Genetic variants and clinical phenotypes	2019	Rainero I., Vacca A., Govone F., Gai A., Pinessi L., Rubino E.	Current Medicinal Chemistry	26	34		6207	6221		7	10.2174/0929867325666180719120215	https://www.scopus.com/inward/record.uri?eid=2-s2.0-85076981583&doi=10.2174%2f0929867325666180719120215&partnerID=40&md5=04c31797633d7da6d2eedb6f91f06ece		Review	Final		Scopus	2-s2.0-85076981583
31662442	A genome-wide search for gene-by-obesity interaction loci of dyslipidemia in Koreans shows diverse genetic risk alleles	2019	Kang M., Sung J.	Journal of Lipid Research	60	12		2090	2101			10.1194/jlr.P119000226	https://www.scopus.com/inward/record.uri?eid=2-s2.0-85076126176&doi=10.1194%2fjlr.P119000226&partnerID=40&md5=96e020054fe1cfad36bd0fe059f3f433		Article	Final	All Open Access, Hybrid Gold, Green	Scopus	2-s2.0-85076126176
31533007	Case studies in neuroscience: A novel amino acid duplication in the NH2terminus of the brain sodium channel NaV1.1 underlying Dravet syndrome	2019	Angus M., Peters C.H., Poburko D., Brimble E., Spelbrink E.M., Ruben P.C.	Journal of Neurophysiology	122	5		1975	1980			10.1152/jn.00491.2019	https://www.scopus.com/inward/record.uri?eid=2-s2.0-85074184346&doi=10.1152%2fjn.00491.2019&partnerID=40&md5=2ffd0431372b56fca184c98848078f08		Article	Final	All Open Access, Green	Scopus	2-s2.0-85074184346
31729702	Clinical and genetic aspect of 30 tunisian families with febrile seizures [Etude clinique et génétique de 30 familles tunisiennes avec crises fébriles]	2019	Feki F.K., Fendri-Kriaa N., Kolsi D., Rabai A., Fakhfakh F., Triki C.C.	Tunisie Medicale	97	4		525	532		1		https://www.scopus.com/inward/record.uri?eid=2-s2.0-85073468308&partnerID=40&md5=f135776c6a0192dd78d49ede62d816da		Article	Final		Scopus	2-s2.0-85073468308
31607539	dCas9-Based Scn1a Gene Activation Restores Inhibitory Interneuron Excitability and Attenuates Seizures in Dravet Syndrome Mice	2019	Colasante G., Lignani G., Brusco S., Di Berardino C., Carpenter J., Giannelli S., Valassina N., Bido S., Ricci R., Castoldi V., Marenna S., Church T., Massimino L., Morabito G., Benfenati F., Schorge S., Leocani L., Kullmann D.M., Broccoli V.	Molecular Therapy							51	10.1016/j.ymthe.2019.08.018	https://www.scopus.com/inward/record.uri?eid=2-s2.0-85073144209&doi=10.1016%2fj.ymthe.2019.08.018&partnerID=40&md5=e77f0a92d175e70c329c262855ccad6a		Article	Article in Press	All Open Access, Hybrid Gold, Green	Scopus	2-s2.0-85073144209
31588875	Pharmacogenetics and the treatment of epilepsy: What do we know?	2019	Božina N., Sporiš I.S., Božina T., Klarica-Domjanović I., Tvrdeić A., Sporiš D.	Pharmacogenomics	20	15		1093	1101		3	10.2217/pgs-2019-0085	https://www.scopus.com/inward/record.uri?eid=2-s2.0-85072914764&doi=10.2217%2fpgs-2019-0085&partnerID=40&md5=aa06931d0b8599a00c9eef1862f1bc48		Review	Final		Scopus	2-s2.0-85072914764
	Phisiopatology of epilepsy: Genetics and environment	2019	Orive G.L.R., Hechavarria S.A.C., Reyes I.M.	Revista Cubana de Investigaciones Biomedicas	38	1							https://www.scopus.com/inward/record.uri?eid=2-s2.0-85071619517&partnerID=40&md5=2c3517015d917f11a23fdef4091d47d2		Article	Final		Scopus	2-s2.0-85071619517
31371349	Genomic testing in pediatric epilepsy	2019	Thodeson D.M., Park J.Y.	Cold Spring Harbor Molecular Case Studies	5	4					4	10.1101/mcs.a004135	https://www.scopus.com/inward/record.uri?eid=2-s2.0-85070774739&doi=10.1101%2fmcs.a004135&partnerID=40&md5=dd20ba8ba3e41cf76ecc969d6fb30e0d		Review	Final	All Open Access, Gold, Green	Scopus	2-s2.0-85070774739
31346088	Hippocampal deletion of NaV1.1 channels in mice causes thermal seizures and cognitive deficit characteristic of Dravet Syndrome	2019	Stein R.E., Kaplan J.S., Li J., Catterall W.A.	Proceedings of the National Academy of Sciences of the United States of America	116	33		16571	16576		13	10.1073/pnas.1906833116	https://www.scopus.com/inward/record.uri?eid=2-s2.0-85070709080&doi=10.1073%2fpnas.1906833116&partnerID=40&md5=9a9e8c827141c36949536a4b7e0da82e		Article	Final	All Open Access, Bronze, Green	Scopus	2-s2.0-85070709080
31402621	Donepezil increases resistance to induced seizures in a mouse model of Dravet syndrome	2019	Wong J.C., Thelin J.T., Escayg A.	Annals of Clinical and Translational Neurology	6	8		1566	1571		8	10.1002/acn3.50848	https://www.scopus.com/inward/record.uri?eid=2-s2.0-85070462164&doi=10.1002%2facn3.50848&partnerID=40&md5=708c8bf0e966a9ab7edbb49ecc88792d		Article	Final	All Open Access, Gold, Green	Scopus	2-s2.0-85070462164
	The efficacy of ketogenic diet in 60 Chinese patients with dravet syndrome	2019	Tian X., Chen J., Zhang J., Yang X., Ji T., Zhang Y., Wu Y., Fang F., Wu X., Zhang Y.	Frontiers in Neurology	10	JUN	625				9	10.3389/fneur.2019.00625	https://www.scopus.com/inward/record.uri?eid=2-s2.0-85069169111&doi=10.3389%2ffneur.2019.00625&partnerID=40&md5=c8e22c04c3da52221cad3fb2019d1601		Article	Final	All Open Access, Gold, Green	Scopus	2-s2.0-85069169111
31273778	Clinical utility of multigene panel testing in adults with epilepsy and intellectual disability	2019	Borlot F., de Almeida B.I., Combe S.L., Andrade D.M., Filloux F.M., Myers K.A.	Epilepsia	60	8		1661	1669		14	10.1111/epi.16273	https://www.scopus.com/inward/record.uri?eid=2-s2.0-85068620573&doi=10.1111%2fepi.16273&partnerID=40&md5=b4a21c24f1b8ee500e3de0b66f73d8ac		Article	Final		Scopus	2-s2.0-85068620573
	Transcriptional dysregulation study reveals a core network involving the progression of Alzheimer's disease	2019	Meng G., Mei H.	Frontiers in Aging Neuroscience	11	MAY	101				5	10.3389/fnagi.2019.00101	https://www.scopus.com/inward/record.uri?eid=2-s2.0-85068341866&doi=10.3389%2ffnagi.2019.00101&partnerID=40&md5=2e4436700d6c0abf29719f57b6e09d56		Article	Final	All Open Access, Gold, Green	Scopus	2-s2.0-85068341866
	The clinical and genetic features of co-occurring epilepsy and autism spectrum disorder in Chinese Children	2019	Long S., Zhou H., Li S., Wang T., Ma Y., Li C., Zhou Y., Zhou S., Wu B., Wang Y.	Frontiers in Neurology	10	MAY	505				8	10.3389/fneur.2019.00505	https://www.scopus.com/inward/record.uri?eid=2-s2.0-85068264606&doi=10.3389%2ffneur.2019.00505&partnerID=40&md5=5f5f7734dfe4dd60b8fc48338d8d65a0		Article	Final	All Open Access, Gold, Green	Scopus	2-s2.0-85068264606
31045243	Potentiating a2 subunit containing perisomatic GABAA receptors protects against seizures in a mouse model of Dravet syndrome	2019	Nomura T., Hawkins N.A., Kearney J.A., George A.L., Jr., Contractor A.	Journal of Physiology	597	16		4293	4307		8	10.1113/JP277651	https://www.scopus.com/inward/record.uri?eid=2-s2.0-85066093156&doi=10.1113%2fJP277651&partnerID=40&md5=3a5d3ce631114c31bc464ed1caa4aa0d		Article	Final	All Open Access, Bronze, Green	Scopus	2-s2.0-85066093156
30921204	SCN1B and SCN2B gene variants analysis in dravet syndrome patients Analysis of 22 cases	2019	Gong J.-E., Liao H.-M., Long H.-Y., Li X.-M., Long L.-L., Zhou L., Gu W.-P., Lu S.-H., Qu Q., Yang L.-M., Xiao B., Qu J.	Medicine (United States)	98	13	e14974				3	10.1097/MD.0000000000014974	https://www.scopus.com/inward/record.uri?eid=2-s2.0-85064107782&doi=10.1097%2fMD.0000000000014974&partnerID=40&md5=653bbf0a1f6600022a1c283c246f8f44		Article	Final	All Open Access, Gold, Green	Scopus	2-s2.0-85064107782
	Dravet Syndrome in Lebanon: First Report on Cases with SCN1A Mutations	2019	Alame S., El-Houwayek E., Nava C., Sabbagh S., Fawaz A., Gillart A.-C., Hasbini D., Depienne C., Mégarbané A.	Case Reports in Medicine	2019		5270503					10.1155/2019/5270503	https://www.scopus.com/inward/record.uri?eid=2-s2.0-85061335310&doi=10.1155%2f2019%2f5270503&partnerID=40&md5=5c7f3f65e4eff04f447313c63f972118		Article	Final	All Open Access, Gold, Green	Scopus	2-s2.0-85061335310
	Dravet Syndrome: A Developmental and Epileptic Encephalopathy	2019	Lopez-Santiago L., Isom L.L.	Epilepsy Currents	19	1		51	53		7	10.1177/1535759718822038	https://www.scopus.com/inward/record.uri?eid=2-s2.0-85061197372&doi=10.1177%2f1535759718822038&partnerID=40&md5=2da0a48a6049ce14a8924d7171f4cc9f		Note	Final	All Open Access, Gold, Green	Scopus	2-s2.0-85061197372
30431232	The Role of Protocadherin 19 (PCDH19) in Neurodevelopment and in the Pathophysiology of Early Infantile Epileptic Encephalopathy-9 (EIEE9)	2019	Gerosa L., Francolini M., Bassani S., Passafaro M.	Developmental Neurobiology	79	1		75	84		12	10.1002/dneu.22654	https://www.scopus.com/inward/record.uri?eid=2-s2.0-85059832645&doi=10.1002%2fdneu.22654&partnerID=40&md5=2ab0f6f322cf813aeafcec560f8710bc		Review	Final		Scopus	2-s2.0-85059832645
30578097	Behavior problems and health-related quality of life in Dravet syndrome	2019	Sinoo C., de Lange I.M.-L., Westers P., Gunning W.B., Jongmans M.J., Brilstra E.H.	Epilepsy and Behavior	90			217	227		14	10.1016/j.yebeh.2018.11.029	https://www.scopus.com/inward/record.uri?eid=2-s2.0-85058664830&doi=10.1016%2fj.yebeh.2018.11.029&partnerID=40&md5=eb491ffb155456719a392d73e383fdbb		Article	Final		Scopus	2-s2.0-85058664830
30527252	Outcomes and comorbidities of SCN1A-related seizure disorders	2019	de Lange I.M., Gunning B., Sonsma A.C.M., van Gemert L., van Kempen M., Verbeek N.E., Sinoo C., Nicolai J., Knoers N.V.A.M., Koeleman B.P.C., Brilstra E.H.	Epilepsy and Behavior	90			252	259		17	10.1016/j.yebeh.2018.09.041	https://www.scopus.com/inward/record.uri?eid=2-s2.0-85057799778&doi=10.1016%2fj.yebeh.2018.09.041&partnerID=40&md5=031dd823ee4ee8364165e7b874dbc92b		Article	Final	All Open Access, Hybrid Gold, Green	Scopus	2-s2.0-85057799778
30347190	Gene expression profiling in a mouse model of Dravet syndrome	2019	Hawkins N.A., Calhoun J.D., Huffman A.M., Kearney J.A.	Experimental Neurology	311			247	256		14	10.1016/j.expneurol.2018.10.010	https://www.scopus.com/inward/record.uri?eid=2-s2.0-85055516530&doi=10.1016%2fj.expneurol.2018.10.010&partnerID=40&md5=0336359b8534f21bab02acaf105de55b		Article	Final	All Open Access, Green	Scopus	2-s2.0-85055516530
30370865	Understanding genotypes and phenotypes of the mutations in voltage-gated sodium channel α subunits in epilepsy	2019	Feng Y., Zhang S., Zhang Z., Guo J., Tan Z., Zhu Y., Tao J., Ji Y.-H.	CNS and Neurological Disorders - Drug Targets	18	4		266	272		6	10.2174/1871527317666181026164825	https://www.scopus.com/inward/record.uri?eid=2-s2.0-85049871473&doi=10.2174%2f1871527317666181026164825&partnerID=40&md5=a13a18132b2cb7c90a872a43200ee91c		Review	Final		Scopus	2-s2.0-85049871473
29895856	Evaluating the pathogenic potential of genes with de novo variants in epileptic encephalopathies	2019	He N., Lin Z.-J., Wang J., Wei F., Meng H., Liu X.-R., Chen Q., Su T., Shi Y.-W., Yi Y.-H., Liao W.-P.	Genetics in Medicine	21	1		17	27		19	10.1038/s41436-018-0011-y	https://www.scopus.com/inward/record.uri?eid=2-s2.0-85048365743&doi=10.1038%2fs41436-018-0011-y&partnerID=40&md5=9c1b69ffa24f1889d02cae11aa4ceb5d		Review	Final	All Open Access, Hybrid Gold, Green	Scopus	2-s2.0-85048365743
30413604	Association between SCN1A polymorphism rs3812718 and valproic acid resistance in epilepsy children: A case-control study and meta-analysis	2018	Wang Z.J., Chen J., Chen H.L., Zhang L.Y., Xu D., Jiang W.T.	Bioscience Reports	38	6	BSR20181654				4	10.1042/BSR20181654	https://www.scopus.com/inward/record.uri?eid=2-s2.0-85058893436&doi=10.1042%2fBSR20181654&partnerID=40&md5=507500d6c8c4245467c8fdc899fa3de4		Article	Final	All Open Access, Gold, Green	Scopus	2-s2.0-85058893436
30526861	Aberrant Inclusion of a Poison Exon Causes Dravet Syndrome and Related SCN1A-Associated Genetic Epilepsies	2018	Carvill G.L., Engel K.L., Ramamurthy A., Cochran J.N., Roovers J., Stamberger H., Lim N., Schneider A.L., Hollingsworth G., Holder D.H., Regan B.M., Lawlor J., Lagae L., Ceulemans B., Bebin E.M., Nguyen J., Striano P., Zara F., Helbig I., Møller R.S., von Spiczak S., Muhle H., Caglayan H., Sterbova K., Craiu D., Hoffman D., Lehesjoki A.-E., Selmer K., Depienne C., Lemke J., Marini C., Guerrini R.…	American Journal of Human Genetics	103	6		1022	1029		34	10.1016/j.ajhg.2018.10.023	https://www.scopus.com/inward/record.uri?eid=2-s2.0-85057473913&doi=10.1016%2fj.ajhg.2018.10.023&partnerID=40&md5=62fc50b579eed24f67e36d44b61caecd		Article	Final	All Open Access, Bronze, Green	Scopus	2-s2.0-85057473913
30558019	Clinical and molecular analysis of epilepsy-related genes in patients with Dravet syndrome	2018	Jiang T., Shen Y., Chen H., Yuan Z., Mao S., Gao F.	Medicine (United States)	97	50	e13565				8	10.1097/MD.0000000000013565	https://www.scopus.com/inward/record.uri?eid=2-s2.0-85058735579&doi=10.1097%2fMD.0000000000013565&partnerID=40&md5=525e7d134c86981458aa773bd4484475		Article	Final	All Open Access, Gold, Green	Scopus	2-s2.0-85058735579
30060894	First report on the association of SCN1A mutation, childhood schizophrenia and autism spectrum disorder without epilepsy	2018	Papp-Hertelendi R., Tényi T., Hadzsiev K., Hau L., Benyus Z., Csábi G.	Psychiatry Research	270			1175	1176		2	10.1016/j.psychres.2018.07.028	https://www.scopus.com/inward/record.uri?eid=2-s2.0-85057727613&doi=10.1016%2fj.psychres.2018.07.028&partnerID=40&md5=aaef7b46b15a4bd93140837e84f53b58		Letter	Final		Scopus	2-s2.0-85057727613
30448857	From molecules to medicines: the dawn of targeted therapies for genetic epilepsies	2018	Demarest S.T., Brooks-Kayal A.	Nature Reviews Neurology	14	12		735	745		22	10.1038/s41582-018-0099-3	https://www.scopus.com/inward/record.uri?eid=2-s2.0-85056763227&doi=10.1038%2fs41582-018-0099-3&partnerID=40&md5=b51ac058b71faadfe45668e0648e624a		Review	Final		Scopus	2-s2.0-85056763227
30182498	Genotype and phenotype analysis using an epilepsy-associated gene panel in Chinese pediatric epilepsy patients	2018	Miao P., Feng J., Guo Y., Wang J., Xu X., Wang Y., Li Y., Gao L., Zheng C., Cheng H.	Clinical Genetics	94	6		512	520		16	10.1111/cge.13441	https://www.scopus.com/inward/record.uri?eid=2-s2.0-85054677948&doi=10.1111%2fcge.13441&partnerID=40&md5=2d5e735419f865b3ab45110d6c48c63e		Article	Final		Scopus	2-s2.0-85054677948
	Current Treatment Strategies and Future Treatment Options for Dravet Syndrome	2018	Ziobro J., Eschbach K., Sullivan J.E., Knupp K.G.	Current Treatment Options in Neurology	20	12	52				18	10.1007/s11940-018-0537-y	https://www.scopus.com/inward/record.uri?eid=2-s2.0-85054672483&doi=10.1007%2fs11940-018-0537-y&partnerID=40&md5=45cc04dd2960db62fd549f73d91a1149		Review	Final		Scopus	2-s2.0-85054672483
	Incorporating epilepsy genetics into clinical practice: A 360°evaluation	2018	Oates S., Tang S., Rosch R., Lear R., Hughes E.F., Williams R.E., Larsen L.H.G., Hao Q., Dahl H.A., Møller R.S., Pal D.K.	npj Genomic Medicine	3	1	13				25	10.1038/s41525-018-0052-9	https://www.scopus.com/inward/record.uri?eid=2-s2.0-85047058205&doi=10.1038%2fs41525-018-0052-9&partnerID=40&md5=fc1043e2994c6a73e787d1aeb8bb7084		Article	Final	All Open Access, Gold, Green	Scopus	2-s2.0-85047058205
29317669	Selective targeting of Scn8a prevents seizure development in a mouse model of mesial temporal lobe epilepsy	2018	Wong J.C., Makinson C.D., Lamar T., Cheng Q., Wingard J.C., Terwilliger E.F., Escayg A.	Scientific Reports	8	1	126				18	10.1038/s41598-017-17786-0	https://www.scopus.com/inward/record.uri?eid=2-s2.0-85040574548&doi=10.1038%2fs41598-017-17786-0&partnerID=40&md5=9bcc09b74c4f44dde269b73a7289785f		Article	Final	All Open Access, Gold, Green	Scopus	2-s2.0-85040574548
	Familial Hemiplegic Migraine Type 3 (FHM3) With an SCN1AMutation in a Chinese Family: A Case Report	2018	Shao N., Zhang H., Wang X., Zhang W., Yu M., Meng H.	Frontiers in Neurology	9	NOV	976				3	10.3389/fneur.2018.00976	https://www.scopus.com/inward/record.uri?eid=2-s2.0-85056865701&doi=10.3389%2ffneur.2018.00976&partnerID=40&md5=d409db1b2bcf3557c1513172eba16471		Article	Final	All Open Access, Gold, Green	Scopus	2-s2.0-85056865701
30392545	Migraine Headache: Updates and Future Developments	2018	Bohm P.E., Stancampiano F.F., Rozen T.D.	Mayo Clinic Proceedings	93	11		1648	1653		7	10.1016/j.mayocp.2018.09.006	https://www.scopus.com/inward/record.uri?eid=2-s2.0-85055722152&doi=10.1016%2fj.mayocp.2018.09.006&partnerID=40&md5=53c14a710fb517062d838415d1c59eac		Review	Final	All Open Access, Bronze	Scopus	2-s2.0-85055722152
30182801	Evolution of Brain Glucose Metabolic Abnormalities in Children With Epilepsy and SCN1A Gene Variants	2018	Kumar A., Juhász C., Luat A., Govil-Dalela T., Behen M.E., Hicks M.A., Chugani H.T.	Journal of Child Neurology	33	13		832	836		4	10.1177/0883073818796373	https://www.scopus.com/inward/record.uri?eid=2-s2.0-85054894651&doi=10.1177%2f0883073818796373&partnerID=40&md5=06736df32407ff3dbd326648b3cc243a		Article	Final		Scopus	2-s2.0-85054894651
30306542	A novel GABAergic dysfunction in human Dravet syndrome	2018	Ruffolo G., Cifelli P., Roseti C., Thom M., van Vliet E.A., Limatola C., Aronica E., Palma E.	Epilepsia	59	11		2106	2117		21	10.1111/epi.14574	https://www.scopus.com/inward/record.uri?eid=2-s2.0-85054847272&doi=10.1111%2fepi.14574&partnerID=40&md5=524ed67b923120a1de2f77cb41b8c069		Article	Final	All Open Access, Green	Scopus	2-s2.0-85054847272
30321769	Dravet syndrome in South African infants: Tools for an early diagnosis	2018	Esterhuizen A.I., Mefford H.C., Ramesar R.S., Wang S., Carvill G.L., Wilmshurst J.M.	Seizure	62			99	105		8	10.1016/j.seizure.2018.09.010	https://www.scopus.com/inward/record.uri?eid=2-s2.0-85054637291&doi=10.1016%2fj.seizure.2018.09.010&partnerID=40&md5=f0ed5e8129ba317880a4574afaf6749f		Article	Final	All Open Access, Hybrid Gold, Green	Scopus	2-s2.0-85054637291
30176532	[ 18 F]fluorodeoxyglucose-positron emission tomography study of genetically confirmed patients with Dravet syndrome	2018	Haginoya K., Togashi N., Kaneta T., Hino-Fukuyo N., Ishitobi M., Kakisaka Y., Uematsu M., Inui T., Okubo Y., Sato R., Miyabayashi T., Arai A., Ogiwara I., Mazaki E., Yamakawa K., Iinuma K., Kure S.	Epilepsy Research	147			9	14		6	10.1016/j.eplepsyres.2018.08.008	https://www.scopus.com/inward/record.uri?eid=2-s2.0-85052638485&doi=10.1016%2fj.eplepsyres.2018.08.008&partnerID=40&md5=8a91f3766ccfd4616305df9731d14b4c		Article	Final		Scopus	2-s2.0-85052638485
29314583	Novel mutations and phenotypes of epilepsy-associated genes in epileptic encephalopathies	2018	Zhou P., He N., Zhang J.-W., Lin Z.-J., Wang J., Yan L.-M., Meng H., Tang B., Li B.-M., Liu X.-R., Shi Y.-W., Zhai Q.-X., Yi Y.-H., Liao W.-P.	Genes, Brain and Behavior	17	8	e12456				27	10.1111/gbb.12456	https://www.scopus.com/inward/record.uri?eid=2-s2.0-85044227754&doi=10.1111%2fgbb.12456&partnerID=40&md5=63a89c0515fd8e1f295830c5b9cde5e1		Article	Final		Scopus	2-s2.0-85044227754
30353809	Randomized controlled trial of melatonin for sleep disturbance in dravet syndrome: The DREAMS study	2018	Myers K.A., Davey M.J., Ching M., Ellis C., Grinton B.E., Roten A., Lightfoot P.A., Scheffer I.E.	Journal of Clinical Sleep Medicine	14	10		1697	1704		6	10.5664/jcsm.7376	https://www.scopus.com/inward/record.uri?eid=2-s2.0-85055165513&doi=10.5664%2fjcsm.7376&partnerID=40&md5=ed3d2a830e2fa191da7db7d999b436c4		Article	Final	All Open Access, Bronze, Green	Scopus	2-s2.0-85055165513
30305042	De novo mutations in SCN1A are associated with classic Rett syndrome: A case report	2018	Henriksen M.W., Ravn K., Paus B., Von Tetzchner S., Skjeldal O.H.	BMC Medical Genetics	19	1	184				6	10.1186/s12881-018-0700-z	https://www.scopus.com/inward/record.uri?eid=2-s2.0-85054780521&doi=10.1186%2fs12881-018-0700-z&partnerID=40&md5=09a3edf823794102292de408b36974e4		Article	Final	All Open Access, Gold, Green	Scopus	2-s2.0-85054780521
29728980	Backbone resonance assignments of complexes of apo human calmodulin bound to IQ motif peptides of voltage-dependent sodium channels NaV1.1, NaV1.4 and NaV1.7	2018	Isbell H.M., Kilpatrick A.M., Lin Z., Mahling R., Shea M.A.	Biomolecular NMR Assignments	12	2		283	289		6	10.1007/s12104-018-9824-5	https://www.scopus.com/inward/record.uri?eid=2-s2.0-85046487928&doi=10.1007%2fs12104-018-9824-5&partnerID=40&md5=c590f62ac4eea2d8da0ca29c5d7011d1		Article	Final	All Open Access, Green	Scopus	2-s2.0-85046487928
29486580	The contribution of CACNA1A, ATP1A2 and SCN1A mutations in hemiplegic migraine: A clinical and genetic study in Finnish migraine families	2018	Hiekkala M.E., Vuola P., Artto V., Häppölä P., Häppölä E., Vepsäläinen S., Cuenca-León E., Lal D., Gormley P., Hämäläinen E., Ilmavirta M., Nissilä M., Säkö E., Sumelahti M.-L., Harno H., Havanka H., Keski-Säntti P., Färkkilä M., Palotie A., Wessman M., Kaunisto M.A., Kallela M.	Cephalalgia	38	12		1849	1863		16	10.1177/0333102418761041	https://www.scopus.com/inward/record.uri?eid=2-s2.0-85043719790&doi=10.1177%2f0333102418761041&partnerID=40&md5=2721333e046bb4cd185708d9344fcb53		Article	Final	All Open Access, Green	Scopus	2-s2.0-85043719790
29753823	Analysis of differentially changed gene expression in EA.hy926 human endothelial cell after exposure of fine particulate matter on the basis of microarray profile	2018	Wang Y., Xiong L., Wu T., Zhang T., Kong L., Xue Y., Tang M.	Ecotoxicology and Environmental Safety	159			213	220		12	10.1016/j.ecoenv.2018.05.002	https://www.scopus.com/inward/record.uri?eid=2-s2.0-85046787730&doi=10.1016%2fj.ecoenv.2018.05.002&partnerID=40&md5=d18deffa7ec260dc2c5b6d575a2ee487		Article	Final		Scopus	2-s2.0-85046787730
30146492	Channelopathy as a SUDEP Biomarker in Dravet Syndrome Patient-Derived Cardiac Myocytes	2018	Frasier C.R., Zhang H., Offord J., Dang L.T., Auerbach D.S., Shi H., Chen C., Goldman A.M., Eckhardt L.L., Bezzerides V.J., Parent J.M., Isom L.L.	Stem Cell Reports	11	3		626	634		19	10.1016/j.stemcr.2018.07.012	https://www.scopus.com/inward/record.uri?eid=2-s2.0-85053854711&doi=10.1016%2fj.stemcr.2018.07.012&partnerID=40&md5=ebd1a5cc335cdb13e2a173531f6ec687		Article	Final	All Open Access, Gold, Green	Scopus	2-s2.0-85053854711
30185235	Novel and de novo mutations in pediatric refractory epilepsy	2018	Liu J., Tong L., Song S., Niu Y., Li J., Wu X., Zhang J., Zai C.C., Luo F., Wu J., Li H., Wong A.H.C., Sun R., Liu F., Li B.	Molecular Brain	11	1	48				29	10.1186/s13041-018-0392-5	https://www.scopus.com/inward/record.uri?eid=2-s2.0-85053110067&doi=10.1186%2fs13041-018-0392-5&partnerID=40&md5=70fb0cc544f93d6d56a52dc866532403		Article	Final	All Open Access, Gold, Green	Scopus	2-s2.0-85053110067
30104343	A transient developmental window of fast-spiking interneuron dysfunction in a mouse model of dravet syndrome	2018	Favero M., Sotuyo N.P., Lopez E., Kearney J.A., Goldberg E.M.	Journal of Neuroscience	38	36		7912	7927		52	10.1523/JNEUROSCI.0193-18.2018	https://www.scopus.com/inward/record.uri?eid=2-s2.0-85053083051&doi=10.1523%2fJNEUROSCI.0193-18.2018&partnerID=40&md5=e0c461dbe65ae128272766588443111b		Article	Final	All Open Access, Bronze, Green	Scopus	2-s2.0-85053083051
30146301	Sodium Channel SCN3A (NaV1.3) Regulation of Human Cerebral Cortical Folding and Oral Motor Development	2018	Smith R.S., Kenny C.J., Ganesh V., Jang A., Borges-Monroy R., Partlow J.N., Hill R.S., Shin T., Chen A.Y., Doan R.N., Anttonen A.-K., Ignatius J., Medne L., Bönnemann C.G., Hecht J.L., Salonen O., Barkovich A.J., Poduri A., Wilke M., de Wit M.C.Y., Mancini G.M.S., Sztriha L., Im K., Amrom D., Andermann E., Paetau R., Lehesjoki A.-E., Walsh C.A., Lehtinen M.K.	Neuron	99	5		905	9.13E+09		48	10.1016/j.neuron.2018.07.052	https://www.scopus.com/inward/record.uri?eid=2-s2.0-85052667589&doi=10.1016%2fj.neuron.2018.07.052&partnerID=40&md5=965a7da2ae6d52b3006ef47274013528		Article	Final	All Open Access, Bronze, Green	Scopus	2-s2.0-85052667589
	Sporadic hemiplegic migraine with scn1a gene mutation—a case report	2018	Dube M., Lakhotia A.N., Yadav V., Jain R.	European Neurological Review	14	2		108	110			10.17925/USN.2018.14.2.108	https://www.scopus.com/inward/record.uri?eid=2-s2.0-85070702057&doi=10.17925%2fUSN.2018.14.2.108&partnerID=40&md5=9e6d7fb88a85f00c19d66a683daf3d45		Article	Final	All Open Access, Bronze, Green	Scopus	2-s2.0-85070702057
	Sleep related epilepsy and pharmacotherapy: An insight	2018	Kumar J., Solaiman A., Mahakkanukrauh P., Mohamed R., Das S.	Frontiers in Pharmacology	9		1088	1	17		5	10.3389/fphar.2018.01088	https://www.scopus.com/inward/record.uri?eid=2-s2.0-85065830579&doi=10.3389%2ffphar.2018.01088&partnerID=40&md5=80af4e6603ebb5f1f2d7ab8b6749be0f		Review	Final	All Open Access, Gold, Green	Scopus	2-s2.0-85065830579
30142967	The effect of Ca2+, lobe-specificity, and CaMKII on CaM binding to Nav1.1	2018	Li J., Yu Z., Xu J., Feng R., Gao Q., Boczek T., Liu J., Li Z., Wang Q., Lei M., Gong J., Hu H., Minobe E., Ji H.-L., Kameyama M., Guo F.	International Journal of Molecular Sciences	19	9	2495				3	10.3390/ijms19092495	https://www.scopus.com/inward/record.uri?eid=2-s2.0-85052516759&doi=10.3390%2fijms19092495&partnerID=40&md5=e825eef3e49b03ca8a09895a747b58bb		Article	Final	All Open Access, Gold, Green	Scopus	2-s2.0-85052516759
30076230	Selective NaV1.1 activation rescues Dravet syndrome mice from seizures and premature death	2018	Richards K.L., Milligan C.J., Richardson R.J., Jancovski N., Grunnet M., Jacobson L.H., Undheim E.A.B., Mobli M., Chow C.Y., Herzig V., Csoti A., Panyi G., Reid C.A., King G.F., Petrou S.	Proceedings of the National Academy of Sciences of the United States of America	115	34		E8077	E8085		53	10.1073/pnas.1804764115	https://www.scopus.com/inward/record.uri?eid=2-s2.0-85051815682&doi=10.1073%2fpnas.1804764115&partnerID=40&md5=42850f96debfdc88df9d6f0d2906bec5		Article	Final	All Open Access, Hybrid Gold, Green	Scopus	2-s2.0-85051815682
30071822	Heterozygous deletion of SCN2A and SCN3A in a patient with autism spectrum disorder and Tourette syndrome: A case report	2018	Nickel K., Tebartz van Elst L., Domschke K., Gläser B., Stock F., Endres D., Maier S., Riedel A.	BMC Psychiatry	18	1	248				6	10.1186/s12888-018-1822-8	https://www.scopus.com/inward/record.uri?eid=2-s2.0-85051045403&doi=10.1186%2fs12888-018-1822-8&partnerID=40&md5=d7a32721d0afb77f5a3b8b372de32589		Article	Final	All Open Access, Gold, Green	Scopus	2-s2.0-85051045403
30078767	Genetic literacy series: genetic epilepsy with febrile seizures plus	2018	Myers K.A., Scheffer I.E., Berkovic S.F., on behalf of the ILAE Genetics Commission	Epileptic Disorders	20	4		232	238		23	10.1684/epd.2018.0985	https://www.scopus.com/inward/record.uri?eid=2-s2.0-85052501076&doi=10.1684%2fepd.2018.0985&partnerID=40&md5=ee2c3b37312c97ce58c30fac7f3e605f		Article	Final	All Open Access, Bronze	Scopus	2-s2.0-85052501076
29868823	Variability among next-generation sequencing panels for early-life epilepsies	2018	Yuskaitis C.J., Sheidley B.R., Poduri A.	JAMA Pediatrics	172	8		779	780		1	10.1001/jamapediatrics.2018.0769	https://www.scopus.com/inward/record.uri?eid=2-s2.0-85051384027&doi=10.1001%2fjamapediatrics.2018.0769&partnerID=40&md5=d598ebaee15c772500273f9308c31feb		Letter	Final	All Open Access, Bronze, Green	Scopus	2-s2.0-85051384027
29981888	Establishment of a human induced stem cell line (FUi002-A) from Dravet syndrome patient carrying heterozygous R1525X mutation in SCN1A gene	2018	Tanaka Y., Higurashi N., Shirasu N., Yasunaga S., Moreira K.M., Okano H., Hirose S.	Stem Cell Research	31			11	15		3	10.1016/j.scr.2018.06.008	https://www.scopus.com/inward/record.uri?eid=2-s2.0-85049490609&doi=10.1016%2fj.scr.2018.06.008&partnerID=40&md5=d1e364701f909631900910abf56dced1		Article	Final	All Open Access, Gold	Scopus	2-s2.0-85049490609
29990707	Prospective study of the efficacy of a ketogenic diet in 20 patients with Dravet syndrome	2018	Yan N., Xin-Hua W., Lin-Mei Z., Yi-Ming C., Wen-Hui L., Yuan-Feng Z., Shui-Zhen Z.	Seizure	60			144	148		20	10.1016/j.seizure.2018.06.023	https://www.scopus.com/inward/record.uri?eid=2-s2.0-85049311222&doi=10.1016%2fj.seizure.2018.06.023&partnerID=40&md5=a5d2792bf576fb97151bf2e3ac8f1297		Article	Final	All Open Access, Bronze	Scopus	2-s2.0-85049311222
29929108	The adult motor phenotype of Dravet syndrome is associated with mutation of the STXBP1 gene and responds well to cannabidiol treatment	2018	Álvarez Bravo G., Yusta Izquierdo A.	Seizure	60			68	70		6	10.1016/j.seizure.2018.06.010	https://www.scopus.com/inward/record.uri?eid=2-s2.0-85048724710&doi=10.1016%2fj.seizure.2018.06.010&partnerID=40&md5=671bf8a25cbe952b2fd7955968306eff		Article	Final	All Open Access, Bronze	Scopus	2-s2.0-85048724710
29948376	Clinical and genetic study of Tunisian families with genetic generalized epilepsy: contribution of CACNA1H and MAST4 genes	2018	Landoulsi Z., Laatar F., Noé E., Mrabet S., Ben Djebara M., Achaz G., Nava C., Baulac S., Kacem I., Gargouri-Berrechid A., Gouider R., Leguern E.	Neurogenetics	19	3		165	178		4	10.1007/s10048-018-0550-z	https://www.scopus.com/inward/record.uri?eid=2-s2.0-85048371740&doi=10.1007%2fs10048-018-0550-z&partnerID=40&md5=eefd6f0ce8d4940de41b8037253d1c69		Article	Final		Scopus	2-s2.0-85048371740
29783181	Autistic traits in epilepsy models: Why, when and how?	2018	Velíšková J., Silverman J.L., Benson M., Lenck-Santini P.-P.	Epilepsy Research	144			62	70		8	10.1016/j.eplepsyres.2018.05.009	https://www.scopus.com/inward/record.uri?eid=2-s2.0-85047072548&doi=10.1016%2fj.eplepsyres.2018.05.009&partnerID=40&md5=6a88e59ddba6fa4765d47ee6c4d8989f		Review	Final	All Open Access, Bronze, Green	Scopus	2-s2.0-85047072548
29649454	Association between SCN1A and SCN2A mutations and clinical/EEG features in Chinese patients from epilepsy or severe seizures	2018	Kong Y., Yan K., Hu L., Wang M., Dong X., Lu Y., Wu B., Wang H., Yang L., Zhou W.	Clinica Chimica Acta	483			14	19		3	10.1016/j.cca.2018.03.027	https://www.scopus.com/inward/record.uri?eid=2-s2.0-85045560386&doi=10.1016%2fj.cca.2018.03.027&partnerID=40&md5=ac0cff60f05186f72f3050efd8d41f33		Article	Final		Scopus	2-s2.0-85045560386
29571173	Seizure Freedom in Patients with Dravet Syndrome with Contraceptives: A Case Report with Two Patients	2018	Lotte J., Grothe S., Kluger G.J.	Neuropediatrics	49	4		276	278		1	10.1055/s-0038-1636999	https://www.scopus.com/inward/record.uri?eid=2-s2.0-85044346935&doi=10.1055%2fs-0038-1636999&partnerID=40&md5=17c94af9c42ef0aa77bed5e4fd464318		Article	Final		Scopus	2-s2.0-85044346935
29265387	Marked efficacy of combined three-drug therapy (Sodium Valproate, Topiramate and Stiripentol) in a patient with Dravet syndrome	2018	Morimoto M., Shimakawa S., Hashimoto T., Kitaoka T., Kyotani S.	Journal of Clinical Pharmacy and Therapeutics	43	4		571	573		7	10.1111/jcpt.12659	https://www.scopus.com/inward/record.uri?eid=2-s2.0-85038240149&doi=10.1111%2fjcpt.12659&partnerID=40&md5=8af960e6a50486a3cdb37321e33aff5e		Article	Final		Scopus	2-s2.0-85038240149
	The efficacy of ketogenic diet for specific genetic mutation in developmental and epileptic encephalopathy	2018	Ko A., Jung D.E., Kim S.H., Kang H.-C., Lee J.S., Lee S.T., Choi J.R., Kim H.D.	Frontiers in Neurology	9	JUL	530				28	10.3389/fneur.2018.00530	https://www.scopus.com/inward/record.uri?eid=2-s2.0-85050157672&doi=10.3389%2ffneur.2018.00530&partnerID=40&md5=1519e59eb00e799bc7a23689cb47a084		Article	Final	All Open Access, Gold, Green	Scopus	2-s2.0-85050157672
	Gain of function for the SCN1A/HNAv1.1-L1670W mutation responsible for familial hemiplegic migraine	2018	Dhifallah S., Lancaster E., Merrill S., Leroudier N., Mantegazza M., Cestèle S.	Frontiers in Molecular Neuroscience	11		232				16	10.3389/fnmol.2018.00232	https://www.scopus.com/inward/record.uri?eid=2-s2.0-85054833667&doi=10.3389%2ffnmol.2018.00232&partnerID=40&md5=a00b8e572a961044c774115b6443cebb		Article	Final	All Open Access, Gold, Green	Scopus	2-s2.0-85054833667
	Molecular genetic characterization of patients with focal epilepsy using a customized targeted resequencing gene panel	2018	Tsai M.-H., Chan C.-K., Chang Y.-C., Lin C.-H., Liou C.-W., Chang W.-N., Ng C.-C., Lim K.-S., Hwang D.-Y.	Frontiers in Neurology	9	JUL	515				12	10.3389/fneur.2018.00515	https://www.scopus.com/inward/record.uri?eid=2-s2.0-85049653153&doi=10.3389%2ffneur.2018.00515&partnerID=40&md5=d1b5e9d62b65b43147274051374c2adf		Article	Final	All Open Access, Gold, Green	Scopus	2-s2.0-85049653153
29852413	Diagnostic yield of targeted massively parallel sequencing in children with epileptic encephalopathy	2018	Kothur K., Holman K., Farnsworth E., Ho G., Lorentzos M., Troedson C., Gupta S., Webster R., Procopis P.G., Menezes M.P., Antony J., Ardern-Holmes S., Dale R.C., Christodoulou J., Gill D., Bennetts B.	Seizure	59			132	140		30	10.1016/j.seizure.2018.05.005	https://www.scopus.com/inward/record.uri?eid=2-s2.0-85053799064&doi=10.1016%2fj.seizure.2018.05.005&partnerID=40&md5=4e114adc05db61c4906905c03b7de39b		Article	Final	All Open Access, Bronze	Scopus	2-s2.0-85053799064
29873813	Heart rate variability in epilepsy: A potential biomarker of sudden unexpected death in epilepsy risk	2018	Myers K.A., Bello-Espinosa L.E., Symonds J.D., Zuberi S.M., Clegg R., Sadleir L.G., Buchhalter J., Scheffer I.E.	Epilepsia	59	7		1372	1380		53	10.1111/epi.14438	https://www.scopus.com/inward/record.uri?eid=2-s2.0-85049508838&doi=10.1111%2fepi.14438&partnerID=40&md5=56c3f28da6c83da4ff9e2820b15117d7		Article	Final	All Open Access, Green	Scopus	2-s2.0-85049508838
29145747	Two novel families with hemiplegic migraine caused by recurrent SCN1A mutation p.F1499L	2018	Schubert V., Auffenberg E., Biskup S., Jurkat-Rott K., Freilinger T.	Cephalalgia	38	8		1503	1508		4	10.1177/0333102417742365	https://www.scopus.com/inward/record.uri?eid=2-s2.0-85043454350&doi=10.1177%2f0333102417742365&partnerID=40&md5=00ea67222cc9b203902a786ccb6ab5e3		Article	Final		Scopus	2-s2.0-85043454350
29188487	Sodium Metabisulfite: Effects on Ionic Currents and Excitotoxicity	2018	Lai M.-C., Hung T.-Y., Lin K.-M., Sung P.-S., Wu S.-J., Yang C.-S., Wu Y.-J., Tsai J.-J., Wu S.-N., Huang C.-W.	Neurotoxicity Research	34	1					9	10.1007/s12640-017-9844-4	https://www.scopus.com/inward/record.uri?eid=2-s2.0-85035353293&doi=10.1007%2fs12640-017-9844-4&partnerID=40&md5=e1172b943bf45fb5196b484e0640cf65		Article	Final		Scopus	2-s2.0-85035353293
28764992	Impact on GABA systems in monogenetic developmental CNS disorders: Clues to symptomatic treatment	2018	Benke D., Möhler H.	Neuropharmacology	136			46	55		5	10.1016/j.neuropharm.2017.07.030	https://www.scopus.com/inward/record.uri?eid=2-s2.0-85026731271&doi=10.1016%2fj.neuropharm.2017.07.030&partnerID=40&md5=fd81093749c162f558d3282f773e3acc		Review	Final		Scopus	2-s2.0-85026731271
28986278	Synaptopathology in autism spectrum disorders: Complex effects of synaptic genes on neural circuits	2018	Wang X., Kery R., Xiong Q.	Progress in Neuro-Psychopharmacology and Biological Psychiatry	84			398	415		6	10.1016/j.pnpbp.2017.09.026	https://www.scopus.com/inward/record.uri?eid=2-s2.0-85030855907&doi=10.1016%2fj.pnpbp.2017.09.026&partnerID=40&md5=9a1d1fe73393e54387ba17ce317739ca		Review	Final		Scopus	2-s2.0-85030855907
	Preclinical animal models for Dravet syndrome: Seizure phenotypes, comorbidities and drug screening	2018	Griffin A., Hamling K.R., Hong S., Anvar M., Lee L.P., Baraban S.C.	Frontiers in Pharmacology	9	JUN	573				38	10.3389/fphar.2018.00573	https://www.scopus.com/inward/record.uri?eid=2-s2.0-85048053166&doi=10.3389%2ffphar.2018.00573&partnerID=40&md5=151b6c2b7fb71ea0d285f538df55d822		Review	Final	All Open Access, Gold, Green	Scopus	2-s2.0-85048053166
	Clinical phenotype, gene mutation and application of targeted next generation sequencing in patients with early-onset epileptic encephalopathy	2018	Liu X.-J., Zhang P.-Y., Lei M.-F., Wei X.-P., Yu X.-L., Li D., Shu J.-B., Cai C.-Q., Zhang Y.-Q.	Chinese Journal of Contemporary Neurology and Neurosurgery	18	6		428	437			10.3969/j.issn.1672-6731.2018.06.008	https://www.scopus.com/inward/record.uri?eid=2-s2.0-85050225697&doi=10.3969%2fj.issn.1672-6731.2018.06.008&partnerID=40&md5=61c619b44df046f36b962a6786d224e3		Article	Final		Scopus	2-s2.0-85050225697
29750338	Influence of contraindicated medication use on cognitive outcome in Dravet syndrome and age at first afebrile seizure as a clinical predictor in SCN1A-related seizure phenotypes	2018	de Lange I.M., Gunning B., Sonsma A.C.M., van Gemert L., van Kempen M., Verbeek N.E., Nicolai J., Knoers N.V.A.M., Koeleman B.P.C., Brilstra E.H.	Epilepsia	59	6		1154	1165		43	10.1111/epi.14191	https://www.scopus.com/inward/record.uri?eid=2-s2.0-85046744506&doi=10.1111%2fepi.14191&partnerID=40&md5=f249858693bae687d73f806a24213399		Article	Final	All Open Access, Hybrid Gold, Green	Scopus	2-s2.0-85046744506
29500686	Variable epilepsy phenotypes associated with heterozygous mutation in the SCN9A gene: report of two cases	2018	Yang C., Hua Y., Zhang W., Xu J., Xu L., Gao F., Jiang P.	Neurological Sciences	39	6		1113	1115		10	10.1007/s10072-018-3300-y	https://www.scopus.com/inward/record.uri?eid=2-s2.0-85045076628&doi=10.1007%2fs10072-018-3300-y&partnerID=40&md5=55497f914fc55fdd3a1d93abb329607d		Article	Final		Scopus	2-s2.0-85045076628
29582177	Association between two SCN1A polymorphisms and resistance to sodium channel blocking AEDs: a meta-analysis	2018	Bao Y., Liu X., Xiao Z.	Neurological Sciences	39	6		1065	1072		8	10.1007/s10072-018-3308-3	https://www.scopus.com/inward/record.uri?eid=2-s2.0-85044452974&doi=10.1007%2fs10072-018-3308-3&partnerID=40&md5=a8794994d437d7994e1993e02da9c933		Article	Final		Scopus	2-s2.0-85044452974
29473155	Stiripentol efficacy and safety in Dravet syndrome: a 12-year observational study	2018	Myers K.A., Lightfoot P., Patil S.G., Cross J.H., Scheffer I.E.	Developmental Medicine and Child Neurology	60	6		574	578		31	10.1111/dmcn.13704	https://www.scopus.com/inward/record.uri?eid=2-s2.0-85042390238&doi=10.1111%2fdmcn.13704&partnerID=40&md5=97195baa3c7b5fd26429badfb8c52a28		Article	Final	All Open Access, Bronze, Green	Scopus	2-s2.0-85042390238
29467100	Epileptogenesis in neonatal brain	2018	Katsarou A.-M., Galanopoulou A.S., Moshé S.L.	Seminars in Fetal and Neonatal Medicine	23	3		159	167		14	10.1016/j.siny.2017.12.004	https://www.scopus.com/inward/record.uri?eid=2-s2.0-85042152306&doi=10.1016%2fj.siny.2017.12.004&partnerID=40&md5=12748986927d1c30b8a76c03209d4bab		Review	Final	All Open Access, Green	Scopus	2-s2.0-85042152306
	A novel ATP1A2 gene variant associated with pure sporadic hemiplegic migraine improved after patent foramen ovale closure: A case report	2018	Perrotta A., Gambardella S., Ambrosini A., Anastasio M.G., Albano V., Fornai F., Pierelli F.	Frontiers in Neurology	9	MAY	332					10.3389/fneur.2018.00332	https://www.scopus.com/inward/record.uri?eid=2-s2.0-85047000399&doi=10.3389%2ffneur.2018.00332&partnerID=40&md5=33f76c22e7fd0226f48221b2b0baba35		Article	Final	All Open Access, Gold, Green	Scopus	2-s2.0-85047000399
29804481	Clinical reappraisal of the influence of drug-transporter polymorphisms in epilepsy	2018	Orlandi A., Paolino M.C., Striano P., Parisi P.	Expert Opinion on Drug Metabolism and Toxicology	14	5		505	512		13	10.1080/17425255.2018.1473377	https://www.scopus.com/inward/record.uri?eid=2-s2.0-85047999620&doi=10.1080%2f17425255.2018.1473377&partnerID=40&md5=b659f295e2d69b37058e5ce3235cd9d0		Review	Final		Scopus	2-s2.0-85047999620
29679912	Effects of UGT2B7, SCN1A and CYP3A4 on the therapeutic response of sodium valproate treatment in children with generalized seizures	2018	Feng W., Mei S., Zhu L., Yu Y., Yang W., Gao B., Wu X., Zhao Z., Fang F.	Seizure	58			96	100		10	10.1016/j.seizure.2018.04.006	https://www.scopus.com/inward/record.uri?eid=2-s2.0-85045693149&doi=10.1016%2fj.seizure.2018.04.006&partnerID=40&md5=9d9429b71da6c9bbdc61251d806f206e		Article	Final	All Open Access, Bronze	Scopus	2-s2.0-85045693149
29655203	Diagnostic outcomes for genetic testing of 70 genes in 8565 patients with epilepsy and neurodevelopmental disorders	2018	Lindy A.S., Stosser M.B., Butler E., Downtain-Pickersgill C., Shanmugham A., Retterer K., Brandt T., Richard G., McKnight D.A.	Epilepsia	59	5		1062	1071		90	10.1111/epi.14074	https://www.scopus.com/inward/record.uri?eid=2-s2.0-85045383933&doi=10.1111%2fepi.14074&partnerID=40&md5=7147e8494ca756c9f52ec31c202d26da		Article	Final	All Open Access, Hybrid Gold	Scopus	2-s2.0-85045383933
29605548	SCN1A rs3812718 polymorphism is associated with epilepsy: An updated meta-analysis	2018	Zhi H., Wu C., Yang Z.	Epilepsy Research	142			81	87		2	10.1016/j.eplepsyres.2018.03.016	https://www.scopus.com/inward/record.uri?eid=2-s2.0-85044608406&doi=10.1016%2fj.eplepsyres.2018.03.016&partnerID=40&md5=520b3f1b0d3c98fbaa889ca97fdd4482		Review	Final		Scopus	2-s2.0-85044608406
29578003	Abnormal changes in voltage-gated sodium channels subtypes NaV1.1, NaV1.2, NaV1.3, NaV1.6 and CaM/CaMKII pathway in low-grade astrocytoma	2018	Guan G., Zhao M., Xu X., Boczek T., Mao X., Li Z., Gao Q., Li J., Zhao D., Niu W., Lei L., Guo F.	Neuroscience Letters	674			148	155		4	10.1016/j.neulet.2018.03.047	https://www.scopus.com/inward/record.uri?eid=2-s2.0-85044455894&doi=10.1016%2fj.neulet.2018.03.047&partnerID=40&md5=e2172cf98219b4d7ddba845f3aae01d8		Article	Final		Scopus	2-s2.0-85044455894
29694806	Parental mosaicism in “De Novo” epileptic encephalopathies	2018	Myers C.T., Hollingsworth G., Muir A.M., Schneider A.L., Thuesmunn Z., Knupp A., King C., Lacroix A., Mehaffey M.G., Berkovic S.F., Carvill G.L., Sadleir L.G., Scheffer I.E., Mefford H.C.	New England Journal of Medicine	378	17					52	10.1056/NEJMc1714579	https://www.scopus.com/inward/record.uri?eid=2-s2.0-85046433184&doi=10.1056%2fNEJMc1714579&partnerID=40&md5=85bc94f85628d77f5d58f3d51b06b335		Letter	Final	All Open Access, Green	Scopus	2-s2.0-85046433184
29551491	Nav1.1-Overexpressing Interneuron Transplants Restore Brain Rhythms and Cognition in a Mouse Model of Alzheimer's Disease	2018	Martinez-Losa M., Tracy T.E., Ma K., Verret L., Clemente-Perez A., Khan A.S., Cobos I., Ho K., Gan L., Mucke L., Alvarez-Dolado M., Palop J.J.	Neuron	98	1		75	8.90E+06		68	10.1016/j.neuron.2018.02.029	https://www.scopus.com/inward/record.uri?eid=2-s2.0-85043788370&doi=10.1016%2fj.neuron.2018.02.029&partnerID=40&md5=0f370482b93cf7e123463af4d1a4c86f		Article	Final	All Open Access, Bronze, Green	Scopus	2-s2.0-85043788370
	Dravet syndrome: a sodium channel interneuronopathy	2018	Catterall W.A.	Current Opinion in Physiology	2			42	50		44	10.1016/j.cophys.2017.12.007	https://www.scopus.com/inward/record.uri?eid=2-s2.0-85051034079&doi=10.1016%2fj.cophys.2017.12.007&partnerID=40&md5=0938ce734b2f0328136c9ea0231aeedb		Review	Final	All Open Access, Green	Scopus	2-s2.0-85051034079
	The voltage-gated channelopathies as a paradigm for studying epilepsy-causing genes	2018	Carpenter J.C., Schorge S.	Current Opinion in Physiology	2			71	76			10.1016/j.cophys.2018.01.004	https://www.scopus.com/inward/record.uri?eid=2-s2.0-85051012735&doi=10.1016%2fj.cophys.2018.01.004&partnerID=40&md5=478a60376dea32d3529b5d63b91957b9		Review	Final	All Open Access, Green	Scopus	2-s2.0-85051012735
28837158	High frequency of mosaic pathogenic variants in genes causing epilepsy-related neurodevelopmental disorders	2018	Stosser M.B., Lindy A.S., Butler E., Retterer K., Piccirillo-Stosser C.M., Richard G., McKnight D.A.	Genetics in Medicine	20	4		403	410		63	10.1038/gim.2017.114	https://www.scopus.com/inward/record.uri?eid=2-s2.0-85045190975&doi=10.1038%2fgim.2017.114&partnerID=40&md5=5ab59e4b0e938fb835f930f30b76a84b		Article	Final	All Open Access, Hybrid Gold, Green	Scopus	2-s2.0-85045190975
29601086	SCN1A variants associated with sudden infant death syndrome	2018	Brownstein C.A., Goldstein R.D., Thompson C.H., Haynes R.L., Giles E., Sheidley B., Bainbridge M., Haas E.A., Mena O.J., Lucas J., Schaber B., Holm I.A., George A.L., Kinney H.C., Poduri A.H.	Epilepsia	59	4		e56	e62		14	10.1111/epi.14055	https://www.scopus.com/inward/record.uri?eid=2-s2.0-85044596220&doi=10.1111%2fepi.14055&partnerID=40&md5=a3922c09e79fc5a6f9050c946670428c		Article	Final	All Open Access, Green	Scopus	2-s2.0-85044596220
29466837	Mutations in SCN3A cause early infantile epileptic encephalopathy	2018	Zaman T., Helbig I., Božović I.B., DeBrosse S.D., Bergqvist A.C., Wallis K., Medne L., Maver A., Peterlin B., Helbig K.L., Zhang X., Goldberg E.M.	Annals of Neurology	83	4		703	717		44	10.1002/ana.25188	https://www.scopus.com/inward/record.uri?eid=2-s2.0-85044499536&doi=10.1002%2fana.25188&partnerID=40&md5=bc3eaf3b1a2a4382923853f34d7aea5a		Article	Final	All Open Access, Green	Scopus	2-s2.0-85044499536
29453127	Generation of D1-1 TALEN isogenic control cell line from Dravet syndrome patient iPSCs using TALEN-mediated editing of the SCN1A gene	2018	Tanaka Y., Sone T., Higurashi N., Sakuma T., Suzuki S., Ishikawa M., Yamamoto T., Mitsui J., Tsuji H., Okano H., Hirose S.	Stem Cell Research	28			100	104		7	10.1016/j.scr.2018.01.036	https://www.scopus.com/inward/record.uri?eid=2-s2.0-85041924816&doi=10.1016%2fj.scr.2018.01.036&partnerID=40&md5=cbfc83345bd3dfa5c562d702417cda11		Article	Final	All Open Access, Gold	Scopus	2-s2.0-85041924816
29037745	Genetics update: Monogenetics, polygene disorders and the quest for modifying genes	2018	Symonds J.D., Zuberi S.M.	Neuropharmacology	132			3	19		8	10.1016/j.neuropharm.2017.10.013	https://www.scopus.com/inward/record.uri?eid=2-s2.0-85040458754&doi=10.1016%2fj.neuropharm.2017.10.013&partnerID=40&md5=39fec8620bd8f0c96c0b29ba19d3746e		Review	Final		Scopus	2-s2.0-85040458754
29337050	Impairments in social novelty recognition and spatial memory in mice with conditional deletion of Scn1a in parvalbumin-expressing cells	2018	Tatsukawa T., Ogiwara I., Mazaki E., Shimohata A., Yamakawa K.	Neurobiology of Disease	112			24	34		25	10.1016/j.nbd.2018.01.009	https://www.scopus.com/inward/record.uri?eid=2-s2.0-85040326930&doi=10.1016%2fj.nbd.2018.01.009&partnerID=40&md5=80af2073d9d858d343c9212907d2f6aa		Article	Final		Scopus	2-s2.0-85040326930
29295803	Differential effects on sodium current impairments by distinct SCN1A mutations in GABAergic neurons derived from Dravet syndrome patients	2018	Kim H.W., Quan Z., Kim Y.-B., Cheong E., Kim H.D., Cho M., Jang J., Yoo Y.R., Lee J.S., Kim J.H., Kim Y.I., Kim D.-S., Kang H.-C.	Brain and Development	40	4		287	298		12	10.1016/j.braindev.2017.12.002	https://www.scopus.com/inward/record.uri?eid=2-s2.0-85039703865&doi=10.1016%2fj.braindev.2017.12.002&partnerID=40&md5=303b48e78425c513fd00753a3a71c7d7		Article	Final		Scopus	2-s2.0-85039703865
29518120	Why west? Comparisons of clinical, genetic and molecular features of infants with and without spasms	2018	Berg A.T., Chakravorty S., Koh S., Grinspan Z.M., Shellhaas R.A., Saneto R.P., Wirrell E.C., Coryell J., Chu C.J., Mytinger J.R., Gaillard W.D., Valencia I., Knupp K.G., Loddenkemper T., Sullivan J.E., Poduri A., Millichap J.J., Keator C., Wusthoff C., Ryan N., Dobyns W.B., Hegde M.	PLoS ONE	13	3	e0193599				17	10.1371/journal.pone.0193599	https://www.scopus.com/inward/record.uri?eid=2-s2.0-85043455232&doi=10.1371%2fjournal.pone.0193599&partnerID=40&md5=90232fafe0eb4af66a9e7824c93f5128		Article	Final	All Open Access, Gold, Green	Scopus	2-s2.0-85043455232
29329111	Severe peri-ictal respiratory dysfunction is common in Dravet syndrome	2018	Kim Y., Bravo E., Thirnbeck C.K., Smith-Mellecker L.A., Kim S.H., Gehlbach B.K., Laux L.C., Zhou X., Nordli D.R., Jr., Richerson G.B.	Journal of Clinical Investigation	128	3		1141	1153		49	10.1172/JCI94999	https://www.scopus.com/inward/record.uri?eid=2-s2.0-85042793696&doi=10.1172%2fJCI94999&partnerID=40&md5=c71314232e518ac4e685c5bcadc7b5ec		Article	Final	All Open Access, Bronze, Green	Scopus	2-s2.0-85042793696
29408779	Pathogenic significance of SCN1A splicing variants causing Dravet syndrome: Improving diagnosis with targeted sequencing for variants by in silico analysis	2018	Mahdieh N., Mikaeeli S., Badv R.S., Shirazi A.G., Maleki M., Rabbani B.	Clinical Neurology and Neurosurgery	166			80	90		1	10.1016/j.clineuro.2018.01.030	https://www.scopus.com/inward/record.uri?eid=2-s2.0-85042369508&doi=10.1016%2fj.clineuro.2018.01.030&partnerID=40&md5=9a9e9dc1c0d627daf6a303134e8c0219		Article	Final		Scopus	2-s2.0-85042369508
29455050	Targeted gene panel and genotype-phenotype correlation in children with developmental and epileptic encephalopathy	2018	Ko A., Youn S.E., Kim S.H., Lee J.S., Kim S., Choi J.R., Kim H.D., Lee S.-T., Kang H.-C.	Epilepsy Research	141			48	55		38	10.1016/j.eplepsyres.2018.02.003	https://www.scopus.com/inward/record.uri?eid=2-s2.0-85042192269&doi=10.1016%2fj.eplepsyres.2018.02.003&partnerID=40&md5=6c053759ed3789e66054f6a9fddb28c7		Article	Final		Scopus	2-s2.0-85042192269
29460957	Mosaicism of de novo pathogenic SCN1A variants in epilepsy is a frequent phenomenon that correlates with variable phenotypes	2018	de Lange I.M., Koudijs M.J., van 't Slot R., Gunning B., Sonsma A.C.M., van Gemert L.J.J.M., Mulder F., Carbo E.C., van Kempen M.J.A., Verbeek N.E., Nijman I.J., Ernst R.F., Savelberg S.M.C., Knoers N.V.A.M., Brilstra E.H., Koeleman B.P.C.	Epilepsia	59	3		690	703		30	10.1111/epi.14021	https://www.scopus.com/inward/record.uri?eid=2-s2.0-85042174598&doi=10.1111%2fepi.14021&partnerID=40&md5=89ef3f7b30508f507b74fd657e493462		Article	Final	All Open Access, Hybrid Gold, Green	Scopus	2-s2.0-85042174598
29341473	Somatic mosaic deletions involving SCN1A cause Dravet syndrome	2018	Nakayama T., Ishii A., Yoshida T., Nasu H., Shimojima K., Yamamoto T., Kure S., Hirose S.	American Journal of Medical Genetics, Part A	176	3		657	662		13	10.1002/ajmg.a.38596	https://www.scopus.com/inward/record.uri?eid=2-s2.0-85040739565&doi=10.1002%2fajmg.a.38596&partnerID=40&md5=8171c45d1bd376106da224c6923f98e5		Article	Final		Scopus	2-s2.0-85040739565
29429462	Association en SCN1a rs3812718 polymorphism and generalized epilepsy with febrile seizures plus	2018	Ma Q.-L., Wang B., Chen G.-F., Huang J.-L., Li Y., Cao D.-Z., Liu R.-T.	Chinese Journal of Contemporary Pediatrics	20	2		130	133			10.7499/j.issn.1008-8830.2018.02.010	https://www.scopus.com/inward/record.uri?eid=2-s2.0-85050872693&doi=10.7499%2fj.issn.1008-8830.2018.02.010&partnerID=40&md5=4c58e704c442e108a9538738279d1297		Article	Final		Scopus	2-s2.0-85050872693
29343472	Clinical spectrum of hemiplegic migraine and chances of finding a pathogenic mutation	2018	Pelzer N., Haan J., Stam A.H., Vijfhuizen L.S., Koelewijn S.C., Smagge A., De Vries B., Ferrari M.D., Van Den Maagdenberg A.M.J.M., Terwindt G.M.	Neurology	90	7		e575	e582		27	10.1212/WNL.0000000000004966	https://www.scopus.com/inward/record.uri?eid=2-s2.0-85050027602&doi=10.1212%2fWNL.0000000000004966&partnerID=40&md5=5eb537bb732bb4df7eccbc2fc019b7f8		Article	Final		Scopus	2-s2.0-85050027602
29390993	Efficient strategy for the molecular diagnosis of intractable early-onset epilepsy using targeted gene sequencing	2018	Rim J.H., Kim S.H., Hwang I.S., Kwon S.S., Kim J., Kim H.W., Cho M.J., Ko A., Youn S.E., Kim J., Lee Y.M., Chung H.J., Lee J.S., Kim H.D., Choi J.R., Lee S.-T., Kang H.-C.	BMC medical genomics	11	1	6	6			25	10.1186/s12920-018-0320-7	https://www.scopus.com/inward/record.uri?eid=2-s2.0-85058609896&doi=10.1186%2fs12920-018-0320-7&partnerID=40&md5=1b54f7df2c35e313f346e7a561e12378		Article	Final	All Open Access, Gold, Green	Scopus	2-s2.0-85058609896
29952450	SCN1A variant and cannabidiol use	2018	Reynolds C., Finnegan R., Forman E., King M.D.	Irish Medical Journal	111	2		702					https://www.scopus.com/inward/record.uri?eid=2-s2.0-85042433442&partnerID=40&md5=7148513a6b3de1acf76dd519b5f9191b		Letter	Final		Scopus	2-s2.0-85042433442
	Understanding spreading depression from headache to sudden unexpected death	2018	Cozzolino O., Marchese M., Trovato F., Pracucci E., Ratto G.M., Buzzi M.G., Sicca F., Santorelli F.M.	Frontiers in Neurology	9	FEB	19				23	10.3389/fneur.2018.00019	https://www.scopus.com/inward/record.uri?eid=2-s2.0-85041847034&doi=10.3389%2ffneur.2018.00019&partnerID=40&md5=8fd184ecb213c562d4126e2e07414a65		Review	Final	All Open Access, Gold, Green	Scopus	2-s2.0-85041847034
29353705	Association between SCN1A gene polymorphisms and drug resistant epilepsy in pediatric patients	2018	Margari L., Legrottaglie A.R., Vincenti A., Coppola G., Operto F.F., Buttiglione M., Cassano A., Bartolomeo N., Mariggiò M.A.	Seizure	55			30	35		10	10.1016/j.seizure.2018.01.002	https://www.scopus.com/inward/record.uri?eid=2-s2.0-85041389936&doi=10.1016%2fj.seizure.2018.01.002&partnerID=40&md5=ca13de76b488db12235091e9e237a5b4		Article	Final	All Open Access, Bronze	Scopus	2-s2.0-85041389936
28058944	Epilepsy in hemiplegic migraine: Genetic mutations and clinical implications	2018	Prontera P., Sarchielli P., Caproni S., Bedetti C., Cupini L.M., Calabresi P., Costa C.	Cephalalgia	38	2		361	373		26	10.1177/0333102416686347	https://www.scopus.com/inward/record.uri?eid=2-s2.0-85027279016&doi=10.1177%2f0333102416686347&partnerID=40&md5=86f029b740bf90f5e0c26677189e64d8		Review	Final		Scopus	2-s2.0-85027279016
27956748	Association of rare missense variants in the second intracellular loop of Na v 1.7 sodium channels with familial autism	2018	Rubinstein M., Patowary A., Stanaway I.B., McCord E., Nesbitt R.R., Archer M., Scheuer T., Nickerson D., Raskind W.H., Wijsman E.M., Bernier R., Catterall W.A., Brkanac Z.	Molecular Psychiatry	23	2		231	239		16	10.1038/mp.2016.222	https://www.scopus.com/inward/record.uri?eid=2-s2.0-85004065509&doi=10.1038%2fmp.2016.222&partnerID=40&md5=09e8277b2a31ff93692eb108f95bb6dd		Article	Final	All Open Access, Hybrid Gold, Green	Scopus	2-s2.0-85004065509
31186344	Investigating the therapeutic mechanism of cannabidiol in a human induced pluripotent stem cell (iPSC)-based model of Dravet syndrome	2018	Sun Y., Dolmetsch R.E.	Cold Spring Harbor Symposia on Quantitative Biology	83			185	191		12	10.1101/sqb.2018.83.038174	https://www.scopus.com/inward/record.uri?eid=2-s2.0-85071995909&doi=10.1101%2fsqb.2018.83.038174&partnerID=40&md5=6e472a5b6e2f4f4531d9b78c235a22eb		Article	Final	All Open Access, Gold	Scopus	2-s2.0-85071995909
	Trazodone: A New Antiepileptic Drug for Dravet Syndrome?	2018	Azevedo Kauppila L., Amorim I., Bentes C., Peralta A.R.	International Journal of Epilepsy	5	2		99	103		1	10.1055/s-0039-1677783	https://www.scopus.com/inward/record.uri?eid=2-s2.0-85070306102&doi=10.1055%2fs-0039-1677783&partnerID=40&md5=c43f12ff3b44da6107b72868f42eb93f		Article	Final		Scopus	2-s2.0-85070306102
	A case of Dravet Syndrome with a newly defined mutation in the SCN1A gene [SCN1A geninde yeni bir mutasyonun tanımlandığı Dravet Sendromu olgusu]	2018	Öz Tunçer G., Teber S., Albayrak P., Kutluk M.G., Deda G.	Turk Pediatri Arsivi	53	4		259	262		3	10.5152/TurkPediatriArs.2018.4197	https://www.scopus.com/inward/record.uri?eid=2-s2.0-85065755844&doi=10.5152%2fTurkPediatriArs.2018.4197&partnerID=40&md5=f8235b919d1af1aca81624a94da60c6d		Article	Final	All Open Access, Green	Scopus	2-s2.0-85065755844
	The possible effect of SCN1A and SCN2A genetic variants on carbamazepine response among khyber pakhtunkhwa epileptic patients, Pakistan	2018	Nazish H.R., Ali N., Ullah S.	Therapeutics and Clinical Risk Management	14			2305	2313		5	10.2147/TCRM.S180827	https://www.scopus.com/inward/record.uri?eid=2-s2.0-85058460386&doi=10.2147%2fTCRM.S180827&partnerID=40&md5=5748cd66c6e0ee8f3cbb8505a473021d		Article	Final	All Open Access, Gold, Green	Scopus	2-s2.0-85058460386
	Genetic background of encephalopathy	2018	Ishii A., Hirose S.	Acute Encephalopathy and Encephalitis in Infancy and Its Related Disorders				45	52			10.1016/B978-0-323-53088-0.00006-3	https://www.scopus.com/inward/record.uri?eid=2-s2.0-85054434192&doi=10.1016%2fB978-0-323-53088-0.00006-3&partnerID=40&md5=8a194ae9441b37d4fa645ee376c65bd7		Book Chapter	Final		Scopus	2-s2.0-85054434192
	SCN1A gene variations in epilepsy and migraine patients in Aceh, Indonesia	2018	Lestari N.D., Rahayuningsih E.M., Syahrul S., Emril D.R., Harapan H., Sadewa A.H., Bachtiar A., Sjahrir H.	Polish Annals of Medicine	25	1		41	45			10.29089/2017.17.00001	https://www.scopus.com/inward/record.uri?eid=2-s2.0-85048778042&doi=10.29089%2f2017.17.00001&partnerID=40&md5=8b08343a1072c247cb15ef2c308d400f		Article	Final		Scopus	2-s2.0-85048778042
29478594	Genetics of epilepsy	2018	Nolan D., Fink J.	Handbook of Clinical Neurology	148			467	491		16	10.1016/B978-0-444-64076-5.00030-2	https://www.scopus.com/inward/record.uri?eid=2-s2.0-85045879107&doi=10.1016%2fB978-0-444-64076-5.00030-2&partnerID=40&md5=dde7e5b81914d92e3d2fcf2f7b938d4e		Book Chapter	Final		Scopus	2-s2.0-85045879107
	Can the combination of hyperthermia, seizures and ion channel dysfunction cause fatal post-ictal cerebral edema in patients with SCN1A mutations?	2018	Büren C., Kamp M.A., Munoz-Bendix C., Steiger H.-J., Windolf J., Dibué-Adjei M.	Epilepsy and Behavior Case Reports	9			29	32		3	10.1016/j.ebcr.2017.12.003	https://www.scopus.com/inward/record.uri?eid=2-s2.0-85044940915&doi=10.1016%2fj.ebcr.2017.12.003&partnerID=40&md5=078f0fabc0242066087bd7483e1d9097		Article	Final	All Open Access, Gold, Green	Scopus	2-s2.0-85044940915
28474565	Drug-resistant epilepsy and surgery	2018	Sheng J., Liu S., Qin H., Li B., Zhang X.	Current Neuropharmacology	16	1		17	28		32	10.2174/1570159X15666170504123316	https://www.scopus.com/inward/record.uri?eid=2-s2.0-85042386950&doi=10.2174%2f1570159X15666170504123316&partnerID=40&md5=f41b45b458dfebad7ddca1b9257c4346		Review	Final	All Open Access, Green	Scopus	2-s2.0-85042386950
	SCN1A mutation positive Dravet syndrome, genetic aspects and clinical experiences [Syndróm Dravetovej s mutáciou v SCN1A géne, genetické aspekty a klinické skúsenosti]	2018	Ceská K., Aulická Š., Danhofer P., Horák O., Fajkusová L., Pouchlá S., Ošlejšková H.	Ceska a Slovenska Neurologie a Neurochirurgie	81	1		55	59		1	10.14735/amcsnn201855	https://www.scopus.com/inward/record.uri?eid=2-s2.0-85041741629&doi=10.14735%2famcsnn201855&partnerID=40&md5=d20a5d6a32d1988701d8ba5ee5c9a1a1		Article	Final		Scopus	2-s2.0-85041741629
	Sodium Channelopathies: From Molecular Physiology towards Medical Genetics	2018	Marakhonov A.V., Varenikov G.G., Skoblov M.Y.	Russian Journal of Genetics	54	1		45	56			10.1134/S102279541801009X	https://www.scopus.com/inward/record.uri?eid=2-s2.0-85041410194&doi=10.1134%2fS102279541801009X&partnerID=40&md5=ac11f828ff8109c2637828e8606850a1		Review	Final		Scopus	2-s2.0-85041410194
29144225	Prevalence of Genetic Disorders and GLUT1 Deficiency in a Ketogenic Diet Clinic	2018	Hewson S., Brunga L., Ojeda M.F., Imhof E., Patel J., Zak M., Donner E.J., Kobayashi J., Salomons G.S., Mercimek-Andrews S.	Canadian Journal of Neurological Sciences	45	1		93	96		2	10.1017/cjn.2017.246	https://www.scopus.com/inward/record.uri?eid=2-s2.0-85040772288&doi=10.1017%2fcjn.2017.246&partnerID=40&md5=190d196e4580690bc964553bcfd3650e		Article	Final	All Open Access, Bronze	Scopus	2-s2.0-85040772288
	Efficacy of stiripentol in dravet syndrome with or without SCN1A mutations	2018	Cho M.J., Kwon S.S., Ko A., Lee S.-T., Lee Y.M., Kim H.D., Chung H.J., Kim S.H., Lee J.S., Kim D.-S., Kang H.-C.	Journal of Clinical Neurology (Korea)	14	1		22	28		10	10.3988/jcn.2018.14.1.22	https://www.scopus.com/inward/record.uri?eid=2-s2.0-85040667802&doi=10.3988%2fjcn.2018.14.1.22&partnerID=40&md5=61bd0f7875bdd93574cb8530db9d16c4		Article	Final	All Open Access, Green	Scopus	2-s2.0-85040667802
29115566	Downregulation of microRNA-155 by preoperative administration of valproic acid prevents postoperative seizures by upregulating SCN1A	2018	Zhang Z., Wang Z., Zhang B., Liu Y.	Molecular Medicine Reports	17	1		1375	1381		4	10.3892/mmr.2017.8004	https://www.scopus.com/inward/record.uri?eid=2-s2.0-85034991710&doi=10.3892%2fmmr.2017.8004&partnerID=40&md5=a60637dc8e1706a7a63292ee8806adc4		Article	Final	All Open Access, Bronze	Scopus	2-s2.0-85034991710
	Identification of a Novel Nonsense Variant in the SCN1A Gene that Causes Febrile Seizure Disorder	2018	Jouali F., Marchoudi N., Rouissi A., Fekkak J.	Journal of Pediatric Neurology	16	4		236	238			10.1055/s-0037-1607995	https://www.scopus.com/inward/record.uri?eid=2-s2.0-85033385568&doi=10.1055%2fs-0037-1607995&partnerID=40&md5=a4533dafd766222d26c2d69608b63853		Article	Final		Scopus	2-s2.0-85033385568
28951233	Identification of two mutations in cis in the SCN1A gene in a family showing genetic epilepsy with febrile seizures plus (GEFS+) and idiopathic generalized epilepsy (IGE)	2017	Binini N., Sancini G., Villa C., Dal Magro R., Sansoni V., Rusconi R., Mantegazza M., Grioni D., Talpo F., Toselli M., Combi R.	Brain Research	1677			26	32		6	10.1016/j.brainres.2017.09.023	https://www.scopus.com/inward/record.uri?eid=2-s2.0-85029915634&doi=10.1016%2fj.brainres.2017.09.023&partnerID=40&md5=0a2a25ee0f7aa339c82619ae90739901		Article	Final		Scopus	2-s2.0-85029915634
	Novel bandlike signal abnormality suggestive of heterotopia in patient with a KCNQ1 frameshift mutation	2017	Sabharwal P., Devinsky O., M. Shepherd T.	Epilepsia Open	2	4		481	484		1	10.1002/epi4.12072	https://www.scopus.com/inward/record.uri?eid=2-s2.0-85074853220&doi=10.1002%2fepi4.12072&partnerID=40&md5=07afa9c7dec940699188994954094c72		Note	Final	All Open Access, Gold, Green	Scopus	2-s2.0-85074853220
29188601	Analysis of SCN1A deletions or duplications in patients with Dravet syndrome	2017	Zeng Q., Zhang Y., Yang X., Xu X., Zhang J., Tian X., Liu A., Liu X., Jiang Y., Wu X.	Chinese Journal of Medical Genetics	34	6		787	791			10.3760/cma.j.issn.1003-9406.2017.06.001	https://www.scopus.com/inward/record.uri?eid=2-s2.0-85041913828&doi=10.3760%2fcma.j.issn.1003-9406.2017.06.001&partnerID=40&md5=58162b47c394fce0d5d336287dae7939		Article	Final		Scopus	2-s2.0-85041913828
29258970	Mowat-Wilson syndrome presenting with fever-associated seizures	2017	Seo S.E., Kim S.H., Lee S.T., Choi J.R., Lee J.S., Kim H.D., Kang H.-C.	Epileptic Disorders	19	4		481	485			10.1684/epd.2017.0949	https://www.scopus.com/inward/record.uri?eid=2-s2.0-85041104735&doi=10.1684%2fepd.2017.0949&partnerID=40&md5=d53ead435e6fb750d68ef6710809a6c5		Note	Final		Scopus	2-s2.0-85041104735
29261713	Targeted next-generation sequencing provides novel clues for associated epilepsy and cardiac conduction disorder/SUDEP	2017	Coll M., Striano P., Ferrer-Costa C., Campuzano O., Matés J., del Olmo B., Iglesias A., Pérez-Serra A., Mademont I., Picó F., Oliva A., Brugada R.	PLoS ONE	12	12	e0189618				13	10.1371/journal.pone.0189618	https://www.scopus.com/inward/record.uri?eid=2-s2.0-85038909146&doi=10.1371%2fjournal.pone.0189618&partnerID=40&md5=463b5729294dbae505511e72f39ec002		Article	Final	All Open Access, Gold, Green	Scopus	2-s2.0-85038909146
29142202	Genomic mosaicism in paternal sperm and multiple parental tissues in a Dravet syndrome cohort	2017	Yang X., Liu A., Xu X., Yang X., Zeng Q., Ye A.Y., Yu Z., Wang S., Huang A.Y., Wu X., Wu Q., Wei L., Zhang Y.	Scientific Reports	7	1	15677				28	10.1038/s41598-017-15814-7	https://www.scopus.com/inward/record.uri?eid=2-s2.0-85034450644&doi=10.1038%2fs41598-017-15814-7&partnerID=40&md5=797d33e370d9f76e912cc71e22bdfe08		Article	Final	All Open Access, Gold, Green	Scopus	2-s2.0-85034450644
29127345	The synthetic neuroactive steroid SGE-516 reduces seizure burden and improves survival in a Dravet syndrome mouse model	2017	Hawkins N.A., Lewis M., Hammond R.S., Doherty J.J., Kearney J.A.	Scientific Reports	7	1	15327				12	10.1038/s41598-017-15609-w	https://www.scopus.com/inward/record.uri?eid=2-s2.0-85033553695&doi=10.1038%2fs41598-017-15609-w&partnerID=40&md5=3cd42aa8f1d244dbc05338608f8edb9f		Article	Final	All Open Access, Gold, Green	Scopus	2-s2.0-85033553695
29062094	Genetic Variants Associated with Episodic Ataxia in Korea	2017	Choi K.-D., Kim J.-S., Kim H.-J., Jung I., Jeong S.-H., Lee S.-H., Kim D.U., Kim S.-H., Choi S.Y., Shin J.-H., Kim D.-S., Park K.-P., Kim H.-S., Choi J.-H.	Scientific Reports	7	1	13855				32	10.1038/s41598-017-14254-7	https://www.scopus.com/inward/record.uri?eid=2-s2.0-85032182196&doi=10.1038%2fs41598-017-14254-7&partnerID=40&md5=bfde86fab25ec1c74fd606f1d3c31f63		Article	Final	All Open Access, Gold, Green	Scopus	2-s2.0-85032182196
29056246	Diagnostic Yield From 339 Epilepsy Patients Screened on a Clinical Gene Panel	2017	Butler K.M., da Silva C., Alexander J.J., Hegde M., Escayg A.	Pediatric Neurology	77			61	66		39	10.1016/j.pediatrneurol.2017.09.003	https://www.scopus.com/inward/record.uri?eid=2-s2.0-85031789622&doi=10.1016%2fj.pediatrneurol.2017.09.003&partnerID=40&md5=90ffdc9a4e53590831507f4a81d4264e		Article	Final	All Open Access, Green	Scopus	2-s2.0-85031789622
28593511	De novo exonic duplication of ATP1A2 in Italian patient with hemiplegic migraine: a case report	2017	Gagliardi S., Grieco G.S., Gualandi F., Caniatti L.M., Groppo E., Valente M., Giuseppe N., Neri M., Cereda C.	Journal of Headache and Pain	18	1	63				4	10.1186/s10194-017-0770-x	https://www.scopus.com/inward/record.uri?eid=2-s2.0-85020813369&doi=10.1186%2fs10194-017-0770-x&partnerID=40&md5=1c1e6b045753d71dee41b1e91974ea89		Article	Final	All Open Access, Gold, Green	Scopus	2-s2.0-85020813369
28490751	Unexpected Efficacy of a Novel Sodium Channel Modulator in Dravet Syndrome	2017	Anderson L.L., Hawkins N.A., Thompson C.H., Kearney J.A., George A.L., Jr.	Scientific Reports	7	1	1682				38	10.1038/s41598-017-01851-9	https://www.scopus.com/inward/record.uri?eid=2-s2.0-85019257229&doi=10.1038%2fs41598-017-01851-9&partnerID=40&md5=451302f6226c5c5e577c0e983e5f1ff1		Article	Final	All Open Access, Gold, Green	Scopus	2-s2.0-85019257229
29096607	Hypotonia and intellectual disability without dysmorphic features in a patient with PIGN-related disease	2017	Thiffault I., Zuccarelli B., Welsh H., Yuan X., Farrow E., Zellmer L., Miller N., Soden S., Abdelmoity A., Brodsky R.A., Saunders C.	BMC Medical Genetics	18	1	124				7	10.1186/s12881-017-0481-9	https://www.scopus.com/inward/record.uri?eid=2-s2.0-85032723444&doi=10.1186%2fs12881-017-0481-9&partnerID=40&md5=ea32d1e11271aaa9fde7df931994fcc2		Article	Final	All Open Access, Gold, Green	Scopus	2-s2.0-85032723444
29249505	Early Life Epilepsies are a Comorbidity of Developmental Brain Disorders	2017	Berg A.T., Tarquinio D., Koh S.	Seminars in Pediatric Neurology	24	4		251	263		16	10.1016/j.spen.2017.10.008	https://www.scopus.com/inward/record.uri?eid=2-s2.0-85036635800&doi=10.1016%2fj.spen.2017.10.008&partnerID=40&md5=f20f41457e83ff11916b7efb4938f4b9		Article	Final		Scopus	2-s2.0-85036635800
29190809	Molecular diagnosis of patients with epilepsy and developmental delay using a customized panel of epilepsy genes	2017	Ortega-Moreno L., Giráldez B.G., Soto-Insuga V., Pozo R.L.-D., Rodrigo-Moreno M., Alarcón-Morcillo C., Sánchez-Martín G., Díaz-Gómez E., Guerrero-López R., Serratosa J.M., Lorenzo G., García-Peñas J.J., Ruíz-Falcó M.L., Pérez-Jiménez M.A., Cantarín V., Gil-Nagel A., Toledano R., García-Pérez A., Verdú A., Carrascosa M.C., Vivanco R., Aznar G., Armstrong J., Martorell L., Fons C., García-Cazorla A…	PLoS ONE	12	11	e0188978				40	10.1371/journal.pone.0188978	https://www.scopus.com/inward/record.uri?eid=2-s2.0-85035779496&doi=10.1371%2fjournal.pone.0188978&partnerID=40&md5=50a26ca734f794e534d215459f8f1852		Article	Final	All Open Access, Gold, Green	Scopus	2-s2.0-85035779496
29046322	Pumilio2-deficient mice show a predisposition for epilepsy	2017	Follwaczny P., Schieweck R., Riedemann T., Demleitner A., Straub T., Klemm A.H., Bilban M., Sutor B., Popper B., Kiebler M.A.	DMM Disease Models and Mechanisms	10	11		1333	1342		28	10.1242/dmm.029678	https://www.scopus.com/inward/record.uri?eid=2-s2.0-85034023479&doi=10.1242%2fdmm.029678&partnerID=40&md5=af34de750a790ef61abceb963e2cf2b4		Article	Final	All Open Access, Gold, Green	Scopus	2-s2.0-85034023479
27919014	A novel SCN1A mutation identified in a Chinese family with familial hemiplegic migraine: A case report	2017	Zhang Y., Chen N., Zhou M., Guo J., Guo J., He L.	Cephalalgia	37	13		1294	1298		6	10.1177/0333102416677049	https://www.scopus.com/inward/record.uri?eid=2-s2.0-85033481446&doi=10.1177%2f0333102416677049&partnerID=40&md5=5030324207d1d3fde7d60476b483f5ff		Article	Final		Scopus	2-s2.0-85033481446
29031192	Growth and endocrine function in children with Dravet syndrome	2017	Eschbach K., Scarbro S., Juarez-Colunga E., Allen V., Hsu S., Knupp K.	Seizure	52			117	122		8	10.1016/j.seizure.2017.09.021	https://www.scopus.com/inward/record.uri?eid=2-s2.0-85030995357&doi=10.1016%2fj.seizure.2017.09.021&partnerID=40&md5=92a1c3d5ebe6759cb980f3876d6cd682		Article	Final	All Open Access, Bronze	Scopus	2-s2.0-85030995357
28982531	Parental Perception of Comorbidities in Children With Dravet Syndrome	2017	Knupp K.G., Scarbro S., Wilkening G., Juarez-Colunga E., Kempe A., Dempsey A.	Pediatric Neurology	76			60	65		13	10.1016/j.pediatrneurol.2017.06.008	https://www.scopus.com/inward/record.uri?eid=2-s2.0-85030249126&doi=10.1016%2fj.pediatrneurol.2017.06.008&partnerID=40&md5=aac4bd4069850a604313d865f394b299		Article	Final		Scopus	2-s2.0-85030249126
28832970	Differential binding of tetrodotoxin and its derivatives to voltage-sensitive sodium channel subtypes (Nav1.1 to Nav1.7)	2017	Tsukamoto T., Chiba Y., Wakamori M., Yamada T., Tsunogae S., Cho Y., Sakakibara R., Imazu T., Tokoro S., Satake Y., Adachi M., Nishikawa T., Yotsu-Yamashita M., Konoki K.	British Journal of Pharmacology	174	21		3881	3892		26	10.1111/bph.13985	https://www.scopus.com/inward/record.uri?eid=2-s2.0-85030101672&doi=10.1111%2fbph.13985&partnerID=40&md5=8f8d5414454bae84a1d69ca38e7ed4d1		Article	Final	All Open Access, Bronze, Green	Scopus	2-s2.0-85030101672
28880996	Dravet syndrome and its mimics: Beyond SCN1A	2017	Steel D., Symonds J.D., Zuberi S.M., Brunklaus A.	Epilepsia	58	11		1807	1816		64	10.1111/epi.13889	https://www.scopus.com/inward/record.uri?eid=2-s2.0-85029769813&doi=10.1111%2fepi.13889&partnerID=40&md5=d5e62beaee1a3ef379f1426c4e1f6494		Review	Final		Scopus	2-s2.0-85029769813
28758202	Sodium channel subtypes are differentially localized to pre- and post-synaptic sites in rat hippocampus	2017	Johnson K.W., Herold K.F., Milner T.A., Hemmings H.C., Jr., Platholi J.	Journal of Comparative Neurology	525	16		3563	3578		9	10.1002/cne.24291	https://www.scopus.com/inward/record.uri?eid=2-s2.0-85029575081&doi=10.1002%2fcne.24291&partnerID=40&md5=1d44add35725f1814eb7efcf787ca9ad		Article	Final	All Open Access, Green	Scopus	2-s2.0-85029575081
28865303	Defects at the crossroads of GABAergic signaling in generalized genetic epilepsies	2017	Kang J.-Q.	Epilepsy Research	137			9	18		19	10.1016/j.eplepsyres.2017.08.013	https://www.scopus.com/inward/record.uri?eid=2-s2.0-85028398607&doi=10.1016%2fj.eplepsyres.2017.08.013&partnerID=40&md5=c7406adc48a4082aae13ad1b316254c6		Review	Final	All Open Access, Green	Scopus	2-s2.0-85028398607
28709814	The therapeutic implication of a novel SCN2A mutation associated early-onset epileptic encephalopathy with Rett-like features	2017	Liang J.-S., Lin L.-J., Yang M.-T., Wang J.-S., Lu J.-F.	Brain and Development	39	10		877	881		8	10.1016/j.braindev.2017.06.003	https://www.scopus.com/inward/record.uri?eid=2-s2.0-85021955098&doi=10.1016%2fj.braindev.2017.06.003&partnerID=40&md5=a3f21fee054ee55de36e01d08ac75fb6		Article	Final		Scopus	2-s2.0-85021955098
28973916	Cannabidiol attenuates seizures and social deficits in a mouse model of Dravet syndrome	2017	Kaplan J.S., Stella N., Catterall W.A., Westenbroek R.E.	Proceedings of the National Academy of Sciences of the United States of America	114	42		11229	11234		147	10.1073/pnas.1711351114	https://www.scopus.com/inward/record.uri?eid=2-s2.0-85031773617&doi=10.1073%2fpnas.1711351114&partnerID=40&md5=6a03fc1fba79a911afd888b8d36882d5		Article	Final	All Open Access, Bronze, Green	Scopus	2-s2.0-85031773617
28799511	Treatment of epileptic encephalopathies	2017	Balestrini S., Sisodiya S.M.	Current Pharmaceutical Design	23	37		5667	5690		6	10.2174/1381612823666170809115827	https://www.scopus.com/inward/record.uri?eid=2-s2.0-85043309583&doi=10.2174%2f1381612823666170809115827&partnerID=40&md5=a0b0203b65c1770add0a789d00c8f177		Review	Final		Scopus	2-s2.0-85043309583
29069078	Transcriptomic correlates of neuron electrophysiological diversity	2017	Tripathy S.J., Toker L., Li B., Crichlow C.-L., Tebaykin D., Mancarci B.O., Pavlidis P.	PLoS Computational Biology	13	10	e1005814				19	10.1371/journal.pcbi.1005814	https://www.scopus.com/inward/record.uri?eid=2-s2.0-85032741701&doi=10.1371%2fjournal.pcbi.1005814&partnerID=40&md5=af0c3f0f253b022b3e813e76ef06d6bb		Article	Final	All Open Access, Gold, Green	Scopus	2-s2.0-85032741701
28864458	Optimizing genomic medicine in epilepsy through a gene-customized approach to missense variant interpretation	2017	Traynelis J., Silk M., Wang Q., Berkovic S.F., Liu L., Ascher D.B., Balding D.J., Petrovski S.	Genome Research	27	10		1715	1729		76	10.1101/gr.226589.117	https://www.scopus.com/inward/record.uri?eid=2-s2.0-85030645609&doi=10.1101%2fgr.226589.117&partnerID=40&md5=ed174e33cb0fb12f34a6b17abc45eec9		Article	Final	All Open Access, Hybrid Gold, Green	Scopus	2-s2.0-85030645609
28333919	Exome sequencing-based molecular autopsy of formalin-fixed paraffin-embedded tissue after sudden death	2017	Bagnall R.D., Ingles J., Yeates L., Berkovic S.F., Semsarian C.	Genetics in Medicine	19	10		1127	1133		20	10.1038/gim.2017.15	https://www.scopus.com/inward/record.uri?eid=2-s2.0-85025824171&doi=10.1038%2fgim.2017.15&partnerID=40&md5=f5295abd74258f00d412c364ecae6e9a		Article	Final	All Open Access, Bronze	Scopus	2-s2.0-85025824171
28753467	The association of SCN1A p.Thr1067Ala polymorphism with epilepsy risk and the response to antiepileptic drugs in Slovenian children and adolescents with epilepsy	2017	Bertok S., Dolžan V., Goričar K., Podkrajšek K.T., Battelino T., Rener-Primec Z.	Seizure	51			9	13		5	10.1016/j.seizure.2017.07.007	https://www.scopus.com/inward/record.uri?eid=2-s2.0-85025696349&doi=10.1016%2fj.seizure.2017.07.007&partnerID=40&md5=fe4e54c6ad989f5f2ed31092547938aa		Article	Final	All Open Access, Bronze	Scopus	2-s2.0-85025696349
28784306	Nav1.2 is expressed in caudal ganglionic eminence-derived disinhibitory interneurons: Mutually exclusive distributions of Nav1.1 and Nav1.2	2017	Yamagata T., Ogiwara I., Mazaki E., Yanagawa Y., Yamakawa K.	Biochemical and Biophysical Research Communications	491	4		1070	1076		21	10.1016/j.bbrc.2017.08.013	https://www.scopus.com/inward/record.uri?eid=2-s2.0-85027236740&doi=10.1016%2fj.bbrc.2017.08.013&partnerID=40&md5=fc45cfa2692f36335e7ca1f5b2cacd50		Article	Final		Scopus	2-s2.0-85027236740
28711494	Development of membrane ion channels during neural differentiation from human embryonic stem cells	2017	Mirsadeghi S., Shahbazi E., Hemmesi K., Nemati S., Baharvand H., Mirnajafi-Zadeh J., Kiani S.	Biochemical and Biophysical Research Communications	491	1		166	172		10	10.1016/j.bbrc.2017.07.068	https://www.scopus.com/inward/record.uri?eid=2-s2.0-85024098372&doi=10.1016%2fj.bbrc.2017.07.068&partnerID=40&md5=1248e2f51271563a86c79ce634d47db0		Article	Final		Scopus	2-s2.0-85024098372
28794249	Not all SCN1A epileptic encephalopathies are Dravet syndrome	2017	Sadleir L.G., Mountier E.I., Gill D., Davis S., Joshi C., Devile C., Kurian M.A., Mandelstam S., Wirrell E., Nickels K.C., Murali H.R., Carvill G., Myers C.T., Mefford H.C., Scheffer I.E.	Neurology	89	10		1035	1042		42	10.1212/WNL.0000000000004331	https://www.scopus.com/inward/record.uri?eid=2-s2.0-85028821137&doi=10.1212%2fWNL.0000000000004331&partnerID=40&md5=48ff1e7177fe358fc318cab2c05603cb		Article	Final	All Open Access, Hybrid Gold, Green	Scopus	2-s2.0-85028821137
28735770	To4, the first Tityus obscurus β-toxin fully electrophysiologically characterized on human sodium channel isoforms	2017	Duque H.M., Mourão C.B.F., Tibery D.V., Barbosa E.A., Campos L.A., Schwartz E.F.	Peptides	95			106	115		5	10.1016/j.peptides.2017.07.010	https://www.scopus.com/inward/record.uri?eid=2-s2.0-85026829403&doi=10.1016%2fj.peptides.2017.07.010&partnerID=40&md5=5c4fbc946066e49fe360d6f8c13a33c6		Article	Final		Scopus	2-s2.0-85026829403
28732259	Dravet syndrome: Characteristics, comorbidities, and caregiver concerns	2017	Villas N., Meskis M.A., Goodliffe S.	Epilepsy and Behavior	74			81	86		67	10.1016/j.yebeh.2017.06.031	https://www.scopus.com/inward/record.uri?eid=2-s2.0-85024371064&doi=10.1016%2fj.yebeh.2017.06.031&partnerID=40&md5=961aa45ba2037f7f42712c5dc82d3515		Article	Final	All Open Access, Hybrid Gold	Scopus	2-s2.0-85024371064
28683344	Age-related “Sleep/nocturnal” tonic and tonic clonic seizure clusters are underdiagnosed in patients with Dravet Syndrome	2017	Losito E., Kuchenbuch M., Chemaly N., Laschet J., Chiron C., Kaminska A., Nabbout R.	Epilepsy and Behavior	74			33	40		9	10.1016/j.yebeh.2017.05.037	https://www.scopus.com/inward/record.uri?eid=2-s2.0-85021637151&doi=10.1016%2fj.yebeh.2017.05.037&partnerID=40&md5=8e4b0911e80f30f7432e5fe5f11ce8d9		Article	Final		Scopus	2-s2.0-85021637151
28621020	Conservation of alternative splicing in sodium channels reveals evolutionary focus on release from inactivation and structural insights into gating	2017	Liavas A., Lignani G., Schorge S.	Journal of Physiology	595	16		5671	5685		5	10.1113/JP274693	https://www.scopus.com/inward/record.uri?eid=2-s2.0-85024384520&doi=10.1113%2fJP274693&partnerID=40&md5=945d85bb4a61dd68507ee6e534fb63d6		Article	Final	All Open Access, Hybrid Gold, Green	Scopus	2-s2.0-85024384520
28635024	A small molecule activator of Nav1.1 channels increases fast-spiking interneuron excitability and GABAergic transmission in vitro and has anti-convulsive effects in vivo	2017	Frederiksen K., Lu D., Yang J., Jensen H.S., Bastlund J.F., Larsen P.H., Liu H., Crestey F., Dekermendjian K., Badolo L., Laursen M., Hougaard C., Yang C., Svenstrup N., Grunnet M.	European Journal of Neuroscience	46	3		1887	1896		14	10.1111/ejn.13626	https://www.scopus.com/inward/record.uri?eid=2-s2.0-85026829494&doi=10.1111%2fejn.13626&partnerID=40&md5=87524ebd900f7bdeca4071d4a4ac9ea7		Article	Final		Scopus	2-s2.0-85026829494
28666193	Efficacy of adjunctive vagus nerve stimulation in patients with Dravet syndrome: A meta-analysis of 68 patients	2017	Dibué-Adjei M., Fischer I., Steiger H.-J., Kamp M.A.	Seizure	50			147	152		20	10.1016/j.seizure.2017.06.007	https://www.scopus.com/inward/record.uri?eid=2-s2.0-85021317096&doi=10.1016%2fj.seizure.2017.06.007&partnerID=40&md5=ec38b8016a8583e8a28fd15dcac0ef71		Review	Final	All Open Access, Bronze	Scopus	2-s2.0-85021317096
28544625	A mutation in GABRB3 associated with Dravet syndrome	2017	Le S.V., Le P.H.T., Le T.K.V., Kieu Huynh T.T., Hang Do T.T.	American Journal of Medical Genetics, Part A	173	8		2126	2131		13	10.1002/ajmg.a.38282	https://www.scopus.com/inward/record.uri?eid=2-s2.0-85019912068&doi=10.1002%2fajmg.a.38282&partnerID=40&md5=2cc365ebfa4dbb776ff6fc104d58ee77		Article	Final		Scopus	2-s2.0-85019912068
28556246	Cacna1g is a genetic modifier of epilepsy in a mouse model of Dravet syndrome	2017	Calhoun J.D., Hawkins N.A., Zachwieja N.J., Kearney J.A.	Epilepsia	58	8		e111	e115		24	10.1111/epi.13811	https://www.scopus.com/inward/record.uri?eid=2-s2.0-85019715116&doi=10.1111%2fepi.13811&partnerID=40&md5=ee58e79d85070c7544db20b984c8dfb5		Article	Final	All Open Access, Green	Scopus	2-s2.0-85019715116
28488083	Ion Channel Genes and Epilepsy: Functional Alteration, Pathogenic Potential, and Mechanism of Epilepsy	2017	Wei F., Yan L.-M., Su T., He N., Lin Z.-J., Wang J., Shi Y.-W., Yi Y.-H., Liao W.-P.	Neuroscience Bulletin	33	4		455	477		47	10.1007/s12264-017-0134-1	https://www.scopus.com/inward/record.uri?eid=2-s2.0-85019143964&doi=10.1007%2fs12264-017-0134-1&partnerID=40&md5=fcac424b352f3d344e379b76982335c9		Review	Final	All Open Access, Green	Scopus	2-s2.0-85019143964
28505490	Heat induced temperature dysregulation and seizures in Dravet Syndrome/GEFS+ Gabrg2+/Q390X mice	2017	Warner T.A., Liu Z., Macdonald R.L., Kang J.-Q.	Epilepsy Research	134			1	8		9	10.1016/j.eplepsyres.2017.04.020	https://www.scopus.com/inward/record.uri?eid=2-s2.0-85019079560&doi=10.1016%2fj.eplepsyres.2017.04.020&partnerID=40&md5=6bd0d74f32a92754c0171e93f8c9e3c2		Article	Final	All Open Access, Green	Scopus	2-s2.0-85019079560
	Genetic basis of sudden unexpected death in epilepsy	2017	Bagnall R.D., Crompton D.E., Semsarian C.	Frontiers in Neurology	8	JUL	348				32	10.3389/fneur.2017.00348	https://www.scopus.com/inward/record.uri?eid=2-s2.0-85025819437&doi=10.3389%2ffneur.2017.00348&partnerID=40&md5=e19c87687f770133b87edfd61f1e65cf		Review	Final	All Open Access, Gold, Green	Scopus	2-s2.0-85025819437
	Genetic and epigenetic mechanisms of epilepsy: A review	2017	Chen T., Giri M., Xia Z., Subedi Y.N., Li Y.	Neuropsychiatric Disease and Treatment	13			1841	1859		37	10.2147/NDT.S142032	https://www.scopus.com/inward/record.uri?eid=2-s2.0-85025826063&doi=10.2147%2fNDT.S142032&partnerID=40&md5=da6783bf92268a2b7ce2e169fb462e7f		Review	Final	All Open Access, Gold, Green	Scopus	2-s2.0-85025826063
28566552	Advancing the phenome alongside the genome in epilepsy studies	2017	Helbig I., Lindhout D.	Neurology	89	1		14	15		4	10.1212/WNL.0000000000004053	https://www.scopus.com/inward/record.uri?eid=2-s2.0-85021866946&doi=10.1212%2fWNL.0000000000004053&partnerID=40&md5=55c8ed98b8ad0c02fb042b0e35f823ab		Editorial	Final		Scopus	2-s2.0-85021866946
	Evaluation of DNA damage and mutation screening of exon 26 of SCN1A gene in patients with epilepsy	2017	Sekar N., Ramgir S., D Prabhu Y., Renu K., V.G A.	International Journal of Epilepsy	4	2		125	131			10.1016/j.ijep.2017.11.001	https://www.scopus.com/inward/record.uri?eid=2-s2.0-85034433792&doi=10.1016%2fj.ijep.2017.11.001&partnerID=40&md5=5ff2cf86a4cae3993bbb39ccee2e79a8		Article	Final	All Open Access, Hybrid Gold	Scopus	2-s2.0-85034433792
28812061	Behavioral comorbidities and drug treatments in a zebrafish scn1lab model of dravet syndrome	2017	Grone B.P., Qu T., Baraban S.C.	eNeuro	4	4	e0066-17.2017				17	10.1523/ENEURO.0066-17.2017	https://www.scopus.com/inward/record.uri?eid=2-s2.0-85032156641&doi=10.1523%2fENEURO.0066-17.2017&partnerID=40&md5=47a5abb16d4c58e01bb1485ef7199107		Article	Final	All Open Access, Gold, Green	Scopus	2-s2.0-85032156641
28686619	Rare variants of small effect size in neuronal excitability genes influence clinical outcome in Japanese cases of SCN1A truncation-positive Dravet syndrome	2017	Hammer M.F., Ishii A., Johnstone L., Tchourbanov A., Lau B., Sprissler R., Hallmark B., Zhang M., Zhou J., Watkins J., Hirose S.	PLoS ONE	12	7	e0180485				12	10.1371/journal.pone.0180485	https://www.scopus.com/inward/record.uri?eid=2-s2.0-85022330222&doi=10.1371%2fjournal.pone.0180485&partnerID=40&md5=df1108278d98dc76059792115849e86d		Article	Final	All Open Access, Gold, Green	Scopus	2-s2.0-85022330222
27226003	Recurrent coma and fever in familial hemiplegic migraine type 2. A prospective 15-year follow-up of a large family with a novel ATP1A2 mutation	2017	Pelzer N., Blom D.E., Stam A.H., Vijfhuizen L.S., Hageman A.T.M., Van Vliet J.A., Ferrari M.D., Van Den Maagdenberg A.M.J.M., Haan J., Terwindt G.M.	Cephalalgia	37	8		737	755		17	10.1177/0333102416651284	https://www.scopus.com/inward/record.uri?eid=2-s2.0-85021994383&doi=10.1177%2f0333102416651284&partnerID=40&md5=6b2e0f3dd489b24fb2e3f64ab57ef9cd		Article	Final		Scopus	2-s2.0-85021994383
28683073	High-throughput electrophysiological assays for voltage gated ion channels using SyncroPatch 768PE	2017	Li T., Lu G., Chiang E.Y., Chernov-Rogan T., Grogan J.L., Chen J.	PLoS ONE	12	7	e0180154				24	10.1371/journal.pone.0180154	https://www.scopus.com/inward/record.uri?eid=2-s2.0-85021855643&doi=10.1371%2fjournal.pone.0180154&partnerID=40&md5=0797ff1e0b21e782e8827e4a8eec9ad8		Article	Final	All Open Access, Gold, Green	Scopus	2-s2.0-85021855643
28518218	Comparison and optimization of in silico algorithms for predicting the pathogenicity of sodium channel variants in epilepsy	2017	Holland K.D., Bouley T.M., Horn P.S.	Epilepsia	58	7		1190	1198		8	10.1111/epi.13798	https://www.scopus.com/inward/record.uri?eid=2-s2.0-85021810254&doi=10.1111%2fepi.13798&partnerID=40&md5=d90bcd1dd5d905e53e6156f7e027c49f		Article	Final	All Open Access, Bronze, Green	Scopus	2-s2.0-85021810254
28373025	Early-life febrile seizures worsen adult phenotypes in Scn1a mutants	2017	Dutton S.B.B., Dutt K., Papale L.A., Helmers S., Goldin A.L., Escayg A.	Experimental Neurology	293			159	171		20	10.1016/j.expneurol.2017.03.026	https://www.scopus.com/inward/record.uri?eid=2-s2.0-85018465372&doi=10.1016%2fj.expneurol.2017.03.026&partnerID=40&md5=f9c586a35227aeb858a3a7252cbc5a00		Article	Final	All Open Access, Green	Scopus	2-s2.0-85018465372
28607094	Pharmacology of the Nav1.1 domain IV voltage sensor reveals coupling between inactivation gating processes	2017	Osteen J.D., Sampson K., Iyer V., Julius D., Bosmans F.	Proceedings of the National Academy of Sciences of the United States of America	114	26		6836	6841		12	10.1073/pnas.1621263114	https://www.scopus.com/inward/record.uri?eid=2-s2.0-85021418073&doi=10.1073%2fpnas.1621263114&partnerID=40&md5=55139a586c50864f71ca962098e28de8		Article	Final	All Open Access, Bronze, Green	Scopus	2-s2.0-85021418073
28690234	PCDH19 gene mutations lead to epilepsy with mental retardation limited to females in 2 cases and literature review	2017	Yang L., Arafat A., Peng J., Chen C., Ma Y., Yin F.	Journal of Central South University (Medical Sciences)	42	6		730	736			10.11817/j.issn.l672-7347.2017.06.021	https://www.scopus.com/inward/record.uri?eid=2-s2.0-85026669335&doi=10.11817%2fj.issn.l672-7347.2017.06.021&partnerID=40&md5=b8583490e2be22c291ed83fb7677698a		Article	Final		Scopus	2-s2.0-85026669335
28511630	Corpus Callosotomy for Intractable Epilepsy Revisited: The Children's Hospital of Michigan Series	2017	Luat A.F., Asano E., Kumar A., Chugani H.T., Sood S.	Journal of Child Neurology	32	7		624	629		14	10.1177/0883073817697847	https://www.scopus.com/inward/record.uri?eid=2-s2.0-85019720151&doi=10.1177%2f0883073817697847&partnerID=40&md5=e3ee8dc7fff110f3ddf5ad2b9c253df6		Article	Final	All Open Access, Green	Scopus	2-s2.0-85019720151
	Testing Genes Implicated in the Novel Case of Familial Hemiplegic Migraine	2017	Khaiboullina S.F., Mendelevich E.G., Martynova E.V., Davidyuk Y.N., Giniatullin R.A., Rizvanov A.A.	BioNanoScience	7	2		265	268		1	10.1007/s12668-016-0314-x	https://www.scopus.com/inward/record.uri?eid=2-s2.0-85019073146&doi=10.1007%2fs12668-016-0314-x&partnerID=40&md5=76201011639b4de6b0fa6ea31da78444		Article	Final		Scopus	2-s2.0-85019073146
28433711	MDH2 is an RNA binding protein involved in downregulation of sodium channel Scn1a expression under seizure condition	2017	Chen Y.-H., Liu S.-J., Gao M.-M., Zeng T., Lin G.-W., Tan N.-N., Tang H.-L., Lu P., Su T., Sun W.-W., Xie L.-C., Yi Y.-H., Long Y.-S.	Biochimica et Biophysica Acta - Molecular Basis of Disease	1863	6		1492	1499		5	10.1016/j.bbadis.2017.04.018	https://www.scopus.com/inward/record.uri?eid=2-s2.0-85018447794&doi=10.1016%2fj.bbadis.2017.04.018&partnerID=40&md5=d94f4028dcb030c0ab4a59daa38a3348		Article	Final	All Open Access, Bronze	Scopus	2-s2.0-85018447794
28235671	SCN3A deficiency associated with increased seizure susceptibility	2017	Lamar T., Vanoye C.G., Calhoun J., Wong J.C., Dutton S.B.B., Jorge B.S., Velinov M., Escayg A., Kearney J.A.	Neurobiology of Disease	102			38	48		26	10.1016/j.nbd.2017.02.006	https://www.scopus.com/inward/record.uri?eid=2-s2.0-85014304466&doi=10.1016%2fj.nbd.2017.02.006&partnerID=40&md5=3ee5f1e317a4393fcff94367caa4770d		Article	Final	All Open Access, Green	Scopus	2-s2.0-85014304466
28262406	A novel inherited SCN1A mutation associated with GEFS+ in benign and encephalopathic epilepsy	2017	Gauthier A.C., Manganas L.N., Mattson R.H.	Journal of Clinical Neuroscience	40			82	84		1	10.1016/j.jocn.2017.02.011	https://www.scopus.com/inward/record.uri?eid=2-s2.0-85014098375&doi=10.1016%2fj.jocn.2017.02.011&partnerID=40&md5=26a39116c21e2084fb3dc449fc50f112		Article	Final		Scopus	2-s2.0-85014098375
28150151	Structure-based assessment of disease-related mutations in human voltage-gated sodium channels	2017	Huang W., Liu M., Yan S.F., Yan N.	Protein and Cell	8	6		401	438		68	10.1007/s13238-017-0372-z	https://www.scopus.com/inward/record.uri?eid=2-s2.0-85011294805&doi=10.1007%2fs13238-017-0372-z&partnerID=40&md5=65e6a76168cc398387e18f37c04a2752		Review	Final	All Open Access, Gold, Green	Scopus	2-s2.0-85011294805
28538129	Cannabinoids for Epilepsy - Real Data, at Last	2017	Berkovic S.F.	New England Journal of Medicine	376	21		2075	2076		8	10.1056/NEJMe1702205	https://www.scopus.com/inward/record.uri?eid=2-s2.0-85019828908&doi=10.1056%2fNEJMe1702205&partnerID=40&md5=aa1f0ae627323f1773bddb28f29af441		Editorial	Final		Scopus	2-s2.0-85019828908
	Determination of SCN1A genetic variants in Mexican patients with refractory epilepsy and Dravet syndrome	2017	Jiménez-Arredondo R.E., Brambila-Tapia A.J.L., Mercado-Silva F.M., Magaña-Torres M.T., Figuera L.E.	Genetics and Molecular Research	16	2	gmr16029405					10.4238/gmr16029405	https://www.scopus.com/inward/record.uri?eid=2-s2.0-85019994036&doi=10.4238%2fgmr16029405&partnerID=40&md5=c60ebe0fa6c101bc074236b0c9f0c128		Article	Final	All Open Access, Bronze, Green	Scopus	2-s2.0-85019994036
	Genetic basis of pediatric epilepsy syndromes	2017	Zhang D., Liu X., Deng X.	Experimental and Therapeutic Medicine	13	5		2129	2133		10	10.3892/etm.2017.4267	https://www.scopus.com/inward/record.uri?eid=2-s2.0-85032821460&doi=10.3892%2fetm.2017.4267&partnerID=40&md5=22d29c6e072ff6bfb551872e78d0a860		Review	Final	All Open Access, Bronze, Green	Scopus	2-s2.0-85032821460
28527083	Shared mechanisms of epilepsy, migraine and affective disorders	2017	Zarcone D., Corbetta S.	Neurological Sciences	38			73	76		39	10.1007/s10072-017-2902-0	https://www.scopus.com/inward/record.uri?eid=2-s2.0-85019574909&doi=10.1007%2fs10072-017-2902-0&partnerID=40&md5=57050168557348ea2479851a80a8a679		Article	Final		Scopus	2-s2.0-85019574909
28405954	Genetic Testing in Pediatric Epilepsy	2017	Sands T.T., Choi H.	Current Neurology and Neuroscience Reports	17	5	45				18	10.1007/s11910-017-0753-y	https://www.scopus.com/inward/record.uri?eid=2-s2.0-85017565681&doi=10.1007%2fs11910-017-0753-y&partnerID=40&md5=70a336b6a585ac1d374d2357be035697		Review	Final		Scopus	2-s2.0-85017565681
28233668	Myoclonic Absence Seizures in Dravet Syndrome	2017	Myers K.A., Scheffer I.E.	Pediatric Neurology	70			67	69		4	10.1016/j.pediatrneurol.2017.01.004	https://www.scopus.com/inward/record.uri?eid=2-s2.0-85013426698&doi=10.1016%2fj.pediatrneurol.2017.01.004&partnerID=40&md5=ef8a6152d685cf7edc25a98288b2e9d1		Article	Final		Scopus	2-s2.0-85013426698
28007400	Consequences of acute Nav1.1 exposure to deltamethrin	2017	James T.F., Nenov M.N., Tapia C.M., Lecchi M., Koshy S., Green T.A., Laezza F.	NeuroToxicology	60			150	160		8	10.1016/j.neuro.2016.12.005	https://www.scopus.com/inward/record.uri?eid=2-s2.0-85009250107&doi=10.1016%2fj.neuro.2016.12.005&partnerID=40&md5=6ab19cf1a9315099d855bb47dfc2f568		Article	Final	All Open Access, Green	Scopus	2-s2.0-85009250107
26969601	A Point Mutation in SCN1A 5′ Genomic Region Decreases the Promoter Activity and Is Associated with Mild Epilepsy and Seizure Aggravation Induced by Antiepileptic Drug	2017	Gao Q.-W., Hua L.-D., Wang J., Fan C.-X., Deng W.-Y., Li B., Bian W.-J., Shao C.-X., He N., Zhou P., Liao W.-P., Shi Y.-W.	Molecular Neurobiology	54	4		2428	2434		6	10.1007/s12035-016-9800-y	https://www.scopus.com/inward/record.uri?eid=2-s2.0-84960425832&doi=10.1007%2fs12035-016-9800-y&partnerID=40&md5=b599d426b5f035d57f910e806ae2d4a6		Article	Final		Scopus	2-s2.0-84960425832
28356460	Impaired intracortical inhibition demonstrated in vivo in people with Dravet syndrome	2017	Stern W.M., Sander J.W., Rothwell J.C., Sisodiya S.M.	Neurology	88	17		1659	1665		21	10.1212/WNL.0000000000003868	https://www.scopus.com/inward/record.uri?eid=2-s2.0-85019784413&doi=10.1212%2fWNL.0000000000003868&partnerID=40&md5=8ff8defbdaacc7db9dbccb4df6fe4bdc		Article	Final	All Open Access, Hybrid Gold, Green	Scopus	2-s2.0-85019784413
	The genetic relationship between epilepsy and hemiplegic migraine	2017	Huang Y., Xiao H., Qin X., Nong Y., Zou D., Wu Y.	Neuropsychiatric Disease and Treatment	13			1175	1179		8	10.2147/NDT.S132451	https://www.scopus.com/inward/record.uri?eid=2-s2.0-85019234915&doi=10.2147%2fNDT.S132451&partnerID=40&md5=634bf1a8db5029e24637ea87a7f82bb1		Review	Final	All Open Access, Gold, Green	Scopus	2-s2.0-85019234915
	Mutation screening of SCN1A 3' untranslated region on Dravet syndrome patients and functional analysis of the variant	2017	Zeng T., Xiao X., Min F., Chen S., Li Z., Pan X., Zhou J., Long Y., Liao W.	Chinese Journal of Neurology	50	4		261	265			10.3760/cma.j.issn.1006-7876.2017.04.006	https://www.scopus.com/inward/record.uri?eid=2-s2.0-85028051852&doi=10.3760%2fcma.j.issn.1006-7876.2017.04.006&partnerID=40&md5=86b6f64ead620dd774a5418f3178b143		Article	Final		Scopus	2-s2.0-85028051852
28387369	Unexplained Early Infantile Epileptic Encephalopathy in Han Chinese Children: Next-Generation Sequencing and Phenotype Enriching	2017	Arafat A., Jing P., Ma Y., Pu M., Nan G., Fang H., Chen C., Fei Y.	Scientific Reports	7		46227				19	10.1038/srep46227	https://www.scopus.com/inward/record.uri?eid=2-s2.0-85017138898&doi=10.1038%2fsrep46227&partnerID=40&md5=10faf68f7e71b33a02dcc3d016f6c155		Article	Final	All Open Access, Gold, Green	Scopus	2-s2.0-85017138898
	Pharmacological analysis of the anti-epileptic mechanisms of fenfluramine in scn1a mutant zebrafish	2017	Sourbron J., Smolders I., de Witte P., Lagae L.	Frontiers in Pharmacology	8	APR	191				59	10.3389/fphar.2017.00191	https://www.scopus.com/inward/record.uri?eid=2-s2.0-85018742308&doi=10.3389%2ffphar.2017.00191&partnerID=40&md5=fc10b20fda78b3dc5e0b9e2bbca8a8cb		Article	Final	All Open Access, Gold, Green	Scopus	2-s2.0-85018742308
28328123	Lawsuit raises questions about variant interpretation and communication: Ambiguity of lab and clinician roles could be at issue if case proceeds	2017	[无可用作者姓名]	American journal of medical genetics. Part A	173	4		838	839		3	10.1002/ajmg.a.38223	https://www.scopus.com/inward/record.uri?eid=2-s2.0-85038129707&doi=10.1002%2fajmg.a.38223&partnerID=40&md5=4b3c3e9cf440d54259fb62407d0686d6		Article	Final		Scopus	2-s2.0-85038129707
	Molecular genetics of epilepsy: A clinician's perspective	2017	Dhiman V.	Annals of Indian Academy of Neurology	20	2		96	102		3	10.4103/aian.AIAN_447_16	https://www.scopus.com/inward/record.uri?eid=2-s2.0-85019150930&doi=10.4103%2faian.AIAN_447_16&partnerID=40&md5=ed75091d4f26b08c7a9c3fe656add1a4		Review	Final	All Open Access, Gold, Green	Scopus	2-s2.0-85019150930
28330972	Fatal cerebral edema with status epilepticus in children with dravet syndrome: Report of 5 cases	2017	Myers K.A., McMahon J.M., Mandelstam S.A., Mackay M.T., Kalnins R.M., Leventer R.J., Scheffer I.E.	Pediatrics	139	4	e20161933				18	10.1542/peds.2016-1933	https://www.scopus.com/inward/record.uri?eid=2-s2.0-85018966237&doi=10.1542%2fpeds.2016-1933&partnerID=40&md5=891b1b3561161ba70d0d05084dd8993d		Article	Final	All Open Access, Bronze	Scopus	2-s2.0-85018966237
28079431	Vagus nerve stimulation in intractable epilepsy associated with SCN1A gene abnormalities	2017	Fulton S.P., Van Poppel K., McGregor A.L., Mudigoudar B., Wheless J.W.	Journal of Child Neurology	32	5		494	498		14	10.1177/0883073816687221	https://www.scopus.com/inward/record.uri?eid=2-s2.0-85018159304&doi=10.1177%2f0883073816687221&partnerID=40&md5=95b312dfe2eb66ec0c8fb08456266c88		Article	Final		Scopus	2-s2.0-85018159304
28271496	Genetics of Migraine: Insights into the Molecular Basis of Migraine Disorders	2017	Sutherland H.G., Griffiths L.R.	Headache	57	4		537	569		52	10.1111/head.13053	https://www.scopus.com/inward/record.uri?eid=2-s2.0-85014602132&doi=10.1111%2fhead.13053&partnerID=40&md5=d0c2bbe775b7058fb2440534c59037eb		Review	Final	All Open Access, Green	Scopus	2-s2.0-85014602132
27889818	Somatosensory reflex seizures in a child with epilepsy related to novel SCN1A mutation	2017	Arican P., Dundar N.O., Cavusoglu D., Ozdemır T.R., Gencpinar P.	Child's Nervous System	33	4		677	680		2	10.1007/s00381-016-3297-6	https://www.scopus.com/inward/record.uri?eid=2-s2.0-84997170442&doi=10.1007%2fs00381-016-3297-6&partnerID=40&md5=cee23517aba435330530c8dd887d75ff		Article	Final		Scopus	2-s2.0-84997170442
28202706	Clinical and genetic factors predicting Dravet syndrome in infants with SCN1A mutations	2017	Cetica V., Chiari S., Mei D., Parrini E., Grisotto L., Marini C., Pucatti D., Ferrari A., Sicca F., Specchio N., Trivisano M., Battaglia D., Contaldo I., Zamponi N., Petrelli C., Granata T., Ragona F., Avanzini G., Guerrini R.	Neurology	88	11		1037	1044		44	10.1212/WNL.0000000000003716	https://www.scopus.com/inward/record.uri?eid=2-s2.0-85015176537&doi=10.1212%2fWNL.0000000000003716&partnerID=40&md5=23b2f5fe4b4a462961acee3f05f848cc		Article	Final	All Open Access, Green	Scopus	2-s2.0-85015176537
	Management of Dravet syndrome and emerging therapy options	2017	Prager C., Cross J.H.	Expert Opinion on Orphan Drugs	5	3		219	227			10.1080/21678707.2017.1281124	https://www.scopus.com/inward/record.uri?eid=2-s2.0-85013290408&doi=10.1080%2f21678707.2017.1281124&partnerID=40&md5=ca86fb0a9ad093df475f1e8289ffe6b0		Review	Final	All Open Access, Green	Scopus	2-s2.0-85013290408
28073790	Clemizole and modulators of serotonin signalling suppress seizures in Dravet syndrome	2017	Griffin A., Hamling K.R., Knupp K., Hong S., Lee L.P., Baraban S.C.	Brain	140	3		669	683		97	10.1093/brain/aww342	https://www.scopus.com/inward/record.uri?eid=2-s2.0-85021847915&doi=10.1093%2fbrain%2faww342&partnerID=40&md5=b655613bcd07bc80782aeb5fd5d36894		Article	Final	All Open Access, Green	Scopus	2-s2.0-85021847915
28442529	Coinheritance of novel mutations in SCN1A causing gefs+ and in KDM6A causing kabuki syndrome in a family	2017	Kim J., Lee C.G.	Annals of Clinical and Laboratory Science	47	2		229	235		5		https://www.scopus.com/inward/record.uri?eid=2-s2.0-85018402985&partnerID=40&md5=02ab9bd05388f8981ae8fdd6e80ae8ee		Article	Final		Scopus	2-s2.0-85018402985
28192756	SCN1A clinical spectrum includes the self-limited focal epilepsies of childhood	2017	Kivity S., Oliver K.L., Afawi Z., Damiano J.A., Arsov T., Bahlo M., Berkovic S.F.	Epilepsy Research	131			9	14		6	10.1016/j.eplepsyres.2017.01.012	https://www.scopus.com/inward/record.uri?eid=2-s2.0-85012124628&doi=10.1016%2fj.eplepsyres.2017.01.012&partnerID=40&md5=b62a04657d4c99fa7d2c3ce5cb21a66f		Article	Final		Scopus	2-s2.0-85012124628
28199897	Real-world utility of whole exome sequencing with targeted gene analysis for focal epilepsy	2017	Perucca P., Scheffer I.E., Harvey A.S., James P.A., Lunke S., Thorne N., Gaff C., Regan B.M., Damiano J.A., Hildebrand M.S., Berkovic S.F., O'Brien T.J., Kwan P.	Epilepsy Research	131			1	8		51	10.1016/j.eplepsyres.2017.02.001	https://www.scopus.com/inward/record.uri?eid=2-s2.0-85012093044&doi=10.1016%2fj.eplepsyres.2017.02.001&partnerID=40&md5=fc87a9173d3f71f565a3e310ac3933d5		Article	Final		Scopus	2-s2.0-85012093044
28186331	Adult motor phenotype differentiates Dravet syndrome from Lennox-Gastaut syndrome and links SCN1A to early onset parkinsonian features	2017	Aljaafari D., Fasano A., Nascimento F.A., Lang A.E., Andrade D.M.	Epilepsia	58	3		e44	e48		16	10.1111/epi.13692	https://www.scopus.com/inward/record.uri?eid=2-s2.0-85012078095&doi=10.1111%2fepi.13692&partnerID=40&md5=dcbbd95e05dfa4638eb0bb305c707ff0		Article	Final	All Open Access, Bronze	Scopus	2-s2.0-85012078095
27734276	Targeted next generation sequencing: the diagnostic value in early-onset epileptic encephalopathy	2017	Gokben S., Onay H., Yilmaz S., Atik T., Serdaroglu G., Tekin H., Ozkinay F.	Acta Neurologica Belgica	117	1		131	138		20	10.1007/s13760-016-0709-z	https://www.scopus.com/inward/record.uri?eid=2-s2.0-84991105252&doi=10.1007%2fs13760-016-0709-z&partnerID=40&md5=919b551e691c3a604afcf111aa65e0a6		Article	Final		Scopus	2-s2.0-84991105252
28148630	Dysarthria and broader motor speech deficits in Dravet syndrome	2017	Turner S.J., Brown A., Arpone M., Anderson V., Morgan A.T., Scheffer I.E.	Neurology	88	8		743	749		14	10.1212/WNL.0000000000003635	https://www.scopus.com/inward/record.uri?eid=2-s2.0-85013484824&doi=10.1212%2fWNL.0000000000003635&partnerID=40&md5=c9cfefd0777b85d589281525c9b5312c		Article	Final	All Open Access, Green	Scopus	2-s2.0-85013484824
27777328	Focal Seizures in Patients with SCN1A Mutations: Response to Treatment	2017	McDonald C.L., Saneto R.P., Carmant L., Sotero De Menezes M.A.	Journal of Child Neurology	32	2		170	176		4	10.1177/0883073816672379	https://www.scopus.com/inward/record.uri?eid=2-s2.0-85011627912&doi=10.1177%2f0883073816672379&partnerID=40&md5=d9a4df8f2c13e28bb9d149491df0493a		Article	Final		Scopus	2-s2.0-85011627912
28084635	De novo SCN1A pathogenic variants in the GEFS+ spectrum: Not always a familial syndrome	2017	Myers K.A., Burgess R., Afawi Z., Damiano J.A., Berkovic S.F., Hildebrand M.S., Scheffer I.E.	Epilepsia	58	2		e26	e30		20	10.1111/epi.13649	https://www.scopus.com/inward/record.uri?eid=2-s2.0-85010520723&doi=10.1111%2fepi.13649&partnerID=40&md5=2e29fd9bee4b85e6d24a327d4f503a4f		Article	Final	All Open Access, Bronze	Scopus	2-s2.0-85010520723
28126647	Movement-activated cortical myoclonus in Dravet syndrome	2017	Canafoglia L., Ragona F., Panzica F., Piazza E., Freri E., Binelli S., Scaioli V., Avanzini G., Granata T., Franceschetti S.	Epilepsy Research	130			47	52		7	10.1016/j.eplepsyres.2017.01.007	https://www.scopus.com/inward/record.uri?eid=2-s2.0-85010377768&doi=10.1016%2fj.eplepsyres.2017.01.007&partnerID=40&md5=a15f026d718256defcc82b7891b99906		Article	Final		Scopus	2-s2.0-85010377768
	Association of SCN1A gene polymorphism with antiepileptic drug responsiveness in the population of Thrace, Greece	2017	Angelopoulou C., Veletza S., Heliopoulos I., Vadikolias K., Tripsianis G., Stathi C., Piperidou C.	Archives of Medical Science	13	1		138	147		8	10.5114/aoms.2016.59737	https://www.scopus.com/inward/record.uri?eid=2-s2.0-85007483222&doi=10.5114%2faoms.2016.59737&partnerID=40&md5=d143dc5f1cbb2fc8b29ef0530cb2ebe6		Article	Final	All Open Access, Gold, Green	Scopus	2-s2.0-85007483222
28042998	Photosensitivity in Dravet syndrome is under-recognized and related to prognosis	2017	Verbeek N., Kasteleijn-Nolst Trenité D., Wassenaar M., van Campen J., Sonsma A., Gunning W.B., de Weerd A., Knoers N., Spetgens W., Gutter T., Leijten F., Brilstra E.	Clinical Neurophysiology	128	2		323	330		9	10.1016/j.clinph.2016.11.021	https://www.scopus.com/inward/record.uri?eid=2-s2.0-85007420217&doi=10.1016%2fj.clinph.2016.11.021&partnerID=40&md5=ddf00e9891bfcd66b28aa99159627a8c		Article	Final		Scopus	2-s2.0-85007420217
28012175	Clinical implications of SCN1A missense and truncation variants in a large Japanese cohort with Dravet syndrome	2017	Ishii A., Watkins J.C., Chen D., Hirose S., Hammer M.F.	Epilepsia	58	2		282	290		33	10.1111/epi.13639	https://www.scopus.com/inward/record.uri?eid=2-s2.0-85007364776&doi=10.1111%2fepi.13639&partnerID=40&md5=5e927104d873c599e5f405c862e1ebd8		Article	Final		Scopus	2-s2.0-85007364776
27864847	Diagnostic Targeted Resequencing in 349 Patients with Drug-Resistant Pediatric Epilepsies Identifies Causative Mutations in 30 Different Genes	2017	Parrini E., Marini C., Mei D., Galuppi A., Cellini E., Pucatti D., Chiti L., Rutigliano D., Bianchini C., Virdò S., De Vita D., Bigoni S., Barba C., Mari F., Montomoli M., Pisano T., Rosati A., Clinical Study Group, Guerrini R., Accorsi P., Ardissone A., Battaglia D., Bertani G., Borgarello G., Cesaroni E., Chiari S., Cordelli D.M., Doccini V., Donati I., Fontana E., Fusco C., Gentile M., Giordan…	Human Mutation	38	2		216	225		90	10.1002/humu.23149	https://www.scopus.com/inward/record.uri?eid=2-s2.0-85006372419&doi=10.1002%2fhumu.23149&partnerID=40&md5=f2b6a99b7c7126c1d3512d0b4d0ca737		Article	Final		Scopus	2-s2.0-85006372419
28102593	A case for cannabidiol in Wolf–Hirschhorn syndrome seizure management	2017	Ho K.S., Wassman E.R.	American Journal of Medical Genetics, Part A	173	2		324	326		3	10.1002/ajmg.a.37979	https://www.scopus.com/inward/record.uri?eid=2-s2.0-84998996740&doi=10.1002%2fajmg.a.37979&partnerID=40&md5=3c6c1faac85bf73dfb9a8104c8bd0d40		Article	Final	All Open Access, Hybrid Gold, Green	Scopus	2-s2.0-84998996740
27816501	GAPDH-mediated posttranscriptional regulations of sodium channel Scn1a and Scn3a genes under seizure and ketogenic diet conditions	2017	Lin G.-W., Lu P., Zeng T., Tang H.-L., Chen Y.-H., Liu S.-J., Gao M.-M., Zhao Q.-H., Yi Y.-H., Long Y.-S.	Neuropharmacology	113			480	489		9	10.1016/j.neuropharm.2016.11.002	https://www.scopus.com/inward/record.uri?eid=2-s2.0-84994148925&doi=10.1016%2fj.neuropharm.2016.11.002&partnerID=40&md5=fe2a310b3cfa23c903fc3f099bef516c		Article	Final		Scopus	2-s2.0-84994148925
28074849	Genetic Variants Identified from Epilepsy of Unknown Etiology in Chinese Children by Targeted Exome Sequencing	2017	Weng Y., Du X., Bin R., Yu S., Xia Z., Zheng G., Zhong J., Zhang Y., Jiang Y.-H., Wang Y.	Scientific Reports	7		40319				28	10.1038/srep40319	https://www.scopus.com/inward/record.uri?eid=2-s2.0-85009240219&doi=10.1038%2fsrep40319&partnerID=40&md5=127a176fa7ba0e2667b12cd9101509a1		Article	Final	All Open Access, Gold, Green	Scopus	2-s2.0-85009240219
29745119	Expanding spectrum of SCN1A-related phenotype with novel mutations	2017	Hız-Kurul S., Gürsoy S., Ayanoğlu M., Yiş U., Erçal D.	Turkish Journal of Pediatrics	59	5		570	575			10.24953/turkjped.2017.05.010	https://www.scopus.com/inward/record.uri?eid=2-s2.0-85046255189&doi=10.24953%2fturkjped.2017.05.010&partnerID=40&md5=b4394decfe37c9870a5a7a280852b54d		Article	Final	All Open Access, Bronze	Scopus	2-s2.0-85046255189
	ExACtly zero or once	2017	Bennett C.A., Petrovski S., Oliver K.L., Berkovic S.F.	Neurology: Genetics	3	4					22	10.1212/NXG.0000000000000163	https://www.scopus.com/inward/record.uri?eid=2-s2.0-85044841777&doi=10.1212%2fNXG.0000000000000163&partnerID=40&md5=c6bd85d7bac5832cd93913f3ed4b6827		Article	Final	All Open Access, Gold, Green	Scopus	2-s2.0-85044841777
28455388	PCDH19-related epilepsy: A rare but recognisable clinical syndrome in females	2017	Lyons S., Marnane M., Reavey E., Williams N., Costello D.	Practical Neurology	17	4		314	317		7	10.1136/practneurol-2016-001521	https://www.scopus.com/inward/record.uri?eid=2-s2.0-85024486652&doi=10.1136%2fpractneurol-2016-001521&partnerID=40&md5=4101bace37e9dc05a7473ab1c6dce3fd		Article	Final		Scopus	2-s2.0-85024486652
	Lack of meaningful genotype-phenotype association in SCN1A-related infantile-onset epileptic encephalopathies	2017	Wahab S.A.A., Yakob Y., Khoo T.-B., Terumalay S.D., Ganesan V., Teh C.-M., bin Yahaya N.A., Heng H.-S., Vaithialingam M., Wong S.-W.	Neurology Asia	22	2		99	111		1		https://www.scopus.com/inward/record.uri?eid=2-s2.0-85021822907&partnerID=40&md5=6426b3cd76dd942fa3477bb3161c254f		Article	Final		Scopus	2-s2.0-85021822907
28674986	Epileptic encephalopathies as neurodegenerative disorders	2017	Helbig I., von Deimling M., Marsh E.D.	Advances in Neurobiology	15			295	315		5	10.1007/978-3-319-57193-5_11	https://www.scopus.com/inward/record.uri?eid=2-s2.0-85021705656&doi=10.1007%2f978-3-319-57193-5_11&partnerID=40&md5=48a553eccd538895074d63df9a3f276d		Book Chapter	Final		Scopus	2-s2.0-85021705656
	Comparative study of joint bioinformatics analysis of underlying potential of 'neurimmiR', miR-212-3P/miR-132-3P, being involved in epilepsy and its emerging role in human cancer	2017	Xia L., Li D., Lin C., Ou S., Li X., Pan S.	Oncotarget	8	25		40668	40682		17	10.18632/oncotarget.16541	https://www.scopus.com/inward/record.uri?eid=2-s2.0-85020932801&doi=10.18632%2foncotarget.16541&partnerID=40&md5=65c3e55f866f48992658d09c08657ea4		Article	Final	All Open Access, Bronze, Green	Scopus	2-s2.0-85020932801
28664031	Large-scale structural alteration of brain in epileptic children with SCN1A mutation	2017	Lee Y.-J., Yum M.-S., Kim M.-J., Shim W.-H., Yoon H.M., Yoo I.H., Lee J., Lim B.C., Kim K.J., Ko T.-S.	NeuroImage: Clinical	15			594	600		10	10.1016/j.nicl.2017.06.002	https://www.scopus.com/inward/record.uri?eid=2-s2.0-85020928411&doi=10.1016%2fj.nicl.2017.06.002&partnerID=40&md5=63ecd00a1f571bed8c1f460137e2762f		Article	Final	All Open Access, Gold, Green	Scopus	2-s2.0-85020928411
	A case of Dravet syndrome complicated by human herpesvirus-6 infection-associated acute encephalopathy and choreoathetosis	2017	Nakamura Y., Matsumoto H., Zaha K.	No To Hattatsu	49	1		32	36		2		https://www.scopus.com/inward/record.uri?eid=2-s2.0-85018352506&partnerID=40&md5=57737dda34d01fba36f4011266e6b9fb		Article	Final		Scopus	2-s2.0-85018352506
	A case of West syndrome with a deletion at chromosome 2q24.3-q31.3	2017	Hattori Y., Kawawaki H., Horino A., Thuji H., Nukui M., Kuki I., Okazaki S., Tomiwa K.	No To Hattatsu	49	2		131	135				https://www.scopus.com/inward/record.uri?eid=2-s2.0-85018247178&partnerID=40&md5=25e5126947738ce89517ed8f80653b3d		Article	Final		Scopus	2-s2.0-85018247178
	SCN1A gene mutation and adaptive functioning in 18 Vietnamese children with dravet syndrome	2017	Do T.T.H., Vu D.M., Huynh T.T.K., Le T.K.V., Sohn E.-H., Le T.M.T., Ha H.H., Bui C.B.	Journal of Clinical Neurology (Korea)	13	1		62	70		5	10.3988/jcn.2017.13.1.62	https://www.scopus.com/inward/record.uri?eid=2-s2.0-85009808606&doi=10.3988%2fjcn.2017.13.1.62&partnerID=40&md5=855e5f84357be27b916845d17901e579		Article	Final	All Open Access, Green	Scopus	2-s2.0-85009808606
	Vagus nerve stimulation for genetic epilepsy with febrile seizures plus (GEFS+) accompanying seizures with impaired consciousness	2017	Hanaya R., Kashida Y., Hosoyama H., Arita K., Niantiarno F.H., Maruyama S., Otsubo T., Tanaka K., Ishii A., Hirose S.	Epilepsy and Behavior Case Reports	7			16	19		5	10.1016/j.ebcr.2016.11.001	https://www.scopus.com/inward/record.uri?eid=2-s2.0-85007421358&doi=10.1016%2fj.ebcr.2016.11.001&partnerID=40&md5=4f462c8c31a06e3bbe9593f641824643		Article	Final	All Open Access, Gold, Green	Scopus	2-s2.0-85007421358
27527380	The clinical spectrum of female epilepsy patients with PCDH19 mutations in a Chinese population	2017	Liu A., Xu X., Yang X., Jiang Y., Yang Z., Liu X., Wu Y., Wu X., Wei L., Zhang Y.	Clinical Genetics	91	1		54	62		18	10.1111/cge.12846	https://www.scopus.com/inward/record.uri?eid=2-s2.0-85006757991&doi=10.1111%2fcge.12846&partnerID=40&md5=289400af39b7c73e755d2ab75b46e9a2		Article	Final	All Open Access, Hybrid Gold	Scopus	2-s2.0-85006757991
27817982	From genotype to phenotype in Dravet disease	2017	Gataullina S., Dulac O.	Seizure	44			58	64		67	10.1016/j.seizure.2016.10.014	https://www.scopus.com/inward/record.uri?eid=2-s2.0-85005765024&doi=10.1016%2fj.seizure.2016.10.014&partnerID=40&md5=941e417fe4e4038c227ebdaa4da7153d		Review	Final	All Open Access, Bronze	Scopus	2-s2.0-85005765024
27544716	Two mild cases of Dravet syndrome with truncating mutation of SCN1A	2017	Takaori T., Kumakura A., Ishii A., Hirose S., Hata D.	Brain and Development	39	1		72	74		4	10.1016/j.braindev.2016.07.006	https://www.scopus.com/inward/record.uri?eid=2-s2.0-84995892181&doi=10.1016%2fj.braindev.2016.07.006&partnerID=40&md5=04f483aa2b77fc20a7bc0ac322578237		Article	Final		Scopus	2-s2.0-84995892181
27523882	A case of Dravet syndrome with cortical myoclonus indicated by jerk-locked back-averaging of electroencephalogram data	2017	Kobayashi Y., Hanaoka Y., Akiayma T., Ohmori I., Ouchida M., Yamamoto T., Oka M., Yoshinaga H., Kobayashi K.	Brain and Development	39	1		75	79		3	10.1016/j.braindev.2016.07.005	https://www.scopus.com/inward/record.uri?eid=2-s2.0-84981736085&doi=10.1016%2fj.braindev.2016.07.005&partnerID=40&md5=3ed900b60341156292b1ca726de141bc		Article	Final		Scopus	2-s2.0-84981736085
27231140	Audit of use of stiripentol in adults with Dravet syndrome	2017	Balestrini S., Sisodiya S.M.	Acta Neurologica Scandinavica	135	1		73	79		20	10.1111/ane.12611	https://www.scopus.com/inward/record.uri?eid=2-s2.0-84971278525&doi=10.1111%2fane.12611&partnerID=40&md5=729ee1237e6b859f7f927474ecc63a7b		Article	Final	All Open Access, Hybrid Gold, Green	Scopus	2-s2.0-84971278525
27955713	Rare and common epilepsies converge on a shared gene regulatory network providing opportunities for novel antiepileptic drug discovery	2016	Delahaye-Duriez A., Srivastava P., Shkura K., Langley S.R., Laaniste L., Moreno-Moral A., Danis B., Mazzuferi M., Foerch P., Gazina E.V., Richards K., Petrou S., Kaminski R.M., Petretto E., Johnson M.R.	Genome Biology	17	1	245				43	10.1186/s13059-016-1097-7	https://www.scopus.com/inward/record.uri?eid=2-s2.0-85003698352&doi=10.1186%2fs13059-016-1097-7&partnerID=40&md5=3dd9dd4616f6fc709d87b629b7660009		Article	Final	All Open Access, Gold, Green	Scopus	2-s2.0-85003698352
27690330	Mapping of a FEB3 homologous febrile seizure locus on mouse chromosome 2 containing candidate genes Scn1a and Scn3a	2016	Hessel E.V.S., van Lith H.A., Wolterink-Donselaar I.G., de Wit M., Groot Koerkamp M.J.A., Holstege F.C.P., Kas M.J.H., Fernandes C., de Graan P.N.E.	European Journal of Neuroscience	44	11		2950	2957		2	10.1111/ejn.13420	https://www.scopus.com/inward/record.uri?eid=2-s2.0-85000644805&doi=10.1111%2fejn.13420&partnerID=40&md5=3383d4eba6b6724faf42b98ea3856a78		Article	Final	All Open Access, Green	Scopus	2-s2.0-85000644805
27810515	Mortality in Dravet syndrome	2016	Cooper M.S., Mcintosh A., Crompton D.E., McMahon J.M., Schneider A., Farrell K., Ganesan V., Gill D., Kivity S., Lerman-Sagie T., McLellan A., Pelekanos J., Ramesh V., Sadleir L., Wirrell E., Scheffer I.E.	Epilepsy Research	128			43	47		112	10.1016/j.eplepsyres.2016.10.006	https://www.scopus.com/inward/record.uri?eid=2-s2.0-84994036111&doi=10.1016%2fj.eplepsyres.2016.10.006&partnerID=40&md5=804095f7fea30d5dea20b4c086edf010		Article	Final		Scopus	2-s2.0-84994036111
	Analysis of the correlation between febrile seizure and hot-spot polymorphism variation in SCN1A gene in children from Chongming County, Shanghai	2016	Ye G.-Y., Chen L., Dai H., Liu X.-Q.	Journal of Shanghai Jiaotong University (Medical Science)	36	11		1643	1647			10.3969/j.issn.1674-8115.2016.11.021	https://www.scopus.com/inward/record.uri?eid=2-s2.0-85003454662&doi=10.3969%2fj.issn.1674-8115.2016.11.021&partnerID=40&md5=37c53780a1040ec1e87aab3a3c69e43b		Article	Final		Scopus	2-s2.0-85003454662
	Clinical features of Dravet syndrome patients with SCN1A gene mutations	2016	Li D., Huang S.-P., Song T.-T., Yang L., Yang C.-H., Wang X.-Y.	Journal of Xi'an Jiaotong University (Medical Sciences)	37	6		841	845			10.7652/jdyxb201606014	https://www.scopus.com/inward/record.uri?eid=2-s2.0-84995610478&doi=10.7652%2fjdyxb201606014&partnerID=40&md5=97ba5c6d52076b92290e6b014492af3f		Article	Final		Scopus	2-s2.0-84995610478
	Ictal sinus pause and myoclonic seizure in a child	2016	Kim H.R., Kim G.-H., Eun S.-H., Eun B.-L., Byeon J.H.	Korean Journal of Pediatrics	59			S129	S132		1	10.3345/kjp.2016.59.11.S129	https://www.scopus.com/inward/record.uri?eid=2-s2.0-85001114562&doi=10.3345%2fkjp.2016.59.11.S129&partnerID=40&md5=9a19a0b0435a9fbb336fcd9a0f0dd2d8		Article	Final	All Open Access, Gold, Green	Scopus	2-s2.0-85001114562
	Allele and genotype frequencies of genes relevant to anti-epileptic drug therapy in Mexican-Mestizo healthy volunteers	2016	Fricke-Galindo I., Ortega-Vázquez A., Monroy-Jaramillo N., Dorado P., Jung-Cook H., Peñas-Lledó E., Llerena A., López-López M.	Pharmacogenomics	17	17		1913	1930		7	10.2217/pgs-2016-0078	https://www.scopus.com/inward/record.uri?eid=2-s2.0-84995427113&doi=10.2217%2fpgs-2016-0078&partnerID=40&md5=72f20ccbe2b0adcffb0dfa52b568af68		Article	Final		Scopus	2-s2.0-84995427113
26763045	Early-onset familial hemiplegic migraine due to a novel SCN1A mutation	2016	Fan C., Wolking S., Lehmann-Horn F., Hedrich U.B.S., Freilinger T., Lerche H., Borck G., Kubisch C., Jurkat-Rott K.	Cephalalgia	36	13		1238	1247		25	10.1177/0333102415608360	https://www.scopus.com/inward/record.uri?eid=2-s2.0-84994748488&doi=10.1177%2f0333102415608360&partnerID=40&md5=fd790864113b042e67e38aa68ef65893		Article	Final	All Open Access, Hybrid Gold, Green	Scopus	2-s2.0-84994748488
27726903	Diagnostic Yield of Epilepsy Panels in Children With Medication-Refractory Epilepsy	2016	Segal E., Pedro H., Valdez-Gonzalez K., Parisotto S., Gliksman F., Thompson S., Sabri J., Fertig E.	Pediatric Neurology	64			66	71		15	10.1016/j.pediatrneurol.2016.06.019	https://www.scopus.com/inward/record.uri?eid=2-s2.0-84992195144&doi=10.1016%2fj.pediatrneurol.2016.06.019&partnerID=40&md5=b5b4510d76ed312e4f8ee263f323cbf5		Article	Final		Scopus	2-s2.0-84992195144
27732919	Mortality in Dravet syndrome: A review	2016	Shmuely S., Sisodiya S.M., Gunning W.B., Sander J.W., Thijs R.D.	Epilepsy and Behavior	64			69	74		63	10.1016/j.yebeh.2016.09.007	https://www.scopus.com/inward/record.uri?eid=2-s2.0-84991490154&doi=10.1016%2fj.yebeh.2016.09.007&partnerID=40&md5=9d11256acda9398fa511e4ed47825a1e		Review	Final	All Open Access, Hybrid Gold, Green	Scopus	2-s2.0-84991490154
27155821	Clinical and electroencephalographic abnormalities during the full duration of a sporadic hemiplegic migraine attack [Modifications cliniques et électroencéphalographiques pendant toute la durée d'une attaque de migraine hémiplégique sporadique]	2016	Chastan N., Lebas A., Legoff F., Parain D., Guyant-Marechal L.	Neurophysiologie Clinique	46	4月5日		307	311		6	10.1016/j.neucli.2016.03.004	https://www.scopus.com/inward/record.uri?eid=2-s2.0-84964893136&doi=10.1016%2fj.neucli.2016.03.004&partnerID=40&md5=db7b14e19aaae85c2ba8537194ece0cb		Article	Final		Scopus	2-s2.0-84964893136
	Huperzine a provides robust and sustained protection against induced seizures in Scn1a mutant mice	2016	Wong J.C., Dutton S.B.B., Collins S.D., Schachter S., Escayg A.	Frontiers in Pharmacology	7	OCT	357				19	10.3389/fphar.2016.00357	https://www.scopus.com/inward/record.uri?eid=2-s2.0-84995380172&doi=10.3389%2ffphar.2016.00357&partnerID=40&md5=ce2694a2ba97c94985bef227828bf25c		Article	Final	All Open Access, Gold, Green	Scopus	2-s2.0-84995380172
27653866	Dravet syndrome with autism inherited from a paternal mosaic heterozygous mutation on SCN1A	2016	Xiong Z., Yi L., Cao D., He W., Chen J., Gao S., Sun X.	Journal of the Neurological Sciences	369			53	56		4	10.1016/j.jns.2016.07.038	https://www.scopus.com/inward/record.uri?eid=2-s2.0-84982690224&doi=10.1016%2fj.jns.2016.07.038&partnerID=40&md5=faad1c22c54cfcd2f8de773061e18ec1		Letter	Final		Scopus	2-s2.0-84982690224
27784474	Clinical features and gene mutations in epilepsy of infancy with migrating focal seizures	2016	Shang K.W., Zhang Y.H., Yang X.L., Liu A.J., Yang Z.X., Liu X.Y., Jiang Y.W., Wu X.R.	Zhonghua er ke za zhi = Chinese journal of pediatrics	54	10		735	739		4	10.3760/cma.j.issn.0578-1310.2016.10.005	https://www.scopus.com/inward/record.uri?eid=2-s2.0-85020374381&doi=10.3760%2fcma.j.issn.0578-1310.2016.10.005&partnerID=40&md5=7d77b8178fcca16ff3e5007694fedf91		Article	Final		Scopus	2-s2.0-85020374381
27768696	Fine Mapping of a Dravet Syndrome Modifier Locus on Mouse Chromosome 5 and Candidate Gene Analysis by RNA-Seq	2016	Hawkins N.A., Zachwieja N.J., Miller A.R., Anderson L.L., Kearney J.A.	PLoS Genetics	12	10	e1006398				38	10.1371/journal.pgen.1006398	https://www.scopus.com/inward/record.uri?eid=2-s2.0-84994301125&doi=10.1371%2fjournal.pgen.1006398&partnerID=40&md5=5d99acd15066608442246e24fd1c40c6		Article	Final	All Open Access, Gold, Green	Scopus	2-s2.0-84994301125
27497770	SCN1A Mutation or Cross Talk? The Connection Between the Heart and Brain	2016	Ozturk S., Yetkin E.	Pediatric Neurology	63			e3			2	10.1016/j.pediatrneurol.2016.05.003	https://www.scopus.com/inward/record.uri?eid=2-s2.0-84991275079&doi=10.1016%2fj.pediatrneurol.2016.05.003&partnerID=40&md5=757611e13ed11a7466f399209031de03		Letter	Final		Scopus	2-s2.0-84991275079
27498208	The potential implication of SCN1A and CYP3A5 genetic variants on antiepileptic drug resistance among Egyptian epileptic children	2016	Abo El Fotoh W.M.M., Abd el naby S.A.A., Habib M.S.E.-D., AL-refai A.A., Kasemy Z.A.	Seizure	41			75	80		16	10.1016/j.seizure.2016.07.005	https://www.scopus.com/inward/record.uri?eid=2-s2.0-84982694893&doi=10.1016%2fj.seizure.2016.07.005&partnerID=40&md5=2ff4a699209032eff409b6d0cba8ff60		Article	Final	All Open Access, Bronze	Scopus	2-s2.0-84982694893
27656030	Calpain activation in Alzheimer’s model mice is an artifact of APP and presenilin overexpression	2016	Saito T., Matsuba Y., Yamazaki N., Hashimoto S., Saido T.C.	Journal of Neuroscience	36	38		9933	9936		60	10.1523/JNEUROSCI.1907-16.2016	https://www.scopus.com/inward/record.uri?eid=2-s2.0-84988465009&doi=10.1523%2fJNEUROSCI.1907-16.2016&partnerID=40&md5=4b8ad40ad48b49e3ab14202ac94eaf11		Article	Final	All Open Access, Hybrid Gold, Green	Scopus	2-s2.0-84988465009
27538648	Cytokine-related and sodium channel polymorphism as candidate predisposing factors for childhood encephalopathy FIRES/AERRPS	2016	Saitoh M., Kobayashi K., Ohmori I., Tanaka Y., Tanaka K., Inoue T., Horino A., Ohmura K., Kumakura A., Takei Y., Hirabayashi S., Kajimoto M., Uchida T., Yamazaki S., Shiihara T., Kumagai T., Kasai M., Terashima H., Kubota M., Mizuguchi M.	Journal of the Neurological Sciences	368			272	276		22	10.1016/j.jns.2016.07.040	https://www.scopus.com/inward/record.uri?eid=2-s2.0-84978835910&doi=10.1016%2fj.jns.2016.07.040&partnerID=40&md5=759758f01d3e98b8b8580142cd75e1e0		Article	Final		Scopus	2-s2.0-84978835910
27582020	Temperature-dependent changes in neuronal dynamics in a patient with an SCN1A mutation and hyperthermia induced seizures	2016	Peters C., Rosch R.E., Hughes E., Ruben P.C.	Scientific Reports	6		31879				10	10.1038/srep31879	https://www.scopus.com/inward/record.uri?eid=2-s2.0-84984923551&doi=10.1038%2fsrep31879&partnerID=40&md5=a805d3dab1a45b67e3ef47f3882b348d		Article	Final	All Open Access, Gold, Green	Scopus	2-s2.0-84984923551
	Gene panel testing in epileptic encephalopathies and familial epilepsies	2016	Møller R.S., Larsen L.H.G., Johannesen K.M., Talvik I., Talvik T., Vaher U., Miranda M.J., Farooq M., Nielsen J.E.K., Lavard Svendsen L., Kjelgaard D.B., Linnet K.M., Hao Q., Uldall P., Frangu M., Tommerup N., Baig S.M., Abdullah U., Born A.P., Gellert P., Nikanorova M., Olofsson K., Jepsen B., Marjanovic D., Al-Zehhawi L.I.K., Peñalva S.J., Krag-Olsen B., Brusgaard K., Hjalgrim H., Rubboli G., P…	Molecular Syndromology	7	4		210	219		60	10.1159/000448369	https://www.scopus.com/inward/record.uri?eid=2-s2.0-84983748486&doi=10.1159%2f000448369&partnerID=40&md5=02be9653e57d2762aa6b38aeb6269eb7		Article	Final	All Open Access, Bronze, Green	Scopus	2-s2.0-84983748486
	Understanding genotypes and phenotypes in epileptic encephalopathies	2016	Helbig I., Abou Tayoun A.N.	Molecular Syndromology	7	4		172	181		50	10.1159/000448530	https://www.scopus.com/inward/record.uri?eid=2-s2.0-84983740959&doi=10.1159%2f000448530&partnerID=40&md5=bec5273cc5c00ac9cacc9877bd9e24bb		Review	Final	All Open Access, Bronze, Green	Scopus	2-s2.0-84983740959
27228124	Genetic polymorphisms and the adequacy of brain stimulation: state of the art	2016	Saghazadeh A., Esfahani S.A., Rezaei N.	Expert Review of Neurotherapeutics	16	9		1043	1054		2	10.1080/14737175.2016.1194202	https://www.scopus.com/inward/record.uri?eid=2-s2.0-84983077487&doi=10.1080%2f14737175.2016.1194202&partnerID=40&md5=dfd8a0ca0fba39c4fdcd1ec1eaa9eb34		Review	Final		Scopus	2-s2.0-84983077487
27245092	Evaluating the Role of Genetic Variants on first-line antiepileptic drug response in North India: Significance of SCN1A and GABRA1 Gene Variants in Phenytoin Monotherapy and its Serum Drug Levels	2016	Baghel R., Grover S., Kaur H., Jajodia A., Rawat C., Srivastava A., Kushwaha S., Agarwal R., Sharma S., Kukreti R.	CNS Neuroscience and Therapeutics	22	9		740	757		6	10.1111/cns.12570	https://www.scopus.com/inward/record.uri?eid=2-s2.0-84982903336&doi=10.1111%2fcns.12570&partnerID=40&md5=a88d1abac11a97b81c72aef84e975079		Article	Final	All Open Access, Bronze, Green	Scopus	2-s2.0-84982903336
27371789	PCDH19-related epilepsy and Dravet Syndrome: Face-off between two early-onset epilepsies with fever sensitivity	2016	Trivisano M., Pietrafusa N., Ciommo V.D., Cappelletti S., Palma L.D., Terracciano A., Bertini E., Vigevano F., Specchio N.	Epilepsy Research	125			32	36		17	10.1016/j.eplepsyres.2016.05.015	https://www.scopus.com/inward/record.uri?eid=2-s2.0-84978906222&doi=10.1016%2fj.eplepsyres.2016.05.015&partnerID=40&md5=14b38d865c734c6abc603aa84af8d650		Article	Final		Scopus	2-s2.0-84978906222
27389706	Patients with dravet syndrome in the era of stiripentol: A French cohort cross-sectional study	2016	De Liso P., Chemaly N., Laschet J., Barnerias C., Hully M., Leunen D., Desguerre I., Chiron C., Dulac O., Nabbout R.	Epilepsy Research	125			42	46		34	10.1016/j.eplepsyres.2016.05.012	https://www.scopus.com/inward/record.uri?eid=2-s2.0-84977263777&doi=10.1016%2fj.eplepsyres.2016.05.012&partnerID=40&md5=8532ba91a772af2f3c350af688652616		Article	Final		Scopus	2-s2.0-84977263777
27246997	Dynamic changes of depolarizing GABA in a computational model of epileptogenic brain: Insight for Dravet syndrome	2016	Kurbatova P., Wendling F., Kaminska A., Rosati A., Nabbout R., Guerrini R., Dulac O., Pons G., Cornu C., Nony P., Chiron C., Benquet P., Aarons L., Alberti C., Bajard A., Bertrand Y., Bretz F., Caudri D., Castellan C., Chabaud S., Dufour F., Eymard N., Fisch R., Jullien V., Kassai B., Malik S., Ogungbenro K., Pérol D., Tiddens H.	Experimental Neurology	283			57	72		16	10.1016/j.expneurol.2016.05.037	https://www.scopus.com/inward/record.uri?eid=2-s2.0-84973494464&doi=10.1016%2fj.expneurol.2016.05.037&partnerID=40&md5=316d61d4f0137fb09a8ac3fa2d6dcaef		Article	Final	All Open Access, Green	Scopus	2-s2.0-84973494464
27543003	Migraine genetics: From genome-wide association studies to translational insights	2016	Gormley P., Winsvold B.S., Nyholt D.R., Kallela M., Chasman D.I., Palotie A.	Genome Medicine	8	1	86				12	10.1186/s13073-016-0346-4	https://www.scopus.com/inward/record.uri?eid=2-s2.0-84982299727&doi=10.1186%2fs13073-016-0346-4&partnerID=40&md5=b1950461cdf40c253d50f6f0c6a2a115		Note	Final	All Open Access, Gold, Green	Scopus	2-s2.0-84982299727
27241786	Next-generation sequencing for diagnosis of Rare diseases in the neonatal intensive care unit	2016	Daoud H., Luco S.M., Li R., Bareke E., Beaulieu C., Jarinova O., Carson N., Nikkel S.M., Graham G.E., Richer J., Armour C., Bulman D.E., Chakraborty P., Geraghty M., Lines M.A., Lacaze-Masmonteil T., Majewski J., Boycott K.M., Dyment D.A.	CMAJ	188	11		E254	E260		53	10.1503/cmaj.150823	https://www.scopus.com/inward/record.uri?eid=2-s2.0-85016431907&doi=10.1503%2fcmaj.150823&partnerID=40&md5=5cec855e9611c83c1050533051c75390		Article	Final	All Open Access, Bronze, Green	Scopus	2-s2.0-85016431907
27267376	Aberrant epilepsy-associated mutant Nav1.6 sodium channel activity can be targeted with cannabidiol	2016	Patel R.R., Barbosa C., Brustovetsky T., Brustovetsky N., Cummins T.R.	Brain	139	8		2164	2181		69	10.1093/brain/aww129	https://www.scopus.com/inward/record.uri?eid=2-s2.0-84982912107&doi=10.1093%2fbrain%2faww129&partnerID=40&md5=4f97a6f9c59d18c193aae3f93376cd7a		Article	Final	All Open Access, Bronze, Green	Scopus	2-s2.0-84982912107
27473590	The genetic variants in 3' untranslated region of voltage-gated sodium channel alpha 1 subunit gene affect the mRNA-microRNA interactions and associate with epilepsy	2016	Li T., Kuang Y., Li B.	BMC Genetics	17	1	111				5	10.1186/s12863-016-0417-y	https://www.scopus.com/inward/record.uri?eid=2-s2.0-84979649223&doi=10.1186%2fs12863-016-0417-y&partnerID=40&md5=f04f69b19c5d6a5d03cd12545bc6a557		Article	Final	All Open Access, Gold, Green	Scopus	2-s2.0-84979649223
27458797	A deleterious Nav1.1 mutation selectively impairs telencephalic inhibitory neurons derived from Dravet Syndrome patients	2016	Sun Y., Paşca S.P., Portmann T., Goold C., Worringer K.A., Guan W., Chan K.C., Gai H., Vogt D., Chen Y.-J.J., Mao R., Chan K., Rubenstein J.L.R., Madison D.V., Hallmayer J., Froehlich-Santino W.M., Bernstein J.A., Dolmetsch R.E.	eLife	5	2016JULY	e13073				66	10.7554/eLife.13073	https://www.scopus.com/inward/record.uri?eid=2-s2.0-84979520533&doi=10.7554%2feLife.13073&partnerID=40&md5=55578c7278f331f85490375589e1d32f		Article	Final	All Open Access, Gold, Green	Scopus	2-s2.0-84979520533
27316245	Dravet syndrome	2016	Guerrini R., Striano P.	Neurology	87	3		245	246		3	10.1212/WNL.0000000000002873	https://www.scopus.com/inward/record.uri?eid=2-s2.0-84979266104&doi=10.1212%2fWNL.0000000000002873&partnerID=40&md5=426e380b777dae956e2e5520bb9105f5		Editorial	Final		Scopus	2-s2.0-84979266104
27316242	Motor neuropathy contributes to crouching in patients with Dravet syndrome	2016	Gitiaux C., Chemaly N., Quijano-Roy S., Barnerias C., Desguerre I., Hully M., Chiron C., Dulac O., Nabbout R.	Neurology	87	3		277	281		26	10.1212/WNL.0000000000002859	https://www.scopus.com/inward/record.uri?eid=2-s2.0-84979207955&doi=10.1212%2fWNL.0000000000002859&partnerID=40&md5=6a5349cccab19970ad2180526c2646d1		Article	Final		Scopus	2-s2.0-84979207955
	Pitfalls in genetic testing: The story of missed SCN1A mutations	2016	Djémié T., Weckhuysen S., Von Spiczak S., Carvill G.L., Jaehn J., Anttonen A.-K., Brilstra E., Caglayan H.S., De Kovel C.G., Depienne C., Gaily E., Gennaro E., Giraldez B.G., Gormley P., López R.G., Guerrini R., Hämäläinen E., Hartmann C., Hernandez L.H., Hjalgrim H., Koeleman B.P.C., Leguern E., Lehesjoki A.-E., Lemke J.R., Leu C., Marini C., McMahon J.M., Mei D., Møller R.S., Muhle H., Myers C.…	Molecular Genetics and Genomic Medicine	4	4		457	464		41	10.1002/mgg3.217	https://www.scopus.com/inward/record.uri?eid=2-s2.0-85013625371&doi=10.1002%2fmgg3.217&partnerID=40&md5=fe92117bd120d0b648b23d4fae0d1b9f		Article	Final	All Open Access, Gold, Green	Scopus	2-s2.0-85013625371
27270488	SCN8A encephalopathy: Research progress and prospects	2016	Meisler M.H., Helman G., Hammer M.F., Fureman B.E., Gaillard W.D., Goldin A.L., Hirose S., Ishii A., Kroner B.L., Lossin C., Mefford H.C., Parent J.M., Patel M., Schreiber J., Stewart R., Whittemore V., Wilcox K., Wagnon J.L., Pearl P.L., Vanderver A., Scheffer I.E.	Epilepsia	57	7		1027	1035		81	10.1111/epi.13422	https://www.scopus.com/inward/record.uri?eid=2-s2.0-84977583395&doi=10.1111%2fepi.13422&partnerID=40&md5=7ca3a7db18866abc42a531d42c60d0c8		Article	Final	All Open Access, Bronze, Green	Scopus	2-s2.0-84977583395
27197941	Five-year extended follow-up status of 10 patients with Dravet syndrome treated with fenfluramine	2016	Ceulemans B., Schoonjans A.-S., Marchau F., Paelinck B.P., Lagae L.	Epilepsia	57	7		e129	e134		67	10.1111/epi.13407	https://www.scopus.com/inward/record.uri?eid=2-s2.0-84977488478&doi=10.1111%2fepi.13407&partnerID=40&md5=127307293b8e6c31ce315e41234f6189		Article	Final	All Open Access, Hybrid Gold, Green	Scopus	2-s2.0-84977488478
26716362	Mosaic mutations in early-onset genetic diseases	2016	Halvorsen M., Petrovski S., Shellhaas R., Tang Y., Crandall L., Goldstein D., Devinsky O.	Genetics in Medicine	18	7		746	749		34	10.1038/gim.2015.155	https://www.scopus.com/inward/record.uri?eid=2-s2.0-84977079621&doi=10.1038%2fgim.2015.155&partnerID=40&md5=dfe5ee556defe0cb119b6359eaea5c15		Article	Final	All Open Access, Bronze, Green	Scopus	2-s2.0-84977079621
27106592	Association study of MiRSNPs with schizophrenia, tardive dyskinesia and cognition	2016	John J., Bhatia T., Kukshal P., Chandna P., Nimgaonkar V.L., Deshpande S.N., Thelma B.K.	Schizophrenia Research	174	1月3日		29	34		12	10.1016/j.schres.2016.03.031	https://www.scopus.com/inward/record.uri?eid=2-s2.0-84971671272&doi=10.1016%2fj.schres.2016.03.031&partnerID=40&md5=64ee643934f8a77ef6d9c4bb58334453		Article	Final	All Open Access, Green	Scopus	2-s2.0-84971671272
27236449	SCN1A gene sequencing in 46 Turkish epilepsy patients disclosed 12 novel mutations	2016	Usluer S., Salar S., Arslan M., Yiş U., Kara B., Tektürk P., Baykan B., Meral C., Türkdoǧan D., Bebek N., Yalçin Çapan Ö., Gündoǧdu Eken A., Çaǧlayan S.H.	Seizure	39			34	43		7	10.1016/j.seizure.2016.05.008	https://www.scopus.com/inward/record.uri?eid=2-s2.0-84971221485&doi=10.1016%2fj.seizure.2016.05.008&partnerID=40&md5=d26a1709a1ed3687f337f66181a69385		Article	Final	All Open Access, Bronze	Scopus	2-s2.0-84971221485
27209029	Dravet syndrome with favourable cognitive and behavioral development due to a novel SCN1A frameshift mutation	2016	Jiang P., Shen J., Yu Y., Jiang L., Xu J., Xu L., Yu H., Gao F.	Clinical Neurology and Neurosurgery	146			144	146		2	10.1016/j.clineuro.2016.05.008	https://www.scopus.com/inward/record.uri?eid=2-s2.0-84969962033&doi=10.1016%2fj.clineuro.2016.05.008&partnerID=40&md5=f45fa6180fc6086878109646dfff8410		Article	Final		Scopus	2-s2.0-84969962033
	ATP1A2 mutations in migraine: Seeing through the facets of an ion pump onto the neurobiology of disease	2016	Friedrich T., Tavraz N.N., Junghans C.	Frontiers in Physiology	7	JUN	239				37	10.3389/fphys.2016.00239	https://www.scopus.com/inward/record.uri?eid=2-s2.0-84977607454&doi=10.3389%2ffphys.2016.00239&partnerID=40&md5=4c2960f80dda84ac86f379c3611977e4		Review	Final	All Open Access, Gold, Green	Scopus	2-s2.0-84977607454
27281198	Selective spider toxins reveal a role for the Nav1.1 channel in mechanical pain	2016	Osteen J.D., Herzig V., Gilchrist J., Emrick J.J., Zhang C., Wang X., Castro J., Garcia-Caraballo S., Grundy L., Rychkov G.Y., Weyer A.D., Dekan Z., Undheim E.A.B., Alewood P., Stucky C.L., Brierley S.M., Basbaum A.I., Bosmans F., King G.F., Julius D.	Nature	534	7608		494	499		163	10.1038/nature17976	https://www.scopus.com/inward/record.uri?eid=2-s2.0-84975781988&doi=10.1038%2fnature17976&partnerID=40&md5=ec473f7275e1af63e79745737a588d86		Article	Final	All Open Access, Green	Scopus	2-s2.0-84975781988
26841829	Establishment of isogenic iPSCs from an individual with SCN1A mutation mosaicism as a model for investigating neurocognitive impairment in Dravet syndrome	2016	Maeda H., Chiyonobu T., Yoshida M., Yamashita S., Zuiki M., Kidowaki S., Isoda K., Yamakawa K., Morimoto M., Nakahata T., Saito M.K., Hosoi H.	Journal of Human Genetics	61	6		565	569		15	10.1038/jhg.2016.5	https://www.scopus.com/inward/record.uri?eid=2-s2.0-84976565385&doi=10.1038%2fjhg.2016.5&partnerID=40&md5=04411830cee6323ca5a07d9249d4cb42		Article	Final	All Open Access, Bronze	Scopus	2-s2.0-84976565385
	Acute encephalopathy in Dravet syndrome: Case reports and literature review	2016	Do T.T.H., Huynh T.T.K., Van Le T.K.	Neurology Asia	21	2		181	185		3		https://www.scopus.com/inward/record.uri?eid=2-s2.0-84976384270&partnerID=40&md5=fdbbfa41ecd33a8de4f4dfcd8bd45839		Review	Final		Scopus	2-s2.0-84976384270
27264139	Dravet Syndrome: Diagnosis and Long-Term Course	2016	Connolly M.B.	Canadian Journal of Neurological Sciences	43	S3		S3	S8		43	10.1017/cjn.2016.243	https://www.scopus.com/inward/record.uri?eid=2-s2.0-84973316238&doi=10.1017%2fcjn.2016.243&partnerID=40&md5=8f0f7465e11f7bb973e4640bdb877775		Review	Final	All Open Access, Bronze	Scopus	2-s2.0-84973316238
	Prognostic Challenges of SCN1A Genetic Mutations: Report on Two Children with Mild Features	2016	Praticò A.D., Falsaperla R., Ruggieri M., Corsello G., Pavone P.	Journal of Pediatric Neurology	14	2		82	88		36	10.1055/s-0036-1583274	https://www.scopus.com/inward/record.uri?eid=2-s2.0-84964668149&doi=10.1055%2fs-0036-1583274&partnerID=40&md5=82083b2e3c6527043a12ff9be1e32fb1		Article	Final		Scopus	2-s2.0-84964668149
26995749	β1-Adrenergic blocker bisoprolol reverses down-regulated ion channels in sinoatrial node of heart failure rats	2016	Du Y., Zhang J., Xi Y., Wu G., Han K., Huang X., Ma A., Wang T.	Journal of Physiology and Biochemistry	72	2		293	302		6	10.1007/s13105-016-0481-9	https://www.scopus.com/inward/record.uri?eid=2-s2.0-84961208806&doi=10.1007%2fs13105-016-0481-9&partnerID=40&md5=c853ba077d11536d5d64c7e71648695e		Article	Final		Scopus	2-s2.0-84961208806
26966048	Pharmacotherapy for Dravet Syndrome	2016	Wallace A., Wirrell E., Kenney-Jung D.L.	Pediatric Drugs	18	3		197	208		34	10.1007/s40272-016-0171-7	https://www.scopus.com/inward/record.uri?eid=2-s2.0-84960358127&doi=10.1007%2fs40272-016-0171-7&partnerID=40&md5=6cb6dcd9eedd819358d798e5636cede3		Review	Final		Scopus	2-s2.0-84960358127
	Mutations of Voltage-Gated Sodium Channel Genes SCN1A and SCN2A in Epilepsy, Intellectual Disability, and Autism	2016	Yamakawa K.	Neuronal and Synaptic Dysfunction in Autism Spectrum Disorder and Intellectual Disability				233	251		7	10.1016/B978-0-12-800109-7.00015-7	https://www.scopus.com/inward/record.uri?eid=2-s2.0-85011729164&doi=10.1016%2fB978-0-12-800109-7.00015-7&partnerID=40&md5=a725b93e33c98453a763e75ff3f0c32e		Book Chapter	Final		Scopus	2-s2.0-85011729164
27143072	Genotype and phenotype of female Dravet syndrome with PCDH19 mutations	2016	Liu A.J., Zhang Y.H., Xu X.J., Yang X.L., Yang Z.X., Wu Y., Liu X.Y., Jiang Y.W., Wu X.R.	Zhonghua er ke za zhi = Chinese journal of pediatrics	54	5		327	331		2	10.3760/cma.j.issn.0578-1310.2016.05.004	https://www.scopus.com/inward/record.uri?eid=2-s2.0-85021850747&doi=10.3760%2fcma.j.issn.0578-1310.2016.05.004&partnerID=40&md5=1a8c2795e3c5e6379b65462179662ebc		Article	Final		Scopus	2-s2.0-85021850747
26995069	Prevalence and Characteristics of Vaccination Triggered Seizures in Dravet Syndrome in Hong Kong: A Retrospective Study	2016	Wong P.T.Y., Wong V.C.-N.	Pediatric Neurology	58			41	47		3	10.1016/j.pediatrneurol.2016.01.011	https://www.scopus.com/inward/record.uri?eid=2-s2.0-84961223768&doi=10.1016%2fj.pediatrneurol.2016.01.011&partnerID=40&md5=6547d2689ffa92a14f1dc8622604933b		Article	Final		Scopus	2-s2.0-84961223768
	Focal genetic epilepsy syndromes: New findings [Fokale genetisch bedingte Epilepsiesyndrome: Neue Erkenntnisse in der Entstehung]	2016	Neubauer B.A., Hahn A.	Zeitschrift fur Epileptologie	29	2		57	62		3	10.1007/s10309-015-0032-3	https://www.scopus.com/inward/record.uri?eid=2-s2.0-84949951217&doi=10.1007%2fs10309-015-0032-3&partnerID=40&md5=5ad3d9e0f2e7b2db260cc34efbad688d		Article	Final		Scopus	2-s2.0-84949951217
27029629	A targeted resequencing gene panel for focal epilepsy	2016	Hildebrand M.S., Myers C.T., Carvill G.L., Regan B.M., Damiano J.A., Mullen S.A., Newton M.R., Nair U., Gazina E.V., Milligan C.J., Reid C.A., Petrou S., Scheffer I.E., Berkovic S.F., Mefford H.C.	Neurology	86	17		1605	1612		33	10.1212/WNL.0000000000002608	https://www.scopus.com/inward/record.uri?eid=2-s2.0-84964807830&doi=10.1212%2fWNL.0000000000002608&partnerID=40&md5=ba6ae9584a42a0b00aa2edf15dbb8ef0		Article	Final	All Open Access, Green	Scopus	2-s2.0-84964807830
27113213	Pathogenic copy number variants and SCN1A mutations in patients with intellectual disability and childhood-onset epilepsy	2016	Fry A.E., Rees E., Thompson R., Mantripragada K., Blake P., Jones G., Morgan S., Jose S., Mugalaasi H., Archer H., McCann E., Clarke A., Taylor C., Davies S., Gibbon F., Te Water Naude J., Hartley L., Thomas G., White C., Natarajan J., Thomas R.H., Drew C., Chung S.-K., Rees M.I., Holmans P., Owen M.J., Kirov G., Pilz D.T., Kerr M.P.	BMC Medical Genetics	17	1	34				16	10.1186/s12881-016-0294-2	https://www.scopus.com/inward/record.uri?eid=2-s2.0-84964329781&doi=10.1186%2fs12881-016-0294-2&partnerID=40&md5=11957bd4430b72b768f807e8a2e2d73f		Article	Final	All Open Access, Gold, Green	Scopus	2-s2.0-84964329781
26843603	Model systems for studying cellular mechanisms of SCN1A-related epilepsy	2016	Schutte S.S., Schutte R.J., Barragan E.V., O’Dowd D.K.	Journal of Neurophysiology	115	4		1755	1766		24	10.1152/jn.00824.2015	https://www.scopus.com/inward/record.uri?eid=2-s2.0-84984650230&doi=10.1152%2fjn.00824.2015&partnerID=40&md5=c71c0c4ac22e284a87d34c53346f995d		Review	Final	All Open Access, Green	Scopus	2-s2.0-84984650230
26819275	Unaltered Network Activity and Interneuronal Firing during Spontaneous Cortical Dynamics in Vivo in a Mouse Model of Severe Myoclonic Epilepsy of Infancy	2016	De Stasi A.M., Farisello P., Marcon I., Cavallari S., Forli A., Vecchia D., Losi G., Mantegazza M., Panzeri S., Carmignoto G., Bacci A., Fellin T.	Cerebral Cortex	26	4		1778	1794		35	10.1093/cercor/bhw002	https://www.scopus.com/inward/record.uri?eid=2-s2.0-84963831414&doi=10.1093%2fcercor%2fbhw002&partnerID=40&md5=ed57b4d62cd15954c9dc0e18504faebf		Article	Final	All Open Access, Hybrid Gold, Green	Scopus	2-s2.0-84963831414
26974309	Cleavage of Na+ channels by calpain increases persistent Na+ current and promotes spasticity after spinal cord injury	2016	Brocard C., Plantier V., Boulenguez P., Liabeuf S., Bouhadfane M., Viallat-Lieutaud A., Vinay L., Brocard F.	Nature Medicine	22	4		404	411		42	10.1038/nm.4061	https://www.scopus.com/inward/record.uri?eid=2-s2.0-84961223753&doi=10.1038%2fnm.4061&partnerID=40&md5=56ca31c920cdbec2a09f74daa2c49800		Article	Final	All Open Access, Green	Scopus	2-s2.0-84961223753
27021235	Parental mosaicism in another case of Dravet syndrome caused by a novel SCN1A deletion: A case report	2016	Sharkia R., Hengel H., Schöls L., Athamna M., Bauer P., Mahajnah M.	Journal of Medical Case Reports	10	1	67				3	10.1186/s13256-016-0854-2	https://www.scopus.com/inward/record.uri?eid=2-s2.0-84964005069&doi=10.1186%2fs13256-016-0854-2&partnerID=40&md5=ccef6d2ed1b9e484dd027b577c2537af		Article	Final	All Open Access, Gold, Green	Scopus	2-s2.0-84964005069
26985722	Unifying Views of Autism Spectrum Disorders: A Consideration of Autoregulatory Feedback Loops	2016	Mullins C., Fishell G., Tsien R.W.	Neuron	89	6		1131	1156		92	10.1016/j.neuron.2016.02.017	https://www.scopus.com/inward/record.uri?eid=2-s2.0-84960934845&doi=10.1016%2fj.neuron.2016.02.017&partnerID=40&md5=dfa1d7ca429add009437192e1053c9d3		Review	Final	All Open Access, Bronze, Green	Scopus	2-s2.0-84960934845
	Migraine in the era of precision medicine	2016	Zhang L.-M., Dong Z., Yu S.-Y.	Annals of Translational Medicine	4	6	105				11	10.21037/atm.2016.03.13	https://www.scopus.com/inward/record.uri?eid=2-s2.0-85006197339&doi=10.21037%2fatm.2016.03.13&partnerID=40&md5=907b29e3c215d186487d7bc2ed81255f		Article	Final	All Open Access, Green	Scopus	2-s2.0-85006197339
26990884	Evaluation of presumably disease causing SCN1A variants in a cohort of common epilepsy syndromes	2016	Lal D., Reinthaler E.M., Dejanovic B., May P., Thiele H., Lehesjoki A.-E., Schwarz G., Riesch E., Ikram M.A., Van Duijn C.M., Uitterlinden A.G., Hofman A., Steinböck H., Gruber-Sedlmayr U., Neophytou B., Zara F., Hahn A., Gormley P., Becker F., Weber Y.G., Cilio M.R., Kunz W.S., Krause R., Zimprich F., Lemke J.R., Nürnberg P., Sander T., Lerche H., Neubauer B.A., Palotie A., Ruppert A.-K., Suls A…	PLoS ONE	11	3	e0150426				10	10.1371/journal.pone.0150426	https://www.scopus.com/inward/record.uri?eid=2-s2.0-84962195598&doi=10.1371%2fjournal.pone.0150426&partnerID=40&md5=7f2b6e329dbe50f67492b12da7942524		Article	Final	All Open Access, Gold, Green	Scopus	2-s2.0-84962195598
26978272	Cognitive deficits associated with Nav1.1 alterations: Involvement of neuronal firing dynamics and oscillations	2016	Bender A.C., Luikart B.W., Lenck-Santini P.-P.	PLoS ONE	11	3	e0151538				15	10.1371/journal.pone.0151538	https://www.scopus.com/inward/record.uri?eid=2-s2.0-84961589890&doi=10.1371%2fjournal.pone.0151538&partnerID=40&md5=984aa1aa7c98f41b0784243248f0e0a7		Article	Final	All Open Access, Gold, Green	Scopus	2-s2.0-84961589890
26694226	Scn1a dysfunction alters behavior but not the effect of stress on seizure response	2016	Sawyer N.T., Helvig A.W., Makinson C.D., Decker M.J., Neigh G.N., Escayg A.	Genes, Brain and Behavior	15	3		335	347		14	10.1111/gbb.12281	https://www.scopus.com/inward/record.uri?eid=2-s2.0-84959517659&doi=10.1111%2fgbb.12281&partnerID=40&md5=8c85a27764e5098efc5d2ee1ae4d4b20		Article	Final	All Open Access, Bronze	Scopus	2-s2.0-84959517659
26423924	Genetic investigation of sudden unexpected death in epilepsy cohort by panel target resequencing	2016	Coll M., Allegue C., Partemi S., Mates J., Del Olmo B., Campuzano O., Pascali V., Iglesias A., Striano P., Oliva A., Brugada R.	International Journal of Legal Medicine	130	2		331	339		36	10.1007/s00414-015-1269-0	https://www.scopus.com/inward/record.uri?eid=2-s2.0-84959105656&doi=10.1007%2fs00414-015-1269-0&partnerID=40&md5=adac5dbcec3051fa21aa8e0eed11b2c4		Article	Final		Scopus	2-s2.0-84959105656
26790420	Src family tyrosine kinase inhibitors suppress Nav1.1 expression in cultured rat spiral ganglion neurons	2016	Chen H., Zeng Q., Yao C., Cai Z., Wei T., Huang Z., Su J.	Journal of Comparative Physiology A: Neuroethology, Sensory, Neural, and Behavioral Physiology	202	3		185	193		2	10.1007/s00359-016-1066-3	https://www.scopus.com/inward/record.uri?eid=2-s2.0-84958776680&doi=10.1007%2fs00359-016-1066-3&partnerID=40&md5=d3fef7dbb535340a3675729bc3d8d587		Article	Final		Scopus	2-s2.0-84958776680
26503606	An update on transcriptional and post-translational regulation of brain voltage-gated sodium channels	2016	Onwuli D.O., Beltran-Alvarez P.	Amino Acids	48	3		641	651		17	10.1007/s00726-015-2122-y	https://www.scopus.com/inward/record.uri?eid=2-s2.0-84958214652&doi=10.1007%2fs00726-015-2122-y&partnerID=40&md5=ce18f2d87543a5f41a161a66551a48a4		Article	Final	All Open Access, Hybrid Gold, Green	Scopus	2-s2.0-84958214652
26482601	High prevalence of genetic alterations in early-onset epileptic encephalopathies associated with infantile movement disorders	2016	Kobayashi Y., Tohyama J., Kato M., Akasaka N., Magara S., Kawashima H., Ohashi T., Shiraishi H., Nakashima M., Saitsu H., Matsumoto N.	Brain and Development	38	3		285	292		41	10.1016/j.braindev.2015.09.011	https://www.scopus.com/inward/record.uri?eid=2-s2.0-84958165421&doi=10.1016%2fj.braindev.2015.09.011&partnerID=40&md5=d1ff286121edce9f83dbc54b918351b7		Article	Final	All Open Access, Bronze	Scopus	2-s2.0-84958165421
26271793	Diagnostic Approach to Genetic Causes of Early-Onset Epileptic Encephalopathy	2016	Gürsoy S., Erçal D.	Journal of Child Neurology	31	4		523	532		44	10.1177/0883073815599262	https://www.scopus.com/inward/record.uri?eid=2-s2.0-84957942171&doi=10.1177%2f0883073815599262&partnerID=40&md5=0dee2eaef7f490054c12e38c86d4d78c		Review	Final		Scopus	2-s2.0-84957942171
26803335	Supraventricular Tachycardia during Status Epilepticus in Dravet Syndrome: A Link between Brain and Heart?	2016	Daverio M., Ciccone O., Boniver C., De Palma L., Corrado D., Vecchi M.	Pediatric Neurology	56			69	71		6	10.1016/j.pediatrneurol.2015.12.003	https://www.scopus.com/inward/record.uri?eid=2-s2.0-84955255187&doi=10.1016%2fj.pediatrneurol.2015.12.003&partnerID=40&md5=a5722af93e393fe7433d63871871a421		Article	Final		Scopus	2-s2.0-84955255187
26917491	Molecular subtyping and improved treatment of neurodevelopmental disease	2016	Stessman H.A.F., Turner T.N., Eichler E.E.	Genome Medicine	8	1	22				11	10.1186/s13073-016-0278-z	https://www.scopus.com/inward/record.uri?eid=2-s2.0-84959117495&doi=10.1186%2fs13073-016-0278-z&partnerID=40&md5=c968a2a1f3344e5cddfb688038c6e837		Article	Final	All Open Access, Gold, Green	Scopus	2-s2.0-84959117495
26802095	Multiplex families with epilepsy: Success of clinical and molecular genetic characterization	2016	Afawi Z., Oliver K.L., Kivity S., Mazarib A., Blatt I., Neufeld M.Y., Helbig K.L., Goldberg-Stern H., Misk A.J., Straussberg R., Walid S., Mahajnah M., Lerman-Sagie T., Ben-Zeev B., Kahana E., Masalha R., Kramer U., Ekstein D., Shorer Z., Wallace R.H., Mangelsdorf M., MacPherson J.N., Carvill G.L., Mefford H.C., Jackson G.D., Scheffer I.E., Bahlo M., Gecz J., Heron S.E., Corbett M., Mulley J.C., …	Neurology	86	8		713	722		18	10.1212/WNL.0000000000002404	https://www.scopus.com/inward/record.uri?eid=2-s2.0-84959235712&doi=10.1212%2fWNL.0000000000002404&partnerID=40&md5=7f770e778b6dba3df4bc761870613afa		Article	Final	All Open Access, Green	Scopus	2-s2.0-84959235712
26889571	Reflex Seizures Triggered by Diaper Change in Dravet Syndrome	2016	Subki A.H., Alasmari A.S., Jan F.M., Moria F.A., Jan M.M.	Canadian Journal of Neurological Sciences	43	4		585	587		3	10.1017/cjn.2015.394	https://www.scopus.com/inward/record.uri?eid=2-s2.0-84975721159&doi=10.1017%2fcjn.2015.394&partnerID=40&md5=3cc44d073789b83c1c94bcd16735090f		Article	Final	All Open Access, Bronze	Scopus	2-s2.0-84975721159
	Pathogenic mechanism of recurrent mutations of SCN8A in epileptic encephalopathy	2016	Wagnon J.L., Barker B.S., Hounshell J.A., Haaxma C.A., Shealy A., Moss T., Parikh S., Messer R.D., Patel M.K., Meisler M.H.	Annals of Clinical and Translational Neurology	3	2		114	123		62	10.1002/acn3.276	https://www.scopus.com/inward/record.uri?eid=2-s2.0-84977544088&doi=10.1002%2facn3.276&partnerID=40&md5=c18f38fdba5520bce92e75e427e074c8		Article	Final	All Open Access, Gold, Green	Scopus	2-s2.0-84977544088
27017028	The Comorbidity of Migraine and Epilepsy in Children and Adolescents	2016	Sowell M.K., Youssef P.E.	Seminars in Pediatric Neurology	23	1		83	91		15	10.1016/j.spen.2016.01.012	https://www.scopus.com/inward/record.uri?eid=2-s2.0-84959933165&doi=10.1016%2fj.spen.2016.01.012&partnerID=40&md5=ccc091fb641ec53280a2acd9ee9e5b95		Article	Final		Scopus	2-s2.0-84959933165
26845707	Comprehensive molecular testing in patients with high functioning autism spectrum disorder	2016	Alvarez-Mora M.I., Calvo Escalona R., Puig Navarro O., Madrigal I., Quintela I., Amigo J., Martinez-Elurbe D., Linder-Lucht M., Aznar Lain G., Carracedo A., Mila M., Rodriguez-Revenga L.	Mutation Research - Fundamental and Molecular Mechanisms of Mutagenesis	784-785			46	52		15	10.1016/j.mrfmmm.2015.12.006	https://www.scopus.com/inward/record.uri?eid=2-s2.0-84956608209&doi=10.1016%2fj.mrfmmm.2015.12.006&partnerID=40&md5=b6921766551de8d1c042c031d8f9f8b7		Article	Final		Scopus	2-s2.0-84956608209
26747084	Genetic studies of Polish migraine patients: Screening for causative mutations in four migraine-associated genes	2016	Domitrz I., Kosiorek M., Zekanowski C., Kaminska A.	Human Genomics	10	1					5	10.1186/s40246-015-0057-8	https://www.scopus.com/inward/record.uri?eid=2-s2.0-84953323880&doi=10.1186%2fs40246-015-0057-8&partnerID=40&md5=2f795c9caf8167181b63f662453f7738		Article	Final	All Open Access, Gold, Green	Scopus	2-s2.0-84953323880
26731440	CRISPR/Cas9 facilitates investigation of neural circuit disease using human iPSCs: Mechanism of epilepsy caused by an SCN1A loss-of-function mutation	2016	Liu J., Gao C., Chen W., Ma W., Li X., Shi Y., Zhang H., Zhang L., Long Y., Xu H., Guo X., Deng S., Yan X., Yu D., Pan G., Chen Y., Lai L., Liao W., Li Z.	Translational Psychiatry	6		203				61	10.1038/tp.2015.203	https://www.scopus.com/inward/record.uri?eid=2-s2.0-84953726026&doi=10.1038%2ftp.2015.203&partnerID=40&md5=e837f1cf3da1bb80868dc8359722e155		Article	Final	All Open Access, Gold, Green	Scopus	2-s2.0-84953726026
26559170	Barriers to the use of genetic information for the development of new epilepsy treatments	2016	Ferraro T.N.	Expert Review of Neurotherapeutics	16	1		5	8		1	10.1586/14737175.2016.1115718	https://www.scopus.com/inward/record.uri?eid=2-s2.0-84955358516&doi=10.1586%2f14737175.2016.1115718&partnerID=40&md5=ed083b905a10d4e412829dd7ae8255af		Editorial	Final	All Open Access, Bronze	Scopus	2-s2.0-84955358516
	Sodium channel mutations that cause genetic epilepsy with febrile seizures plus	2016	Goldin A.L.	The Curated Reference Collection in Neuroscience and Biobehavioral Psychology				669	676			10.1016/B978-0-12-809324-5.00113-9	https://www.scopus.com/inward/record.uri?eid=2-s2.0-85079569019&doi=10.1016%2fB978-0-12-809324-5.00113-9&partnerID=40&md5=1ccad98555486e436b664d39be9d246e		Book Chapter	Final		Scopus	2-s2.0-85079569019
28005050	Genetics and treatment of early infantile epileptic encephalopathies [Genetika i differentsirovannoe lechenie rannikh epilepticheskikh entsefalopatii]	2016	Sharkov A.A., Sharkova I.V., Belousova E.D., Dadali E.L.	Zhurnal nevrologii i psikhiatrii imeni S.S. Korsakova	116	9 Vyp 2		67	73		4	10.17116/jnevro20161169267-73	https://www.scopus.com/inward/record.uri?eid=2-s2.0-85056411936&doi=10.17116%2fjnevro20161169267-73&partnerID=40&md5=6f3f462e1244c77c5f3ed6b2b04d6c77		Article	Final		Scopus	2-s2.0-85056411936
	Expecting the unexpected: Lack of in vivo network defects in an Scn1a model of Dravet Syndrome	2016	Hull J.M., Isom L.L.	Epilepsy Currents	16	6		408	410		2	10.5698/1535-7511-16.6.408	https://www.scopus.com/inward/record.uri?eid=2-s2.0-85018484620&doi=10.5698%2f1535-7511-16.6.408&partnerID=40&md5=9d751c3ef3ee3bec67cf1fc7eceb1e84		Article	Final	All Open Access, Bronze, Green	Scopus	2-s2.0-85018484620
27815510	Voltage-gated sodium channels and pain-related disorders	2016	Kanellopoulos A.H., Matsuyama A.	Clinical Science	130	24		2257	2265		9	10.1042/CS20160041	https://www.scopus.com/inward/record.uri?eid=2-s2.0-85014071973&doi=10.1042%2fCS20160041&partnerID=40&md5=4f68dca0b10d8fa0a5bf306a3d1b5254		Article	Final		Scopus	2-s2.0-85014071973
28005047	The diagnosis of idiopathic epilepsy in children based on the algorithm of molecular-genetic studies	2016	Kozhanova T.V., Zhylina S.S., Aivazian S.O., Ananyeva T.V., Abramov A.A., Belenikin M.S., Meshcheryakova T.I., Mutovin G.R., Zavadenko N.N.	Zhurnal Nevrologii i Psihiatrii imeni S.S. Korsakova	116	Special Issue 9		49	56			10.17116/jnevro20161169249-56	https://www.scopus.com/inward/record.uri?eid=2-s2.0-85010789107&doi=10.17116%2fjnevro20161169249-56&partnerID=40&md5=0f5621ae9ee6d7b19b8c7cc6342019f5		Article	Final		Scopus	2-s2.0-85010789107
27066534	Altered glycolysis and mitochondrial respiration in a zebrafish model of Dravet syndrome	2016	Kumar M.G., Rowley S., Fulton R., Dinday M.T., Baraban S.C., Patel M.	eNeuro	3	2		1002	1011		32	10.1523/ENEURO.0008-16.2016	https://www.scopus.com/inward/record.uri?eid=2-s2.0-85002714982&doi=10.1523%2fENEURO.0008-16.2016&partnerID=40&md5=32fd3de9a271370808429733aa9ad6ee		Article	Final	All Open Access, Gold, Green	Scopus	2-s2.0-85002714982
27045673	Novel SCN1A variants in Dravet syndrome and evaluating a wide approach of patient selection	2016	Surovy M., Soltysova A., Kolnikova M., Sykora P., Ilencikova D., Ficek A., Radvanszky J., Kadasi L.	General Physiology and Biophysics	35	3		333	342		3	10.4149/gpb_2016002	https://www.scopus.com/inward/record.uri?eid=2-s2.0-84974802799&doi=10.4149%2fgpb_2016002&partnerID=40&md5=25f483e143c07886c27230a7c0a53a46		Article	Final	All Open Access, Bronze	Scopus	2-s2.0-84974802799
27333023	Upregulation of Haploinsufficient Gene Expression in the Brain by Targeting a Long Non-coding RNA Improves Seizure Phenotype in a Model of Dravet Syndrome	2016	Hsiao J., Yuan T.Y., Tsai M.S., Lu C.Y., Lin Y.C., Lee M.L., Lin S.W., Chang F.C., Liu Pimentel H., Olive C., Coito C., Shen G., Young M., Thorne T., Lawrence M., Magistri M., Faghihi M.A., Khorkova O., Wahlestedt C.	EBioMedicine	9			257	277		64	10.1016/j.ebiom.2016.05.011	https://www.scopus.com/inward/record.uri?eid=2-s2.0-84970044611&doi=10.1016%2fj.ebiom.2016.05.011&partnerID=40&md5=164977e13d8befc8192387d3f58dd888		Article	Final	All Open Access, Gold, Green	Scopus	2-s2.0-84970044611
26993267	Improving diagnosis and broadening the phenotypes in early-onset seizure and severe developmental delay disorders through gene panel analysis	2016	Trump N., McTague A., Brittain H., Papandreou A., Meyer E., Ngoh A., Palmer R., Morrogh D., Boustred C., Hurst J.A., Jenkins L., Kurian M.A., Scott R.H.	Journal of Medical Genetics	53	5		310	317		125	10.1136/jmedgenet-2015-103263	https://www.scopus.com/inward/record.uri?eid=2-s2.0-84969571238&doi=10.1136%2fjmedgenet-2015-103263&partnerID=40&md5=27540bdc914fff6e4d77df4541edf935		Article	Final	All Open Access, Hybrid Gold, Green	Scopus	2-s2.0-84969571238
	Genetic testing in epileptic encephalopathy: Rosetta stone or just an expensive rock?	2016	Scott Perry M.	Epilepsy Currents	16	1		12	13			10.5698/1535-7597-16.1.12	https://www.scopus.com/inward/record.uri?eid=2-s2.0-84958182513&doi=10.5698%2f1535-7597-16.1.12&partnerID=40&md5=03edcbcf3be282b12912f8d63a569adc		Article	Final	All Open Access, Green	Scopus	2-s2.0-84958182513
26656780	Hlf is a genetic modifier of epilepsy caused by voltage-gated sodium channel mutations	2016	Hawkins N.A., Kearney J.A.	Epilepsy Research	119			20	23		23	10.1016/j.eplepsyres.2015.11.016	https://www.scopus.com/inward/record.uri?eid=2-s2.0-84955242276&doi=10.1016%2fj.eplepsyres.2015.11.016&partnerID=40&md5=e4b2fac50bf6f7e1f19fe9cbdf03fa04		Article	Final	All Open Access, Green	Scopus	2-s2.0-84955242276
26749013	Sudden unexpected death in epilepsy genetics: Molecular diagnostics and prevention	2016	Goldman A.M., Behr E.R., Semsarian C., Bagnall R.D., Sisodiya S., Cooper P.N.	Epilepsia	57			17	25		57	10.1111/epi.13232	https://www.scopus.com/inward/record.uri?eid=2-s2.0-84954148489&doi=10.1111%2fepi.13232&partnerID=40&md5=d41fd698a9591249e0ef4174deb87a91		Conference Paper	Final	All Open Access, Bronze, Green	Scopus	2-s2.0-84954148489
26648591	Unexplained early onset epileptic encephalopathy: Exome screening and phenotype expansion	2016	Allen N.M., Conroy J., Shahwan A., Lynch B., Correa R.G., Pena S.D.J., McCreary D., Magalhães T.R., Ennis S., Lynch S.A., King M.D.	Epilepsia	57	1		e12	e17		101	10.1111/epi.13250	https://www.scopus.com/inward/record.uri?eid=2-s2.0-84954078188&doi=10.1111%2fepi.13250&partnerID=40&md5=2ffc5ff2d1d5b9e9cebdb0b56a217848		Article	Final	All Open Access, Bronze	Scopus	2-s2.0-84954078188
26597089	The genetic landscape of the epileptic encephalopathies of infancy and childhood	2016	McTague A., Howell K.B., Cross J.H., Kurian M.A., Scheffer I.E.	The Lancet Neurology	15	3		304	316		279	10.1016/S1474-4422(15)00250-1	https://www.scopus.com/inward/record.uri?eid=2-s2.0-84948799490&doi=10.1016%2fS1474-4422%2815%2900250-1&partnerID=40&md5=15c3c62b35c906dae53f919f1f8b658c		Review	Final		Scopus	2-s2.0-84948799490
26410685	An Scn1a epilepsy mutation in Scn8a alters seizure susceptibility and behavior	2016	Makinson C.D., Dutt K., Lin F., Papale L.A., Shankar A., Barela A.J., Liu R., Goldin A.L., Escayg A.	Experimental Neurology	275			46	58		10	10.1016/j.expneurol.2015.09.008	https://www.scopus.com/inward/record.uri?eid=2-s2.0-84946600543&doi=10.1016%2fj.expneurol.2015.09.008&partnerID=40&md5=d6f543bd21cb74fa027e4084813ec5d9		Article	Final	All Open Access, Green	Scopus	2-s2.0-84946600543
26231830	Prioritizing the development of mouse models for childhood brain disorders	2016	Ogden K.K., Ozkan E.D., Rumbaugh G.	Neuropharmacology	100			2	16		14	10.1016/j.neuropharm.2015.07.029	https://www.scopus.com/inward/record.uri?eid=2-s2.0-84942365682&doi=10.1016%2fj.neuropharm.2015.07.029&partnerID=40&md5=90c4a1a7bf55a2e0fd061bfca37bc721		Review	Final	All Open Access, Green	Scopus	2-s2.0-84942365682
26183863	Efficacy of antiepileptic drugs for the treatment of Dravet syndrome with different genotypes	2016	Shi X.-Y., Tomonoh Y., Wang W.-Z., Ishii A., Higurashi N., Kurahashi H., Kaneko S., Hirose S., The Epilepsy Genetic Study Group, Japan (Chairperson, SK)	Brain and Development	38	1		40	46		31	10.1016/j.braindev.2015.06.008	https://www.scopus.com/inward/record.uri?eid=2-s2.0-84936972457&doi=10.1016%2fj.braindev.2015.06.008&partnerID=40&md5=939cf54d12fe0b5250b31c5a4cc4b522		Article	Final		Scopus	2-s2.0-84936972457
26637798	Targeted DNA Sequencing from Autism Spectrum Disorder Brains Implicates Multiple Genetic Mechanisms	2015	D'Gama A.M., Pochareddy S., Li M., Jamuar S.S., Reiff R.E., Lam A.-T.N., Sestan N., Walsh C.A.	Neuron	88	5		910	917		85	10.1016/j.neuron.2015.11.009	https://www.scopus.com/inward/record.uri?eid=2-s2.0-84949432392&doi=10.1016%2fj.neuron.2015.11.009&partnerID=40&md5=e320cc9fea03c38ad12f1578da7be3cc		Article	Final	All Open Access, Bronze, Green	Scopus	2-s2.0-84949432392
26339958	Clinical and histopathological outcomes in patients with SCN1A mutations undergoing surgery for epilepsy	2015	Skjei K.L., Church E.W., Harding B.N., Santi M., Holland-Bouley K.D., Clancy R.R., Porter B.E., Heuer G.G., Marsh E.D.	Journal of Neurosurgery: Pediatrics	16	6		668	674		24	10.3171/2015.5.PEDS14551	https://www.scopus.com/inward/record.uri?eid=2-s2.0-84971655055&doi=10.3171%2f2015.5.PEDS14551&partnerID=40&md5=96ba448dce8553da355d056f411b85d3		Article	Final	All Open Access, Bronze	Scopus	2-s2.0-84971655055
	Dravet syndrome [Síndrome de Dravet]	2015	Pérez A.B., Moreno N.	Salus	19	3		27	30				https://www.scopus.com/inward/record.uri?eid=2-s2.0-84958741640&partnerID=40&md5=7c0a8b3882bbffd07cb4b02c47badb9b		Article	Final		Scopus	2-s2.0-84958741640
	SCN1A and SCN1B gene polymorphisms and their association with plasma concentrations of carbamazepine and carbamazepine 10, 11 epoxide in iranian epileptic patients	2015	Namazi S., Azarpira N., Javidnia K., Emami M., Rahjoo R., Berahmand R., Borhani-Haghighi A.	Iranian Journal of Basic Medical Sciences	18	12		1215	1220		4		https://www.scopus.com/inward/record.uri?eid=2-s2.0-84953398792&partnerID=40&md5=e95acc22c3d8ec0fea29e836bc203200		Article	Final		Scopus	2-s2.0-84953398792
26614543	De novo SCN1A gene deletion in therapy-resistant Dravet syndrome [De novo SCN1A géndeletio terápiarezisztens Dravet-szindrómában]	2015	Bene J., Hadzsiev K., Komlósi K., Kövesdi E., Mátyás P., Melegh B.	Orvosi Hetilap	156	49		2009	2012		2	10.1556/650.2015.30308	https://www.scopus.com/inward/record.uri?eid=2-s2.0-84948686757&doi=10.1556%2f650.2015.30308&partnerID=40&md5=1b6df8f7233d0e10112e981366e89c27		Article	Final	All Open Access, Green	Scopus	2-s2.0-84948686757
26555147	Polymorphic variants of SCN1A and EPHX1 influence plasma carbamazepine concentration, metabolism and pharmacoresistance in a population of kosovar albanian epileptic patients	2015	Daci A., Beretta G., Vllasaliu D., Shala A., Govori V., Norata G.D., Krasniqi S.	PLoS ONE	10	11	142408				27	10.1371/journal.pone.0142408	https://www.scopus.com/inward/record.uri?eid=2-s2.0-84953268263&doi=10.1371%2fjournal.pone.0142408&partnerID=40&md5=6fa92e25df03e46cfcc9fab2b6906cdd		Article	Final	All Open Access, Gold, Green	Scopus	2-s2.0-84953268263
26544041	Gene mutation analysis in 253 Chinese children with unexplained epilepsy and intellectual/developmental disabilities	2015	Zhang Y., Kong W., Gao Y., Liu X., Gao K., Xie H., Wu Y., Zhang Y., Wang J., Gao F., Wu X., Jiang Y.	PLoS ONE	10	11	e0141782				48	10.1371/journal.pone.0141782	https://www.scopus.com/inward/record.uri?eid=2-s2.0-84952659670&doi=10.1371%2fjournal.pone.0141782&partnerID=40&md5=50ceaab61b6673a48fce627d5337f788		Article	Final	All Open Access, Gold, Green	Scopus	2-s2.0-84952659670
	Management of convulsive status epilepticus in children	2015	Ram D., Martland T.	Paediatrics and Child Health (United Kingdom)	25	11		522	527			10.1016/j.paed.2015.06.012	https://www.scopus.com/inward/record.uri?eid=2-s2.0-84955383626&doi=10.1016%2fj.paed.2015.06.012&partnerID=40&md5=cf90fbec2e5c79d95ff0cde85fa4eb2a		Review	Final		Scopus	2-s2.0-84955383626
26438699	Incidence of dravet syndrome in a US population	2015	Wu Y.W., Sullivan J., McDaniel S.S., Meisler M.H., Walsh E.M., Li S.X., Kuzniewicz M.W.	Pediatrics	136	5		e1310	e1315		102	10.1542/peds.2015-1807	https://www.scopus.com/inward/record.uri?eid=2-s2.0-84947253588&doi=10.1542%2fpeds.2015-1807&partnerID=40&md5=49afb45b32de6b7cef3e8a422b57bbbf		Article	Final	All Open Access, Bronze, Green	Scopus	2-s2.0-84947253588
26169758	Mitochondrial respiratory chain defects in skin fibroblasts from patients with Dravet syndrome	2015	Doccini S., Meschini M.C., Mei D., Guerrini R., Sicca F., Santorelli F.M.	Neurological Sciences	36	11		2151	2155		4	10.1007/s10072-015-2324-9	https://www.scopus.com/inward/record.uri?eid=2-s2.0-84945403664&doi=10.1007%2fs10072-015-2324-9&partnerID=40&md5=3ff868fb7b7aab8b3dc518b4e905dbb9		Letter	Final		Scopus	2-s2.0-84945403664
26484865	Determination of the optimal concentration of valproic acid in patients with epilepsy: A population pharmacokinetic-pharmacodynamic analysis	2015	Nakashima H., Oniki K., Nishimura M., Ogusu N., Shimomasuda M., Ono T., Matsuda K., Yasui-Furukori N., Nakagawa K., Ishitsu T., Saruwatari J.	PLoS ONE	10	10	e0141266				23	10.1371/journal.pone.0141266	https://www.scopus.com/inward/record.uri?eid=2-s2.0-84949008296&doi=10.1371%2fjournal.pone.0141266&partnerID=40&md5=7c25e7ca98ad635bd6b3b2ba71014164		Article	Final	All Open Access, Gold, Green	Scopus	2-s2.0-84949008296
26319172	Using Patient-Derived Induced Pluripotent Stem Cells to Model and Treat Epilepsies	2015	Du X., Parent J.M.	Current Neurology and Neuroscience Reports	15	10	71			9	23	10.1007/s11910-015-0588-3	https://www.scopus.com/inward/record.uri?eid=2-s2.0-84940646990&doi=10.1007%2fs11910-015-0588-3&partnerID=40&md5=0586705ee905fc9d218494ba539edb5c		Review	Final	All Open Access, Green	Scopus	2-s2.0-84940646990
26319171	Genetic Discoveries Drive Molecular Analyses and Targeted Therapeutic Options in the Epilepsies	2015	Dhindsa R.S., Goldstein D.B.	Current Neurology and Neuroscience Reports	15	10	70			8	9	10.1007/s11910-015-0587-4	https://www.scopus.com/inward/record.uri?eid=2-s2.0-84940639930&doi=10.1007%2fs11910-015-0587-4&partnerID=40&md5=94f390d4b4b0973712a1611464891996		Review	Final		Scopus	2-s2.0-84940639930
26293783	Seizing control of epileptic activity can improve outcome	2015	Chapman K.E., Specchio N., Shinnar S., Holmes G.L.	Epilepsia	56	10		1482	1485		18	10.1111/epi.13109	https://www.scopus.com/inward/record.uri?eid=2-s2.0-84943198293&doi=10.1111%2fepi.13109&partnerID=40&md5=be60fe4ec10d5017721407c33dda18a7		Review	Final	All Open Access, Bronze	Scopus	2-s2.0-84943198293
25843248	Three patients manifesting early infantile epileptic spasms associated with 2q24.3 microduplications	2015	Yoshitomi S., Takahashi Y., Ishizuka M., Yamaguchi T., Watanabe A., Nasu H., Ueda Y., Ohtani H., Ikeda H., Imai K., Shigematsu H., Inoue Y., Tanahashi Y., Aiba K., Ohta H., Shimada S., Yamamoto T.	Brain and Development	37	9		874	879		6	10.1016/j.braindev.2015.03.001	https://www.scopus.com/inward/record.uri?eid=2-s2.0-84940614004&doi=10.1016%2fj.braindev.2015.03.001&partnerID=40&md5=34624eda93eb82d7e18b4baaab4856ca		Article	Final		Scopus	2-s2.0-84940614004
	Cannabis and endocannabinoid signaling in Epilepsy	2015	Katona I.	Handbook of Experimental Pharmacology	231			285	316		45	10.1007/978-3-319-20825-1_10	https://www.scopus.com/inward/record.uri?eid=2-s2.0-84942512649&doi=10.1007%2f978-3-319-20825-1_10&partnerID=40&md5=c3b1fcc60a43ce87c260f9e708ee4e0b		Book Chapter	Final		Scopus	2-s2.0-84942512649
26371886	Molecular profiling of a rare rosette-forming glioneuronal tumor arising in the spinal cord	2015	Bidinotto L.T., Scapulatempo-Neto C., Mackay A., De Almeida G.C., Scheithauer B.W., Berardinelli G.N., Torrieri R., Clara C.A., Feltrin L.T., Viana-Pereira M., Varella-Garcia M., Jones C., Reis R.M.	PLoS ONE	10	9	e0137690				20	10.1371/journal.pone.0137690	https://www.scopus.com/inward/record.uri?eid=2-s2.0-84945546918&doi=10.1371%2fjournal.pone.0137690&partnerID=40&md5=c809d2aec00bf963b8a707f5facd1384		Article	Final	All Open Access, Gold, Green	Scopus	2-s2.0-84945546918
26096185	Amplicon Resequencing Identified Parental Mosaicism for Approximately 10% of "de novo" SCN1A Mutations in Children with Dravet Syndrome	2015	Xu X., Yang X., Wu Q., Liu A., Yang X., Ye A.Y., Huang A.Y., Li J., Wang M., Yu Z., Wang S., Zhang Z., Wu X., Wei L., Zhang Y.	Human Mutation	36	9		861	872		70	10.1002/humu.22819	https://www.scopus.com/inward/record.uri?eid=2-s2.0-84938962593&doi=10.1002%2fhumu.22819&partnerID=40&md5=1ee392f00083dfd591f7b7077fa0c8a1		Article	Final	All Open Access, Hybrid Gold, Green	Scopus	2-s2.0-84938962593
26259688	MicroRNA-9 induces defective trafficking of Nav1.1 and Nav1.2 by targeting Navβ2 protein coding region in rat with chronic brain hypoperfusion	2015	Sun L.-H., Yan M.-L., Hu X.-L., Peng L.-W., Che H., Bao Y.-N., Guo F., Liu T., Chen X., Zhang R., Ban T., Wang N., Liu H.-L., Hou X., Ai J.	Molecular Neurodegeneration	10	1	36				18	10.1186/s13024-015-0032-9	https://www.scopus.com/inward/record.uri?eid=2-s2.0-84938897329&doi=10.1186%2fs13024-015-0032-9&partnerID=40&md5=059599c3115b8fb53b2d29238d7276cd		Article	Final	All Open Access, Gold, Green	Scopus	2-s2.0-84938897329
26182346	Human Nav1.6 channels generate larger resurgent currents than human Nav1.1 channels, but the Navβ4 peptide does not protect either isoform from use-dependent reduction	2015	Patel R.R., Barbosa C., Xiao Y., Cummins T.R.	PLoS ONE	10	7	e0133485				13	10.1371/journal.pone.0133485	https://www.scopus.com/inward/record.uri?eid=2-s2.0-84941363840&doi=10.1371%2fjournal.pone.0133485&partnerID=40&md5=f04c2b8a72f4ea752d09575dadace7c3		Article	Final	All Open Access, Gold, Green	Scopus	2-s2.0-84941363840
26161490	Pediatric seizures and Vaccines	2015	Kerstenetzk L., Gidal B.	Journal of the American Pharmacists Association	55	4		457	460		2	10.1331/JAPhA.2015.15522	https://www.scopus.com/inward/record.uri?eid=2-s2.0-84936936303&doi=10.1331%2fJAPhA.2015.15522&partnerID=40&md5=2468a52404d2b3eb47cdeb7a1f023820		Article	Final		Scopus	2-s2.0-84936936303
25986186	A clinical variant in SCN1A inherited from a mosaic father cosegregates with a novel variant to cause Dravet syndrome in a consanguineous family	2015	Tuncer F.N., Gormez Z., Calik M., Altiokka Uzun G., Sagiroglu M.S., Yuceturk B., Yuksel B., Baykan B., Bebek N., Iscan A., Ugur Iseri S.A., Ozbek U.	Epilepsy Research	113			5	10		7	10.1016/j.eplepsyres.2015.02.020	https://www.scopus.com/inward/record.uri?eid=2-s2.0-84929417531&doi=10.1016%2fj.eplepsyres.2015.02.020&partnerID=40&md5=1ca60e619f3b9ebf7bb1e27150ae28ac		Article	Final		Scopus	2-s2.0-84929417531
25838126	Benchmarking the stability of human detergent-solubilised voltage-gated sodium channels for structural studies using eel as a reference	2015	Slowik D., Henderson R.	Biochimica et Biophysica Acta - Biomembranes	1848	7	81858	1545	1551		7	10.1016/j.bbamem.2015.03.021	https://www.scopus.com/inward/record.uri?eid=2-s2.0-84928027320&doi=10.1016%2fj.bbamem.2015.03.021&partnerID=40&md5=dac4dd3ffb6893d2034662b9ae06a87c		Article	Final	All Open Access, Hybrid Gold, Green	Scopus	2-s2.0-84928027320
	Erratum: Generation of the SCN1A epilepsy mutation in hiPS cells using the TALEN technique (Scientific Reports (2015) 4 (5404) DOI: 10.1038/srep05404)	2015	Chen W., Liu J., Zhang L., Xu H., Guo X., Deng S., Liu L., Yu D., Chen Y., Li Z.	Scientific Reports	5		11174					10.1038/srep11174	https://www.scopus.com/inward/record.uri?eid=2-s2.0-84934777312&doi=10.1038%2fsrep11174&partnerID=40&md5=e2d1825032ee6579a8c923e2623b9302		Erratum	Final	All Open Access, Gold, Green	Scopus	2-s2.0-84934777312
26060908	Genetic causes of generalized epilepsies	2015	Helbig I.	Seminars in Neurology	35	3		288	292		19	10.1055/s-0035-1552922	https://www.scopus.com/inward/record.uri?eid=2-s2.0-84930935093&doi=10.1055%2fs-0035-1552922&partnerID=40&md5=601d761b16c903bad00a7be4ab152248		Article	Final	All Open Access, Bronze	Scopus	2-s2.0-84930935093
	Epilepsy with auditory features A heterogeneous clinico-molecular disease	2015	Pippucci T., Licchetta L., Baldassari S., Palombo F., Menghi V., D'Aurizio R., Leta C., Stipa C., Boero G., D'Orsi G., Magi A., Scheffer I., Seri M., Tinuper P., Bisulli F.	Neurology: Genetics	1	1	e5				35	10.1212/NXG.0000000000000005	https://www.scopus.com/inward/record.uri?eid=2-s2.0-85046981886&doi=10.1212%2fNXG.0000000000000005&partnerID=40&md5=96d5960fd3e73a65d59019f406dc62c6		Article	Final	All Open Access, Gold, Green	Scopus	2-s2.0-85046981886
26189305	ABCB1, ABCC2, SCN1A, SCN2A, GABRA1 gene polymorphisms and drug resistant epilepsy in the Chinese Han population	2015	Zhou L., Cao Y., Long H., Long L., Xu L., Liu Z., Zhang Y., Xiao B.	Pharmazie	70	6		416	420		24	10.1691/ph.2015.4849	https://www.scopus.com/inward/record.uri?eid=2-s2.0-84940740175&doi=10.1691%2fph.2015.4849&partnerID=40&md5=d8ed0ad16787f00e94d8f75d8161a9f7		Article	Final		Scopus	2-s2.0-84940740175
	Severe myoclonic epilepsy of infancy: Seizure reduction during adjunctive eslicarbazepine in two cases	2015	Buoni S., Geronzi U., Orsi A., Hayek Y.	Epilepsy and Behavior Case Reports	4			38	40		2	10.1016/j.ebcr.2015.06.002	https://www.scopus.com/inward/record.uri?eid=2-s2.0-84934279181&doi=10.1016%2fj.ebcr.2015.06.002&partnerID=40&md5=4fe0c3f298f8385e6eedc28b4bf06f25		Article	Final	All Open Access, Gold, Green	Scopus	2-s2.0-84934279181
25917466	Febrile seizures and Genetic Epilepsy with Febrile Seizures plus (GEFS+)	2015	Camfield P., Camfield C.	Epileptic Disorders	17	2		124	133		41	10.1684/epd.2015.0737	https://www.scopus.com/inward/record.uri?eid=2-s2.0-84933506060&doi=10.1684%2fepd.2015.0737&partnerID=40&md5=c764fb996e7798f677ae8f6ef9d71c61		Article	Final		Scopus	2-s2.0-84933506060
25924876	Activity of drugs and components of natural origin in the severe myoclonic epilepsy of infancy (Dravet syndrome)	2015	Berio A., Piazzi A.	Central Nervous System Agents in Medicinal Chemistry	15	2		95	98		5	10.2174/1871524915666150430161321	https://www.scopus.com/inward/record.uri?eid=2-s2.0-84930704963&doi=10.2174%2f1871524915666150430161321&partnerID=40&md5=41cca9a940a887360706f8c30e2561dc		Article	Final		Scopus	2-s2.0-84930704963
	Mutation of the SCN1A gene – Genetic cause of epilepsy [Mutacija SCN1A gena – Genski uzrok epilepsije]	2015	Nišević J.R., Prpić I., Sasso A.	Medicina Fluminensis	51	2		261	266				https://www.scopus.com/inward/record.uri?eid=2-s2.0-84930385062&partnerID=40&md5=1b69fd1a7325d43e5a692ed02fe3982a		Review	Final		Scopus	2-s2.0-84930385062
26021464	Seizure precipitants in Dravet syndrome: What events and activities are specifically provocative compared with other epilepsies?	2015	Verbeek N.E., Wassenaar M., van Campen J.S., Sonsma A., Gunning B., Knoers N., Lindhout D., Jansen F.E., Leijten F., Brilstra E.H., Kasteleijn-Nolst Trenité D.	Epilepsy and Behavior	47			39	44		21	10.1016/j.yebeh.2015.05.008	https://www.scopus.com/inward/record.uri?eid=2-s2.0-84930194995&doi=10.1016%2fj.yebeh.2015.05.008&partnerID=40&md5=065ee59098fcf65685e5435eccc4b2b1		Article	Final		Scopus	2-s2.0-84930194995
25754450	The SCN1A Mutation Database: Updating Information and Analysis of the Relationships among Genotype, Functional Alteration, and Phenotype	2015	Meng H., Xu H.-Q., Yu L., Lin G.-W., He N., Su T., Shi Y.-W., Li B., Wang J., Liu X.-R., Tang B., Long Y.-S., Yi Y.-H., Liao W.-P.	Human Mutation	36	6		573	580		104	10.1002/humu.22782	https://www.scopus.com/inward/record.uri?eid=2-s2.0-84929502090&doi=10.1002%2fhumu.22782&partnerID=40&md5=c42791e7fd50ddb8627347686156e797		Article	Final		Scopus	2-s2.0-84929502090
24990319	Electrophysiological Differences between the Same Pore Region Mutation in SCN1A and SCN3A	2015	Chen Y.-J., Shi Y.-W., Xu H.-Q., Chen M.-L., Gao M.-M., Sun W.-W., Tang B., Zeng Y., Liao W.-P.	Molecular Neurobiology	51	3		1263	1270		19	10.1007/s12035-014-8802-x	https://www.scopus.com/inward/record.uri?eid=2-s2.0-84929333805&doi=10.1007%2fs12035-014-8802-x&partnerID=40&md5=21b5207c326f381cc3e1dd1b1c267232		Article	Final		Scopus	2-s2.0-84929333805
25459968	Electroencephalographic features of patients with SCN1A-positive dravet syndrome	2015	Lee H.-F., Chi C.-S., Tsai C.-R., Chen C.-H., Wang C.-C.	Brain and Development	37	6		599	611		15	10.1016/j.braindev.2014.10.003	https://www.scopus.com/inward/record.uri?eid=2-s2.0-84928272450&doi=10.1016%2fj.braindev.2014.10.003&partnerID=40&md5=85d390c3f60820731c67c262f2b385af		Article	Final		Scopus	2-s2.0-84928272450
25965391	Pharmacological characterization of an antisense knockdown zebrafish model of Dravet syndrome: Inhibition of epileptic seizures by the serotonin agonist fenfluramine	2015	Zhang Y., Kecskés A., Copmans D., Langlois M., Crawford A.D., Ceulemans B., Lagae L., De Witte P.A.M., Esguerra C.V.	PLoS ONE	10	5	125898				59	10.1371/journal.pone.0125898	https://www.scopus.com/inward/record.uri?eid=2-s2.0-84930641989&doi=10.1371%2fjournal.pone.0125898&partnerID=40&md5=fa0cc2e4d9fef81b1efc0ba428ec5c68		Article	Final	All Open Access, Gold, Green	Scopus	2-s2.0-84930641989
25951140	Analysis of mutations in 7 genes associated with neuronal excitability and synaptic transmission in a cohort of children with non-syndromic infantile epileptic encephalopathy	2015	Kwong A.K.-Y., Ho A.C.-C., Fung C.-W., Wong V.C.-N.	PLoS ONE	10	5	e0126446				19	10.1371/journal.pone.0126446	https://www.scopus.com/inward/record.uri?eid=2-s2.0-84929104082&doi=10.1371%2fjournal.pone.0126446&partnerID=40&md5=f3263874cacb70fa4e051ed4b8706c17		Article	Final	All Open Access, Gold, Green	Scopus	2-s2.0-84929104082
25818041	Diagnostic yield of genetic testing in epileptic encephalopathy in childhood	2015	Mercimek-Mahmutoglu S., Patel J., Cordeiro D., Hewson S., Callen D., Donner E.J., Hahn C.D., Kannu P., Kobayashi J., Minassian B.A., Moharir M., Siriwardena K., Weiss S.K., Weksberg R., Snead O.C.	Epilepsia	56	5		707	716		134	10.1111/epi.12954	https://www.scopus.com/inward/record.uri?eid=2-s2.0-84929510832&doi=10.1111%2fepi.12954&partnerID=40&md5=603f649c3d288458cf650e586e0ccb52		Article	Final	All Open Access, Bronze	Scopus	2-s2.0-84929510832
25885068	Maternal germinal mosaicism for SCN1A in sibs with a mild form of Dravet syndrome	2015	Guala A., Peruzzi C., Gennaro E., Pennese L., Danesino C.	American Journal of Medical Genetics, Part A	167	5		1165	1167		4	10.1002/ajmg.a.36990	https://www.scopus.com/inward/record.uri?eid=2-s2.0-84927762725&doi=10.1002%2fajmg.a.36990&partnerID=40&md5=15c61acdf3cc06a0d4390f0dda2f0f84		Letter	Final		Scopus	2-s2.0-84927762725
25156649	Clinical and genetic features of acute encephalopathy in children taking theophylline	2015	Saitoh M., Shinohara M., Ishii A., Ihara Y., Hirose S., Shiomi M., Kawawaki H., Kubota M., Yamagata T., Miyamoto A., Yamanaka G., Amemiya K., Kikuchi K., Kamei A., Akasaka M., Anzai Y., Mizuguchi M.	Brain and Development	37	5		463	470		15	10.1016/j.braindev.2014.07.010	https://www.scopus.com/inward/record.uri?eid=2-s2.0-84925248900&doi=10.1016%2fj.braindev.2014.07.010&partnerID=40&md5=03f368fc9307ef9ae27bfac88d8a739e		Article	Final		Scopus	2-s2.0-84925248900
25766678	Sleep impairment and reduced interneuron excitability in a mouse model of Dravet Syndrome	2015	Kalume F., Oakley J.C., Westenbroek R.E., Gile J., de la Iglesia H.O., Scheuer T., Catterall W.A.	Neurobiology of Disease	77			141	154		47	10.1016/j.nbd.2015.02.016	https://www.scopus.com/inward/record.uri?eid=2-s2.0-84925078527&doi=10.1016%2fj.nbd.2015.02.016&partnerID=40&md5=c86d4287a7ad16b1b5bc5edb016c86dc		Article	Final	All Open Access, Green	Scopus	2-s2.0-84925078527
25725421	Functional and structural deficits of the dentate gyrus network coincide with emerging spontaneous seizures in an Scn1a mutant dravet syndrome model during development	2015	Tsai M.-S., Lee M.-L., Chang C.-Y., Fan H.-H., Yu I.-S., Chen Y.-T., You J.-Y., Chen C.-Y., Chang F.-C., Hsiao J.H., Khorkova O., Liou H.-H., Yanagawa Y., Lee L.-J., Lin S.-W.	Neurobiology of Disease	77			35	48		26	10.1016/j.nbd.2015.02.010	https://www.scopus.com/inward/record.uri?eid=2-s2.0-84924129405&doi=10.1016%2fj.nbd.2015.02.010&partnerID=40&md5=e9de6f7aae55ee8be360c2fe63fcfdbf		Article	Final		Scopus	2-s2.0-84924129405
25855492	Spreading depolarization in the brainstem mediates sudden cardiorespiratory arrest in mouse SUDEP models	2015	Aiba I., Noebels J.L.	Science Translational Medicine	7	282	282ra46				151	10.1126/scitranslmed.aaa4050	https://www.scopus.com/inward/record.uri?eid=2-s2.0-84927622806&doi=10.1126%2fscitranslmed.aaa4050&partnerID=40&md5=ace121ab098bb298cc9b62ce0d455840		Article	Final	All Open Access, Bronze, Green	Scopus	2-s2.0-84927622806
25886476	Acute respiratory distress syndrome in a child with severe epileptic disorder treated successfully by extracorporeal membrane oxygenation: A case report	2015	Nosaka N., Ichiba S., Tsukahara K., Knaup E., Hayashi K., Kasahara S., Kobayashi Y., Oka M., Kobayashi K., Yoshinaga H., Ujike Y.	BMC Pediatrics	15	1	29				1	10.1186/s12887-015-0348-1	https://www.scopus.com/inward/record.uri?eid=2-s2.0-84928785007&doi=10.1186%2fs12887-015-0348-1&partnerID=40&md5=6b3c8c90f49888831f4391e97b137f62		Article	Final	All Open Access, Gold, Green	Scopus	2-s2.0-84928785007
25778844	The incidence of SCN1A-related Dravet syndrome in Denmark is 1:22,000: A population-based study from 2004 to 2009	2015	Bayat A., Hjalgrim H., Møller R.S.	Epilepsia	56	4		e36	e39		72	10.1111/epi.12927	https://www.scopus.com/inward/record.uri?eid=2-s2.0-84927517194&doi=10.1111%2fepi.12927&partnerID=40&md5=129f368371699f476d51c775029f01bf		Article	Final	All Open Access, Bronze	Scopus	2-s2.0-84927517194
25668517	RORA gene rs12912233 and rs880626 polymorphisms and their interaction with SCN1A rs3812718 in the risk of epilepsy: A case-control study in Malaysia	2015	Haerian B.S., Sha'ari H.M., Tan H.J., Fong C.Y., Wong S.W., Ong L.C., Raymond A.A., Tan C.T., Mohamed Z.	Genomics	105	4		229	236		6	10.1016/j.ygeno.2015.02.001	https://www.scopus.com/inward/record.uri?eid=2-s2.0-84924135981&doi=10.1016%2fj.ygeno.2015.02.001&partnerID=40&md5=209a1720cddfd76bfa515ee8940749d5		Article	Final	All Open Access, Bronze	Scopus	2-s2.0-84924135981
25823783	SCN1A, ABCC2 and UGT2B7 gene polymorphisms in association with individualized oxcarbazepine therapy	2015	Ma C.-L., Wu X.-Y., Jiao Z., Hong Z., Wu Z.-Y., Zhong M.-K.	Pharmacogenomics	16	4		347	360		26	10.2217/pgs.14.186	https://www.scopus.com/inward/record.uri?eid=2-s2.0-84964301737&doi=10.2217%2fpgs.14.186&partnerID=40&md5=014e27e094db798cca1d9443bbcfe446		Article	Final		Scopus	2-s2.0-84964301737
25800813	Ranking adverse drug reactions with crowdsourcing	2015	Gottlieb A., Hoehndorf R., Dumontier M., Altman R.B.	Journal of Medical Internet Research	17	3	e80				25	10.2196/jmir.3962	https://www.scopus.com/inward/record.uri?eid=2-s2.0-84929664404&doi=10.2196%2fjmir.3962&partnerID=40&md5=18139e29fc9849c0beb0980ccbaf0fae		Article	Final	All Open Access, Gold, Green	Scopus	2-s2.0-84929664404
25690317	Investigating the genetic basis of fever-associated syndromic epilepsies using copy number variation analysis	2015	Hartmann C., Von Spiczak S., Suls A., Weckhuysen S., Buyse G., Vilain C., Van Bogaert P., De Jonghe P., Cook J., Muhle H., Stephani U., Helbig I., Mefford H.C.	Epilepsia	56	3		e26	e32		15	10.1111/epi.12920	https://www.scopus.com/inward/record.uri?eid=2-s2.0-84924980404&doi=10.1111%2fepi.12920&partnerID=40&md5=a50da4ea35b127c1f3e005ce83ce71c4		Article	Final	All Open Access, Green	Scopus	2-s2.0-84924980404
25046982	Ictal ontogeny in Dravet syndrome	2015	Kim S.H., Nordli D.R., Berg A.T., Koh S., Laux L.	Clinical Neurophysiology	126	3		446	455		11	10.1016/j.clinph.2014.06.024	https://www.scopus.com/inward/record.uri?eid=2-s2.0-84922560290&doi=10.1016%2fj.clinph.2014.06.024&partnerID=40&md5=867a82ccc4f3e68fef6479fd053c6622		Article	Final		Scopus	2-s2.0-84922560290
25666511	The European patient with Dravet syndrome: Results from a parent-reported survey on antiepileptic drug use in the European population with Dravet syndrome	2015	Aras L.M., Isla J., Mingorance-Le Meur A.	Epilepsy and Behavior	44			104	109		52	10.1016/j.yebeh.2014.12.028	https://www.scopus.com/inward/record.uri?eid=2-s2.0-84922379236&doi=10.1016%2fj.yebeh.2014.12.028&partnerID=40&md5=61eca9b856459577e5871a1291c31913		Article	Final	All Open Access, Hybrid Gold	Scopus	2-s2.0-84922379236
25576396	Rescuable folding defective NaV1.1 (SCN1A) mutants in epilepsy: Properties, occurrence, and novel rescuing strategy with peptides targeted to the endoplasmic reticulum	2015	Bechi G., Rusconi R., Cestèle S., Striano P., Franceschetti S., Mantegazza M.	Neurobiology of Disease	75			100	114		34	10.1016/j.nbd.2014.12.028	https://www.scopus.com/inward/record.uri?eid=2-s2.0-84921457359&doi=10.1016%2fj.nbd.2014.12.028&partnerID=40&md5=04345dbe9c45ebe52ea9456e8a0a4d89		Article	Final		Scopus	2-s2.0-84921457359
25510870	Lactational exposure to low levels of the six indicator non-dioxin-like polychlorinated biphenyls induces DNA damage and repression of neuronal activity, in juvenile male mice	2015	Elnar A.A., Desor F., Marin F., Soulimani R., Nemos C.	Toxicology	328			57	65		10	10.1016/j.tox.2014.12.011	https://www.scopus.com/inward/record.uri?eid=2-s2.0-84919904191&doi=10.1016%2fj.tox.2014.12.011&partnerID=40&md5=3492ffbea376fc6ae29251a251d84372		Article	Final		Scopus	2-s2.0-84919904191
25445412	NMR-based urinalysis for rapid diagnosis of β-ureidopropionase deficiency in a patient with Dravet syndrome	2015	Lam C.-W., Law C.-Y., Leung K.-F., Lai C.-K., Pak-lam Chen S., Chan B., Chan K.-Y., Yuen Y.-P., Mak C.M., Yan-wo Chan A.	Clinica Chimica Acta	440			201	204		2	10.1016/j.cca.2014.10.030	https://www.scopus.com/inward/record.uri?eid=2-s2.0-84916894944&doi=10.1016%2fj.cca.2014.10.030&partnerID=40&md5=99d43c53e6c599417909419524ba68cd		Article	Final		Scopus	2-s2.0-84916894944
25338670	Personalized medicine approaches in epilepsy	2015	Walker L.E., Mirza N., Yip V.L.M., Marson A.G., Pirmohamed M.	Journal of Internal Medicine	277	2		218	234		34	10.1111/joim.12322	https://www.scopus.com/inward/record.uri?eid=2-s2.0-84921509063&doi=10.1111%2fjoim.12322&partnerID=40&md5=b5f798226775f54063f451f256bcf322		Article	Final	All Open Access, Bronze	Scopus	2-s2.0-84921509063
25204757	Epilepsy and mental retardation restricted to females: X-linked epileptic infantile encephalopathy of unusual inheritance	2015	Duszyc K., Terczynska I., Hoffman-Zacharska D.	Journal of Applied Genetics	56	1		49	56		22	10.1007/s13353-014-0243-8	https://www.scopus.com/inward/record.uri?eid=2-s2.0-84921027295&doi=10.1007%2fs13353-014-0243-8&partnerID=40&md5=d368a31a8720019c36d8c160254732d3		Review	Final		Scopus	2-s2.0-84921027295
25569746	A novel inherited SCN1A mutation associated with different neuropsychological phenotypes: Is there a common core deficit?	2015	Passamonti C., Petrelli C., Mei D., Foschi N., Guerrini R., Provinciali L., Zamponi N.	Epilepsy and Behavior	43			89	92		15	10.1016/j.yebeh.2014.11.009	https://www.scopus.com/inward/record.uri?eid=2-s2.0-84920613670&doi=10.1016%2fj.yebeh.2014.11.009&partnerID=40&md5=5cfb203d9e2b8627760fcdba3eeda4e2		Article	Final		Scopus	2-s2.0-84920613670
25453779	De novo expression of Nav1.7 in injured putative proprioceptive afferents: Multiple tetrodotoxin-sensitive sodium channels are retained in the rat dorsal root after spinal nerve ligation	2015	Fukuoka T., Miyoshi K., Noguchi K.	Neuroscience	284			693	706		12	10.1016/j.neuroscience.2014.10.027	https://www.scopus.com/inward/record.uri?eid=2-s2.0-84910680749&doi=10.1016%2fj.neuroscience.2014.10.027&partnerID=40&md5=7c7fa6a9c9b9dfe68f3dcd4d86abad4a		Article	Final		Scopus	2-s2.0-84910680749
	Large-scale phenotype-based antiepileptic drug screening in a zebrafish model of Dravet syndrome	2015	Dinday M.T., Baraban S.C.	eNeuro	2	4	e0068-15.2015			19	68	10.1523/ENEURO.0068-15.2015	https://www.scopus.com/inward/record.uri?eid=2-s2.0-85040979614&doi=10.1523%2fENEURO.0068-15.2015&partnerID=40&md5=5d8b170d9528635eafadeced3e4df44d		Article	Final	All Open Access, Gold, Green	Scopus	2-s2.0-85040979614
26232052	Myoclonus in childhood-onset neurogenetic disorders: The importance of early identification and treatment	2015	Van Egmond M.E., Elting J.W.J., Kuiper A., Zutt R., Heineman K.R., Brouwer O.F., Sival D.A., Willemsen M.A., Tijssen M.A.J., De Koning T.J.	European Journal of Paediatric Neurology	19	6		726	729		15	10.1016/j.ejpn.2015.07.003	https://www.scopus.com/inward/record.uri?eid=2-s2.0-84952862090&doi=10.1016%2fj.ejpn.2015.07.003&partnerID=40&md5=8381a5fba66ad669b768bf49c6398488		Article	Final		Scopus	2-s2.0-84952862090
26252084	Analysis of parental origin of de novo SCN1A mutations in Dravet syndrome	2015	Sun H., Zhang Y., Xu X., Liu X., Wu X.	Chinese Journal of Medical Genetics	32	4		457	461			10.3760/cma.j.issn.1003-9406.2015.04.001	https://www.scopus.com/inward/record.uri?eid=2-s2.0-84946566512&doi=10.3760%2fcma.j.issn.1003-9406.2015.04.001&partnerID=40&md5=003b80b8cf5bcbfff9b25f3afe91b3cf		Article	Final		Scopus	2-s2.0-84946566512
26311622	Missense mutations in sodium channel SCN1A and SCN2A predispose children to encephalopathy with severe febrile seizures	2015	Saitoh M., Ishii A., Ihara Y., Hoshino A., Terashima H., Kubota M., Kikuchi K., Yamanaka G., Amemiya K., Hirose S., Mizuguchi M.	Epilepsy Research	117			1	6		21	10.1016/j.eplepsyres.2015.08.001	https://www.scopus.com/inward/record.uri?eid=2-s2.0-84946197155&doi=10.1016%2fj.eplepsyres.2015.08.001&partnerID=40&md5=493520b0ad70f667e037c0770892f7d7		Article	Final		Scopus	2-s2.0-84946197155
	Low-dose fenfluramine in the treatment of neurologic disorders: Experience in Dravet syndrome	2015	Schoonjans A.S., Lagae L., Ceulemans B.	Therapeutic Advances in Neurological Disorders	8	6		328	338		45	10.1177/1756285615607726	https://www.scopus.com/inward/record.uri?eid=2-s2.0-84945581601&doi=10.1177%2f1756285615607726&partnerID=40&md5=0850eaf882ce4ff057627914186cbb17		Review	Final	All Open Access, Bronze, Green	Scopus	2-s2.0-84945581601
	Definite sudep in dravet syndrome: An adult case report [Dravet sendromunda kesin sudep: Erişkin bir olgu sunumu]	2015	Dede H.Ö., Gelİşİn Ö., Baykan B., Çağlayan H., Topaloğlu P., Gürses C., Bebek N., Gökyİğİt A.	Journal of Neurological Sciences	32	3		610	616		2		https://www.scopus.com/inward/record.uri?eid=2-s2.0-84944205353&partnerID=40&md5=ef267445a54fa22d8fa34f9d62b68b47		Article	Final		Scopus	2-s2.0-84944205353
	Meta-analysis revives genome-wide association studies in epilepsy	2015	Poduri A.	Epilepsy Currents	15	3		122	123		4	10.5698/1535-7597-15.3.122	https://www.scopus.com/inward/record.uri?eid=2-s2.0-84942920422&doi=10.5698%2f1535-7597-15.3.122&partnerID=40&md5=3fd9711677c644e23471cbfcf8fd80a2		Note	Final	All Open Access, Green	Scopus	2-s2.0-84942920422
	Genetics of epilepsy in clinical practice	2015	Berkovic S.F.	Epilepsy Currents	15	4		192	196		23	10.5698/1535-7511-15.4.192	https://www.scopus.com/inward/record.uri?eid=2-s2.0-84942867290&doi=10.5698%2f1535-7511-15.4.192&partnerID=40&md5=42e59fe2118a36fb35b13b50c19237b0		Review	Final	All Open Access, Bronze, Green	Scopus	2-s2.0-84942867290
26314341	Association between PK/PD-involved gene polymorphisms and carbamazepine-individualized therapy	2015	Ma C.-L., Jiao Z., Wu X.-Y., Hong Z., Wu Z.-Y., Zhong M.-K.	Pharmacogenomics	16	13		1499	1512		14	10.2217/pgs.15.94	https://www.scopus.com/inward/record.uri?eid=2-s2.0-84941627211&doi=10.2217%2fpgs.15.94&partnerID=40&md5=1263ac277d05c02872b2dbe94391a88c		Article	Final		Scopus	2-s2.0-84941627211
26362388	Familial temporal lobe epilepsy due to focal cortical dysplasia type IIIa	2015	Fabera P., Krijtova H., Tomasek M., Krysl D., Zamecnik J., Mohapl M., Jiruska P., Marusic P.	Seizure	31			120	123		4	10.1016/j.seizure.2015.07.014	https://www.scopus.com/inward/record.uri?eid=2-s2.0-84941137030&doi=10.1016%2fj.seizure.2015.07.014&partnerID=40&md5=e6a03271fc43f5ca5ff4cb126b748966		Article	Final	All Open Access, Bronze	Scopus	2-s2.0-84941137030
26354167	The ketogenic diet in infants - Advantages of early use	2015	Dressler A., Trimmel-Schwahofer P., Reithofer E., Gröppel G., Mühlebner A., Samueli S., Grabner V., Abraham K., Benninger F., Feucht M.	Epilepsy Research	116			53	58		43	10.1016/j.eplepsyres.2015.06.015	https://www.scopus.com/inward/record.uri?eid=2-s2.0-84940564032&doi=10.1016%2fj.eplepsyres.2015.06.015&partnerID=40&md5=df9b8d21d92f342ffcb36397fe140901		Article	Final		Scopus	2-s2.0-84940564032
26188943	From focal epilepsy to dravet syndrome –heterogeneity of the phenotype due to SCN1A mutations of the p.Arg1596 amino acid residue in the nav1.1 subunit	2015	Hoffman-Zacharska D., Szczepanik E., Terczynska I., Goszczanska-Ciuchta A., Zalewska-Miszkurka Z., Tataj R., Bal J.	Neurologia i Neurochirurgia Polska	49	4		258	266		7	10.1016/j.pjnns.2015.06.006	https://www.scopus.com/inward/record.uri?eid=2-s2.0-84940104007&doi=10.1016%2fj.pjnns.2015.06.006&partnerID=40&md5=2bd471a7acd65d9d17463e58ad794b09		Article	Final		Scopus	2-s2.0-84940104007
26203087	Effect of vaccinations on seizure risk and disease course in Dravet syndrome	2015	Verbeek N.E., Van Der Maas N.A.T., Sonsma A.C.M., Ippel E., Vermeer-De Bondt P.E., Hagebeuk E., Jansen F.E., Geesink H.H., Braun K.P., De Louw A., Augustijn P.B., Neuteboom R.F., Schieving J.H., Stroink H., Vermeulen R.J., Nicolai J., Brouwer O.F., Van Kempen M., De Kovel C.G.F., Kemmeren J.M., Koeleman B.P.C., Knoers N.V., Lindhout D., Gunning W.B., Brilstra E.H.	Neurology	85	7		596	603		18	10.1212/WNL.0000000000001855	https://www.scopus.com/inward/record.uri?eid=2-s2.0-84939512679&doi=10.1212%2fWNL.0000000000001855&partnerID=40&md5=5977e1ac6a525d9d22aa4d800cddc2aa		Article	Final		Scopus	2-s2.0-84939512679
25795284	Homozygous mutations in the SCN1A gene associated with genetic epilepsy with febrile seizures plus and Dravet syndrome in 2 families	2015	Brunklaus A., Ellis R., Stewart H., Aylett S., Reavey E., Jefferson R., Jain R., Chakraborty S., Jayawant S., Zuberi S.M.	European Journal of Paediatric Neurology	19	4		484	488		11	10.1016/j.ejpn.2015.02.001	https://www.scopus.com/inward/record.uri?eid=2-s2.0-84931572849&doi=10.1016%2fj.ejpn.2015.02.001&partnerID=40&md5=7c4ffd85262491ad92b71f1fcd392f6a		Article	Final		Scopus	2-s2.0-84931572849
26076853	Carbamazepine and oxcarbazepine in adult patients with Dravet syndrome: Friend or foe?	2015	Snoeijen-Schouwenaars F.M., Veendrick M.J.B.M., Van Mierlo P., Van Erp G., De Louw A.J.A., Kleine B.U., Schelhaas H.J., Tan I.Y.	Seizure	29			114	118		10	10.1016/j.seizure.2015.03.010	https://www.scopus.com/inward/record.uri?eid=2-s2.0-84930986124&doi=10.1016%2fj.seizure.2015.03.010&partnerID=40&md5=c25f72a8cc56fb17fc1ed1f651f8235a		Article	Final	All Open Access, Bronze	Scopus	2-s2.0-84930986124
	Dravet syndrome in Sweden: A population-based study	2015	Rosander C., Hallböök T.	Developmental Medicine and Child Neurology	57	7		628	633		39	10.1111/dmcn.12709	https://www.scopus.com/inward/record.uri?eid=2-s2.0-84930767106&doi=10.1111%2fdmcn.12709&partnerID=40&md5=4c6ccf0989278cacc81a141a2a178ab7		Article	Final	All Open Access, Bronze	Scopus	2-s2.0-84930767106
25996134	The Stroke-Migraine Depolarization Continuum	2015	Dreier J.P., Reiffurth C.	Neuron	86	4		902	922		175	10.1016/j.neuron.2015.04.004	https://www.scopus.com/inward/record.uri?eid=2-s2.0-84930267757&doi=10.1016%2fj.neuron.2015.04.004&partnerID=40&md5=f8b185643119f03bc751498ce4cfcdfe		Review	Final	All Open Access, Bronze	Scopus	2-s2.0-84930267757
25926453	Intracellular FGF14 (iFGF14) is required for spontaneous and evoked firing in cerebellar Purkinje neurons and for motor coordination and balance	2015	Bosch M.K., Carrasquillo Y., Ransdell J.L., Kanakamedala A., Ornitz D.M., Nerbonne J.M.	Journal of Neuroscience	35	17		6752	6769		36	10.1523/JNEUROSCI.2663-14.2015	https://www.scopus.com/inward/record.uri?eid=2-s2.0-84929359718&doi=10.1523%2fJNEUROSCI.2663-14.2015&partnerID=40&md5=3bd5abba187cd64e4de182abf97d7796		Article	Final	All Open Access, Bronze, Green	Scopus	2-s2.0-84929359718
25710692	Neuronal communication and synaptic metabolism in childhood epilepsy [Comunicación neuronal y metabolismo sináptico en epilepsia infantil]	2015	García-Cazorla À., Cortès-Saladelafont E., Duarte S.	Revista de Neurologia	60	5		219	228			10.33588/rn.6005.2014323	https://www.scopus.com/inward/record.uri?eid=2-s2.0-84924352752&doi=10.33588%2frn.6005.2014323&partnerID=40&md5=de6742f7a3ca38ee6f81e637cf12647f		Article	Final		Scopus	2-s2.0-84924352752
25524840	Epilepsy phenotype associated with a chromosome 2q24.3 deletion involving SCN1A: Migrating partial seizures of infancy or atypical dravet syndrome?	2015	Lim B.C., Hwang H., Kim H., Chae J.-H., Choi J., Kim K.J., Hwang Y.S., Yum M.-S., Ko T.-S.	Epilepsy Research	109	1		34	39		15	10.1016/j.eplepsyres.2014.10.008	https://www.scopus.com/inward/record.uri?eid=2-s2.0-84922623634&doi=10.1016%2fj.eplepsyres.2014.10.008&partnerID=40&md5=c4877b2fb2269d5ab0f889089c1a7e87		Article	Final		Scopus	2-s2.0-84922623634
25312505	Advances on genetic rat models of epilepsy	2015	Serikawa T., Mashimo T., Kuramoto T., Voigt B., Ohno Y., Sasa M.	Experimental Animals	64	1		1	17		19	10.1538/expanim.14-0066	https://www.scopus.com/inward/record.uri?eid=2-s2.0-84922250148&doi=10.1538%2fexpanim.14-0066&partnerID=40&md5=4052aa9971123e882b8afc7d035ffa85		Review	Final	All Open Access, Bronze, Green	Scopus	2-s2.0-84922250148
25590135	Evaluation of the effect of c.2946 + 1G > T mutation on splicing in the SCN1A gene	2015	Ben Mahmoud A., Ben Mansour R., Driss F., Baklouti-Gargouri S., Siala O., Mkaouar-Rebai E., Fakhfakh F.	Computational Biology and Chemistry	54			44	48			10.1016/j.compbiolchem.2015.01.003	https://www.scopus.com/inward/record.uri?eid=2-s2.0-84920973703&doi=10.1016%2fj.compbiolchem.2015.01.003&partnerID=40&md5=a6af7cc6b7472b0c087960cf5220f368		Article	Final		Scopus	2-s2.0-84920973703
25281316	Genetic background modulates impaired excitability of inhibitory neurons in a mouse model of Dravet syndrome	2015	Rubinstein M., Westenbroek R.E., Yu F.H., Jones C.J., Scheuer T., Catterall W.A.	Neurobiology of Disease	73			106	117		47	10.1016/j.nbd.2014.09.017	https://www.scopus.com/inward/record.uri?eid=2-s2.0-84908544395&doi=10.1016%2fj.nbd.2014.09.017&partnerID=40&md5=cf4e1665b16a92bd4ac4ac4eb7c54cb2		Article	Final	All Open Access, Green	Scopus	2-s2.0-84908544395
25344690	Common variants associated with general and MMR vaccine-related febrile seizures	2014	Feenstra B., Pasternak B., Geller F., Carstensen L., Wang T., Huang F., Eitson J.L., Hollegaard M.V., Svanström H., Vestergaard M., Hougaard D.M., Schoggins J.W., Jan L.Y., Melbye M., Hviid A.	Nature Genetics	46	12		1274	1282		91	10.1038/ng.3129	https://www.scopus.com/inward/record.uri?eid=2-s2.0-84922551032&doi=10.1038%2fng.3129&partnerID=40&md5=461f548fc3cb1cd9ed821b612871a782		Article	Final	All Open Access, Green	Scopus	2-s2.0-84922551032
25362483	Mutations in STX1B, encoding a presynaptic protein, cause fever-associated epilepsy syndromes	2014	Schubert J., Siekierska A., Langlois M., May P., Huneau C., Becker F., Muhle H., Suls A., Lemke J.R., De Kovel C.G.F., Thiele H., Konrad K., Kawalia A., Toliat M.R., Sander T., Rüschendorf F., Caliebe A., Nagel I., Kohl B., Kecskés A., Jacmin M., Hardies K., Weckhuysen S., Riesch E., Dorn T., Brilstra E.H., Baulac S., Møller R.S., Hjalgrim H., Koeleman B.P.C., Jurkat-Rott K., Lehman-Horn F., Roac…	Nature Genetics	46	12		1327	1332		122	10.1038/ng.3130	https://www.scopus.com/inward/record.uri?eid=2-s2.0-84911948736&doi=10.1038%2fng.3130&partnerID=40&md5=55ddc1ee5820b755d9b4074dcce8183a		Article	Final		Scopus	2-s2.0-84911948736
25525853	Upregulated genes at 2q24 gains as candidate oncogenes in hepatoblastomas	2014	Rodrigues T.C., Fidalgo F., Da Costa C.M.L., Ferreira E.N., Da Cunha I.W., Carraro D.M., Krepischi A.C.V., Rosenberg C.	Future Oncology	10	15		2449	2457		13	10.2217/fon.14.149	https://www.scopus.com/inward/record.uri?eid=2-s2.0-84920013099&doi=10.2217%2ffon.14.149&partnerID=40&md5=9a2b425c0ed1761fef7da4b771133b3a		Article	Final		Scopus	2-s2.0-84920013099
	Heating up: The genetics of febrile seizures	2014	Mefford H.C.	Science Translational Medicine	6	263	263ec200				1	10.1126/scitranslmed.aaa2063	https://www.scopus.com/inward/record.uri?eid=2-s2.0-84911912365&doi=10.1126%2fscitranslmed.aaa2063&partnerID=40&md5=fa3ac7f7f71a016f2e3b9a53c9935a17		Note	Final		Scopus	2-s2.0-84911912365
24707016	Two novel SCN1A mutations identified in families with familial hemiplegic migraine	2014	Weller C.M., Pelzer N., De Vries B., López M.A., De Fàbregues O., Pascual J., Arroyo M.A.R., Koelewijn S.C., Stam A.H., Haan J., Ferrari M.D., Terwindt G.M., Van Den Maagdenberg A.M.J.M.	Cephalalgia	34	13		1062	1069		23	10.1177/0333102414529195	https://www.scopus.com/inward/record.uri?eid=2-s2.0-84909633098&doi=10.1177%2f0333102414529195&partnerID=40&md5=efd5aa41ce10c07976356b6ebb5ee806		Article	Final		Scopus	2-s2.0-84909633098
25312340	Postzygotic single-nucleotide mosaicisms in whole-genome sequences of clinically unremarkable individuals	2014	Huang A.Y., Xu X., Ye A.Y., Wu Q., Yan L., Zhao B., Yang X., He Y., Wang S., Zhang Z., Gu B., Zhao H.-Q., Wang M., Gao H., Gao G., Zhang Z., Yang X., Wu X., Zhang Y., Wei L.	Cell Research	24	11		1311	1327		34	10.1038/cr.2014.131	https://www.scopus.com/inward/record.uri?eid=2-s2.0-84908552190&doi=10.1038%2fcr.2014.131&partnerID=40&md5=d9cdc0a68d8bba5c63bbfbc25fa4d4d5		Article	Final	All Open Access, Hybrid Gold, Green	Scopus	2-s2.0-84908552190
25378155	Impaired action potential initiation in GABAergic interneurons causes hyperexcitable networks in an epileptic mouse model carrying a human Nav1.1 mutation	2014	Hedrich U.B.S., Liautard C., Kirschenbaum D., Pofahl M., Lavigne J., Liu Y., Theiss S., Slotta J., Escayg A., Dihné M., Beck H., Mantegazza M., Lerche H.	Journal of Neuroscience	34	45		14874	14889		74	10.1523/JNEUROSCI.0721-14.2014	https://www.scopus.com/inward/record.uri?eid=2-s2.0-84908537805&doi=10.1523%2fJNEUROSCI.0721-14.2014&partnerID=40&md5=30e6cc53cdf9ed26c5b5ebb160815d5c		Article	Final	All Open Access, Bronze, Green	Scopus	2-s2.0-84908537805
24646837	Familial hemiplegic migraine due to L263V SCN1A mutation: Discordance for epilepsy between two kindreds from Douro Valley	2014	Barros J., Ferreira A., Brandão A.F., Lemos C., Correia F., Damásio J., Tuna A., Sequeiros J., Coutinho P., Alonso I., Pereira-Monteiro J.	Cephalalgia	34	12		1015	1020		10	10.1177/0333102414527015	https://www.scopus.com/inward/record.uri?eid=2-s2.0-84908158692&doi=10.1177%2f0333102414527015&partnerID=40&md5=7e5f00d4e0abaca6053fd5ac6004e7eb		Article	Final		Scopus	2-s2.0-84908158692
24436055	Transcription of the Human Sodium Channel SCN1A Gene Is Repressed by a Scaffolding Protein RACK1	2014	Dong Z.-F., Tang L.-J., Deng G.-F., Zeng T., Liu S.-J., Wan R.-P., Liu T., Zhao Q.-H., Yi Y.-H., Liao W.-P., Long Y.-S.	Molecular Neurobiology	50	2		438	448		13	10.1007/s12035-014-8633-9	https://www.scopus.com/inward/record.uri?eid=2-s2.0-84911005538&doi=10.1007%2fs12035-014-8633-9&partnerID=40&md5=9464151d203224fe9b72aa3ce78e23c3		Article	Final		Scopus	2-s2.0-84911005538
25874779	Genetic epilepsies with febrile seizures plus: clinical spectrum of Polish patients with SCN1A mutation - preliminary report	2014	Terczyńska I., Szczepanik E., Duszyc K., Górka P., Tataj R., Hoffman-Zacharska D.	Developmental period medicine	18	4		426	431				https://www.scopus.com/inward/record.uri?eid=2-s2.0-84929049373&partnerID=40&md5=0dcad83f753477338f6982837c58c783		Article	Final		Scopus	2-s2.0-84929049373
25154505	Methylphenidate improves learning impairments and hyperthermia-induced seizures caused by an Scn1a mutation	2014	Ohmori I., Kawakami N., Liu S., Wang H., Miyazaki I., Asanuma M., Michiue H., Matsui H., Mashimo T., Ouchida M.	Epilepsia	55	10		1558	1567		13	10.1111/epi.12750	https://www.scopus.com/inward/record.uri?eid=2-s2.0-84911462983&doi=10.1111%2fepi.12750&partnerID=40&md5=c62c23f13c0a545be9563cc64d32b294		Article	Final	All Open Access, Hybrid Gold, Green	Scopus	2-s2.0-84911462983
24996492	Clinical and genetic analysis in alternating hemiplegia of childhood: Ten new patients from Southern Europe	2014	Vila-Pueyo M., Pons R., Raspall-Chaure M., Marcé-Grau A., Carreño O., Sintas C., Cormand B., Pineda-Marfà M., Macaya A.	Journal of the Neurological Sciences	344	1月2日		37	42		17	10.1016/j.jns.2014.06.014	https://www.scopus.com/inward/record.uri?eid=2-s2.0-84906793980&doi=10.1016%2fj.jns.2014.06.014&partnerID=40&md5=832cf124cc60a7bda77445ca98e45b0f		Article	Final		Scopus	2-s2.0-84906793980
25042160	Tau reduction prevents disease in a mouse model of Dravet syndrome	2014	Gheyara A.L., Ponnusamy R., Djukic B., Craft R.J., Ho K., Guo W., Finucane M.M., Sanchez P.E., Mucke L.	Annals of Neurology	76	3		443	456		77	10.1002/ana.24230	https://www.scopus.com/inward/record.uri?eid=2-s2.0-84907876409&doi=10.1002%2fana.24230&partnerID=40&md5=428cc45e3d891c6a43b96dc4100c31d1		Article	Final	All Open Access, Hybrid Gold, Green	Scopus	2-s2.0-84907876409
24805083	Knock-in model of Dravet syndrome reveals a constitutive and conditional reduction in sodium current	2014	Schutte R.J., Schutte S.S., Algara J., Barragan E.V., Gilligan J., Staber C., Savva Y.A., Smith M.A., Reenan R., O'Dowd D.K.	Journal of Neurophysiology	112	4		903	912		30	10.1152/jn.00135.2014	https://www.scopus.com/inward/record.uri?eid=2-s2.0-84906074544&doi=10.1152%2fjn.00135.2014&partnerID=40&md5=dcd039f8514e215d3b3d0ddda8905fcb		Article	Final	All Open Access, Green	Scopus	2-s2.0-84906074544
	Efficacy of anti-epileptic drugs in patients with epilepsy with febrile seizures plus and the relation with voltage-gated sodium channel al-subunit gene mutations	2014	Yu L., He N., Liu X., Li B., Xu H., Shi Y., Gao M., Yi Y., Liao W.	Chinese Journal of Neurology	47	8		516	522			10.3760/cma.j.issn.1006-7876.2014.08.002	https://www.scopus.com/inward/record.uri?eid=2-s2.0-84906810145&doi=10.3760%2fcma.j.issn.1006-7876.2014.08.002&partnerID=40&md5=051ca46ea12212a18ccff788478c786a		Article	Final		Scopus	2-s2.0-84906810145
24953032	Generation of the SCN1A epilepsy mutation in hiPS cells using the TALEN technique	2014	Chen W., Liu J., Zhang L., Xu H., Guo X., Deng S., Liu L., Yu D., Chen Y., Li Z.	Scientific Reports	4		5404				16	10.1038/srep05404	https://www.scopus.com/inward/record.uri?eid=2-s2.0-84903171249&doi=10.1038%2fsrep05404&partnerID=40&md5=2ac98f238798082218d59aac2d7b4bc7		Article	Final	All Open Access, Gold, Green	Scopus	2-s2.0-84903171249
25219203	[Src family kinases affect the expression of Nav1.1 in spiral ganglion neurons]	2014	Zeng Q., Chen H., Su J.	Lin chuang er bi yan hou tou jing wai ke za zhi = Journal of clinical otorhinolaryngology, head, and neck surgery	28	11		789	792				https://www.scopus.com/inward/record.uri?eid=2-s2.0-84922330382&partnerID=40&md5=97efdc850abfebb3066ea7f7d7efdc5b		Article	Final		Scopus	2-s2.0-84922330382
24434335	Strain- and age-dependent hippocampal neuron sodium currents correlate with epilepsy severity in Dravet syndrome mice	2014	Mistry A.M., Thompson C.H., Miller A.R., Vanoye C.G., George Jr. A.L., Kearney J.A.	Neurobiology of Disease	65			1	11		91	10.1016/j.nbd.2014.01.006	https://www.scopus.com/inward/record.uri?eid=2-s2.0-84893470069&doi=10.1016%2fj.nbd.2014.01.006&partnerID=40&md5=09632c7af8ba2263d1c61f644bf65072		Article	Final	All Open Access, Green	Scopus	2-s2.0-84893470069
24623842	GABRA1 and STXBP1: Novel genetic causes of Dravet syndrome	2014	Carvill G.L., Weckhuysen S., McMahon J.M., Hartmann C., Møller R.S., Hjalgrim H., Cook J., Geraghty E., O'Roak B.J., Petrou S., Clarke A., Gill D., Sadleir L.G., Muhle H., Von Spiczak S., Nikanorova M., Hodgson B.L., Gazina E.V., Suls A., Shendure J., Dibbens L.M., De Jonghe P., Helbig I., Berkovic S.F., Scheffer I.E., Mefford H.C.	Neurology	82	14		1245	1253		165	10.1212/WNL.0000000000000291	https://www.scopus.com/inward/record.uri?eid=2-s2.0-84902171183&doi=10.1212%2fWNL.0000000000000291&partnerID=40&md5=d186470b3476e5e116f766d110ea1052		Article	Final	All Open Access, Green	Scopus	2-s2.0-84902171183
24623837	Comment: Dravet syndrome-"Old gene," novel mechanism	2014	Xu M.	Neurology	82	14		1250				10.1212/WNL.0000000000000300	https://www.scopus.com/inward/record.uri?eid=2-s2.0-84902166086&doi=10.1212%2fWNL.0000000000000300&partnerID=40&md5=4ee2af34362e2d16d95787d80d749747		Note	Final		Scopus	2-s2.0-84902166086
24419271	Neurobiology of autism gene products: Towards pathogenesis and drug targets	2014	Kleijer K.T.E., Schmeisser M.J., Krueger D.D., Boeckers T.M., Scheiffele P., Bourgeron T., Brose N., Burbach J.P.H.	Psychopharmacology	231	6		1037	1062		54	10.1007/s00213-013-3403-3	https://www.scopus.com/inward/record.uri?eid=2-s2.0-84896718770&doi=10.1007%2fs00213-013-3403-3&partnerID=40&md5=5fc09999c743e0a35bd565423a904183		Review	Final		Scopus	2-s2.0-84896718770
24439681	Therapeutic potential of NaV1.1 activators	2014	Jensen H.S., Grunnet M., Bastlund J.F.	Trends in Pharmacological Sciences	35	3		113	118		31	10.1016/j.tips.2013.12.007	https://www.scopus.com/inward/record.uri?eid=2-s2.0-84896715240&doi=10.1016%2fj.tips.2013.12.007&partnerID=40&md5=16c637770da9d2ead6b3bdaf0cc373c8		Review	Final		Scopus	2-s2.0-84896715240
24524648	The relationship between genes affecting the development of epilepsy and approaches to epilepsy therapy	2014	Ferraro T.N.	Expert Review of Neurotherapeutics	14	3		329	352		3	10.1586/14737175.2014.888651	https://www.scopus.com/inward/record.uri?eid=2-s2.0-84894185503&doi=10.1586%2f14737175.2014.888651&partnerID=40&md5=e99c2666e0947dccc67e38d2bd2af1ff		Review	Final		Scopus	2-s2.0-84894185503
24405698	Vaccination and occurrence of seizures in SCN1A mutation-positive patients: A multicenter Italian study	2014	Zamponi N., Passamonti C., Petrelli C., Veggiotti P., Baldassari C., Verrotti A., Capovilla G., Viri M., Coppola G., Vignoli A.	Pediatric Neurology	50	3		228	232		14	10.1016/j.pediatrneurol.2013.09.016	https://www.scopus.com/inward/record.uri?eid=2-s2.0-84894048186&doi=10.1016%2fj.pediatrneurol.2013.09.016&partnerID=40&md5=d9fd00cce0aed3db6fbe5d2701bf2c30		Article	Final		Scopus	2-s2.0-84894048186
24399675	Genetic background of febrile seizures	2014	Saghazadeh A., Mastrangelo M., Rezaei N.	Reviews in the Neurosciences	25	1		129	161		33	10.1515/revneuro-2013-0053	https://www.scopus.com/inward/record.uri?eid=2-s2.0-84896760665&doi=10.1515%2frevneuro-2013-0053&partnerID=40&md5=493b90e84562bc695e00d3f51b891b82		Article	Final		Scopus	2-s2.0-84896760665
24372310	High-resolution molecular genomic autopsy reveals complex sudden unexpected death in epilepsy risk profile	2014	Klassen T.L., Bomben V.C., Patel A., Drabek J., Chen T.T., Gu W., Zhang F., Chapman K., Lupski J.R., Noebels J.L., Goldman A.M.	Epilepsia	55	2		e6	e12		57	10.1111/epi.12489	https://www.scopus.com/inward/record.uri?eid=2-s2.0-84894096005&doi=10.1111%2fepi.12489&partnerID=40&md5=f7f5cf5d6460c3e643b5af1d8d9a2d5d		Article	Final	All Open Access, Bronze, Green	Scopus	2-s2.0-84894096005
24417577	Purinergic control of hippocampal circuit hyperexcitability in Dravet syndrome	2014	Gu F., Hazra A., Aulakh A., Žiburkus J.	Epilepsia	55	2		245	255		13	10.1111/epi.12487	https://www.scopus.com/inward/record.uri?eid=2-s2.0-84894054553&doi=10.1111%2fepi.12487&partnerID=40&md5=bec1de16542fe84509544fd691fd4db5		Article	Final	All Open Access, Bronze	Scopus	2-s2.0-84894054553
24417206	A common SCN1A splice-site polymorphism modifies the effect of carbamazepine on cortical excitability - A pharmacogenetic transcranial magnetic stimulation study	2014	Menzler K., Hermsen A., Balkenhol K., Duddek C., Bugiel H., Bauer S., Schorge S., Reif P.S., Klein K.M., Haag A., Oertel W.H., Hamer H.M., Knake S., Trucks H., Sander T., Rosenow F.	Epilepsia	55	2		362	369		22	10.1111/epi.12515	https://www.scopus.com/inward/record.uri?eid=2-s2.0-84894041702&doi=10.1111%2fepi.12515&partnerID=40&md5=02a6b9e3637b6a06d3fc68b8dcc63051		Article	Final		Scopus	2-s2.0-84894041702
24152123	Mapping genetic modifiers of survival in a mouse model of Dravet syndrome	2014	Miller A.R., Hawkins N.A., Mccollom C.E., Kearney J.A.	Genes, Brain and Behavior	13	2		163	172		67	10.1111/gbb.12099	https://www.scopus.com/inward/record.uri?eid=2-s2.0-84892997606&doi=10.1111%2fgbb.12099&partnerID=40&md5=f77030b11990883aac090057326628de		Article	Final	All Open Access, Green	Scopus	2-s2.0-84892997606
24357141	Effects of normal aging and SCN1A risk-gene expression on brain metabolites: Evidence for an association between SCN1A and myo-inositol	2014	Tunc-Skarka N., Meier S., Demirakca T., Sack M., Weber-Fahr W., Brusniak W., Wolf I., Matthäus F., Schulze T.G., Diener C., Ende G.	NMR in Biomedicine	27	2		228	234		4	10.1002/nbm.3057	https://www.scopus.com/inward/record.uri?eid=2-s2.0-84892850124&doi=10.1002%2fnbm.3057&partnerID=40&md5=b02a9bdf6160009dcabae01a7e9c9839		Article	Final		Scopus	2-s2.0-84892850124
24257433	Broad phenotypic heterogeneity due to a novel SCN1A mutation in a family with genetic epilepsy with febrile seizures plus	2014	Goldberg-Stern H., Aharoni S., Afawi Z., Bennett O., Appenzeller S., Pendziwiat M., Kuhlenbäumer G., Basel-Vanagaite L., Shuper A., Korczyn A.D., Helbig I.	Journal of Child Neurology	29	2		221	226		35	10.1177/0883073813509016	https://www.scopus.com/inward/record.uri?eid=2-s2.0-84892754932&doi=10.1177%2f0883073813509016&partnerID=40&md5=7beebf93bfa8c684fc04cb865b67c128		Article	Final		Scopus	2-s2.0-84892754932
24412860	Cognitive and adaptive evaluation of 21 consecutive patients with Dravet syndrome	2014	Villeneuve N., Laguitton V., Viellard M., Lépine A., Chabrol B., Dravet C., Milh M.	Epilepsy and Behavior	31			143	148		47	10.1016/j.yebeh.2013.11.021	https://www.scopus.com/inward/record.uri?eid=2-s2.0-84891800086&doi=10.1016%2fj.yebeh.2013.11.021&partnerID=40&md5=11ed98ac11948cb36cddc9dd57c52d42		Article	Final		Scopus	2-s2.0-84891800086
	Channelopathies	2014	Jarzembowski J.A.	Pathobiology of Human Disease: A Dynamic Encyclopedia of Disease Mechanisms				194	194		1	10.1016/B978-0-12-386456-7.01516-1	https://www.scopus.com/inward/record.uri?eid=2-s2.0-85043292469&doi=10.1016%2fB978-0-12-386456-7.01516-1&partnerID=40&md5=7063ab60d1105d0f3b786128c381debc		Book Chapter	Final		Scopus	2-s2.0-85043292469
	Migraine; Genetics	2014	de Vries B., Haan J., van den Maagdenberg A.M.J.M., Ferrari M.D.	Encyclopedia of the Neurological Sciences				42	46		1	10.1016/B978-0-12-385157-4.01086-1	https://www.scopus.com/inward/record.uri?eid=2-s2.0-85043234686&doi=10.1016%2fB978-0-12-385157-4.01086-1&partnerID=40&md5=1b82553992ba8a52fcd8dbfdacdc8916		Book Chapter	Final		Scopus	2-s2.0-85043234686
25669891	Association of severe myoclonic epilepsy of infancy (SMEI) with probable autoimmune lymphoproliferative syndrome-variant [Associazione di epilessia mioclonica severa (SMEI) con una probabile syndrome autoimmune linfoproliferativa-variante]	2014	Berio A., Mangiante G., Piazzi A.	Pediatria Medica e Chirurgica	36	5月6日		212	220		1	10.4081/pmc.2014.100	https://www.scopus.com/inward/record.uri?eid=2-s2.0-84994896159&doi=10.4081%2fpmc.2014.100&partnerID=40&md5=d4f3c27ae2f8f546528218ea13357c80		Article	Final	All Open Access, Gold, Green	Scopus	2-s2.0-84994896159
25012387	How can advances in epilepsy genetics lead to better treatments and cures?	2014	Guerrini R., Noebels J.	Advances in Experimental Medicine and Biology	813			309	317		15	10.1007/978-94-17-8914-1_25	https://www.scopus.com/inward/record.uri?eid=2-s2.0-84959196857&doi=10.1007%2f978-94-17-8914-1_25&partnerID=40&md5=6ab4bae7436cd5db193c2b78a8d2167e		Article	Final		Scopus	2-s2.0-84959196857
25268096	Association of SCN1A gene polymorphisms with infantile spasms and adrenocorticotropic hormone responsiveness	2014	Zhang Y., Zou L.-P., Ding Y.-X., He B., Yang G.	European Review for Medical and Pharmacological Sciences	18	17		2500	2506		3		https://www.scopus.com/inward/record.uri?eid=2-s2.0-84942249745&partnerID=40&md5=373cb73e5ab80278be3a9bafd63ae7f7		Article	Final		Scopus	2-s2.0-84942249745
25087078	Genetic determinants of common epilepsies: A meta-analysis of genome-wide association studies	2014	Anney R.J.L., Avbersek A., Balding D., Baum L., Becker F., Berkovic S.F., Bradfi J.P., Brody L.C., Buono R.J., Catarino C.B., Cavalleri G.L., Cherny S.S., Chinthapalli K., Coffey A.J., Compston A., Cossette P., De Haan G.-J., De Jonghe P., De Kovel C.G.F., Delanty N., Depondt C., Dlugos D.J., Doherty C.P., Elger C.E., Ferraro T.N., Feucht M., Franke A., French J., Gaus V., Goldstein D.B., Gui H.,…	The Lancet Neurology	13	9		893	903		166	10.1016/S1474-4422(14)70171-1	https://www.scopus.com/inward/record.uri?eid=2-s2.0-84942076987&doi=10.1016%2fS1474-4422%2814%2970171-1&partnerID=40&md5=128f3dc9b30dcdf84ab4a77817aed99a		Article	Final	All Open Access, Hybrid Gold, Green	Scopus	2-s2.0-84942076987
	Double trouble: Impairment of two interneuron types in a dravet mouse model	2014	Kearney J.A.	Epilepsy Currents	15	1		47	49			10.5698/1535-7597-15.1.47	https://www.scopus.com/inward/record.uri?eid=2-s2.0-84927616849&doi=10.5698%2f1535-7597-15.1.47&partnerID=40&md5=d60775f03cac0e2acb820afe74c4661b		Note	Final	All Open Access, Bronze, Green	Scopus	2-s2.0-84927616849
25194485	Mechanisms underlying epilepsies associated with sodium channel mutations	2014	Steinlein O.K.	Progress in Brain Research	213	C		97	111		11	10.1016/B978-0-444-63326-2.00005-3	https://www.scopus.com/inward/record.uri?eid=2-s2.0-84926386808&doi=10.1016%2fB978-0-444-63326-2.00005-3&partnerID=40&md5=b685a217334967363ec73840ed7cc32f		Book Chapter	Final		Scopus	2-s2.0-84926386808
25194493	New technologies in molecular genetics. the impact on epilepsy research	2014	Helbig I.	Progress in Brain Research	213	C		253	278		5	10.1016/B978-0-444-63326-2.00013-2	https://www.scopus.com/inward/record.uri?eid=2-s2.0-84926376618&doi=10.1016%2fB978-0-444-63326-2.00013-2&partnerID=40&md5=36955fa776496421f4f5a517ee8f4faf		Book Chapter	Final		Scopus	2-s2.0-84926376618
25225143	Etiologies for seizures around the time of vaccination	2014	Verbeek N.E., Jansen F.E., De Bondt P.E.V., De Kovel C.G., Van Kempen M.J.A., Lindhout D., Knoers N.V.A.M., Van Der Maas N.A.T., Brilstra E.H.	Pediatrics	134	4		658	666		26	10.1542/peds.2014-0690	https://www.scopus.com/inward/record.uri?eid=2-s2.0-84924630666&doi=10.1542%2fpeds.2014-0690&partnerID=40&md5=d4e523b086332d12a1cce473129964db		Article	Final		Scopus	2-s2.0-84924630666
	Screening of SCN1A gene mutation in 10 families with generalized epilepsy accompanied by febrile seizure	2014	Wu G.-S., Gao F., Shen Z., Mao S.-S., Shen J., Yuan Z.-F., Li S.	Medical Journal of Chinese People's Liberation Army	39	10		804	807			10.11855/j.issn.0577-7402.2014.10.09	https://www.scopus.com/inward/record.uri?eid=2-s2.0-84921860582&doi=10.11855%2fj.issn.0577-7402.2014.10.09&partnerID=40&md5=0aceeecda03e893cbcd69679409c6cd1		Article	Final		Scopus	2-s2.0-84921860582
25697436	Complex febrile seizures or dravet syndrome? Description of 3 case reports [¿Crisis febriles complejas o síndrome de dravet? Descripción de 3 casos clínicos]	2014	Hernández M.C., Pedraza M.H., Mesa T.L., Troncoso M.S.	Revista Chilena de Pediatria	85	5		588	593		1	10.4067/S0370-41062014000500010	https://www.scopus.com/inward/record.uri?eid=2-s2.0-84920525207&doi=10.4067%2fS0370-41062014000500010&partnerID=40&md5=442fb1e65bba88a5cc20a396ea6ca7ca		Article	Final	All Open Access, Gold, Green	Scopus	2-s2.0-84920525207
25342058	Dravet syndrome and disease mitochondrial, ¿comorbid conditions? [Síndrome de Dravet y enfermedad mitocondrial, ¿patologías comórbidas?]	2014	Cantarín-Extremera V., Luz Ruiz-Falcó Rojas M., García-Fernández M., Duat-Rodríguez A., López-Marín L., Calleja-Gero M.L.	Revista de Neurologia	59	9		429	431		1	10.33588/rn.5909.2014172	https://www.scopus.com/inward/record.uri?eid=2-s2.0-84908450292&doi=10.33588%2frn.5909.2014172&partnerID=40&md5=3c99b5c94fd4e0f2688ce23a8d529d4e		Letter	Final		Scopus	2-s2.0-84908450292
25048308	Brain morphometry of Dravet Syndrome	2014	Pérez A., García-Pentón L., Canales-Rodríguez E.J., Lerma-Usabiaga G., Iturria-Medina Y., Román F.J., Davidson D., Alemán-Gómez Y., Acha J., Carreiras M.	Epilepsy Research	108	8		1326	1334		11	10.1016/j.eplepsyres.2014.06.006	https://www.scopus.com/inward/record.uri?eid=2-s2.0-84906940547&doi=10.1016%2fj.eplepsyres.2014.06.006&partnerID=40&md5=7017121c96c165c74329f3b6dbddc9c5		Article	Final		Scopus	2-s2.0-84906940547
	SCN1A and febrile seizures in mesial temporal epilepsy: An early signal to guide prognosis and treatment?	2014	Rossi M.A.	Epilepsy Currents	14	4		189	190		3	10.5698/1535-7597-14.4.189	https://www.scopus.com/inward/record.uri?eid=2-s2.0-84906705277&doi=10.5698%2f1535-7597-14.4.189&partnerID=40&md5=5b94efb9822edb24e6b8585259bb3244		Article	Final	All Open Access, Green	Scopus	2-s2.0-84906705277
25155934	Association of SCN1A, SCN2A and ABCC2 gene polymorphisms with the response to antiepileptic drugs in Chinese Han patients with epilepsy	2014	Ma C.-L., Wu X.-Y., Zheng J., Wu Z.-Y., Hong Z., Zhong M.-K.	Pharmacogenomics	15	10		1323	1336		33	10.2217/pgs.14.89	https://www.scopus.com/inward/record.uri?eid=2-s2.0-84906683779&doi=10.2217%2fpgs.14.89&partnerID=40&md5=d3ef84582dc30155a2e520a2044d275c		Article	Final		Scopus	2-s2.0-84906683779
24861996	Association of ABCB1, CYP3A4, EPHX1, FAS, SCN1A, MICA, and BAG6 polymorphisms with the risk of carbamazepine-induced Stevens-Johnson syndrome/toxic epidermal necrolysis in Chinese Han patients with epilepsy	2014	He X.-J., Jian L.-Y., He X.-L., Tang M., Wu Y., Xu Y.-Y., Sun X.-J., Zhao L.-M.	Epilepsia	55	8		1301	1306		26	10.1111/epi.12655	https://www.scopus.com/inward/record.uri?eid=2-s2.0-84905513580&doi=10.1111%2fepi.12655&partnerID=40&md5=cd07142ed89f4fe747f8987af18fa9f5		Article	Final		Scopus	2-s2.0-84905513580
25024183	Impaired excitability of somatostatin- and parvalbumin-expressing cortical interneurons in a mouse model of Dravet syndrome	2014	Tai C., Abe Y., Westenbroek R.E., Scheuer T., Catterall W.A.	Proceedings of the National Academy of Sciences of the United States of America	111	30		E3139	E3148		112	10.1073/pnas.1411131111	https://www.scopus.com/inward/record.uri?eid=2-s2.0-84905011516&doi=10.1073%2fpnas.1411131111&partnerID=40&md5=ce5f823ff117ae5db9f2559f218a984b		Article	Final	All Open Access, Bronze, Green	Scopus	2-s2.0-84905011516
24342961	SCN1A variations and response to multiple antiepileptic drugs	2014	Yip T.S.C., O'Doherty C., Tan N.C.K., Dibbens L.M., Suppiah V.	Pharmacogenomics Journal	14	4		385	389		14	10.1038/tpj.2013.43	https://www.scopus.com/inward/record.uri?eid=2-s2.0-84905000243&doi=10.1038%2ftpj.2013.43&partnerID=40&md5=39dce8c6003116dc0866e3c4d792eb31		Article	Final	All Open Access, Bronze	Scopus	2-s2.0-84905000243
24168886	Early clinical features and diagnosis of Dravet syndrome in 138 Chinese patients with SCN1A mutations	2014	Xu X., Zhang Y., Sun H., Liu X., Yang X., Xiong H., Jiang Y., Bao X., Wang S., Yang Z., Wu Y., Qin J., Lin Q., Wu X.	Brain and Development	36	8		676	681		27	10.1016/j.braindev.2013.10.004	https://www.scopus.com/inward/record.uri?eid=2-s2.0-84904507658&doi=10.1016%2fj.braindev.2013.10.004&partnerID=40&md5=d6b7261200bd38f9d9cf97297f28d224		Article	Final		Scopus	2-s2.0-84904507658
24902755	Co-occurring malformations of cortical development and SCN1A gene mutations	2014	Barba C., Parrini E., Coras R., Galuppi A., Craiu D., Kluger G., Parmeggiani A., Pieper T., Schmitt-Mechelke T., Striano P., Giordano F., Blumcke I., Guerrini R.	Epilepsia	55	7		1009	1019		58	10.1111/epi.12658	https://www.scopus.com/inward/record.uri?eid=2-s2.0-84904403794&doi=10.1111%2fepi.12658&partnerID=40&md5=06456442426547bcb497ed3ca01f33ec		Article	Final	All Open Access, Bronze	Scopus	2-s2.0-84904403794
24836964	Dravet syndrome - From epileptic encephalopathy to channelopathy	2014	Brunklaus A., Zuberi S.M.	Epilepsia	55	7		979	984		77	10.1111/epi.12652	https://www.scopus.com/inward/record.uri?eid=2-s2.0-84904394777&doi=10.1111%2fepi.12652&partnerID=40&md5=1e2ab3d0160564f012a87698b6ce9fa3		Article	Final	All Open Access, Bronze	Scopus	2-s2.0-84904394777
24776920	Infantile epileptic encephalopathy with a hyperkinetic movement disorder and hand stereotypies associated with a novel SCN1A mutation	2014	Ohashi T., Akasaka N., Kobayashi Y., Magara S., Kawashima H., Matsumoto N., Saitsu H., Tohyama J.	Epileptic Disorders	16	2		208	212		8	10.1684/epd.2014.0649	https://www.scopus.com/inward/record.uri?eid=2-s2.0-84904383594&doi=10.1684%2fepd.2014.0649&partnerID=40&md5=b398cf628ffc89e8c7065236a736c93d		Note	Final		Scopus	2-s2.0-84904383594
24842605	A novel SCN1A mutation in a cytoplasmic loop in intractable juvenile myoclonic epilepsy without febrile seizures	2014	Jingami N., Matsumoto R., Ito H., Ishii A., Ihara Y., Hirose S., Ikeda A., Takahashi R.	Epileptic Disorders	16	2		227	231		3	10.1684/epd.2014.0657	https://www.scopus.com/inward/record.uri?eid=2-s2.0-84904381633&doi=10.1684%2fepd.2014.0657&partnerID=40&md5=bc5dcbef6f6a6c15c4c0ee9178847f02		Note	Final		Scopus	2-s2.0-84904381633
[truncated: 670 more rows]
